# Supplementary material for: eIF3 engages with 3’-UTR termini of highly translated mRNAs
Source: bioRxiv preprint, doi:10.1101/2023.11.11.566681, version 4 (2024-11-24)
Supplement: Supplementary File 2 [file 566681_file03.xlsx]

## Sheet: Sheet1
PeakID	Chr	Start	End	Strand	Peak Score	feature_types	type	Overlap_Lens	chrs	starts	stops	strands	closest_ID	closest_feature_types	closest_type	closest_Overlap_Lens	closest_chrs	closest_starts	closest_stops	closest_strands	All_ENSTs	TPM_ENSTs	Filter0_ID	Filter0_Hit_feature_types	Filter0_Hit_type	Filter0_Hit_Overlap_Lens	Filter0_Hit_chrs	Filter0_Hit_starts	Filter0_Hit_sFilter0s	Filter0_Hit_strands	5UTR_ENSTS	3UTR_ENSTS	Filter1_Hit	Filter1_Hit_feature_types	Filter1_Hit_type	Filter1_Hit_Overlap_Lens	Filter1_Hit_chrs	Filter1_Hit_starts	Filter1_Hit_stops	Filter1_Hit_strands	Filter2_Hit	Filter2_Hit_feature_types	Filter2_Hit_type	Filter2_Hit_Overlap_Lens	Filter2_Hit_chrs	Filter2_Hit_starts	Filter2_Hit_stops	Filter2_Hit_strands
Merged-chrM-9971-1	chrM	9934	10008	+	0	{'ENST00000362079.2': 'exon', 'ENST00000387429.1': 'exon'}	{'ENST00000362079.2': 'protein_coding', 'ENST00000387429.1': 'Mt_tRNA'}	{'ENST00000362079.2': 56, 'ENST00000387429.1': 18}	{'ENST00000362079.2': 'chrM', 'ENST00000387429.1': 'chrM'}	{'ENST00000362079.2': 9207.0, 'ENST00000387429.1': 9991.0}	{'ENST00000362079.2': 9990.0, 'ENST00000387429.1': 10058.0}	{'ENST00000362079.2': '+', 'ENST00000387429.1': '+'}	ENST00000362079.2	exon	protein_coding	56	chrM	9207	9990	+	['ENST00000362079.2', 'ENST00000387429.1']	[]	ENST00000362079.2	exon	protein_coding	56	chrM	9207	9990	+	[]	[]	ENST00000362079.2	exon	protein_coding	56	chrM	9207	9990	+	ENST00000362079.2	exon	protein_coding	56	chrM	9207	9990	+
Merged-chr21-8216578-1	chr21	8216541	8216615	+	0	{'ENST00000623664.1': 'Intron'}	{'ENST00000623664.1': 'lncRNA'}	{'ENST00000623664.1': 74}	{'ENST00000623664.1': 'chr21'}	{'ENST00000623664.1': 8201052.0}	{'ENST00000623664.1': 8222960.0}	{'ENST00000623664.1': '+'}	ENST00000623664.1	Intron	lncRNA	74	chr21	8201052	8222960	+	['ENST00000623664.1']	[]	ENST00000623664.1	Intron	lncRNA	74	chr21	8201052	8222960	+	[]	[]	ENST00000623664.1	Intron	lncRNA	74	chr21	8201052	8222960	+	ENST00000623664.1	Intron	lncRNA	74	chr21	8201052	8222960	+
Merged-chr11-69651719-1	chr11	69651682	69651756	+	0	{'ENST00000227507.3': '3UTR'}	{'ENST00000227507.3': 'protein_coding'}	{'ENST00000227507.3': 74}	{'ENST00000227507.3': 'chr11'}	{'ENST00000227507.3': 69651280.0}	{'ENST00000227507.3': 69654474.0}	{'ENST00000227507.3': '+'}	ENST00000227507.3	3UTR	protein_coding	74	chr11	69651280	69654474	+	['ENST00000227507.3']	['ENST00000227507.3']	ENST00000227507.3	3UTR	protein_coding	74	chr11	69651280	69654474	+	[]	['ENST00000227507.3']	ENST00000227507.3	3UTR	protein_coding	74	chr11	69651280	69654474	+	ENST00000227507.3	3UTR	protein_coding	74	chr11	69651280	69654474	+
Merged-chr11-10803913-1	chr11	10803876	10803950	-	0	{'ENST00000526148.6': 'Intron'}	{'ENST00000526148.6': 'protein_coding'}	{'ENST00000526148.6': 22}	{'ENST00000526148.6': 'chr11'}	{'ENST00000526148.6': 10803590.0}	{'ENST00000526148.6': 10803898.0}	{'ENST00000526148.6': '-'}	ENST00000526148.6	Intron	protein_coding	22	chr11	10803590	10803898	-	['ENST00000526148.6']	[]	ENST00000526148.6	Intron	protein_coding	22	chr11	10803590	10803898	-	[]	[]	ENST00000526148.6	Intron	protein_coding	22	chr11	10803590	10803898	-	ENST00000526148.6	Intron	protein_coding	22	chr11	10803590	10803898	-
Merged-chr11-57810180-1	chr11	57810143	57810217	+	0	{'ENST00000674116.1': 'exon'}	{'ENST00000674116.1': 'protein_coding'}	{'ENST00000674116.1': 74}	{'ENST00000674116.1': 'chr11'}	{'ENST00000674116.1': 57810109.0}	{'ENST00000674116.1': 57810223.0}	{'ENST00000674116.1': '+'}	ENST00000674116.1	exon	protein_coding	74	chr11	57810109	57810223	+	['ENST00000674116.1']	[]	ENST00000674116.1	exon	protein_coding	74	chr11	57810109	57810223	+	[]	[]	ENST00000674116.1	exon	protein_coding	74	chr11	57810109	57810223	+	ENST00000674116.1	exon	protein_coding	74	chr11	57810109	57810223	+
Merged-chr11-62765923-1	chr11	62765886	62765960	-	0	{'ENST00000301788.12': 'Intron'}	{'ENST00000301788.12': 'protein_coding'}	{'ENST00000301788.12': 74}	{'ENST00000301788.12': 'chr11'}	{'ENST00000301788.12': 62765724.0}	{'ENST00000301788.12': 62766242.0}	{'ENST00000301788.12': '+'}	ENST00000301788.12	Intron	protein_coding	74	chr11	62765724	62766242	+	['ENST00000301788.12']	['ENST00000301788.12']	ENST00000301788.12	Intron	protein_coding	74	chr11	62765724	62766242	+	[]	[]	ENST00000301788.12	Intron	protein_coding	74	chr11	62765724	62766242	+	ENST00000301788.12	Intron	protein_coding	74	chr11	62765724	62766242	+
Merged-chr11-64765390-1	chr11	64765353	64765427	-	0	{'ENST00000377387.5': '3UTR', 'ENST00000377394.7': '3UTR', 'ENST00000486867.2': '3UTR', 'ENST00000706684.1': '3UTR', 'ENST00000706685.1': '3UTR', 'ENST00000377390.8': 'exon', 'ENST00000681407.1': 'exon'}	{'ENST00000377387.5': 'protein_coding', 'ENST00000377394.7': 'protein_coding', 'ENST00000486867.2': 'protein_coding', 'ENST00000706684.1': 'protein_coding', 'ENST00000706685.1': 'protein_coding', 'ENST00000377390.8': 'protein_coding', 'ENST00000681407.1': 'protein_coding'}	{'ENST00000377387.5': 74, 'ENST00000377394.7': 38, 'ENST00000486867.2': 74, 'ENST00000706684.1': 38, 'ENST00000706685.1': 38, 'ENST00000377390.8': 74, 'ENST00000681407.1': 74}	{'ENST00000377387.5': 'chr11', 'ENST00000377394.7': 'chr11', 'ENST00000486867.2': 'chr11', 'ENST00000706684.1': 'chr11', 'ENST00000706685.1': 'chr11', 'ENST00000377390.8': 'chr11', 'ENST00000681407.1': 'chr11'}	{'ENST00000377387.5': 64764606.0, 'ENST00000377394.7': 64764606.0, 'ENST00000486867.2': 64764606.0, 'ENST00000706684.1': 64764614.0, 'ENST00000706685.1': 64764809.0, 'ENST00000377390.8': 64764606.0, 'ENST00000681407.1': 64764611.0}	{'ENST00000377387.5': 64765456.0, 'ENST00000377394.7': 64765391.0, 'ENST00000486867.2': 64765908.0, 'ENST00000706684.1': 64765391.0, 'ENST00000706685.1': 64765391.0, 'ENST00000377390.8': 64766155.0, 'ENST00000681407.1': 64766155.0}	{'ENST00000377387.5': '-', 'ENST00000377394.7': '-', 'ENST00000486867.2': '-', 'ENST00000706684.1': '-', 'ENST00000706685.1': '-', 'ENST00000377390.8': '-', 'ENST00000681407.1': '-'}	ENST00000681407.1	exon	protein_coding	74	chr11	64764611	64766155	-	['ENST00000377387.5', 'ENST00000377394.7', 'ENST00000486867.2', 'ENST00000706684.1', 'ENST00000706685.1', 'ENST00000377390.8', 'ENST00000681407.1']	['ENST00000377390.8']	ENST00000377390.8	exon	protein_coding	74	chr11	64764606	64766155	-	[]	['ENST00000377387.5', 'ENST00000377394.7', 'ENST00000486867.2', 'ENST00000706684.1', 'ENST00000706685.1']	ENST00000377387.5	3UTR	protein_coding	74	chr11	64764606	64765456	-	ENST00000377390.8	exon	protein_coding	74	chr11	64764606	64766155	-
Merged-chr11-64778417-1	chr11	64778380	64778454	-	0	{'ENST00000377387.5': '5UTR', 'ENST00000377390.8': '5UTR', 'ENST00000227503.13': '5UTR', 'ENST00000486867.2': '5UTR', 'ENST00000334944.9': '5UTR', 'ENST00000681407.1': '5UTR', 'ENST00000706684.1': '5UTR', 'ENST00000706685.1': '5UTR'}	{'ENST00000377387.5': 'protein_coding', 'ENST00000377390.8': 'protein_coding', 'ENST00000227503.13': 'protein_coding', 'ENST00000486867.2': 'protein_coding', 'ENST00000334944.9': 'protein_coding', 'ENST00000681407.1': 'protein_coding', 'ENST00000706684.1': 'protein_coding', 'ENST00000706685.1': 'protein_coding'}	{'ENST00000377387.5': 62, 'ENST00000377390.8': 62, 'ENST00000227503.13': 62, 'ENST00000486867.2': 62, 'ENST00000334944.9': 62, 'ENST00000681407.1': 62, 'ENST00000706684.1': 62, 'ENST00000706685.1': 62}	{'ENST00000377387.5': 'chr11', 'ENST00000377390.8': 'chr11', 'ENST00000227503.13': 'chr11', 'ENST00000486867.2': 'chr11', 'ENST00000334944.9': 'chr11', 'ENST00000681407.1': 'chr11', 'ENST00000706684.1': 'chr11', 'ENST00000706685.1': 'chr11'}	{'ENST00000377387.5': 64778393.0, 'ENST00000377390.8': 64778393.0, 'ENST00000227503.13': 64778393.0, 'ENST00000486867.2': 64778393.0, 'ENST00000334944.9': 64778393.0, 'ENST00000681407.1': 64778393.0, 'ENST00000706684.1': 64778393.0, 'ENST00000706685.1': 64778393.0}	{'ENST00000377387.5': 64778469.0, 'ENST00000377390.8': 64778542.0, 'ENST00000227503.13': 64778747.0, 'ENST00000486867.2': 64778771.0, 'ENST00000334944.9': 64778786.0, 'ENST00000681407.1': 64778521.0, 'ENST00000706684.1': 64778533.0, 'ENST00000706685.1': 64778528.0}	{'ENST00000377387.5': '-', 'ENST00000377390.8': '-', 'ENST00000227503.13': '-', 'ENST00000486867.2': '-', 'ENST00000334944.9': '-', 'ENST00000681407.1': '-', 'ENST00000706684.1': '-', 'ENST00000706685.1': '-'}	ENST00000377387.5	5UTR	protein_coding	62	chr11	64778393	64778469	-	['ENST00000377387.5', 'ENST00000377390.8', 'ENST00000227503.13', 'ENST00000486867.2', 'ENST00000334944.9', 'ENST00000681407.1', 'ENST00000706684.1', 'ENST00000706685.1']	['ENST00000377390.8']	ENST00000377390.8	5UTR	protein_coding	62	chr11	64778393	64778542	-	['ENST00000377387.5', 'ENST00000377390.8', 'ENST00000227503.13', 'ENST00000486867.2', 'ENST00000334944.9', 'ENST00000681407.1', 'ENST00000706684.1', 'ENST00000706685.1']	[]	ENST00000377390.8	5UTR	protein_coding	62	chr11	64778393	64778542	-	ENST00000377387.5	5UTR	protein_coding	62	chr11	64778393	64778469	-
Merged-chr11-126262931-1	chr11	126262894	126262968	-	0	{'ENST00000627851.2': '3UTR', 'ENST00000533050.6': '3UTR', 'ENST00000332118.11': '3UTR'}	{'ENST00000627851.2': 'protein_coding', 'ENST00000533050.6': 'protein_coding', 'ENST00000332118.11': 'protein_coding'}	{'ENST00000627851.2': 74, 'ENST00000533050.6': 74, 'ENST00000332118.11': 31}	{'ENST00000627851.2': 'chr11', 'ENST00000533050.6': 'chr11', 'ENST00000332118.11': 'chr11'}	{'ENST00000627851.2': 126262131.0, 'ENST00000533050.6': 126262131.0, 'ENST00000332118.11': 126262938.0}	{'ENST00000627851.2': 126262984.0, 'ENST00000533050.6': 126262968.0, 'ENST00000332118.11': 126263918.0}	{'ENST00000627851.2': '+', 'ENST00000533050.6': '+', 'ENST00000332118.11': '-'}	ENST00000627851.2	3UTR	protein_coding	74	chr11	126262131	126262984	+	['ENST00000627851.2', 'ENST00000533050.6', 'ENST00000332118.11']	['ENST00000533050.6', 'ENST00000332118.11']	ENST00000533050.6	3UTR	protein_coding	74	chr11	126262131	126262968	+	[]	['ENST00000627851.2', 'ENST00000533050.6', 'ENST00000332118.11']	ENST00000627851.2	3UTR	protein_coding	74	chr11	126262131	126262984	+	ENST00000533050.6	3UTR	protein_coding	74	chr11	126262131	126262968	+
Merged-chr11-31370813-1	chr11	31370776	31370850	+	0	{'ENST00000465995.6': 'CDS'}	{'ENST00000465995.6': 'protein_coding'}	{'ENST00000465995.6': 74}	{'ENST00000465995.6': 'chr11'}	{'ENST00000465995.6': 31370749.0}	{'ENST00000465995.6': 31370859.0}	{'ENST00000465995.6': '+'}	ENST00000465995.6	CDS	protein_coding	74	chr11	31370749	31370859	+	['ENST00000465995.6']	['ENST00000465995.6']	ENST00000465995.6	CDS	protein_coding	74	chr11	31370749	31370859	+	[]	[]	ENST00000465995.6	CDS	protein_coding	74	chr11	31370749	31370859	+	ENST00000465995.6	CDS	protein_coding	74	chr11	31370749	31370859	+
Merged-chr11-57672385-1	chr11	57672348	57672422	+	0	{'ENST00000287169.8': 'AltUTR', 'ENST00000527985.5': 'Intron'}	{'ENST00000287169.8': 'protein_coding', 'ENST00000527985.5': 'protein_coding'}	{'ENST00000287169.8': 74, 'ENST00000527985.5': 74}	{'ENST00000287169.8': 'chr11', 'ENST00000527985.5': 'chr11'}	{'ENST00000287169.8': 57672021.0, 'ENST00000527985.5': 57668187.0}	{'ENST00000287169.8': 57673090.0, 'ENST00000527985.5': 57682421.0}	{'ENST00000287169.8': '+', 'ENST00000527985.5': '+'}	ENST00000287169.8	AltUTR	protein_coding	74	chr11	57672021	57673090	+	['ENST00000287169.8', 'ENST00000527985.5']	['ENST00000287169.8']	ENST00000287169.8	AltUTR	protein_coding	74	chr11	57672021	57673090	+	[]	[]	ENST00000287169.8	AltUTR	protein_coding	74	chr11	57672021	57673090	+	ENST00000287169.8	AltUTR	protein_coding	74	chr11	57672021	57673090	+
Merged-chr11-58617755-1	chr11	58617718	58617792	+	0	{'ENST00000316059.7': '3UTR', 'ENST00000389919.8': 'Intron'}	{'ENST00000316059.7': 'protein_coding', 'ENST00000389919.8': 'protein_coding'}	{'ENST00000316059.7': 74, 'ENST00000389919.8': 74}	{'ENST00000316059.7': 'chr11', 'ENST00000389919.8': 'chr11'}	{'ENST00000316059.7': 58617704.0, 'ENST00000389919.8': 58617568.0}	{'ENST00000316059.7': 58621550.0, 'ENST00000389919.8': 58622765.0}	{'ENST00000316059.7': '+', 'ENST00000389919.8': '+'}	ENST00000316059.7	3UTR	protein_coding	74	chr11	58617704	58621550	+	['ENST00000316059.7', 'ENST00000389919.8']	['ENST00000316059.7']	ENST00000316059.7	3UTR	protein_coding	74	chr11	58617704	58621550	+	[]	['ENST00000316059.7']	ENST00000316059.7	3UTR	protein_coding	74	chr11	58617704	58621550	+	ENST00000316059.7	3UTR	protein_coding	74	chr11	58617704	58621550	+
Merged-chr11-62832934-1	chr11	62832897	62832971	-	0	{'ENST00000311713.11': '3UTR', 'ENST00000529106.5': '3UTR', 'ENST00000525752.5': 'exon', 'ENST00000535817.1': 'Intron'}	{'ENST00000311713.11': 'protein_coding', 'ENST00000529106.5': 'protein_coding', 'ENST00000525752.5': 'protein_coding', 'ENST00000535817.1': 'lncRNA'}	{'ENST00000311713.11': 44, 'ENST00000529106.5': 43, 'ENST00000525752.5': 20, 'ENST00000535817.1': 74}	{'ENST00000311713.11': 'chr11', 'ENST00000529106.5': 'chr11', 'ENST00000525752.5': 'chr11', 'ENST00000535817.1': 'chr11'}	{'ENST00000311713.11': 62832911.0, 'ENST00000529106.5': 62832912.0, 'ENST00000525752.5': 62832952.0, 'ENST00000535817.1': 62832317.0}	{'ENST00000311713.11': 62832954.0, 'ENST00000529106.5': 62832954.0, 'ENST00000525752.5': 62833131.0, 'ENST00000535817.1': 62833562.0}	{'ENST00000311713.11': '-', 'ENST00000529106.5': '-', 'ENST00000525752.5': '-', 'ENST00000535817.1': '+'}	ENST00000535817.1	Intron	lncRNA	74	chr11	62832317	62833562	+	['ENST00000311713.11', 'ENST00000529106.5', 'ENST00000525752.5', 'ENST00000535817.1']	[]	ENST00000535817.1	Intron	lncRNA	74	chr11	62832317	62833562	+	[]	['ENST00000311713.11', 'ENST00000529106.5']	ENST00000311713.11	3UTR	protein_coding	44	chr11	62832911	62832954	-	ENST00000535817.1	Intron	lncRNA	74	chr11	62832317	62833562	+
Merged-chr11-63998399-1	chr11	63998362	63998436	+	0	{'ENST00000541478.5': '3UTR', 'ENST00000538426.6': '3UTR', 'ENST00000535715.5': 'Intron'}	{'ENST00000541478.5': 'protein_coding', 'ENST00000538426.6': 'protein_coding', 'ENST00000535715.5': 'protein_coding'}	{'ENST00000541478.5': 14, 'ENST00000538426.6': 50, 'ENST00000535715.5': 74}	{'ENST00000541478.5': 'chr11', 'ENST00000538426.6': 'chr11', 'ENST00000535715.5': 'chr11'}	{'ENST00000541478.5': 63997544.0, 'ENST00000538426.6': 63997544.0, 'ENST00000535715.5': 63997768.0}	{'ENST00000541478.5': 63998376.0, 'ENST00000538426.6': 63998412.0, 'ENST00000535715.5': 64001455.0}	{'ENST00000541478.5': '+', 'ENST00000538426.6': '+', 'ENST00000535715.5': '+'}	ENST00000535715.5	Intron	protein_coding	74	chr11	63997768	64001455	+	['ENST00000541478.5', 'ENST00000538426.6', 'ENST00000535715.5']	['ENST00000538426.6']	ENST00000538426.6	3UTR	protein_coding	50	chr11	63997544	63998412	+	[]	['ENST00000541478.5', 'ENST00000538426.6']	ENST00000538426.6	3UTR	protein_coding	50	chr11	63997544	63998412	+	ENST00000538426.6	3UTR	protein_coding	50	chr11	63997544	63998412	+
Merged-chr11-66435834-1	chr11	66435797	66435871	-	0	{'ENST00000310999.11': '3UTR', 'ENST00000329819.4': 'exon'}	{'ENST00000310999.11': 'protein_coding', 'ENST00000329819.4': 'protein_coding'}	{'ENST00000310999.11': 74, 'ENST00000329819.4': 34}	{'ENST00000310999.11': 'chr11', 'ENST00000329819.4': 'chr11'}	{'ENST00000310999.11': 66435075.0, 'ENST00000329819.4': 66435838.0}	{'ENST00000310999.11': 66436009.0, 'ENST00000329819.4': 66436112.0}	{'ENST00000310999.11': '-', 'ENST00000329819.4': '-'}	ENST00000310999.11	3UTR	protein_coding	74	chr11	66435075	66436009	-	['ENST00000310999.11', 'ENST00000329819.4']	['ENST00000310999.11']	ENST00000310999.11	3UTR	protein_coding	74	chr11	66435075	66436009	-	[]	['ENST00000310999.11']	ENST00000310999.11	3UTR	protein_coding	74	chr11	66435075	66436009	-	ENST00000310999.11	3UTR	protein_coding	74	chr11	66435075	66436009	-
Merged-chr11-66858290-1	chr11	66858253	66858327	+	0	{'ENST00000309602.5': 'CDS', 'ENST00000393952.3': 'CDS', 'ENST00000529047.6': 'Intron'}	{'ENST00000309602.5': 'protein_coding', 'ENST00000393952.3': 'protein_coding', 'ENST00000529047.6': 'protein_coding'}	{'ENST00000309602.5': 74, 'ENST00000393952.3': 74, 'ENST00000529047.6': 74}	{'ENST00000309602.5': 'chr11', 'ENST00000393952.3': 'chr11', 'ENST00000529047.6': 'chr11'}	{'ENST00000309602.5': 66857745.0, 'ENST00000393952.3': 66857745.0, 'ENST00000529047.6': 66853383.0}	{'ENST00000309602.5': 66859093.0, 'ENST00000393952.3': 66858876.0, 'ENST00000529047.6': 66863773.0}	{'ENST00000309602.5': '+', 'ENST00000393952.3': '+', 'ENST00000529047.6': '-'}	ENST00000309602.5	CDS	protein_coding	74	chr11	66857745	66859093	+	['ENST00000309602.5', 'ENST00000393952.3', 'ENST00000529047.6']	['ENST00000309602.5']	ENST00000309602.5	CDS	protein_coding	74	chr11	66857745	66859093	+	[]	[]	ENST00000309602.5	CDS	protein_coding	74	chr11	66857745	66859093	+	ENST00000309602.5	CDS	protein_coding	74	chr11	66857745	66859093	+
Merged-chr11-114097947-1	chr11	114097910	114097984	-	0	{'ENST00000682278.1': 'Intron', 'ENST00000684612.1': 'Intron'}	{'ENST00000682278.1': 'protein_coding', 'ENST00000684612.1': 'protein_coding'}	{'ENST00000682278.1': 74, 'ENST00000684612.1': 74}	{'ENST00000682278.1': 'chr11', 'ENST00000684612.1': 'chr11'}	{'ENST00000682278.1': 114064568.0, 'ENST00000684612.1': 114064568.0}	{'ENST00000682278.1': 114156336.0, 'ENST00000684612.1': 114153048.0}	{'ENST00000682278.1': '+', 'ENST00000684612.1': '+'}	ENST00000682278.1	Intron	protein_coding	74	chr11	114064568	114156336	+	['ENST00000682278.1', 'ENST00000684612.1']	[]	ENST00000682278.1	Intron	protein_coding	74	chr11	114064568	114156336	+	[]	[]	ENST00000682278.1	Intron	protein_coding	74	chr11	114064568	114156336	+	ENST00000682278.1	Intron	protein_coding	74	chr11	114064568	114156336	+
Merged-chr11-117285706-1	chr11	117285669	117285743	-	0	{'ENST00000300650.9': '3UTR', 'ENST00000531452.5': '3UTR', 'ENST00000530849.1': '3UTR', 'ENST00000680971.1': '3UTR', 'ENST00000313005.11': '3UTR', 'ENST00000392937.10': '3UTR'}	{'ENST00000300650.9': 'protein_coding', 'ENST00000531452.5': 'protein_coding', 'ENST00000530849.1': 'protein_coding', 'ENST00000680971.1': 'protein_coding', 'ENST00000313005.11': 'protein_coding', 'ENST00000392937.10': 'protein_coding'}	{'ENST00000300650.9': 74, 'ENST00000531452.5': 19, 'ENST00000530849.1': 74, 'ENST00000680971.1': 74, 'ENST00000313005.11': 46, 'ENST00000392937.10': 38}	{'ENST00000300650.9': 'chr11', 'ENST00000531452.5': 'chr11', 'ENST00000530849.1': 'chr11', 'ENST00000680971.1': 'chr11', 'ENST00000313005.11': 'chr11', 'ENST00000392937.10': 'chr11'}	{'ENST00000300650.9': 117285149.0, 'ENST00000531452.5': 117285149.0, 'ENST00000530849.1': 117285149.0, 'ENST00000680971.1': 117285232.0, 'ENST00000313005.11': 117285698.0, 'ENST00000392937.10': 117285706.0}	{'ENST00000300650.9': 117286454.0, 'ENST00000531452.5': 117285688.0, 'ENST00000530849.1': 117286445.0, 'ENST00000680971.1': 117289568.0, 'ENST00000313005.11': 117289568.0, 'ENST00000392937.10': 117289568.0}	{'ENST00000300650.9': '+', 'ENST00000531452.5': '+', 'ENST00000530849.1': '+', 'ENST00000680971.1': '-', 'ENST00000313005.11': '-', 'ENST00000392937.10': '-'}	ENST00000680971.1	3UTR	protein_coding	74	chr11	117285232	117289568	-	['ENST00000300650.9', 'ENST00000531452.5', 'ENST00000530849.1', 'ENST00000680971.1', 'ENST00000313005.11', 'ENST00000392937.10']	['ENST00000300650.9', 'ENST00000313005.11']	ENST00000300650.9	3UTR	protein_coding	74	chr11	117285149	117286454	+	[]	['ENST00000300650.9', 'ENST00000531452.5', 'ENST00000530849.1', 'ENST00000680971.1', 'ENST00000313005.11', 'ENST00000392937.10']	ENST00000300650.9	3UTR	protein_coding	74	chr11	117285149	117286454	+	ENST00000300650.9	3UTR	protein_coding	74	chr11	117285149	117286454	+
Merged-chr11-119309234-1	chr11	119309197	119309271	-	0	{'ENST00000264036.6': '3UTR'}	{'ENST00000264036.6': 'protein_coding'}	{'ENST00000264036.6': 74}	{'ENST00000264036.6': 'chr11'}	{'ENST00000264036.6': 119308529.0}	{'ENST00000264036.6': 119309888.0}	{'ENST00000264036.6': '-'}	ENST00000264036.6	3UTR	protein_coding	74	chr11	119308529	119309888	-	['ENST00000264036.6']	['ENST00000264036.6']	ENST00000264036.6	3UTR	protein_coding	74	chr11	119308529	119309888	-	[]	['ENST00000264036.6']	ENST00000264036.6	3UTR	protein_coding	74	chr11	119308529	119309888	-	ENST00000264036.6	3UTR	protein_coding	74	chr11	119308529	119309888	-
Merged-chr11-119337309-1	chr11	119337272	119337346	+	0	{'ENST00000311413.5': '3UTR', 'ENST00000501918.2': 'exon'}	{'ENST00000311413.5': 'protein_coding', 'ENST00000501918.2': 'lncRNA'}	{'ENST00000311413.5': 37, 'ENST00000501918.2': 37}	{'ENST00000311413.5': 'chr11', 'ENST00000501918.2': 'chr11'}	{'ENST00000311413.5': 119336422.0, 'ENST00000501918.2': 119337048.0}	{'ENST00000311413.5': 119337309.0, 'ENST00000501918.2': 119337309.0}	{'ENST00000311413.5': '+', 'ENST00000501918.2': '-'}	ENST00000501918.2	exon	lncRNA	37	chr11	119337048	119337309	-	['ENST00000311413.5', 'ENST00000501918.2']	['ENST00000311413.5']	ENST00000311413.5	3UTR	protein_coding	37	chr11	119336422	119337309	+	[]	['ENST00000311413.5']	ENST00000311413.5	3UTR	protein_coding	37	chr11	119336422	119337309	+	ENST00000311413.5	3UTR	protein_coding	37	chr11	119336422	119337309	+
Merged-chr11-215090-1	chr11	215053	215127	+	0	{'ENST00000526104.6': '3UTR', 'ENST00000382743.9': '3UTR'}	{'ENST00000526104.6': 'protein_coding', 'ENST00000382743.9': 'protein_coding'}	{'ENST00000526104.6': 60, 'ENST00000382743.9': 74}	{'ENST00000526104.6': 'chr11', 'ENST00000382743.9': 'chr11'}	{'ENST00000526104.6': 214348.0, 'ENST00000382743.9': 215030.0}	{'ENST00000526104.6': 215113.0, 'ENST00000382743.9': 216700.0}	{'ENST00000526104.6': '+', 'ENST00000382743.9': '-'}	ENST00000382743.9	3UTR	protein_coding	74	chr11	215030	216700	-	['ENST00000526104.6', 'ENST00000382743.9']	['ENST00000526104.6', 'ENST00000382743.9']	ENST00000382743.9	3UTR	protein_coding	74	chr11	215030	216700	-	[]	['ENST00000526104.6', 'ENST00000382743.9']	ENST00000382743.9	3UTR	protein_coding	74	chr11	215030	216700	-	ENST00000382743.9	3UTR	protein_coding	74	chr11	215030	216700	-
Merged-chr11-12944383-1	chr11	12944346	12944420	+	0	{'ENST00000527636.7': '3UTR', 'ENST00000526600.1': '3UTR'}	{'ENST00000527636.7': 'protein_coding', 'ENST00000526600.1': 'protein_coding'}	{'ENST00000527636.7': 74, 'ENST00000526600.1': 74}	{'ENST00000527636.7': 'chr11', 'ENST00000526600.1': 'chr11'}	{'ENST00000527636.7': 12937220.0, 'ENST00000526600.1': 12937220.0}	{'ENST00000527636.7': 12944737.0, 'ENST00000526600.1': 12944483.0}	{'ENST00000527636.7': '+', 'ENST00000526600.1': '+'}	ENST00000527636.7	3UTR	protein_coding	74	chr11	12937220	12944737	+	['ENST00000527636.7', 'ENST00000526600.1']	['ENST00000527636.7']	ENST00000527636.7	3UTR	protein_coding	74	chr11	12937220	12944737	+	[]	['ENST00000527636.7', 'ENST00000526600.1']	ENST00000527636.7	3UTR	protein_coding	74	chr11	12937220	12944737	+	ENST00000527636.7	3UTR	protein_coding	74	chr11	12937220	12944737	+
Merged-chr11-22827263-1	chr11	22827226	22827300	-	0	{'ENST00000354193.5': 'exon'}	{'ENST00000354193.5': 'protein_coding'}	{'ENST00000354193.5': 74}	{'ENST00000354193.5': 'chr11'}	{'ENST00000354193.5': 22827207.0}	{'ENST00000354193.5': 22827320.0}	{'ENST00000354193.5': '-'}	ENST00000354193.5	exon	protein_coding	74	chr11	22827207	22827320	-	['ENST00000354193.5']	['ENST00000354193.5']	ENST00000354193.5	exon	protein_coding	74	chr11	22827207	22827320	-	[]	[]	ENST00000354193.5	exon	protein_coding	74	chr11	22827207	22827320	-	ENST00000354193.5	exon	protein_coding	74	chr11	22827207	22827320	-
Merged-chr13-37580581-1	chr13	37580544	37580618	-	0	{'ENST00000541179.5': 'Intron'}	{'ENST00000541179.5': 'protein_coding'}	{'ENST00000541179.5': 16}	{'ENST00000541179.5': 'chr13'}	{'ENST00000541179.5': 37579991.0}	{'ENST00000541179.5': 37580560.0}	{'ENST00000541179.5': '-'}	ENST00000541179.5	Intron	protein_coding	16	chr13	37579991	37580560	-	['ENST00000541179.5']	[]	ENST00000541179.5	Intron	protein_coding	16	chr13	37579991	37580560	-	[]	[]	ENST00000541179.5	Intron	protein_coding	16	chr13	37579991	37580560	-	ENST00000541179.5	Intron	protein_coding	16	chr13	37579991	37580560	-
Merged-chr13-38362715-1	chr13	38362678	38362752	+	0	{'ENST00000239878.9': '3UTR'}	{'ENST00000239878.9': 'protein_coding'}	{'ENST00000239878.9': 74}	{'ENST00000239878.9': 'chr13'}	{'ENST00000239878.9': 38360776.0}	{'ENST00000239878.9': 38363619.0}	{'ENST00000239878.9': '+'}	ENST00000239878.9	3UTR	protein_coding	74	chr13	38360776	38363619	+	['ENST00000239878.9']	['ENST00000239878.9']	ENST00000239878.9	3UTR	protein_coding	74	chr13	38360776	38363619	+	[]	['ENST00000239878.9']	ENST00000239878.9	3UTR	protein_coding	74	chr13	38360776	38363619	+	ENST00000239878.9	3UTR	protein_coding	74	chr13	38360776	38363619	+
Merged-chr13-38922183-1	chr13	38922146	38922220	+	0	{'Intergenic': 'Unlabeled'}	{'Intergenic': 'Intergenic'}	{'Intergenic': 0}	{'Intergenic': nan}	{'Intergenic': nan}	{'Intergenic': nan}	{'Intergenic': '+'}	Intergenic	Unlabeled	Intergenic	0				+	['Intergenic']	[]	Intergenic	Unlabeled	Intergenic	0				+	[]	[]	Intergenic	Unlabeled	Intergenic	0				+	Intergenic	Unlabeled	Intergenic	0				+
Merged-chr13-39602991-1	chr13	39602954	39603028	-	0	{'ENST00000379589.4': 'exon'}	{'ENST00000379589.4': 'protein_coding'}	{'ENST00000379589.4': 74}	{'ENST00000379589.4': 'chr13'}	{'ENST00000379589.4': 39602883.0}	{'ENST00000379589.4': 39603193.0}	{'ENST00000379589.4': '-'}	ENST00000379589.4	exon	protein_coding	74	chr13	39602883	39603193	-	['ENST00000379589.4']	['ENST00000379589.4']	ENST00000379589.4	exon	protein_coding	74	chr13	39602883	39603193	-	[]	[]	ENST00000379589.4	exon	protein_coding	74	chr13	39602883	39603193	-	ENST00000379589.4	exon	protein_coding	74	chr13	39602883	39603193	-
Merged-chr13-40558942-1	chr13	40558905	40558979	-	0	{'ENST00000379561.6': 'exon', 'ENST00000636651.2': 'Intron'}	{'ENST00000379561.6': 'protein_coding', 'ENST00000636651.2': 'lncRNA'}	{'ENST00000379561.6': 74, 'ENST00000636651.2': 74}	{'ENST00000379561.6': 'chr13', 'ENST00000636651.2': 'chr13'}	{'ENST00000379561.6': 40555667.0, 'ENST00000636651.2': 40474095.0}	{'ENST00000379561.6': 40559034.0, 'ENST00000636651.2': 40559508.0}	{'ENST00000379561.6': '-', 'ENST00000636651.2': '-'}	ENST00000379561.6	exon	protein_coding	74	chr13	40555667	40559034	-	['ENST00000379561.6', 'ENST00000636651.2']	['ENST00000379561.6']	ENST00000379561.6	exon	protein_coding	74	chr13	40555667	40559034	-	[]	[]	ENST00000379561.6	exon	protein_coding	74	chr13	40555667	40559034	-	ENST00000379561.6	exon	protein_coding	74	chr13	40555667	40559034	-
Merged-chr13-45252966-1	chr13	45252929	45253003	+	0	{'ENST00000340473.8': 'Intron'}	{'ENST00000340473.8': 'protein_coding'}	{'ENST00000340473.8': 34}	{'ENST00000340473.8': 'chr13'}	{'ENST00000340473.8': 45252970.0}	{'ENST00000340473.8': 45267232.0}	{'ENST00000340473.8': '+'}	ENST00000340473.8	Intron	protein_coding	34	chr13	45252970	45267232	+	['ENST00000340473.8']	['ENST00000340473.8']	ENST00000340473.8	Intron	protein_coding	34	chr13	45252970	45267232	+	[]	[]	ENST00000340473.8	Intron	protein_coding	34	chr13	45252970	45267232	+	ENST00000340473.8	Intron	protein_coding	34	chr13	45252970	45267232	+
Merged-chr13-52461280-1	chr13	52461243	52461317	+	0	{'ENST00000378034.7': 'exon'}	{'ENST00000378034.7': 'protein_coding'}	{'ENST00000378034.7': 74}	{'ENST00000378034.7': 'chr13'}	{'ENST00000378034.7': 52461058.0}	{'ENST00000378034.7': 52461926.0}	{'ENST00000378034.7': '+'}	ENST00000378034.7	exon	protein_coding	74	chr13	52461058	52461926	+	['ENST00000378034.7']	[]	ENST00000378034.7	exon	protein_coding	74	chr13	52461058	52461926	+	[]	[]	ENST00000378034.7	exon	protein_coding	74	chr13	52461058	52461926	+	ENST00000378034.7	exon	protein_coding	74	chr13	52461058	52461926	+
Merged-chr13-57725877-1	chr13	57725840	57725914	+	0	{'ENST00000377918.8': '3UTR'}	{'ENST00000377918.8': 'protein_coding'}	{'ENST00000377918.8': 74}	{'ENST00000377918.8': 'chr13'}	{'ENST00000377918.8': 57725292.0}	{'ENST00000377918.8': 57729311.0}	{'ENST00000377918.8': '+'}	ENST00000377918.8	3UTR	protein_coding	74	chr13	57725292	57729311	+	['ENST00000377918.8']	['ENST00000377918.8']	ENST00000377918.8	3UTR	protein_coding	74	chr13	57725292	57729311	+	[]	['ENST00000377918.8']	ENST00000377918.8	3UTR	protein_coding	74	chr13	57725292	57729311	+	ENST00000377918.8	3UTR	protein_coding	74	chr13	57725292	57729311	+
Merged-chr13-77764229-1	chr13	77764192	77764266	+	0	{'ENST00000418532.6': '3UTR', 'ENST00000446759.6': '3UTR', 'ENST00000314070.9': '3UTR', 'ENST00000358679.3': '3UTR'}	{'ENST00000418532.6': 'protein_coding', 'ENST00000446759.6': 'protein_coding', 'ENST00000314070.9': 'protein_coding', 'ENST00000358679.3': 'protein_coding'}	{'ENST00000418532.6': 37, 'ENST00000446759.6': 26, 'ENST00000314070.9': 50, 'ENST00000358679.3': 35}	{'ENST00000418532.6': 'chr13', 'ENST00000446759.6': 'chr13', 'ENST00000314070.9': 'chr13', 'ENST00000358679.3': 'chr13'}	{'ENST00000418532.6': 77763218.0, 'ENST00000446759.6': 77763218.0, 'ENST00000314070.9': 77763218.0, 'ENST00000358679.3': 77763218.0}	{'ENST00000418532.6': 77764229.0, 'ENST00000446759.6': 77764218.0, 'ENST00000314070.9': 77764242.0, 'ENST00000358679.3': 77764227.0}	{'ENST00000418532.6': '+', 'ENST00000446759.6': '+', 'ENST00000314070.9': '+', 'ENST00000358679.3': '+'}	ENST00000314070.9	3UTR	protein_coding	50	chr13	77763218	77764242	+	['ENST00000418532.6', 'ENST00000446759.6', 'ENST00000314070.9', 'ENST00000358679.3']	['ENST00000418532.6']	ENST00000418532.6	3UTR	protein_coding	37	chr13	77763218	77764229	+	[]	['ENST00000418532.6', 'ENST00000446759.6', 'ENST00000314070.9', 'ENST00000358679.3']	ENST00000314070.9	3UTR	protein_coding	50	chr13	77763218	77764242	+	ENST00000418532.6	3UTR	protein_coding	37	chr13	77763218	77764229	+
Merged-chr13-78638868-1	chr13	78638831	78638905	-	0	{'ENST00000282003.7': 'exon'}	{'ENST00000282003.7': 'protein_coding'}	{'ENST00000282003.7': 74}	{'ENST00000282003.7': 'chr13'}	{'ENST00000282003.7': 78638823.0}	{'ENST00000282003.7': 78639071.0}	{'ENST00000282003.7': '-'}	ENST00000282003.7	exon	protein_coding	74	chr13	78638823	78639071	-	['ENST00000282003.7']	['ENST00000282003.7']	ENST00000282003.7	exon	protein_coding	74	chr13	78638823	78639071	-	[]	[]	ENST00000282003.7	exon	protein_coding	74	chr13	78638823	78639071	-	ENST00000282003.7	exon	protein_coding	74	chr13	78638823	78639071	-
Merged-chr13-83882263-1	chr13	83882226	83882300	-	0	{'ENST00000377084.3': '5UTR', 'ENST00000674365.1': 'exon', 'ENST00000667130.1': 'Intron', 'ENST00000649183.1': 'Intron'}	{'ENST00000377084.3': 'protein_coding', 'ENST00000674365.1': 'protein_coding', 'ENST00000667130.1': 'lncRNA', 'ENST00000649183.1': 'lncRNA'}	{'ENST00000377084.3': 74, 'ENST00000674365.1': 74, 'ENST00000667130.1': 74, 'ENST00000649183.1': 74}	{'ENST00000377084.3': 'chr13', 'ENST00000674365.1': 'chr13', 'ENST00000667130.1': 'chr13', 'ENST00000649183.1': 'chr13'}	{'ENST00000377084.3': 83881508.0, 'ENST00000674365.1': 83882004.0, 'ENST00000667130.1': 83878810.0, 'ENST00000649183.1': 83878810.0}	{'ENST00000377084.3': 83882393.0, 'ENST00000674365.1': 83882474.0, 'ENST00000667130.1': 83891310.0, 'ENST00000649183.1': 83886281.0}	{'ENST00000377084.3': '-', 'ENST00000674365.1': '-', 'ENST00000667130.1': '+', 'ENST00000649183.1': '+'}	ENST00000674365.1	exon	protein_coding	74	chr13	83882004	83882474	-	['ENST00000377084.3', 'ENST00000674365.1', 'ENST00000667130.1', 'ENST00000649183.1']	['ENST00000674365.1']	ENST00000674365.1	exon	protein_coding	74	chr13	83882004	83882474	-	['ENST00000377084.3']	[]	ENST00000674365.1	exon	protein_coding	74	chr13	83882004	83882474	-	ENST00000377084.3	5UTR	protein_coding	74	chr13	83881508	83882393	-
Merged-chr13-100015626-1	chr13	100015589	100015663	+	0	{'Intergenic': 'Unlabeled'}	{'Intergenic': 'Intergenic'}	{'Intergenic': 0}	{'Intergenic': nan}	{'Intergenic': nan}	{'Intergenic': nan}	{'Intergenic': '+'}	Intergenic	Unlabeled	Intergenic	0				+	['Intergenic']	[]	Intergenic	Unlabeled	Intergenic	0				+	[]	[]	Intergenic	Unlabeled	Intergenic	0				+	Intergenic	Unlabeled	Intergenic	0				+
Merged-chr9-128693962-1	chr9	128693925	128693999	+	0	{'ENST00000686840.1': 'exon', 'ENST00000372688.9': 'CDS'}	{'ENST00000686840.1': 'protein_coding', 'ENST00000372688.9': 'protein_coding'}	{'ENST00000686840.1': 74, 'ENST00000372688.9': 74}	{'ENST00000686840.1': 'chr9', 'ENST00000372688.9': 'chr9'}	{'ENST00000686840.1': 128693896.0, 'ENST00000372688.9': 128693896.0}	{'ENST00000686840.1': 128694042.0, 'ENST00000372688.9': 128694120.0}	{'ENST00000686840.1': '+', 'ENST00000372688.9': '+'}	ENST00000686840.1	exon	protein_coding	74	chr9	128693896	128694042	+	['ENST00000686840.1', 'ENST00000372688.9']	[]	ENST00000686840.1	exon	protein_coding	74	chr9	128693896	128694042	+	[]	[]	ENST00000686840.1	exon	protein_coding	74	chr9	128693896	128694042	+	ENST00000686840.1	exon	protein_coding	74	chr9	128693896	128694042	+
Merged-chr9-106863191-1	chr9	106863154	106863228	+	0	{'ENST00000277225.10': 'exon'}	{'ENST00000277225.10': 'protein_coding'}	{'ENST00000277225.10': 63}	{'ENST00000277225.10': 'chr9'}	{'ENST00000277225.10': 106863166.0}	{'ENST00000277225.10': 106863355.0}	{'ENST00000277225.10': '+'}	ENST00000277225.10	exon	protein_coding	63	chr9	106863166	106863355	+	['ENST00000277225.10']	['ENST00000277225.10']	ENST00000277225.10	exon	protein_coding	63	chr9	106863166	106863355	+	[]	[]	ENST00000277225.10	exon	protein_coding	63	chr9	106863166	106863355	+	ENST00000277225.10	exon	protein_coding	63	chr9	106863166	106863355	+
Merged-chr9-98012477-1	chr9	98012440	98012514	+	0	{'ENST00000339399.5': 'Intron'}	{'ENST00000339399.5': 'protein_coding'}	{'ENST00000339399.5': 43}	{'ENST00000339399.5': 'chr9'}	{'ENST00000339399.5': 98012472.0}	{'ENST00000339399.5': 98015363.0}	{'ENST00000339399.5': '+'}	ENST00000339399.5	Intron	protein_coding	43	chr9	98012472	98015363	+	['ENST00000339399.5']	['ENST00000339399.5']	ENST00000339399.5	Intron	protein_coding	43	chr9	98012472	98015363	+	[]	[]	ENST00000339399.5	Intron	protein_coding	43	chr9	98012472	98015363	+	ENST00000339399.5	Intron	protein_coding	43	chr9	98012472	98015363	+
Merged-chr9-136840199-1	chr9	136840162	136840236	+	0	{'ENST00000311502.12': 'Intron', 'ENST00000357466.6': 'Intron'}	{'ENST00000311502.12': 'protein_coding', 'ENST00000357466.6': 'protein_coding'}	{'ENST00000311502.12': 25, 'ENST00000357466.6': 74}	{'ENST00000311502.12': 'chr9', 'ENST00000357466.6': 'chr9'}	{'ENST00000311502.12': 136840212.0, 'ENST00000357466.6': 136837615.0}	{'ENST00000311502.12': 136840321.0, 'ENST00000357466.6': 136840484.0}	{'ENST00000311502.12': '+', 'ENST00000357466.6': '+'}	ENST00000357466.6	Intron	protein_coding	74	chr9	136837615	136840484	+	['ENST00000311502.12', 'ENST00000357466.6']	['ENST00000311502.12']	ENST00000311502.12	Intron	protein_coding	25	chr9	136840212	136840321	+	[]	[]	ENST00000311502.12	Intron	protein_coding	25	chr9	136840212	136840321	+	ENST00000311502.12	Intron	protein_coding	25	chr9	136840212	136840321	+
Merged-chr9-130236588-1	chr9	130236551	130236625	+	0	{'ENST00000372398.6': 'exon'}	{'ENST00000372398.6': 'protein_coding'}	{'ENST00000372398.6': 74}	{'ENST00000372398.6': 'chr9'}	{'ENST00000372398.6': 130232990.0}	{'ENST00000372398.6': 130237303.0}	{'ENST00000372398.6': '+'}	ENST00000372398.6	exon	protein_coding	74	chr9	130232990	130237303	+	['ENST00000372398.6']	['ENST00000372398.6']	ENST00000372398.6	exon	protein_coding	74	chr9	130232990	130237303	+	[]	[]	ENST00000372398.6	exon	protein_coding	74	chr9	130232990	130237303	+	ENST00000372398.6	exon	protein_coding	74	chr9	130232990	130237303	+
Merged-chr9-34521117-1	chr9	34521080	34521154	-	0	{'ENST00000399775.3': '3UTR'}	{'ENST00000399775.3': 'protein_coding'}	{'ENST00000399775.3': 74}	{'ENST00000399775.3': 'chr9'}	{'ENST00000399775.3': 34521043.0}	{'ENST00000399775.3': 34521467.0}	{'ENST00000399775.3': '-'}	ENST00000399775.3	3UTR	protein_coding	74	chr9	34521043	34521467	-	['ENST00000399775.3']	['ENST00000399775.3']	ENST00000399775.3	3UTR	protein_coding	74	chr9	34521043	34521467	-	[]	['ENST00000399775.3']	ENST00000399775.3	3UTR	protein_coding	74	chr9	34521043	34521467	-	ENST00000399775.3	3UTR	protein_coding	74	chr9	34521043	34521467	-
Merged-chr9-131496314-1	chr9	131496277	131496351	+	0	{'ENST00000684596.1': '3UTR', 'ENST00000683519.1': '3UTR', 'ENST00000682501.1': '3UTR'}	{'ENST00000684596.1': 'protein_coding', 'ENST00000683519.1': 'protein_coding', 'ENST00000682501.1': 'protein_coding'}	{'ENST00000684596.1': 74, 'ENST00000683519.1': 74, 'ENST00000682501.1': 74}	{'ENST00000684596.1': 'chr9', 'ENST00000683519.1': 'chr9', 'ENST00000682501.1': 'chr9'}	{'ENST00000684596.1': 131495872.0, 'ENST00000683519.1': 131495872.0, 'ENST00000682501.1': 131495872.0}	{'ENST00000684596.1': 131500171.0, 'ENST00000683519.1': 131500193.0, 'ENST00000682501.1': 131500197.0}	{'ENST00000684596.1': '+', 'ENST00000683519.1': '+', 'ENST00000682501.1': '+'}	ENST00000684596.1	3UTR	protein_coding	74	chr9	131495872	131500171	+	['ENST00000684596.1', 'ENST00000683519.1', 'ENST00000682501.1']	['ENST00000683519.1']	ENST00000683519.1	3UTR	protein_coding	74	chr9	131495872	131500193	+	[]	['ENST00000684596.1', 'ENST00000683519.1', 'ENST00000682501.1']	ENST00000684596.1	3UTR	protein_coding	74	chr9	131495872	131500171	+	ENST00000683519.1	3UTR	protein_coding	74	chr9	131495872	131500193	+
Merged-chr9-73170369-1	chr9	73170332	73170406	+	0	{'ENST00000257497.11': '3UTR'}	{'ENST00000257497.11': 'protein_coding'}	{'ENST00000257497.11': 61}	{'ENST00000257497.11': 'chr9'}	{'ENST00000257497.11': 73170105.0}	{'ENST00000257497.11': 73170393.0}	{'ENST00000257497.11': '+'}	ENST00000257497.11	3UTR	protein_coding	61	chr9	73170105	73170393	+	['ENST00000257497.11']	['ENST00000257497.11']	ENST00000257497.11	3UTR	protein_coding	61	chr9	73170105	73170393	+	[]	['ENST00000257497.11']	ENST00000257497.11	3UTR	protein_coding	61	chr9	73170105	73170393	+	ENST00000257497.11	3UTR	protein_coding	61	chr9	73170105	73170393	+
Merged-chr9-83968092-1	chr9	83968055	83968129	-	0	{'ENST00000704004.1': '3UTR', 'ENST00000704005.1': '3UTR'}	{'ENST00000704004.1': 'protein_coding', 'ENST00000704005.1': 'protein_coding'}	{'ENST00000704004.1': 47, 'ENST00000704005.1': 9}	{'ENST00000704004.1': 'chr9', 'ENST00000704005.1': 'chr9'}	{'ENST00000704004.1': 83968083.0, 'ENST00000704005.1': 83968121.0}	{'ENST00000704004.1': 83969409.0, 'ENST00000704005.1': 83969409.0}	{'ENST00000704004.1': '-', 'ENST00000704005.1': '-'}	ENST00000704004.1	3UTR	protein_coding	47	chr9	83968083	83969409	-	['ENST00000704004.1', 'ENST00000704005.1']	[]	ENST00000704004.1	3UTR	protein_coding	47	chr9	83968083	83969409	-	[]	['ENST00000704004.1', 'ENST00000704005.1']	ENST00000704004.1	3UTR	protein_coding	47	chr9	83968083	83969409	-	ENST00000704004.1	3UTR	protein_coding	47	chr9	83968083	83969409	-
Merged-chr9-15478482-1	chr9	15478445	15478519	-	0	{'ENST00000380733.9': 'Intron'}	{'ENST00000380733.9': 'protein_coding'}	{'ENST00000380733.9': 31}	{'ENST00000380733.9': 'chr9'}	{'ENST00000380733.9': 15474237.0}	{'ENST00000380733.9': 15478476.0}	{'ENST00000380733.9': '-'}	ENST00000380733.9	Intron	protein_coding	31	chr9	15474237	15478476	-	['ENST00000380733.9']	['ENST00000380733.9']	ENST00000380733.9	Intron	protein_coding	31	chr9	15474237	15478476	-	[]	[]	ENST00000380733.9	Intron	protein_coding	31	chr9	15474237	15478476	-	ENST00000380733.9	Intron	protein_coding	31	chr9	15474237	15478476	-
Merged-chr9-19049605-1	chr9	19049568	19049642	+	0	{'ENST00000380527.3': '5UTR'}	{'ENST00000380527.3': 'protein_coding'}	{'ENST00000380527.3': 74}	{'ENST00000380527.3': 'chr9'}	{'ENST00000380527.3': 19049427.0}	{'ENST00000380527.3': 19049659.0}	{'ENST00000380527.3': '+'}	ENST00000380527.3	5UTR	protein_coding	74	chr9	19049427	19049659	+	['ENST00000380527.3']	['ENST00000380527.3']	ENST00000380527.3	5UTR	protein_coding	74	chr9	19049427	19049659	+	['ENST00000380527.3']	[]	ENST00000380527.3	5UTR	protein_coding	74	chr9	19049427	19049659	+	ENST00000380527.3	5UTR	protein_coding	74	chr9	19049427	19049659	+
Merged-chr9-3372651-1	chr9	3372614	3372688	-	0	{'ENST00000382004.7': 'Intron'}	{'ENST00000382004.7': 'protein_coding'}	{'ENST00000382004.7': 74}	{'ENST00000382004.7': 'chr9'}	{'ENST00000382004.7': 3346764.0}	{'ENST00000382004.7': 3395471.0}	{'ENST00000382004.7': '-'}	ENST00000382004.7	Intron	protein_coding	74	chr9	3346764	3395471	-	['ENST00000382004.7']	[]	ENST00000382004.7	Intron	protein_coding	74	chr9	3346764	3395471	-	[]	[]	ENST00000382004.7	Intron	protein_coding	74	chr9	3346764	3395471	-	ENST00000382004.7	Intron	protein_coding	74	chr9	3346764	3395471	-
Merged-chr9-4712045-1	chr9	4712008	4712082	-	0	{'ENST00000381809.8': '3UTR', 'ENST00000611749.4': '3UTR', 'ENST00000359883.6': '3UTR'}	{'ENST00000381809.8': 'protein_coding', 'ENST00000611749.4': 'protein_coding', 'ENST00000359883.6': 'protein_coding'}	{'ENST00000381809.8': 74, 'ENST00000611749.4': 74, 'ENST00000359883.6': 38}	{'ENST00000381809.8': 'chr9', 'ENST00000611749.4': 'chr9', 'ENST00000359883.6': 'chr9'}	{'ENST00000381809.8': 4709556.0, 'ENST00000611749.4': 4709559.0, 'ENST00000359883.6': 4712045.0}	{'ENST00000381809.8': 4712978.0, 'ENST00000611749.4': 4712978.0, 'ENST00000359883.6': 4712978.0}	{'ENST00000381809.8': '-', 'ENST00000611749.4': '-', 'ENST00000359883.6': '-'}	ENST00000611749.4	3UTR	protein_coding	74	chr9	4709559	4712978	-	['ENST00000381809.8', 'ENST00000611749.4', 'ENST00000359883.6']	['ENST00000381809.8']	ENST00000381809.8	3UTR	protein_coding	74	chr9	4709556	4712978	-	[]	['ENST00000381809.8', 'ENST00000611749.4', 'ENST00000359883.6']	ENST00000381809.8	3UTR	protein_coding	74	chr9	4709556	4712978	-	ENST00000381809.8	3UTR	protein_coding	74	chr9	4709556	4712978	-
Merged-chr9-6836163-1	chr9	6836126	6836200	+	0	{'ENST00000536108.5': 'Intron'}	{'ENST00000536108.5': 'protein_coding'}	{'ENST00000536108.5': 74}	{'ENST00000536108.5': 'chr9'}	{'ENST00000536108.5': 6814745.0}	{'ENST00000536108.5': 6849506.0}	{'ENST00000536108.5': '+'}	ENST00000536108.5	Intron	protein_coding	74	chr9	6814745	6849506	+	['ENST00000536108.5']	[]	ENST00000536108.5	Intron	protein_coding	74	chr9	6814745	6849506	+	[]	[]	ENST00000536108.5	Intron	protein_coding	74	chr9	6814745	6849506	+	ENST00000536108.5	Intron	protein_coding	74	chr9	6814745	6849506	+
Merged-chr15-43765488-1	chr15	43765451	43765525	+	0	{'ENST00000686175.1': 'exon'}	{'ENST00000686175.1': 'protein_coding'}	{'ENST00000686175.1': 74}	{'ENST00000686175.1': 'chr15'}	{'ENST00000686175.1': 43765450.0}	{'ENST00000686175.1': 43765566.0}	{'ENST00000686175.1': '+'}	ENST00000686175.1	exon	protein_coding	74	chr15	43765450	43765566	+	['ENST00000686175.1']	[]	ENST00000686175.1	exon	protein_coding	74	chr15	43765450	43765566	+	[]	[]	ENST00000686175.1	exon	protein_coding	74	chr15	43765450	43765566	+	ENST00000686175.1	exon	protein_coding	74	chr15	43765450	43765566	+
Merged-chr15-56333181-1	chr15	56333144	56333218	+	0	{'ENSG00000151575.15': 'gene'}	{'ENSG00000151575.15': 'protein_coding'}	{'ENSG00000151575.15': 74}	{'ENSG00000151575.15': 'chr15'}	{'ENSG00000151575.15': 56243971.0}	{'ENSG00000151575.15': 56445997.0}	{'ENSG00000151575.15': '+'}	ENSG00000151575.15	gene	protein_coding	74	chr15	56243971	56445997	+	['ENSG00000151575.15']	[]	ENSG00000151575.15	gene	protein_coding	74	chr15	56243971	56445997	+	[]	[]	ENSG00000151575.15	gene	protein_coding	74	chr15	56243971	56445997	+	ENSG00000151575.15	gene	protein_coding	74	chr15	56243971	56445997	+
Merged-chr15-58595389-1	chr15	58595352	58595426	-	0	{'ENST00000260408.8': '3UTR'}	{'ENST00000260408.8': 'protein_coding'}	{'ENST00000260408.8': 74}	{'ENST00000260408.8': 'chr15'}	{'ENST00000260408.8': 58588809.0}	{'ENST00000260408.8': 58597549.0}	{'ENST00000260408.8': '-'}	ENST00000260408.8	3UTR	protein_coding	74	chr15	58588809	58597549	-	['ENST00000260408.8']	['ENST00000260408.8']	ENST00000260408.8	3UTR	protein_coding	74	chr15	58588809	58597549	-	[]	['ENST00000260408.8']	ENST00000260408.8	3UTR	protein_coding	74	chr15	58588809	58597549	-	ENST00000260408.8	3UTR	protein_coding	74	chr15	58588809	58597549	-
Merged-chr15-58854995-1	chr15	58854958	58855032	+	0	{'ENST00000559228.6': '3UTR', 'ENST00000450403.3': '3UTR'}	{'ENST00000559228.6': 'protein_coding', 'ENST00000450403.3': 'protein_coding'}	{'ENST00000559228.6': 74, 'ENST00000450403.3': 74}	{'ENST00000559228.6': 'chr15', 'ENST00000450403.3': 'chr15'}	{'ENST00000559228.6': 58854608.0, 'ENST00000450403.3': 58854608.0}	{'ENST00000559228.6': 58861900.0, 'ENST00000450403.3': 58857533.0}	{'ENST00000559228.6': '+', 'ENST00000450403.3': '+'}	ENST00000559228.6	3UTR	protein_coding	74	chr15	58854608	58861900	+	['ENST00000559228.6', 'ENST00000450403.3']	['ENST00000559228.6']	ENST00000559228.6	3UTR	protein_coding	74	chr15	58854608	58861900	+	[]	['ENST00000559228.6', 'ENST00000450403.3']	ENST00000559228.6	3UTR	protein_coding	74	chr15	58854608	58861900	+	ENST00000559228.6	3UTR	protein_coding	74	chr15	58854608	58861900	+
Merged-chr15-59031073-1	chr15	59031036	59031110	+	0	{'ENST00000348370.9': 'CDS'}	{'ENST00000348370.9': 'protein_coding'}	{'ENST00000348370.9': 74}	{'ENST00000348370.9': 'chr15'}	{'ENST00000348370.9': 59030823.0}	{'ENST00000348370.9': 59031702.0}	{'ENST00000348370.9': '+'}	ENST00000348370.9	CDS	protein_coding	74	chr15	59030823	59031702	+	['ENST00000348370.9']	['ENST00000348370.9']	ENST00000348370.9	CDS	protein_coding	74	chr15	59030823	59031702	+	[]	[]	ENST00000348370.9	CDS	protein_coding	74	chr15	59030823	59031702	+	ENST00000348370.9	CDS	protein_coding	74	chr15	59030823	59031702	+
Merged-chr15-65540008-1	chr15	65539971	65540045	+	0	{'ENST00000562901.5': 'Intron', 'ENST00000261875.10': 'Intron', 'ENST00000568793.5': 'Intron', 'ENST00000566074.5': 'Intron', 'ENST00000566511.5': 'Intron'}	{'ENST00000562901.5': 'protein_coding', 'ENST00000261875.10': 'protein_coding', 'ENST00000568793.5': 'protein_coding', 'ENST00000566074.5': 'protein_coding', 'ENST00000566511.5': 'protein_coding'}	{'ENST00000562901.5': 74, 'ENST00000261875.10': 74, 'ENST00000568793.5': 74, 'ENST00000566074.5': 74, 'ENST00000566511.5': 74}	{'ENST00000562901.5': 'chr15', 'ENST00000261875.10': 'chr15', 'ENST00000568793.5': 'chr15', 'ENST00000566074.5': 'chr15', 'ENST00000566511.5': 'chr15'}	{'ENST00000562901.5': 65535834.0, 'ENST00000261875.10': 65530718.0, 'ENST00000568793.5': 65530643.0, 'ENST00000566074.5': 65530833.0, 'ENST00000566511.5': 65531441.0}	{'ENST00000562901.5': 65551675.0, 'ENST00000261875.10': 65551675.0, 'ENST00000568793.5': 65551675.0, 'ENST00000566074.5': 65551675.0, 'ENST00000566511.5': 65551675.0}	{'ENST00000562901.5': '+', 'ENST00000261875.10': '+', 'ENST00000568793.5': '+', 'ENST00000566074.5': '+', 'ENST00000566511.5': '+'}	ENST00000562901.5	Intron	protein_coding	74	chr15	65535834	65551675	+	['ENST00000562901.5', 'ENST00000261875.10', 'ENST00000568793.5', 'ENST00000566074.5', 'ENST00000566511.5']	['ENST00000261875.10']	ENST00000261875.10	Intron	protein_coding	74	chr15	65530718	65551675	+	[]	[]	ENST00000261875.10	Intron	protein_coding	74	chr15	65530718	65551675	+	ENST00000261875.10	Intron	protein_coding	74	chr15	65530718	65551675	+
Merged-chr15-65889440-1	chr15	65889403	65889477	+	0	{'ENST00000261890.7': '3UTR'}	{'ENST00000261890.7': 'protein_coding'}	{'ENST00000261890.7': 74}	{'ENST00000261890.7': 'chr15'}	{'ENST00000261890.7': 65887838.0}	{'ENST00000261890.7': 65891989.0}	{'ENST00000261890.7': '+'}	ENST00000261890.7	3UTR	protein_coding	74	chr15	65887838	65891989	+	['ENST00000261890.7']	['ENST00000261890.7']	ENST00000261890.7	3UTR	protein_coding	74	chr15	65887838	65891989	+	[]	['ENST00000261890.7']	ENST00000261890.7	3UTR	protein_coding	74	chr15	65887838	65891989	+	ENST00000261890.7	3UTR	protein_coding	74	chr15	65887838	65891989	+
Merged-chr15-75049733-1	chr15	75049696	75049770	+	0	{'ENST00000342932.8': '3UTR', 'ENST00000563393.1': '3UTR'}	{'ENST00000342932.8': 'protein_coding', 'ENST00000563393.1': 'protein_coding'}	{'ENST00000342932.8': 74, 'ENST00000563393.1': 42}	{'ENST00000342932.8': 'chr15', 'ENST00000563393.1': 'chr15'}	{'ENST00000342932.8': 75049233.0, 'ENST00000563393.1': 75049233.0}	{'ENST00000342932.8': 75050726.0, 'ENST00000563393.1': 75049738.0}	{'ENST00000342932.8': '+', 'ENST00000563393.1': '+'}	ENST00000342932.8	3UTR	protein_coding	74	chr15	75049233	75050726	+	['ENST00000342932.8', 'ENST00000563393.1']	['ENST00000342932.8']	ENST00000342932.8	3UTR	protein_coding	74	chr15	75049233	75050726	+	[]	['ENST00000342932.8', 'ENST00000563393.1']	ENST00000342932.8	3UTR	protein_coding	74	chr15	75049233	75050726	+	ENST00000342932.8	3UTR	protein_coding	74	chr15	75049233	75050726	+
Merged-chr15-79919133-1	chr15	79919096	79919170	-	0	{'ENST00000615374.5': 'Intron', 'ENST00000479961.1': 'Intron'}	{'ENST00000615374.5': 'protein_coding', 'ENST00000479961.1': 'protein_coding'}	{'ENST00000615374.5': 74, 'ENST00000479961.1': 74}	{'ENST00000615374.5': 'chr15', 'ENST00000479961.1': 'chr15'}	{'ENST00000615374.5': 79907684.0, 'ENST00000479961.1': 79907684.0}	{'ENST00000615374.5': 79923038.0, 'ENST00000479961.1': 79923451.0}	{'ENST00000615374.5': '-', 'ENST00000479961.1': '-'}	ENST00000615374.5	Intron	protein_coding	74	chr15	79907684	79923038	-	['ENST00000615374.5', 'ENST00000479961.1']	[]	ENST00000615374.5	Intron	protein_coding	74	chr15	79907684	79923038	-	[]	[]	ENST00000615374.5	Intron	protein_coding	74	chr15	79907684	79923038	-	ENST00000615374.5	Intron	protein_coding	74	chr15	79907684	79923038	-
Merged-chr15-83029951-1	chr15	83029914	83029988	+	0	{'ENST00000261721.9': 'Intron', 'ENST00000379403.2': 'Intron', 'ENST00000570202.1': 'Intron', 'ENST00000568441.1': 'Intron', 'ENST00000566841.1': 'Intron'}	{'ENST00000261721.9': 'protein_coding', 'ENST00000379403.2': 'protein_coding', 'ENST00000570202.1': 'lncRNA', 'ENST00000568441.1': 'lncRNA', 'ENST00000566841.1': 'lncRNA'}	{'ENST00000261721.9': 74, 'ENST00000379403.2': 74, 'ENST00000570202.1': 74, 'ENST00000568441.1': 74, 'ENST00000566841.1': 74}	{'ENST00000261721.9': 'chr15', 'ENST00000379403.2': 'chr15', 'ENST00000570202.1': 'chr15', 'ENST00000568441.1': 'chr15', 'ENST00000566841.1': 'chr15'}	{'ENST00000261721.9': 83020762.0, 'ENST00000379403.2': 83018853.0, 'ENST00000570202.1': 83012722.0, 'ENST00000568441.1': 83022607.0, 'ENST00000566841.1': 82926617.0}	{'ENST00000261721.9': 83030135.0, 'ENST00000379403.2': 83030135.0, 'ENST00000570202.1': 83061486.0, 'ENST00000568441.1': 83090320.0, 'ENST00000566841.1': 83103423.0}	{'ENST00000261721.9': '-', 'ENST00000379403.2': '-', 'ENST00000570202.1': '+', 'ENST00000568441.1': '+', 'ENST00000566841.1': '+'}	ENST00000568441.1	Intron	lncRNA	74	chr15	83022607	83090320	+	['ENST00000261721.9', 'ENST00000379403.2', 'ENST00000570202.1', 'ENST00000568441.1', 'ENST00000566841.1']	['ENST00000261721.9']	ENST00000261721.9	Intron	protein_coding	74	chr15	83020762	83030135	-	[]	[]	ENST00000261721.9	Intron	protein_coding	74	chr15	83020762	83030135	-	ENST00000261721.9	Intron	protein_coding	74	chr15	83020762	83030135	-
Merged-chr15-85808161-1	chr15	85808124	85808198	-	0	{'Intergenic': 'Unlabeled'}	{'Intergenic': 'Intergenic'}	{'Intergenic': 0}	{'Intergenic': nan}	{'Intergenic': nan}	{'Intergenic': nan}	{'Intergenic': '-'}	Intergenic	Unlabeled	Intergenic	0				-	['Intergenic']	[]	Intergenic	Unlabeled	Intergenic	0				-	[]	[]	Intergenic	Unlabeled	Intergenic	0				-	Intergenic	Unlabeled	Intergenic	0				-
Merged-chr15-99249421-1	chr15	99249384	99249458	-	0	{'ENST00000394132.7': 'exon', 'ENST00000394135.7': 'exon', 'ENST00000394129.6': 'Intron', 'ENST00000558663.5': 'Intron'}	{'ENST00000394132.7': 'protein_coding', 'ENST00000394135.7': 'protein_coding', 'ENST00000394129.6': 'protein_coding', 'ENST00000558663.5': 'protein_coding'}	{'ENST00000394132.7': 74, 'ENST00000394135.7': 74, 'ENST00000394129.6': 74, 'ENST00000558663.5': 74}	{'ENST00000394132.7': 'chr15', 'ENST00000394135.7': 'chr15', 'ENST00000394129.6': 'chr15', 'ENST00000558663.5': 'chr15'}	{'ENST00000394132.7': 99249171.0, 'ENST00000394135.7': 99249171.0, 'ENST00000394129.6': 99245510.0, 'ENST00000558663.5': 99228732.0}	{'ENST00000394132.7': 99249581.0, 'ENST00000394135.7': 99249799.0, 'ENST00000394129.6': 99249621.0, 'ENST00000558663.5': 99249621.0}	{'ENST00000394132.7': '-', 'ENST00000394135.7': '-', 'ENST00000394129.6': '-', 'ENST00000558663.5': '-'}	ENST00000394132.7	exon	protein_coding	74	chr15	99249171	99249581	-	['ENST00000394132.7', 'ENST00000394135.7', 'ENST00000394129.6', 'ENST00000558663.5']	['ENST00000394132.7']	ENST00000394132.7	exon	protein_coding	74	chr15	99249171	99249581	-	[]	[]	ENST00000394132.7	exon	protein_coding	74	chr15	99249171	99249581	-	ENST00000394132.7	exon	protein_coding	74	chr15	99249171	99249581	-
Merged-chr15-24997295-1	chr15	24997258	24997332	+	0	{'ENST00000551312.6': 'Intron', 'ENST00000551631.7': 'Intron'}	{'ENST00000551312.6': 'protein_coding', 'ENST00000551631.7': 'lncRNA'}	{'ENST00000551312.6': 74, 'ENST00000551631.7': 74}	{'ENST00000551312.6': 'chr15', 'ENST00000551631.7': 'chr15'}	{'ENST00000551312.6': 24982437.0, 'ENST00000551631.7': 24982437.0}	{'ENST00000551312.6': 24998969.0, 'ENST00000551631.7': 24998365.0}	{'ENST00000551312.6': '+', 'ENST00000551631.7': '+'}	ENST00000551312.6	Intron	protein_coding	74	chr15	24982437	24998969	+	['ENST00000551312.6', 'ENST00000551631.7']	[]	ENST00000551312.6	Intron	protein_coding	74	chr15	24982437	24998969	+	[]	[]	ENST00000551312.6	Intron	protein_coding	74	chr15	24982437	24998969	+	ENST00000551312.6	Intron	protein_coding	74	chr15	24982437	24998969	+
Merged-chr15-40625563-1	chr15	40625526	40625600	+	0	{'ENST00000346991.9': 'exon'}	{'ENST00000346991.9': 'protein_coding'}	{'ENST00000346991.9': 74}	{'ENST00000346991.9': 'chr15'}	{'ENST00000346991.9': 40620640.0}	{'ENST00000346991.9': 40625640.0}	{'ENST00000346991.9': '+'}	ENST00000346991.9	exon	protein_coding	74	chr15	40620640	40625640	+	['ENST00000346991.9']	[]	ENST00000346991.9	exon	protein_coding	74	chr15	40620640	40625640	+	[]	[]	ENST00000346991.9	exon	protein_coding	74	chr15	40620640	40625640	+	ENST00000346991.9	exon	protein_coding	74	chr15	40620640	40625640	+
Merged-chr15-41284111-1	chr15	41284074	41284148	+	0	{'ENST00000707007.1': 'exon', 'ENST00000558457.6': 'exon', 'ENST00000707056.1': 'exon', 'ENST00000561275.6': 'exon', 'ENST00000707010.1': 'exon', 'ENST00000558945.6': 'exon', 'ENST00000707046.1': 'exon', 'ENST00000707057.1': 'exon', 'ENST00000707042.1': 'exon', 'ENST00000707052.1': 'exon', 'ENST00000707008.1': 'exon', 'ENST00000500949.7': 'Intron'}	{'ENST00000707007.1': 'lncRNA', 'ENST00000558457.6': 'lncRNA', 'ENST00000707056.1': 'lncRNA', 'ENST00000561275.6': 'lncRNA', 'ENST00000707010.1': 'lncRNA', 'ENST00000558945.6': 'lncRNA', 'ENST00000707046.1': 'lncRNA', 'ENST00000707057.1': 'lncRNA', 'ENST00000707042.1': 'lncRNA', 'ENST00000707052.1': 'lncRNA', 'ENST00000707008.1': 'lncRNA', 'ENST00000500949.7': 'lncRNA'}	{'ENST00000707007.1': 36, 'ENST00000558457.6': 36, 'ENST00000707056.1': 36, 'ENST00000561275.6': 36, 'ENST00000707010.1': 36, 'ENST00000558945.6': 74, 'ENST00000707046.1': 74, 'ENST00000707057.1': 36, 'ENST00000707042.1': 36, 'ENST00000707052.1': 36, 'ENST00000707008.1': 36, 'ENST00000500949.7': 39}	{'ENST00000707007.1': 'chr15', 'ENST00000558457.6': 'chr15', 'ENST00000707056.1': 'chr15', 'ENST00000561275.6': 'chr15', 'ENST00000707010.1': 'chr15', 'ENST00000558945.6': 'chr15', 'ENST00000707046.1': 'chr15', 'ENST00000707057.1': 'chr15', 'ENST00000707042.1': 'chr15', 'ENST00000707052.1': 'chr15', 'ENST00000707008.1': 'chr15', 'ENST00000500949.7': 'chr15'}	{'ENST00000707007.1': 41283961.0, 'ENST00000558457.6': 41283965.0, 'ENST00000707056.1': 41283972.0, 'ENST00000561275.6': 41283988.0, 'ENST00000707010.1': 41283990.0, 'ENST00000558945.6': 41283990.0, 'ENST00000707046.1': 41283997.0, 'ENST00000707057.1': 41284005.0, 'ENST00000707042.1': 41284007.0, 'ENST00000707052.1': 41284008.0, 'ENST00000707008.1': 41284009.0, 'ENST00000500949.7': 41284110.0}	{'ENST00000707007.1': 41284110.0, 'ENST00000558457.6': 41284110.0, 'ENST00000707056.1': 41284110.0, 'ENST00000561275.6': 41284110.0, 'ENST00000707010.1': 41284110.0, 'ENST00000558945.6': 41284288.0, 'ENST00000707046.1': 41284288.0, 'ENST00000707057.1': 41284110.0, 'ENST00000707042.1': 41284110.0, 'ENST00000707052.1': 41284110.0, 'ENST00000707008.1': 41284110.0, 'ENST00000500949.7': 41285224.0}	{'ENST00000707007.1': '+', 'ENST00000558457.6': '+', 'ENST00000707056.1': '+', 'ENST00000561275.6': '+', 'ENST00000707010.1': '+', 'ENST00000558945.6': '+', 'ENST00000707046.1': '+', 'ENST00000707057.1': '+', 'ENST00000707042.1': '+', 'ENST00000707052.1': '+', 'ENST00000707008.1': '+', 'ENST00000500949.7': '+'}	ENST00000707046.1	exon	lncRNA	74	chr15	41283997	41284288	+	['ENST00000707007.1', 'ENST00000558457.6', 'ENST00000707056.1', 'ENST00000561275.6', 'ENST00000707010.1', 'ENST00000558945.6', 'ENST00000707046.1', 'ENST00000707057.1', 'ENST00000707042.1', 'ENST00000707052.1', 'ENST00000707008.1', 'ENST00000500949.7']	[]	ENST00000707046.1	exon	lncRNA	74	chr15	41283997	41284288	+	[]	[]	ENST00000707046.1	exon	lncRNA	74	chr15	41283997	41284288	+	ENST00000707046.1	exon	lncRNA	74	chr15	41283997	41284288	+
Merged-chr15-50303561-1	chr15	50303524	50303598	+	0	{'ENST00000380877.8': 'Intron'}	{'ENST00000380877.8': 'protein_coding'}	{'ENST00000380877.8': 74}	{'ENST00000380877.8': 'chr15'}	{'ENST00000380877.8': 50303123.0}	{'ENST00000380877.8': 50303965.0}	{'ENST00000380877.8': '-'}	ENST00000380877.8	Intron	protein_coding	74	chr15	50303123	50303965	-	['ENST00000380877.8']	['ENST00000380877.8']	ENST00000380877.8	Intron	protein_coding	74	chr15	50303123	50303965	-	[]	[]	ENST00000380877.8	Intron	protein_coding	74	chr15	50303123	50303965	-	ENST00000380877.8	Intron	protein_coding	74	chr15	50303123	50303965	-
Merged-chr15-60397932-1	chr15	60397895	60397969	-	0	{'ENST00000558985.6': 'exon', 'ENST00000332680.8': '5UTR', 'ENST00000677968.1': 'Intron', 'ENST00000678450.1': 'Intron', 'ENST00000558558.6': 'Intron', 'ENST00000396024.7': 'Intron', 'ENST00000679109.1': 'Intron', 'ENST00000559818.6': 'Intron', 'ENST00000451270.7': 'Intron'}	{'ENST00000558985.6': 'protein_coding', 'ENST00000332680.8': 'protein_coding', 'ENST00000677968.1': 'protein_coding', 'ENST00000678450.1': 'protein_coding', 'ENST00000558558.6': 'protein_coding', 'ENST00000396024.7': 'protein_coding', 'ENST00000679109.1': 'protein_coding', 'ENST00000559818.6': 'protein_coding', 'ENST00000451270.7': 'protein_coding'}	{'ENST00000558985.6': 27, 'ENST00000332680.8': 56, 'ENST00000677968.1': 47, 'ENST00000678450.1': 47, 'ENST00000558558.6': 47, 'ENST00000396024.7': 47, 'ENST00000679109.1': 74, 'ENST00000559818.6': 74, 'ENST00000451270.7': 47}	{'ENST00000558985.6': 'chr15', 'ENST00000332680.8': 'chr15', 'ENST00000677968.1': 'chr15', 'ENST00000678450.1': 'chr15', 'ENST00000558558.6': 'chr15', 'ENST00000396024.7': 'chr15', 'ENST00000679109.1': 'chr15', 'ENST00000559818.6': 'chr15', 'ENST00000451270.7': 'chr15'}	{'ENST00000558985.6': 60397943.0, 'ENST00000332680.8': 60397914.0, 'ENST00000677968.1': 60393440.0, 'ENST00000678450.1': 60397338.0, 'ENST00000558558.6': 60396427.0, 'ENST00000396024.7': 60390317.0, 'ENST00000679109.1': 60386086.0, 'ENST00000559818.6': 60386086.0, 'ENST00000451270.7': 60386086.0}	{'ENST00000558985.6': 60398033.0, 'ENST00000332680.8': 60397985.0, 'ENST00000677968.1': 60397942.0, 'ENST00000678450.1': 60397942.0, 'ENST00000558558.6': 60397942.0, 'ENST00000396024.7': 60397942.0, 'ENST00000679109.1': 60398114.0, 'ENST00000559818.6': 60398644.0, 'ENST00000451270.7': 60397942.0}	{'ENST00000558985.6': '-', 'ENST00000332680.8': '-', 'ENST00000677968.1': '-', 'ENST00000678450.1': '-', 'ENST00000558558.6': '-', 'ENST00000396024.7': '-', 'ENST00000679109.1': '-', 'ENST00000559818.6': '-', 'ENST00000451270.7': '-'}	ENST00000679109.1	Intron	protein_coding	74	chr15	60386086	60398114	-	['ENST00000558985.6', 'ENST00000332680.8', 'ENST00000677968.1', 'ENST00000678450.1', 'ENST00000558558.6', 'ENST00000396024.7', 'ENST00000679109.1', 'ENST00000559818.6', 'ENST00000451270.7']	['ENST00000451270.7']	ENST00000451270.7	Intron	protein_coding	47	chr15	60386086	60397942	-	['ENST00000332680.8']	[]	ENST00000451270.7	Intron	protein_coding	47	chr15	60386086	60397942	-	ENST00000332680.8	5UTR	protein_coding	56	chr15	60397914	60397985	-
Merged-chr15-68293693-1	chr15	68293656	68293730	+	0	{'ENST00000306917.5': '3UTR'}	{'ENST00000306917.5': 'protein_coding'}	{'ENST00000306917.5': 74}	{'ENST00000306917.5': 'chr15'}	{'ENST00000306917.5': 68291240.0}	{'ENST00000306917.5': 68295862.0}	{'ENST00000306917.5': '+'}	ENST00000306917.5	3UTR	protein_coding	74	chr15	68291240	68295862	+	['ENST00000306917.5']	['ENST00000306917.5']	ENST00000306917.5	3UTR	protein_coding	74	chr15	68291240	68295862	+	[]	['ENST00000306917.5']	ENST00000306917.5	3UTR	protein_coding	74	chr15	68291240	68295862	+	ENST00000306917.5	3UTR	protein_coding	74	chr15	68291240	68295862	+
Merged-chr15-71926123-1	chr15	71926086	71926160	-	0	{'ENST00000356056.10': 'Intron'}	{'ENST00000356056.10': 'protein_coding'}	{'ENST00000356056.10': 74}	{'ENST00000356056.10': 'chr15'}	{'ENST00000356056.10': 71916492.0}	{'ENST00000356056.10': 71933669.0}	{'ENST00000356056.10': '-'}	ENST00000356056.10	Intron	protein_coding	74	chr15	71916492	71933669	-	['ENST00000356056.10']	['ENST00000356056.10']	ENST00000356056.10	Intron	protein_coding	74	chr15	71916492	71933669	-	[]	[]	ENST00000356056.10	Intron	protein_coding	74	chr15	71916492	71933669	-	ENST00000356056.10	Intron	protein_coding	74	chr15	71916492	71933669	-
Merged-chr15-72208673-1	chr15	72208636	72208710	-	0	{'ENST00000335181.10': 'exon'}	{'ENST00000335181.10': 'protein_coding'}	{'ENST00000335181.10': 74}	{'ENST00000335181.10': 'chr15'}	{'ENST00000335181.10': 72208621.0}	{'ENST00000335181.10': 72208891.0}	{'ENST00000335181.10': '-'}	ENST00000335181.10	exon	protein_coding	74	chr15	72208621	72208891	-	['ENST00000335181.10']	['ENST00000335181.10']	ENST00000335181.10	exon	protein_coding	74	chr15	72208621	72208891	-	[]	[]	ENST00000335181.10	exon	protein_coding	74	chr15	72208621	72208891	-	ENST00000335181.10	exon	protein_coding	74	chr15	72208621	72208891	-
Merged-chr15-76286417-1	chr15	76286380	76286454	-	0	{'ENST00000557943.6': 'exon', 'ENST00000688908.1': 'exon'}	{'ENST00000557943.6': 'protein_coding', 'ENST00000688908.1': 'protein_coding'}	{'ENST00000557943.6': 74, 'ENST00000688908.1': 74}	{'ENST00000557943.6': 'chr15', 'ENST00000688908.1': 'chr15'}	{'ENST00000557943.6': 76286371.0, 'ENST00000688908.1': 76286371.0}	{'ENST00000557943.6': 76286481.0, 'ENST00000688908.1': 76286463.0}	{'ENST00000557943.6': '-', 'ENST00000688908.1': '-'}	ENST00000557943.6	exon	protein_coding	74	chr15	76286371	76286481	-	['ENST00000557943.6', 'ENST00000688908.1']	['ENST00000557943.6']	ENST00000557943.6	exon	protein_coding	74	chr15	76286371	76286481	-	[]	[]	ENST00000557943.6	exon	protein_coding	74	chr15	76286371	76286481	-	ENST00000557943.6	exon	protein_coding	74	chr15	76286371	76286481	-
Merged-chr15-77480508-1	chr15	77480471	77480545	+	0	{'ENST00000381714.7': 'Intron'}	{'ENST00000381714.7': 'protein_coding'}	{'ENST00000381714.7': 74}	{'ENST00000381714.7': 'chr15'}	{'ENST00000381714.7': 77479321.0}	{'ENST00000381714.7': 77482969.0}	{'ENST00000381714.7': '+'}	ENST00000381714.7	Intron	protein_coding	74	chr15	77479321	77482969	+	['ENST00000381714.7']	[]	ENST00000381714.7	Intron	protein_coding	74	chr15	77479321	77482969	+	[]	[]	ENST00000381714.7	Intron	protein_coding	74	chr15	77479321	77482969	+	ENST00000381714.7	Intron	protein_coding	74	chr15	77479321	77482969	+
Merged-chr15-84669738-1	chr15	84669701	84669775	-	0	{'ENST00000559729.5': '3UTR', 'ENST00000558134.5': '3UTR', 'ENST00000268220.12': '3UTR', 'ENST00000455959.7': '3UTR'}	{'ENST00000559729.5': 'protein_coding', 'ENST00000558134.5': 'protein_coding', 'ENST00000268220.12': 'protein_coding', 'ENST00000455959.7': 'protein_coding'}	{'ENST00000559729.5': 74, 'ENST00000558134.5': 74, 'ENST00000268220.12': 74, 'ENST00000455959.7': 74}	{'ENST00000559729.5': 'chr15', 'ENST00000558134.5': 'chr15', 'ENST00000268220.12': 'chr15', 'ENST00000455959.7': 'chr15'}	{'ENST00000559729.5': 84669538.0, 'ENST00000558134.5': 84669544.0, 'ENST00000268220.12': 84669544.0, 'ENST00000455959.7': 84669560.0}	{'ENST00000559729.5': 84670021.0, 'ENST00000558134.5': 84669945.0, 'ENST00000268220.12': 84670021.0, 'ENST00000455959.7': 84670021.0}	{'ENST00000559729.5': '-', 'ENST00000558134.5': '-', 'ENST00000268220.12': '-', 'ENST00000455959.7': '-'}	ENST00000455959.7	3UTR	protein_coding	74	chr15	84669560	84670021	-	['ENST00000559729.5', 'ENST00000558134.5', 'ENST00000268220.12', 'ENST00000455959.7']	['ENST00000268220.12']	ENST00000268220.12	3UTR	protein_coding	74	chr15	84669544	84670021	-	[]	['ENST00000559729.5', 'ENST00000558134.5', 'ENST00000268220.12', 'ENST00000455959.7']	ENST00000559729.5	3UTR	protein_coding	74	chr15	84669538	84670021	-	ENST00000268220.12	3UTR	protein_coding	74	chr15	84669544	84670021	-
Merged-chr15-89850743-1	chr15	89850706	89850780	-	0	{'ENST00000578766.1': 'exon', 'ENST00000336418.9': 'Intron'}	{'ENST00000578766.1': 'miRNA', 'ENST00000336418.9': 'protein_coding'}	{'ENST00000578766.1': 15, 'ENST00000336418.9': 74}	{'ENST00000578766.1': 'chr15', 'ENST00000336418.9': 'chr15'}	{'ENST00000578766.1': 89850637.0, 'ENST00000336418.9': 89837722.0}	{'ENST00000578766.1': 89850721.0, 'ENST00000336418.9': 89871474.0}	{'ENST00000578766.1': '-', 'ENST00000336418.9': '-'}	ENST00000336418.9	Intron	protein_coding	74	chr15	89837722	89871474	-	['ENST00000578766.1', 'ENST00000336418.9']	['ENST00000336418.9']	ENST00000336418.9	Intron	protein_coding	74	chr15	89837722	89871474	-	[]	[]	ENST00000336418.9	Intron	protein_coding	74	chr15	89837722	89871474	-	ENST00000336418.9	Intron	protein_coding	74	chr15	89837722	89871474	-
Merged-chr15-89901532-1	chr15	89901495	89901569	-	0	{'ENST00000460685.1': '3UTR', 'ENST00000357484.10': '3UTR', 'ENST00000398333.7': 'Intron'}	{'ENST00000460685.1': 'protein_coding', 'ENST00000357484.10': 'protein_coding', 'ENST00000398333.7': 'protein_coding'}	{'ENST00000460685.1': 74, 'ENST00000357484.10': 74, 'ENST00000398333.7': 74}	{'ENST00000460685.1': 'chr15', 'ENST00000357484.10': 'chr15', 'ENST00000398333.7': 'chr15'}	{'ENST00000460685.1': 89900875.0, 'ENST00000357484.10': 89895006.0, 'ENST00000398333.7': 89889140.0}	{'ENST00000460685.1': 89901797.0, 'ENST00000357484.10': 89901797.0, 'ENST00000398333.7': 89903215.0}	{'ENST00000460685.1': '-', 'ENST00000357484.10': '-', 'ENST00000398333.7': '-'}	ENST00000460685.1	3UTR	protein_coding	74	chr15	89900875	89901797	-	['ENST00000460685.1', 'ENST00000357484.10', 'ENST00000398333.7']	['ENST00000357484.10']	ENST00000357484.10	3UTR	protein_coding	74	chr15	89895006	89901797	-	[]	['ENST00000460685.1', 'ENST00000357484.10']	ENST00000460685.1	3UTR	protein_coding	74	chr15	89900875	89901797	-	ENST00000357484.10	3UTR	protein_coding	74	chr15	89895006	89901797	-
Merged-chr15-99633101-1	chr15	99633064	99633138	+	0	{'ENST00000354410.9': 'AltUTR'}	{'ENST00000354410.9': 'protein_coding'}	{'ENST00000354410.9': 55}	{'ENST00000354410.9': 'chr15'}	{'ENST00000354410.9': 99632978.0}	{'ENST00000354410.9': 99633119.0}	{'ENST00000354410.9': '+'}	ENST00000354410.9	AltUTR	protein_coding	55	chr15	99632978	99633119	+	['ENST00000354410.9']	[]	ENST00000354410.9	AltUTR	protein_coding	55	chr15	99632978	99633119	+	[]	[]	ENST00000354410.9	AltUTR	protein_coding	55	chr15	99632978	99633119	+	ENST00000354410.9	AltUTR	protein_coding	55	chr15	99632978	99633119	+
Merged-chr15-99716368-1	chr15	99716331	99716405	+	0	{'ENST00000378904.4': '3UTR', 'ENST00000354410.9': '3UTR', 'ENST00000338042.11': '3UTR', 'ENST00000449277.6': '3UTR'}	{'ENST00000378904.4': 'protein_coding', 'ENST00000354410.9': 'protein_coding', 'ENST00000338042.11': 'protein_coding', 'ENST00000449277.6': 'protein_coding'}	{'ENST00000378904.4': 73, 'ENST00000354410.9': 74, 'ENST00000338042.11': 74, 'ENST00000449277.6': 74}	{'ENST00000378904.4': 'chr15', 'ENST00000354410.9': 'chr15', 'ENST00000338042.11': 'chr15', 'ENST00000449277.6': 'chr15'}	{'ENST00000378904.4': 99715703.0, 'ENST00000354410.9': 99712769.0, 'ENST00000338042.11': 99712769.0, 'ENST00000449277.6': 99712769.0}	{'ENST00000378904.4': 99716404.0, 'ENST00000354410.9': 99716466.0, 'ENST00000338042.11': 99716488.0, 'ENST00000449277.6': 99716406.0}	{'ENST00000378904.4': '-', 'ENST00000354410.9': '+', 'ENST00000338042.11': '+', 'ENST00000449277.6': '+'}	ENST00000354410.9	3UTR	protein_coding	74	chr15	99712769	99716466	+	['ENST00000378904.4', 'ENST00000354410.9', 'ENST00000338042.11', 'ENST00000449277.6']	[]	ENST00000354410.9	3UTR	protein_coding	74	chr15	99712769	99716466	+	[]	['ENST00000378904.4', 'ENST00000354410.9', 'ENST00000338042.11', 'ENST00000449277.6']	ENST00000354410.9	3UTR	protein_coding	74	chr15	99712769	99716466	+	ENST00000354410.9	3UTR	protein_coding	74	chr15	99712769	99716466	+
Merged-chr5-179730645-1	chr5	179730608	179730682	+	0	{'ENST00000681674.1': '3UTR', 'ENST00000680406.1': '3UTR', 'ENST00000502296.6': '3UTR', 'ENST00000680812.1': '3UTR', 'ENST00000681265.1': '3UTR', 'ENST00000681894.1': '3UTR', 'ENST00000679642.1': '3UTR', 'ENST00000247461.9': '3UTR'}	{'ENST00000681674.1': 'protein_coding', 'ENST00000680406.1': 'protein_coding', 'ENST00000502296.6': 'protein_coding', 'ENST00000680812.1': 'protein_coding', 'ENST00000681265.1': 'protein_coding', 'ENST00000681894.1': 'protein_coding', 'ENST00000679642.1': 'protein_coding', 'ENST00000247461.9': 'protein_coding'}	{'ENST00000681674.1': 74, 'ENST00000680406.1': 74, 'ENST00000502296.6': 74, 'ENST00000680812.1': 74, 'ENST00000681265.1': 74, 'ENST00000681894.1': 74, 'ENST00000679642.1': 74, 'ENST00000247461.9': 74}	{'ENST00000681674.1': 'chr5', 'ENST00000680406.1': 'chr5', 'ENST00000502296.6': 'chr5', 'ENST00000680812.1': 'chr5', 'ENST00000681265.1': 'chr5', 'ENST00000681894.1': 'chr5', 'ENST00000679642.1': 'chr5', 'ENST00000247461.9': 'chr5'}	{'ENST00000681674.1': 179728642.0, 'ENST00000680406.1': 179728642.0, 'ENST00000502296.6': 179728642.0, 'ENST00000680812.1': 179728596.0, 'ENST00000681265.1': 179728604.0, 'ENST00000681894.1': 179728642.0, 'ENST00000679642.1': 179728642.0, 'ENST00000247461.9': 179728642.0}	{'ENST00000681674.1': 179731622.0, 'ENST00000680406.1': 179731453.0, 'ENST00000502296.6': 179730925.0, 'ENST00000680812.1': 179730919.0, 'ENST00000681265.1': 179731453.0, 'ENST00000681894.1': 179731517.0, 'ENST00000679642.1': 179731620.0, 'ENST00000247461.9': 179731641.0}	{'ENST00000681674.1': '+', 'ENST00000680406.1': '+', 'ENST00000502296.6': '+', 'ENST00000680812.1': '+', 'ENST00000681265.1': '+', 'ENST00000681894.1': '+', 'ENST00000679642.1': '+', 'ENST00000247461.9': '+'}	ENST00000681674.1	3UTR	protein_coding	74	chr5	179728642	179731622	+	['ENST00000681674.1', 'ENST00000680406.1', 'ENST00000502296.6', 'ENST00000680812.1', 'ENST00000681265.1', 'ENST00000681894.1', 'ENST00000679642.1', 'ENST00000247461.9']	['ENST00000247461.9']	ENST00000247461.9	3UTR	protein_coding	74	chr5	179728642	179731641	+	[]	['ENST00000681674.1', 'ENST00000680406.1', 'ENST00000502296.6', 'ENST00000680812.1', 'ENST00000681265.1', 'ENST00000681894.1', 'ENST00000679642.1', 'ENST00000247461.9']	ENST00000681674.1	3UTR	protein_coding	74	chr5	179728642	179731622	+	ENST00000247461.9	3UTR	protein_coding	74	chr5	179728642	179731641	+
Merged-chr5-139325480-1	chr5	139325443	139325517	+	0	{'ENST00000509990.5': 'exon', 'ENST00000502929.5': 'exon'}	{'ENST00000509990.5': 'protein_coding', 'ENST00000502929.5': 'protein_coding'}	{'ENST00000509990.5': 74, 'ENST00000502929.5': 74}	{'ENST00000509990.5': 'chr5', 'ENST00000502929.5': 'chr5'}	{'ENST00000509990.5': 139325440.0, 'ENST00000502929.5': 139325296.0}	{'ENST00000509990.5': 139325662.0, 'ENST00000502929.5': 139325662.0}	{'ENST00000509990.5': '+', 'ENST00000502929.5': '+'}	ENST00000509990.5	exon	protein_coding	74	chr5	139325440	139325662	+	['ENST00000509990.5', 'ENST00000502929.5']	[]	ENST00000509990.5	exon	protein_coding	74	chr5	139325440	139325662	+	[]	[]	ENST00000509990.5	exon	protein_coding	74	chr5	139325440	139325662	+	ENST00000509990.5	exon	protein_coding	74	chr5	139325440	139325662	+
Merged-chr5-891714-1	chr5	891677	891751	-	0	{'ENST00000467963.6': 'exon', 'ENST00000483173.5': 'start_codon'}	{'ENST00000467963.6': 'protein_coding', 'ENST00000483173.5': 'protein_coding'}	{'ENST00000467963.6': 74, 'ENST00000483173.5': 2}	{'ENST00000467963.6': 'chr5', 'ENST00000483173.5': 'chr5'}	{'ENST00000467963.6': 891640.0, 'ENST00000483173.5': 891750.0}	{'ENST00000467963.6': 891854.0, 'ENST00000483173.5': 891752.0}	{'ENST00000467963.6': '-', 'ENST00000483173.5': '-'}	ENST00000467963.6	exon	protein_coding	74	chr5	891640	891854	-	['ENST00000467963.6', 'ENST00000483173.5']	['ENST00000467963.6']	ENST00000467963.6	exon	protein_coding	74	chr5	891640	891854	-	[]	[]	ENST00000467963.6	exon	protein_coding	74	chr5	891640	891854	-	ENST00000467963.6	exon	protein_coding	74	chr5	891640	891854	-
Merged-chr5-77691329-1	chr5	77691292	77691366	-	0	{'ENST00000380377.9': '3UTR', 'ENST00000517679.5': '3UTR', 'ENST00000520361.5': '3UTR', 'ENST00000518338.6': '3UTR', 'ENST00000306388.10': '3UTR', 'ENST00000651106.1': '3UTR'}	{'ENST00000380377.9': 'protein_coding', 'ENST00000517679.5': 'protein_coding', 'ENST00000520361.5': 'protein_coding', 'ENST00000518338.6': 'protein_coding', 'ENST00000306388.10': 'protein_coding', 'ENST00000651106.1': 'protein_coding'}	{'ENST00000380377.9': 74, 'ENST00000517679.5': 74, 'ENST00000520361.5': 74, 'ENST00000518338.6': 74, 'ENST00000306388.10': 74, 'ENST00000651106.1': 74}	{'ENST00000380377.9': 'chr5', 'ENST00000517679.5': 'chr5', 'ENST00000520361.5': 'chr5', 'ENST00000518338.6': 'chr5', 'ENST00000306388.10': 'chr5', 'ENST00000651106.1': 'chr5'}	{'ENST00000380377.9': 77691166.0, 'ENST00000517679.5': 77691241.0, 'ENST00000520361.5': 77691248.0, 'ENST00000518338.6': 77691267.0, 'ENST00000306388.10': 77691241.0, 'ENST00000651106.1': 77691259.0}	{'ENST00000380377.9': 77691420.0, 'ENST00000517679.5': 77691420.0, 'ENST00000520361.5': 77691420.0, 'ENST00000518338.6': 77691420.0, 'ENST00000306388.10': 77693124.0, 'ENST00000651106.1': 77693412.0}	{'ENST00000380377.9': '-', 'ENST00000517679.5': '-', 'ENST00000520361.5': '-', 'ENST00000518338.6': '-', 'ENST00000306388.10': '-', 'ENST00000651106.1': '-'}	ENST00000518338.6	3UTR	protein_coding	74	chr5	77691267	77691420	-	['ENST00000380377.9', 'ENST00000517679.5', 'ENST00000520361.5', 'ENST00000518338.6', 'ENST00000306388.10', 'ENST00000651106.1']	['ENST00000380377.9']	ENST00000380377.9	3UTR	protein_coding	74	chr5	77691166	77691420	-	[]	['ENST00000380377.9', 'ENST00000517679.5', 'ENST00000520361.5', 'ENST00000518338.6', 'ENST00000306388.10', 'ENST00000651106.1']	ENST00000380377.9	3UTR	protein_coding	74	chr5	77691166	77691420	-	ENST00000380377.9	3UTR	protein_coding	74	chr5	77691166	77691420	-
Merged-chr17-4672388-1	chr17	4672351	4672425	-	0	{'ENST00000572293.7': 'exon', 'ENST00000436683.6': 'exon'}	{'ENST00000572293.7': 'protein_coding', 'ENST00000436683.6': 'protein_coding'}	{'ENST00000572293.7': 74, 'ENST00000436683.6': 74}	{'ENST00000572293.7': 'chr17', 'ENST00000436683.6': 'chr17'}	{'ENST00000572293.7': 4671691.0, 'ENST00000436683.6': 4672114.0}	{'ENST00000572293.7': 4673145.0, 'ENST00000436683.6': 4673145.0}	{'ENST00000572293.7': '-', 'ENST00000436683.6': '-'}	ENST00000436683.6	exon	protein_coding	74	chr17	4672114	4673145	-	['ENST00000572293.7', 'ENST00000436683.6']	['ENST00000572293.7']	ENST00000572293.7	exon	protein_coding	74	chr17	4671691	4673145	-	[]	[]	ENST00000572293.7	exon	protein_coding	74	chr17	4671691	4673145	-	ENST00000572293.7	exon	protein_coding	74	chr17	4671691	4673145	-
Merged-chr17-40398828-1	chr17	40398791	40398865	-	0	{'ENST00000423485.6': 'exon'}	{'ENST00000423485.6': 'protein_coding'}	{'ENST00000423485.6': 74}	{'ENST00000423485.6': 'chr17'}	{'ENST00000423485.6': 40398773.0}	{'ENST00000423485.6': 40398937.0}	{'ENST00000423485.6': '-'}	ENST00000423485.6	exon	protein_coding	74	chr17	40398773	40398937	-	['ENST00000423485.6']	['ENST00000423485.6']	ENST00000423485.6	exon	protein_coding	74	chr17	40398773	40398937	-	[]	[]	ENST00000423485.6	exon	protein_coding	74	chr17	40398773	40398937	-	ENST00000423485.6	exon	protein_coding	74	chr17	40398773	40398937	-
Merged-chr17-48060943-1	chr17	48060906	48060980	+	0	{'ENST00000362042.8': '3UTR', 'ENST00000585291.5': '3UTR', 'ENST00000357480.9': '3UTR', 'ENST00000361665.7': '3UTR'}	{'ENST00000362042.8': 'protein_coding', 'ENST00000585291.5': 'protein_coding', 'ENST00000357480.9': 'protein_coding', 'ENST00000361665.7': 'protein_coding'}	{'ENST00000362042.8': 74, 'ENST00000585291.5': 74, 'ENST00000357480.9': 74, 'ENST00000361665.7': 74}	{'ENST00000362042.8': 'chr17', 'ENST00000585291.5': 'chr17', 'ENST00000357480.9': 'chr17', 'ENST00000361665.7': 'chr17'}	{'ENST00000362042.8': 48059639.0, 'ENST00000585291.5': 48059639.0, 'ENST00000357480.9': 48059639.0, 'ENST00000361665.7': 48059639.0}	{'ENST00000362042.8': 48061545.0, 'ENST00000585291.5': 48061487.0, 'ENST00000357480.9': 48061479.0, 'ENST00000361665.7': 48061480.0}	{'ENST00000362042.8': '+', 'ENST00000585291.5': '+', 'ENST00000357480.9': '+', 'ENST00000361665.7': '+'}	ENST00000362042.8	3UTR	protein_coding	74	chr17	48059639	48061545	+	['ENST00000362042.8', 'ENST00000585291.5', 'ENST00000357480.9', 'ENST00000361665.7']	['ENST00000362042.8']	ENST00000362042.8	3UTR	protein_coding	74	chr17	48059639	48061545	+	[]	['ENST00000362042.8', 'ENST00000585291.5', 'ENST00000357480.9', 'ENST00000361665.7']	ENST00000362042.8	3UTR	protein_coding	74	chr17	48059639	48061545	+	ENST00000362042.8	3UTR	protein_coding	74	chr17	48059639	48061545	+
Merged-chr17-78855703-1	chr17	78855666	78855740	-	0	{'ENST00000585421.5': '3UTR', 'ENST00000586057.5': '3UTR', 'ENST00000586713.6': '3UTR', 'ENST00000587434.1': 'exon'}	{'ENST00000585421.5': 'protein_coding', 'ENST00000586057.5': 'protein_coding', 'ENST00000586713.6': 'protein_coding', 'ENST00000587434.1': 'lncRNA'}	{'ENST00000585421.5': 3, 'ENST00000586057.5': 3, 'ENST00000586713.6': 3, 'ENST00000587434.1': 74}	{'ENST00000585421.5': 'chr17', 'ENST00000586057.5': 'chr17', 'ENST00000586713.6': 'chr17', 'ENST00000587434.1': 'chr17'}	{'ENST00000585421.5': 78852977.0, 'ENST00000586057.5': 78852981.0, 'ENST00000586713.6': 78855568.0, 'ENST00000587434.1': 78855478.0}	{'ENST00000585421.5': 78855669.0, 'ENST00000586057.5': 78855669.0, 'ENST00000586713.6': 78855669.0, 'ENST00000587434.1': 78855844.0}	{'ENST00000585421.5': '-', 'ENST00000586057.5': '-', 'ENST00000586713.6': '-', 'ENST00000587434.1': '+'}	ENST00000587434.1	exon	lncRNA	74	chr17	78855478	78855844	+	['ENST00000585421.5', 'ENST00000586057.5', 'ENST00000586713.6', 'ENST00000587434.1']	[]	ENST00000587434.1	exon	lncRNA	74	chr17	78855478	78855844	+	[]	['ENST00000585421.5', 'ENST00000586057.5', 'ENST00000586713.6']	ENST00000585421.5	3UTR	protein_coding	3	chr17	78852977	78855669	-	ENST00000587434.1	exon	lncRNA	74	chr17	78855478	78855844	+
Merged-chr17-1518084-1	chr17	1518047	1518121	+	0	{'ENST00000425081.3': 'exon', 'ENST00000313486.12': 'exon'}	{'ENST00000425081.3': 'lncRNA', 'ENST00000313486.12': 'protein_coding'}	{'ENST00000425081.3': 54, 'ENST00000313486.12': 74}	{'ENST00000425081.3': 'chr17', 'ENST00000313486.12': 'chr17'}	{'ENST00000425081.3': 1517718.0, 'ENST00000313486.12': 1517718.0}	{'ENST00000425081.3': 1518101.0, 'ENST00000313486.12': 1520538.0}	{'ENST00000425081.3': '+', 'ENST00000313486.12': '-'}	ENST00000313486.12	exon	protein_coding	74	chr17	1517718	1520538	-	['ENST00000425081.3', 'ENST00000313486.12']	['ENST00000313486.12']	ENST00000313486.12	exon	protein_coding	74	chr17	1517718	1520538	-	[]	[]	ENST00000313486.12	exon	protein_coding	74	chr17	1517718	1520538	-	ENST00000313486.12	exon	protein_coding	74	chr17	1517718	1520538	-
Merged-chr17-8623075-1	chr17	8623038	8623112	-	0	{'ENST00000379980.8': 'CDS'}	{'ENST00000379980.8': 'protein_coding'}	{'ENST00000379980.8': 74}	{'ENST00000379980.8': 'chr17'}	{'ENST00000379980.8': 8622902.0}	{'ENST00000379980.8': 8623246.0}	{'ENST00000379980.8': '-'}	ENST00000379980.8	CDS	protein_coding	74	chr17	8622902	8623246	-	['ENST00000379980.8']	[]	ENST00000379980.8	CDS	protein_coding	74	chr17	8622902	8623246	-	[]	[]	ENST00000379980.8	CDS	protein_coding	74	chr17	8622902	8623246	-	ENST00000379980.8	CDS	protein_coding	74	chr17	8622902	8623246	-
Merged-chr17-28720723-1	chr17	28720686	28720760	+	0	{'ENST00000472628.1': 'exon', 'ENST00000422514.7': 'Intron', 'ENST00000496182.5': 'Intron', 'ENST00000394938.8': 'Intron'}	{'ENST00000472628.1': 'protein_coding', 'ENST00000422514.7': 'protein_coding', 'ENST00000496182.5': 'protein_coding', 'ENST00000394938.8': 'protein_coding'}	{'ENST00000472628.1': 74, 'ENST00000422514.7': 20, 'ENST00000496182.5': 20, 'ENST00000394938.8': 20}	{'ENST00000472628.1': 'chr17', 'ENST00000422514.7': 'chr17', 'ENST00000496182.5': 'chr17', 'ENST00000394938.8': 'chr17'}	{'ENST00000472628.1': 28720569.0, 'ENST00000422514.7': 28720030.0, 'ENST00000496182.5': 28720213.0, 'ENST00000394938.8': 28720430.0}	{'ENST00000472628.1': 28720890.0, 'ENST00000422514.7': 28720706.0, 'ENST00000496182.5': 28720706.0, 'ENST00000394938.8': 28720706.0}	{'ENST00000472628.1': '+', 'ENST00000422514.7': '+', 'ENST00000496182.5': '+', 'ENST00000394938.8': '+'}	ENST00000472628.1	exon	protein_coding	74	chr17	28720569	28720890	+	['ENST00000472628.1', 'ENST00000422514.7', 'ENST00000496182.5', 'ENST00000394938.8']	['ENST00000422514.7']	ENST00000422514.7	Intron	protein_coding	20	chr17	28720030	28720706	+	[]	[]	ENST00000422514.7	Intron	protein_coding	20	chr17	28720030	28720706	+	ENST00000422514.7	Intron	protein_coding	20	chr17	28720030	28720706	+
Merged-chr17-59932647-1	chr17	59932610	59932684	-	0	{'ENST00000393021.7': 'Intron'}	{'ENST00000393021.7': 'protein_coding'}	{'ENST00000393021.7': 74}	{'ENST00000393021.7': 'chr17'}	{'ENST00000393021.7': 59931722.0}	{'ENST00000393021.7': 59934169.0}	{'ENST00000393021.7': '+'}	ENST00000393021.7	Intron	protein_coding	74	chr17	59931722	59934169	+	['ENST00000393021.7']	[]	ENST00000393021.7	Intron	protein_coding	74	chr17	59931722	59934169	+	[]	[]	ENST00000393021.7	Intron	protein_coding	74	chr17	59931722	59934169	+	ENST00000393021.7	Intron	protein_coding	74	chr17	59931722	59934169	+
Merged-chr17-68298080-1	chr17	68298043	68298117	-	0	{'ENST00000621439.5': 'Intron', 'ENST00000452479.6': 'Intron', 'ENST00000448504.6': 'Intron'}	{'ENST00000621439.5': 'protein_coding', 'ENST00000452479.6': 'protein_coding', 'ENST00000448504.6': 'protein_coding'}	{'ENST00000621439.5': 74, 'ENST00000452479.6': 74, 'ENST00000448504.6': 74}	{'ENST00000621439.5': 'chr17', 'ENST00000452479.6': 'chr17', 'ENST00000448504.6': 'chr17'}	{'ENST00000621439.5': 68291568.0, 'ENST00000452479.6': 68291568.0, 'ENST00000448504.6': 68259426.0}	{'ENST00000621439.5': 68306942.0, 'ENST00000452479.6': 68343603.0, 'ENST00000448504.6': 68306942.0}	{'ENST00000621439.5': '+', 'ENST00000452479.6': '+', 'ENST00000448504.6': '+'}	ENST00000621439.5	Intron	protein_coding	74	chr17	68291568	68306942	+	['ENST00000621439.5', 'ENST00000452479.6', 'ENST00000448504.6']	['ENST00000621439.5']	ENST00000621439.5	Intron	protein_coding	74	chr17	68291568	68306942	+	[]	[]	ENST00000621439.5	Intron	protein_coding	74	chr17	68291568	68306942	+	ENST00000621439.5	Intron	protein_coding	74	chr17	68291568	68306942	+
Merged-chr17-78674054-1	chr17	78674017	78674091	-	0	{'ENST00000589296.5': '3UTR', 'ENST00000585509.5': '3UTR', 'ENST00000589768.6': '3UTR'}	{'ENST00000589296.5': 'protein_coding', 'ENST00000585509.5': 'protein_coding', 'ENST00000589768.6': 'protein_coding'}	{'ENST00000589296.5': 44, 'ENST00000585509.5': 44, 'ENST00000589768.6': 28}	{'ENST00000589296.5': 'chr17', 'ENST00000585509.5': 'chr17', 'ENST00000589768.6': 'chr17'}	{'ENST00000589296.5': 78674048.0, 'ENST00000585509.5': 78674048.0, 'ENST00000589768.6': 78674064.0}	{'ENST00000589296.5': 78675940.0, 'ENST00000585509.5': 78676093.0, 'ENST00000589768.6': 78676093.0}	{'ENST00000589296.5': '-', 'ENST00000585509.5': '-', 'ENST00000589768.6': '-'}	ENST00000589296.5	3UTR	protein_coding	44	chr17	78674048	78675940	-	['ENST00000589296.5', 'ENST00000585509.5', 'ENST00000589768.6']	[]	ENST00000589296.5	3UTR	protein_coding	44	chr17	78674048	78675940	-	[]	['ENST00000589296.5', 'ENST00000585509.5', 'ENST00000589768.6']	ENST00000589296.5	3UTR	protein_coding	44	chr17	78674048	78675940	-	ENST00000589296.5	3UTR	protein_coding	44	chr17	78674048	78675940	-
Merged-chr17-81636915-1	chr17	81636878	81636952	-	0	{'ENST00000705719.1': 'CDS', 'ENST00000374747.9': '5UTR', 'ENST00000331134.11': 'Intron'}	{'ENST00000705719.1': 'protein_coding', 'ENST00000374747.9': 'protein_coding', 'ENST00000331134.11': 'protein_coding'}	{'ENST00000705719.1': 37, 'ENST00000374747.9': 22, 'ENST00000331134.11': 37}	{'ENST00000705719.1': 'chr17', 'ENST00000374747.9': 'chr17', 'ENST00000331134.11': 'chr17'}	{'ENST00000705719.1': 81636916.0, 'ENST00000374747.9': 81636931.0, 'ENST00000331134.11': 81629805.0}	{'ENST00000705719.1': 81637059.0, 'ENST00000374747.9': 81637060.0, 'ENST00000331134.11': 81636915.0}	{'ENST00000705719.1': '-', 'ENST00000374747.9': '-', 'ENST00000331134.11': '-'}	ENST00000705719.1	CDS	protein_coding	37	chr17	81636916	81637059	-	['ENST00000705719.1', 'ENST00000374747.9', 'ENST00000331134.11']	['ENST00000331134.11']	ENST00000331134.11	Intron	protein_coding	37	chr17	81629805	81636915	-	['ENST00000374747.9']	[]	ENST00000331134.11	Intron	protein_coding	37	chr17	81629805	81636915	-	ENST00000374747.9	5UTR	protein_coding	22	chr17	81636931	81637060	-
Merged-chr17-4006101-1	chr17	4006064	4006138	-	0	{'ENST00000381638.7': '3UTR'}	{'ENST00000381638.7': 'protein_coding'}	{'ENST00000381638.7': 74}	{'ENST00000381638.7': 'chr17'}	{'ENST00000381638.7': 4004445.0}	{'ENST00000381638.7': 4006892.0}	{'ENST00000381638.7': '-'}	ENST00000381638.7	3UTR	protein_coding	74	chr17	4004445	4006892	-	['ENST00000381638.7']	['ENST00000381638.7']	ENST00000381638.7	3UTR	protein_coding	74	chr17	4004445	4006892	-	[]	['ENST00000381638.7']	ENST00000381638.7	3UTR	protein_coding	74	chr17	4004445	4006892	-	ENST00000381638.7	3UTR	protein_coding	74	chr17	4004445	4006892	-
Merged-chr17-8509799-1	chr17	8509762	8509836	-	0	{'ENST00000379980.8': 'Intron'}	{'ENST00000379980.8': 'protein_coding'}	{'ENST00000379980.8': 49}	{'ENST00000379980.8': 'chr17'}	{'ENST00000379980.8': 8508677.0}	{'ENST00000379980.8': 8509811.0}	{'ENST00000379980.8': '-'}	ENST00000379980.8	Intron	protein_coding	49	chr17	8508677	8509811	-	['ENST00000379980.8']	[]	ENST00000379980.8	Intron	protein_coding	49	chr17	8508677	8509811	-	[]	[]	ENST00000379980.8	Intron	protein_coding	49	chr17	8508677	8509811	-	ENST00000379980.8	Intron	protein_coding	49	chr17	8508677	8509811	-
Merged-chr17-17383363-1	chr17	17383326	17383400	-	0	{'ENST00000392730.2': 'exon'}	{'ENST00000392730.2': 'processed_pseudogene'}	{'ENST00000392730.2': 24}	{'ENST00000392730.2': 'chr17'}	{'ENST00000392730.2': 17383377.0}	{'ENST00000392730.2': 17384012.0}	{'ENST00000392730.2': '-'}	ENST00000392730.2	exon	processed_pseudogene	24	chr17	17383377	17384012	-	['ENST00000392730.2']	[]	ENST00000392730.2	exon	processed_pseudogene	24	chr17	17383377	17384012	-	[]	[]	ENST00000392730.2	exon	processed_pseudogene	24	chr17	17383377	17384012	-	ENST00000392730.2	exon	processed_pseudogene	24	chr17	17383377	17384012	-
Merged-chr17-40136895-1	chr17	40136858	40136932	+	0	{'ENST00000398532.9': '3UTR'}	{'ENST00000398532.9': 'protein_coding'}	{'ENST00000398532.9': 59}	{'ENST00000398532.9': 'chr17'}	{'ENST00000398532.9': 40134367.0}	{'ENST00000398532.9': 40136917.0}	{'ENST00000398532.9': '+'}	ENST00000398532.9	3UTR	protein_coding	59	chr17	40134367	40136917	+	['ENST00000398532.9']	['ENST00000398532.9']	ENST00000398532.9	3UTR	protein_coding	59	chr17	40134367	40136917	+	[]	['ENST00000398532.9']	ENST00000398532.9	3UTR	protein_coding	59	chr17	40134367	40136917	+	ENST00000398532.9	3UTR	protein_coding	59	chr17	40134367	40136917	+
Merged-chr17-43002775-1	chr17	43002738	43002812	+	0	{'ENST00000589037.5': 'Intron'}	{'ENST00000589037.5': 'protein_coding'}	{'ENST00000589037.5': 30}	{'ENST00000589037.5': 'chr17'}	{'ENST00000589037.5': 43002783.0}	{'ENST00000589037.5': 43002871.0}	{'ENST00000589037.5': '+'}	ENST00000589037.5	Intron	protein_coding	30	chr17	43002783	43002871	+	['ENST00000589037.5']	[]	ENST00000589037.5	Intron	protein_coding	30	chr17	43002783	43002871	+	[]	[]	ENST00000589037.5	Intron	protein_coding	30	chr17	43002783	43002871	+	ENST00000589037.5	Intron	protein_coding	30	chr17	43002783	43002871	+
Merged-chr17-50361059-1	chr17	50361022	50361096	+	0	{'ENST00000017003.7': '3UTR', 'ENST00000507602.5': 'Intron'}	{'ENST00000017003.7': 'protein_coding', 'ENST00000507602.5': 'protein_coding'}	{'ENST00000017003.7': 74, 'ENST00000507602.5': 74}	{'ENST00000017003.7': 'chr17', 'ENST00000507602.5': 'chr17'}	{'ENST00000017003.7': 50360289.0, 'ENST00000507602.5': 50357252.0}	{'ENST00000017003.7': 50361185.0, 'ENST00000507602.5': 50362978.0}	{'ENST00000017003.7': '+', 'ENST00000507602.5': '+'}	ENST00000017003.7	3UTR	protein_coding	74	chr17	50360289	50361185	+	['ENST00000017003.7', 'ENST00000507602.5']	['ENST00000017003.7']	ENST00000017003.7	3UTR	protein_coding	74	chr17	50360289	50361185	+	[]	['ENST00000017003.7']	ENST00000017003.7	3UTR	protein_coding	74	chr17	50360289	50361185	+	ENST00000017003.7	3UTR	protein_coding	74	chr17	50360289	50361185	+
Merged-chr17-66219812-1	chr17	66219775	66219849	+	0	{'ENST00000205948.11': 'Intron'}	{'ENST00000205948.11': 'protein_coding'}	{'ENST00000205948.11': 74}	{'ENST00000205948.11': 'chr17'}	{'ENST00000205948.11': 66216967.0}	{'ENST00000205948.11': 66220553.0}	{'ENST00000205948.11': '-'}	ENST00000205948.11	Intron	protein_coding	74	chr17	66216967	66220553	-	['ENST00000205948.11']	['ENST00000205948.11']	ENST00000205948.11	Intron	protein_coding	74	chr17	66216967	66220553	-	[]	[]	ENST00000205948.11	Intron	protein_coding	74	chr17	66216967	66220553	-	ENST00000205948.11	Intron	protein_coding	74	chr17	66216967	66220553	-
Merged-chr11-35808377-1	chr11	35808340	35808414	+	0	{'ENST00000299413.7': '3UTR'}	{'ENST00000299413.7': 'protein_coding'}	{'ENST00000299413.7': 74}	{'ENST00000299413.7': 'chr11'}	{'ENST00000299413.7': 35806383.0}	{'ENST00000299413.7': 35818007.0}	{'ENST00000299413.7': '+'}	ENST00000299413.7	3UTR	protein_coding	74	chr11	35806383	35818007	+	['ENST00000299413.7']	['ENST00000299413.7']	ENST00000299413.7	3UTR	protein_coding	74	chr11	35806383	35818007	+	[]	['ENST00000299413.7']	ENST00000299413.7	3UTR	protein_coding	74	chr11	35806383	35818007	+	ENST00000299413.7	3UTR	protein_coding	74	chr11	35806383	35818007	+
Merged-chr11-57778668-1	chr11	57778631	57778705	+	0	{'ENST00000674116.1': 'Intron', 'ENST00000531074.1': 'Intron', 'ENST00000524630.5': 'Intron', 'ENST00000529919.5': 'Intron', 'ENST00000358694.10': 'Intron', 'ENST00000361332.8': 'Intron', 'ENST00000415361.6': 'Intron', 'ENST00000426142.6': 'Intron', 'ENST00000428599.6': 'Intron', 'ENST00000525902.5': 'Intron', 'ENST00000526357.5': 'Intron', 'ENST00000532245.5': 'Intron', 'ENST00000532463.5': 'Int…	{'ENST00000674116.1': 'protein_coding', 'ENST00000531074.1': 'protein_coding', 'ENST00000524630.5': 'protein_coding', 'ENST00000529919.5': 'protein_coding', 'ENST00000358694.10': 'protein_coding', 'ENST00000361332.8': 'protein_coding', 'ENST00000415361.6': 'protein_coding', 'ENST00000426142.6': 'protein_coding', 'ENST00000428599.6': 'protein_coding', 'ENST00000525902.5': 'protein_coding', 'ENST00…	{'ENST00000674116.1': 74, 'ENST00000531074.1': 74, 'ENST00000524630.5': 74, 'ENST00000529919.5': 74, 'ENST00000358694.10': 74, 'ENST00000361332.8': 74, 'ENST00000415361.6': 74, 'ENST00000426142.6': 74, 'ENST00000428599.6': 74, 'ENST00000525902.5': 74, 'ENST00000526357.5': 74, 'ENST00000532245.5': 74, 'ENST00000532463.5': 74, 'ENST00000673826.1': 74, 'ENST00000673683.1': 74, 'ENST00000674106.1': 7…	{'ENST00000674116.1': 'chr11', 'ENST00000531074.1': 'chr11', 'ENST00000524630.5': 'chr11', 'ENST00000529919.5': 'chr11', 'ENST00000358694.10': 'chr11', 'ENST00000361332.8': 'chr11', 'ENST00000415361.6': 'chr11', 'ENST00000426142.6': 'chr11', 'ENST00000428599.6': 'chr11', 'ENST00000525902.5': 'chr11', 'ENST00000526357.5': 'chr11', 'ENST00000532245.5': 'chr11', 'ENST00000532463.5': 'chr11', 'ENST00…	{'ENST00000674116.1': 57737668.0, 'ENST00000531074.1': 57742984.0, 'ENST00000524630.5': 57753542.0, 'ENST00000529919.5': 57753407.0, 'ENST00000358694.10': 57762046.0, 'ENST00000361332.8': 57762119.0, 'ENST00000415361.6': 57762046.0, 'ENST00000426142.6': 57762119.0, 'ENST00000428599.6': 57762046.0, 'ENST00000525902.5': 57762046.0, 'ENST00000526357.5': 57762046.0, 'ENST00000532245.5': 57762046.0, '…	{'ENST00000674116.1': 57789036.0, 'ENST00000531074.1': 57791384.0, 'ENST00000524630.5': 57789036.0, 'ENST00000529919.5': 57789036.0, 'ENST00000358694.10': 57789036.0, 'ENST00000361332.8': 57789036.0, 'ENST00000415361.6': 57794009.0, 'ENST00000426142.6': 57794009.0, 'ENST00000428599.6': 57791384.0, 'ENST00000525902.5': 57801732.0, 'ENST00000526357.5': 57791493.0, 'ENST00000532245.5': 57795576.0, '…	{'ENST00000674116.1': '+', 'ENST00000531074.1': '+', 'ENST00000524630.5': '+', 'ENST00000529919.5': '+', 'ENST00000358694.10': '+', 'ENST00000361332.8': '+', 'ENST00000415361.6': '+', 'ENST00000426142.6': '+', 'ENST00000428599.6': '+', 'ENST00000525902.5': '+', 'ENST00000526357.5': '+', 'ENST00000532245.5': '+', 'ENST00000532463.5': '+', 'ENST00000673826.1': '+', 'ENST00000673683.1': '+', 'ENST00…	ENST00000674106.1	Intron	protein_coding	74	chr11	57764132	57789036	+	['ENST00000674116.1', 'ENST00000531074.1', 'ENST00000524630.5', 'ENST00000529919.5', 'ENST00000358694.10', 'ENST00000361332.8', 'ENST00000415361.6', 'ENST00000426142.6', 'ENST00000428599.6', 'ENST00000525902.5', 'ENST00000526357.5', 'ENST00000532245.5', 'ENST00000532463.5', 'ENST00000673826.1', 'ENST00000673683.1', 'ENST00000674106.1']	[]	ENST00000674106.1	Intron	protein_coding	74	chr11	57764132	57789036	+	[]	[]	ENST00000674106.1	Intron	protein_coding	74	chr11	57764132	57789036	+	ENST00000674106.1	Intron	protein_coding	74	chr11	57764132	57789036	+
Merged-chr11-62145246-1	chr11	62145209	62145283	+	0	{'ENST00000278849.4': 'exon'}	{'ENST00000278849.4': 'protein_coding'}	{'ENST00000278849.4': 74}	{'ENST00000278849.4': 'chr11'}	{'ENST00000278849.4': 62145169.0}	{'ENST00000278849.4': 62145289.0}	{'ENST00000278849.4': '+'}	ENST00000278849.4	exon	protein_coding	74	chr11	62145169	62145289	+	['ENST00000278849.4']	[]	ENST00000278849.4	exon	protein_coding	74	chr11	62145169	62145289	+	[]	[]	ENST00000278849.4	exon	protein_coding	74	chr11	62145169	62145289	+	ENST00000278849.4	exon	protein_coding	74	chr11	62145169	62145289	+
Merged-chr17-82224987-1	chr17	82224950	82225024	+	0	{'ENST00000580098.6': 'Intron'}	{'ENST00000580098.6': 'protein_coding'}	{'ENST00000580098.6': 74}	{'ENST00000580098.6': 'chr17'}	{'ENST00000580098.6': 82218184.0}	{'ENST00000580098.6': 82235982.0}	{'ENST00000580098.6': '+'}	ENST00000580098.6	Intron	protein_coding	74	chr17	82218184	82235982	+	['ENST00000580098.6']	[]	ENST00000580098.6	Intron	protein_coding	74	chr17	82218184	82235982	+	[]	[]	ENST00000580098.6	Intron	protein_coding	74	chr17	82218184	82235982	+	ENST00000580098.6	Intron	protein_coding	74	chr17	82218184	82235982	+
Merged-chr17-796380-1	chr17	796343	796417	-	0	{'Intergenic': 'Unlabeled'}	{'Intergenic': 'Intergenic'}	{'Intergenic': 0}	{'Intergenic': nan}	{'Intergenic': nan}	{'Intergenic': nan}	{'Intergenic': '-'}	Intergenic	Unlabeled	Intergenic	0				-	['Intergenic']	[]	Intergenic	Unlabeled	Intergenic	0				-	[]	[]	Intergenic	Unlabeled	Intergenic	0				-	Intergenic	Unlabeled	Intergenic	0				-
Merged-chr17-2666070-1	chr17	2666033	2666107	+	0	{'ENST00000397195.10': 'Intron', 'ENST00000674717.1': 'Intron'}	{'ENST00000397195.10': 'protein_coding', 'ENST00000674717.1': 'protein_coding'}	{'ENST00000397195.10': 18, 'ENST00000674717.1': 74}	{'ENST00000397195.10': 'chr17', 'ENST00000674717.1': 'chr17'}	{'ENST00000397195.10': 2666090.0, 'ENST00000674717.1': 2638320.0}	{'ENST00000397195.10': 2666991.0, 'ENST00000674717.1': 2666991.0}	{'ENST00000397195.10': '+', 'ENST00000674717.1': '+'}	ENST00000674717.1	Intron	protein_coding	74	chr17	2638320	2666991	+	['ENST00000397195.10', 'ENST00000674717.1']	['ENST00000397195.10']	ENST00000397195.10	Intron	protein_coding	18	chr17	2666090	2666991	+	[]	[]	ENST00000397195.10	Intron	protein_coding	18	chr17	2666090	2666991	+	ENST00000397195.10	Intron	protein_coding	18	chr17	2666090	2666991	+
Merged-chr11-63672647-1	chr11	63672610	63672684	+	0	{'Intergenic': 'Unlabeled'}	{'Intergenic': 'Intergenic'}	{'Intergenic': 0}	{'Intergenic': nan}	{'Intergenic': nan}	{'Intergenic': nan}	{'Intergenic': '+'}	Intergenic	Unlabeled	Intergenic	0				+	['Intergenic']	[]	Intergenic	Unlabeled	Intergenic	0				+	[]	[]	Intergenic	Unlabeled	Intergenic	0				+	Intergenic	Unlabeled	Intergenic	0				+
Merged-chr11-66543681-1	chr11	66543644	66543718	-	0	{'ENST00000310442.5': 'Intron', 'ENST00000526986.5': 'Intron'}	{'ENST00000310442.5': 'protein_coding', 'ENST00000526986.5': 'protein_coding'}	{'ENST00000310442.5': 59, 'ENST00000526986.5': 59}	{'ENST00000310442.5': 'chr11', 'ENST00000526986.5': 'chr11'}	{'ENST00000310442.5': 66539824.0, 'ENST00000526986.5': 66529488.0}	{'ENST00000310442.5': 66543703.0, 'ENST00000526986.5': 66543703.0}	{'ENST00000310442.5': '-', 'ENST00000526986.5': '-'}	ENST00000310442.5	Intron	protein_coding	59	chr11	66539824	66543703	-	['ENST00000310442.5', 'ENST00000526986.5']	['ENST00000310442.5']	ENST00000310442.5	Intron	protein_coding	59	chr11	66539824	66543703	-	[]	[]	ENST00000310442.5	Intron	protein_coding	59	chr11	66539824	66543703	-	ENST00000310442.5	Intron	protein_coding	59	chr11	66539824	66543703	-
Merged-chr17-17246833-1	chr17	17246796	17246870	-	0	{'ENST00000268717.10': '3UTR', 'ENST00000539941.6': '3UTR'}	{'ENST00000268717.10': 'protein_coding', 'ENST00000539941.6': 'protein_coding'}	{'ENST00000268717.10': 74, 'ENST00000539941.6': 51}	{'ENST00000268717.10': 'chr17', 'ENST00000539941.6': 'chr17'}	{'ENST00000268717.10': 17246616.0, 'ENST00000539941.6': 17246820.0}	{'ENST00000268717.10': 17247100.0, 'ENST00000539941.6': 17247100.0}	{'ENST00000268717.10': '-', 'ENST00000539941.6': '-'}	ENST00000268717.10	3UTR	protein_coding	74	chr17	17246616	17247100	-	['ENST00000268717.10', 'ENST00000539941.6']	['ENST00000268717.10']	ENST00000268717.10	3UTR	protein_coding	74	chr17	17246616	17247100	-	[]	['ENST00000268717.10', 'ENST00000539941.6']	ENST00000268717.10	3UTR	protein_coding	74	chr17	17246616	17247100	-	ENST00000268717.10	3UTR	protein_coding	74	chr17	17246616	17247100	-
Merged-chr17-21508985-1	chr17	21508948	21509022	+	0	{'ENST00000667136.1': 'Intron', 'ENST00000649041.1': 'Intron'}	{'ENST00000667136.1': 'lncRNA', 'ENST00000649041.1': 'lncRNA'}	{'ENST00000667136.1': 74, 'ENST00000649041.1': 74}	{'ENST00000667136.1': 'chr17', 'ENST00000649041.1': 'chr17'}	{'ENST00000667136.1': 21442118.0, 'ENST00000649041.1': 21451674.0}	{'ENST00000667136.1': 21535427.0, 'ENST00000649041.1': 21529021.0}	{'ENST00000667136.1': '-', 'ENST00000649041.1': '-'}	ENST00000649041.1	Intron	lncRNA	74	chr17	21451674	21529021	-	['ENST00000667136.1', 'ENST00000649041.1']	[]	ENST00000649041.1	Intron	lncRNA	74	chr17	21451674	21529021	-	[]	[]	ENST00000649041.1	Intron	lncRNA	74	chr17	21451674	21529021	-	ENST00000649041.1	Intron	lncRNA	74	chr17	21451674	21529021	-
Merged-chr11-66808427-1	chr11	66808390	66808464	+	0	{'ENST00000525908.6': 'Intron', 'ENST00000527634.5': 'Intron'}	{'ENST00000525908.6': 'protein_coding', 'ENST00000527634.5': 'protein_coding'}	{'ENST00000525908.6': 74, 'ENST00000527634.5': 74}	{'ENST00000525908.6': 'chr11', 'ENST00000527634.5': 'chr11'}	{'ENST00000525908.6': 66804190.0, 'ENST00000527634.5': 66804184.0}	{'ENST00000525908.6': 66813864.0, 'ENST00000527634.5': 66813855.0}	{'ENST00000525908.6': '+', 'ENST00000527634.5': '+'}	ENST00000525908.6	Intron	protein_coding	74	chr11	66804190	66813864	+	['ENST00000525908.6', 'ENST00000527634.5']	[]	ENST00000525908.6	Intron	protein_coding	74	chr11	66804190	66813864	+	[]	[]	ENST00000525908.6	Intron	protein_coding	74	chr11	66804190	66813864	+	ENST00000525908.6	Intron	protein_coding	74	chr11	66804190	66813864	+
Merged-chr11-102349465-1	chr11	102349428	102349502	+	0	{'ENST00000227758.7': 'AltUTR', 'ENST00000530675.5': 'Intron', 'ENST00000532672.5': 'Intron'}	{'ENST00000227758.7': 'protein_coding', 'ENST00000530675.5': 'protein_coding', 'ENST00000532672.5': 'protein_coding'}	{'ENST00000227758.7': 74, 'ENST00000530675.5': 74, 'ENST00000532672.5': 74}	{'ENST00000227758.7': 'chr11', 'ENST00000530675.5': 'chr11', 'ENST00000532672.5': 'chr11'}	{'ENST00000227758.7': 102348598.0, 'ENST00000530675.5': 102347376.0, 'ENST00000532672.5': 102348764.0}	{'ENST00000227758.7': 102349854.0, 'ENST00000530675.5': 102350000.0, 'ENST00000532672.5': 102349877.0}	{'ENST00000227758.7': '+', 'ENST00000530675.5': '+', 'ENST00000532672.5': '+'}	ENST00000532672.5	Intron	protein_coding	74	chr11	102348764	102349877	+	['ENST00000227758.7', 'ENST00000530675.5', 'ENST00000532672.5']	['ENST00000227758.7']	ENST00000227758.7	AltUTR	protein_coding	74	chr11	102348598	102349854	+	[]	[]	ENST00000227758.7	AltUTR	protein_coding	74	chr11	102348598	102349854	+	ENST00000227758.7	AltUTR	protein_coding	74	chr11	102348598	102349854	+
Merged-chr11-102396330-1	chr11	102396293	102396367	-	0	{'ENST00000398136.7': '3UTR'}	{'ENST00000398136.7': 'protein_coding'}	{'ENST00000398136.7': 36}	{'ENST00000398136.7': 'chr11'}	{'ENST00000398136.7': 102396332.0}	{'ENST00000398136.7': 102398869.0}	{'ENST00000398136.7': '-'}	ENST00000398136.7	3UTR	protein_coding	36	chr11	102396332	102398869	-	['ENST00000398136.7']	['ENST00000398136.7']	ENST00000398136.7	3UTR	protein_coding	36	chr11	102396332	102398869	-	[]	['ENST00000398136.7']	ENST00000398136.7	3UTR	protein_coding	36	chr11	102396332	102398869	-	ENST00000398136.7	3UTR	protein_coding	36	chr11	102396332	102398869	-
Merged-chr11-104277939-1	chr11	104277902	104277976	-	0	{'Intergenic': 'Unlabeled'}	{'Intergenic': 'Intergenic'}	{'Intergenic': 0}	{'Intergenic': nan}	{'Intergenic': nan}	{'Intergenic': nan}	{'Intergenic': '-'}	Intergenic	Unlabeled	Intergenic	0				-	['Intergenic']	[]	Intergenic	Unlabeled	Intergenic	0				-	[]	[]	Intergenic	Unlabeled	Intergenic	0				-	Intergenic	Unlabeled	Intergenic	0				-
Merged-chr11-1461623-1	chr11	1461586	1461660	+	0	{'ENST00000308219.13': '3UTR', 'ENST00000531197.5': 'exon', 'ENST00000528841.6': '3UTR', 'ENST00000528710.5': 'exon', 'ENST00000382179.5': '3UTR', 'ENST00000544817.5': 'exon'}	{'ENST00000308219.13': 'protein_coding', 'ENST00000531197.5': 'protein_coding', 'ENST00000528841.6': 'protein_coding', 'ENST00000528710.5': 'protein_coding', 'ENST00000382179.5': 'protein_coding', 'ENST00000544817.5': 'protein_coding'}	{'ENST00000308219.13': 74, 'ENST00000531197.5': 74, 'ENST00000528841.6': 74, 'ENST00000528710.5': 74, 'ENST00000382179.5': 74, 'ENST00000544817.5': 74}	{'ENST00000308219.13': 'chr11', 'ENST00000531197.5': 'chr11', 'ENST00000528841.6': 'chr11', 'ENST00000528710.5': 'chr11', 'ENST00000382179.5': 'chr11', 'ENST00000544817.5': 'chr11'}	{'ENST00000308219.13': 1460987.0, 'ENST00000531197.5': 1460970.0, 'ENST00000528841.6': 1460721.0, 'ENST00000528710.5': 1460970.0, 'ENST00000382179.5': 1460721.0, 'ENST00000544817.5': 1460970.0}	{'ENST00000308219.13': 1462685.0, 'ENST00000531197.5': 1461714.0, 'ENST00000528841.6': 1462689.0, 'ENST00000528710.5': 1462090.0, 'ENST00000382179.5': 1461745.0, 'ENST00000544817.5': 1462087.0}	{'ENST00000308219.13': '+', 'ENST00000531197.5': '+', 'ENST00000528841.6': '+', 'ENST00000528710.5': '+', 'ENST00000382179.5': '+', 'ENST00000544817.5': '+'}	ENST00000308219.13	3UTR	protein_coding	74	chr11	1460987	1462685	+	['ENST00000308219.13', 'ENST00000531197.5', 'ENST00000528841.6', 'ENST00000528710.5', 'ENST00000382179.5', 'ENST00000544817.5']	['ENST00000528841.6']	ENST00000528841.6	3UTR	protein_coding	74	chr11	1460721	1462689	+	[]	['ENST00000308219.13', 'ENST00000528841.6', 'ENST00000382179.5']	ENST00000308219.13	3UTR	protein_coding	74	chr11	1460987	1462685	+	ENST00000528841.6	3UTR	protein_coding	74	chr11	1460721	1462689	+
Merged-chr11-1556585-1	chr11	1556548	1556622	-	0	{'ENST00000331588.4': 'exon'}	{'ENST00000331588.4': 'protein_coding'}	{'ENST00000331588.4': 74}	{'ENST00000331588.4': 'chr11'}	{'ENST00000331588.4': 1554051.0}	{'ENST00000331588.4': 1557574.0}	{'ENST00000331588.4': '-'}	ENST00000331588.4	exon	protein_coding	74	chr11	1554051	1557574	-	['ENST00000331588.4']	[]	ENST00000331588.4	exon	protein_coding	74	chr11	1554051	1557574	-	[]	[]	ENST00000331588.4	exon	protein_coding	74	chr11	1554051	1557574	-	ENST00000331588.4	exon	protein_coding	74	chr11	1554051	1557574	-
Merged-chr11-9293097-1	chr11	9293060	9293134	-	0	{'ENST00000528080.6': 'Intron'}	{'ENST00000528080.6': 'protein_coding'}	{'ENST00000528080.6': 74}	{'ENST00000528080.6': 'chr11'}	{'ENST00000528080.6': 9288535.0}	{'ENST00000528080.6': 9295258.0}	{'ENST00000528080.6': '-'}	ENST00000528080.6	Intron	protein_coding	74	chr11	9288535	9295258	-	['ENST00000528080.6']	['ENST00000528080.6']	ENST00000528080.6	Intron	protein_coding	74	chr11	9288535	9295258	-	[]	[]	ENST00000528080.6	Intron	protein_coding	74	chr11	9288535	9295258	-	ENST00000528080.6	Intron	protein_coding	74	chr11	9288535	9295258	-
Merged-chr11-10774152-1	chr11	10774115	10774189	+	0	{'ENST00000361367.7': 'Intron'}	{'ENST00000361367.7': 'protein_coding'}	{'ENST00000361367.7': 21}	{'ENST00000361367.7': 'chr11'}	{'ENST00000361367.7': 10774169.0}	{'ENST00000361367.7': 10775206.0}	{'ENST00000361367.7': '+'}	ENST00000361367.7	Intron	protein_coding	21	chr11	10774169	10775206	+	['ENST00000361367.7']	['ENST00000361367.7']	ENST00000361367.7	Intron	protein_coding	21	chr11	10774169	10775206	+	[]	[]	ENST00000361367.7	Intron	protein_coding	21	chr11	10774169	10775206	+	ENST00000361367.7	Intron	protein_coding	21	chr11	10774169	10775206	+
Merged-chr11-12394164-1	chr11	12394127	12394201	+	0	{'ENST00000334956.15': 'Intron'}	{'ENST00000334956.15': 'protein_coding'}	{'ENST00000334956.15': 74}	{'ENST00000334956.15': 'chr11'}	{'ENST00000334956.15': 12377783.0}	{'ENST00000334956.15': 12473744.0}	{'ENST00000334956.15': '+'}	ENST00000334956.15	Intron	protein_coding	74	chr11	12377783	12473744	+	['ENST00000334956.15']	['ENST00000334956.15']	ENST00000334956.15	Intron	protein_coding	74	chr11	12377783	12473744	+	[]	[]	ENST00000334956.15	Intron	protein_coding	74	chr11	12377783	12473744	+	ENST00000334956.15	Intron	protein_coding	74	chr11	12377783	12473744	+
Merged-chr11-35251192-1	chr11	35251155	35251229	-	0	{'ENST00000278379.9': '3UTR'}	{'ENST00000278379.9': 'protein_coding'}	{'ENST00000278379.9': 25}	{'ENST00000278379.9': 'chr11'}	{'ENST00000278379.9': 35251205.0}	{'ENST00000278379.9': 35260896.0}	{'ENST00000278379.9': '-'}	ENST00000278379.9	3UTR	protein_coding	25	chr11	35251205	35260896	-	['ENST00000278379.9']	['ENST00000278379.9']	ENST00000278379.9	3UTR	protein_coding	25	chr11	35251205	35260896	-	[]	['ENST00000278379.9']	ENST00000278379.9	3UTR	protein_coding	25	chr11	35251205	35260896	-	ENST00000278379.9	3UTR	protein_coding	25	chr11	35251205	35260896	-
Merged-chr11-43344517-1	chr11	43344480	43344554	+	0	{'ENST00000531273.6': '3UTR', 'ENST00000378852.7': '3UTR', 'ENST00000526220.1': 'Intron'}	{'ENST00000531273.6': 'protein_coding', 'ENST00000378852.7': 'protein_coding', 'ENST00000526220.1': 'lncRNA'}	{'ENST00000531273.6': 49, 'ENST00000378852.7': 49, 'ENST00000526220.1': 74}	{'ENST00000531273.6': 'chr11', 'ENST00000378852.7': 'chr11', 'ENST00000526220.1': 'chr11'}	{'ENST00000531273.6': 43342508.0, 'ENST00000378852.7': 43342453.0, 'ENST00000526220.1': 43335332.0}	{'ENST00000531273.6': 43344529.0, 'ENST00000378852.7': 43344529.0, 'ENST00000526220.1': 43359220.0}	{'ENST00000531273.6': '+', 'ENST00000378852.7': '+', 'ENST00000526220.1': '-'}	ENST00000526220.1	Intron	lncRNA	74	chr11	43335332	43359220	-	['ENST00000531273.6', 'ENST00000378852.7', 'ENST00000526220.1']	['ENST00000531273.6']	ENST00000531273.6	3UTR	protein_coding	49	chr11	43342508	43344529	+	[]	['ENST00000531273.6', 'ENST00000378852.7']	ENST00000531273.6	3UTR	protein_coding	49	chr11	43342508	43344529	+	ENST00000531273.6	3UTR	protein_coding	49	chr11	43342508	43344529	+
Merged-chr11-47793096-1	chr11	47793059	47793133	-	0	{'ENST00000694866.1': 'Intron'}	{'ENST00000694866.1': 'protein_coding'}	{'ENST00000694866.1': 74}	{'ENST00000694866.1': 'chr11'}	{'ENST00000694866.1': 47792946.0}	{'ENST00000694866.1': 47797778.0}	{'ENST00000694866.1': '-'}	ENST00000694866.1	Intron	protein_coding	74	chr11	47792946	47797778	-	['ENST00000694866.1']	[]	ENST00000694866.1	Intron	protein_coding	74	chr11	47792946	47797778	-	[]	[]	ENST00000694866.1	Intron	protein_coding	74	chr11	47792946	47797778	-	ENST00000694866.1	Intron	protein_coding	74	chr11	47792946	47797778	-
Merged-chr11-62533971-1	chr11	62533934	62534008	-	0	{'ENST00000378024.9': 'CDS', 'ENST00000530124.5': 'Intron', 'ENST00000257247.11': 'Intron'}	{'ENST00000378024.9': 'protein_coding', 'ENST00000530124.5': 'protein_coding', 'ENST00000257247.11': 'protein_coding'}	{'ENST00000378024.9': 74, 'ENST00000530124.5': 74, 'ENST00000257247.11': 74}	{'ENST00000378024.9': 'chr11', 'ENST00000530124.5': 'chr11', 'ENST00000257247.11': 'chr11'}	{'ENST00000378024.9': 62516747.0, 'ENST00000530124.5': 62433891.0, 'ENST00000257247.11': 62491831.0}	{'ENST00000378024.9': 62534074.0, 'ENST00000530124.5': 62535002.0, 'ENST00000257247.11': 62535002.0}	{'ENST00000378024.9': '-', 'ENST00000530124.5': '-', 'ENST00000257247.11': '-'}	ENST00000378024.9	CDS	protein_coding	74	chr11	62516747	62534074	-	['ENST00000378024.9', 'ENST00000530124.5', 'ENST00000257247.11']	['ENST00000378024.9']	ENST00000378024.9	CDS	protein_coding	74	chr11	62516747	62534074	-	[]	[]	ENST00000378024.9	CDS	protein_coding	74	chr11	62516747	62534074	-	ENST00000378024.9	CDS	protein_coding	74	chr11	62516747	62534074	-
Merged-chr11-63624099-1	chr11	63624062	63624136	-	0	{'ENST00000398868.8': '3UTR'}	{'ENST00000398868.8': 'protein_coding'}	{'ENST00000398868.8': 50}	{'ENST00000398868.8': 'chr11'}	{'ENST00000398868.8': 63624087.0}	{'ENST00000398868.8': 63629321.0}	{'ENST00000398868.8': '-'}	ENST00000398868.8	3UTR	protein_coding	50	chr11	63624087	63629321	-	['ENST00000398868.8']	['ENST00000398868.8']	ENST00000398868.8	3UTR	protein_coding	50	chr11	63624087	63629321	-	[]	['ENST00000398868.8']	ENST00000398868.8	3UTR	protein_coding	50	chr11	63624087	63629321	-	ENST00000398868.8	3UTR	protein_coding	50	chr11	63624087	63629321	-
Merged-chr11-65597768-1	chr11	65597731	65597805	-	0	{'ENST00000532507.5': '3UTR', 'ENST00000309100.8': '3UTR'}	{'ENST00000532507.5': 'protein_coding', 'ENST00000309100.8': 'protein_coding'}	{'ENST00000532507.5': 50, 'ENST00000309100.8': 49}	{'ENST00000532507.5': 'chr11', 'ENST00000309100.8': 'chr11'}	{'ENST00000532507.5': 65597756.0, 'ENST00000309100.8': 65597757.0}	{'ENST00000532507.5': 65598293.0, 'ENST00000309100.8': 65598293.0}	{'ENST00000532507.5': '-', 'ENST00000309100.8': '-'}	ENST00000532507.5	3UTR	protein_coding	50	chr11	65597756	65598293	-	['ENST00000532507.5', 'ENST00000309100.8']	['ENST00000309100.8']	ENST00000309100.8	3UTR	protein_coding	49	chr11	65597757	65598293	-	[]	['ENST00000532507.5', 'ENST00000309100.8']	ENST00000532507.5	3UTR	protein_coding	50	chr11	65597756	65598293	-	ENST00000309100.8	3UTR	protein_coding	49	chr11	65597757	65598293	-
Merged-chr11-66081142-1	chr11	66081105	66081179	+	0	{'ENST00000320580.9': 'Intron'}	{'ENST00000320580.9': 'protein_coding'}	{'ENST00000320580.9': 74}	{'ENST00000320580.9': 'chr11'}	{'ENST00000320580.9': 66070842.0}	{'ENST00000320580.9': 66193485.0}	{'ENST00000320580.9': '+'}	ENST00000320580.9	Intron	protein_coding	74	chr11	66070842	66193485	+	['ENST00000320580.9']	['ENST00000320580.9']	ENST00000320580.9	Intron	protein_coding	74	chr11	66070842	66193485	+	[]	[]	ENST00000320580.9	Intron	protein_coding	74	chr11	66070842	66193485	+	ENST00000320580.9	Intron	protein_coding	74	chr11	66070842	66193485	+
Merged-chr11-67491085-1	chr11	67491048	67491122	+	0	{'ENST00000279146.8': '3UTR', 'ENST00000528641.7': '3UTR', 'ENST00000684006.1': '3UTR', 'ENST00000683237.1': '3UTR', 'ENST00000684657.1': '3UTR', 'ENST00000682659.1': '3UTR'}	{'ENST00000279146.8': 'protein_coding', 'ENST00000528641.7': 'protein_coding', 'ENST00000684006.1': 'protein_coding', 'ENST00000683237.1': 'protein_coding', 'ENST00000684657.1': 'protein_coding', 'ENST00000682659.1': 'protein_coding'}	{'ENST00000279146.8': 55, 'ENST00000528641.7': 53, 'ENST00000684006.1': 54, 'ENST00000683237.1': 55, 'ENST00000684657.1': 74, 'ENST00000682659.1': 38}	{'ENST00000279146.8': 'chr11', 'ENST00000528641.7': 'chr11', 'ENST00000684006.1': 'chr11', 'ENST00000683237.1': 'chr11', 'ENST00000684657.1': 'chr11', 'ENST00000682659.1': 'chr11'}	{'ENST00000279146.8': 67490991.0, 'ENST00000528641.7': 67490991.0, 'ENST00000684006.1': 67490858.0, 'ENST00000683237.1': 67490858.0, 'ENST00000684657.1': 67490991.0, 'ENST00000682659.1': 67490991.0}	{'ENST00000279146.8': 67491103.0, 'ENST00000528641.7': 67491101.0, 'ENST00000684006.1': 67491102.0, 'ENST00000683237.1': 67491103.0, 'ENST00000684657.1': 67491154.0, 'ENST00000682659.1': 67491086.0}	{'ENST00000279146.8': '+', 'ENST00000528641.7': '+', 'ENST00000684006.1': '+', 'ENST00000683237.1': '+', 'ENST00000684657.1': '+', 'ENST00000682659.1': '+'}	ENST00000684657.1	3UTR	protein_coding	74	chr11	67490991	67491154	+	['ENST00000279146.8', 'ENST00000528641.7', 'ENST00000684006.1', 'ENST00000683237.1', 'ENST00000684657.1', 'ENST00000682659.1']	['ENST00000279146.8']	ENST00000279146.8	3UTR	protein_coding	55	chr11	67490991	67491103	+	[]	['ENST00000279146.8', 'ENST00000528641.7', 'ENST00000684006.1', 'ENST00000683237.1', 'ENST00000684657.1', 'ENST00000682659.1']	ENST00000684657.1	3UTR	protein_coding	74	chr11	67490991	67491154	+	ENST00000279146.8	3UTR	protein_coding	55	chr11	67490991	67491103	+
Merged-chr11-73825784-1	chr11	73825747	73825821	+	0	{'ENST00000310614.12': 'Intron', 'ENST00000542303.5': 'Intron'}	{'ENST00000310614.12': 'protein_coding', 'ENST00000542303.5': 'protein_coding'}	{'ENST00000310614.12': 26, 'ENST00000542303.5': 26}	{'ENST00000310614.12': 'chr11', 'ENST00000542303.5': 'chr11'}	{'ENST00000310614.12': 73825796.0, 'ENST00000542303.5': 73825796.0}	{'ENST00000310614.12': 73844806.0, 'ENST00000542303.5': 73863171.0}	{'ENST00000310614.12': '+', 'ENST00000542303.5': '+'}	ENST00000310614.12	Intron	protein_coding	26	chr11	73825796	73844806	+	['ENST00000310614.12', 'ENST00000542303.5']	['ENST00000310614.12']	ENST00000310614.12	Intron	protein_coding	26	chr11	73825796	73844806	+	[]	[]	ENST00000310614.12	Intron	protein_coding	26	chr11	73825796	73844806	+	ENST00000310614.12	Intron	protein_coding	26	chr11	73825796	73844806	+
Merged-chr11-76255772-1	chr11	76255735	76255809	+	0	{'Intergenic': 'Unlabeled'}	{'Intergenic': 'Intergenic'}	{'Intergenic': 0}	{'Intergenic': nan}	{'Intergenic': nan}	{'Intergenic': nan}	{'Intergenic': '+'}	Intergenic	Unlabeled	Intergenic	0				+	['Intergenic']	[]	Intergenic	Unlabeled	Intergenic	0				+	[]	[]	Intergenic	Unlabeled	Intergenic	0				+	Intergenic	Unlabeled	Intergenic	0				+
Merged-chr11-85636503-1	chr11	85636466	85636540	+	0	{'ENST00000393375.5': '3UTR', 'ENST00000358867.11': '3UTR', 'ENST00000534341.1': '3UTR'}	{'ENST00000393375.5': 'protein_coding', 'ENST00000358867.11': 'protein_coding', 'ENST00000534341.1': 'protein_coding'}	{'ENST00000393375.5': 73, 'ENST00000358867.11': 70, 'ENST00000534341.1': 70}	{'ENST00000393375.5': 'chr11', 'ENST00000358867.11': 'chr11', 'ENST00000534341.1': 'chr11'}	{'ENST00000393375.5': 85636227.0, 'ENST00000358867.11': 85636227.0, 'ENST00000534341.1': 85635780.0}	{'ENST00000393375.5': 85636539.0, 'ENST00000358867.11': 85636536.0, 'ENST00000534341.1': 85636536.0}	{'ENST00000393375.5': '+', 'ENST00000358867.11': '+', 'ENST00000534341.1': '+'}	ENST00000393375.5	3UTR	protein_coding	73	chr11	85636227	85636539	+	['ENST00000393375.5', 'ENST00000358867.11', 'ENST00000534341.1']	['ENST00000358867.11']	ENST00000358867.11	3UTR	protein_coding	70	chr11	85636227	85636536	+	[]	['ENST00000393375.5', 'ENST00000358867.11', 'ENST00000534341.1']	ENST00000393375.5	3UTR	protein_coding	73	chr11	85636227	85636539	+	ENST00000358867.11	3UTR	protein_coding	70	chr11	85636227	85636536	+
Merged-chr11-88326083-1	chr11	88326046	88326120	-	0	{'ENST00000524463.6': '3UTR', 'ENST00000528020.2': '3UTR', 'ENST00000529974.2': '3UTR', 'ENST00000677976.1': '3UTR', 'ENST00000393301.5': '3UTR', 'ENST00000679224.1': 'Intron', 'ENST00000679199.1': 'Intron'}	{'ENST00000524463.6': 'protein_coding', 'ENST00000528020.2': 'protein_coding', 'ENST00000529974.2': 'protein_coding', 'ENST00000677976.1': 'protein_coding', 'ENST00000393301.5': 'protein_coding', 'ENST00000679224.1': 'protein_coding', 'ENST00000679199.1': 'protein_coding'}	{'ENST00000524463.6': 74, 'ENST00000528020.2': 74, 'ENST00000529974.2': 35, 'ENST00000677976.1': 33, 'ENST00000393301.5': 33, 'ENST00000679224.1': 74, 'ENST00000679199.1': 74}	{'ENST00000524463.6': 'chr11', 'ENST00000528020.2': 'chr11', 'ENST00000529974.2': 'chr11', 'ENST00000677976.1': 'chr11', 'ENST00000393301.5': 'chr11', 'ENST00000679224.1': 'chr11', 'ENST00000679199.1': 'chr11'}	{'ENST00000524463.6': 88320811.0, 'ENST00000528020.2': 88326022.0, 'ENST00000529974.2': 88326086.0, 'ENST00000677976.1': 88326088.0, 'ENST00000393301.5': 88326088.0, 'ENST00000679224.1': 88312554.0, 'ENST00000679199.1': 88316474.0}	{'ENST00000524463.6': 88326435.0, 'ENST00000528020.2': 88326435.0, 'ENST00000529974.2': 88326379.0, 'ENST00000677976.1': 88326410.0, 'ENST00000393301.5': 88326439.0, 'ENST00000679224.1': 88334936.0, 'ENST00000679199.1': 88334936.0}	{'ENST00000524463.6': '-', 'ENST00000528020.2': '-', 'ENST00000529974.2': '-', 'ENST00000677976.1': '-', 'ENST00000393301.5': '-', 'ENST00000679224.1': '-', 'ENST00000679199.1': '-'}	ENST00000528020.2	3UTR	protein_coding	74	chr11	88326022	88326435	-	['ENST00000524463.6', 'ENST00000528020.2', 'ENST00000529974.2', 'ENST00000677976.1', 'ENST00000393301.5', 'ENST00000679224.1', 'ENST00000679199.1']	[]	ENST00000528020.2	3UTR	protein_coding	74	chr11	88326022	88326435	-	[]	['ENST00000524463.6', 'ENST00000528020.2', 'ENST00000529974.2', 'ENST00000677976.1', 'ENST00000393301.5']	ENST00000524463.6	3UTR	protein_coding	74	chr11	88320811	88326435	-	ENST00000528020.2	3UTR	protein_coding	74	chr11	88326022	88326435	-
Merged-chr11-108147594-1	chr11	108147557	108147631	+	0	{'ENST00000672284.1': '3UTR', 'ENST00000265838.9': '3UTR', 'ENST00000649165.1': 'Intron'}	{'ENST00000672284.1': 'protein_coding', 'ENST00000265838.9': 'protein_coding', 'ENST00000649165.1': 'lncRNA'}	{'ENST00000672284.1': 37, 'ENST00000265838.9': 46, 'ENST00000649165.1': 74}	{'ENST00000672284.1': 'chr11', 'ENST00000265838.9': 'chr11', 'ENST00000649165.1': 'chr11'}	{'ENST00000672284.1': 108147388.0, 'ENST00000265838.9': 108147388.0, 'ENST00000649165.1': 108142669.0}	{'ENST00000672284.1': 108147594.0, 'ENST00000265838.9': 108147603.0, 'ENST00000649165.1': 108149847.0}	{'ENST00000672284.1': '+', 'ENST00000265838.9': '+', 'ENST00000649165.1': '-'}	ENST00000649165.1	Intron	lncRNA	74	chr11	108142669	108149847	-	['ENST00000672284.1', 'ENST00000265838.9', 'ENST00000649165.1']	['ENST00000265838.9']	ENST00000265838.9	3UTR	protein_coding	46	chr11	108147388	108147603	+	[]	['ENST00000672284.1', 'ENST00000265838.9']	ENST00000265838.9	3UTR	protein_coding	46	chr11	108147388	108147603	+	ENST00000265838.9	3UTR	protein_coding	46	chr11	108147388	108147603	+
Merged-chr11-108422790-1	chr11	108422753	108422827	+	0	{'ENST00000525729.5': 'Intron', 'ENST00000615746.4': 'Intron'}	{'ENST00000525729.5': 'protein_coding', 'ENST00000615746.4': 'protein_coding'}	{'ENST00000525729.5': 74, 'ENST00000615746.4': 74}	{'ENST00000525729.5': 'chr11', 'ENST00000615746.4': 'chr11'}	{'ENST00000525729.5': 108406963.0, 'ENST00000615746.4': 108407149.0}	{'ENST00000525729.5': 108461478.0, 'ENST00000615746.4': 108431745.0}	{'ENST00000525729.5': '-', 'ENST00000615746.4': '-'}	ENST00000615746.4	Intron	protein_coding	74	chr11	108407149	108431745	-	['ENST00000525729.5', 'ENST00000615746.4']	[]	ENST00000615746.4	Intron	protein_coding	74	chr11	108407149	108431745	-	[]	[]	ENST00000615746.4	Intron	protein_coding	74	chr11	108407149	108431745	-	ENST00000615746.4	Intron	protein_coding	74	chr11	108407149	108431745	-
Merged-chr11-110236116-1	chr11	110236079	110236153	-	0	{'ENST00000528498.5': 'Intron', 'ENST00000530301.5': 'Intron'}	{'ENST00000528498.5': 'protein_coding', 'ENST00000530301.5': 'protein_coding'}	{'ENST00000528498.5': 19, 'ENST00000530301.5': 74}	{'ENST00000528498.5': 'chr11', 'ENST00000530301.5': 'chr11'}	{'ENST00000528498.5': 110233479.0, 'ENST00000530301.5': 110232004.0}	{'ENST00000528498.5': 110236098.0, 'ENST00000530301.5': 110258156.0}	{'ENST00000528498.5': '-', 'ENST00000530301.5': '-'}	ENST00000530301.5	Intron	protein_coding	74	chr11	110232004	110258156	-	['ENST00000528498.5', 'ENST00000530301.5']	[]	ENST00000530301.5	Intron	protein_coding	74	chr11	110232004	110258156	-	[]	[]	ENST00000530301.5	Intron	protein_coding	74	chr11	110232004	110258156	-	ENST00000530301.5	Intron	protein_coding	74	chr11	110232004	110258156	-
Merged-chr11-110263947-1	chr11	110263910	110263984	-	0	{'ENST00000528498.5': 'Intron', 'ENST00000528900.5': 'Intron', 'ENST00000544551.5': 'Intron'}	{'ENST00000528498.5': 'protein_coding', 'ENST00000528900.5': 'protein_coding', 'ENST00000544551.5': 'protein_coding'}	{'ENST00000528498.5': 49, 'ENST00000528900.5': 74, 'ENST00000544551.5': 74}	{'ENST00000528498.5': 'chr11', 'ENST00000528900.5': 'chr11', 'ENST00000544551.5': 'chr11'}	{'ENST00000528498.5': 110258189.0, 'ENST00000528900.5': 110247833.0, 'ENST00000544551.5': 110258189.0}	{'ENST00000528498.5': 110263959.0, 'ENST00000528900.5': 110279680.0, 'ENST00000544551.5': 110272535.0}	{'ENST00000528498.5': '-', 'ENST00000528900.5': '-', 'ENST00000544551.5': '-'}	ENST00000544551.5	Intron	protein_coding	74	chr11	110258189	110272535	-	['ENST00000528498.5', 'ENST00000528900.5', 'ENST00000544551.5']	[]	ENST00000544551.5	Intron	protein_coding	74	chr11	110258189	110272535	-	[]	[]	ENST00000544551.5	Intron	protein_coding	74	chr11	110258189	110272535	-	ENST00000544551.5	Intron	protein_coding	74	chr11	110258189	110272535	-
Merged-chr1-42702005-1	chr1	42701968	42702042	+	0	{'ENST00000321358.12': 'Intron'}	{'ENST00000321358.12': 'protein_coding'}	{'ENST00000321358.12': 12}	{'ENST00000321358.12': 'chr1'}	{'ENST00000321358.12': 42701046.0}	{'ENST00000321358.12': 42701980.0}	{'ENST00000321358.12': '+'}	ENST00000321358.12	Intron	protein_coding	12	chr1	42701046	42701980	+	['ENST00000321358.12']	['ENST00000321358.12']	ENST00000321358.12	Intron	protein_coding	12	chr1	42701046	42701980	+	[]	[]	ENST00000321358.12	Intron	protein_coding	12	chr1	42701046	42701980	+	ENST00000321358.12	Intron	protein_coding	12	chr1	42701046	42701980	+
Merged-chr11-130877130-1	chr11	130877093	130877167	-	0	{'ENST00000265909.9': '3UTR'}	{'ENST00000265909.9': 'protein_coding'}	{'ENST00000265909.9': 74}	{'ENST00000265909.9': 'chr11'}	{'ENST00000265909.9': 130866250.0}	{'ENST00000265909.9': 130878424.0}	{'ENST00000265909.9': '-'}	ENST00000265909.9	3UTR	protein_coding	74	chr11	130866250	130878424	-	['ENST00000265909.9']	['ENST00000265909.9']	ENST00000265909.9	3UTR	protein_coding	74	chr11	130866250	130878424	-	[]	['ENST00000265909.9']	ENST00000265909.9	3UTR	protein_coding	74	chr11	130866250	130878424	-	ENST00000265909.9	3UTR	protein_coding	74	chr11	130866250	130878424	-
Merged-chr19-4838349-1	chr19	4838312	4838386	-	0	{'ENST00000591657.1': 'exon', 'ENST00000221957.9': '3UTR', 'ENST00000592528.5': '3UTR'}	{'ENST00000591657.1': 'lncRNA', 'ENST00000221957.9': 'protein_coding', 'ENST00000592528.5': 'protein_coding'}	{'ENST00000591657.1': 55, 'ENST00000221957.9': 46, 'ENST00000592528.5': 18}	{'ENST00000591657.1': 'chr19', 'ENST00000221957.9': 'chr19', 'ENST00000592528.5': 'chr19'}	{'ENST00000591657.1': 4838332.0, 'ENST00000221957.9': 4838341.0, 'ENST00000592528.5': 4838369.0}	{'ENST00000591657.1': 4838410.0, 'ENST00000221957.9': 4839194.0, 'ENST00000592528.5': 4839194.0}	{'ENST00000591657.1': '+', 'ENST00000221957.9': '-', 'ENST00000592528.5': '-'}	ENST00000591657.1	exon	lncRNA	55	chr19	4838332	4838410	+	['ENST00000591657.1', 'ENST00000221957.9', 'ENST00000592528.5']	['ENST00000221957.9']	ENST00000221957.9	3UTR	protein_coding	46	chr19	4838341	4839194	-	[]	['ENST00000221957.9', 'ENST00000592528.5']	ENST00000221957.9	3UTR	protein_coding	46	chr19	4838341	4839194	-	ENST00000221957.9	3UTR	protein_coding	46	chr19	4838341	4839194	-
Merged-chr19-14087879-1	chr19	14087842	14087916	-	0	{'ENST00000533683.7': '3UTR'}	{'ENST00000533683.7': 'protein_coding'}	{'ENST00000533683.7': 66}	{'ENST00000533683.7': 'chr19'}	{'ENST00000533683.7': 14087851.0}	{'ENST00000533683.7': 14088419.0}	{'ENST00000533683.7': '-'}	ENST00000533683.7	3UTR	protein_coding	66	chr19	14087851	14088419	-	['ENST00000533683.7']	[]	ENST00000533683.7	3UTR	protein_coding	66	chr19	14087851	14088419	-	[]	['ENST00000533683.7']	ENST00000533683.7	3UTR	protein_coding	66	chr19	14087851	14088419	-	ENST00000533683.7	3UTR	protein_coding	66	chr19	14087851	14088419	-
Merged-chr1-58782329-1	chr1	58782292	58782366	-	0	{'ENST00000371222.4': 'CDS', 'ENST00000710273.1': 'CDS'}	{'ENST00000371222.4': 'protein_coding', 'ENST00000710273.1': 'protein_coding'}	{'ENST00000371222.4': 74, 'ENST00000710273.1': 74}	{'ENST00000371222.4': 'chr1', 'ENST00000710273.1': 'chr1'}	{'ENST00000371222.4': 58782078.0, 'ENST00000710273.1': 58782078.0}	{'ENST00000371222.4': 58783070.0, 'ENST00000710273.1': 58783136.0}	{'ENST00000371222.4': '-', 'ENST00000710273.1': '-'}	ENST00000371222.4	CDS	protein_coding	74	chr1	58782078	58783070	-	['ENST00000371222.4', 'ENST00000710273.1']	['ENST00000371222.4']	ENST00000371222.4	CDS	protein_coding	74	chr1	58782078	58783070	-	[]	[]	ENST00000371222.4	CDS	protein_coding	74	chr1	58782078	58783070	-	ENST00000371222.4	CDS	protein_coding	74	chr1	58782078	58783070	-
Merged-chr1-114717311-1	chr1	114717274	114717348	-	0	{'ENST00000339438.10': '3UTR', 'ENST00000689989.1': '3UTR', 'ENST00000689732.1': '3UTR', 'ENST00000687759.1': '3UTR', 'ENST00000692672.1': '3UTR', 'ENST00000690207.1': '3UTR', 'ENST00000261443.9': '3UTR', 'ENST00000530886.5': '3UTR', 'ENST00000369530.5': '3UTR'}	{'ENST00000339438.10': 'protein_coding', 'ENST00000689989.1': 'protein_coding', 'ENST00000689732.1': 'protein_coding', 'ENST00000687759.1': 'protein_coding', 'ENST00000692672.1': 'protein_coding', 'ENST00000690207.1': 'protein_coding', 'ENST00000261443.9': 'protein_coding', 'ENST00000530886.5': 'protein_coding', 'ENST00000369530.5': 'protein_coding'}	{'ENST00000339438.10': 74, 'ENST00000689989.1': 74, 'ENST00000689732.1': 74, 'ENST00000687759.1': 74, 'ENST00000692672.1': 74, 'ENST00000690207.1': 74, 'ENST00000261443.9': 54, 'ENST00000530886.5': 44, 'ENST00000369530.5': 37}	{'ENST00000339438.10': 'chr1', 'ENST00000689989.1': 'chr1', 'ENST00000689732.1': 'chr1', 'ENST00000687759.1': 'chr1', 'ENST00000692672.1': 'chr1', 'ENST00000690207.1': 'chr1', 'ENST00000261443.9': 'chr1', 'ENST00000530886.5': 'chr1', 'ENST00000369530.5': 'chr1'}	{'ENST00000339438.10': 114716913.0, 'ENST00000689989.1': 114716916.0, 'ENST00000689732.1': 114716919.0, 'ENST00000687759.1': 114716920.0, 'ENST00000692672.1': 114716921.0, 'ENST00000690207.1': 114716923.0, 'ENST00000261443.9': 114717295.0, 'ENST00000530886.5': 114717305.0, 'ENST00000369530.5': 114717312.0}	{'ENST00000339438.10': 114718171.0, 'ENST00000689989.1': 114718171.0, 'ENST00000689732.1': 114718171.0, 'ENST00000687759.1': 114718171.0, 'ENST00000692672.1': 114718171.0, 'ENST00000690207.1': 114718171.0, 'ENST00000261443.9': 114718171.0, 'ENST00000530886.5': 114718171.0, 'ENST00000369530.5': 114718171.0}	{'ENST00000339438.10': '-', 'ENST00000689989.1': '-', 'ENST00000689732.1': '-', 'ENST00000687759.1': '-', 'ENST00000692672.1': '-', 'ENST00000690207.1': '-', 'ENST00000261443.9': '-', 'ENST00000530886.5': '-', 'ENST00000369530.5': '-'}	ENST00000690207.1	3UTR	protein_coding	74	chr1	114716923	114718171	-	['ENST00000339438.10', 'ENST00000689989.1', 'ENST00000689732.1', 'ENST00000687759.1', 'ENST00000692672.1', 'ENST00000690207.1', 'ENST00000261443.9', 'ENST00000530886.5', 'ENST00000369530.5']	[]	ENST00000690207.1	3UTR	protein_coding	74	chr1	114716923	114718171	-	[]	['ENST00000339438.10', 'ENST00000689989.1', 'ENST00000689732.1', 'ENST00000687759.1', 'ENST00000692672.1', 'ENST00000690207.1', 'ENST00000261443.9', 'ENST00000530886.5', 'ENST00000369530.5']	ENST00000339438.10	3UTR	protein_coding	74	chr1	114716913	114718171	-	ENST00000690207.1	3UTR	protein_coding	74	chr1	114716923	114718171	-
Merged-chr19-58558379-1	chr19	58558342	58558416	-	0	{'ENST00000253023.8': '5UTR'}	{'ENST00000253023.8': 'protein_coding'}	{'ENST00000253023.8': 35}	{'ENST00000253023.8': 'chr19'}	{'ENST00000253023.8': 58558382.0}	{'ENST00000253023.8': 58558611.0}	{'ENST00000253023.8': '-'}	ENST00000253023.8	5UTR	protein_coding	35	chr19	58558382	58558611	-	['ENST00000253023.8']	['ENST00000253023.8']	ENST00000253023.8	5UTR	protein_coding	35	chr19	58558382	58558611	-	['ENST00000253023.8']	[]	ENST00000253023.8	5UTR	protein_coding	35	chr19	58558382	58558611	-	ENST00000253023.8	5UTR	protein_coding	35	chr19	58558382	58558611	-
Merged-chr19-867984-1	chr19	867947	868021	-	0	{'ENST00000325464.6': '3UTR', 'ENST00000395808.7': '3UTR', 'ENST00000312090.10': '3UTR'}	{'ENST00000325464.6': 'protein_coding', 'ENST00000395808.7': 'protein_coding', 'ENST00000312090.10': 'protein_coding'}	{'ENST00000325464.6': 59, 'ENST00000395808.7': 74, 'ENST00000312090.10': 74}	{'ENST00000325464.6': 'chr19', 'ENST00000395808.7': 'chr19', 'ENST00000312090.10': 'chr19'}	{'ENST00000325464.6': 867963.0, 'ENST00000395808.7': 867630.0, 'ENST00000312090.10': 867853.0}	{'ENST00000325464.6': 868103.0, 'ENST00000395808.7': 868375.0, 'ENST00000312090.10': 868375.0}	{'ENST00000325464.6': '-', 'ENST00000395808.7': '-', 'ENST00000312090.10': '-'}	ENST00000312090.10	3UTR	protein_coding	74	chr19	867853	868375	-	['ENST00000325464.6', 'ENST00000395808.7', 'ENST00000312090.10']	['ENST00000325464.6']	ENST00000325464.6	3UTR	protein_coding	59	chr19	867963	868103	-	[]	['ENST00000325464.6', 'ENST00000395808.7', 'ENST00000312090.10']	ENST00000395808.7	3UTR	protein_coding	74	chr19	867630	868375	-	ENST00000325464.6	3UTR	protein_coding	59	chr19	867963	868103	-
Merged-chr19-21191360-1	chr19	21191323	21191397	+	0	{'ENST00000311048.11': '3UTR'}	{'ENST00000311048.11': 'protein_coding'}	{'ENST00000311048.11': 74}	{'ENST00000311048.11': 'chr19'}	{'ENST00000311048.11': 21184032.0}	{'ENST00000311048.11': 21196053.0}	{'ENST00000311048.11': '+'}	ENST00000311048.11	3UTR	protein_coding	74	chr19	21184032	21196053	+	['ENST00000311048.11']	['ENST00000311048.11']	ENST00000311048.11	3UTR	protein_coding	74	chr19	21184032	21196053	+	[]	['ENST00000311048.11']	ENST00000311048.11	3UTR	protein_coding	74	chr19	21184032	21196053	+	ENST00000311048.11	3UTR	protein_coding	74	chr19	21184032	21196053	+
Merged-chr19-42291226-1	chr19	42291189	42291263	+	0	{'ENST00000572681.6': 'exon'}	{'ENST00000572681.6': 'protein_coding'}	{'ENST00000572681.6': 74}	{'ENST00000572681.6': 'chr19'}	{'ENST00000572681.6': 42290233.0}	{'ENST00000572681.6': 42291466.0}	{'ENST00000572681.6': '+'}	ENST00000572681.6	exon	protein_coding	74	chr19	42290233	42291466	+	['ENST00000572681.6']	[]	ENST00000572681.6	exon	protein_coding	74	chr19	42290233	42291466	+	[]	[]	ENST00000572681.6	exon	protein_coding	74	chr19	42290233	42291466	+	ENST00000572681.6	exon	protein_coding	74	chr19	42290233	42291466	+
Merged-chr19-1827713-1	chr19	1827676	1827750	-	0	{'ENST00000170168.9': 'exon'}	{'ENST00000170168.9': 'protein_coding'}	{'ENST00000170168.9': 74}	{'ENST00000170168.9': 'chr19'}	{'ENST00000170168.9': 1826878.0}	{'ENST00000170168.9': 1828631.0}	{'ENST00000170168.9': '-'}	ENST00000170168.9	exon	protein_coding	74	chr19	1826878	1828631	-	['ENST00000170168.9']	['ENST00000170168.9']	ENST00000170168.9	exon	protein_coding	74	chr19	1826878	1828631	-	[]	[]	ENST00000170168.9	exon	protein_coding	74	chr19	1826878	1828631	-	ENST00000170168.9	exon	protein_coding	74	chr19	1826878	1828631	-
Merged-chr19-15401211-1	chr19	15401174	15401248	-	0	{'ENST00000397410.10': 'exon'}	{'ENST00000397410.10': 'protein_coding'}	{'ENST00000397410.10': 74}	{'ENST00000397410.10': 'chr19'}	{'ENST00000397410.10': 15401150.0}	{'ENST00000397410.10': 15401603.0}	{'ENST00000397410.10': '-'}	ENST00000397410.10	exon	protein_coding	74	chr19	15401150	15401603	-	['ENST00000397410.10']	['ENST00000397410.10']	ENST00000397410.10	exon	protein_coding	74	chr19	15401150	15401603	-	[]	[]	ENST00000397410.10	exon	protein_coding	74	chr19	15401150	15401603	-	ENST00000397410.10	exon	protein_coding	74	chr19	15401150	15401603	-
Merged-chr19-45769713-1	chr19	45769676	45769750	-	0	{'ENST00000291270.9': '3UTR', 'ENST00000447742.6': '3UTR', 'ENST00000590076.2': 'Intron'}	{'ENST00000291270.9': 'protein_coding', 'ENST00000447742.6': 'protein_coding', 'ENST00000590076.2': 'lncRNA'}	{'ENST00000291270.9': 34, 'ENST00000447742.6': 15, 'ENST00000590076.2': 74}	{'ENST00000291270.9': 'chr19', 'ENST00000447742.6': 'chr19', 'ENST00000590076.2': 'chr19'}	{'ENST00000291270.9': 45769717.0, 'ENST00000447742.6': 45769736.0, 'ENST00000590076.2': 45768131.0}	{'ENST00000291270.9': 45770490.0, 'ENST00000447742.6': 45770490.0, 'ENST00000590076.2': 45771489.0}	{'ENST00000291270.9': '-', 'ENST00000447742.6': '-', 'ENST00000590076.2': '+'}	ENST00000590076.2	Intron	lncRNA	74	chr19	45768131	45771489	+	['ENST00000291270.9', 'ENST00000447742.6', 'ENST00000590076.2']	['ENST00000291270.9']	ENST00000291270.9	3UTR	protein_coding	34	chr19	45769717	45770490	-	[]	['ENST00000291270.9', 'ENST00000447742.6']	ENST00000291270.9	3UTR	protein_coding	34	chr19	45769717	45770490	-	ENST00000291270.9	3UTR	protein_coding	34	chr19	45769717	45770490	-
Merged-chr19-46390831-1	chr19	46390794	46390868	+	0	{'ENST00000012443.9': '3UTR', 'ENST00000391919.1': '3UTR', 'ENST00000598616.1': 'exon'}	{'ENST00000012443.9': 'protein_coding', 'ENST00000391919.1': 'protein_coding', 'ENST00000598616.1': 'lncRNA'}	{'ENST00000012443.9': 74, 'ENST00000391919.1': 58, 'ENST00000598616.1': 58}	{'ENST00000012443.9': 'chr19', 'ENST00000391919.1': 'chr19', 'ENST00000598616.1': 'chr19'}	{'ENST00000012443.9': 46390344.0, 'ENST00000391919.1': 46390344.0, 'ENST00000598616.1': 46390739.0}	{'ENST00000012443.9': 46390975.0, 'ENST00000391919.1': 46390852.0, 'ENST00000598616.1': 46390852.0}	{'ENST00000012443.9': '+', 'ENST00000391919.1': '+', 'ENST00000598616.1': '-'}	ENST00000012443.9	3UTR	protein_coding	74	chr19	46390344	46390975	+	['ENST00000012443.9', 'ENST00000391919.1', 'ENST00000598616.1']	['ENST00000012443.9']	ENST00000012443.9	3UTR	protein_coding	74	chr19	46390344	46390975	+	[]	['ENST00000012443.9', 'ENST00000391919.1']	ENST00000012443.9	3UTR	protein_coding	74	chr19	46390344	46390975	+	ENST00000012443.9	3UTR	protein_coding	74	chr19	46390344	46390975	+
Merged-chr19-48459118-1	chr19	48459081	48459155	+	0	{'ENST00000342291.3': 'Intron'}	{'ENST00000342291.3': 'protein_coding'}	{'ENST00000342291.3': 74}	{'ENST00000342291.3': 'chr19'}	{'ENST00000342291.3': 48455858.0}	{'ENST00000342291.3': 48461669.0}	{'ENST00000342291.3': '+'}	ENST00000342291.3	Intron	protein_coding	74	chr19	48455858	48461669	+	['ENST00000342291.3']	['ENST00000342291.3']	ENST00000342291.3	Intron	protein_coding	74	chr19	48455858	48461669	+	[]	[]	ENST00000342291.3	Intron	protein_coding	74	chr19	48455858	48461669	+	ENST00000342291.3	Intron	protein_coding	74	chr19	48455858	48461669	+
Merged-chr19-49015916-1	chr19	49015879	49015953	+	0	{'ENST00000601968.5': 'exon', 'ENST00000595090.6': '3UTR'}	{'ENST00000601968.5': 'protein_coding', 'ENST00000595090.6': 'protein_coding'}	{'ENST00000601968.5': 13, 'ENST00000595090.6': 74}	{'ENST00000601968.5': 'chr19', 'ENST00000595090.6': 'chr19'}	{'ENST00000601968.5': 49015817.0, 'ENST00000595090.6': 49015840.0}	{'ENST00000601968.5': 49015892.0, 'ENST00000595090.6': 49015970.0}	{'ENST00000601968.5': '+', 'ENST00000595090.6': '+'}	ENST00000595090.6	3UTR	protein_coding	74	chr19	49015840	49015970	+	['ENST00000601968.5', 'ENST00000595090.6']	['ENST00000595090.6']	ENST00000595090.6	3UTR	protein_coding	74	chr19	49015840	49015970	+	[]	['ENST00000595090.6']	ENST00000595090.6	3UTR	protein_coding	74	chr19	49015840	49015970	+	ENST00000595090.6	3UTR	protein_coding	74	chr19	49015840	49015970	+
Merged-chr19-49555728-1	chr19	49555691	49555765	-	0	{'ENST00000596358.6': '3UTR', 'ENST00000339093.7': '3UTR'}	{'ENST00000596358.6': 'protein_coding', 'ENST00000339093.7': 'protein_coding'}	{'ENST00000596358.6': 62, 'ENST00000339093.7': 43}	{'ENST00000596358.6': 'chr19', 'ENST00000339093.7': 'chr19'}	{'ENST00000596358.6': 49555468.0, 'ENST00000339093.7': 49555711.0}	{'ENST00000596358.6': 49555753.0, 'ENST00000339093.7': 49555753.0}	{'ENST00000596358.6': '-', 'ENST00000339093.7': '-'}	ENST00000596358.6	3UTR	protein_coding	62	chr19	49555468	49555753	-	['ENST00000596358.6', 'ENST00000339093.7']	['ENST00000596358.6']	ENST00000596358.6	3UTR	protein_coding	62	chr19	49555468	49555753	-	[]	['ENST00000596358.6', 'ENST00000339093.7']	ENST00000596358.6	3UTR	protein_coding	62	chr19	49555468	49555753	-	ENST00000596358.6	3UTR	protein_coding	62	chr19	49555468	49555753	-
Merged-chr19-56160803-1	chr19	56160766	56160840	+	0	{'ENST00000337080.8': '3UTR', 'ENST00000592949.5': 'exon'}	{'ENST00000337080.8': 'protein_coding', 'ENST00000592949.5': 'protein_coding'}	{'ENST00000337080.8': 74, 'ENST00000592949.5': 74}	{'ENST00000337080.8': 'chr19', 'ENST00000592949.5': 'chr19'}	{'ENST00000337080.8': 56160199.0, 'ENST00000592949.5': 56159627.0}	{'ENST00000337080.8': 56160893.0, 'ENST00000592949.5': 56160893.0}	{'ENST00000337080.8': '+', 'ENST00000592949.5': '+'}	ENST00000337080.8	3UTR	protein_coding	74	chr19	56160199	56160893	+	['ENST00000337080.8', 'ENST00000592949.5']	['ENST00000337080.8']	ENST00000337080.8	3UTR	protein_coding	74	chr19	56160199	56160893	+	[]	['ENST00000337080.8']	ENST00000337080.8	3UTR	protein_coding	74	chr19	56160199	56160893	+	ENST00000337080.8	3UTR	protein_coding	74	chr19	56160199	56160893	+
Merged-chr19-4043984-1	chr19	4043947	4044021	-	0	{'ENST00000322357.9': '3UTR'}	{'ENST00000322357.9': 'protein_coding'}	{'ENST00000322357.9': 74}	{'ENST00000322357.9': 'chr19'}	{'ENST00000322357.9': 4043303.0}	{'ENST00000322357.9': 4047754.0}	{'ENST00000322357.9': '-'}	ENST00000322357.9	3UTR	protein_coding	74	chr19	4043303	4047754	-	['ENST00000322357.9']	['ENST00000322357.9']	ENST00000322357.9	3UTR	protein_coding	74	chr19	4043303	4047754	-	[]	['ENST00000322357.9']	ENST00000322357.9	3UTR	protein_coding	74	chr19	4043303	4047754	-	ENST00000322357.9	3UTR	protein_coding	74	chr19	4043303	4047754	-
Merged-chr19-10115448-1	chr19	10115411	10115485	-	0	{'ENST00000253108.9': 'Intron'}	{'ENST00000253108.9': 'protein_coding'}	{'ENST00000253108.9': 67}	{'ENST00000253108.9': 'chr19'}	{'ENST00000253108.9': 10115129.0}	{'ENST00000253108.9': 10115478.0}	{'ENST00000253108.9': '-'}	ENST00000253108.9	Intron	protein_coding	67	chr19	10115129	10115478	-	['ENST00000253108.9']	['ENST00000253108.9']	ENST00000253108.9	Intron	protein_coding	67	chr19	10115129	10115478	-	[]	[]	ENST00000253108.9	Intron	protein_coding	67	chr19	10115129	10115478	-	ENST00000253108.9	Intron	protein_coding	67	chr19	10115129	10115478	-
Merged-chr19-12954253-1	chr19	12954216	12954290	-	0	{'ENST00000316939.3': 'CDS'}	{'ENST00000316939.3': 'protein_coding'}	{'ENST00000316939.3': 74}	{'ENST00000316939.3': 'chr19'}	{'ENST00000316939.3': 12954211.0}	{'ENST00000316939.3': 12954526.0}	{'ENST00000316939.3': '-'}	ENST00000316939.3	CDS	protein_coding	74	chr19	12954211	12954526	-	['ENST00000316939.3']	['ENST00000316939.3']	ENST00000316939.3	CDS	protein_coding	74	chr19	12954211	12954526	-	[]	[]	ENST00000316939.3	CDS	protein_coding	74	chr19	12954211	12954526	-	ENST00000316939.3	CDS	protein_coding	74	chr19	12954211	12954526	-
Merged-chr19-24002988-1	chr19	24002951	24003025	-	0	{'Intergenic': 'Unlabeled'}	{'Intergenic': 'Intergenic'}	{'Intergenic': 0}	{'Intergenic': nan}	{'Intergenic': nan}	{'Intergenic': nan}	{'Intergenic': '-'}	Intergenic	Unlabeled	Intergenic	0				-	['Intergenic']	[]	Intergenic	Unlabeled	Intergenic	0				-	[]	[]	Intergenic	Unlabeled	Intergenic	0				-	Intergenic	Unlabeled	Intergenic	0				-
Merged-chr19-32582235-1	chr19	32582198	32582272	+	0	{'ENST00000590247.7': 'Intron', 'ENST00000379316.3': 'Intron'}	{'ENST00000590247.7': 'protein_coding', 'ENST00000379316.3': 'protein_coding'}	{'ENST00000590247.7': 41, 'ENST00000379316.3': 41}	{'ENST00000590247.7': 'chr19', 'ENST00000379316.3': 'chr19'}	{'ENST00000590247.7': 32582232.0, 'ENST00000379316.3': 32582232.0}	{'ENST00000590247.7': 32584949.0, 'ENST00000379316.3': 32587252.0}	{'ENST00000590247.7': '+', 'ENST00000379316.3': '+'}	ENST00000590247.7	Intron	protein_coding	41	chr19	32582232	32584949	+	['ENST00000590247.7', 'ENST00000379316.3']	['ENST00000590247.7']	ENST00000590247.7	Intron	protein_coding	41	chr19	32582232	32584949	+	[]	[]	ENST00000590247.7	Intron	protein_coding	41	chr19	32582232	32584949	+	ENST00000590247.7	Intron	protein_coding	41	chr19	32582232	32584949	+
Merged-chr19-35279720-1	chr19	35279683	35279757	+	0	{'ENST00000222305.8': '3UTR', 'ENST00000343550.9': '3UTR', 'ENST00000595068.5': '3UTR'}	{'ENST00000222305.8': 'protein_coding', 'ENST00000343550.9': 'protein_coding', 'ENST00000595068.5': 'protein_coding'}	{'ENST00000222305.8': 74, 'ENST00000343550.9': 74, 'ENST00000595068.5': 74}	{'ENST00000222305.8': 'chr19', 'ENST00000343550.9': 'chr19', 'ENST00000595068.5': 'chr19'}	{'ENST00000222305.8': 35279254.0, 'ENST00000343550.9': 35279254.0, 'ENST00000595068.5': 35279254.0}	{'ENST00000222305.8': 35279821.0, 'ENST00000343550.9': 35279815.0, 'ENST00000595068.5': 35279814.0}	{'ENST00000222305.8': '+', 'ENST00000343550.9': '+', 'ENST00000595068.5': '+'}	ENST00000222305.8	3UTR	protein_coding	74	chr19	35279254	35279821	+	['ENST00000222305.8', 'ENST00000343550.9', 'ENST00000595068.5']	['ENST00000222305.8']	ENST00000222305.8	3UTR	protein_coding	74	chr19	35279254	35279821	+	[]	['ENST00000222305.8', 'ENST00000343550.9', 'ENST00000595068.5']	ENST00000222305.8	3UTR	protein_coding	74	chr19	35279254	35279821	+	ENST00000222305.8	3UTR	protein_coding	74	chr19	35279254	35279821	+
Merged-chr19-38730531-1	chr19	38730494	38730568	+	0	{'ENST00000252699.7': '3UTR', 'ENST00000328867.9': '3UTR', 'ENST00000601953.5': '3UTR'}	{'ENST00000252699.7': 'protein_coding', 'ENST00000328867.9': 'protein_coding', 'ENST00000601953.5': 'protein_coding'}	{'ENST00000252699.7': 74, 'ENST00000328867.9': 74, 'ENST00000601953.5': 74}	{'ENST00000252699.7': 'chr19', 'ENST00000328867.9': 'chr19', 'ENST00000601953.5': 'chr19'}	{'ENST00000252699.7': 38729430.0, 'ENST00000328867.9': 38730192.0, 'ENST00000601953.5': 38730431.0}	{'ENST00000252699.7': 38731589.0, 'ENST00000328867.9': 38730854.0, 'ENST00000601953.5': 38730854.0}	{'ENST00000252699.7': '+', 'ENST00000328867.9': '-', 'ENST00000601953.5': '-'}	ENST00000601953.5	3UTR	protein_coding	74	chr19	38730431	38730854	-	['ENST00000252699.7', 'ENST00000328867.9', 'ENST00000601953.5']	['ENST00000252699.7', 'ENST00000328867.9']	ENST00000252699.7	3UTR	protein_coding	74	chr19	38729430	38731589	+	[]	['ENST00000252699.7', 'ENST00000328867.9', 'ENST00000601953.5']	ENST00000252699.7	3UTR	protein_coding	74	chr19	38729430	38731589	+	ENST00000252699.7	3UTR	protein_coding	74	chr19	38729430	38731589	+
Merged-chr19-41871414-1	chr19	41871377	41871451	+	0	{'ENST00000600467.6': '3UTR', 'ENST00000598742.6': '3UTR'}	{'ENST00000600467.6': 'protein_coding', 'ENST00000598742.6': 'protein_coding'}	{'ENST00000600467.6': 39, 'ENST00000598742.6': 74}	{'ENST00000600467.6': 'chr19', 'ENST00000598742.6': 'chr19'}	{'ENST00000600467.6': 41871375.0, 'ENST00000598742.6': 41871375.0}	{'ENST00000600467.6': 41871416.0, 'ENST00000598742.6': 41872925.0}	{'ENST00000600467.6': '+', 'ENST00000598742.6': '+'}	ENST00000598742.6	3UTR	protein_coding	74	chr19	41871375	41872925	+	['ENST00000600467.6', 'ENST00000598742.6']	['ENST00000598742.6']	ENST00000598742.6	3UTR	protein_coding	74	chr19	41871375	41872925	+	[]	['ENST00000600467.6', 'ENST00000598742.6']	ENST00000598742.6	3UTR	protein_coding	74	chr19	41871375	41872925	+	ENST00000598742.6	3UTR	protein_coding	74	chr19	41871375	41872925	+
Merged-chr19-45854371-1	chr19	45854334	45854408	-	0	{'ENST00000599814.5': 'exon', 'ENST00000245934.12': 'Intron'}	{'ENST00000599814.5': 'protein_coding', 'ENST00000245934.12': 'protein_coding'}	{'ENST00000599814.5': 18, 'ENST00000245934.12': 56}	{'ENST00000599814.5': 'chr19', 'ENST00000245934.12': 'chr19'}	{'ENST00000599814.5': 45854391.0, 'ENST00000245934.12': 45854240.0}	{'ENST00000599814.5': 45855710.0, 'ENST00000245934.12': 45854390.0}	{'ENST00000599814.5': '-', 'ENST00000245934.12': '-'}	ENST00000245934.12	Intron	protein_coding	56	chr19	45854240	45854390	-	['ENST00000599814.5', 'ENST00000245934.12']	['ENST00000245934.12']	ENST00000245934.12	Intron	protein_coding	56	chr19	45854240	45854390	-	[]	[]	ENST00000245934.12	Intron	protein_coding	56	chr19	45854240	45854390	-	ENST00000245934.12	Intron	protein_coding	56	chr19	45854240	45854390	-
Merged-chr19-50483398-1	chr19	50483361	50483435	+	0	{'ENST00000334976.11': '3UTR'}	{'ENST00000334976.11': 'protein_coding'}	{'ENST00000334976.11': 74}	{'ENST00000334976.11': 'chr19'}	{'ENST00000334976.11': 50482257.0}	{'ENST00000334976.11': 50490871.0}	{'ENST00000334976.11': '+'}	ENST00000334976.11	3UTR	protein_coding	74	chr19	50482257	50490871	+	['ENST00000334976.11']	['ENST00000334976.11']	ENST00000334976.11	3UTR	protein_coding	74	chr19	50482257	50490871	+	[]	['ENST00000334976.11']	ENST00000334976.11	3UTR	protein_coding	74	chr19	50482257	50490871	+	ENST00000334976.11	3UTR	protein_coding	74	chr19	50482257	50490871	+
Merged-chr19-51346959-1	chr19	51346922	51346996	-	0	{'ENST00000354232.8': 'exon', 'ENST00000600974.1': 'Intron'}	{'ENST00000354232.8': 'protein_coding', 'ENST00000600974.1': 'lncRNA'}	{'ENST00000354232.8': 74, 'ENST00000600974.1': 74}	{'ENST00000354232.8': 'chr19', 'ENST00000600974.1': 'chr19'}	{'ENST00000354232.8': 51346900.0, 'ENST00000600974.1': 51345246.0}	{'ENST00000354232.8': 51347058.0, 'ENST00000600974.1': 51353152.0}	{'ENST00000354232.8': '-', 'ENST00000600974.1': '+'}	ENST00000354232.8	exon	protein_coding	74	chr19	51346900	51347058	-	['ENST00000354232.8', 'ENST00000600974.1']	[]	ENST00000354232.8	exon	protein_coding	74	chr19	51346900	51347058	-	[]	[]	ENST00000354232.8	exon	protein_coding	74	chr19	51346900	51347058	-	ENST00000354232.8	exon	protein_coding	74	chr19	51346900	51347058	-
Merged-chr2-231455879-1	chr2	231455842	231455916	-	0	{'ENST00000384158.1': 'exon', 'ENST00000322723.9': 'Intron'}	{'ENST00000384158.1': 'snoRNA', 'ENST00000322723.9': 'protein_coding'}	{'ENST00000384158.1': 74, 'ENST00000322723.9': 74}	{'ENST00000384158.1': 'chr2', 'ENST00000322723.9': 'chr2'}	{'ENST00000384158.1': 231455800.0, 'ENST00000322723.9': 231455624.0}	{'ENST00000384158.1': 231455936.0, 'ENST00000322723.9': 231456009.0}	{'ENST00000384158.1': '-', 'ENST00000322723.9': '-'}	ENST00000384158.1	exon	snoRNA	74	chr2	231455800	231455936	-	['ENST00000384158.1', 'ENST00000322723.9']	['ENST00000322723.9']	ENST00000322723.9	Intron	protein_coding	74	chr2	231455624	231456009	-	[]	[]	ENST00000322723.9	Intron	protein_coding	74	chr2	231455624	231456009	-	ENST00000322723.9	Intron	protein_coding	74	chr2	231455624	231456009	-
Merged-chr2-70293671-1	chr2	70293634	70293708	-	0	{'ENST00000272348.7': '5UTR', 'ENST00000454893.1': '5UTR'}	{'ENST00000272348.7': 'protein_coding', 'ENST00000454893.1': 'protein_coding'}	{'ENST00000272348.7': 59, 'ENST00000454893.1': 59}	{'ENST00000272348.7': 'chr2', 'ENST00000454893.1': 'chr2'}	{'ENST00000272348.7': 70293650.0, 'ENST00000454893.1': 70293650.0}	{'ENST00000272348.7': 70293740.0, 'ENST00000454893.1': 70293711.0}	{'ENST00000272348.7': '-', 'ENST00000454893.1': '-'}	ENST00000272348.7	5UTR	protein_coding	59	chr2	70293650	70293740	-	['ENST00000272348.7', 'ENST00000454893.1']	['ENST00000272348.7']	ENST00000272348.7	5UTR	protein_coding	59	chr2	70293650	70293740	-	['ENST00000272348.7', 'ENST00000454893.1']	[]	ENST00000272348.7	5UTR	protein_coding	59	chr2	70293650	70293740	-	ENST00000272348.7	5UTR	protein_coding	59	chr2	70293650	70293740	-
Merged-chr2-200861337-1	chr2	200861300	200861374	-	0	{'ENST00000321356.9': 'exon'}	{'ENST00000321356.9': 'protein_coding'}	{'ENST00000321356.9': 74}	{'ENST00000321356.9': 'chr2'}	{'ENST00000321356.9': 200861238.0}	{'ENST00000321356.9': 200861466.0}	{'ENST00000321356.9': '-'}	ENST00000321356.9	exon	protein_coding	74	chr2	200861238	200861466	-	['ENST00000321356.9']	['ENST00000321356.9']	ENST00000321356.9	exon	protein_coding	74	chr2	200861238	200861466	-	[]	[]	ENST00000321356.9	exon	protein_coding	74	chr2	200861238	200861466	-	ENST00000321356.9	exon	protein_coding	74	chr2	200861238	200861466	-
Merged-chr2-55335085-1	chr2	55335048	55335122	-	0	{'ENST00000336838.10': 'exon', 'ENST00000670067.1': 'Intron', 'ENST00000599475.1': 'Intron'}	{'ENST00000336838.10': 'protein_coding', 'ENST00000670067.1': 'lncRNA', 'ENST00000599475.1': 'lncRNA'}	{'ENST00000336838.10': 74, 'ENST00000670067.1': 74, 'ENST00000599475.1': 74}	{'ENST00000336838.10': 'chr2', 'ENST00000670067.1': 'chr2', 'ENST00000599475.1': 'chr2'}	{'ENST00000336838.10': 55334094.0, 'ENST00000670067.1': 55332261.0, 'ENST00000599475.1': 55314251.0}	{'ENST00000336838.10': 55335164.0, 'ENST00000670067.1': 55339502.0, 'ENST00000599475.1': 55339502.0}	{'ENST00000336838.10': '-', 'ENST00000670067.1': '+', 'ENST00000599475.1': '+'}	ENST00000336838.10	exon	protein_coding	74	chr2	55334094	55335164	-	['ENST00000336838.10', 'ENST00000670067.1', 'ENST00000599475.1']	[]	ENST00000336838.10	exon	protein_coding	74	chr2	55334094	55335164	-	[]	[]	ENST00000336838.10	exon	protein_coding	74	chr2	55334094	55335164	-	ENST00000336838.10	exon	protein_coding	74	chr2	55334094	55335164	-
Merged-chr2-144520201-1	chr2	144520164	144520238	-	0	{'ENST00000636471.1': 'exon', 'ENST00000636026.2': 'exon', 'ENST00000675069.1': 'exon', 'ENST00000465070.5': 'exon', 'ENST00000609842.5': 'exon', 'ENST00000602006.5': 'exon', 'ENST00000610265.1': 'exon', 'ENST00000629520.2': 'Intron', 'ENST00000427278.8': 'Intron'}	{'ENST00000636471.1': 'protein_coding', 'ENST00000636026.2': 'protein_coding', 'ENST00000675069.1': 'protein_coding', 'ENST00000465070.5': 'protein_coding', 'ENST00000609842.5': 'lncRNA', 'ENST00000602006.5': 'lncRNA', 'ENST00000610265.1': 'lncRNA', 'ENST00000629520.2': 'protein_coding', 'ENST00000427278.8': 'lncRNA'}	{'ENST00000636471.1': 74, 'ENST00000636026.2': 74, 'ENST00000675069.1': 74, 'ENST00000465070.5': 74, 'ENST00000609842.5': 24, 'ENST00000602006.5': 24, 'ENST00000610265.1': 24, 'ENST00000629520.2': 74, 'ENST00000427278.8': 50}	{'ENST00000636471.1': 'chr2', 'ENST00000636026.2': 'chr2', 'ENST00000675069.1': 'chr2', 'ENST00000465070.5': 'chr2', 'ENST00000609842.5': 'chr2', 'ENST00000602006.5': 'chr2', 'ENST00000610265.1': 'chr2', 'ENST00000629520.2': 'chr2', 'ENST00000427278.8': 'chr2'}	{'ENST00000636471.1': 144519939.0, 'ENST00000636026.2': 144519939.0, 'ENST00000675069.1': 144520152.0, 'ENST00000465070.5': 144519939.0, 'ENST00000609842.5': 144520215.0, 'ENST00000602006.5': 144520215.0, 'ENST00000610265.1': 144520215.0, 'ENST00000629520.2': 144517419.0, 'ENST00000427278.8': 144520110.0}	{'ENST00000636471.1': 144520362.0, 'ENST00000636026.2': 144520398.0, 'ENST00000675069.1': 144520374.0, 'ENST00000465070.5': 144520332.0, 'ENST00000609842.5': 144520373.0, 'ENST00000602006.5': 144520285.0, 'ENST00000610265.1': 144520383.0, 'ENST00000629520.2': 144520351.0, 'ENST00000427278.8': 144520214.0}	{'ENST00000636471.1': '-', 'ENST00000636026.2': '-', 'ENST00000675069.1': '-', 'ENST00000465070.5': '-', 'ENST00000609842.5': '+', 'ENST00000602006.5': '+', 'ENST00000610265.1': '+', 'ENST00000629520.2': '-', 'ENST00000427278.8': '+'}	ENST00000675069.1	exon	protein_coding	74	chr2	144520152	144520374	-	['ENST00000636471.1', 'ENST00000636026.2', 'ENST00000675069.1', 'ENST00000465070.5', 'ENST00000609842.5', 'ENST00000602006.5', 'ENST00000610265.1', 'ENST00000629520.2', 'ENST00000427278.8']	[]	ENST00000675069.1	exon	protein_coding	74	chr2	144520152	144520374	-	[]	[]	ENST00000675069.1	exon	protein_coding	74	chr2	144520152	144520374	-	ENST00000675069.1	exon	protein_coding	74	chr2	144520152	144520374	-
Merged-chr2-166311695-1	chr2	166311658	166311732	-	0	{'ENST00000642356.2': 'CDS', 'ENST00000651574.1': 'Intron', 'ENST00000651013.1': 'Intron'}	{'ENST00000642356.2': 'protein_coding', 'ENST00000651574.1': 'lncRNA', 'ENST00000651013.1': 'lncRNA'}	{'ENST00000642356.2': 74, 'ENST00000651574.1': 74, 'ENST00000651013.1': 74}	{'ENST00000642356.2': 'chr2', 'ENST00000651574.1': 'chr2', 'ENST00000651013.1': 'chr2'}	{'ENST00000642356.2': 166311499.0, 'ENST00000651574.1': 166296129.0, 'ENST00000651013.1': 166296129.0}	{'ENST00000642356.2': 166311756.0, 'ENST00000651574.1': 166351596.0, 'ENST00000651013.1': 166375560.0}	{'ENST00000642356.2': '-', 'ENST00000651574.1': '+', 'ENST00000651013.1': '+'}	ENST00000642356.2	CDS	protein_coding	74	chr2	166311499	166311756	-	['ENST00000642356.2', 'ENST00000651574.1', 'ENST00000651013.1']	['ENST00000642356.2']	ENST00000642356.2	CDS	protein_coding	74	chr2	166311499	166311756	-	[]	[]	ENST00000642356.2	CDS	protein_coding	74	chr2	166311499	166311756	-	ENST00000642356.2	CDS	protein_coding	74	chr2	166311499	166311756	-
Merged-chr2-150469327-1	chr2	150469290	150469364	-	0	{'ENST00000375734.6': '3UTR', 'ENST00000409557.5': '3UTR'}	{'ENST00000375734.6': 'protein_coding', 'ENST00000409557.5': 'protein_coding'}	{'ENST00000375734.6': 74, 'ENST00000409557.5': 74}	{'ENST00000375734.6': 'chr2', 'ENST00000409557.5': 'chr2'}	{'ENST00000375734.6': 150468195.0, 'ENST00000409557.5': 150468209.0}	{'ENST00000375734.6': 150469989.0, 'ENST00000409557.5': 150469989.0}	{'ENST00000375734.6': '-', 'ENST00000409557.5': '-'}	ENST00000409557.5	3UTR	protein_coding	74	chr2	150468209	150469989	-	['ENST00000375734.6', 'ENST00000409557.5']	[]	ENST00000409557.5	3UTR	protein_coding	74	chr2	150468209	150469989	-	[]	['ENST00000375734.6', 'ENST00000409557.5']	ENST00000375734.6	3UTR	protein_coding	74	chr2	150468195	150469989	-	ENST00000409557.5	3UTR	protein_coding	74	chr2	150468209	150469989	-
Merged-chr2-27027173-1	chr2	27027136	27027210	+	0	{'ENST00000233121.7': '3UTR', 'ENST00000405074.7': '3UTR'}	{'ENST00000233121.7': 'protein_coding', 'ENST00000405074.7': 'protein_coding'}	{'ENST00000233121.7': 74, 'ENST00000405074.7': 60}	{'ENST00000233121.7': 'chr2', 'ENST00000405074.7': 'chr2'}	{'ENST00000233121.7': 27026346.0, 'ENST00000405074.7': 27026346.0}	{'ENST00000233121.7': 27027219.0, 'ENST00000405074.7': 27027196.0}	{'ENST00000233121.7': '+', 'ENST00000405074.7': '+'}	ENST00000233121.7	3UTR	protein_coding	74	chr2	27026346	27027219	+	['ENST00000233121.7', 'ENST00000405074.7']	['ENST00000233121.7']	ENST00000233121.7	3UTR	protein_coding	74	chr2	27026346	27027219	+	[]	['ENST00000233121.7', 'ENST00000405074.7']	ENST00000233121.7	3UTR	protein_coding	74	chr2	27026346	27027219	+	ENST00000233121.7	3UTR	protein_coding	74	chr2	27026346	27027219	+
Merged-chr2-232847573-1	chr2	232847536	232847610	+	0	{'ENST00000629305.2': 'Intron'}	{'ENST00000629305.2': 'protein_coding'}	{'ENST00000629305.2': 40}	{'ENST00000629305.2': 'chr2'}	{'ENST00000629305.2': 232847571.0}	{'ENST00000629305.2': 232850261.0}	{'ENST00000629305.2': '+'}	ENST00000629305.2	Intron	protein_coding	40	chr2	232847571	232850261	+	['ENST00000629305.2']	[]	ENST00000629305.2	Intron	protein_coding	40	chr2	232847571	232850261	+	[]	[]	ENST00000629305.2	Intron	protein_coding	40	chr2	232847571	232850261	+	ENST00000629305.2	Intron	protein_coding	40	chr2	232847571	232850261	+
Merged-chr2-24063586-1	chr2	24063549	24063623	+	0	{'ENST00000380991.8': '3UTR', 'ENST00000380986.9': '3UTR', 'ENST00000452109.1': '3UTR'}	{'ENST00000380991.8': 'protein_coding', 'ENST00000380986.9': 'protein_coding', 'ENST00000452109.1': 'protein_coding'}	{'ENST00000380991.8': 74, 'ENST00000380986.9': 74, 'ENST00000452109.1': 74}	{'ENST00000380991.8': 'chr2', 'ENST00000380986.9': 'chr2', 'ENST00000452109.1': 'chr2'}	{'ENST00000380991.8': 24063061.0, 'ENST00000380986.9': 24063190.0, 'ENST00000452109.1': 24063190.0}	{'ENST00000380991.8': 24063681.0, 'ENST00000380986.9': 24063681.0, 'ENST00000452109.1': 24063671.0}	{'ENST00000380991.8': '+', 'ENST00000380986.9': '+', 'ENST00000452109.1': '+'}	ENST00000380986.9	3UTR	protein_coding	74	chr2	24063190	24063681	+	['ENST00000380991.8', 'ENST00000380986.9', 'ENST00000452109.1']	['ENST00000380986.9']	ENST00000380986.9	3UTR	protein_coding	74	chr2	24063190	24063681	+	[]	['ENST00000380991.8', 'ENST00000380986.9', 'ENST00000452109.1']	ENST00000380991.8	3UTR	protein_coding	74	chr2	24063061	24063681	+	ENST00000380986.9	3UTR	protein_coding	74	chr2	24063190	24063681	+
Merged-chr2-70087706-1	chr2	70087669	70087743	+	0	{'ENST00000303577.7': '5UTR', 'ENST00000625518.2': 'Intron'}	{'ENST00000303577.7': 'protein_coding', 'ENST00000625518.2': 'lncRNA'}	{'ENST00000303577.7': 74, 'ENST00000625518.2': 74}	{'ENST00000303577.7': 'chr2', 'ENST00000625518.2': 'chr2'}	{'ENST00000303577.7': 70087477.0, 'ENST00000625518.2': 70085624.0}	{'ENST00000303577.7': 70087743.0, 'ENST00000625518.2': 70088409.0}	{'ENST00000303577.7': '+', 'ENST00000625518.2': '-'}	ENST00000303577.7	5UTR	protein_coding	74	chr2	70087477	70087743	+	['ENST00000303577.7', 'ENST00000625518.2']	['ENST00000303577.7']	ENST00000303577.7	5UTR	protein_coding	74	chr2	70087477	70087743	+	['ENST00000303577.7']	[]	ENST00000303577.7	5UTR	protein_coding	74	chr2	70087477	70087743	+	ENST00000303577.7	5UTR	protein_coding	74	chr2	70087477	70087743	+
Merged-chr2-105336596-1	chr2	105336559	105336633	-	0	{'ENST00000610036.2': 'exon'}	{'ENST00000610036.2': 'lncRNA'}	{'ENST00000610036.2': 74}	{'ENST00000610036.2': 'chr2'}	{'ENST00000610036.2': 105333935.0}	{'ENST00000610036.2': 105337509.0}	{'ENST00000610036.2': '-'}	ENST00000610036.2	exon	lncRNA	74	chr2	105333935	105337509	-	['ENST00000610036.2']	[]	ENST00000610036.2	exon	lncRNA	74	chr2	105333935	105337509	-	[]	[]	ENST00000610036.2	exon	lncRNA	74	chr2	105333935	105337509	-	ENST00000610036.2	exon	lncRNA	74	chr2	105333935	105337509	-
Merged-chr2-120179039-1	chr2	120179002	120179076	+	0	{'ENST00000263713.10': '3UTR', 'ENST00000452780.1': '3UTR', 'ENST00000455707.1': 'Intron'}	{'ENST00000263713.10': 'protein_coding', 'ENST00000452780.1': 'protein_coding', 'ENST00000455707.1': 'lncRNA'}	{'ENST00000263713.10': 74, 'ENST00000452780.1': 74, 'ENST00000455707.1': 74}	{'ENST00000263713.10': 'chr2', 'ENST00000452780.1': 'chr2', 'ENST00000455707.1': 'chr2'}	{'ENST00000263713.10': 120174905.0, 'ENST00000452780.1': 120174905.0, 'ENST00000455707.1': 120175857.0}	{'ENST00000263713.10': 120179119.0, 'ENST00000452780.1': 120179118.0, 'ENST00000455707.1': 120216339.0}	{'ENST00000263713.10': '+', 'ENST00000452780.1': '+', 'ENST00000455707.1': '-'}	ENST00000455707.1	Intron	lncRNA	74	chr2	120175857	120216339	-	['ENST00000263713.10', 'ENST00000452780.1', 'ENST00000455707.1']	['ENST00000263713.10']	ENST00000263713.10	3UTR	protein_coding	74	chr2	120174905	120179119	+	[]	['ENST00000263713.10', 'ENST00000452780.1']	ENST00000263713.10	3UTR	protein_coding	74	chr2	120174905	120179119	+	ENST00000263713.10	3UTR	protein_coding	74	chr2	120174905	120179119	+
Merged-chr2-127307200-1	chr2	127307163	127307237	-	0	{'ENST00000682094.1': '3UTR', 'ENST00000409947.5': '3UTR', 'ENST00000655875.1': 'Intron'}	{'ENST00000682094.1': 'protein_coding', 'ENST00000409947.5': 'protein_coding', 'ENST00000655875.1': 'lncRNA'}	{'ENST00000682094.1': 74, 'ENST00000409947.5': 74, 'ENST00000655875.1': 74}	{'ENST00000682094.1': 'chr2', 'ENST00000409947.5': 'chr2', 'ENST00000655875.1': 'chr2'}	{'ENST00000682094.1': 127298668.0, 'ENST00000409947.5': 127298730.0, 'ENST00000655875.1': 127301889.0}	{'ENST00000682094.1': 127307581.0, 'ENST00000409947.5': 127307581.0, 'ENST00000655875.1': 127362126.0}	{'ENST00000682094.1': '-', 'ENST00000409947.5': '-', 'ENST00000655875.1': '+'}	ENST00000655875.1	Intron	lncRNA	74	chr2	127301889	127362126	+	['ENST00000682094.1', 'ENST00000409947.5', 'ENST00000655875.1']	['ENST00000682094.1']	ENST00000682094.1	3UTR	protein_coding	74	chr2	127298668	127307581	-	[]	['ENST00000682094.1', 'ENST00000409947.5']	ENST00000682094.1	3UTR	protein_coding	74	chr2	127298668	127307581	-	ENST00000682094.1	3UTR	protein_coding	74	chr2	127298668	127307581	-
Merged-chr2-127349453-1	chr2	127349416	127349490	-	0	{'ENST00000655875.1': 'Intron', 'ENST00000682094.1': 'Intron', 'ENST00000409947.5': 'Intron'}	{'ENST00000655875.1': 'lncRNA', 'ENST00000682094.1': 'protein_coding', 'ENST00000409947.5': 'protein_coding'}	{'ENST00000655875.1': 74, 'ENST00000682094.1': 74, 'ENST00000409947.5': 74}	{'ENST00000655875.1': 'chr2', 'ENST00000682094.1': 'chr2', 'ENST00000409947.5': 'chr2'}	{'ENST00000655875.1': 127301889.0, 'ENST00000682094.1': 127343194.0, 'ENST00000409947.5': 127343194.0}	{'ENST00000655875.1': 127362126.0, 'ENST00000682094.1': 127387451.0, 'ENST00000409947.5': 127388247.0}	{'ENST00000655875.1': '+', 'ENST00000682094.1': '-', 'ENST00000409947.5': '-'}	ENST00000682094.1	Intron	protein_coding	74	chr2	127343194	127387451	-	['ENST00000655875.1', 'ENST00000682094.1', 'ENST00000409947.5']	['ENST00000682094.1']	ENST00000682094.1	Intron	protein_coding	74	chr2	127343194	127387451	-	[]	[]	ENST00000682094.1	Intron	protein_coding	74	chr2	127343194	127387451	-	ENST00000682094.1	Intron	protein_coding	74	chr2	127343194	127387451	-
Merged-chr2-174075028-1	chr2	174074991	174075065	-	0	{'ENST00000284719.8': '3UTR', 'ENST00000344357.9': '3UTR', 'ENST00000428402.6': '3UTR'}	{'ENST00000284719.8': 'protein_coding', 'ENST00000344357.9': 'protein_coding', 'ENST00000428402.6': 'protein_coding'}	{'ENST00000284719.8': 74, 'ENST00000344357.9': 58, 'ENST00000428402.6': 56}	{'ENST00000284719.8': 'chr2', 'ENST00000344357.9': 'chr2', 'ENST00000428402.6': 'chr2'}	{'ENST00000284719.8': 174072447.0, 'ENST00000344357.9': 174075008.0, 'ENST00000428402.6': 174075010.0}	{'ENST00000284719.8': 174075428.0, 'ENST00000344357.9': 174075428.0, 'ENST00000428402.6': 174075421.0}	{'ENST00000284719.8': '-', 'ENST00000344357.9': '-', 'ENST00000428402.6': '-'}	ENST00000284719.8	3UTR	protein_coding	74	chr2	174072447	174075428	-	['ENST00000284719.8', 'ENST00000344357.9', 'ENST00000428402.6']	['ENST00000284719.8']	ENST00000284719.8	3UTR	protein_coding	74	chr2	174072447	174075428	-	[]	['ENST00000284719.8', 'ENST00000344357.9', 'ENST00000428402.6']	ENST00000284719.8	3UTR	protein_coding	74	chr2	174072447	174075428	-	ENST00000284719.8	3UTR	protein_coding	74	chr2	174072447	174075428	-
Merged-chr2-189661583-1	chr2	189661546	189661620	+	0	{'ENST00000260952.9': 'exon', 'ENST00000607829.6': 'CDS', 'ENST00000606910.5': 'exon', 'ENST00000607062.5': 'Intron', 'ENST00000607535.5': 'Intron'}	{'ENST00000260952.9': 'protein_coding', 'ENST00000607829.6': 'protein_coding', 'ENST00000606910.5': 'protein_coding', 'ENST00000607062.5': 'protein_coding', 'ENST00000607535.5': 'protein_coding'}	{'ENST00000260952.9': 64, 'ENST00000607829.6': 64, 'ENST00000606910.5': 64, 'ENST00000607062.5': 11, 'ENST00000607535.5': 11}	{'ENST00000260952.9': 'chr2', 'ENST00000607829.6': 'chr2', 'ENST00000606910.5': 'chr2', 'ENST00000607062.5': 'chr2', 'ENST00000607535.5': 'chr2'}	{'ENST00000260952.9': 189661459.0, 'ENST00000607829.6': 189661521.0, 'ENST00000606910.5': 189661519.0, 'ENST00000607062.5': 189661610.0, 'ENST00000607535.5': 189661610.0}	{'ENST00000260952.9': 189661610.0, 'ENST00000607829.6': 189661610.0, 'ENST00000606910.5': 189661610.0, 'ENST00000607062.5': 189663900.0, 'ENST00000607535.5': 189665421.0}	{'ENST00000260952.9': '+', 'ENST00000607829.6': '+', 'ENST00000606910.5': '+', 'ENST00000607062.5': '+', 'ENST00000607535.5': '+'}	ENST00000607829.6	CDS	protein_coding	64	chr2	189661521	189661610	+	['ENST00000260952.9', 'ENST00000607829.6', 'ENST00000606910.5', 'ENST00000607062.5', 'ENST00000607535.5']	['ENST00000260952.9', 'ENST00000607829.6']	ENST00000607829.6	CDS	protein_coding	64	chr2	189661521	189661610	+	[]	[]	ENST00000607829.6	CDS	protein_coding	64	chr2	189661521	189661610	+	ENST00000607829.6	CDS	protein_coding	64	chr2	189661521	189661610	+
Merged-chr17-37610244-1	chr17	37610207	37610281	-	0	{'ENST00000617633.5': '3UTR', 'ENST00000619099.1': 'Intron'}	{'ENST00000617633.5': 'protein_coding', 'ENST00000619099.1': 'lncRNA'}	{'ENST00000617633.5': 74, 'ENST00000619099.1': 74}	{'ENST00000617633.5': 'chr17', 'ENST00000619099.1': 'chr17'}	{'ENST00000617633.5': 37609739.0, 'ENST00000619099.1': 37610168.0}	{'ENST00000617633.5': 37614298.0, 'ENST00000619099.1': 37613763.0}	{'ENST00000617633.5': '-', 'ENST00000619099.1': '+'}	ENST00000619099.1	Intron	lncRNA	74	chr17	37610168	37613763	+	['ENST00000617633.5', 'ENST00000619099.1']	['ENST00000617633.5']	ENST00000617633.5	3UTR	protein_coding	74	chr17	37609739	37614298	-	[]	['ENST00000617633.5']	ENST00000617633.5	3UTR	protein_coding	74	chr17	37609739	37614298	-	ENST00000617633.5	3UTR	protein_coding	74	chr17	37609739	37614298	-
Merged-chr17-46172046-1	chr17	46172009	46172083	-	0	{'ENST00000432791.7': 'CDS'}	{'ENST00000432791.7': 'protein_coding'}	{'ENST00000432791.7': 74}	{'ENST00000432791.7': 'chr17'}	{'ENST00000432791.7': 46170855.0}	{'ENST00000432791.7': 46172143.0}	{'ENST00000432791.7': '-'}	ENST00000432791.7	CDS	protein_coding	74	chr17	46170855	46172143	-	['ENST00000432791.7']	['ENST00000432791.7']	ENST00000432791.7	CDS	protein_coding	74	chr17	46170855	46172143	-	[]	[]	ENST00000432791.7	CDS	protein_coding	74	chr17	46170855	46172143	-	ENST00000432791.7	CDS	protein_coding	74	chr17	46170855	46172143	-
Merged-chr4-88278313-1	chr4	88278276	88278350	-	0	{'ENST00000608933.6': 'CDS', 'ENST00000508256.5': 'Intron'}	{'ENST00000608933.6': 'protein_coding', 'ENST00000508256.5': 'protein_coding'}	{'ENST00000608933.6': 74, 'ENST00000508256.5': 74}	{'ENST00000608933.6': 'chr4', 'ENST00000508256.5': 'chr4'}	{'ENST00000608933.6': 88278144.0, 'ENST00000508256.5': 88277243.0}	{'ENST00000608933.6': 88278583.0, 'ENST00000508256.5': 88284405.0}	{'ENST00000608933.6': '-', 'ENST00000508256.5': '-'}	ENST00000608933.6	CDS	protein_coding	74	chr4	88278144	88278583	-	['ENST00000608933.6', 'ENST00000508256.5']	['ENST00000608933.6']	ENST00000608933.6	CDS	protein_coding	74	chr4	88278144	88278583	-	[]	[]	ENST00000608933.6	CDS	protein_coding	74	chr4	88278144	88278583	-	ENST00000608933.6	CDS	protein_coding	74	chr4	88278144	88278583	-
Merged-chr4-103145137-1	chr4	103145100	103145174	-	0	{'ENST00000380026.8': 'exon'}	{'ENST00000380026.8': 'protein_coding'}	{'ENST00000380026.8': 74}	{'ENST00000380026.8': 'chr4'}	{'ENST00000380026.8': 103145050.0}	{'ENST00000380026.8': 103145334.0}	{'ENST00000380026.8': '-'}	ENST00000380026.8	exon	protein_coding	74	chr4	103145050	103145334	-	['ENST00000380026.8']	[]	ENST00000380026.8	exon	protein_coding	74	chr4	103145050	103145334	-	[]	[]	ENST00000380026.8	exon	protein_coding	74	chr4	103145050	103145334	-	ENST00000380026.8	exon	protein_coding	74	chr4	103145050	103145334	-
Merged-chr4-122362729-1	chr4	122362692	122362766	+	0	{'ENST00000679879.1': '3UTR', 'ENST00000388738.8': '3UTR'}	{'ENST00000679879.1': 'protein_coding', 'ENST00000388738.8': 'protein_coding'}	{'ENST00000679879.1': 60, 'ENST00000388738.8': 15}	{'ENST00000679879.1': 'chr4', 'ENST00000388738.8': 'chr4'}	{'ENST00000679879.1': 122362245.0, 'ENST00000388738.8': 122362245.0}	{'ENST00000679879.1': 122362752.0, 'ENST00000388738.8': 122362707.0}	{'ENST00000679879.1': '+', 'ENST00000388738.8': '+'}	ENST00000679879.1	3UTR	protein_coding	60	chr4	122362245	122362752	+	['ENST00000679879.1', 'ENST00000388738.8']	['ENST00000679879.1']	ENST00000679879.1	3UTR	protein_coding	60	chr4	122362245	122362752	+	[]	['ENST00000679879.1', 'ENST00000388738.8']	ENST00000679879.1	3UTR	protein_coding	60	chr4	122362245	122362752	+	ENST00000679879.1	3UTR	protein_coding	60	chr4	122362245	122362752	+
Merged-chr17-49052283-1	chr17	49052246	49052320	+	0	{'ENST00000290341.8': '3UTR'}	{'ENST00000290341.8': 'protein_coding'}	{'ENST00000290341.8': 74}	{'ENST00000290341.8': 'chr17'}	{'ENST00000290341.8': 49049442.0}	{'ENST00000290341.8': 49056145.0}	{'ENST00000290341.8': '+'}	ENST00000290341.8	3UTR	protein_coding	74	chr17	49049442	49056145	+	['ENST00000290341.8']	['ENST00000290341.8']	ENST00000290341.8	3UTR	protein_coding	74	chr17	49049442	49056145	+	[]	['ENST00000290341.8']	ENST00000290341.8	3UTR	protein_coding	74	chr17	49049442	49056145	+	ENST00000290341.8	3UTR	protein_coding	74	chr17	49049442	49056145	+
Merged-chr17-63819909-1	chr17	63819872	63819946	-	0	{'ENST00000427159.7': 'CDS'}	{'ENST00000427159.7': 'protein_coding'}	{'ENST00000427159.7': 74}	{'ENST00000427159.7': 'chr17'}	{'ENST00000427159.7': 63819805.0}	{'ENST00000427159.7': 63819994.0}	{'ENST00000427159.7': '-'}	ENST00000427159.7	CDS	protein_coding	74	chr17	63819805	63819994	-	['ENST00000427159.7']	['ENST00000427159.7']	ENST00000427159.7	CDS	protein_coding	74	chr17	63819805	63819994	-	[]	[]	ENST00000427159.7	CDS	protein_coding	74	chr17	63819805	63819994	-	ENST00000427159.7	CDS	protein_coding	74	chr17	63819805	63819994	-
Merged-chr17-82239879-1	chr17	82239842	82239916	-	0	{'ENST00000580098.6': '3UTR', 'ENST00000582743.6': '3UTR', 'ENST00000398519.9': '3UTR'}	{'ENST00000580098.6': 'protein_coding', 'ENST00000582743.6': 'protein_coding', 'ENST00000398519.9': 'protein_coding'}	{'ENST00000580098.6': 74, 'ENST00000582743.6': 74, 'ENST00000398519.9': 74}	{'ENST00000580098.6': 'chr17', 'ENST00000582743.6': 'chr17', 'ENST00000398519.9': 'chr17'}	{'ENST00000580098.6': 82238918.0, 'ENST00000582743.6': 82238974.0, 'ENST00000398519.9': 82239727.0}	{'ENST00000580098.6': 82240086.0, 'ENST00000582743.6': 82240086.0, 'ENST00000398519.9': 82239978.0}	{'ENST00000580098.6': '+', 'ENST00000582743.6': '+', 'ENST00000398519.9': '-'}	ENST00000398519.9	3UTR	protein_coding	74	chr17	82239727	82239978	-	['ENST00000580098.6', 'ENST00000582743.6', 'ENST00000398519.9']	['ENST00000582743.6']	ENST00000582743.6	3UTR	protein_coding	74	chr17	82238974	82240086	+	[]	['ENST00000580098.6', 'ENST00000582743.6', 'ENST00000398519.9']	ENST00000580098.6	3UTR	protein_coding	74	chr17	82238918	82240086	+	ENST00000582743.6	3UTR	protein_coding	74	chr17	82238974	82240086	+
Merged-chr4-2042826-1	chr4	2042789	2042863	+	0	{'ENST00000409248.10': 'Intron'}	{'ENST00000409248.10': 'protein_coding'}	{'ENST00000409248.10': 40}	{'ENST00000409248.10': 'chr4'}	{'ENST00000409248.10': 2042824.0}	{'ENST00000409248.10': 2043860.0}	{'ENST00000409248.10': '+'}	ENST00000409248.10	Intron	protein_coding	40	chr4	2042824	2043860	+	['ENST00000409248.10']	['ENST00000409248.10']	ENST00000409248.10	Intron	protein_coding	40	chr4	2042824	2043860	+	[]	[]	ENST00000409248.10	Intron	protein_coding	40	chr4	2042824	2043860	+	ENST00000409248.10	Intron	protein_coding	40	chr4	2042824	2043860	+
Merged-chr4-16256268-1	chr4	16256231	16256305	-	0	{'ENST00000573950.5': 'Intron', 'ENST00000570786.1': 'Intron'}	{'ENST00000573950.5': 'lncRNA', 'ENST00000570786.1': 'lncRNA'}	{'ENST00000573950.5': 74, 'ENST00000570786.1': 25}	{'ENST00000573950.5': 'chr4', 'ENST00000570786.1': 'chr4'}	{'ENST00000573950.5': 16238871.0, 'ENST00000570786.1': 16238871.0}	{'ENST00000573950.5': 16288883.0, 'ENST00000570786.1': 16256256.0}	{'ENST00000573950.5': '+', 'ENST00000570786.1': '+'}	ENST00000573950.5	Intron	lncRNA	74	chr4	16238871	16288883	+	['ENST00000573950.5', 'ENST00000570786.1']	[]	ENST00000573950.5	Intron	lncRNA	74	chr4	16238871	16288883	+	[]	[]	ENST00000573950.5	Intron	lncRNA	74	chr4	16238871	16288883	+	ENST00000573950.5	Intron	lncRNA	74	chr4	16238871	16288883	+
Merged-chr4-17810659-1	chr4	17810622	17810696	-	0	{'ENST00000382247.6': 'exon'}	{'ENST00000382247.6': 'protein_coding'}	{'ENST00000382247.6': 74}	{'ENST00000382247.6': 'chr4'}	{'ENST00000382247.6': 17810447.0}	{'ENST00000382247.6': 17810757.0}	{'ENST00000382247.6': '-'}	ENST00000382247.6	exon	protein_coding	74	chr4	17810447	17810757	-	['ENST00000382247.6']	['ENST00000382247.6']	ENST00000382247.6	exon	protein_coding	74	chr4	17810447	17810757	-	[]	[]	ENST00000382247.6	exon	protein_coding	74	chr4	17810447	17810757	-	ENST00000382247.6	exon	protein_coding	74	chr4	17810447	17810757	-
Merged-chr4-39532363-1	chr4	39532326	39532400	+	0	{'ENST00000504032.1': 'Intron'}	{'ENST00000504032.1': 'lncRNA'}	{'ENST00000504032.1': 74}	{'ENST00000504032.1': 'chr4'}	{'ENST00000504032.1': 39532130.0}	{'ENST00000504032.1': 39587922.0}	{'ENST00000504032.1': '+'}	ENST00000504032.1	Intron	lncRNA	74	chr4	39532130	39587922	+	['ENST00000504032.1']	[]	ENST00000504032.1	Intron	lncRNA	74	chr4	39532130	39587922	+	[]	[]	ENST00000504032.1	Intron	lncRNA	74	chr4	39532130	39587922	+	ENST00000504032.1	Intron	lncRNA	74	chr4	39532130	39587922	+
Merged-chr17-2684410-1	chr17	2684373	2684447	+	0	{'ENST00000397195.10': '3UTR', 'ENST00000674717.1': '3UTR', 'ENST00000676353.1': '3UTR', 'ENST00000610120.1': 'Intron'}	{'ENST00000397195.10': 'protein_coding', 'ENST00000674717.1': 'protein_coding', 'ENST00000676353.1': 'protein_coding', 'ENST00000610120.1': 'lncRNA'}	{'ENST00000397195.10': 74, 'ENST00000674717.1': 74, 'ENST00000676353.1': 74, 'ENST00000610120.1': 74}	{'ENST00000397195.10': 'chr17', 'ENST00000674717.1': 'chr17', 'ENST00000676353.1': 'chr17', 'ENST00000610120.1': 'chr17'}	{'ENST00000397195.10': 2681800.0, 'ENST00000674717.1': 2681800.0, 'ENST00000676353.1': 2681800.0, 'ENST00000610120.1': 2683712.0}	{'ENST00000397195.10': 2685615.0, 'ENST00000674717.1': 2685606.0, 'ENST00000676353.1': 2685608.0, 'ENST00000610120.1': 2684870.0}	{'ENST00000397195.10': '+', 'ENST00000674717.1': '+', 'ENST00000676353.1': '+', 'ENST00000610120.1': '-'}	ENST00000610120.1	Intron	lncRNA	74	chr17	2683712	2684870	-	['ENST00000397195.10', 'ENST00000674717.1', 'ENST00000676353.1', 'ENST00000610120.1']	['ENST00000397195.10']	ENST00000397195.10	3UTR	protein_coding	74	chr17	2681800	2685615	+	[]	['ENST00000397195.10', 'ENST00000674717.1', 'ENST00000676353.1']	ENST00000397195.10	3UTR	protein_coding	74	chr17	2681800	2685615	+	ENST00000397195.10	3UTR	protein_coding	74	chr17	2681800	2685615	+
Merged-chr17-6644449-1	chr17	6644412	6644486	-	0	{'ENST00000250101.10': '3UTR', 'ENST00000225728.8': '3UTR', 'ENST00000575197.1': '3UTR', 'ENST00000574128.1': '3UTR'}	{'ENST00000250101.10': 'protein_coding', 'ENST00000225728.8': 'protein_coding', 'ENST00000575197.1': 'protein_coding', 'ENST00000574128.1': 'protein_coding'}	{'ENST00000250101.10': 74, 'ENST00000225728.8': 57, 'ENST00000575197.1': 74, 'ENST00000574128.1': 57}	{'ENST00000250101.10': 'chr17', 'ENST00000225728.8': 'chr17', 'ENST00000575197.1': 'chr17', 'ENST00000574128.1': 'chr17'}	{'ENST00000250101.10': 6643017.0, 'ENST00000225728.8': 6643311.0, 'ENST00000575197.1': 6644279.0, 'ENST00000574128.1': 6644295.0}	{'ENST00000250101.10': 6644541.0, 'ENST00000225728.8': 6644469.0, 'ENST00000575197.1': 6644636.0, 'ENST00000574128.1': 6644469.0}	{'ENST00000250101.10': '+', 'ENST00000225728.8': '-', 'ENST00000575197.1': '-', 'ENST00000574128.1': '-'}	ENST00000575197.1	3UTR	protein_coding	74	chr17	6644279	6644636	-	['ENST00000250101.10', 'ENST00000225728.8', 'ENST00000575197.1', 'ENST00000574128.1']	['ENST00000250101.10', 'ENST00000225728.8']	ENST00000250101.10	3UTR	protein_coding	74	chr17	6643017	6644541	+	[]	['ENST00000250101.10', 'ENST00000225728.8', 'ENST00000575197.1', 'ENST00000574128.1']	ENST00000250101.10	3UTR	protein_coding	74	chr17	6643017	6644541	+	ENST00000250101.10	3UTR	protein_coding	74	chr17	6643017	6644541	+
Merged-chr17-18209862-1	chr17	18209825	18209899	+	0	{'ENST00000399138.5': '3UTR'}	{'ENST00000399138.5': 'protein_coding'}	{'ENST00000399138.5': 74}	{'ENST00000399138.5': 'chr17'}	{'ENST00000399138.5': 18208394.0}	{'ENST00000399138.5': 18209954.0}	{'ENST00000399138.5': '+'}	ENST00000399138.5	3UTR	protein_coding	74	chr17	18208394	18209954	+	['ENST00000399138.5']	['ENST00000399138.5']	ENST00000399138.5	3UTR	protein_coding	74	chr17	18208394	18209954	+	[]	['ENST00000399138.5']	ENST00000399138.5	3UTR	protein_coding	74	chr17	18208394	18209954	+	ENST00000399138.5	3UTR	protein_coding	74	chr17	18208394	18209954	+
Merged-chr17-18931243-1	chr17	18931206	18931280	+	0	{'ENST00000610773.4': '3UTR'}	{'ENST00000610773.4': 'protein_coding'}	{'ENST00000610773.4': 74}	{'ENST00000610773.4': 'chr17'}	{'ENST00000610773.4': 18930696.0}	{'ENST00000610773.4': 18931287.0}	{'ENST00000610773.4': '+'}	ENST00000610773.4	3UTR	protein_coding	74	chr17	18930696	18931287	+	['ENST00000610773.4']	[]	ENST00000610773.4	3UTR	protein_coding	74	chr17	18930696	18931287	+	[]	['ENST00000610773.4']	ENST00000610773.4	3UTR	protein_coding	74	chr17	18930696	18931287	+	ENST00000610773.4	3UTR	protein_coding	74	chr17	18930696	18931287	+
Merged-chr4-52714141-1	chr4	52714104	52714178	+	0	{'ENST00000441504.2': 'exon', 'ENST00000675705.1': 'Intron', 'ENST00000444958.2': 'Intron', 'ENST00000675988.1': 'Intron', 'ENST00000651729.1': 'Intron', 'ENST00000650700.1': 'Intron'}	{'ENST00000441504.2': 'lncRNA', 'ENST00000675705.1': 'lncRNA', 'ENST00000444958.2': 'lncRNA', 'ENST00000675988.1': 'lncRNA', 'ENST00000651729.1': 'lncRNA', 'ENST00000650700.1': 'lncRNA'}	{'ENST00000441504.2': 74, 'ENST00000675705.1': 74, 'ENST00000444958.2': 74, 'ENST00000675988.1': 74, 'ENST00000651729.1': 74, 'ENST00000650700.1': 74}	{'ENST00000441504.2': 'chr4', 'ENST00000675705.1': 'chr4', 'ENST00000444958.2': 'chr4', 'ENST00000675988.1': 'chr4', 'ENST00000651729.1': 'chr4', 'ENST00000650700.1': 'chr4'}	{'ENST00000441504.2': 52712824.0, 'ENST00000675705.1': 52712959.0, 'ENST00000444958.2': 52713542.0, 'ENST00000675988.1': 52713702.0, 'ENST00000651729.1': 52713206.0, 'ENST00000650700.1': 52712959.0}	{'ENST00000441504.2': 52718765.0, 'ENST00000675705.1': 52719867.0, 'ENST00000444958.2': 52714198.0, 'ENST00000675988.1': 52714198.0, 'ENST00000651729.1': 52722315.0, 'ENST00000650700.1': 52759377.0}	{'ENST00000441504.2': '+', 'ENST00000675705.1': '+', 'ENST00000444958.2': '+', 'ENST00000675988.1': '+', 'ENST00000651729.1': '-', 'ENST00000650700.1': '+'}	ENST00000675988.1	Intron	lncRNA	74	chr4	52713702	52714198	+	['ENST00000441504.2', 'ENST00000675705.1', 'ENST00000444958.2', 'ENST00000675988.1', 'ENST00000651729.1', 'ENST00000650700.1']	[]	ENST00000675988.1	Intron	lncRNA	74	chr4	52713702	52714198	+	[]	[]	ENST00000675988.1	Intron	lncRNA	74	chr4	52713702	52714198	+	ENST00000675988.1	Intron	lncRNA	74	chr4	52713702	52714198	+
Merged-chr4-82426040-1	chr4	82426003	82426077	-	0	{'ENST00000507721.5': '3UTR', 'ENST00000614627.4': 'Intron'}	{'ENST00000507721.5': 'protein_coding', 'ENST00000614627.4': 'protein_coding'}	{'ENST00000507721.5': 58, 'ENST00000614627.4': 33}	{'ENST00000507721.5': 'chr4', 'ENST00000614627.4': 'chr4'}	{'ENST00000507721.5': 82424625.0, 'ENST00000614627.4': 82424883.0}	{'ENST00000507721.5': 82426061.0, 'ENST00000614627.4': 82426036.0}	{'ENST00000507721.5': '-', 'ENST00000614627.4': '-'}	ENST00000507721.5	3UTR	protein_coding	58	chr4	82424625	82426061	-	['ENST00000507721.5', 'ENST00000614627.4']	[]	ENST00000507721.5	3UTR	protein_coding	58	chr4	82424625	82426061	-	[]	['ENST00000507721.5']	ENST00000507721.5	3UTR	protein_coding	58	chr4	82424625	82426061	-	ENST00000507721.5	3UTR	protein_coding	58	chr4	82424625	82426061	-
Merged-chr4-87473331-1	chr4	87473294	87473368	-	0	{'ENST00000282470.11': '3UTR', 'ENST00000418378.5': '3UTR'}	{'ENST00000282470.11': 'protein_coding', 'ENST00000418378.5': 'protein_coding'}	{'ENST00000282470.11': 34, 'ENST00000418378.5': 21}	{'ENST00000282470.11': 'chr4', 'ENST00000418378.5': 'chr4'}	{'ENST00000282470.11': 87473335.0, 'ENST00000418378.5': 87473348.0}	{'ENST00000282470.11': 87473777.0, 'ENST00000418378.5': 87473777.0}	{'ENST00000282470.11': '-', 'ENST00000418378.5': '-'}	ENST00000282470.11	3UTR	protein_coding	34	chr4	87473335	87473777	-	['ENST00000282470.11', 'ENST00000418378.5']	['ENST00000282470.11']	ENST00000282470.11	3UTR	protein_coding	34	chr4	87473335	87473777	-	[]	['ENST00000282470.11', 'ENST00000418378.5']	ENST00000282470.11	3UTR	protein_coding	34	chr4	87473335	87473777	-	ENST00000282470.11	3UTR	protein_coding	34	chr4	87473335	87473777	-
Merged-chr4-122334431-1	chr4	122334394	122334468	+	0	{'ENST00000679879.1': 'exon', 'ENST00000388738.8': 'Intron'}	{'ENST00000679879.1': 'protein_coding', 'ENST00000388738.8': 'protein_coding'}	{'ENST00000679879.1': 74, 'ENST00000388738.8': 29}	{'ENST00000679879.1': 'chr4', 'ENST00000388738.8': 'chr4'}	{'ENST00000679879.1': 122334344.0, 'ENST00000388738.8': 122334440.0}	{'ENST00000679879.1': 122334545.0, 'ENST00000388738.8': 122336191.0}	{'ENST00000679879.1': '+', 'ENST00000388738.8': '+'}	ENST00000679879.1	exon	protein_coding	74	chr4	122334344	122334545	+	['ENST00000679879.1', 'ENST00000388738.8']	['ENST00000679879.1']	ENST00000679879.1	exon	protein_coding	74	chr4	122334344	122334545	+	[]	[]	ENST00000679879.1	exon	protein_coding	74	chr4	122334344	122334545	+	ENST00000679879.1	exon	protein_coding	74	chr4	122334344	122334545	+
Merged-chr17-32350278-1	chr17	32350241	32350315	+	0	{'ENST00000321233.10': '5UTR', 'ENST00000394673.6': '5UTR', 'ENST00000394670.9': '5UTR', 'ENST00000342555.10': 'exon', 'ENST00000577908.5': '5UTR', 'ENST00000581915.5': 'Intron'}	{'ENST00000321233.10': 'protein_coding', 'ENST00000394673.6': 'protein_coding', 'ENST00000394670.9': 'protein_coding', 'ENST00000342555.10': 'protein_coding', 'ENST00000577908.5': 'protein_coding', 'ENST00000581915.5': 'lncRNA'}	{'ENST00000321233.10': 44, 'ENST00000394673.6': 44, 'ENST00000394670.9': 44, 'ENST00000342555.10': 74, 'ENST00000577908.5': 44, 'ENST00000581915.5': 35}	{'ENST00000321233.10': 'chr17', 'ENST00000394673.6': 'chr17', 'ENST00000394670.9': 'chr17', 'ENST00000342555.10': 'chr17', 'ENST00000577908.5': 'chr17', 'ENST00000581915.5': 'chr17'}	{'ENST00000321233.10': 32350132.0, 'ENST00000394673.6': 32350138.0, 'ENST00000394670.9': 32350157.0, 'ENST00000342555.10': 32350175.0, 'ENST00000577908.5': 32350180.0, 'ENST00000581915.5': 32324525.0}	{'ENST00000321233.10': 32350285.0, 'ENST00000394673.6': 32350285.0, 'ENST00000394670.9': 32350285.0, 'ENST00000342555.10': 32350326.0, 'ENST00000577908.5': 32350285.0, 'ENST00000581915.5': 32350276.0}	{'ENST00000321233.10': '+', 'ENST00000394673.6': '+', 'ENST00000394670.9': '+', 'ENST00000342555.10': '+', 'ENST00000577908.5': '+', 'ENST00000581915.5': '+'}	ENST00000342555.10	exon	protein_coding	74	chr17	32350175	32350326	+	['ENST00000321233.10', 'ENST00000394673.6', 'ENST00000394670.9', 'ENST00000342555.10', 'ENST00000577908.5', 'ENST00000581915.5']	['ENST00000394670.9']	ENST00000394670.9	5UTR	protein_coding	44	chr17	32350157	32350285	+	['ENST00000321233.10', 'ENST00000394673.6', 'ENST00000394670.9', 'ENST00000577908.5']	[]	ENST00000394670.9	5UTR	protein_coding	44	chr17	32350157	32350285	+	ENST00000321233.10	5UTR	protein_coding	44	chr17	32350132	32350285	+
Merged-chr17-38562816-1	chr17	38562779	38562853	-	0	{'ENST00000617146.5': 'Intron'}	{'ENST00000617146.5': 'protein_coding'}	{'ENST00000617146.5': 47}	{'ENST00000617146.5': 'chr17'}	{'ENST00000617146.5': 38562328.0}	{'ENST00000617146.5': 38562826.0}	{'ENST00000617146.5': '-'}	ENST00000617146.5	Intron	protein_coding	47	chr17	38562328	38562826	-	['ENST00000617146.5']	['ENST00000617146.5']	ENST00000617146.5	Intron	protein_coding	47	chr17	38562328	38562826	-	[]	[]	ENST00000617146.5	Intron	protein_coding	47	chr17	38562328	38562826	-	ENST00000617146.5	Intron	protein_coding	47	chr17	38562328	38562826	-
Merged-chr4-163494804-1	chr4	163494767	163494841	+	0	{'ENST00000513134.5': '5UTR', 'ENST00000358572.10': '5UTR', 'ENST00000508268.1': '5UTR', 'ENST00000513272.5': 'Intron'}	{'ENST00000513134.5': 'protein_coding', 'ENST00000358572.10': 'protein_coding', 'ENST00000508268.1': 'protein_coding', 'ENST00000513272.5': 'protein_coding'}	{'ENST00000513134.5': 34, 'ENST00000358572.10': 34, 'ENST00000508268.1': 34, 'ENST00000513272.5': 38}	{'ENST00000513134.5': 'chr4', 'ENST00000358572.10': 'chr4', 'ENST00000508268.1': 'chr4', 'ENST00000513272.5': 'chr4'}	{'ENST00000513134.5': 163494688.0, 'ENST00000358572.10': 163494690.0, 'ENST00000508268.1': 163494708.0, 'ENST00000513272.5': 163494804.0}	{'ENST00000513134.5': 163494801.0, 'ENST00000358572.10': 163494801.0, 'ENST00000508268.1': 163494801.0, 'ENST00000513272.5': 163507032.0}	{'ENST00000513134.5': '+', 'ENST00000358572.10': '+', 'ENST00000508268.1': '+', 'ENST00000513272.5': '+'}	ENST00000513272.5	Intron	protein_coding	38	chr4	163494804	163507032	+	['ENST00000513134.5', 'ENST00000358572.10', 'ENST00000508268.1', 'ENST00000513272.5']	['ENST00000358572.10']	ENST00000358572.10	5UTR	protein_coding	34	chr4	163494690	163494801	+	['ENST00000513134.5', 'ENST00000358572.10', 'ENST00000508268.1']	[]	ENST00000358572.10	5UTR	protein_coding	34	chr4	163494690	163494801	+	ENST00000513134.5	5UTR	protein_coding	34	chr4	163494688	163494801	+
Merged-chr4-184017694-1	chr4	184017657	184017731	+	0	{'ENST00000308497.9': '3UTR'}	{'ENST00000308497.9': 'protein_coding'}	{'ENST00000308497.9': 74}	{'ENST00000308497.9': 'chr4'}	{'ENST00000308497.9': 184017282.0}	{'ENST00000308497.9': 184023526.0}	{'ENST00000308497.9': '+'}	ENST00000308497.9	3UTR	protein_coding	74	chr4	184017282	184023526	+	['ENST00000308497.9']	['ENST00000308497.9']	ENST00000308497.9	3UTR	protein_coding	74	chr4	184017282	184023526	+	[]	['ENST00000308497.9']	ENST00000308497.9	3UTR	protein_coding	74	chr4	184017282	184023526	+	ENST00000308497.9	3UTR	protein_coding	74	chr4	184017282	184023526	+
Merged-chr4-185586836-1	chr4	185586799	185586873	-	0	{'ENST00000487836.6': '3UTR', 'ENST00000695409.1': '3UTR', 'ENST00000421420.6': '3UTR', 'ENST00000698843.1': '3UTR'}	{'ENST00000487836.6': 'protein_coding', 'ENST00000695409.1': 'protein_coding', 'ENST00000421420.6': 'protein_coding', 'ENST00000698843.1': 'protein_coding'}	{'ENST00000487836.6': 74, 'ENST00000695409.1': 74, 'ENST00000421420.6': 74, 'ENST00000698843.1': 74}	{'ENST00000487836.6': 'chr4', 'ENST00000695409.1': 'chr4', 'ENST00000421420.6': 'chr4', 'ENST00000698843.1': 'chr4'}	{'ENST00000487836.6': 185585444.0, 'ENST00000695409.1': 185585523.0, 'ENST00000421420.6': 185585529.0, 'ENST00000698843.1': 185585549.0}	{'ENST00000487836.6': 185587629.0, 'ENST00000695409.1': 185587629.0, 'ENST00000421420.6': 185587629.0, 'ENST00000698843.1': 185587629.0}	{'ENST00000487836.6': '-', 'ENST00000695409.1': '-', 'ENST00000421420.6': '-', 'ENST00000698843.1': '-'}	ENST00000698843.1	3UTR	protein_coding	74	chr4	185585549	185587629	-	['ENST00000487836.6', 'ENST00000695409.1', 'ENST00000421420.6', 'ENST00000698843.1']	[]	ENST00000698843.1	3UTR	protein_coding	74	chr4	185585549	185587629	-	[]	['ENST00000487836.6', 'ENST00000695409.1', 'ENST00000421420.6', 'ENST00000698843.1']	ENST00000487836.6	3UTR	protein_coding	74	chr4	185585444	185587629	-	ENST00000698843.1	3UTR	protein_coding	74	chr4	185585549	185587629	-
Merged-chr17-41983628-1	chr17	41983591	41983665	-	0	{'ENST00000316603.12': 'Intron', 'ENST00000589576.6': 'Intron'}	{'ENST00000316603.12': 'protein_coding', 'ENST00000589576.6': 'protein_coding'}	{'ENST00000316603.12': 30, 'ENST00000589576.6': 49}	{'ENST00000316603.12': 'chr17', 'ENST00000589576.6': 'chr17'}	{'ENST00000316603.12': 41983636.0, 'ENST00000589576.6': 41983617.0}	{'ENST00000316603.12': 41987818.0, 'ENST00000589576.6': 41988731.0}	{'ENST00000316603.12': '-', 'ENST00000589576.6': '-'}	ENST00000589576.6	Intron	protein_coding	49	chr17	41983617	41988731	-	['ENST00000316603.12', 'ENST00000589576.6']	[]	ENST00000589576.6	Intron	protein_coding	49	chr17	41983617	41988731	-	[]	[]	ENST00000589576.6	Intron	protein_coding	49	chr17	41983617	41988731	-	ENST00000589576.6	Intron	protein_coding	49	chr17	41983617	41988731	-
Merged-chr17-46193059-1	chr17	46193022	46193096	-	0	{'ENST00000432791.7': 'exon', 'ENST00000638275.1': 'exon', 'ENST00000572904.6': 'Intron'}	{'ENST00000432791.7': 'protein_coding', 'ENST00000638275.1': 'protein_coding', 'ENST00000572904.6': 'protein_coding'}	{'ENST00000432791.7': 74, 'ENST00000638275.1': 74, 'ENST00000572904.6': 74}	{'ENST00000432791.7': 'chr17', 'ENST00000638275.1': 'chr17', 'ENST00000572904.6': 'chr17'}	{'ENST00000432791.7': 46192823.0, 'ENST00000638275.1': 46192823.0, 'ENST00000572904.6': 46172232.0}	{'ENST00000432791.7': 46193429.0, 'ENST00000638275.1': 46193400.0, 'ENST00000572904.6': 46223670.0}	{'ENST00000432791.7': '-', 'ENST00000638275.1': '-', 'ENST00000572904.6': '-'}	ENST00000432791.7	exon	protein_coding	74	chr17	46192823	46193429	-	['ENST00000432791.7', 'ENST00000638275.1', 'ENST00000572904.6']	['ENST00000432791.7']	ENST00000432791.7	exon	protein_coding	74	chr17	46192823	46193429	-	[]	[]	ENST00000432791.7	exon	protein_coding	74	chr17	46192823	46193429	-	ENST00000432791.7	exon	protein_coding	74	chr17	46192823	46193429	-
Merged-chr17-46757467-1	chr17	46757430	46757504	+	0	{'ENST00000398238.8': '3UTR', 'ENST00000706391.1': '3UTR', 'ENST00000706392.1': 'exon', 'ENST00000465370.2': 'exon', 'ENST00000706395.1': '3UTR', 'ENST00000706400.1': '3UTR'}	{'ENST00000398238.8': 'protein_coding', 'ENST00000706391.1': 'protein_coding', 'ENST00000706392.1': 'protein_coding', 'ENST00000465370.2': 'protein_coding', 'ENST00000706395.1': 'protein_coding', 'ENST00000706400.1': 'protein_coding'}	{'ENST00000398238.8': 34, 'ENST00000706391.1': 15, 'ENST00000706392.1': 17, 'ENST00000465370.2': 20, 'ENST00000706395.1': 29, 'ENST00000706400.1': 74}	{'ENST00000398238.8': 'chr17', 'ENST00000706391.1': 'chr17', 'ENST00000706392.1': 'chr17', 'ENST00000465370.2': 'chr17', 'ENST00000706395.1': 'chr17', 'ENST00000706400.1': 'chr17'}	{'ENST00000398238.8': 46755821.0, 'ENST00000706391.1': 46755821.0, 'ENST00000706392.1': 46757223.0, 'ENST00000465370.2': 46755802.0, 'ENST00000706395.1': 46755821.0, 'ENST00000706400.1': 46755821.0}	{'ENST00000398238.8': 46757464.0, 'ENST00000706391.1': 46757445.0, 'ENST00000706392.1': 46757447.0, 'ENST00000465370.2': 46757450.0, 'ENST00000706395.1': 46757459.0, 'ENST00000706400.1': 46757679.0}	{'ENST00000398238.8': '+', 'ENST00000706391.1': '+', 'ENST00000706392.1': '+', 'ENST00000465370.2': '+', 'ENST00000706395.1': '+', 'ENST00000706400.1': '+'}	ENST00000706400.1	3UTR	protein_coding	74	chr17	46755821	46757679	+	['ENST00000398238.8', 'ENST00000706391.1', 'ENST00000706392.1', 'ENST00000465370.2', 'ENST00000706395.1', 'ENST00000706400.1']	['ENST00000398238.8']	ENST00000398238.8	3UTR	protein_coding	34	chr17	46755821	46757464	+	[]	['ENST00000398238.8', 'ENST00000706391.1', 'ENST00000706395.1', 'ENST00000706400.1']	ENST00000706400.1	3UTR	protein_coding	74	chr17	46755821	46757679	+	ENST00000398238.8	3UTR	protein_coding	34	chr17	46755821	46757464	+
Merged-chr17-47313468-1	chr17	47313431	47313505	-	0	{'ENST00000559488.7': '3UTR', 'ENST00000560629.1': 'Intron', 'ENST00000575039.1': 'Intron'}	{'ENST00000559488.7': 'protein_coding', 'ENST00000560629.1': 'protein_coding', 'ENST00000575039.1': 'lncRNA'}	{'ENST00000559488.7': 74, 'ENST00000560629.1': 74, 'ENST00000575039.1': 74}	{'ENST00000559488.7': 'chr17', 'ENST00000560629.1': 'chr17', 'ENST00000575039.1': 'chr17'}	{'ENST00000559488.7': 47310202.0, 'ENST00000560629.1': 47307637.0, 'ENST00000575039.1': 47303782.0}	{'ENST00000559488.7': 47313743.0, 'ENST00000560629.1': 47328268.0, 'ENST00000575039.1': 47318471.0}	{'ENST00000559488.7': '+', 'ENST00000560629.1': '+', 'ENST00000575039.1': '-'}	ENST00000559488.7	3UTR	protein_coding	74	chr17	47310202	47313743	+	['ENST00000559488.7', 'ENST00000560629.1', 'ENST00000575039.1']	['ENST00000559488.7']	ENST00000559488.7	3UTR	protein_coding	74	chr17	47310202	47313743	+	[]	['ENST00000559488.7']	ENST00000559488.7	3UTR	protein_coding	74	chr17	47310202	47313743	+	ENST00000559488.7	3UTR	protein_coding	74	chr17	47310202	47313743	+
Merged-chr17-50752646-1	chr17	50752609	50752683	+	0	{'ENST00000240304.5': 'exon', 'ENST00000505658.6': '3UTR'}	{'ENST00000240304.5': 'protein_coding', 'ENST00000505658.6': 'protein_coding'}	{'ENST00000240304.5': 74, 'ENST00000505658.6': 74}	{'ENST00000240304.5': 'chr17', 'ENST00000505658.6': 'chr17'}	{'ENST00000240304.5': 50752200.0, 'ENST00000505658.6': 50750659.0}	{'ENST00000240304.5': 50752709.0, 'ENST00000505658.6': 50756219.0}	{'ENST00000240304.5': '+', 'ENST00000505658.6': '+'}	ENST00000240304.5	exon	protein_coding	74	chr17	50752200	50752709	+	['ENST00000240304.5', 'ENST00000505658.6']	['ENST00000505658.6']	ENST00000505658.6	3UTR	protein_coding	74	chr17	50750659	50756219	+	[]	['ENST00000505658.6']	ENST00000505658.6	3UTR	protein_coding	74	chr17	50750659	50756219	+	ENST00000505658.6	3UTR	protein_coding	74	chr17	50750659	50756219	+
Merged-chr4-22387923-1	chr4	22387886	22387960	-	0	{'ENST00000334304.10': 'CDS'}	{'ENST00000334304.10': 'protein_coding'}	{'ENST00000334304.10': 74}	{'ENST00000334304.10': 'chr4'}	{'ENST00000334304.10': 22387708.0}	{'ENST00000334304.10': 22388947.0}	{'ENST00000334304.10': '-'}	ENST00000334304.10	CDS	protein_coding	74	chr4	22387708	22388947	-	['ENST00000334304.10']	['ENST00000334304.10']	ENST00000334304.10	CDS	protein_coding	74	chr4	22387708	22388947	-	[]	[]	ENST00000334304.10	CDS	protein_coding	74	chr4	22387708	22388947	-	ENST00000334304.10	CDS	protein_coding	74	chr4	22387708	22388947	-
Merged-chr4-39038766-1	chr4	39038729	39038803	-	0	{'Intergenic': 'Unlabeled'}	{'Intergenic': 'Intergenic'}	{'Intergenic': 0}	{'Intergenic': nan}	{'Intergenic': nan}	{'Intergenic': nan}	{'Intergenic': '-'}	Intergenic	Unlabeled	Intergenic	0				-	['Intergenic']	[]	Intergenic	Unlabeled	Intergenic	0				-	[]	[]	Intergenic	Unlabeled	Intergenic	0				-	Intergenic	Unlabeled	Intergenic	0				-
Merged-chr17-58089619-1	chr17	58089582	58089656	+	0	{'ENST00000579991.3': '3UTR'}	{'ENST00000579991.3': 'protein_coding'}	{'ENST00000579991.3': 74}	{'ENST00000579991.3': 'chr17'}	{'ENST00000579991.3': 58089277.0}	{'ENST00000579991.3': 58095542.0}	{'ENST00000579991.3': '+'}	ENST00000579991.3	3UTR	protein_coding	74	chr17	58089277	58095542	+	['ENST00000579991.3']	['ENST00000579991.3']	ENST00000579991.3	3UTR	protein_coding	74	chr17	58089277	58095542	+	[]	['ENST00000579991.3']	ENST00000579991.3	3UTR	protein_coding	74	chr17	58089277	58095542	+	ENST00000579991.3	3UTR	protein_coding	74	chr17	58089277	58095542	+
Merged-chr17-59201960-1	chr17	59201923	59201997	+	0	{'ENST00000262293.9': '3UTR', 'ENST00000614081.1': 'Intron', 'ENST00000577660.1': 'Intron'}	{'ENST00000262293.9': 'protein_coding', 'ENST00000614081.1': 'protein_coding', 'ENST00000577660.1': 'protein_coding'}	{'ENST00000262293.9': 74, 'ENST00000614081.1': 74, 'ENST00000577660.1': 74}	{'ENST00000262293.9': 'chr17', 'ENST00000614081.1': 'chr17', 'ENST00000577660.1': 'chr17'}	{'ENST00000262293.9': 59201629.0, 'ENST00000614081.1': 59201743.0, 'ENST00000577660.1': 59197789.0}	{'ENST00000262293.9': 59206709.0, 'ENST00000614081.1': 59203460.0, 'ENST00000577660.1': 59214804.0}	{'ENST00000262293.9': '+', 'ENST00000614081.1': '+', 'ENST00000577660.1': '+'}	ENST00000614081.1	Intron	protein_coding	74	chr17	59201743	59203460	+	['ENST00000262293.9', 'ENST00000614081.1', 'ENST00000577660.1']	['ENST00000262293.9']	ENST00000262293.9	3UTR	protein_coding	74	chr17	59201629	59206709	+	[]	['ENST00000262293.9']	ENST00000262293.9	3UTR	protein_coding	74	chr17	59201629	59206709	+	ENST00000262293.9	3UTR	protein_coding	74	chr17	59201629	59206709	+
Merged-chr17-59619692-1	chr17	59619655	59619729	+	0	{'ENST00000611877.1': 'exon', 'ENST00000700707.1': 'exon'}	{'ENST00000611877.1': 'lncRNA', 'ENST00000700707.1': 'protein_coding'}	{'ENST00000611877.1': 59, 'ENST00000700707.1': 46}	{'ENST00000611877.1': 'chr17', 'ENST00000700707.1': 'chr17'}	{'ENST00000611877.1': 59618553.0, 'ENST00000700707.1': 59619684.0}	{'ENST00000611877.1': 59619714.0, 'ENST00000700707.1': 59619767.0}	{'ENST00000611877.1': '-', 'ENST00000700707.1': '+'}	ENST00000611877.1	exon	lncRNA	59	chr17	59618553	59619714	-	['ENST00000611877.1', 'ENST00000700707.1']	[]	ENST00000611877.1	exon	lncRNA	59	chr17	59618553	59619714	-	[]	[]	ENST00000611877.1	exon	lncRNA	59	chr17	59618553	59619714	-	ENST00000611877.1	exon	lncRNA	59	chr17	59618553	59619714	-
Merged-chr17-59644352-1	chr17	59644315	59644389	+	0	{'ENST00000700707.1': 'exon', 'ENST00000700709.1': 'exon', 'ENST00000700712.1': 'AltUTR'}	{'ENST00000700707.1': 'protein_coding', 'ENST00000700709.1': 'protein_coding', 'ENST00000700712.1': 'protein_coding'}	{'ENST00000700707.1': 74, 'ENST00000700709.1': 74, 'ENST00000700712.1': 11}	{'ENST00000700707.1': 'chr17', 'ENST00000700709.1': 'chr17', 'ENST00000700712.1': 'chr17'}	{'ENST00000700707.1': 59644276.0, 'ENST00000700709.1': 59644276.0, 'ENST00000700712.1': 59644276.0}	{'ENST00000700707.1': 59644483.0, 'ENST00000700709.1': 59644495.0, 'ENST00000700712.1': 59644326.0}	{'ENST00000700707.1': '+', 'ENST00000700709.1': '+', 'ENST00000700712.1': '+'}	ENST00000700707.1	exon	protein_coding	74	chr17	59644276	59644483	+	['ENST00000700707.1', 'ENST00000700709.1', 'ENST00000700712.1']	[]	ENST00000700707.1	exon	protein_coding	74	chr17	59644276	59644483	+	[]	[]	ENST00000700707.1	exon	protein_coding	74	chr17	59644276	59644483	+	ENST00000700707.1	exon	protein_coding	74	chr17	59644276	59644483	+
Merged-chr17-60443173-1	chr17	60443136	60443210	-	0	{'ENST00000083182.8': '3UTR'}	{'ENST00000083182.8': 'protein_coding'}	{'ENST00000083182.8': 53}	{'ENST00000083182.8': 'chr17'}	{'ENST00000083182.8': 60443158.0}	{'ENST00000083182.8': 60447583.0}	{'ENST00000083182.8': '-'}	ENST00000083182.8	3UTR	protein_coding	53	chr17	60443158	60447583	-	['ENST00000083182.8']	['ENST00000083182.8']	ENST00000083182.8	3UTR	protein_coding	53	chr17	60443158	60447583	-	[]	['ENST00000083182.8']	ENST00000083182.8	3UTR	protein_coding	53	chr17	60443158	60447583	-	ENST00000083182.8	3UTR	protein_coding	53	chr17	60443158	60447583	-
Merged-chr17-64544186-1	chr17	64544149	64544223	-	0	{'ENST00000262435.14': '3UTR'}	{'ENST00000262435.14': 'protein_coding'}	{'ENST00000262435.14': 74}	{'ENST00000262435.14': 'chr17'}	{'ENST00000262435.14': 64542282.0}	{'ENST00000262435.14': 64545850.0}	{'ENST00000262435.14': '-'}	ENST00000262435.14	3UTR	protein_coding	74	chr17	64542282	64545850	-	['ENST00000262435.14']	['ENST00000262435.14']	ENST00000262435.14	3UTR	protein_coding	74	chr17	64542282	64545850	-	[]	['ENST00000262435.14']	ENST00000262435.14	3UTR	protein_coding	74	chr17	64542282	64545850	-	ENST00000262435.14	3UTR	protein_coding	74	chr17	64542282	64545850	-
Merged-chr17-67911940-1	chr17	67911903	67911977	+	0	{'ENST00000306378.11': 'exon'}	{'ENST00000306378.11': 'protein_coding'}	{'ENST00000306378.11': 74}	{'ENST00000306378.11': 'chr17'}	{'ENST00000306378.11': 67910877.0}	{'ENST00000306378.11': 67913187.0}	{'ENST00000306378.11': '+'}	ENST00000306378.11	exon	protein_coding	74	chr17	67910877	67913187	+	['ENST00000306378.11']	['ENST00000306378.11']	ENST00000306378.11	exon	protein_coding	74	chr17	67910877	67913187	+	[]	[]	ENST00000306378.11	exon	protein_coding	74	chr17	67910877	67913187	+	ENST00000306378.11	exon	protein_coding	74	chr17	67910877	67913187	+
Merged-chr4-110010942-1	chr4	110010905	110010979	+	0	{'ENST00000265171.10': 'Intron', 'ENST00000652245.1': 'Intron'}	{'ENST00000265171.10': 'protein_coding', 'ENST00000652245.1': 'protein_coding'}	{'ENST00000265171.10': 74, 'ENST00000652245.1': 74}	{'ENST00000265171.10': 'chr4', 'ENST00000652245.1': 'chr4'}	{'ENST00000265171.10': 110008230.0, 'ENST00000652245.1': 110004622.0}	{'ENST00000265171.10': 110011201.0, 'ENST00000652245.1': 110011201.0}	{'ENST00000265171.10': '+', 'ENST00000652245.1': '+'}	ENST00000265171.10	Intron	protein_coding	74	chr4	110008230	110011201	+	['ENST00000265171.10', 'ENST00000652245.1']	['ENST00000265171.10']	ENST00000265171.10	Intron	protein_coding	74	chr4	110008230	110011201	+	[]	[]	ENST00000265171.10	Intron	protein_coding	74	chr4	110008230	110011201	+	ENST00000265171.10	Intron	protein_coding	74	chr4	110008230	110011201	+
Merged-chr4-138170411-1	chr4	138170374	138170448	-	0	{'ENST00000510767.5': 'Intron', 'ENST00000280612.9': '3UTR'}	{'ENST00000510767.5': 'lncRNA', 'ENST00000280612.9': 'protein_coding'}	{'ENST00000510767.5': 74, 'ENST00000280612.9': 74}	{'ENST00000510767.5': 'chr4', 'ENST00000280612.9': 'chr4'}	{'ENST00000510767.5': 138168818.0, 'ENST00000280612.9': 138164097.0}	{'ENST00000510767.5': 138171532.0, 'ENST00000280612.9': 138171958.0}	{'ENST00000510767.5': '+', 'ENST00000280612.9': '-'}	ENST00000510767.5	Intron	lncRNA	74	chr4	138168818	138171532	+	['ENST00000510767.5', 'ENST00000280612.9']	['ENST00000280612.9']	ENST00000280612.9	3UTR	protein_coding	74	chr4	138164097	138171958	-	[]	['ENST00000280612.9']	ENST00000280612.9	3UTR	protein_coding	74	chr4	138164097	138171958	-	ENST00000280612.9	3UTR	protein_coding	74	chr4	138164097	138171958	-
Merged-chr4-143517397-1	chr4	143517360	143517434	+	0	{'ENST00000283131.4': 'Intron'}	{'ENST00000283131.4': 'protein_coding'}	{'ENST00000283131.4': 6}	{'ENST00000283131.4': 'chr4'}	{'ENST00000283131.4': 143517429.0}	{'ENST00000283131.4': 143521428.0}	{'ENST00000283131.4': '+'}	ENST00000283131.4	Intron	protein_coding	6	chr4	143517429	143521428	+	['ENST00000283131.4']	['ENST00000283131.4']	ENST00000283131.4	Intron	protein_coding	6	chr4	143517429	143521428	+	[]	[]	ENST00000283131.4	Intron	protein_coding	6	chr4	143517429	143521428	+	ENST00000283131.4	Intron	protein_coding	6	chr4	143517429	143521428	+
Merged-chr4-145514708-1	chr4	145514671	145514745	+	0	{'ENST00000302085.9': 'CDS', 'ENST00000513542.1': 'exon'}	{'ENST00000302085.9': 'protein_coding', 'ENST00000513542.1': 'lncRNA'}	{'ENST00000302085.9': 74, 'ENST00000513542.1': 74}	{'ENST00000302085.9': 'chr4', 'ENST00000513542.1': 'chr4'}	{'ENST00000302085.9': 145514614.0, 'ENST00000513542.1': 145514615.0}	{'ENST00000302085.9': 145515013.0, 'ENST00000513542.1': 145514990.0}	{'ENST00000302085.9': '+', 'ENST00000513542.1': '-'}	ENST00000513542.1	exon	lncRNA	74	chr4	145514615	145514990	-	['ENST00000302085.9', 'ENST00000513542.1']	['ENST00000302085.9']	ENST00000302085.9	CDS	protein_coding	74	chr4	145514614	145515013	+	[]	[]	ENST00000302085.9	CDS	protein_coding	74	chr4	145514614	145515013	+	ENST00000302085.9	CDS	protein_coding	74	chr4	145514614	145515013	+
Merged-chr17-68546741-1	chr17	68546704	68546778	+	0	{'ENST00000588188.7': 'Intron', 'ENST00000592554.2': 'Intron'}	{'ENST00000588188.7': 'protein_coding', 'ENST00000592554.2': 'protein_coding'}	{'ENST00000588188.7': 74, 'ENST00000592554.2': 74}	{'ENST00000588188.7': 'chr17', 'ENST00000592554.2': 'chr17'}	{'ENST00000588188.7': 68530001.0, 'ENST00000592554.2': 68543721.0}	{'ENST00000588188.7': 68551083.0, 'ENST00000592554.2': 68551872.0}	{'ENST00000588188.7': '+', 'ENST00000592554.2': '-'}	ENST00000592554.2	Intron	protein_coding	74	chr17	68543721	68551872	-	['ENST00000588188.7', 'ENST00000592554.2']	['ENST00000592554.2']	ENST00000592554.2	Intron	protein_coding	74	chr17	68543721	68551872	-	[]	[]	ENST00000592554.2	Intron	protein_coding	74	chr17	68543721	68551872	-	ENST00000592554.2	Intron	protein_coding	74	chr17	68543721	68551872	-
Merged-chr17-81457567-1	chr17	81457530	81457604	+	0	{'ENST00000675386.2': 'Intron'}	{'ENST00000675386.2': 'protein_coding'}	{'ENST00000675386.2': 13}	{'ENST00000675386.2': 'chr17'}	{'ENST00000675386.2': 81457592.0}	{'ENST00000675386.2': 81458164.0}	{'ENST00000675386.2': '+'}	ENST00000675386.2	Intron	protein_coding	13	chr17	81457592	81458164	+	['ENST00000675386.2']	['ENST00000675386.2']	ENST00000675386.2	Intron	protein_coding	13	chr17	81457592	81458164	+	[]	[]	ENST00000675386.2	Intron	protein_coding	13	chr17	81457592	81458164	+	ENST00000675386.2	Intron	protein_coding	13	chr17	81457592	81458164	+
Merged-chr17-81670308-1	chr17	81670271	81670345	+	0	{'ENST00000329214.13': 'exon'}	{'ENST00000329214.13': 'protein_coding'}	{'ENST00000329214.13': 74}	{'ENST00000329214.13': 'chr17'}	{'ENST00000329214.13': 81670225.0}	{'ENST00000329214.13': 81670453.0}	{'ENST00000329214.13': '+'}	ENST00000329214.13	exon	protein_coding	74	chr17	81670225	81670453	+	['ENST00000329214.13']	['ENST00000329214.13']	ENST00000329214.13	exon	protein_coding	74	chr17	81670225	81670453	+	[]	[]	ENST00000329214.13	exon	protein_coding	74	chr17	81670225	81670453	+	ENST00000329214.13	exon	protein_coding	74	chr17	81670225	81670453	+
Merged-chr17-82253022-1	chr17	82252985	82253059	-	0	{'ENST00000398519.9': 'Intron'}	{'ENST00000398519.9': 'protein_coding'}	{'ENST00000398519.9': 30}	{'ENST00000398519.9': 'chr17'}	{'ENST00000398519.9': 82252604.0}	{'ENST00000398519.9': 82253015.0}	{'ENST00000398519.9': '-'}	ENST00000398519.9	Intron	protein_coding	30	chr17	82252604	82253015	-	['ENST00000398519.9']	[]	ENST00000398519.9	Intron	protein_coding	30	chr17	82252604	82253015	-	[]	[]	ENST00000398519.9	Intron	protein_coding	30	chr17	82252604	82253015	-	ENST00000398519.9	Intron	protein_coding	30	chr17	82252604	82253015	-
Merged-chr4-158124600-1	chr4	158124563	158124637	-	0	{'ENST00000585682.6': '3UTR', 'ENST00000296530.12': '3UTR'}	{'ENST00000585682.6': 'protein_coding', 'ENST00000296530.12': 'protein_coding'}	{'ENST00000585682.6': 74, 'ENST00000296530.12': 34}	{'ENST00000585682.6': 'chr4', 'ENST00000296530.12': 'chr4'}	{'ENST00000585682.6': 158124474.0, 'ENST00000296530.12': 158124604.0}	{'ENST00000585682.6': 158127409.0, 'ENST00000296530.12': 158127409.0}	{'ENST00000585682.6': '-', 'ENST00000296530.12': '-'}	ENST00000585682.6	3UTR	protein_coding	74	chr4	158124474	158127409	-	['ENST00000585682.6', 'ENST00000296530.12']	['ENST00000585682.6']	ENST00000585682.6	3UTR	protein_coding	74	chr4	158124474	158127409	-	[]	['ENST00000585682.6', 'ENST00000296530.12']	ENST00000585682.6	3UTR	protein_coding	74	chr4	158124474	158127409	-	ENST00000585682.6	3UTR	protein_coding	74	chr4	158124474	158127409	-
Merged-chr4-185501747-1	chr4	185501710	185501784	-	0	{'ENST00000284767.12': '3UTR', 'ENST00000284770.10': '3UTR', 'ENST00000669100.1': 'Intron'}	{'ENST00000284767.12': 'protein_coding', 'ENST00000284770.10': 'protein_coding', 'ENST00000669100.1': 'lncRNA'}	{'ENST00000284767.12': 74, 'ENST00000284770.10': 74, 'ENST00000669100.1': 74}	{'ENST00000284767.12': 'chr4', 'ENST00000284770.10': 'chr4', 'ENST00000669100.1': 'chr4'}	{'ENST00000284767.12': 185500660.0, 'ENST00000284770.10': 185501697.0, 'ENST00000669100.1': 185485008.0}	{'ENST00000284767.12': 185502296.0, 'ENST00000284770.10': 185502296.0, 'ENST00000669100.1': 185502792.0}	{'ENST00000284767.12': '-', 'ENST00000284770.10': '-', 'ENST00000669100.1': '+'}	ENST00000284770.10	3UTR	protein_coding	74	chr4	185501697	185502296	-	['ENST00000284767.12', 'ENST00000284770.10', 'ENST00000669100.1']	['ENST00000284767.12']	ENST00000284767.12	3UTR	protein_coding	74	chr4	185500660	185502296	-	[]	['ENST00000284767.12', 'ENST00000284770.10']	ENST00000284767.12	3UTR	protein_coding	74	chr4	185500660	185502296	-	ENST00000284767.12	3UTR	protein_coding	74	chr4	185500660	185502296	-
Merged-chr4-6820150-1	chr4	6820113	6820187	+	0	{'ENST00000307659.6': 'Intron', 'ENST00000425103.5': 'Intron'}	{'ENST00000307659.6': 'protein_coding', 'ENST00000425103.5': 'protein_coding'}	{'ENST00000307659.6': 74, 'ENST00000425103.5': 74}	{'ENST00000307659.6': 'chr4', 'ENST00000425103.5': 'chr4'}	{'ENST00000307659.6': 6804606.0, 'ENST00000425103.5': 6782841.0}	{'ENST00000307659.6': 6824184.0, 'ENST00000425103.5': 6824184.0}	{'ENST00000307659.6': '+', 'ENST00000425103.5': '+'}	ENST00000307659.6	Intron	protein_coding	74	chr4	6804606	6824184	+	['ENST00000307659.6', 'ENST00000425103.5']	['ENST00000307659.6']	ENST00000307659.6	Intron	protein_coding	74	chr4	6804606	6824184	+	[]	[]	ENST00000307659.6	Intron	protein_coding	74	chr4	6804606	6824184	+	ENST00000307659.6	Intron	protein_coding	74	chr4	6804606	6824184	+
Merged-chr17-1585918-1	chr17	1585881	1585955	-	0	{'ENST00000301335.10': 'Intron'}	{'ENST00000301335.10': 'protein_coding'}	{'ENST00000301335.10': 31}	{'ENST00000301335.10': 'chr17'}	{'ENST00000301335.10': 1583336.0}	{'ENST00000301335.10': 1585912.0}	{'ENST00000301335.10': '-'}	ENST00000301335.10	Intron	protein_coding	31	chr17	1583336	1585912	-	['ENST00000301335.10']	['ENST00000301335.10']	ENST00000301335.10	Intron	protein_coding	31	chr17	1583336	1585912	-	[]	[]	ENST00000301335.10	Intron	protein_coding	31	chr17	1583336	1585912	-	ENST00000301335.10	Intron	protein_coding	31	chr17	1583336	1585912	-
Merged-chr17-1650643-1	chr17	1650606	1650680	-	0	{'ENST00000304992.11': '3UTR', 'ENST00000572621.5': '3UTR', 'ENST00000573725.2': '3UTR', 'ENST00000703540.1': '3UTR'}	{'ENST00000304992.11': 'protein_coding', 'ENST00000572621.5': 'protein_coding', 'ENST00000573725.2': 'protein_coding', 'ENST00000703540.1': 'protein_coding'}	{'ENST00000304992.11': 52, 'ENST00000572621.5': 50, 'ENST00000573725.2': 29, 'ENST00000703540.1': 20}	{'ENST00000304992.11': 'chr17', 'ENST00000572621.5': 'chr17', 'ENST00000573725.2': 'chr17', 'ENST00000703540.1': 'chr17'}	{'ENST00000304992.11': 1650629.0, 'ENST00000572621.5': 1650631.0, 'ENST00000573725.2': 1650652.0, 'ENST00000703540.1': 1650661.0}	{'ENST00000304992.11': 1650804.0, 'ENST00000572621.5': 1650804.0, 'ENST00000573725.2': 1650804.0, 'ENST00000703540.1': 1650804.0}	{'ENST00000304992.11': '-', 'ENST00000572621.5': '-', 'ENST00000573725.2': '-', 'ENST00000703540.1': '-'}	ENST00000304992.11	3UTR	protein_coding	52	chr17	1650629	1650804	-	['ENST00000304992.11', 'ENST00000572621.5', 'ENST00000573725.2', 'ENST00000703540.1']	['ENST00000304992.11']	ENST00000304992.11	3UTR	protein_coding	52	chr17	1650629	1650804	-	[]	['ENST00000304992.11', 'ENST00000572621.5', 'ENST00000573725.2', 'ENST00000703540.1']	ENST00000304992.11	3UTR	protein_coding	52	chr17	1650629	1650804	-	ENST00000304992.11	3UTR	protein_coding	52	chr17	1650629	1650804	-
Merged-chr17-2665468-1	chr17	2665431	2665505	+	0	{'ENST00000397195.10': 'Intron', 'ENST00000674717.1': 'Intron', 'ENST00000676353.1': 'Intron'}	{'ENST00000397195.10': 'protein_coding', 'ENST00000674717.1': 'protein_coding', 'ENST00000676353.1': 'protein_coding'}	{'ENST00000397195.10': 50, 'ENST00000674717.1': 74, 'ENST00000676353.1': 74}	{'ENST00000397195.10': 'chr17', 'ENST00000674717.1': 'chr17', 'ENST00000676353.1': 'chr17'}	{'ENST00000397195.10': 2665456.0, 'ENST00000674717.1': 2638320.0, 'ENST00000676353.1': 2638320.0}	{'ENST00000397195.10': 2666015.0, 'ENST00000674717.1': 2666991.0, 'ENST00000676353.1': 2666015.0}	{'ENST00000397195.10': '+', 'ENST00000674717.1': '+', 'ENST00000676353.1': '+'}	ENST00000674717.1	Intron	protein_coding	74	chr17	2638320	2666991	+	['ENST00000397195.10', 'ENST00000674717.1', 'ENST00000676353.1']	['ENST00000397195.10']	ENST00000397195.10	Intron	protein_coding	50	chr17	2665456	2666015	+	[]	[]	ENST00000397195.10	Intron	protein_coding	50	chr17	2665456	2666015	+	ENST00000397195.10	Intron	protein_coding	50	chr17	2665456	2666015	+
Merged-chr17-6071177-1	chr17	6071140	6071214	+	0	{'ENST00000574946.5': 'Intron', 'ENST00000573634.5': 'Intron', 'ENST00000317744.10': 'Intron', 'ENST00000574232.5': 'Intron', 'ENST00000573619.1': 'Intron'}	{'ENST00000574946.5': 'protein_coding', 'ENST00000573634.5': 'protein_coding', 'ENST00000317744.10': 'protein_coding', 'ENST00000574232.5': 'protein_coding', 'ENST00000573619.1': 'protein_coding'}	{'ENST00000574946.5': 74, 'ENST00000573634.5': 74, 'ENST00000317744.10': 74, 'ENST00000574232.5': 44, 'ENST00000573619.1': 74}	{'ENST00000574946.5': 'chr17', 'ENST00000573634.5': 'chr17', 'ENST00000317744.10': 'chr17', 'ENST00000574232.5': 'chr17', 'ENST00000573619.1': 'chr17'}	{'ENST00000574946.5': 6069207.0, 'ENST00000573634.5': 6069311.0, 'ENST00000317744.10': 6070652.0, 'ENST00000574232.5': 6071171.0, 'ENST00000573619.1': 5990021.0}	{'ENST00000574946.5': 6080370.0, 'ENST00000573634.5': 6087989.0, 'ENST00000317744.10': 6080370.0, 'ENST00000574232.5': 6080370.0, 'ENST00000573619.1': 6080370.0}	{'ENST00000574946.5': '+', 'ENST00000573634.5': '+', 'ENST00000317744.10': '+', 'ENST00000574232.5': '+', 'ENST00000573619.1': '+'}	ENST00000317744.10	Intron	protein_coding	74	chr17	6070652	6080370	+	['ENST00000574946.5', 'ENST00000573634.5', 'ENST00000317744.10', 'ENST00000574232.5', 'ENST00000573619.1']	['ENST00000317744.10']	ENST00000317744.10	Intron	protein_coding	74	chr17	6070652	6080370	+	[]	[]	ENST00000317744.10	Intron	protein_coding	74	chr17	6070652	6080370	+	ENST00000317744.10	Intron	protein_coding	74	chr17	6070652	6080370	+
Merged-chr4-17800665-1	chr4	17800628	17800702	-	0	{'ENST00000382247.6': '3UTR'}	{'ENST00000382247.6': 'protein_coding'}	{'ENST00000382247.6': 48}	{'ENST00000382247.6': 'chr4'}	{'ENST00000382247.6': 17800655.0}	{'ENST00000382247.6': 17803493.0}	{'ENST00000382247.6': '-'}	ENST00000382247.6	3UTR	protein_coding	48	chr4	17800655	17803493	-	['ENST00000382247.6']	['ENST00000382247.6']	ENST00000382247.6	3UTR	protein_coding	48	chr4	17800655	17803493	-	[]	['ENST00000382247.6']	ENST00000382247.6	3UTR	protein_coding	48	chr4	17800655	17803493	-	ENST00000382247.6	3UTR	protein_coding	48	chr4	17800655	17803493	-
Merged-chr4-26435014-1	chr4	26434977	26435051	+	0	{'ENST00000342320.8': '3UTR'}	{'ENST00000342320.8': 'protein_coding'}	{'ENST00000342320.8': 74}	{'ENST00000342320.8': 'chr4'}	{'ENST00000342320.8': 26431005.0}	{'ENST00000342320.8': 26435131.0}	{'ENST00000342320.8': '+'}	ENST00000342320.8	3UTR	protein_coding	74	chr4	26431005	26435131	+	['ENST00000342320.8']	[]	ENST00000342320.8	3UTR	protein_coding	74	chr4	26431005	26435131	+	[]	['ENST00000342320.8']	ENST00000342320.8	3UTR	protein_coding	74	chr4	26431005	26435131	+	ENST00000342320.8	3UTR	protein_coding	74	chr4	26431005	26435131	+
Merged-chr4-41261784-1	chr4	41261747	41261821	+	0	{'ENST00000503431.5': 'Intron', 'ENST00000508768.5': 'Intron'}	{'ENST00000503431.5': 'protein_coding', 'ENST00000508768.5': 'protein_coding'}	{'ENST00000503431.5': 22, 'ENST00000508768.5': 22}	{'ENST00000503431.5': 'chr4', 'ENST00000508768.5': 'chr4'}	{'ENST00000503431.5': 41261800.0, 'ENST00000508768.5': 41261800.0}	{'ENST00000503431.5': 41261875.0, 'ENST00000508768.5': 41263224.0}	{'ENST00000503431.5': '+', 'ENST00000508768.5': '+'}	ENST00000503431.5	Intron	protein_coding	22	chr4	41261800	41261875	+	['ENST00000503431.5', 'ENST00000508768.5']	[]	ENST00000503431.5	Intron	protein_coding	22	chr4	41261800	41261875	+	[]	[]	ENST00000503431.5	Intron	protein_coding	22	chr4	41261800	41261875	+	ENST00000503431.5	Intron	protein_coding	22	chr4	41261800	41261875	+
Merged-chr4-42164247-1	chr4	42164210	42164284	+	0	{'ENST00000645181.1': 'Intron'}	{'ENST00000645181.1': 'lncRNA'}	{'ENST00000645181.1': 74}	{'ENST00000645181.1': 'chr4'}	{'ENST00000645181.1': 42151563.0}	{'ENST00000645181.1': 42210373.0}	{'ENST00000645181.1': '+'}	ENST00000645181.1	Intron	lncRNA	74	chr4	42151563	42210373	+	['ENST00000645181.1']	[]	ENST00000645181.1	Intron	lncRNA	74	chr4	42151563	42210373	+	[]	[]	ENST00000645181.1	Intron	lncRNA	74	chr4	42151563	42210373	+	ENST00000645181.1	Intron	lncRNA	74	chr4	42151563	42210373	+
Merged-chr4-42758905-1	chr4	42758868	42758942	+	0	{'Intergenic': 'Unlabeled'}	{'Intergenic': 'Intergenic'}	{'Intergenic': 0}	{'Intergenic': nan}	{'Intergenic': nan}	{'Intergenic': nan}	{'Intergenic': '+'}	Intergenic	Unlabeled	Intergenic	0				+	['Intergenic']	[]	Intergenic	Unlabeled	Intergenic	0				+	[]	[]	Intergenic	Unlabeled	Intergenic	0				+	Intergenic	Unlabeled	Intergenic	0				+
Merged-chr4-61751748-1	chr4	61751711	61751785	+	0	{'ENST00000692606.1': 'Intron', 'ENST00000683033.1': 'Intron'}	{'ENST00000692606.1': 'lncRNA', 'ENST00000683033.1': 'protein_coding'}	{'ENST00000692606.1': 74, 'ENST00000683033.1': 74}	{'ENST00000692606.1': 'chr4', 'ENST00000683033.1': 'chr4'}	{'ENST00000692606.1': 61751028.0, 'ENST00000683033.1': 61733554.0}	{'ENST00000692606.1': 61752123.0, 'ENST00000683033.1': 61813808.0}	{'ENST00000692606.1': '-', 'ENST00000683033.1': '+'}	ENST00000692606.1	Intron	lncRNA	74	chr4	61751028	61752123	-	['ENST00000692606.1', 'ENST00000683033.1']	['ENST00000683033.1']	ENST00000683033.1	Intron	protein_coding	74	chr4	61733554	61813808	+	[]	[]	ENST00000683033.1	Intron	protein_coding	74	chr4	61733554	61813808	+	ENST00000683033.1	Intron	protein_coding	74	chr4	61733554	61813808	+
Merged-chr17-7588180-1	chr17	7588143	7588217	+	0	{'ENST00000250124.11': '3UTR', 'ENST00000538513.6': '3UTR', 'ENST00000423172.6': 'Intron'}	{'ENST00000250124.11': 'protein_coding', 'ENST00000538513.6': 'protein_coding', 'ENST00000423172.6': 'protein_coding'}	{'ENST00000250124.11': 69, 'ENST00000538513.6': 40, 'ENST00000423172.6': 74}	{'ENST00000250124.11': 'chr17', 'ENST00000538513.6': 'chr17', 'ENST00000423172.6': 'chr17'}	{'ENST00000250124.11': 7587549.0, 'ENST00000538513.6': 7588178.0, 'ENST00000423172.6': 7587271.0}	{'ENST00000250124.11': 7588212.0, 'ENST00000538513.6': 7588380.0, 'ENST00000423172.6': 7592443.0}	{'ENST00000250124.11': '+', 'ENST00000538513.6': '-', 'ENST00000423172.6': '+'}	ENST00000423172.6	Intron	protein_coding	74	chr17	7587271	7592443	+	['ENST00000250124.11', 'ENST00000538513.6', 'ENST00000423172.6']	['ENST00000250124.11']	ENST00000250124.11	3UTR	protein_coding	69	chr17	7587549	7588212	+	[]	['ENST00000250124.11', 'ENST00000538513.6']	ENST00000250124.11	3UTR	protein_coding	69	chr17	7587549	7588212	+	ENST00000250124.11	3UTR	protein_coding	69	chr17	7587549	7588212	+
Merged-chr17-8521188-1	chr17	8521151	8521225	-	0	{'ENST00000379980.8': 'exon'}	{'ENST00000379980.8': 'protein_coding'}	{'ENST00000379980.8': 74}	{'ENST00000379980.8': 'chr17'}	{'ENST00000379980.8': 8521092.0}	{'ENST00000379980.8': 8521285.0}	{'ENST00000379980.8': '-'}	ENST00000379980.8	exon	protein_coding	74	chr17	8521092	8521285	-	['ENST00000379980.8']	[]	ENST00000379980.8	exon	protein_coding	74	chr17	8521092	8521285	-	[]	[]	ENST00000379980.8	exon	protein_coding	74	chr17	8521092	8521285	-	ENST00000379980.8	exon	protein_coding	74	chr17	8521092	8521285	-
Merged-chr17-15990118-1	chr17	15990081	15990155	+	0	{'ENST00000399277.6': 'Intron'}	{'ENST00000399277.6': 'protein_coding'}	{'ENST00000399277.6': 74}	{'ENST00000399277.6': 'chr17'}	{'ENST00000399277.6': 15987368.0}	{'ENST00000399277.6': 15993756.0}	{'ENST00000399277.6': '-'}	ENST00000399277.6	Intron	protein_coding	74	chr17	15987368	15993756	-	['ENST00000399277.6']	['ENST00000399277.6']	ENST00000399277.6	Intron	protein_coding	74	chr17	15987368	15993756	-	[]	[]	ENST00000399277.6	Intron	protein_coding	74	chr17	15987368	15993756	-	ENST00000399277.6	Intron	protein_coding	74	chr17	15987368	15993756	-
Merged-chr4-87391128-1	chr4	87391091	87391165	-	0	{'ENST00000358290.9': '5UTR', 'ENST00000507286.1': '5UTR'}	{'ENST00000358290.9': 'protein_coding', 'ENST00000507286.1': 'protein_coding'}	{'ENST00000358290.9': 74, 'ENST00000507286.1': 58}	{'ENST00000358290.9': 'chr4', 'ENST00000507286.1': 'chr4'}	{'ENST00000358290.9': 87391071.0, 'ENST00000507286.1': 87391071.0}	{'ENST00000358290.9': 87391188.0, 'ENST00000507286.1': 87391149.0}	{'ENST00000358290.9': '-', 'ENST00000507286.1': '-'}	ENST00000358290.9	5UTR	protein_coding	74	chr4	87391071	87391188	-	['ENST00000358290.9', 'ENST00000507286.1']	['ENST00000358290.9']	ENST00000358290.9	5UTR	protein_coding	74	chr4	87391071	87391188	-	['ENST00000358290.9', 'ENST00000507286.1']	[]	ENST00000358290.9	5UTR	protein_coding	74	chr4	87391071	87391188	-	ENST00000358290.9	5UTR	protein_coding	74	chr4	87391071	87391188	-
Merged-chr4-94550880-1	chr4	94550843	94550917	+	0	{'ENST00000318007.9': 'Intron'}	{'ENST00000318007.9': 'protein_coding'}	{'ENST00000318007.9': 74}	{'ENST00000318007.9': 'chr4'}	{'ENST00000318007.9': 94523875.0}	{'ENST00000318007.9': 94573350.0}	{'ENST00000318007.9': '+'}	ENST00000318007.9	Intron	protein_coding	74	chr4	94523875	94573350	+	['ENST00000318007.9']	[]	ENST00000318007.9	Intron	protein_coding	74	chr4	94523875	94573350	+	[]	[]	ENST00000318007.9	Intron	protein_coding	74	chr4	94523875	94573350	+	ENST00000318007.9	Intron	protein_coding	74	chr4	94523875	94573350	+
Merged-chr4-105236094-1	chr4	105236057	105236131	+	0	{'ENST00000305737.6': 'CDS', 'ENST00000513237.5': 'exon', 'ENST00000540549.5': 'CDS'}	{'ENST00000305737.6': 'protein_coding', 'ENST00000513237.5': 'protein_coding', 'ENST00000540549.5': 'protein_coding'}	{'ENST00000305737.6': 74, 'ENST00000513237.5': 74, 'ENST00000540549.5': 74}	{'ENST00000305737.6': 'chr4', 'ENST00000513237.5': 'chr4', 'ENST00000540549.5': 'chr4'}	{'ENST00000305737.6': 105233943.0, 'ENST00000513237.5': 105233897.0, 'ENST00000540549.5': 105233943.0}	{'ENST00000305737.6': 105237437.0, 'ENST00000513237.5': 105237351.0, 'ENST00000540549.5': 105237351.0}	{'ENST00000305737.6': '+', 'ENST00000513237.5': '+', 'ENST00000540549.5': '+'}	ENST00000305737.6	CDS	protein_coding	74	chr4	105233943	105237437	+	['ENST00000305737.6', 'ENST00000513237.5', 'ENST00000540549.5']	[]	ENST00000305737.6	CDS	protein_coding	74	chr4	105233943	105237437	+	[]	[]	ENST00000305737.6	CDS	protein_coding	74	chr4	105233943	105237437	+	ENST00000305737.6	CDS	protein_coding	74	chr4	105233943	105237437	+
Merged-chr17-17795817-1	chr17	17795780	17795854	+	0	{'ENST00000353383.6': 'CDS'}	{'ENST00000353383.6': 'protein_coding'}	{'ENST00000353383.6': 74}	{'ENST00000353383.6': 'chr17'}	{'ENST00000353383.6': 17792949.0}	{'ENST00000353383.6': 17798513.0}	{'ENST00000353383.6': '+'}	ENST00000353383.6	CDS	protein_coding	74	chr17	17792949	17798513	+	['ENST00000353383.6']	['ENST00000353383.6']	ENST00000353383.6	CDS	protein_coding	74	chr17	17792949	17798513	+	[]	[]	ENST00000353383.6	CDS	protein_coding	74	chr17	17792949	17798513	+	ENST00000353383.6	CDS	protein_coding	74	chr17	17792949	17798513	+
Merged-chr17-28648588-1	chr17	28648551	28648625	-	0	{'ENST00000247020.9': '3UTR'}	{'ENST00000247020.9': 'protein_coding'}	{'ENST00000247020.9': 74}	{'ENST00000247020.9': 'chr17'}	{'ENST00000247020.9': 28648346.0}	{'ENST00000247020.9': 28648991.0}	{'ENST00000247020.9': '-'}	ENST00000247020.9	3UTR	protein_coding	74	chr17	28648346	28648991	-	['ENST00000247020.9']	['ENST00000247020.9']	ENST00000247020.9	3UTR	protein_coding	74	chr17	28648346	28648991	-	[]	['ENST00000247020.9']	ENST00000247020.9	3UTR	protein_coding	74	chr17	28648346	28648991	-	ENST00000247020.9	3UTR	protein_coding	74	chr17	28648346	28648991	-
Merged-chr17-32000540-1	chr17	32000503	32000577	+	0	{'ENST00000322652.10': '3UTR', 'ENST00000580398.1': '3UTR'}	{'ENST00000322652.10': 'protein_coding', 'ENST00000580398.1': 'protein_coding'}	{'ENST00000322652.10': 74, 'ENST00000580398.1': 74}	{'ENST00000322652.10': 'chr17', 'ENST00000580398.1': 'chr17'}	{'ENST00000322652.10': 31999001.0, 'ENST00000580398.1': 31999001.0}	{'ENST00000322652.10': 32001038.0, 'ENST00000580398.1': 32000649.0}	{'ENST00000322652.10': '+', 'ENST00000580398.1': '+'}	ENST00000322652.10	3UTR	protein_coding	74	chr17	31999001	32001038	+	['ENST00000322652.10', 'ENST00000580398.1']	['ENST00000322652.10']	ENST00000322652.10	3UTR	protein_coding	74	chr17	31999001	32001038	+	[]	['ENST00000322652.10', 'ENST00000580398.1']	ENST00000322652.10	3UTR	protein_coding	74	chr17	31999001	32001038	+	ENST00000322652.10	3UTR	protein_coding	74	chr17	31999001	32001038	+
Merged-chr17-36495817-1	chr17	36495780	36495854	+	0	{'ENST00000619730.4': '3UTR', 'ENST00000617429.5': '3UTR', 'ENST00000614623.5': '3UTR', 'ENST00000610930.4': '3UTR', 'ENST00000620324.4': 'Intron'}	{'ENST00000619730.4': 'protein_coding', 'ENST00000617429.5': 'protein_coding', 'ENST00000614623.5': 'protein_coding', 'ENST00000610930.4': 'protein_coding', 'ENST00000620324.4': 'protein_coding'}	{'ENST00000619730.4': 43, 'ENST00000617429.5': 42, 'ENST00000614623.5': 74, 'ENST00000610930.4': 74, 'ENST00000620324.4': 74}	{'ENST00000619730.4': 'chr17', 'ENST00000617429.5': 'chr17', 'ENST00000614623.5': 'chr17', 'ENST00000610930.4': 'chr17', 'ENST00000620324.4': 'chr17'}	{'ENST00000619730.4': 36495402.0, 'ENST00000617429.5': 36495402.0, 'ENST00000614623.5': 36495636.0, 'ENST00000610930.4': 36495755.0, 'ENST00000620324.4': 36494006.0}	{'ENST00000619730.4': 36495823.0, 'ENST00000617429.5': 36495822.0, 'ENST00000614623.5': 36496253.0, 'ENST00000610930.4': 36496253.0, 'ENST00000620324.4': 36497605.0}	{'ENST00000619730.4': '+', 'ENST00000617429.5': '+', 'ENST00000614623.5': '-', 'ENST00000610930.4': '-', 'ENST00000620324.4': '+'}	ENST00000610930.4	3UTR	protein_coding	74	chr17	36495755	36496253	-	['ENST00000619730.4', 'ENST00000617429.5', 'ENST00000614623.5', 'ENST00000610930.4', 'ENST00000620324.4']	['ENST00000617429.5', 'ENST00000614623.5']	ENST00000617429.5	3UTR	protein_coding	42	chr17	36495402	36495822	+	[]	['ENST00000619730.4', 'ENST00000617429.5', 'ENST00000614623.5', 'ENST00000610930.4']	ENST00000614623.5	3UTR	protein_coding	74	chr17	36495636	36496253	-	ENST00000617429.5	3UTR	protein_coding	42	chr17	36495402	36495822	+
Merged-chr17-36581450-1	chr17	36581413	36581487	+	0	{'ENST00000613102.5': 'exon'}	{'ENST00000613102.5': 'protein_coding'}	{'ENST00000613102.5': 74}	{'ENST00000613102.5': 'chr17'}	{'ENST00000613102.5': 36581344.0}	{'ENST00000613102.5': 36581538.0}	{'ENST00000613102.5': '+'}	ENST00000613102.5	exon	protein_coding	74	chr17	36581344	36581538	+	['ENST00000613102.5']	['ENST00000613102.5']	ENST00000613102.5	exon	protein_coding	74	chr17	36581344	36581538	+	[]	[]	ENST00000613102.5	exon	protein_coding	74	chr17	36581344	36581538	+	ENST00000613102.5	exon	protein_coding	74	chr17	36581344	36581538	+
Merged-chr4-127643699-1	chr4	127643662	127643736	+	0	{'ENST00000335251.11': 'exon'}	{'ENST00000335251.11': 'protein_coding'}	{'ENST00000335251.11': 74}	{'ENST00000335251.11': 'chr4'}	{'ENST00000335251.11': 127643521.0}	{'ENST00000335251.11': 127644056.0}	{'ENST00000335251.11': '+'}	ENST00000335251.11	exon	protein_coding	74	chr4	127643521	127644056	+	['ENST00000335251.11']	['ENST00000335251.11']	ENST00000335251.11	exon	protein_coding	74	chr4	127643521	127644056	+	[]	[]	ENST00000335251.11	exon	protein_coding	74	chr4	127643521	127644056	+	ENST00000335251.11	exon	protein_coding	74	chr4	127643521	127644056	+
Merged-chr4-127705759-1	chr4	127705722	127705796	+	0	{'ENST00000335251.11': 'exon'}	{'ENST00000335251.11': 'protein_coding'}	{'ENST00000335251.11': 74}	{'ENST00000335251.11': 'chr4'}	{'ENST00000335251.11': 127705591.0}	{'ENST00000335251.11': 127705812.0}	{'ENST00000335251.11': '+'}	ENST00000335251.11	exon	protein_coding	74	chr4	127705591	127705812	+	['ENST00000335251.11']	['ENST00000335251.11']	ENST00000335251.11	exon	protein_coding	74	chr4	127705591	127705812	+	[]	[]	ENST00000335251.11	exon	protein_coding	74	chr4	127705591	127705812	+	ENST00000335251.11	exon	protein_coding	74	chr4	127705591	127705812	+
Merged-chr4-128077862-1	chr4	128077825	128077899	+	0	{'ENST00000512292.5': 'exon'}	{'ENST00000512292.5': 'protein_coding'}	{'ENST00000512292.5': 74}	{'ENST00000512292.5': 'chr4'}	{'ENST00000512292.5': 128077788.0}	{'ENST00000512292.5': 128077962.0}	{'ENST00000512292.5': '+'}	ENST00000512292.5	exon	protein_coding	74	chr4	128077788	128077962	+	['ENST00000512292.5']	[]	ENST00000512292.5	exon	protein_coding	74	chr4	128077788	128077962	+	[]	[]	ENST00000512292.5	exon	protein_coding	74	chr4	128077788	128077962	+	ENST00000512292.5	exon	protein_coding	74	chr4	128077788	128077962	+
Merged-chr4-140379150-1	chr4	140379113	140379187	+	0	{'ENST00000394205.7': 'Intron', 'ENST00000506322.5': 'Intron', 'ENST00000512749.5': 'Intron', 'ENST00000506597.2': 'Intron', 'ENST00000510586.5': 'Intron'}	{'ENST00000394205.7': 'protein_coding', 'ENST00000506322.5': 'protein_coding', 'ENST00000512749.5': 'protein_coding', 'ENST00000506597.2': 'protein_coding', 'ENST00000510586.5': 'protein_coding'}	{'ENST00000394205.7': 7, 'ENST00000506322.5': 7, 'ENST00000512749.5': 7, 'ENST00000506597.2': 7, 'ENST00000510586.5': 7}	{'ENST00000394205.7': 'chr4', 'ENST00000506322.5': 'chr4', 'ENST00000512749.5': 'chr4', 'ENST00000506597.2': 'chr4', 'ENST00000510586.5': 'chr4'}	{'ENST00000394205.7': 140343708.0, 'ENST00000506322.5': 140376778.0, 'ENST00000512749.5': 140373544.0, 'ENST00000506597.2': 140373717.0, 'ENST00000510586.5': 140374316.0}	{'ENST00000394205.7': 140379120.0, 'ENST00000506322.5': 140379120.0, 'ENST00000512749.5': 140379120.0, 'ENST00000506597.2': 140379120.0, 'ENST00000510586.5': 140379120.0}	{'ENST00000394205.7': '+', 'ENST00000506322.5': '+', 'ENST00000512749.5': '+', 'ENST00000506597.2': '+', 'ENST00000510586.5': '+'}	ENST00000506322.5	Intron	protein_coding	7	chr4	140376778	140379120	+	['ENST00000394205.7', 'ENST00000506322.5', 'ENST00000512749.5', 'ENST00000506597.2', 'ENST00000510586.5']	[]	ENST00000506322.5	Intron	protein_coding	7	chr4	140376778	140379120	+	[]	[]	ENST00000506322.5	Intron	protein_coding	7	chr4	140376778	140379120	+	ENST00000506322.5	Intron	protein_coding	7	chr4	140376778	140379120	+
Merged-chr19-55646307-1	chr19	55646270	55646344	-	0	{'ENST00000587252.5': 'TTS', 'ENST00000270451.6': 'TTS', 'ENST00000588537.1': 'TTS'}	{'ENST00000587252.5': 'protein_coding', 'ENST00000270451.6': 'protein_coding', 'ENST00000588537.1': 'protein_coding'}	{'ENST00000587252.5': 74, 'ENST00000270451.6': 74, 'ENST00000588537.1': 74}	{'ENST00000587252.5': 'chr19', 'ENST00000270451.6': 'chr19', 'ENST00000588537.1': 'chr19'}	{'ENST00000587252.5': 55645063.0, 'ENST00000270451.6': 55645063.0, 'ENST00000588537.1': 55645063.0}	{'ENST00000587252.5': 55646622.0, 'ENST00000270451.6': 55646623.0, 'ENST00000588537.1': 55646621.0}	{'ENST00000587252.5': '+', 'ENST00000270451.6': '+', 'ENST00000588537.1': '+'}	ENST00000587252.5	TTS	protein_coding	74	chr19	55645063	55646622	+	['ENST00000587252.5', 'ENST00000270451.6', 'ENST00000588537.1']	['ENST00000270451.6']	ENST00000270451.6	TTS	protein_coding	74	chr19	55645063	55646623	+	[]	[]	ENST00000270451.6	TTS	protein_coding	74	chr19	55645063	55646623	+	ENST00000270451.6	TTS	protein_coding	74	chr19	55645063	55646623	+
Merged-chr19-1244430-1	chr19	1244393	1244467	+	0	{'ENST00000215375.7': '3UTR', 'ENST00000395633.5': 'Intron', 'ENST00000591660.5': 'Intron'}	{'ENST00000215375.7': 'protein_coding', 'ENST00000395633.5': 'protein_coding', 'ENST00000591660.5': 'protein_coding'}	{'ENST00000215375.7': 33, 'ENST00000395633.5': 28, 'ENST00000591660.5': 28}	{'ENST00000215375.7': 'chr19', 'ENST00000395633.5': 'chr19', 'ENST00000591660.5': 'chr19'}	{'ENST00000215375.7': 1244435.0, 'ENST00000395633.5': 1244440.0, 'ENST00000591660.5': 1244440.0}	{'ENST00000215375.7': 1244825.0, 'ENST00000395633.5': 1244736.0, 'ENST00000591660.5': 1244690.0}	{'ENST00000215375.7': '+', 'ENST00000395633.5': '+', 'ENST00000591660.5': '+'}	ENST00000215375.7	3UTR	protein_coding	33	chr19	1244435	1244825	+	['ENST00000215375.7', 'ENST00000395633.5', 'ENST00000591660.5']	['ENST00000215375.7']	ENST00000215375.7	3UTR	protein_coding	33	chr19	1244435	1244825	+	[]	['ENST00000215375.7']	ENST00000215375.7	3UTR	protein_coding	33	chr19	1244435	1244825	+	ENST00000215375.7	3UTR	protein_coding	33	chr19	1244435	1244825	+
Merged-chr19-1440432-1	chr19	1440395	1440469	+	0	{'ENST00000233609.8': '3UTR', 'ENST00000592588.7': '3UTR', 'ENST00000591032.1': '3UTR', 'ENST00000589656.6': '3UTR', 'ENST00000586096.3': '3UTR'}	{'ENST00000233609.8': 'protein_coding', 'ENST00000592588.7': 'protein_coding', 'ENST00000591032.1': 'protein_coding', 'ENST00000589656.6': 'protein_coding', 'ENST00000586096.3': 'protein_coding'}	{'ENST00000233609.8': 10, 'ENST00000592588.7': 10, 'ENST00000591032.1': 10, 'ENST00000589656.6': 10, 'ENST00000586096.3': 74}	{'ENST00000233609.8': 'chr19', 'ENST00000592588.7': 'chr19', 'ENST00000591032.1': 'chr19', 'ENST00000589656.6': 'chr19', 'ENST00000586096.3': 'chr19'}	{'ENST00000233609.8': 1440460.0, 'ENST00000592588.7': 1440460.0, 'ENST00000591032.1': 1440460.0, 'ENST00000589656.6': 1440460.0, 'ENST00000586096.3': 1440317.0}	{'ENST00000233609.8': 1440494.0, 'ENST00000592588.7': 1440495.0, 'ENST00000591032.1': 1440490.0, 'ENST00000589656.6': 1440488.0, 'ENST00000586096.3': 1440494.0}	{'ENST00000233609.8': '+', 'ENST00000592588.7': '+', 'ENST00000591032.1': '+', 'ENST00000589656.6': '+', 'ENST00000586096.3': '+'}	ENST00000586096.3	3UTR	protein_coding	74	chr19	1440317	1440494	+	['ENST00000233609.8', 'ENST00000592588.7', 'ENST00000591032.1', 'ENST00000589656.6', 'ENST00000586096.3']	['ENST00000592588.7']	ENST00000592588.7	3UTR	protein_coding	10	chr19	1440460	1440495	+	[]	['ENST00000233609.8', 'ENST00000592588.7', 'ENST00000591032.1', 'ENST00000589656.6', 'ENST00000586096.3']	ENST00000586096.3	3UTR	protein_coding	74	chr19	1440317	1440494	+	ENST00000592588.7	3UTR	protein_coding	10	chr19	1440460	1440495	+
Merged-chr6-163571649-1	chr6	163571612	163571686	+	0	{'ENST00000361752.8': '3UTR'}	{'ENST00000361752.8': 'protein_coding'}	{'ENST00000361752.8': 74}	{'ENST00000361752.8': 'chr6'}	{'ENST00000361752.8': 163570708.0}	{'ENST00000361752.8': 163578592.0}	{'ENST00000361752.8': '+'}	ENST00000361752.8	3UTR	protein_coding	74	chr6	163570708	163578592	+	['ENST00000361752.8']	['ENST00000361752.8']	ENST00000361752.8	3UTR	protein_coding	74	chr6	163570708	163578592	+	[]	['ENST00000361752.8']	ENST00000361752.8	3UTR	protein_coding	74	chr6	163570708	163578592	+	ENST00000361752.8	3UTR	protein_coding	74	chr6	163570708	163578592	+
Merged-chr19-14091698-1	chr19	14091661	14091735	-	0	{'ENST00000677951.1': '3UTR', 'ENST00000350356.7': '3UTR'}	{'ENST00000677951.1': 'protein_coding', 'ENST00000350356.7': 'protein_coding'}	{'ENST00000677951.1': 48, 'ENST00000350356.7': 39}	{'ENST00000677951.1': 'chr19', 'ENST00000350356.7': 'chr19'}	{'ENST00000677951.1': 14091688.0, 'ENST00000350356.7': 14091697.0}	{'ENST00000677951.1': 14093114.0, 'ENST00000350356.7': 14093114.0}	{'ENST00000677951.1': '-', 'ENST00000350356.7': '-'}	ENST00000677951.1	3UTR	protein_coding	48	chr19	14091688	14093114	-	['ENST00000677951.1', 'ENST00000350356.7']	[]	ENST00000677951.1	3UTR	protein_coding	48	chr19	14091688	14093114	-	[]	['ENST00000677951.1', 'ENST00000350356.7']	ENST00000677951.1	3UTR	protein_coding	48	chr19	14091688	14093114	-	ENST00000677951.1	3UTR	protein_coding	48	chr19	14091688	14093114	-
Merged-chr6-32148415-1	chr6	32148378	32148452	-	0	{'ENST00000375150.6': '3UTR', 'ENST00000211413.10': '3UTR'}	{'ENST00000375150.6': 'protein_coding', 'ENST00000211413.10': 'protein_coding'}	{'ENST00000375150.6': 74, 'ENST00000211413.10': 74}	{'ENST00000375150.6': 'chr6', 'ENST00000211413.10': 'chr6'}	{'ENST00000375150.6': 32148359.0, 'ENST00000211413.10': 32148363.0}	{'ENST00000375150.6': 32148715.0, 'ENST00000211413.10': 32149224.0}	{'ENST00000375150.6': '-', 'ENST00000211413.10': '-'}	ENST00000211413.10	3UTR	protein_coding	74	chr6	32148363	32149224	-	['ENST00000375150.6', 'ENST00000211413.10']	['ENST00000211413.10']	ENST00000211413.10	3UTR	protein_coding	74	chr6	32148363	32149224	-	[]	['ENST00000375150.6', 'ENST00000211413.10']	ENST00000375150.6	3UTR	protein_coding	74	chr6	32148359	32148715	-	ENST00000211413.10	3UTR	protein_coding	74	chr6	32148363	32149224	-
Merged-chr6-34762654-1	chr6	34762617	34762691	+	0	{'ENST00000244520.10': 'exon', 'ENST00000374018.5': 'AltUTR'}	{'ENST00000244520.10': 'protein_coding', 'ENST00000374018.5': 'protein_coding'}	{'ENST00000244520.10': 74, 'ENST00000374018.5': 49}	{'ENST00000244520.10': 'chr6', 'ENST00000374018.5': 'chr6'}	{'ENST00000244520.10': 34762595.0, 'ENST00000374018.5': 34762595.0}	{'ENST00000244520.10': 34762703.0, 'ENST00000374018.5': 34762666.0}	{'ENST00000244520.10': '+', 'ENST00000374018.5': '+'}	ENST00000244520.10	exon	protein_coding	74	chr6	34762595	34762703	+	['ENST00000244520.10', 'ENST00000374018.5']	['ENST00000244520.10']	ENST00000244520.10	exon	protein_coding	74	chr6	34762595	34762703	+	[]	[]	ENST00000244520.10	exon	protein_coding	74	chr6	34762595	34762703	+	ENST00000244520.10	exon	protein_coding	74	chr6	34762595	34762703	+
Merged-chr19-14092101-1	chr19	14092064	14092138	-	0	{'ENST00000677951.1': '3UTR', 'ENST00000350356.7': '3UTR', 'ENST00000590853.5': '3UTR'}	{'ENST00000677951.1': 'protein_coding', 'ENST00000350356.7': 'protein_coding', 'ENST00000590853.5': 'protein_coding'}	{'ENST00000677951.1': 74, 'ENST00000350356.7': 74, 'ENST00000590853.5': 74}	{'ENST00000677951.1': 'chr19', 'ENST00000350356.7': 'chr19', 'ENST00000590853.5': 'chr19'}	{'ENST00000677951.1': 14091688.0, 'ENST00000350356.7': 14091697.0, 'ENST00000590853.5': 14092036.0}	{'ENST00000677951.1': 14093114.0, 'ENST00000350356.7': 14093114.0, 'ENST00000590853.5': 14092579.0}	{'ENST00000677951.1': '-', 'ENST00000350356.7': '-', 'ENST00000590853.5': '-'}	ENST00000590853.5	3UTR	protein_coding	74	chr19	14092036	14092579	-	['ENST00000677951.1', 'ENST00000350356.7', 'ENST00000590853.5']	[]	ENST00000590853.5	3UTR	protein_coding	74	chr19	14092036	14092579	-	[]	['ENST00000677951.1', 'ENST00000350356.7', 'ENST00000590853.5']	ENST00000677951.1	3UTR	protein_coding	74	chr19	14091688	14093114	-	ENST00000590853.5	3UTR	protein_coding	74	chr19	14092036	14092579	-
Merged-chr19-16552450-1	chr19	16552413	16552487	-	0	{'ENST00000595753.6': '3UTR', 'ENST00000409035.1': 'Intron'}	{'ENST00000595753.6': 'protein_coding', 'ENST00000409035.1': 'protein_coding'}	{'ENST00000595753.6': 74, 'ENST00000409035.1': 74}	{'ENST00000595753.6': 'chr19', 'ENST00000409035.1': 'chr19'}	{'ENST00000595753.6': 16549837.0, 'ENST00000409035.1': 16519352.0}	{'ENST00000595753.6': 16553681.0, 'ENST00000409035.1': 16553769.0}	{'ENST00000595753.6': '-', 'ENST00000409035.1': '-'}	ENST00000595753.6	3UTR	protein_coding	74	chr19	16549837	16553681	-	['ENST00000595753.6', 'ENST00000409035.1']	['ENST00000595753.6']	ENST00000595753.6	3UTR	protein_coding	74	chr19	16549837	16553681	-	[]	['ENST00000595753.6']	ENST00000595753.6	3UTR	protein_coding	74	chr19	16549837	16553681	-	ENST00000595753.6	3UTR	protein_coding	74	chr19	16549837	16553681	-
Merged-chr19-36009138-1	chr19	36009101	36009175	-	0	{'ENST00000378875.8': '3UTR', 'ENST00000486389.5': 'exon', 'ENST00000485128.5': 'exon', 'ENST00000473572.2': 'Intron'}	{'ENST00000378875.8': 'protein_coding', 'ENST00000486389.5': 'protein_coding', 'ENST00000485128.5': 'protein_coding', 'ENST00000473572.2': 'lncRNA'}	{'ENST00000378875.8': 56, 'ENST00000486389.5': 52, 'ENST00000485128.5': 1, 'ENST00000473572.2': 74}	{'ENST00000378875.8': 'chr19', 'ENST00000486389.5': 'chr19', 'ENST00000485128.5': 'chr19', 'ENST00000473572.2': 'chr19'}	{'ENST00000378875.8': 36009120.0, 'ENST00000486389.5': 36009124.0, 'ENST00000485128.5': 36009175.0, 'ENST00000473572.2': 36008691.0}	{'ENST00000378875.8': 36009292.0, 'ENST00000486389.5': 36009553.0, 'ENST00000485128.5': 36009553.0, 'ENST00000473572.2': 36009258.0}	{'ENST00000378875.8': '-', 'ENST00000486389.5': '-', 'ENST00000485128.5': '-', 'ENST00000473572.2': '-'}	ENST00000473572.2	Intron	lncRNA	74	chr19	36008691	36009258	-	['ENST00000378875.8', 'ENST00000486389.5', 'ENST00000485128.5', 'ENST00000473572.2']	['ENST00000378875.8']	ENST00000378875.8	3UTR	protein_coding	56	chr19	36009120	36009292	-	[]	['ENST00000378875.8']	ENST00000378875.8	3UTR	protein_coding	56	chr19	36009120	36009292	-	ENST00000378875.8	3UTR	protein_coding	56	chr19	36009120	36009292	-
Merged-chr6-87511515-1	chr6	87511478	87511552	+	0	{'ENST00000369556.7': '3UTR', 'ENST00000369552.9': '3UTR'}	{'ENST00000369556.7': 'protein_coding', 'ENST00000369552.9': 'protein_coding'}	{'ENST00000369556.7': 29, 'ENST00000369552.9': 29}	{'ENST00000369556.7': 'chr6', 'ENST00000369552.9': 'chr6'}	{'ENST00000369556.7': 87511524.0, 'ENST00000369552.9': 87511524.0}	{'ENST00000369556.7': 87512330.0, 'ENST00000369552.9': 87512336.0}	{'ENST00000369556.7': '+', 'ENST00000369552.9': '+'}	ENST00000369556.7	3UTR	protein_coding	29	chr6	87511524	87512330	+	['ENST00000369556.7', 'ENST00000369552.9']	['ENST00000369552.9']	ENST00000369552.9	3UTR	protein_coding	29	chr6	87511524	87512336	+	[]	['ENST00000369556.7', 'ENST00000369552.9']	ENST00000369556.7	3UTR	protein_coding	29	chr6	87511524	87512330	+	ENST00000369552.9	3UTR	protein_coding	29	chr6	87511524	87512336	+
Merged-chr6-153282265-1	chr6	153282228	153282302	-	0	{'ENST00000492974.2': 'exon', 'ENST00000392385.2': 'Intron'}	{'ENST00000492974.2': 'processed_pseudogene', 'ENST00000392385.2': 'lncRNA'}	{'ENST00000492974.2': 16, 'ENST00000392385.2': 74}	{'ENST00000492974.2': 'chr6', 'ENST00000392385.2': 'chr6'}	{'ENST00000492974.2': 153282287.0, 'ENST00000392385.2': 153268284.0}	{'ENST00000492974.2': 153282733.0, 'ENST00000392385.2': 153346445.0}	{'ENST00000492974.2': '-', 'ENST00000392385.2': '+'}	ENST00000392385.2	Intron	lncRNA	74	chr6	153268284	153346445	+	['ENST00000492974.2', 'ENST00000392385.2']	[]	ENST00000392385.2	Intron	lncRNA	74	chr6	153268284	153346445	+	[]	[]	ENST00000392385.2	Intron	lncRNA	74	chr6	153268284	153346445	+	ENST00000392385.2	Intron	lncRNA	74	chr6	153268284	153346445	+
Merged-chr19-41956695-1	chr19	41956658	41956732	-	0	{'ENST00000601891.5': '3UTR', 'ENST00000222008.11': '3UTR'}	{'ENST00000601891.5': 'protein_coding', 'ENST00000222008.11': 'protein_coding'}	{'ENST00000601891.5': 52, 'ENST00000222008.11': 50}	{'ENST00000601891.5': 'chr19', 'ENST00000222008.11': 'chr19'}	{'ENST00000601891.5': 41956681.0, 'ENST00000222008.11': 41956683.0}	{'ENST00000601891.5': 41956848.0, 'ENST00000222008.11': 41956848.0}	{'ENST00000601891.5': '-', 'ENST00000222008.11': '-'}	ENST00000601891.5	3UTR	protein_coding	52	chr19	41956681	41956848	-	['ENST00000601891.5', 'ENST00000222008.11']	['ENST00000222008.11']	ENST00000222008.11	3UTR	protein_coding	50	chr19	41956683	41956848	-	[]	['ENST00000601891.5', 'ENST00000222008.11']	ENST00000601891.5	3UTR	protein_coding	52	chr19	41956681	41956848	-	ENST00000222008.11	3UTR	protein_coding	50	chr19	41956683	41956848	-
Merged-chr19-45409617-1	chr19	45409580	45409654	-	0	{'ENST00000309424.8': '3UTR', 'ENST00000589804.1': '3UTR', 'ENST00000300853.8': '3UTR', 'ENST00000340192.11': '3UTR', 'ENST00000591636.5': '3UTR'}	{'ENST00000309424.8': 'protein_coding', 'ENST00000589804.1': 'protein_coding', 'ENST00000300853.8': 'protein_coding', 'ENST00000340192.11': 'protein_coding', 'ENST00000591636.5': 'protein_coding'}	{'ENST00000309424.8': 74, 'ENST00000589804.1': 74, 'ENST00000300853.8': 74, 'ENST00000340192.11': 41, 'ENST00000591636.5': 36}	{'ENST00000309424.8': 'chr19', 'ENST00000589804.1': 'chr19', 'ENST00000300853.8': 'chr19', 'ENST00000340192.11': 'chr19', 'ENST00000591636.5': 'chr19'}	{'ENST00000309424.8': 45409499.0, 'ENST00000589804.1': 45409499.0, 'ENST00000300853.8': 45407334.0, 'ENST00000340192.11': 45409614.0, 'ENST00000591636.5': 45409619.0}	{'ENST00000309424.8': 45410737.0, 'ENST00000589804.1': 45409786.0, 'ENST00000300853.8': 45409677.0, 'ENST00000340192.11': 45409677.0, 'ENST00000591636.5': 45409688.0}	{'ENST00000309424.8': '+', 'ENST00000589804.1': '+', 'ENST00000300853.8': '-', 'ENST00000340192.11': '-', 'ENST00000591636.5': '-'}	ENST00000309424.8	3UTR	protein_coding	74	chr19	45409499	45410737	+	['ENST00000309424.8', 'ENST00000589804.1', 'ENST00000300853.8', 'ENST00000340192.11', 'ENST00000591636.5']	['ENST00000309424.8', 'ENST00000300853.8']	ENST00000309424.8	3UTR	protein_coding	74	chr19	45409499	45410737	+	[]	['ENST00000309424.8', 'ENST00000589804.1', 'ENST00000300853.8', 'ENST00000340192.11', 'ENST00000591636.5']	ENST00000309424.8	3UTR	protein_coding	74	chr19	45409499	45410737	+	ENST00000309424.8	3UTR	protein_coding	74	chr19	45409499	45410737	+
Merged-chr19-47537784-1	chr19	47537747	47537821	+	0	{'ENST00000391901.8': 'Intron'}	{'ENST00000391901.8': 'protein_coding'}	{'ENST00000391901.8': 74}	{'ENST00000391901.8': 'chr19'}	{'ENST00000391901.8': 47532972.0}	{'ENST00000391901.8': 47538141.0}	{'ENST00000391901.8': '-'}	ENST00000391901.8	Intron	protein_coding	74	chr19	47532972	47538141	-	['ENST00000391901.8']	['ENST00000391901.8']	ENST00000391901.8	Intron	protein_coding	74	chr19	47532972	47538141	-	[]	[]	ENST00000391901.8	Intron	protein_coding	74	chr19	47532972	47538141	-	ENST00000391901.8	Intron	protein_coding	74	chr19	47532972	47538141	-
Merged-chr19-49591530-1	chr19	49591493	49591567	+	0	{'ENST00000418929.7': '5UTR'}	{'ENST00000418929.7': 'protein_coding'}	{'ENST00000418929.7': 74}	{'ENST00000418929.7': 'chr19'}	{'ENST00000418929.7': 49591182.0}	{'ENST00000418929.7': 49591654.0}	{'ENST00000418929.7': '+'}	ENST00000418929.7	5UTR	protein_coding	74	chr19	49591182	49591654	+	['ENST00000418929.7']	['ENST00000418929.7']	ENST00000418929.7	5UTR	protein_coding	74	chr19	49591182	49591654	+	['ENST00000418929.7']	[]	ENST00000418929.7	5UTR	protein_coding	74	chr19	49591182	49591654	+	ENST00000418929.7	5UTR	protein_coding	74	chr19	49591182	49591654	+
Merged-chr6-30292364-1	chr6	30292327	30292401	-	0	{'ENST00000659132.1': 'exon', 'ENST00000653541.1': 'exon', 'ENST00000654915.1': 'exon', 'ENST00000602698.7': 'exon', 'ENST00000657247.1': 'exon', 'ENST00000654996.1': 'Intron', 'ENST00000687430.1': 'Intron', 'ENST00000453558.1': 'Intron', 'ENST00000482052.6': 'Intron'}	{'ENST00000659132.1': 'lncRNA', 'ENST00000653541.1': 'lncRNA', 'ENST00000654915.1': 'lncRNA', 'ENST00000602698.7': 'lncRNA', 'ENST00000657247.1': 'lncRNA', 'ENST00000654996.1': 'lncRNA', 'ENST00000687430.1': 'lncRNA', 'ENST00000453558.1': 'lncRNA', 'ENST00000482052.6': 'lncRNA'}	{'ENST00000659132.1': 74, 'ENST00000653541.1': 74, 'ENST00000654915.1': 74, 'ENST00000602698.7': 74, 'ENST00000657247.1': 74, 'ENST00000654996.1': 74, 'ENST00000687430.1': 74, 'ENST00000453558.1': 74, 'ENST00000482052.6': 74}	{'ENST00000659132.1': 'chr6', 'ENST00000653541.1': 'chr6', 'ENST00000654915.1': 'chr6', 'ENST00000602698.7': 'chr6', 'ENST00000657247.1': 'chr6', 'ENST00000654996.1': 'chr6', 'ENST00000687430.1': 'chr6', 'ENST00000453558.1': 'chr6', 'ENST00000482052.6': 'chr6'}	{'ENST00000659132.1': 30286703.0, 'ENST00000653541.1': 30286728.0, 'ENST00000654915.1': 30286806.0, 'ENST00000602698.7': 30291006.0, 'ENST00000657247.1': 30291537.0, 'ENST00000654996.1': 30291982.0, 'ENST00000687430.1': 30291982.0, 'ENST00000453558.1': 30254464.0, 'ENST00000482052.6': 30262342.0}	{'ENST00000659132.1': 30292599.0, 'ENST00000653541.1': 30292599.0, 'ENST00000654915.1': 30292599.0, 'ENST00000602698.7': 30292599.0, 'ENST00000657247.1': 30294964.0, 'ENST00000654996.1': 30294470.0, 'ENST00000687430.1': 30296131.0, 'ENST00000453558.1': 30326008.0, 'ENST00000482052.6': 30292402.0}	{'ENST00000659132.1': '-', 'ENST00000653541.1': '-', 'ENST00000654915.1': '-', 'ENST00000602698.7': '-', 'ENST00000657247.1': '-', 'ENST00000654996.1': '-', 'ENST00000687430.1': '-', 'ENST00000453558.1': '-', 'ENST00000482052.6': '+'}	ENST00000654996.1	Intron	lncRNA	74	chr6	30291982	30294470	-	['ENST00000659132.1', 'ENST00000653541.1', 'ENST00000654915.1', 'ENST00000602698.7', 'ENST00000657247.1', 'ENST00000654996.1', 'ENST00000687430.1', 'ENST00000453558.1', 'ENST00000482052.6']	[]	ENST00000654996.1	Intron	lncRNA	74	chr6	30291982	30294470	-	[]	[]	ENST00000654996.1	Intron	lncRNA	74	chr6	30291982	30294470	-	ENST00000654996.1	Intron	lncRNA	74	chr6	30291982	30294470	-
Merged-chr6-63583363-1	chr6	63583326	63583400	+	0	{'ENST00000648894.1': '3UTR', 'ENST00000673199.1': '3UTR', 'ENST00000626021.3': '3UTR', 'ENST00000370651.7': 'exon'}	{'ENST00000648894.1': 'protein_coding', 'ENST00000673199.1': 'protein_coding', 'ENST00000626021.3': 'protein_coding', 'ENST00000370651.7': 'protein_coding'}	{'ENST00000648894.1': 51, 'ENST00000673199.1': 74, 'ENST00000626021.3': 74, 'ENST00000370651.7': 74}	{'ENST00000648894.1': 'chr6', 'ENST00000673199.1': 'chr6', 'ENST00000626021.3': 'chr6', 'ENST00000370651.7': 'chr6'}	{'ENST00000648894.1': 63580172.0, 'ENST00000673199.1': 63580172.0, 'ENST00000626021.3': 63580172.0, 'ENST00000370651.7': 63580057.0}	{'ENST00000648894.1': 63583377.0, 'ENST00000673199.1': 63583436.0, 'ENST00000626021.3': 63583588.0, 'ENST00000370651.7': 63583587.0}	{'ENST00000648894.1': '+', 'ENST00000673199.1': '+', 'ENST00000626021.3': '+', 'ENST00000370651.7': '+'}	ENST00000673199.1	3UTR	protein_coding	74	chr6	63580172	63583436	+	['ENST00000648894.1', 'ENST00000673199.1', 'ENST00000626021.3', 'ENST00000370651.7']	['ENST00000626021.3']	ENST00000626021.3	3UTR	protein_coding	74	chr6	63580172	63583588	+	[]	['ENST00000648894.1', 'ENST00000673199.1', 'ENST00000626021.3']	ENST00000673199.1	3UTR	protein_coding	74	chr6	63580172	63583436	+	ENST00000626021.3	3UTR	protein_coding	74	chr6	63580172	63583588	+
Merged-chr6-79234544-1	chr6	79234507	79234581	-	0	{'ENST00000344726.10': '5UTR', 'ENST00000275036.11': '5UTR', 'ENST00000706659.1': '5UTR', 'ENST00000706660.1': '5UTR', 'ENST00000604516.2': 'exon', 'ENST00000703810.2': 'Intron'}	{'ENST00000344726.10': 'protein_coding', 'ENST00000275036.11': 'protein_coding', 'ENST00000706659.1': 'protein_coding', 'ENST00000706660.1': 'protein_coding', 'ENST00000604516.2': 'lncRNA', 'ENST00000703810.2': 'protein_coding'}	{'ENST00000344726.10': 21, 'ENST00000275036.11': 21, 'ENST00000706659.1': 21, 'ENST00000706660.1': 21, 'ENST00000604516.2': 74, 'ENST00000703810.2': 38}	{'ENST00000344726.10': 'chr6', 'ENST00000275036.11': 'chr6', 'ENST00000706659.1': 'chr6', 'ENST00000706660.1': 'chr6', 'ENST00000604516.2': 'chr6', 'ENST00000703810.2': 'chr6'}	{'ENST00000344726.10': 79234561.0, 'ENST00000275036.11': 79234561.0, 'ENST00000706659.1': 79234561.0, 'ENST00000706660.1': 79234561.0, 'ENST00000604516.2': 79234062.0, 'ENST00000703810.2': 79215022.0}	{'ENST00000344726.10': 79234682.0, 'ENST00000275036.11': 79234689.0, 'ENST00000706659.1': 79234656.0, 'ENST00000706660.1': 79234675.0, 'ENST00000604516.2': 79236797.0, 'ENST00000703810.2': 79234545.0}	{'ENST00000344726.10': '-', 'ENST00000275036.11': '-', 'ENST00000706659.1': '-', 'ENST00000706660.1': '-', 'ENST00000604516.2': '+', 'ENST00000703810.2': '-'}	ENST00000604516.2	exon	lncRNA	74	chr6	79234062	79236797	+	['ENST00000344726.10', 'ENST00000275036.11', 'ENST00000706659.1', 'ENST00000706660.1', 'ENST00000604516.2', 'ENST00000703810.2']	[]	ENST00000604516.2	exon	lncRNA	74	chr6	79234062	79236797	+	['ENST00000344726.10', 'ENST00000275036.11', 'ENST00000706659.1', 'ENST00000706660.1']	[]	ENST00000604516.2	exon	lncRNA	74	chr6	79234062	79236797	+	ENST00000344726.10	5UTR	protein_coding	21	chr6	79234561	79234682	-
Merged-chr19-5623303-1	chr19	5623266	5623340	+	0	{'ENST00000588852.2': 'CDS', 'ENST00000292123.9': 'exon', 'ENST00000592224.5': 'exon', 'ENST00000454510.5': 'exon'}	{'ENST00000588852.2': 'protein_coding', 'ENST00000292123.9': 'protein_coding', 'ENST00000592224.5': 'protein_coding', 'ENST00000454510.5': 'protein_coding'}	{'ENST00000588852.2': 74, 'ENST00000292123.9': 74, 'ENST00000592224.5': 74, 'ENST00000454510.5': 74}	{'ENST00000588852.2': 'chr19', 'ENST00000292123.9': 'chr19', 'ENST00000592224.5': 'chr19', 'ENST00000454510.5': 'chr19'}	{'ENST00000588852.2': 5623206.0, 'ENST00000292123.9': 5623099.0, 'ENST00000592224.5': 5623118.0, 'ENST00000454510.5': 5623139.0}	{'ENST00000588852.2': 5623394.0, 'ENST00000292123.9': 5623394.0, 'ENST00000592224.5': 5623394.0, 'ENST00000454510.5': 5623394.0}	{'ENST00000588852.2': '+', 'ENST00000292123.9': '+', 'ENST00000592224.5': '+', 'ENST00000454510.5': '+'}	ENST00000588852.2	CDS	protein_coding	74	chr19	5623206	5623394	+	['ENST00000588852.2', 'ENST00000292123.9', 'ENST00000592224.5', 'ENST00000454510.5']	['ENST00000588852.2']	ENST00000588852.2	CDS	protein_coding	74	chr19	5623206	5623394	+	[]	[]	ENST00000588852.2	CDS	protein_coding	74	chr19	5623206	5623394	+	ENST00000588852.2	CDS	protein_coding	74	chr19	5623206	5623394	+
Merged-chr19-6210400-1	chr19	6210363	6210437	-	0	{'ENST00000252674.9': '3UTR'}	{'ENST00000252674.9': 'protein_coding'}	{'ENST00000252674.9': 57}	{'ENST00000252674.9': 'chr19'}	{'ENST00000252674.9': 6210381.0}	{'ENST00000252674.9': 6213044.0}	{'ENST00000252674.9': '-'}	ENST00000252674.9	3UTR	protein_coding	57	chr19	6210381	6213044	-	['ENST00000252674.9']	['ENST00000252674.9']	ENST00000252674.9	3UTR	protein_coding	57	chr19	6210381	6213044	-	[]	['ENST00000252674.9']	ENST00000252674.9	3UTR	protein_coding	57	chr19	6210381	6213044	-	ENST00000252674.9	3UTR	protein_coding	57	chr19	6210381	6213044	-
Merged-chr19-7814583-1	chr19	7814546	7814620	-	0	{'ENST00000702925.1': 'Intron'}	{'ENST00000702925.1': 'lncRNA'}	{'ENST00000702925.1': 74}	{'ENST00000702925.1': 'chr19'}	{'ENST00000702925.1': 7796688.0}	{'ENST00000702925.1': 7819382.0}	{'ENST00000702925.1': '+'}	ENST00000702925.1	Intron	lncRNA	74	chr19	7796688	7819382	+	['ENST00000702925.1']	[]	ENST00000702925.1	Intron	lncRNA	74	chr19	7796688	7819382	+	[]	[]	ENST00000702925.1	Intron	lncRNA	74	chr19	7796688	7819382	+	ENST00000702925.1	Intron	lncRNA	74	chr19	7796688	7819382	+
Merged-chr6-99402545-1	chr6	99402508	99402582	-	0	{'ENST00000681615.1': 'Intron', 'ENST00000681611.1': 'Intron'}	{'ENST00000681615.1': 'protein_coding', 'ENST00000681611.1': 'protein_coding'}	{'ENST00000681615.1': 31, 'ENST00000681611.1': 31}	{'ENST00000681615.1': 'chr6', 'ENST00000681611.1': 'chr6'}	{'ENST00000681615.1': 99401630.0, 'ENST00000681611.1': 99400311.0}	{'ENST00000681615.1': 99402539.0, 'ENST00000681611.1': 99402539.0}	{'ENST00000681615.1': '-', 'ENST00000681611.1': '-'}	ENST00000681615.1	Intron	protein_coding	31	chr6	99401630	99402539	-	['ENST00000681615.1', 'ENST00000681611.1']	[]	ENST00000681615.1	Intron	protein_coding	31	chr6	99401630	99402539	-	[]	[]	ENST00000681615.1	Intron	protein_coding	31	chr6	99401630	99402539	-	ENST00000681615.1	Intron	protein_coding	31	chr6	99401630	99402539	-
Merged-chr6-137197502-1	chr6	137197465	137197539	-	0	{'ENST00000458076.6': '3UTR', 'ENST00000696693.1': '3UTR', 'ENST00000696694.1': '3UTR', 'ENST00000647124.1': '3UTR'}	{'ENST00000458076.6': 'protein_coding', 'ENST00000696693.1': 'protein_coding', 'ENST00000696694.1': 'protein_coding', 'ENST00000647124.1': 'protein_coding'}	{'ENST00000458076.6': 57, 'ENST00000696693.1': 55, 'ENST00000696694.1': 55, 'ENST00000647124.1': 43}	{'ENST00000458076.6': 'chr6', 'ENST00000696693.1': 'chr6', 'ENST00000696694.1': 'chr6', 'ENST00000647124.1': 'chr6'}	{'ENST00000458076.6': 137197483.0, 'ENST00000696693.1': 137197485.0, 'ENST00000696694.1': 137197485.0, 'ENST00000647124.1': 137197497.0}	{'ENST00000458076.6': 137198033.0, 'ENST00000696693.1': 137198033.0, 'ENST00000696694.1': 137198601.0, 'ENST00000647124.1': 137198033.0}	{'ENST00000458076.6': '-', 'ENST00000696693.1': '-', 'ENST00000696694.1': '-', 'ENST00000647124.1': '-'}	ENST00000458076.6	3UTR	protein_coding	57	chr6	137197483	137198033	-	['ENST00000458076.6', 'ENST00000696693.1', 'ENST00000696694.1', 'ENST00000647124.1']	[]	ENST00000458076.6	3UTR	protein_coding	57	chr6	137197483	137198033	-	[]	['ENST00000458076.6', 'ENST00000696693.1', 'ENST00000696694.1', 'ENST00000647124.1']	ENST00000458076.6	3UTR	protein_coding	57	chr6	137197483	137198033	-	ENST00000458076.6	3UTR	protein_coding	57	chr6	137197483	137198033	-
Merged-chr6-167962465-1	chr6	167962428	167962502	+	0	{'ENST00000392108.7': 'CDS', 'ENST00000344191.8': 'Intron', 'ENST00000515794.3': 'Intron', 'ENST00000683244.1': 'Intron'}	{'ENST00000392108.7': 'protein_coding', 'ENST00000344191.8': 'protein_coding', 'ENST00000515794.3': 'protein_coding', 'ENST00000683244.1': 'protein_coding'}	{'ENST00000392108.7': 64, 'ENST00000344191.8': 4, 'ENST00000515794.3': 10, 'ENST00000683244.1': 4}	{'ENST00000392108.7': 'chr6', 'ENST00000344191.8': 'chr6', 'ENST00000515794.3': 'chr6', 'ENST00000683244.1': 'chr6'}	{'ENST00000392108.7': 167962439.0, 'ENST00000344191.8': 167954493.0, 'ENST00000515794.3': 167952187.0, 'ENST00000683244.1': 167952187.0}	{'ENST00000392108.7': 167962579.0, 'ENST00000344191.8': 167962432.0, 'ENST00000515794.3': 167962438.0, 'ENST00000683244.1': 167962432.0}	{'ENST00000392108.7': '+', 'ENST00000344191.8': '+', 'ENST00000515794.3': '+', 'ENST00000683244.1': '+'}	ENST00000392108.7	CDS	protein_coding	64	chr6	167962439	167962579	+	['ENST00000392108.7', 'ENST00000344191.8', 'ENST00000515794.3', 'ENST00000683244.1']	['ENST00000683244.1']	ENST00000683244.1	Intron	protein_coding	4	chr6	167952187	167962432	+	[]	[]	ENST00000683244.1	Intron	protein_coding	4	chr6	167952187	167962432	+	ENST00000683244.1	Intron	protein_coding	4	chr6	167952187	167962432	+
Merged-chr6-10724610-1	chr6	10724573	10724647	+	0	{'ENST00000229563.6': 'AltUTR', 'ENST00000541412.5': 'Intron'}	{'ENST00000229563.6': 'protein_coding', 'ENST00000541412.5': 'protein_coding'}	{'ENST00000229563.6': 40, 'ENST00000541412.5': 15}	{'ENST00000229563.6': 'chr6', 'ENST00000541412.5': 'chr6'}	{'ENST00000229563.6': 10724570.0, 'ENST00000541412.5': 10724633.0}	{'ENST00000229563.6': 10724613.0, 'ENST00000541412.5': 10724960.0}	{'ENST00000229563.6': '+', 'ENST00000541412.5': '+'}	ENST00000229563.6	AltUTR	protein_coding	40	chr6	10724570	10724613	+	['ENST00000229563.6', 'ENST00000541412.5']	['ENST00000229563.6']	ENST00000229563.6	AltUTR	protein_coding	40	chr6	10724570	10724613	+	[]	[]	ENST00000229563.6	AltUTR	protein_coding	40	chr6	10724570	10724613	+	ENST00000229563.6	AltUTR	protein_coding	40	chr6	10724570	10724613	+
Merged-chr6-30626091-1	chr6	30626054	30626128	+	0	{'ENST00000259873.5': '3UTR'}	{'ENST00000259873.5': 'protein_coding'}	{'ENST00000259873.5': 74}	{'ENST00000259873.5': 'chr6'}	{'ENST00000259873.5': 30625795.0}	{'ENST00000259873.5': 30626392.0}	{'ENST00000259873.5': '+'}	ENST00000259873.5	3UTR	protein_coding	74	chr6	30625795	30626392	+	['ENST00000259873.5']	['ENST00000259873.5']	ENST00000259873.5	3UTR	protein_coding	74	chr6	30625795	30626392	+	[]	['ENST00000259873.5']	ENST00000259873.5	3UTR	protein_coding	74	chr6	30625795	30626392	+	ENST00000259873.5	3UTR	protein_coding	74	chr6	30625795	30626392	+
Merged-chr19-11987776-1	chr19	11987739	11987813	+	0	{'ENST00000406892.6': 'exon', 'ENST00000495324.5': 'exon', 'ENST00000489336.5': 'exon', 'ENST00000476474.5': 'exon', 'ENST00000589551.1': 'exon', 'ENST00000652448.1': 'exon'}	{'ENST00000406892.6': 'lncRNA', 'ENST00000495324.5': 'lncRNA', 'ENST00000489336.5': 'lncRNA', 'ENST00000476474.5': 'lncRNA', 'ENST00000589551.1': 'lncRNA', 'ENST00000652448.1': 'protein_coding'}	{'ENST00000406892.6': 74, 'ENST00000495324.5': 74, 'ENST00000489336.5': 74, 'ENST00000476474.5': 74, 'ENST00000589551.1': 47, 'ENST00000652448.1': 74}	{'ENST00000406892.6': 'chr19', 'ENST00000495324.5': 'chr19', 'ENST00000489336.5': 'chr19', 'ENST00000476474.5': 'chr19', 'ENST00000589551.1': 'chr19', 'ENST00000652448.1': 'chr19'}	{'ENST00000406892.6': 11987617.0, 'ENST00000495324.5': 11987656.0, 'ENST00000489336.5': 11987671.0, 'ENST00000476474.5': 11987679.0, 'ENST00000589551.1': 11987767.0, 'ENST00000652448.1': 11987641.0}	{'ENST00000406892.6': 11987823.0, 'ENST00000495324.5': 11987823.0, 'ENST00000489336.5': 11987823.0, 'ENST00000476474.5': 11987823.0, 'ENST00000589551.1': 11987823.0, 'ENST00000652448.1': 11987823.0}	{'ENST00000406892.6': '+', 'ENST00000495324.5': '+', 'ENST00000489336.5': '+', 'ENST00000476474.5': '+', 'ENST00000589551.1': '+', 'ENST00000652448.1': '+'}	ENST00000476474.5	exon	lncRNA	74	chr19	11987679	11987823	+	['ENST00000406892.6', 'ENST00000495324.5', 'ENST00000489336.5', 'ENST00000476474.5', 'ENST00000589551.1', 'ENST00000652448.1']	[]	ENST00000476474.5	exon	lncRNA	74	chr19	11987679	11987823	+	[]	[]	ENST00000476474.5	exon	lncRNA	74	chr19	11987679	11987823	+	ENST00000476474.5	exon	lncRNA	74	chr19	11987679	11987823	+
Merged-chr19-12953633-1	chr19	12953596	12953670	+	0	{'ENST00000586534.6': '3UTR', 'ENST00000316856.7': '3UTR', 'ENST00000316939.3': '3UTR'}	{'ENST00000586534.6': 'protein_coding', 'ENST00000316856.7': 'protein_coding', 'ENST00000316939.3': 'protein_coding'}	{'ENST00000586534.6': 46, 'ENST00000316856.7': 27, 'ENST00000316939.3': 74}	{'ENST00000586534.6': 'chr19', 'ENST00000316856.7': 'chr19', 'ENST00000316939.3': 'chr19'}	{'ENST00000586534.6': 12953047.0, 'ENST00000316856.7': 12953047.0, 'ENST00000316939.3': 12953119.0}	{'ENST00000586534.6': 12953642.0, 'ENST00000316856.7': 12953623.0, 'ENST00000316939.3': 12954210.0}	{'ENST00000586534.6': '+', 'ENST00000316856.7': '+', 'ENST00000316939.3': '-'}	ENST00000316939.3	3UTR	protein_coding	74	chr19	12953119	12954210	-	['ENST00000586534.6', 'ENST00000316856.7', 'ENST00000316939.3']	['ENST00000586534.6', 'ENST00000316939.3']	ENST00000316939.3	3UTR	protein_coding	74	chr19	12953119	12954210	-	[]	['ENST00000586534.6', 'ENST00000316856.7', 'ENST00000316939.3']	ENST00000316939.3	3UTR	protein_coding	74	chr19	12953119	12954210	-	ENST00000316939.3	3UTR	protein_coding	74	chr19	12953119	12954210	-
Merged-chr19-13104918-1	chr19	13104881	13104955	-	0	{'ENST00000437766.5': '3UTR', 'ENST00000221504.12': '3UTR'}	{'ENST00000437766.5': 'protein_coding', 'ENST00000221504.12': 'protein_coding'}	{'ENST00000437766.5': 36, 'ENST00000221504.12': 31}	{'ENST00000437766.5': 'chr19', 'ENST00000221504.12': 'chr19'}	{'ENST00000437766.5': 13104902.0, 'ENST00000221504.12': 13104907.0}	{'ENST00000437766.5': 13104937.0, 'ENST00000221504.12': 13104937.0}	{'ENST00000437766.5': '-', 'ENST00000221504.12': '-'}	ENST00000437766.5	3UTR	protein_coding	36	chr19	13104902	13104937	-	['ENST00000437766.5', 'ENST00000221504.12']	[]	ENST00000437766.5	3UTR	protein_coding	36	chr19	13104902	13104937	-	[]	['ENST00000437766.5', 'ENST00000221504.12']	ENST00000437766.5	3UTR	protein_coding	36	chr19	13104902	13104937	-	ENST00000437766.5	3UTR	protein_coding	36	chr19	13104902	13104937	-
Merged-chr19-14408838-1	chr19	14408801	14408875	-	0	{'ENST00000242776.9': '3UTR'}	{'ENST00000242776.9': 'protein_coding'}	{'ENST00000242776.9': 74}	{'ENST00000242776.9': 'chr19'}	{'ENST00000242776.9': 14408798.0}	{'ENST00000242776.9': 14408938.0}	{'ENST00000242776.9': '-'}	ENST00000242776.9	3UTR	protein_coding	74	chr19	14408798	14408938	-	['ENST00000242776.9']	['ENST00000242776.9']	ENST00000242776.9	3UTR	protein_coding	74	chr19	14408798	14408938	-	[]	['ENST00000242776.9']	ENST00000242776.9	3UTR	protein_coding	74	chr19	14408798	14408938	-	ENST00000242776.9	3UTR	protein_coding	74	chr19	14408798	14408938	-
Merged-chr6-42880913-1	chr6	42880876	42880950	+	0	{'ENST00000493763.7': 'exon'}	{'ENST00000493763.7': 'protein_coding'}	{'ENST00000493763.7': 74}	{'ENST00000493763.7': 'chr6'}	{'ENST00000493763.7': 42880861.0}	{'ENST00000493763.7': 42880966.0}	{'ENST00000493763.7': '+'}	ENST00000493763.7	exon	protein_coding	74	chr6	42880861	42880966	+	['ENST00000493763.7']	['ENST00000493763.7']	ENST00000493763.7	exon	protein_coding	74	chr6	42880861	42880966	+	[]	[]	ENST00000493763.7	exon	protein_coding	74	chr6	42880861	42880966	+	ENST00000493763.7	exon	protein_coding	74	chr6	42880861	42880966	+
Merged-chr6-56614329-1	chr6	56614292	56614366	-	0	{'ENST00000244364.10': 'Intron'}	{'ENST00000244364.10': 'protein_coding'}	{'ENST00000244364.10': 63}	{'ENST00000244364.10': 'chr6'}	{'ENST00000244364.10': 56611596.0}	{'ENST00000244364.10': 56614355.0}	{'ENST00000244364.10': '-'}	ENST00000244364.10	Intron	protein_coding	63	chr6	56611596	56614355	-	['ENST00000244364.10']	[]	ENST00000244364.10	Intron	protein_coding	63	chr6	56611596	56614355	-	[]	[]	ENST00000244364.10	Intron	protein_coding	63	chr6	56611596	56614355	-	ENST00000244364.10	Intron	protein_coding	63	chr6	56611596	56614355	-
Merged-chr6-57331099-1	chr6	57331062	57331136	+	0	{'ENST00000671770.1': 'Intron', 'ENST00000672107.1': 'Intron'}	{'ENST00000671770.1': 'protein_coding', 'ENST00000672107.1': 'protein_coding'}	{'ENST00000671770.1': 74, 'ENST00000672107.1': 74}	{'ENST00000671770.1': 'chr6', 'ENST00000672107.1': 'chr6'}	{'ENST00000671770.1': 57326045.0, 'ENST00000672107.1': 57326045.0}	{'ENST00000671770.1': 57378250.0, 'ENST00000672107.1': 57379900.0}	{'ENST00000671770.1': '+', 'ENST00000672107.1': '+'}	ENST00000671770.1	Intron	protein_coding	74	chr6	57326045	57378250	+	['ENST00000671770.1', 'ENST00000672107.1']	[]	ENST00000671770.1	Intron	protein_coding	74	chr6	57326045	57378250	+	[]	[]	ENST00000671770.1	Intron	protein_coding	74	chr6	57326045	57378250	+	ENST00000671770.1	Intron	protein_coding	74	chr6	57326045	57378250	+
Merged-chr6-75252938-1	chr6	75252901	75252975	-	0	{'ENST00000230461.11': '3UTR', 'ENST00000673730.1': '3UTR', 'ENST00000674151.1': '3UTR'}	{'ENST00000230461.11': 'protein_coding', 'ENST00000673730.1': 'protein_coding', 'ENST00000674151.1': 'protein_coding'}	{'ENST00000230461.11': 52, 'ENST00000673730.1': 39, 'ENST00000674151.1': 12}	{'ENST00000230461.11': 'chr6', 'ENST00000673730.1': 'chr6', 'ENST00000674151.1': 'chr6'}	{'ENST00000230461.11': 75252924.0, 'ENST00000673730.1': 75252937.0, 'ENST00000674151.1': 75252964.0}	{'ENST00000230461.11': 75256104.0, 'ENST00000673730.1': 75256104.0, 'ENST00000674151.1': 75256104.0}	{'ENST00000230461.11': '-', 'ENST00000673730.1': '-', 'ENST00000674151.1': '-'}	ENST00000230461.11	3UTR	protein_coding	52	chr6	75252924	75256104	-	['ENST00000230461.11', 'ENST00000673730.1', 'ENST00000674151.1']	['ENST00000230461.11']	ENST00000230461.11	3UTR	protein_coding	52	chr6	75252924	75256104	-	[]	['ENST00000230461.11', 'ENST00000673730.1', 'ENST00000674151.1']	ENST00000230461.11	3UTR	protein_coding	52	chr6	75252924	75256104	-	ENST00000230461.11	3UTR	protein_coding	52	chr6	75252924	75256104	-
Merged-chr19-18577451-1	chr19	18577414	18577488	+	0	{'ENST00000442744.7': '3UTR'}	{'ENST00000442744.7': 'protein_coding'}	{'ENST00000442744.7': 74}	{'ENST00000442744.7': 'chr19'}	{'ENST00000442744.7': 18575148.0}	{'ENST00000442744.7': 18577550.0}	{'ENST00000442744.7': '+'}	ENST00000442744.7	3UTR	protein_coding	74	chr19	18575148	18577550	+	['ENST00000442744.7']	['ENST00000442744.7']	ENST00000442744.7	3UTR	protein_coding	74	chr19	18575148	18577550	+	[]	['ENST00000442744.7']	ENST00000442744.7	3UTR	protein_coding	74	chr19	18575148	18577550	+	ENST00000442744.7	3UTR	protein_coding	74	chr19	18575148	18577550	+
Merged-chr19-32649683-1	chr19	32649646	32649720	-	0	{'ENST00000306065.9': 'Intron'}	{'ENST00000306065.9': 'protein_coding'}	{'ENST00000306065.9': 35}	{'ENST00000306065.9': 'chr19'}	{'ENST00000306065.9': 32646615.0}	{'ENST00000306065.9': 32649681.0}	{'ENST00000306065.9': '-'}	ENST00000306065.9	Intron	protein_coding	35	chr19	32646615	32649681	-	['ENST00000306065.9']	['ENST00000306065.9']	ENST00000306065.9	Intron	protein_coding	35	chr19	32646615	32649681	-	[]	[]	ENST00000306065.9	Intron	protein_coding	35	chr19	32646615	32649681	-	ENST00000306065.9	Intron	protein_coding	35	chr19	32646615	32649681	-
Merged-chr6-111714383-1	chr6	111714346	111714420	-	0	{'ENST00000354650.7': 'exon'}	{'ENST00000354650.7': 'protein_coding'}	{'ENST00000354650.7': 74}	{'ENST00000354650.7': 'chr6'}	{'ENST00000354650.7': 111714347.0}	{'ENST00000354650.7': 111714443.0}	{'ENST00000354650.7': '-'}	ENST00000354650.7	exon	protein_coding	74	chr6	111714347	111714443	-	['ENST00000354650.7']	['ENST00000354650.7']	ENST00000354650.7	exon	protein_coding	74	chr6	111714347	111714443	-	[]	[]	ENST00000354650.7	exon	protein_coding	74	chr6	111714347	111714443	-	ENST00000354650.7	exon	protein_coding	74	chr6	111714347	111714443	-
Merged-chr6-122444013-1	chr6	122443976	122444050	-	0	{'ENST00000339697.5': '3UTR'}	{'ENST00000339697.5': 'protein_coding'}	{'ENST00000339697.5': 74}	{'ENST00000339697.5': 'chr6'}	{'ENST00000339697.5': 122443351.0}	{'ENST00000339697.5': 122445046.0}	{'ENST00000339697.5': '-'}	ENST00000339697.5	3UTR	protein_coding	74	chr6	122443351	122445046	-	['ENST00000339697.5']	['ENST00000339697.5']	ENST00000339697.5	3UTR	protein_coding	74	chr6	122443351	122445046	-	[]	['ENST00000339697.5']	ENST00000339697.5	3UTR	protein_coding	74	chr6	122443351	122445046	-	ENST00000339697.5	3UTR	protein_coding	74	chr6	122443351	122445046	-
Merged-chr6-127343394-1	chr6	127343357	127343431	-	0	{'ENST00000454859.8': 'exon', 'ENST00000528402.5': 'exon', 'ENST00000454591.6': 'exon', 'ENST00000368291.6': 'exon', 'ENST00000430841.6': 'exon', 'ENST00000368289.6': 'exon'}	{'ENST00000454859.8': 'protein_coding', 'ENST00000528402.5': 'protein_coding', 'ENST00000454591.6': 'protein_coding', 'ENST00000368291.6': 'protein_coding', 'ENST00000430841.6': 'protein_coding', 'ENST00000368289.6': 'protein_coding'}	{'ENST00000454859.8': 74, 'ENST00000528402.5': 74, 'ENST00000454591.6': 74, 'ENST00000368291.6': 74, 'ENST00000430841.6': 41, 'ENST00000368289.6': 2}	{'ENST00000454859.8': 'chr6', 'ENST00000528402.5': 'chr6', 'ENST00000454591.6': 'chr6', 'ENST00000368291.6': 'chr6', 'ENST00000430841.6': 'chr6', 'ENST00000368289.6': 'chr6'}	{'ENST00000454859.8': 127343336.0, 'ENST00000528402.5': 127343336.0, 'ENST00000454591.6': 127343336.0, 'ENST00000368291.6': 127343336.0, 'ENST00000430841.6': 127343336.0, 'ENST00000368289.6': 127343336.0}	{'ENST00000454859.8': 127343609.0, 'ENST00000528402.5': 127343549.0, 'ENST00000454591.6': 127343562.0, 'ENST00000368291.6': 127343599.0, 'ENST00000430841.6': 127343398.0, 'ENST00000368289.6': 127343359.0}	{'ENST00000454859.8': '-', 'ENST00000528402.5': '-', 'ENST00000454591.6': '-', 'ENST00000368291.6': '-', 'ENST00000430841.6': '-', 'ENST00000368289.6': '-'}	ENST00000454859.8	exon	protein_coding	74	chr6	127343336	127343609	-	['ENST00000454859.8', 'ENST00000528402.5', 'ENST00000454591.6', 'ENST00000368291.6', 'ENST00000430841.6', 'ENST00000368289.6']	['ENST00000454859.8']	ENST00000454859.8	exon	protein_coding	74	chr6	127343336	127343609	-	[]	[]	ENST00000454859.8	exon	protein_coding	74	chr6	127343336	127343609	-	ENST00000454859.8	exon	protein_coding	74	chr6	127343336	127343609	-
Merged-chr6-132817071-1	chr6	132817034	132817108	+	0	{'ENST00000230050.4': 'Intron'}	{'ENST00000230050.4': 'protein_coding'}	{'ENST00000230050.4': 48}	{'ENST00000230050.4': 'chr6'}	{'ENST00000230050.4': 132817061.0}	{'ENST00000230050.4': 132817479.0}	{'ENST00000230050.4': '+'}	ENST00000230050.4	Intron	protein_coding	48	chr6	132817061	132817479	+	['ENST00000230050.4']	['ENST00000230050.4']	ENST00000230050.4	Intron	protein_coding	48	chr6	132817061	132817479	+	[]	[]	ENST00000230050.4	Intron	protein_coding	48	chr6	132817061	132817479	+	ENST00000230050.4	Intron	protein_coding	48	chr6	132817061	132817479	+
Merged-chr6-149505524-1	chr6	149505487	149505561	-	0	{'ENST00000253329.3': 'CDS', 'ENST00000340881.2': 'CDS'}	{'ENST00000253329.3': 'protein_coding', 'ENST00000340881.2': 'protein_coding'}	{'ENST00000253329.3': 74, 'ENST00000340881.2': 74}	{'ENST00000253329.3': 'chr6', 'ENST00000340881.2': 'chr6'}	{'ENST00000253329.3': 149505456.0, 'ENST00000340881.2': 149505449.0}	{'ENST00000253329.3': 149505704.0, 'ENST00000340881.2': 149505704.0}	{'ENST00000253329.3': '-', 'ENST00000340881.2': '-'}	ENST00000253329.3	CDS	protein_coding	74	chr6	149505456	149505704	-	['ENST00000253329.3', 'ENST00000340881.2']	['ENST00000253329.3']	ENST00000253329.3	CDS	protein_coding	74	chr6	149505456	149505704	-	[]	[]	ENST00000253329.3	CDS	protein_coding	74	chr6	149505456	149505704	-	ENST00000253329.3	CDS	protein_coding	74	chr6	149505456	149505704	-
Merged-chr19-41268289-1	chr19	41268252	41268326	+	0	{'ENST00000352456.7': 'CDS', 'ENST00000617774.1': 'Intron'}	{'ENST00000352456.7': 'protein_coding', 'ENST00000617774.1': 'protein_coding'}	{'ENST00000352456.7': 74, 'ENST00000617774.1': 74}	{'ENST00000352456.7': 'chr19', 'ENST00000617774.1': 'chr19'}	{'ENST00000352456.7': 41268228.0, 'ENST00000617774.1': 41264692.0}	{'ENST00000352456.7': 41268345.0, 'ENST00000617774.1': 41291878.0}	{'ENST00000352456.7': '+', 'ENST00000617774.1': '+'}	ENST00000352456.7	CDS	protein_coding	74	chr19	41268228	41268345	+	['ENST00000352456.7', 'ENST00000617774.1']	[]	ENST00000352456.7	CDS	protein_coding	74	chr19	41268228	41268345	+	[]	[]	ENST00000352456.7	CDS	protein_coding	74	chr19	41268228	41268345	+	ENST00000352456.7	CDS	protein_coding	74	chr19	41268228	41268345	+
Merged-chr6-170283262-1	chr6	170283225	170283299	-	0	{'ENST00000366756.4': 'Intron'}	{'ENST00000366756.4': 'protein_coding'}	{'ENST00000366756.4': 5}	{'ENST00000366756.4': 'chr6'}	{'ENST00000366756.4': 170283105.0}	{'ENST00000366756.4': 170283230.0}	{'ENST00000366756.4': '-'}	ENST00000366756.4	Intron	protein_coding	5	chr6	170283105	170283230	-	['ENST00000366756.4']	['ENST00000366756.4']	ENST00000366756.4	Intron	protein_coding	5	chr6	170283105	170283230	-	[]	[]	ENST00000366756.4	Intron	protein_coding	5	chr6	170283105	170283230	-	ENST00000366756.4	Intron	protein_coding	5	chr6	170283105	170283230	-
Merged-chr6-24719745-1	chr6	24719708	24719782	-	0	{'ENST00000710317.1': '5UTR', 'ENST00000378102.3': 'Intron'}	{'ENST00000710317.1': 'protein_coding', 'ENST00000378102.3': 'protein_coding'}	{'ENST00000710317.1': 74, 'ENST00000378102.3': 74}	{'ENST00000710317.1': 'chr6', 'ENST00000378102.3': 'chr6'}	{'ENST00000710317.1': 24718669.0, 'ENST00000378102.3': 24716324.0}	{'ENST00000710317.1': 24720825.0, 'ENST00000378102.3': 24719859.0}	{'ENST00000710317.1': '-', 'ENST00000378102.3': '-'}	ENST00000710317.1	5UTR	protein_coding	74	chr6	24718669	24720825	-	['ENST00000710317.1', 'ENST00000378102.3']	[]	ENST00000710317.1	5UTR	protein_coding	74	chr6	24718669	24720825	-	['ENST00000710317.1']	[]	ENST00000710317.1	5UTR	protein_coding	74	chr6	24718669	24720825	-	ENST00000710317.1	5UTR	protein_coding	74	chr6	24718669	24720825	-
Merged-chr6-30605954-1	chr6	30605917	30605991	-	0	{'ENST00000376511.7': 'Intron'}	{'ENST00000376511.7': 'protein_coding'}	{'ENST00000376511.7': 5}	{'ENST00000376511.7': 'chr6'}	{'ENST00000376511.7': 30605094.0}	{'ENST00000376511.7': 30605922.0}	{'ENST00000376511.7': '-'}	ENST00000376511.7	Intron	protein_coding	5	chr6	30605094	30605922	-	['ENST00000376511.7']	['ENST00000376511.7']	ENST00000376511.7	Intron	protein_coding	5	chr6	30605094	30605922	-	[]	[]	ENST00000376511.7	Intron	protein_coding	5	chr6	30605094	30605922	-	ENST00000376511.7	Intron	protein_coding	5	chr6	30605094	30605922	-
Merged-chr19-48874304-1	chr19	48874267	48874341	+	0	{'ENST00000704026.1': 'exon', 'ENST00000600406.2': 'CDS', 'ENST00000200453.6': 'CDS', 'ENST00000704027.1': 'CDS'}	{'ENST00000704026.1': 'protein_coding', 'ENST00000600406.2': 'protein_coding', 'ENST00000200453.6': 'protein_coding', 'ENST00000704027.1': 'protein_coding'}	{'ENST00000704026.1': 74, 'ENST00000600406.2': 74, 'ENST00000200453.6': 74, 'ENST00000704027.1': 74}	{'ENST00000704026.1': 'chr19', 'ENST00000600406.2': 'chr19', 'ENST00000200453.6': 'chr19', 'ENST00000704027.1': 'chr19'}	{'ENST00000704026.1': 48873874.0, 'ENST00000600406.2': 48873234.0, 'ENST00000200453.6': 48873234.0, 'ENST00000704027.1': 48873186.0}	{'ENST00000704026.1': 48874898.0, 'ENST00000600406.2': 48875090.0, 'ENST00000200453.6': 48874898.0, 'ENST00000704027.1': 48874898.0}	{'ENST00000704026.1': '+', 'ENST00000600406.2': '+', 'ENST00000200453.6': '+', 'ENST00000704027.1': '+'}	ENST00000704026.1	exon	protein_coding	74	chr19	48873874	48874898	+	['ENST00000704026.1', 'ENST00000600406.2', 'ENST00000200453.6', 'ENST00000704027.1']	['ENST00000200453.6']	ENST00000200453.6	CDS	protein_coding	74	chr19	48873234	48874898	+	[]	[]	ENST00000200453.6	CDS	protein_coding	74	chr19	48873234	48874898	+	ENST00000200453.6	CDS	protein_coding	74	chr19	48873234	48874898	+
Merged-chr19-49340612-1	chr19	49340575	49340649	-	0	{'ENST00000323906.9': '3UTR', 'ENST00000598810.5': '3UTR', 'ENST00000377214.8': '3UTR'}	{'ENST00000323906.9': 'protein_coding', 'ENST00000598810.5': 'protein_coding', 'ENST00000377214.8': 'protein_coding'}	{'ENST00000323906.9': 31, 'ENST00000598810.5': 55, 'ENST00000377214.8': 50}	{'ENST00000323906.9': 'chr19', 'ENST00000598810.5': 'chr19', 'ENST00000377214.8': 'chr19'}	{'ENST00000323906.9': 49340326.0, 'ENST00000598810.5': 49340595.0, 'ENST00000377214.8': 49340600.0}	{'ENST00000323906.9': 49340606.0, 'ENST00000598810.5': 49341326.0, 'ENST00000377214.8': 49341326.0}	{'ENST00000323906.9': '+', 'ENST00000598810.5': '-', 'ENST00000377214.8': '-'}	ENST00000598810.5	3UTR	protein_coding	55	chr19	49340595	49341326	-	['ENST00000323906.9', 'ENST00000598810.5', 'ENST00000377214.8']	['ENST00000323906.9']	ENST00000323906.9	3UTR	protein_coding	31	chr19	49340326	49340606	+	[]	['ENST00000323906.9', 'ENST00000598810.5', 'ENST00000377214.8']	ENST00000598810.5	3UTR	protein_coding	55	chr19	49340595	49341326	-	ENST00000323906.9	3UTR	protein_coding	31	chr19	49340326	49340606	+
Merged-chr19-54441899-1	chr19	54441862	54441936	-	0	{'Intergenic': 'Unlabeled'}	{'Intergenic': 'Intergenic'}	{'Intergenic': 0}	{'Intergenic': nan}	{'Intergenic': nan}	{'Intergenic': nan}	{'Intergenic': '-'}	Intergenic	Unlabeled	Intergenic	0				-	['Intergenic']	[]	Intergenic	Unlabeled	Intergenic	0				-	[]	[]	Intergenic	Unlabeled	Intergenic	0				-	Intergenic	Unlabeled	Intergenic	0				-
Merged-chr19-56629608-1	chr19	56629571	56629645	+	0	{'ENST00000650950.1': 'Intron'}	{'ENST00000650950.1': 'lncRNA'}	{'ENST00000650950.1': 74}	{'ENST00000650950.1': 'chr19'}	{'ENST00000650950.1': 56601591.0}	{'ENST00000650950.1': 56667276.0}	{'ENST00000650950.1': '+'}	ENST00000650950.1	Intron	lncRNA	74	chr19	56601591	56667276	+	['ENST00000650950.1']	[]	ENST00000650950.1	Intron	lncRNA	74	chr19	56601591	56667276	+	[]	[]	ENST00000650950.1	Intron	lncRNA	74	chr19	56601591	56667276	+	ENST00000650950.1	Intron	lncRNA	74	chr19	56601591	56667276	+
Merged-chr19-58132691-1	chr19	58132654	58132728	+	0	{'ENST00000597186.5': 'Intron', 'ENST00000598312.6': 'Intron'}	{'ENST00000597186.5': 'protein_coding', 'ENST00000598312.6': 'protein_coding'}	{'ENST00000597186.5': 53, 'ENST00000598312.6': 74}	{'ENST00000597186.5': 'chr19', 'ENST00000598312.6': 'chr19'}	{'ENST00000597186.5': 58132676.0, 'ENST00000598312.6': 58129511.0}	{'ENST00000597186.5': 58142556.0, 'ENST00000598312.6': 58142556.0}	{'ENST00000597186.5': '-', 'ENST00000598312.6': '-'}	ENST00000598312.6	Intron	protein_coding	74	chr19	58129511	58142556	-	['ENST00000597186.5', 'ENST00000598312.6']	['ENST00000598312.6']	ENST00000598312.6	Intron	protein_coding	74	chr19	58129511	58142556	-	[]	[]	ENST00000598312.6	Intron	protein_coding	74	chr19	58129511	58142556	-	ENST00000598312.6	Intron	protein_coding	74	chr19	58129511	58142556	-
Merged-chr19-58582128-1	chr19	58582091	58582165	+	0	{'ENST00000651608.1': 'exon'}	{'ENST00000651608.1': 'transcribed_processed_pseudogene'}	{'ENST00000651608.1': 74}	{'ENST00000651608.1': 'chr19'}	{'ENST00000651608.1': 58581245.0}	{'ENST00000651608.1': 58583172.0}	{'ENST00000651608.1': '+'}	ENST00000651608.1	exon	transcribed_processed_pseudogene	74	chr19	58581245	58583172	+	['ENST00000651608.1']	[]	ENST00000651608.1	exon	transcribed_processed_pseudogene	74	chr19	58581245	58583172	+	[]	[]	ENST00000651608.1	exon	transcribed_processed_pseudogene	74	chr19	58581245	58583172	+	ENST00000651608.1	exon	transcribed_processed_pseudogene	74	chr19	58581245	58583172	+
Merged-chr6-31797404-1	chr6	31797367	31797441	-	0	{'ENST00000375661.6': '3UTR'}	{'ENST00000375661.6': 'protein_coding'}	{'ENST00000375661.6': 46}	{'ENST00000375661.6': 'chr6'}	{'ENST00000375661.6': 31797396.0}	{'ENST00000375661.6': 31797759.0}	{'ENST00000375661.6': '-'}	ENST00000375661.6	3UTR	protein_coding	46	chr6	31797396	31797759	-	['ENST00000375661.6']	['ENST00000375661.6']	ENST00000375661.6	3UTR	protein_coding	46	chr6	31797396	31797759	-	[]	['ENST00000375661.6']	ENST00000375661.6	3UTR	protein_coding	46	chr6	31797396	31797759	-	ENST00000375661.6	3UTR	protein_coding	46	chr6	31797396	31797759	-
Merged-chr6-31952219-1	chr6	31952182	31952256	-	0	{'ENST00000375429.8': '3UTR', 'ENST00000375425.9': '3UTR'}	{'ENST00000375429.8': 'protein_coding', 'ENST00000375425.9': 'protein_coding'}	{'ENST00000375429.8': 74, 'ENST00000375425.9': 28}	{'ENST00000375429.8': 'chr6', 'ENST00000375425.9': 'chr6'}	{'ENST00000375429.8': 31952087.0, 'ENST00000375425.9': 31952229.0}	{'ENST00000375429.8': 31952303.0, 'ENST00000375425.9': 31952303.0}	{'ENST00000375429.8': '-', 'ENST00000375425.9': '-'}	ENST00000375429.8	3UTR	protein_coding	74	chr6	31952087	31952303	-	['ENST00000375429.8', 'ENST00000375425.9']	['ENST00000375429.8']	ENST00000375429.8	3UTR	protein_coding	74	chr6	31952087	31952303	-	[]	['ENST00000375429.8', 'ENST00000375425.9']	ENST00000375429.8	3UTR	protein_coding	74	chr6	31952087	31952303	-	ENST00000375429.8	3UTR	protein_coding	74	chr6	31952087	31952303	-
Merged-chr6-56555569-1	chr6	56555532	56555606	-	0	{'ENST00000244364.10': 'exon'}	{'ENST00000244364.10': 'protein_coding'}	{'ENST00000244364.10': 74}	{'ENST00000244364.10': 'chr6'}	{'ENST00000244364.10': 56555345.0}	{'ENST00000244364.10': 56555840.0}	{'ENST00000244364.10': '-'}	ENST00000244364.10	exon	protein_coding	74	chr6	56555345	56555840	-	['ENST00000244364.10']	[]	ENST00000244364.10	exon	protein_coding	74	chr6	56555345	56555840	-	[]	[]	ENST00000244364.10	exon	protein_coding	74	chr6	56555345	56555840	-	ENST00000244364.10	exon	protein_coding	74	chr6	56555345	56555840	-
Merged-chr6-63691936-1	chr6	63691899	63691973	+	0	{'ENST00000262043.8': 'exon'}	{'ENST00000262043.8': 'protein_coding'}	{'ENST00000262043.8': 74}	{'ENST00000262043.8': 'chr6'}	{'ENST00000262043.8': 63691737.0}	{'ENST00000262043.8': 63692043.0}	{'ENST00000262043.8': '+'}	ENST00000262043.8	exon	protein_coding	74	chr6	63691737	63692043	+	['ENST00000262043.8']	['ENST00000262043.8']	ENST00000262043.8	exon	protein_coding	74	chr6	63691737	63692043	+	[]	[]	ENST00000262043.8	exon	protein_coding	74	chr6	63691737	63692043	+	ENST00000262043.8	exon	protein_coding	74	chr6	63691737	63692043	+
Merged-chr19-1356460-1	chr19	1356423	1356497	+	0	{'ENST00000591806.6': 'exon', 'ENST00000652273.1': 'CDS', 'ENST00000415183.7': 'exon', 'ENST00000591337.7': 'Intron'}	{'ENST00000591806.6': 'protein_coding', 'ENST00000652273.1': 'protein_coding', 'ENST00000415183.7': 'protein_coding', 'ENST00000591337.7': 'protein_coding'}	{'ENST00000591806.6': 26, 'ENST00000652273.1': 26, 'ENST00000415183.7': 26, 'ENST00000591337.7': 49}	{'ENST00000591806.6': 'chr19', 'ENST00000652273.1': 'chr19', 'ENST00000415183.7': 'chr19', 'ENST00000591337.7': 'chr19'}	{'ENST00000591806.6': 1356314.0, 'ENST00000652273.1': 1356390.0, 'ENST00000415183.7': 1356364.0, 'ENST00000591337.7': 1356449.0}	{'ENST00000591806.6': 1356449.0, 'ENST00000652273.1': 1356449.0, 'ENST00000415183.7': 1356449.0, 'ENST00000591337.7': 1357008.0}	{'ENST00000591806.6': '+', 'ENST00000652273.1': '+', 'ENST00000415183.7': '+', 'ENST00000591337.7': '+'}	ENST00000591337.7	Intron	protein_coding	49	chr19	1356449	1357008	+	['ENST00000591806.6', 'ENST00000652273.1', 'ENST00000415183.7', 'ENST00000591337.7']	['ENST00000591337.7']	ENST00000591337.7	Intron	protein_coding	49	chr19	1356449	1357008	+	[]	[]	ENST00000591337.7	Intron	protein_coding	49	chr19	1356449	1357008	+	ENST00000591337.7	Intron	protein_coding	49	chr19	1356449	1357008	+
Merged-chr19-1458087-1	chr19	1458050	1458124	+	0	{'ENST00000591252.2': 'exon', 'ENST00000590469.6': 'Intron'}	{'ENST00000591252.2': 'lncRNA', 'ENST00000590469.6': 'protein_coding'}	{'ENST00000591252.2': 74, 'ENST00000590469.6': 65}	{'ENST00000591252.2': 'chr19', 'ENST00000590469.6': 'chr19'}	{'ENST00000591252.2': 1457670.0, 'ENST00000590469.6': 1458060.0}	{'ENST00000591252.2': 1458580.0, 'ENST00000590469.6': 1460180.0}	{'ENST00000591252.2': '-', 'ENST00000590469.6': '+'}	ENST00000591252.2	exon	lncRNA	74	chr19	1457670	1458580	-	['ENST00000591252.2', 'ENST00000590469.6']	['ENST00000590469.6']	ENST00000590469.6	Intron	protein_coding	65	chr19	1458060	1460180	+	[]	[]	ENST00000590469.6	Intron	protein_coding	65	chr19	1458060	1460180	+	ENST00000590469.6	Intron	protein_coding	65	chr19	1458060	1460180	+
Merged-chr19-1572510-1	chr19	1572473	1572547	-	0	{'Intergenic': 'Unlabeled'}	{'Intergenic': 'Intergenic'}	{'Intergenic': 0}	{'Intergenic': nan}	{'Intergenic': nan}	{'Intergenic': nan}	{'Intergenic': '-'}	Intergenic	Unlabeled	Intergenic	0				-	['Intergenic']	[]	Intergenic	Unlabeled	Intergenic	0				-	[]	[]	Intergenic	Unlabeled	Intergenic	0				-	Intergenic	Unlabeled	Intergenic	0				-
Merged-chr19-1815331-1	chr19	1815294	1815368	-	0	{'ENST00000170168.9': '3UTR', 'ENST00000586259.1': 'exon'}	{'ENST00000170168.9': 'protein_coding', 'ENST00000586259.1': 'lncRNA'}	{'ENST00000170168.9': 74, 'ENST00000586259.1': 74}	{'ENST00000170168.9': 'chr19', 'ENST00000586259.1': 'chr19'}	{'ENST00000170168.9': 1815248.0, 'ENST00000586259.1': 1815249.0}	{'ENST00000170168.9': 1816068.0, 'ENST00000586259.1': 1815586.0}	{'ENST00000170168.9': '-', 'ENST00000586259.1': '+'}	ENST00000586259.1	exon	lncRNA	74	chr19	1815249	1815586	+	['ENST00000170168.9', 'ENST00000586259.1']	['ENST00000170168.9']	ENST00000170168.9	3UTR	protein_coding	74	chr19	1815248	1816068	-	[]	['ENST00000170168.9']	ENST00000170168.9	3UTR	protein_coding	74	chr19	1815248	1816068	-	ENST00000170168.9	3UTR	protein_coding	74	chr19	1815248	1816068	-
Merged-chr6-75890174-1	chr6	75890137	75890211	+	0	{'ENST00000369975.6': 'exon'}	{'ENST00000369975.6': 'protein_coding'}	{'ENST00000369975.6': 74}	{'ENST00000369975.6': 'chr6'}	{'ENST00000369975.6': 75890057.0}	{'ENST00000369975.6': 75890265.0}	{'ENST00000369975.6': '+'}	ENST00000369975.6	exon	protein_coding	74	chr6	75890057	75890265	+	['ENST00000369975.6']	[]	ENST00000369975.6	exon	protein_coding	74	chr6	75890057	75890265	+	[]	[]	ENST00000369975.6	exon	protein_coding	74	chr6	75890057	75890265	+	ENST00000369975.6	exon	protein_coding	74	chr6	75890057	75890265	+
Merged-chr6-75916217-1	chr6	75916180	75916254	+	0	{'ENST00000369975.6': '3UTR', 'ENST00000369985.9': '3UTR'}	{'ENST00000369975.6': 'protein_coding', 'ENST00000369985.9': 'protein_coding'}	{'ENST00000369975.6': 74, 'ENST00000369985.9': 74}	{'ENST00000369975.6': 'chr6', 'ENST00000369985.9': 'chr6'}	{'ENST00000369975.6': 75915010.0, 'ENST00000369985.9': 75915010.0}	{'ENST00000369975.6': 75916612.0, 'ENST00000369985.9': 75919537.0}	{'ENST00000369975.6': '+', 'ENST00000369985.9': '+'}	ENST00000369975.6	3UTR	protein_coding	74	chr6	75915010	75916612	+	['ENST00000369975.6', 'ENST00000369985.9']	[]	ENST00000369975.6	3UTR	protein_coding	74	chr6	75915010	75916612	+	[]	['ENST00000369975.6', 'ENST00000369985.9']	ENST00000369975.6	3UTR	protein_coding	74	chr6	75915010	75916612	+	ENST00000369975.6	3UTR	protein_coding	74	chr6	75915010	75916612	+
Merged-chr6-89365015-1	chr6	89364978	89365052	-	0	{'ENST00000369415.9': '3UTR', 'ENST00000359203.3': '3UTR'}	{'ENST00000369415.9': 'protein_coding', 'ENST00000359203.3': 'protein_coding'}	{'ENST00000369415.9': 74, 'ENST00000359203.3': 55}	{'ENST00000369415.9': 'chr6', 'ENST00000359203.3': 'chr6'}	{'ENST00000369415.9': 89364616.0, 'ENST00000359203.3': 89364998.0}	{'ENST00000369415.9': 89368058.0, 'ENST00000359203.3': 89368058.0}	{'ENST00000369415.9': '-', 'ENST00000359203.3': '-'}	ENST00000369415.9	3UTR	protein_coding	74	chr6	89364616	89368058	-	['ENST00000369415.9', 'ENST00000359203.3']	['ENST00000369415.9']	ENST00000369415.9	3UTR	protein_coding	74	chr6	89364616	89368058	-	[]	['ENST00000369415.9', 'ENST00000359203.3']	ENST00000369415.9	3UTR	protein_coding	74	chr6	89364616	89368058	-	ENST00000369415.9	3UTR	protein_coding	74	chr6	89364616	89368058	-
Merged-chr6-99408229-1	chr6	99408192	99408266	-	0	{'ENST00000681615.1': 'exon'}	{'ENST00000681615.1': 'protein_coding'}	{'ENST00000681615.1': 74}	{'ENST00000681615.1': 'chr6'}	{'ENST00000681615.1': 99408081.0}	{'ENST00000681615.1': 99408271.0}	{'ENST00000681615.1': '-'}	ENST00000681615.1	exon	protein_coding	74	chr6	99408081	99408271	-	['ENST00000681615.1']	[]	ENST00000681615.1	exon	protein_coding	74	chr6	99408081	99408271	-	[]	[]	ENST00000681615.1	exon	protein_coding	74	chr6	99408081	99408271	-	ENST00000681615.1	exon	protein_coding	74	chr6	99408081	99408271	-
Merged-chr8-60866556-1	chr8	60866519	60866593	+	0	{'ENST00000423902.7': '3UTR'}	{'ENST00000423902.7': 'protein_coding'}	{'ENST00000423902.7': 74}	{'ENST00000423902.7': 'chr8'}	{'ENST00000423902.7': 60865931.0}	{'ENST00000423902.7': 60868028.0}	{'ENST00000423902.7': '+'}	ENST00000423902.7	3UTR	protein_coding	74	chr8	60865931	60868028	+	['ENST00000423902.7']	['ENST00000423902.7']	ENST00000423902.7	3UTR	protein_coding	74	chr8	60865931	60868028	+	[]	['ENST00000423902.7']	ENST00000423902.7	3UTR	protein_coding	74	chr8	60865931	60868028	+	ENST00000423902.7	3UTR	protein_coding	74	chr8	60865931	60868028	+
Merged-chr8-96611745-1	chr8	96611708	96611782	+	0	{'ENST00000302190.9': '3UTR'}	{'ENST00000302190.9': 'protein_coding'}	{'ENST00000302190.9': 74}	{'ENST00000302190.9': 'chr8'}	{'ENST00000302190.9': 96609546.0}	{'ENST00000302190.9': 96611790.0}	{'ENST00000302190.9': '+'}	ENST00000302190.9	3UTR	protein_coding	74	chr8	96609546	96611790	+	['ENST00000302190.9']	['ENST00000302190.9']	ENST00000302190.9	3UTR	protein_coding	74	chr8	96609546	96611790	+	[]	['ENST00000302190.9']	ENST00000302190.9	3UTR	protein_coding	74	chr8	96609546	96611790	+	ENST00000302190.9	3UTR	protein_coding	74	chr8	96609546	96611790	+
Merged-chr8-97727883-1	chr8	97727846	97727920	+	0	{'ENST00000336273.8': '3UTR'}	{'ENST00000336273.8': 'protein_coding'}	{'ENST00000336273.8': 74}	{'ENST00000336273.8': 'chr8'}	{'ENST00000336273.8': 97724668.0}	{'ENST00000336273.8': 97730260.0}	{'ENST00000336273.8': '+'}	ENST00000336273.8	3UTR	protein_coding	74	chr8	97724668	97730260	+	['ENST00000336273.8']	['ENST00000336273.8']	ENST00000336273.8	3UTR	protein_coding	74	chr8	97724668	97730260	+	[]	['ENST00000336273.8']	ENST00000336273.8	3UTR	protein_coding	74	chr8	97724668	97730260	+	ENST00000336273.8	3UTR	protein_coding	74	chr8	97724668	97730260	+
Merged-chr8-109343556-1	chr8	109343519	109343593	+	0	{'ENST00000521662.5': '3UTR', 'ENST00000520147.5': 'exon', 'ENST00000521688.6': '3UTR'}	{'ENST00000521662.5': 'protein_coding', 'ENST00000520147.5': 'protein_coding', 'ENST00000521688.6': 'protein_coding'}	{'ENST00000521662.5': 74, 'ENST00000520147.5': 74, 'ENST00000521688.6': 74}	{'ENST00000521662.5': 'chr8', 'ENST00000520147.5': 'chr8', 'ENST00000521688.6': 'chr8'}	{'ENST00000521662.5': 109343479.0, 'ENST00000520147.5': 109343405.0, 'ENST00000521688.6': 109343479.0}	{'ENST00000521662.5': 109343664.0, 'ENST00000520147.5': 109343855.0, 'ENST00000521688.6': 109345954.0}	{'ENST00000521662.5': '+', 'ENST00000520147.5': '+', 'ENST00000521688.6': '+'}	ENST00000521662.5	3UTR	protein_coding	74	chr8	109343479	109343664	+	['ENST00000521662.5', 'ENST00000520147.5', 'ENST00000521688.6']	['ENST00000521688.6']	ENST00000521688.6	3UTR	protein_coding	74	chr8	109343479	109345954	+	[]	['ENST00000521662.5', 'ENST00000521688.6']	ENST00000521662.5	3UTR	protein_coding	74	chr8	109343479	109343664	+	ENST00000521688.6	3UTR	protein_coding	74	chr8	109343479	109345954	+
Merged-chr8-117919306-1	chr8	117919269	117919343	-	0	{'ENST00000378204.7': 'Intron'}	{'ENST00000378204.7': 'protein_coding'}	{'ENST00000378204.7': 74}	{'ENST00000378204.7': 'chr8'}	{'ENST00000378204.7': 117837201.0}	{'ENST00000378204.7': 118110084.0}	{'ENST00000378204.7': '-'}	ENST00000378204.7	Intron	protein_coding	74	chr8	117837201	118110084	-	['ENST00000378204.7']	['ENST00000378204.7']	ENST00000378204.7	Intron	protein_coding	74	chr8	117837201	118110084	-	[]	[]	ENST00000378204.7	Intron	protein_coding	74	chr8	117837201	118110084	-	ENST00000378204.7	Intron	protein_coding	74	chr8	117837201	118110084	-
Merged-chr8-132777919-1	chr8	132777882	132777956	+	0	{'ENST00000395379.5': 'exon', 'ENST00000622263.4': 'Intron'}	{'ENST00000395379.5': 'protein_coding', 'ENST00000622263.4': 'protein_coding'}	{'ENST00000395379.5': 29, 'ENST00000622263.4': 46}	{'ENST00000395379.5': 'chr8', 'ENST00000622263.4': 'chr8'}	{'ENST00000395379.5': 132777792.0, 'ENST00000622263.4': 132777911.0}	{'ENST00000395379.5': 132777911.0, 'ENST00000622263.4': 132794409.0}	{'ENST00000395379.5': '+', 'ENST00000622263.4': '+'}	ENST00000622263.4	Intron	protein_coding	46	chr8	132777911	132794409	+	['ENST00000395379.5', 'ENST00000622263.4']	[]	ENST00000622263.4	Intron	protein_coding	46	chr8	132777911	132794409	+	[]	[]	ENST00000622263.4	Intron	protein_coding	46	chr8	132777911	132794409	+	ENST00000622263.4	Intron	protein_coding	46	chr8	132777911	132794409	+
Merged-chr8-144102367-1	chr8	144102330	144102404	-	0	{'ENST00000398712.7': 'Intron'}	{'ENST00000398712.7': 'protein_coding'}	{'ENST00000398712.7': 74}	{'ENST00000398712.7': 'chr8'}	{'ENST00000398712.7': 144100069.0}	{'ENST00000398712.7': 144103050.0}	{'ENST00000398712.7': '-'}	ENST00000398712.7	Intron	protein_coding	74	chr8	144100069	144103050	-	['ENST00000398712.7']	['ENST00000398712.7']	ENST00000398712.7	Intron	protein_coding	74	chr8	144100069	144103050	-	[]	[]	ENST00000398712.7	Intron	protein_coding	74	chr8	144100069	144103050	-	ENST00000398712.7	Intron	protein_coding	74	chr8	144100069	144103050	-
Merged-chr8-144336449-1	chr8	144336412	144336486	-	0	{'ENST00000569446.3': '5UTR', 'ENST00000675888.1': 'Intron'}	{'ENST00000569446.3': 'protein_coding', 'ENST00000675888.1': 'protein_coding'}	{'ENST00000569446.3': 70, 'ENST00000675888.1': 74}	{'ENST00000569446.3': 'chr8', 'ENST00000675888.1': 'chr8'}	{'ENST00000569446.3': 144336170.0, 'ENST00000675888.1': 144334111.0}	{'ENST00000569446.3': 144336482.0, 'ENST00000675888.1': 144359183.0}	{'ENST00000569446.3': '-', 'ENST00000675888.1': '+'}	ENST00000675888.1	Intron	protein_coding	74	chr8	144334111	144359183	+	['ENST00000569446.3', 'ENST00000675888.1']	['ENST00000569446.3']	ENST00000569446.3	5UTR	protein_coding	70	chr8	144336170	144336482	-	['ENST00000569446.3']	[]	ENST00000569446.3	5UTR	protein_coding	70	chr8	144336170	144336482	-	ENST00000569446.3	5UTR	protein_coding	70	chr8	144336170	144336482	-
Merged-chr8-144361247-1	chr8	144361210	144361284	+	0	{'ENST00000675888.1': '3UTR', 'ENST00000532815.2': '3UTR', 'ENST00000530047.5': '3UTR', 'ENST00000329994.7': '3UTR', 'ENST00000526752.3': '3UTR'}	{'ENST00000675888.1': 'protein_coding', 'ENST00000532815.2': 'protein_coding', 'ENST00000530047.5': 'protein_coding', 'ENST00000329994.7': 'protein_coding', 'ENST00000526752.3': 'protein_coding'}	{'ENST00000675888.1': 42, 'ENST00000532815.2': 62, 'ENST00000530047.5': 60, 'ENST00000329994.7': 74, 'ENST00000526752.3': 62}	{'ENST00000675888.1': 'chr8', 'ENST00000532815.2': 'chr8', 'ENST00000530047.5': 'chr8', 'ENST00000329994.7': 'chr8', 'ENST00000526752.3': 'chr8'}	{'ENST00000675888.1': 144361013.0, 'ENST00000532815.2': 144361013.0, 'ENST00000530047.5': 144361013.0, 'ENST00000329994.7': 144361013.0, 'ENST00000526752.3': 144361006.0}	{'ENST00000675888.1': 144361252.0, 'ENST00000532815.2': 144361272.0, 'ENST00000530047.5': 144361270.0, 'ENST00000329994.7': 144361286.0, 'ENST00000526752.3': 144361272.0}	{'ENST00000675888.1': '+', 'ENST00000532815.2': '+', 'ENST00000530047.5': '+', 'ENST00000329994.7': '+', 'ENST00000526752.3': '+'}	ENST00000329994.7	3UTR	protein_coding	74	chr8	144361013	144361286	+	['ENST00000675888.1', 'ENST00000532815.2', 'ENST00000530047.5', 'ENST00000329994.7', 'ENST00000526752.3']	[]	ENST00000329994.7	3UTR	protein_coding	74	chr8	144361013	144361286	+	[]	['ENST00000675888.1', 'ENST00000532815.2', 'ENST00000530047.5', 'ENST00000329994.7', 'ENST00000526752.3']	ENST00000329994.7	3UTR	protein_coding	74	chr8	144361013	144361286	+	ENST00000329994.7	3UTR	protein_coding	74	chr8	144361013	144361286	+
Merged-chr8-19948207-1	chr8	19948170	19948244	+	0	{'ENST00000650287.1': 'Intron'}	{'ENST00000650287.1': 'protein_coding'}	{'ENST00000650287.1': 9}	{'ENST00000650287.1': 'chr8'}	{'ENST00000650287.1': 19939528.0}	{'ENST00000650287.1': 19948179.0}	{'ENST00000650287.1': '+'}	ENST00000650287.1	Intron	protein_coding	9	chr8	19939528	19948179	+	['ENST00000650287.1']	['ENST00000650287.1']	ENST00000650287.1	Intron	protein_coding	9	chr8	19939528	19948179	+	[]	[]	ENST00000650287.1	Intron	protein_coding	9	chr8	19939528	19948179	+	ENST00000650287.1	Intron	protein_coding	9	chr8	19939528	19948179	+
Merged-chr8-28570352-1	chr8	28570315	28570389	+	0	{'ENST00000537916.2': '3UTR', 'ENST00000240093.8': '3UTR'}	{'ENST00000537916.2': 'protein_coding', 'ENST00000240093.8': 'protein_coding'}	{'ENST00000537916.2': 74, 'ENST00000240093.8': 74}	{'ENST00000537916.2': 'chr8', 'ENST00000240093.8': 'chr8'}	{'ENST00000537916.2': 28563009.0, 'ENST00000240093.8': 28563009.0}	{'ENST00000537916.2': 28574267.0, 'ENST00000240093.8': 28574258.0}	{'ENST00000537916.2': '+', 'ENST00000240093.8': '+'}	ENST00000537916.2	3UTR	protein_coding	74	chr8	28563009	28574267	+	['ENST00000537916.2', 'ENST00000240093.8']	['ENST00000240093.8']	ENST00000240093.8	3UTR	protein_coding	74	chr8	28563009	28574258	+	[]	['ENST00000537916.2', 'ENST00000240093.8']	ENST00000537916.2	3UTR	protein_coding	74	chr8	28563009	28574267	+	ENST00000240093.8	3UTR	protein_coding	74	chr8	28563009	28574258	+
Merged-chr8-30995795-1	chr8	30995758	30995832	-	0	{'ENST00000339382.3': '3UTR'}	{'ENST00000339382.3': 'protein_coding'}	{'ENST00000339382.3': 31}	{'ENST00000339382.3': 'chr8'}	{'ENST00000339382.3': 30995802.0}	{'ENST00000339382.3': 30996595.0}	{'ENST00000339382.3': '-'}	ENST00000339382.3	3UTR	protein_coding	31	chr8	30995802	30996595	-	['ENST00000339382.3']	[]	ENST00000339382.3	3UTR	protein_coding	31	chr8	30995802	30996595	-	[]	['ENST00000339382.3']	ENST00000339382.3	3UTR	protein_coding	31	chr8	30995802	30996595	-	ENST00000339382.3	3UTR	protein_coding	31	chr8	30995802	30996595	-
Merged-chr8-37756385-1	chr8	37756348	37756422	+	0	{'ENST00000519638.3': '3UTR'}	{'ENST00000519638.3': 'protein_coding'}	{'ENST00000519638.3': 74}	{'ENST00000519638.3': 'chr8'}	{'ENST00000519638.3': 37754113.0}	{'ENST00000519638.3': 37758422.0}	{'ENST00000519638.3': '+'}	ENST00000519638.3	3UTR	protein_coding	74	chr8	37754113	37758422	+	['ENST00000519638.3']	['ENST00000519638.3']	ENST00000519638.3	3UTR	protein_coding	74	chr8	37754113	37758422	+	[]	['ENST00000519638.3']	ENST00000519638.3	3UTR	protein_coding	74	chr8	37754113	37758422	+	ENST00000519638.3	3UTR	protein_coding	74	chr8	37754113	37758422	+
Merged-chr8-38468400-1	chr8	38468363	38468437	-	0	{'ENST00000397091.9': 'exon', 'ENST00000703405.1': 'exon', 'ENST00000341462.9': 'exon', 'ENST00000447712.7': 'exon', 'ENST00000532791.5': 'exon', 'ENST00000356207.9': 'exon', 'ENST00000335922.9': 'exon', 'ENST00000683815.1': 'exon'}	{'ENST00000397091.9': 'protein_coding', 'ENST00000703405.1': 'protein_coding', 'ENST00000341462.9': 'protein_coding', 'ENST00000447712.7': 'protein_coding', 'ENST00000532791.5': 'protein_coding', 'ENST00000356207.9': 'protein_coding', 'ENST00000335922.9': 'protein_coding', 'ENST00000683815.1': 'protein_coding'}	{'ENST00000397091.9': 74, 'ENST00000703405.1': 74, 'ENST00000341462.9': 74, 'ENST00000447712.7': 74, 'ENST00000532791.5': 74, 'ENST00000356207.9': 74, 'ENST00000335922.9': 74, 'ENST00000683815.1': 74}	{'ENST00000397091.9': 'chr8', 'ENST00000703405.1': 'chr8', 'ENST00000341462.9': 'chr8', 'ENST00000447712.7': 'chr8', 'ENST00000532791.5': 'chr8', 'ENST00000356207.9': 'chr8', 'ENST00000335922.9': 'chr8', 'ENST00000683815.1': 'chr8'}	{'ENST00000397091.9': 38467981.0, 'ENST00000703405.1': 38467981.0, 'ENST00000341462.9': 38467981.0, 'ENST00000447712.7': 38467981.0, 'ENST00000532791.5': 38467981.0, 'ENST00000356207.9': 38467981.0, 'ENST00000335922.9': 38467981.0, 'ENST00000683815.1': 38467981.0}	{'ENST00000397091.9': 38468641.0, 'ENST00000703405.1': 38468834.0, 'ENST00000341462.9': 38468601.0, 'ENST00000447712.7': 38468635.0, 'ENST00000532791.5': 38468622.0, 'ENST00000356207.9': 38468616.0, 'ENST00000335922.9': 38468621.0, 'ENST00000683815.1': 38468633.0}	{'ENST00000397091.9': '-', 'ENST00000703405.1': '-', 'ENST00000341462.9': '-', 'ENST00000447712.7': '-', 'ENST00000532791.5': '-', 'ENST00000356207.9': '-', 'ENST00000335922.9': '-', 'ENST00000683815.1': '-'}	ENST00000397091.9	exon	protein_coding	74	chr8	38467981	38468641	-	['ENST00000397091.9', 'ENST00000703405.1', 'ENST00000341462.9', 'ENST00000447712.7', 'ENST00000532791.5', 'ENST00000356207.9', 'ENST00000335922.9', 'ENST00000683815.1']	['ENST00000447712.7']	ENST00000447712.7	exon	protein_coding	74	chr8	38467981	38468635	-	[]	[]	ENST00000447712.7	exon	protein_coding	74	chr8	38467981	38468635	-	ENST00000447712.7	exon	protein_coding	74	chr8	38467981	38468635	-
Merged-chr8-41621875-1	chr8	41621838	41621912	+	0	{'ENST00000396987.7': '3UTR'}	{'ENST00000396987.7': 'protein_coding'}	{'ENST00000396987.7': 74}	{'ENST00000396987.7': 'chr8'}	{'ENST00000396987.7': 41620999.0}	{'ENST00000396987.7': 41625001.0}	{'ENST00000396987.7': '+'}	ENST00000396987.7	3UTR	protein_coding	74	chr8	41620999	41625001	+	['ENST00000396987.7']	['ENST00000396987.7']	ENST00000396987.7	3UTR	protein_coding	74	chr8	41620999	41625001	+	[]	['ENST00000396987.7']	ENST00000396987.7	3UTR	protein_coding	74	chr8	41620999	41625001	+	ENST00000396987.7	3UTR	protein_coding	74	chr8	41620999	41625001	+
Merged-chr8-63168805-1	chr8	63168768	63168842	+	0	{'ENST00000617200.1': 'exon', 'ENST00000539294.6': '5UTR', 'ENST00000621957.4': '5UTR', 'ENST00000517371.5': '5UTR', 'ENST00000621413.4': 'exon'}	{'ENST00000617200.1': 'protein_coding', 'ENST00000539294.6': 'protein_coding', 'ENST00000621957.4': 'protein_coding', 'ENST00000517371.5': 'protein_coding', 'ENST00000621413.4': 'protein_coding'}	{'ENST00000617200.1': 74, 'ENST00000539294.6': 74, 'ENST00000621957.4': 74, 'ENST00000517371.5': 74, 'ENST00000621413.4': 74}	{'ENST00000617200.1': 'chr8', 'ENST00000539294.6': 'chr8', 'ENST00000621957.4': 'chr8', 'ENST00000517371.5': 'chr8', 'ENST00000621413.4': 'chr8'}	{'ENST00000617200.1': 63168553.0, 'ENST00000539294.6': 63168621.0, 'ENST00000621957.4': 63168652.0, 'ENST00000517371.5': 63168654.0, 'ENST00000621413.4': 63168661.0}	{'ENST00000617200.1': 63168901.0, 'ENST00000539294.6': 63168877.0, 'ENST00000621957.4': 63168877.0, 'ENST00000517371.5': 63168877.0, 'ENST00000621413.4': 63168901.0}	{'ENST00000617200.1': '+', 'ENST00000539294.6': '+', 'ENST00000621957.4': '+', 'ENST00000517371.5': '+', 'ENST00000621413.4': '+'}	ENST00000621413.4	exon	protein_coding	74	chr8	63168661	63168901	+	['ENST00000617200.1', 'ENST00000539294.6', 'ENST00000621957.4', 'ENST00000517371.5', 'ENST00000621413.4']	['ENST00000539294.6']	ENST00000539294.6	5UTR	protein_coding	74	chr8	63168621	63168877	+	['ENST00000539294.6', 'ENST00000621957.4', 'ENST00000517371.5']	[]	ENST00000539294.6	5UTR	protein_coding	74	chr8	63168621	63168877	+	ENST00000539294.6	5UTR	protein_coding	74	chr8	63168621	63168877	+
Merged-chr8-69659978-1	chr8	69659941	69660015	+	0	{'ENST00000260128.8': '3UTR', 'ENST00000458141.6': '3UTR', 'ENST00000419716.7': '3UTR'}	{'ENST00000260128.8': 'protein_coding', 'ENST00000458141.6': 'protein_coding', 'ENST00000419716.7': 'protein_coding'}	{'ENST00000260128.8': 74, 'ENST00000458141.6': 74, 'ENST00000419716.7': 74}	{'ENST00000260128.8': 'chr8', 'ENST00000458141.6': 'chr8', 'ENST00000419716.7': 'chr8'}	{'ENST00000260128.8': 69658533.0, 'ENST00000458141.6': 69658533.0, 'ENST00000419716.7': 69658533.0}	{'ENST00000260128.8': 69660912.0, 'ENST00000458141.6': 69660915.0, 'ENST00000419716.7': 69660055.0}	{'ENST00000260128.8': '+', 'ENST00000458141.6': '+', 'ENST00000419716.7': '+'}	ENST00000260128.8	3UTR	protein_coding	74	chr8	69658533	69660912	+	['ENST00000260128.8', 'ENST00000458141.6', 'ENST00000419716.7']	[]	ENST00000260128.8	3UTR	protein_coding	74	chr8	69658533	69660912	+	[]	['ENST00000260128.8', 'ENST00000458141.6', 'ENST00000419716.7']	ENST00000260128.8	3UTR	protein_coding	74	chr8	69658533	69660912	+	ENST00000260128.8	3UTR	protein_coding	74	chr8	69658533	69660912	+
Merged-chr8-93999358-1	chr8	93999321	93999395	+	0	{'Intergenic': 'Unlabeled'}	{'Intergenic': 'Intergenic'}	{'Intergenic': 0}	{'Intergenic': nan}	{'Intergenic': nan}	{'Intergenic': nan}	{'Intergenic': '+'}	Intergenic	Unlabeled	Intergenic	0				+	['Intergenic']	[]	Intergenic	Unlabeled	Intergenic	0				+	[]	[]	Intergenic	Unlabeled	Intergenic	0				+	Intergenic	Unlabeled	Intergenic	0				+
Merged-chr8-96231765-1	chr8	96231728	96231802	-	0	{'ENST00000287022.10': 'Intron', 'ENST00000517523.1': 'Intron', 'ENST00000518406.5': 'Intron'}	{'ENST00000287022.10': 'protein_coding', 'ENST00000517523.1': 'protein_coding', 'ENST00000518406.5': 'protein_coding'}	{'ENST00000287022.10': 45, 'ENST00000517523.1': 45, 'ENST00000518406.5': 45}	{'ENST00000287022.10': 'chr8', 'ENST00000517523.1': 'chr8', 'ENST00000518406.5': 'chr8'}	{'ENST00000287022.10': 96231132.0, 'ENST00000517523.1': 96231621.0, 'ENST00000518406.5': 96231515.0}	{'ENST00000287022.10': 96231773.0, 'ENST00000517523.1': 96231773.0, 'ENST00000518406.5': 96231773.0}	{'ENST00000287022.10': '-', 'ENST00000517523.1': '-', 'ENST00000518406.5': '-'}	ENST00000517523.1	Intron	protein_coding	45	chr8	96231621	96231773	-	['ENST00000287022.10', 'ENST00000517523.1', 'ENST00000518406.5']	['ENST00000287022.10']	ENST00000287022.10	Intron	protein_coding	45	chr8	96231132	96231773	-	[]	[]	ENST00000287022.10	Intron	protein_coding	45	chr8	96231132	96231773	-	ENST00000287022.10	Intron	protein_coding	45	chr8	96231132	96231773	-
Merged-chr8-100153992-1	chr8	100153955	100154029	+	0	{'ENST00000353107.8': '3UTR'}	{'ENST00000353107.8': 'protein_coding'}	{'ENST00000353107.8': 48}	{'ENST00000353107.8': 'chr8'}	{'ENST00000353107.8': 100153314.0}	{'ENST00000353107.8': 100154003.0}	{'ENST00000353107.8': '+'}	ENST00000353107.8	3UTR	protein_coding	48	chr8	100153314	100154003	+	['ENST00000353107.8']	['ENST00000353107.8']	ENST00000353107.8	3UTR	protein_coding	48	chr8	100153314	100154003	+	[]	['ENST00000353107.8']	ENST00000353107.8	3UTR	protein_coding	48	chr8	100153314	100154003	+	ENST00000353107.8	3UTR	protein_coding	48	chr8	100153314	100154003	+
Merged-chr8-107497638-1	chr8	107497601	107497675	-	0	{'ENST00000517746.6': '5UTR'}	{'ENST00000517746.6': 'protein_coding'}	{'ENST00000517746.6': 74}	{'ENST00000517746.6': 'chr8'}	{'ENST00000517746.6': 107497559.0}	{'ENST00000517746.6': 107497918.0}	{'ENST00000517746.6': '-'}	ENST00000517746.6	5UTR	protein_coding	74	chr8	107497559	107497918	-	['ENST00000517746.6']	['ENST00000517746.6']	ENST00000517746.6	5UTR	protein_coding	74	chr8	107497559	107497918	-	['ENST00000517746.6']	[]	ENST00000517746.6	5UTR	protein_coding	74	chr8	107497559	107497918	-	ENST00000517746.6	5UTR	protein_coding	74	chr8	107497559	107497918	-
Merged-chr8-116851913-1	chr8	116851876	116851950	-	0	{'ENST00000687358.1': 'Intron'}	{'ENST00000687358.1': 'protein_coding'}	{'ENST00000687358.1': 71}	{'ENST00000687358.1': 'chr8'}	{'ENST00000687358.1': 116850767.0}	{'ENST00000687358.1': 116851947.0}	{'ENST00000687358.1': '-'}	ENST00000687358.1	Intron	protein_coding	71	chr8	116850767	116851947	-	['ENST00000687358.1']	[]	ENST00000687358.1	Intron	protein_coding	71	chr8	116850767	116851947	-	[]	[]	ENST00000687358.1	Intron	protein_coding	71	chr8	116850767	116851947	-	ENST00000687358.1	Intron	protein_coding	71	chr8	116850767	116851947	-
Merged-chr8-119732050-1	chr8	119732013	119732087	-	0	{'ENST00000378164.7': 'CDS', 'ENST00000523904.2': 'exon', 'ENST00000686879.1': 'exon', 'ENST00000685235.1': 'exon', 'ENST00000690144.1': '3UTR'}	{'ENST00000378164.7': 'protein_coding', 'ENST00000523904.2': 'protein_coding', 'ENST00000686879.1': 'protein_coding', 'ENST00000685235.1': 'protein_coding', 'ENST00000690144.1': 'protein_coding'}	{'ENST00000378164.7': 74, 'ENST00000523904.2': 74, 'ENST00000686879.1': 74, 'ENST00000685235.1': 74, 'ENST00000690144.1': 74}	{'ENST00000378164.7': 'chr8', 'ENST00000523904.2': 'chr8', 'ENST00000686879.1': 'chr8', 'ENST00000685235.1': 'chr8', 'ENST00000690144.1': 'chr8'}	{'ENST00000378164.7': 119731927.0, 'ENST00000523904.2': 119730793.0, 'ENST00000686879.1': 119730955.0, 'ENST00000685235.1': 119730969.0, 'ENST00000690144.1': 119731052.0}	{'ENST00000378164.7': 119732186.0, 'ENST00000523904.2': 119732186.0, 'ENST00000686879.1': 119732186.0, 'ENST00000685235.1': 119732186.0, 'ENST00000690144.1': 119732657.0}	{'ENST00000378164.7': '-', 'ENST00000523904.2': '-', 'ENST00000686879.1': '-', 'ENST00000685235.1': '-', 'ENST00000690144.1': '-'}	ENST00000378164.7	CDS	protein_coding	74	chr8	119731927	119732186	-	['ENST00000378164.7', 'ENST00000523904.2', 'ENST00000686879.1', 'ENST00000685235.1', 'ENST00000690144.1']	['ENST00000378164.7']	ENST00000378164.7	CDS	protein_coding	74	chr8	119731927	119732186	-	[]	['ENST00000690144.1']	ENST00000690144.1	3UTR	protein_coding	74	chr8	119731052	119732657	-	ENST00000378164.7	CDS	protein_coding	74	chr8	119731927	119732186	-
Merged-chr8-123128526-1	chr8	123128489	123128563	+	0	{'ENST00000287380.6': 'Intron', 'ENST00000518805.5': 'Intron'}	{'ENST00000287380.6': 'protein_coding', 'ENST00000518805.5': 'protein_coding'}	{'ENST00000287380.6': 51, 'ENST00000518805.5': 74}	{'ENST00000287380.6': 'chr8', 'ENST00000518805.5': 'chr8'}	{'ENST00000287380.6': 123128513.0, 'ENST00000518805.5': 123126687.0}	{'ENST00000287380.6': 123129065.0, 'ENST00000518805.5': 123129069.0}	{'ENST00000287380.6': '+', 'ENST00000518805.5': '+'}	ENST00000518805.5	Intron	protein_coding	74	chr8	123126687	123129069	+	['ENST00000287380.6', 'ENST00000518805.5']	['ENST00000287380.6']	ENST00000287380.6	Intron	protein_coding	51	chr8	123128513	123129065	+	[]	[]	ENST00000287380.6	Intron	protein_coding	51	chr8	123128513	123129065	+	ENST00000287380.6	Intron	protein_coding	51	chr8	123128513	123129065	+
Merged-chr8-132775547-1	chr8	132775510	132775584	+	0	{'ENST00000622263.4': 'exon', 'ENST00000395379.5': 'exon', 'ENST00000395386.7': 'exon', 'ENST00000485595.5': 'exon', 'ENST00000337920.8': 'exon', 'ENST00000395376.5': 'exon'}	{'ENST00000622263.4': 'protein_coding', 'ENST00000395379.5': 'protein_coding', 'ENST00000395386.7': 'protein_coding', 'ENST00000485595.5': 'protein_coding', 'ENST00000337920.8': 'protein_coding', 'ENST00000395376.5': 'protein_coding'}	{'ENST00000622263.4': 74, 'ENST00000395379.5': 74, 'ENST00000395386.7': 74, 'ENST00000485595.5': 74, 'ENST00000337920.8': 74, 'ENST00000395376.5': 5}	{'ENST00000622263.4': 'chr8', 'ENST00000395379.5': 'chr8', 'ENST00000395386.7': 'chr8', 'ENST00000485595.5': 'chr8', 'ENST00000337920.8': 'chr8', 'ENST00000395376.5': 'chr8'}	{'ENST00000622263.4': 132775358.0, 'ENST00000395379.5': 132775375.0, 'ENST00000395386.7': 132775388.0, 'ENST00000485595.5': 132775398.0, 'ENST00000337920.8': 132775408.0, 'ENST00000395376.5': 132775580.0}	{'ENST00000622263.4': 132775645.0, 'ENST00000395379.5': 132775645.0, 'ENST00000395386.7': 132775645.0, 'ENST00000485595.5': 132775645.0, 'ENST00000337920.8': 132775645.0, 'ENST00000395376.5': 132775645.0}	{'ENST00000622263.4': '+', 'ENST00000395379.5': '+', 'ENST00000395386.7': '+', 'ENST00000485595.5': '+', 'ENST00000337920.8': '+', 'ENST00000395376.5': '+'}	ENST00000337920.8	exon	protein_coding	74	chr8	132775408	132775645	+	['ENST00000622263.4', 'ENST00000395379.5', 'ENST00000395386.7', 'ENST00000485595.5', 'ENST00000337920.8', 'ENST00000395376.5']	['ENST00000395386.7']	ENST00000395386.7	exon	protein_coding	74	chr8	132775388	132775645	+	[]	[]	ENST00000395386.7	exon	protein_coding	74	chr8	132775388	132775645	+	ENST00000395386.7	exon	protein_coding	74	chr8	132775388	132775645	+
Merged-chr8-144080660-1	chr8	144080623	144080697	+	0	{'ENST00000316052.6': '3UTR', 'ENST00000703646.1': 'Intron'}	{'ENST00000316052.6': 'protein_coding', 'ENST00000703646.1': 'protein_coding'}	{'ENST00000316052.6': 25, 'ENST00000703646.1': 74}	{'ENST00000316052.6': 'chr8', 'ENST00000703646.1': 'chr8'}	{'ENST00000316052.6': 144080599.0, 'ENST00000703646.1': 144080568.0}	{'ENST00000316052.6': 144080648.0, 'ENST00000703646.1': 144083123.0}	{'ENST00000316052.6': '+', 'ENST00000703646.1': '+'}	ENST00000703646.1	Intron	protein_coding	74	chr8	144080568	144083123	+	['ENST00000316052.6', 'ENST00000703646.1']	['ENST00000316052.6']	ENST00000316052.6	3UTR	protein_coding	25	chr8	144080599	144080648	+	[]	['ENST00000316052.6']	ENST00000316052.6	3UTR	protein_coding	25	chr8	144080599	144080648	+	ENST00000316052.6	3UTR	protein_coding	25	chr8	144080599	144080648	+
Merged-chr8-15540566-1	chr8	15540529	15540603	+	0	{'ENST00000506802.5': 'exon', 'ENST00000503731.6': 'exon', 'ENST00000510836.5': 'exon', 'ENST00000509380.5': 'exon', 'ENST00000382020.8': 'Intron'}	{'ENST00000506802.5': 'protein_coding', 'ENST00000503731.6': 'protein_coding', 'ENST00000510836.5': 'protein_coding', 'ENST00000509380.5': 'protein_coding', 'ENST00000382020.8': 'protein_coding'}	{'ENST00000506802.5': 39, 'ENST00000503731.6': 39, 'ENST00000510836.5': 39, 'ENST00000509380.5': 39, 'ENST00000382020.8': 36}	{'ENST00000506802.5': 'chr8', 'ENST00000503731.6': 'chr8', 'ENST00000510836.5': 'chr8', 'ENST00000509380.5': 'chr8', 'ENST00000382020.8': 'chr8'}	{'ENST00000506802.5': 15540233.0, 'ENST00000503731.6': 15540263.0, 'ENST00000510836.5': 15540279.0, 'ENST00000509380.5': 15540281.0, 'ENST00000382020.8': 15540568.0}	{'ENST00000506802.5': 15540568.0, 'ENST00000503731.6': 15540568.0, 'ENST00000510836.5': 15540568.0, 'ENST00000509380.5': 15540568.0, 'ENST00000382020.8': 15623079.0}	{'ENST00000506802.5': '+', 'ENST00000503731.6': '+', 'ENST00000510836.5': '+', 'ENST00000509380.5': '+', 'ENST00000382020.8': '+'}	ENST00000509380.5	exon	protein_coding	39	chr8	15540281	15540568	+	['ENST00000506802.5', 'ENST00000503731.6', 'ENST00000510836.5', 'ENST00000509380.5', 'ENST00000382020.8']	['ENST00000503731.6']	ENST00000503731.6	exon	protein_coding	39	chr8	15540263	15540568	+	[]	[]	ENST00000503731.6	exon	protein_coding	39	chr8	15540263	15540568	+	ENST00000503731.6	exon	protein_coding	39	chr8	15540263	15540568	+
Merged-chr8-17246675-1	chr8	17246638	17246712	-	0	{'ENST00000523917.5': 'exon', 'ENST00000628418.1': 'exon', 'ENST00000361272.9': 'Intron'}	{'ENST00000523917.5': 'protein_coding', 'ENST00000628418.1': 'protein_coding', 'ENST00000361272.9': 'protein_coding'}	{'ENST00000523917.5': 38, 'ENST00000628418.1': 38, 'ENST00000361272.9': 36}	{'ENST00000523917.5': 'chr8', 'ENST00000628418.1': 'chr8', 'ENST00000361272.9': 'chr8'}	{'ENST00000523917.5': 17246675.0, 'ENST00000628418.1': 17246675.0, 'ENST00000361272.9': 17245247.0}	{'ENST00000523917.5': 17246878.0, 'ENST00000628418.1': 17246855.0, 'ENST00000361272.9': 17246674.0}	{'ENST00000523917.5': '-', 'ENST00000628418.1': '-', 'ENST00000361272.9': '-'}	ENST00000523917.5	exon	protein_coding	38	chr8	17246675	17246878	-	['ENST00000523917.5', 'ENST00000628418.1', 'ENST00000361272.9']	['ENST00000361272.9']	ENST00000361272.9	Intron	protein_coding	36	chr8	17245247	17246674	-	[]	[]	ENST00000361272.9	Intron	protein_coding	36	chr8	17245247	17246674	-	ENST00000361272.9	Intron	protein_coding	36	chr8	17245247	17246674	-
Merged-chr8-17247363-1	chr8	17247326	17247400	+	0	{'ENST00000521005.1': 'Intron', 'ENST00000324849.9': 'Intron', 'ENST00000521829.5': 'Intron'}	{'ENST00000521005.1': 'protein_coding', 'ENST00000324849.9': 'protein_coding', 'ENST00000521829.5': 'protein_coding'}	{'ENST00000521005.1': 32, 'ENST00000324849.9': 32, 'ENST00000521829.5': 32}	{'ENST00000521005.1': 'chr8', 'ENST00000324849.9': 'chr8', 'ENST00000521829.5': 'chr8'}	{'ENST00000521005.1': 17247369.0, 'ENST00000324849.9': 17247369.0, 'ENST00000521829.5': 17247369.0}	{'ENST00000521005.1': 17247654.0, 'ENST00000324849.9': 17265906.0, 'ENST00000521829.5': 17268257.0}	{'ENST00000521005.1': '+', 'ENST00000324849.9': '+', 'ENST00000521829.5': '+'}	ENST00000521005.1	Intron	protein_coding	32	chr8	17247369	17247654	+	['ENST00000521005.1', 'ENST00000324849.9', 'ENST00000521829.5']	['ENST00000324849.9']	ENST00000324849.9	Intron	protein_coding	32	chr8	17247369	17265906	+	[]	[]	ENST00000324849.9	Intron	protein_coding	32	chr8	17247369	17265906	+	ENST00000324849.9	Intron	protein_coding	32	chr8	17247369	17265906	+
Merged-chr8-17937180-1	chr8	17937143	17937217	+	0	{'ENST00000522275.6': 'exon'}	{'ENST00000522275.6': 'protein_coding'}	{'ENST00000522275.6': 74}	{'ENST00000522275.6': 'chr8'}	{'ENST00000522275.6': 17937134.0}	{'ENST00000522275.6': 17937379.0}	{'ENST00000522275.6': '+'}	ENST00000522275.6	exon	protein_coding	74	chr8	17937134	17937379	+	['ENST00000522275.6']	[]	ENST00000522275.6	exon	protein_coding	74	chr8	17937134	17937379	+	[]	[]	ENST00000522275.6	exon	protein_coding	74	chr8	17937134	17937379	+	ENST00000522275.6	exon	protein_coding	74	chr8	17937134	17937379	+
Merged-chr8-18027756-1	chr8	18027719	18027793	+	0	{'ENST00000522275.6': '3UTR', 'ENST00000325083.13': '3UTR', 'ENST00000519253.5': '3UTR', 'ENST00000524226.5': '3UTR'}	{'ENST00000522275.6': 'protein_coding', 'ENST00000325083.13': 'protein_coding', 'ENST00000519253.5': 'protein_coding', 'ENST00000524226.5': 'protein_coding'}	{'ENST00000522275.6': 28, 'ENST00000325083.13': 74, 'ENST00000519253.5': 74, 'ENST00000524226.5': 74}	{'ENST00000522275.6': 'chr8', 'ENST00000325083.13': 'chr8', 'ENST00000519253.5': 'chr8', 'ENST00000524226.5': 'chr8'}	{'ENST00000522275.6': 18027660.0, 'ENST00000325083.13': 18027660.0, 'ENST00000519253.5': 18027660.0, 'ENST00000524226.5': 18027660.0}	{'ENST00000522275.6': 18027747.0, 'ENST00000325083.13': 18029948.0, 'ENST00000519253.5': 18027803.0, 'ENST00000524226.5': 18027975.0}	{'ENST00000522275.6': '+', 'ENST00000325083.13': '+', 'ENST00000519253.5': '+', 'ENST00000524226.5': '+'}	ENST00000325083.13	3UTR	protein_coding	74	chr8	18027660	18029948	+	['ENST00000522275.6', 'ENST00000325083.13', 'ENST00000519253.5', 'ENST00000524226.5']	['ENST00000325083.13']	ENST00000325083.13	3UTR	protein_coding	74	chr8	18027660	18029948	+	[]	['ENST00000522275.6', 'ENST00000325083.13', 'ENST00000519253.5', 'ENST00000524226.5']	ENST00000325083.13	3UTR	protein_coding	74	chr8	18027660	18029948	+	ENST00000325083.13	3UTR	protein_coding	74	chr8	18027660	18029948	+
Merged-chr8-41510983-1	chr8	41510946	41511020	+	0	{'ENST00000694872.1': 'exon', 'ENST00000687203.1': 'exon', 'ENST00000518270.6': 'exon', 'ENST00000405786.3': 'exon', 'ENST00000694908.1': 'exon', 'ENST00000694863.1': 'exon', 'ENST00000694886.1': 'exon', 'ENST00000523081.2': 'exon'}	{'ENST00000694872.1': 'protein_coding', 'ENST00000687203.1': 'protein_coding', 'ENST00000518270.6': 'protein_coding', 'ENST00000405786.3': 'protein_coding', 'ENST00000694908.1': 'protein_coding', 'ENST00000694863.1': 'protein_coding', 'ENST00000694886.1': 'protein_coding', 'ENST00000523081.2': 'lncRNA'}	{'ENST00000694872.1': 19, 'ENST00000687203.1': 74, 'ENST00000518270.6': 28, 'ENST00000405786.3': 34, 'ENST00000694908.1': 11, 'ENST00000694863.1': 1, 'ENST00000694886.1': 8, 'ENST00000523081.2': 74}	{'ENST00000694872.1': 'chr8', 'ENST00000687203.1': 'chr8', 'ENST00000518270.6': 'chr8', 'ENST00000405786.3': 'chr8', 'ENST00000694908.1': 'chr8', 'ENST00000694863.1': 'chr8', 'ENST00000694886.1': 'chr8', 'ENST00000523081.2': 'chr8'}	{'ENST00000694872.1': 41509584.0, 'ENST00000687203.1': 41509584.0, 'ENST00000518270.6': 41509584.0, 'ENST00000405786.3': 41509584.0, 'ENST00000694908.1': 41509584.0, 'ENST00000694863.1': 41509584.0, 'ENST00000694886.1': 41509584.0, 'ENST00000523081.2': 41509593.0}	{'ENST00000694872.1': 41510965.0, 'ENST00000687203.1': 41511095.0, 'ENST00000518270.6': 41510974.0, 'ENST00000405786.3': 41510980.0, 'ENST00000694908.1': 41510957.0, 'ENST00000694863.1': 41510947.0, 'ENST00000694886.1': 41510954.0, 'ENST00000523081.2': 41512545.0}	{'ENST00000694872.1': '+', 'ENST00000687203.1': '+', 'ENST00000518270.6': '+', 'ENST00000405786.3': '+', 'ENST00000694908.1': '+', 'ENST00000694863.1': '+', 'ENST00000694886.1': '+', 'ENST00000523081.2': '-'}	ENST00000523081.2	exon	lncRNA	74	chr8	41509593	41512545	-	['ENST00000694872.1', 'ENST00000687203.1', 'ENST00000518270.6', 'ENST00000405786.3', 'ENST00000694908.1', 'ENST00000694863.1', 'ENST00000694886.1', 'ENST00000523081.2']	[]	ENST00000523081.2	exon	lncRNA	74	chr8	41509593	41512545	-	[]	[]	ENST00000523081.2	exon	lncRNA	74	chr8	41509593	41512545	-	ENST00000523081.2	exon	lncRNA	74	chr8	41509593	41512545	-
Merged-chr8-60584823-1	chr8	60584786	60584860	+	0	{'ENST00000531289.5': 'Intron', 'ENST00000529579.5': 'Intron'}	{'ENST00000531289.5': 'protein_coding', 'ENST00000529579.5': 'protein_coding'}	{'ENST00000531289.5': 46, 'ENST00000529579.5': 46}	{'ENST00000531289.5': 'chr8', 'ENST00000529579.5': 'chr8'}	{'ENST00000531289.5': 60584815.0, 'ENST00000529579.5': 60584815.0}	{'ENST00000531289.5': 60591857.0, 'ENST00000529579.5': 60618579.0}	{'ENST00000531289.5': '+', 'ENST00000529579.5': '+'}	ENST00000531289.5	Intron	protein_coding	46	chr8	60584815	60591857	+	['ENST00000531289.5', 'ENST00000529579.5']	[]	ENST00000531289.5	Intron	protein_coding	46	chr8	60584815	60591857	+	[]	[]	ENST00000531289.5	Intron	protein_coding	46	chr8	60584815	60591857	+	ENST00000531289.5	Intron	protein_coding	46	chr8	60584815	60591857	+
Merged-chr8-61714272-1	chr8	61714235	61714309	-	0	{'ENST00000356457.9': 'exon', 'ENST00000445642.6': 'exon', 'ENST00000519234.5': 'exon', 'ENST00000518068.5': 'exon', 'ENST00000517856.5': 'exon', 'ENST00000379454.9': 'Intron'}	{'ENST00000356457.9': 'protein_coding', 'ENST00000445642.6': 'protein_coding', 'ENST00000519234.5': 'protein_coding', 'ENST00000518068.5': 'protein_coding', 'ENST00000517856.5': 'protein_coding', 'ENST00000379454.9': 'protein_coding'}	{'ENST00000356457.9': 41, 'ENST00000445642.6': 41, 'ENST00000519234.5': 41, 'ENST00000518068.5': 41, 'ENST00000517856.5': 41, 'ENST00000379454.9': 33}	{'ENST00000356457.9': 'chr8', 'ENST00000445642.6': 'chr8', 'ENST00000519234.5': 'chr8', 'ENST00000518068.5': 'chr8', 'ENST00000517856.5': 'chr8', 'ENST00000379454.9': 'chr8'}	{'ENST00000356457.9': 61714269.0, 'ENST00000445642.6': 61714269.0, 'ENST00000519234.5': 61714269.0, 'ENST00000518068.5': 61714269.0, 'ENST00000517856.5': 61714269.0, 'ENST00000379454.9': 61684188.0}	{'ENST00000356457.9': 61714596.0, 'ENST00000445642.6': 61714640.0, 'ENST00000519234.5': 61714525.0, 'ENST00000518068.5': 61714568.0, 'ENST00000517856.5': 61714587.0, 'ENST00000379454.9': 61714268.0}	{'ENST00000356457.9': '-', 'ENST00000445642.6': '-', 'ENST00000519234.5': '-', 'ENST00000518068.5': '-', 'ENST00000517856.5': '-', 'ENST00000379454.9': '-'}	ENST00000356457.9	exon	protein_coding	41	chr8	61714269	61714596	-	['ENST00000356457.9', 'ENST00000445642.6', 'ENST00000519234.5', 'ENST00000518068.5', 'ENST00000517856.5', 'ENST00000379454.9']	['ENST00000379454.9']	ENST00000379454.9	Intron	protein_coding	33	chr8	61684188	61714268	-	[]	[]	ENST00000379454.9	Intron	protein_coding	33	chr8	61684188	61714268	-	ENST00000379454.9	Intron	protein_coding	33	chr8	61684188	61714268	-
Merged-chr2-203615969-1	chr2	203615932	203616006	-	0	{'Intergenic': 'Unlabeled'}	{'Intergenic': 'Intergenic'}	{'Intergenic': 0}	{'Intergenic': nan}	{'Intergenic': nan}	{'Intergenic': nan}	{'Intergenic': '-'}	Intergenic	Unlabeled	Intergenic	0				-	['Intergenic']	[]	Intergenic	Unlabeled	Intergenic	0				-	[]	[]	Intergenic	Unlabeled	Intergenic	0				-	Intergenic	Unlabeled	Intergenic	0				-
Merged-chr2-216141255-1	chr2	216141218	216141292	+	0	{'ENST00000392133.7': 'exon'}	{'ENST00000392133.7': 'protein_coding'}	{'ENST00000392133.7': 74}	{'ENST00000392133.7': 'chr2'}	{'ENST00000392133.7': 216141186.0}	{'ENST00000392133.7': 216141319.0}	{'ENST00000392133.7': '+'}	ENST00000392133.7	exon	protein_coding	74	chr2	216141186	216141319	+	['ENST00000392133.7']	[]	ENST00000392133.7	exon	protein_coding	74	chr2	216141186	216141319	+	[]	[]	ENST00000392133.7	exon	protein_coding	74	chr2	216141186	216141319	+	ENST00000392133.7	exon	protein_coding	74	chr2	216141186	216141319	+
Merged-chr2-219543439-1	chr2	219543402	219543476	-	0	{'ENST00000243776.11': 'CDS', 'ENST00000691864.1': 'exon'}	{'ENST00000243776.11': 'protein_coding', 'ENST00000691864.1': 'protein_coding'}	{'ENST00000243776.11': 74, 'ENST00000691864.1': 74}	{'ENST00000243776.11': 'chr2', 'ENST00000691864.1': 'chr2'}	{'ENST00000243776.11': 219543225.0, 'ENST00000691864.1': 219543225.0}	{'ENST00000243776.11': 219543538.0, 'ENST00000691864.1': 219543595.0}	{'ENST00000243776.11': '-', 'ENST00000691864.1': '-'}	ENST00000243776.11	CDS	protein_coding	74	chr2	219543225	219543538	-	['ENST00000243776.11', 'ENST00000691864.1']	['ENST00000243776.11']	ENST00000243776.11	CDS	protein_coding	74	chr2	219543225	219543538	-	[]	[]	ENST00000243776.11	CDS	protein_coding	74	chr2	219543225	219543538	-	ENST00000243776.11	CDS	protein_coding	74	chr2	219543225	219543538	-
Merged-chr2-278241-1	chr2	278204	278278	+	0	{'ENST00000272065.10': '3UTR'}	{'ENST00000272065.10': 'protein_coding'}	{'ENST00000272065.10': 74}	{'ENST00000272065.10': 'chr2'}	{'ENST00000272065.10': 277302.0}	{'ENST00000272065.10': 278283.0}	{'ENST00000272065.10': '+'}	ENST00000272065.10	3UTR	protein_coding	74	chr2	277302	278283	+	['ENST00000272065.10']	['ENST00000272065.10']	ENST00000272065.10	3UTR	protein_coding	74	chr2	277302	278283	+	[]	['ENST00000272065.10']	ENST00000272065.10	3UTR	protein_coding	74	chr2	277302	278283	+	ENST00000272065.10	3UTR	protein_coding	74	chr2	277302	278283	+
Merged-chr8-79918866-1	chr8	79918829	79918903	-	0	{'ENST00000276585.9': '3UTR', 'ENST00000522938.5': 'exon', 'ENST00000649281.1': 'Intron'}	{'ENST00000276585.9': 'protein_coding', 'ENST00000522938.5': 'protein_coding', 'ENST00000649281.1': 'lncRNA'}	{'ENST00000276585.9': 74, 'ENST00000522938.5': 44, 'ENST00000649281.1': 74}	{'ENST00000276585.9': 'chr8', 'ENST00000522938.5': 'chr8', 'ENST00000649281.1': 'chr8'}	{'ENST00000276585.9': 79918717.0, 'ENST00000522938.5': 79918860.0, 'ENST00000649281.1': 79892709.0}	{'ENST00000276585.9': 79918982.0, 'ENST00000522938.5': 79919148.0, 'ENST00000649281.1': 79926333.0}	{'ENST00000276585.9': '-', 'ENST00000522938.5': '-', 'ENST00000649281.1': '+'}	ENST00000276585.9	3UTR	protein_coding	74	chr8	79918717	79918982	-	['ENST00000276585.9', 'ENST00000522938.5', 'ENST00000649281.1']	['ENST00000276585.9']	ENST00000276585.9	3UTR	protein_coding	74	chr8	79918717	79918982	-	[]	['ENST00000276585.9']	ENST00000276585.9	3UTR	protein_coding	74	chr8	79918717	79918982	-	ENST00000276585.9	3UTR	protein_coding	74	chr8	79918717	79918982	-
Merged-chr8-80821462-1	chr8	80821425	80821499	-	0	{'ENST00000519936.2': 'exon', 'ENST00000327835.7': 'CDS'}	{'ENST00000519936.2': 'protein_coding', 'ENST00000327835.7': 'protein_coding'}	{'ENST00000519936.2': 74, 'ENST00000327835.7': 74}	{'ENST00000519936.2': 'chr8', 'ENST00000327835.7': 'chr8'}	{'ENST00000519936.2': 80821374.0, 'ENST00000327835.7': 80821374.0}	{'ENST00000519936.2': 80821615.0, 'ENST00000327835.7': 80821594.0}	{'ENST00000519936.2': '-', 'ENST00000327835.7': '-'}	ENST00000519936.2	exon	protein_coding	74	chr8	80821374	80821615	-	['ENST00000519936.2', 'ENST00000327835.7']	['ENST00000327835.7']	ENST00000327835.7	CDS	protein_coding	74	chr8	80821374	80821594	-	[]	[]	ENST00000327835.7	CDS	protein_coding	74	chr8	80821374	80821594	-	ENST00000327835.7	CDS	protein_coding	74	chr8	80821374	80821594	-
Merged-chr8-89953433-1	chr8	89953396	89953470	-	0	{'ENST00000697292.1': 'exon'}	{'ENST00000697292.1': 'protein_coding'}	{'ENST00000697292.1': 74}	{'ENST00000697292.1': 'chr8'}	{'ENST00000697292.1': 89953244.0}	{'ENST00000697292.1': 89953691.0}	{'ENST00000697292.1': '-'}	ENST00000697292.1	exon	protein_coding	74	chr8	89953244	89953691	-	['ENST00000697292.1']	[]	ENST00000697292.1	exon	protein_coding	74	chr8	89953244	89953691	-	[]	[]	ENST00000697292.1	exon	protein_coding	74	chr8	89953244	89953691	-	ENST00000697292.1	exon	protein_coding	74	chr8	89953244	89953691	-
Merged-chr8-93821650-1	chr8	93821613	93821687	+	0	{'Intergenic': 'Unlabeled'}	{'Intergenic': 'Intergenic'}	{'Intergenic': 0}	{'Intergenic': nan}	{'Intergenic': nan}	{'Intergenic': nan}	{'Intergenic': '+'}	Intergenic	Unlabeled	Intergenic	0				+	['Intergenic']	[]	Intergenic	Unlabeled	Intergenic	0				+	[]	[]	Intergenic	Unlabeled	Intergenic	0				+	Intergenic	Unlabeled	Intergenic	0				+
Merged-chr2-5694777-1	chr2	5694740	5694814	+	0	{'ENST00000322002.5': '3UTR'}	{'ENST00000322002.5': 'protein_coding'}	{'ENST00000322002.5': 74}	{'ENST00000322002.5': 'chr2'}	{'ENST00000322002.5': 5694045.0}	{'ENST00000322002.5': 5701385.0}	{'ENST00000322002.5': '+'}	ENST00000322002.5	3UTR	protein_coding	74	chr2	5694045	5701385	+	['ENST00000322002.5']	['ENST00000322002.5']	ENST00000322002.5	3UTR	protein_coding	74	chr2	5694045	5701385	+	[]	['ENST00000322002.5']	ENST00000322002.5	3UTR	protein_coding	74	chr2	5694045	5701385	+	ENST00000322002.5	3UTR	protein_coding	74	chr2	5694045	5701385	+
Merged-chr2-20251164-1	chr2	20251127	20251201	-	0	{'ENST00000338086.9': '3UTR', 'ENST00000704930.1': '3UTR', 'ENST00000361078.7': '3UTR'}	{'ENST00000338086.9': 'protein_coding', 'ENST00000704930.1': 'protein_coding', 'ENST00000361078.7': 'protein_coding'}	{'ENST00000338086.9': 74, 'ENST00000704930.1': 74, 'ENST00000361078.7': 74}	{'ENST00000338086.9': 'chr2', 'ENST00000704930.1': 'chr2', 'ENST00000361078.7': 'chr2'}	{'ENST00000338086.9': 20248691.0, 'ENST00000704930.1': 20248717.0, 'ENST00000361078.7': 20248737.0}	{'ENST00000338086.9': 20251587.0, 'ENST00000704930.1': 20251587.0, 'ENST00000361078.7': 20251587.0}	{'ENST00000338086.9': '-', 'ENST00000704930.1': '-', 'ENST00000361078.7': '-'}	ENST00000361078.7	3UTR	protein_coding	74	chr2	20248737	20251587	-	['ENST00000338086.9', 'ENST00000704930.1', 'ENST00000361078.7']	['ENST00000361078.7']	ENST00000361078.7	3UTR	protein_coding	74	chr2	20248737	20251587	-	[]	['ENST00000338086.9', 'ENST00000704930.1', 'ENST00000361078.7']	ENST00000338086.9	3UTR	protein_coding	74	chr2	20248691	20251587	-	ENST00000361078.7	3UTR	protein_coding	74	chr2	20248737	20251587	-
Merged-chr2-27377123-1	chr2	27377086	27377160	+	0	{'ENST00000537606.5': '3UTR', 'ENST00000233575.7': '3UTR'}	{'ENST00000537606.5': 'protein_coding', 'ENST00000233575.7': 'protein_coding'}	{'ENST00000537606.5': 74, 'ENST00000233575.7': 74}	{'ENST00000537606.5': 'chr2', 'ENST00000233575.7': 'chr2'}	{'ENST00000537606.5': 27376717.0, 'ENST00000233575.7': 27376717.0}	{'ENST00000537606.5': 27377533.0, 'ENST00000233575.7': 27377535.0}	{'ENST00000537606.5': '+', 'ENST00000233575.7': '+'}	ENST00000537606.5	3UTR	protein_coding	74	chr2	27376717	27377533	+	['ENST00000537606.5', 'ENST00000233575.7']	['ENST00000233575.7']	ENST00000233575.7	3UTR	protein_coding	74	chr2	27376717	27377535	+	[]	['ENST00000537606.5', 'ENST00000233575.7']	ENST00000537606.5	3UTR	protein_coding	74	chr2	27376717	27377533	+	ENST00000233575.7	3UTR	protein_coding	74	chr2	27376717	27377535	+
Merged-chr8-107250671-1	chr8	107250634	107250708	-	0	{'ENST00000517746.6': '3UTR'}	{'ENST00000517746.6': 'protein_coding'}	{'ENST00000517746.6': 74}	{'ENST00000517746.6': 'chr8'}	{'ENST00000517746.6': 107249482.0}	{'ENST00000517746.6': 107251857.0}	{'ENST00000517746.6': '-'}	ENST00000517746.6	3UTR	protein_coding	74	chr8	107249482	107251857	-	['ENST00000517746.6']	['ENST00000517746.6']	ENST00000517746.6	3UTR	protein_coding	74	chr8	107249482	107251857	-	[]	['ENST00000517746.6']	ENST00000517746.6	3UTR	protein_coding	74	chr8	107249482	107251857	-	ENST00000517746.6	3UTR	protein_coding	74	chr8	107249482	107251857	-
Merged-chr8-124543139-1	chr8	124543102	124543176	+	0	{'ENST00000606244.2': 'exon', 'ENST00000517367.1': 'Intron'}	{'ENST00000606244.2': 'protein_coding', 'ENST00000517367.1': 'protein_coding'}	{'ENST00000606244.2': 74, 'ENST00000517367.1': 17}	{'ENST00000606244.2': 'chr8', 'ENST00000517367.1': 'chr8'}	{'ENST00000606244.2': 124543087.0, 'ENST00000517367.1': 124539287.0}	{'ENST00000606244.2': 124543279.0, 'ENST00000517367.1': 124543119.0}	{'ENST00000606244.2': '+', 'ENST00000517367.1': '+'}	ENST00000606244.2	exon	protein_coding	74	chr8	124543087	124543279	+	['ENST00000606244.2', 'ENST00000517367.1']	[]	ENST00000606244.2	exon	protein_coding	74	chr8	124543087	124543279	+	[]	[]	ENST00000606244.2	exon	protein_coding	74	chr8	124543087	124543279	+	ENST00000606244.2	exon	protein_coding	74	chr8	124543087	124543279	+
Merged-chr8-144850442-1	chr8	144850405	144850479	-	0	{'ENST00000402718.4': 'exon', 'ENST00000543949.2': 'exon', 'ENST00000305103.4': 'exon', 'ENST00000450361.2': 'exon'}	{'ENST00000402718.4': 'protein_coding', 'ENST00000543949.2': 'protein_coding', 'ENST00000305103.4': 'protein_coding', 'ENST00000450361.2': 'protein_coding'}	{'ENST00000402718.4': 74, 'ENST00000543949.2': 74, 'ENST00000305103.4': 74, 'ENST00000450361.2': 74}	{'ENST00000402718.4': 'chr8', 'ENST00000543949.2': 'chr8', 'ENST00000305103.4': 'chr8', 'ENST00000450361.2': 'chr8'}	{'ENST00000402718.4': 144850166.0, 'ENST00000543949.2': 144850167.0, 'ENST00000305103.4': 144850176.0, 'ENST00000450361.2': 144850188.0}	{'ENST00000402718.4': 144851395.0, 'ENST00000543949.2': 144851395.0, 'ENST00000305103.4': 144851395.0, 'ENST00000450361.2': 144851395.0}	{'ENST00000402718.4': '-', 'ENST00000543949.2': '-', 'ENST00000305103.4': '-', 'ENST00000450361.2': '-'}	ENST00000450361.2	exon	protein_coding	74	chr8	144850188	144851395	-	['ENST00000402718.4', 'ENST00000543949.2', 'ENST00000305103.4', 'ENST00000450361.2']	['ENST00000305103.4']	ENST00000305103.4	exon	protein_coding	74	chr8	144850176	144851395	-	[]	[]	ENST00000305103.4	exon	protein_coding	74	chr8	144850176	144851395	-	ENST00000305103.4	exon	protein_coding	74	chr8	144850176	144851395	-
Merged-chr2-47905777-1	chr2	47905740	47905814	-	0	{'ENST00000403359.8': '5UTR'}	{'ENST00000403359.8': 'protein_coding'}	{'ENST00000403359.8': 74}	{'ENST00000403359.8': 'chr2'}	{'ENST00000403359.8': 47905721.0}	{'ENST00000403359.8': 47906498.0}	{'ENST00000403359.8': '-'}	ENST00000403359.8	5UTR	protein_coding	74	chr2	47905721	47906498	-	['ENST00000403359.8']	['ENST00000403359.8']	ENST00000403359.8	5UTR	protein_coding	74	chr2	47905721	47906498	-	['ENST00000403359.8']	[]	ENST00000403359.8	5UTR	protein_coding	74	chr2	47905721	47906498	-	ENST00000403359.8	5UTR	protein_coding	74	chr2	47905721	47906498	-
Merged-chr2-64092875-1	chr2	64092838	64092912	-	0	{'ENST00000358912.5': '3UTR'}	{'ENST00000358912.5': 'protein_coding'}	{'ENST00000358912.5': 74}	{'ENST00000358912.5': 'chr2'}	{'ENST00000358912.5': 64092652.0}	{'ENST00000358912.5': 64094704.0}	{'ENST00000358912.5': '-'}	ENST00000358912.5	3UTR	protein_coding	74	chr2	64092652	64094704	-	['ENST00000358912.5']	['ENST00000358912.5']	ENST00000358912.5	3UTR	protein_coding	74	chr2	64092652	64094704	-	[]	['ENST00000358912.5']	ENST00000358912.5	3UTR	protein_coding	74	chr2	64092652	64094704	-	ENST00000358912.5	3UTR	protein_coding	74	chr2	64092652	64094704	-
Merged-chr16-2757537-1	chr16	2757500	2757574	+	0	{'ENST00000576924.6': 'exon', 'ENST00000570971.2': '5UTR'}	{'ENST00000576924.6': 'protein_coding', 'ENST00000570971.2': 'protein_coding'}	{'ENST00000576924.6': 74, 'ENST00000570971.2': 17}	{'ENST00000576924.6': 'chr16', 'ENST00000570971.2': 'chr16'}	{'ENST00000576924.6': 2757472.0, 'ENST00000570971.2': 2757476.0}	{'ENST00000576924.6': 2757579.0, 'ENST00000570971.2': 2757517.0}	{'ENST00000576924.6': '+', 'ENST00000570971.2': '+'}	ENST00000576924.6	exon	protein_coding	74	chr16	2757472	2757579	+	['ENST00000576924.6', 'ENST00000570971.2']	[]	ENST00000576924.6	exon	protein_coding	74	chr16	2757472	2757579	+	['ENST00000570971.2']	[]	ENST00000576924.6	exon	protein_coding	74	chr16	2757472	2757579	+	ENST00000570971.2	5UTR	protein_coding	17	chr16	2757476	2757517	+
Merged-chr2-135937130-1	chr2	135937093	135937167	-	0	{'ENST00000264161.9': 'Intron'}	{'ENST00000264161.9': 'protein_coding'}	{'ENST00000264161.9': 74}	{'ENST00000264161.9': 'chr2'}	{'ENST00000264161.9': 135933990.0}	{'ENST00000264161.9': 135943377.0}	{'ENST00000264161.9': '-'}	ENST00000264161.9	Intron	protein_coding	74	chr2	135933990	135943377	-	['ENST00000264161.9']	['ENST00000264161.9']	ENST00000264161.9	Intron	protein_coding	74	chr2	135933990	135943377	-	[]	[]	ENST00000264161.9	Intron	protein_coding	74	chr2	135933990	135943377	-	ENST00000264161.9	Intron	protein_coding	74	chr2	135933990	135943377	-
Merged-chr16-69321201-1	chr16	69321164	69321238	+	0	{'ENST00000570054.3': 'exon'}	{'ENST00000570054.3': 'protein_coding'}	{'ENST00000570054.3': 74}	{'ENST00000570054.3': 'chr16'}	{'ENST00000570054.3': 69321051.0}	{'ENST00000570054.3': 69321270.0}	{'ENST00000570054.3': '+'}	ENST00000570054.3	exon	protein_coding	74	chr16	69321051	69321270	+	['ENST00000570054.3']	[]	ENST00000570054.3	exon	protein_coding	74	chr16	69321051	69321270	+	[]	[]	ENST00000570054.3	exon	protein_coding	74	chr16	69321051	69321270	+	ENST00000570054.3	exon	protein_coding	74	chr16	69321051	69321270	+
Merged-chr2-207075202-1	chr2	207075165	207075239	-	0	{'ENST00000309446.11': '3UTR'}	{'ENST00000309446.11': 'protein_coding'}	{'ENST00000309446.11': 74}	{'ENST00000309446.11': 'chr2'}	{'ENST00000309446.11': 207074137.0}	{'ENST00000309446.11': 207081215.0}	{'ENST00000309446.11': '-'}	ENST00000309446.11	3UTR	protein_coding	74	chr2	207074137	207081215	-	['ENST00000309446.11']	['ENST00000309446.11']	ENST00000309446.11	3UTR	protein_coding	74	chr2	207074137	207081215	-	[]	['ENST00000309446.11']	ENST00000309446.11	3UTR	protein_coding	74	chr2	207074137	207081215	-	ENST00000309446.11	3UTR	protein_coding	74	chr2	207074137	207081215	-
Merged-chr2-207165981-1	chr2	207165944	207166018	-	0	{'ENST00000309446.11': '5UTR', 'ENST00000703734.1': '5UTR', 'ENST00000458272.2': 'exon', 'ENST00000423015.5': 'Intron', 'ENST00000421199.5': 'Intron'}	{'ENST00000309446.11': 'protein_coding', 'ENST00000703734.1': 'protein_coding', 'ENST00000458272.2': 'protein_coding', 'ENST00000423015.5': 'protein_coding', 'ENST00000421199.5': 'protein_coding'}	{'ENST00000309446.11': 4, 'ENST00000703734.1': 74, 'ENST00000458272.2': 58, 'ENST00000423015.5': 74, 'ENST00000421199.5': 74}	{'ENST00000309446.11': 'chr2', 'ENST00000703734.1': 'chr2', 'ENST00000458272.2': 'chr2', 'ENST00000423015.5': 'chr2', 'ENST00000421199.5': 'chr2'}	{'ENST00000309446.11': 207165569.0, 'ENST00000703734.1': 207165569.0, 'ENST00000458272.2': 207165913.0, 'ENST00000423015.5': 207165706.0, 'ENST00000421199.5': 207124404.0}	{'ENST00000309446.11': 207165948.0, 'ENST00000703734.1': 207166018.0, 'ENST00000458272.2': 207166002.0, 'ENST00000423015.5': 207166756.0, 'ENST00000421199.5': 207167139.0}	{'ENST00000309446.11': '-', 'ENST00000703734.1': '-', 'ENST00000458272.2': '-', 'ENST00000423015.5': '-', 'ENST00000421199.5': '-'}	ENST00000423015.5	Intron	protein_coding	74	chr2	207165706	207166756	-	['ENST00000309446.11', 'ENST00000703734.1', 'ENST00000458272.2', 'ENST00000423015.5', 'ENST00000421199.5']	['ENST00000309446.11']	ENST00000309446.11	5UTR	protein_coding	4	chr2	207165569	207165948	-	['ENST00000309446.11', 'ENST00000703734.1']	[]	ENST00000309446.11	5UTR	protein_coding	4	chr2	207165569	207165948	-	ENST00000703734.1	5UTR	protein_coding	74	chr2	207165569	207166018	-
Merged-chr2-209653291-1	chr2	209653254	209653328	+	0	{'ENST00000682079.1': 'CDS'}	{'ENST00000682079.1': 'protein_coding'}	{'ENST00000682079.1': 74}	{'ENST00000682079.1': 'chr2'}	{'ENST00000682079.1': 209653171.0}	{'ENST00000682079.1': 209653432.0}	{'ENST00000682079.1': '+'}	ENST00000682079.1	CDS	protein_coding	74	chr2	209653171	209653432	+	['ENST00000682079.1']	['ENST00000682079.1']	ENST00000682079.1	CDS	protein_coding	74	chr2	209653171	209653432	+	[]	[]	ENST00000682079.1	CDS	protein_coding	74	chr2	209653171	209653432	+	ENST00000682079.1	CDS	protein_coding	74	chr2	209653171	209653432	+
Merged-chr2-210023064-1	chr2	210023027	210023101	-	0	{'ENST00000281772.14': 'CDS', 'ENST00000418791.5': 'exon'}	{'ENST00000281772.14': 'protein_coding', 'ENST00000418791.5': 'protein_coding'}	{'ENST00000281772.14': 74, 'ENST00000418791.5': 74}	{'ENST00000281772.14': 'chr2', 'ENST00000418791.5': 'chr2'}	{'ENST00000281772.14': 210022952.0, 'ENST00000418791.5': 210022433.0}	{'ENST00000281772.14': 210023179.0, 'ENST00000418791.5': 210023179.0}	{'ENST00000281772.14': '-', 'ENST00000418791.5': '-'}	ENST00000281772.14	CDS	protein_coding	74	chr2	210022952	210023179	-	['ENST00000281772.14', 'ENST00000418791.5']	['ENST00000281772.14']	ENST00000281772.14	CDS	protein_coding	74	chr2	210022952	210023179	-	[]	[]	ENST00000281772.14	CDS	protein_coding	74	chr2	210022952	210023179	-	ENST00000281772.14	CDS	protein_coding	74	chr2	210022952	210023179	-
Merged-chr16-3486942-1	chr16	3486905	3486979	+	0	{'ENST00000407558.9': 'exon', 'ENST00000649205.1': '3UTR', 'ENST00000649360.1': '3UTR', 'ENST00000360862.9': 'exon', 'ENST00000572584.2': '3UTR', 'ENST00000574423.2': 'Intron'}	{'ENST00000407558.9': 'protein_coding', 'ENST00000649205.1': 'protein_coding', 'ENST00000649360.1': 'protein_coding', 'ENST00000360862.9': 'protein_coding', 'ENST00000572584.2': 'protein_coding', 'ENST00000574423.2': 'lncRNA'}	{'ENST00000407558.9': 48, 'ENST00000649205.1': 4, 'ENST00000649360.1': 11, 'ENST00000360862.9': 47, 'ENST00000572584.2': 9, 'ENST00000574423.2': 74}	{'ENST00000407558.9': 'chr16', 'ENST00000649205.1': 'chr16', 'ENST00000649360.1': 'chr16', 'ENST00000360862.9': 'chr16', 'ENST00000572584.2': 'chr16', 'ENST00000574423.2': 'chr16'}	{'ENST00000407558.9': 3485467.0, 'ENST00000649205.1': 3484853.0, 'ENST00000649360.1': 3484853.0, 'ENST00000360862.9': 3485467.0, 'ENST00000572584.2': 3484853.0, 'ENST00000574423.2': 3458181.0}	{'ENST00000407558.9': 3486953.0, 'ENST00000649205.1': 3486909.0, 'ENST00000649360.1': 3486916.0, 'ENST00000360862.9': 3486952.0, 'ENST00000572584.2': 3486914.0, 'ENST00000574423.2': 3506330.0}	{'ENST00000407558.9': '+', 'ENST00000649205.1': '+', 'ENST00000649360.1': '+', 'ENST00000360862.9': '+', 'ENST00000572584.2': '+', 'ENST00000574423.2': '+'}	ENST00000574423.2	Intron	lncRNA	74	chr16	3458181	3506330	+	['ENST00000407558.9', 'ENST00000649205.1', 'ENST00000649360.1', 'ENST00000360862.9', 'ENST00000572584.2', 'ENST00000574423.2']	['ENST00000407558.9']	ENST00000407558.9	exon	protein_coding	48	chr16	3485467	3486953	+	[]	['ENST00000649205.1', 'ENST00000649360.1', 'ENST00000572584.2']	ENST00000649360.1	3UTR	protein_coding	11	chr16	3484853	3486916	+	ENST00000407558.9	exon	protein_coding	48	chr16	3485467	3486953	+
Merged-chr16-11868385-1	chr16	11868348	11868422	-	0	{'ENST00000434724.7': '3UTR', 'ENST00000574364.2': 'Intron'}	{'ENST00000434724.7': 'protein_coding', 'ENST00000574364.2': 'lncRNA'}	{'ENST00000434724.7': 74, 'ENST00000574364.2': 74}	{'ENST00000434724.7': 'chr16', 'ENST00000574364.2': 'chr16'}	{'ENST00000434724.7': 11868128.0, 'ENST00000574364.2': 11852087.0}	{'ENST00000434724.7': 11873121.0, 'ENST00000574364.2': 11895488.0}	{'ENST00000434724.7': '-', 'ENST00000574364.2': '+'}	ENST00000434724.7	3UTR	protein_coding	74	chr16	11868128	11873121	-	['ENST00000434724.7', 'ENST00000574364.2']	['ENST00000434724.7']	ENST00000434724.7	3UTR	protein_coding	74	chr16	11868128	11873121	-	[]	['ENST00000434724.7']	ENST00000434724.7	3UTR	protein_coding	74	chr16	11868128	11873121	-	ENST00000434724.7	3UTR	protein_coding	74	chr16	11868128	11873121	-
Merged-chr16-11872674-1	chr16	11872637	11872711	-	0	{'ENST00000434724.7': '3UTR', 'ENST00000439887.6': '3UTR', 'ENST00000563468.5': '3UTR', 'ENST00000574364.2': 'Intron'}	{'ENST00000434724.7': 'protein_coding', 'ENST00000439887.6': 'protein_coding', 'ENST00000563468.5': 'protein_coding', 'ENST00000574364.2': 'lncRNA'}	{'ENST00000434724.7': 74, 'ENST00000439887.6': 33, 'ENST00000563468.5': 28, 'ENST00000574364.2': 74}	{'ENST00000434724.7': 'chr16', 'ENST00000439887.6': 'chr16', 'ENST00000563468.5': 'chr16', 'ENST00000574364.2': 'chr16'}	{'ENST00000434724.7': 11868128.0, 'ENST00000439887.6': 11872679.0, 'ENST00000563468.5': 11872684.0, 'ENST00000574364.2': 11852087.0}	{'ENST00000434724.7': 11873121.0, 'ENST00000439887.6': 11873121.0, 'ENST00000563468.5': 11873121.0, 'ENST00000574364.2': 11895488.0}	{'ENST00000434724.7': '-', 'ENST00000439887.6': '-', 'ENST00000563468.5': '-', 'ENST00000574364.2': '+'}	ENST00000434724.7	3UTR	protein_coding	74	chr16	11868128	11873121	-	['ENST00000434724.7', 'ENST00000439887.6', 'ENST00000563468.5', 'ENST00000574364.2']	['ENST00000434724.7']	ENST00000434724.7	3UTR	protein_coding	74	chr16	11868128	11873121	-	[]	['ENST00000434724.7', 'ENST00000439887.6', 'ENST00000563468.5']	ENST00000434724.7	3UTR	protein_coding	74	chr16	11868128	11873121	-	ENST00000434724.7	3UTR	protein_coding	74	chr16	11868128	11873121	-
Merged-chr2-26190730-1	chr2	26190693	26190767	-	0	{'ENST00000380649.8': '3UTR', 'ENST00000492433.2': '3UTR'}	{'ENST00000380649.8': 'protein_coding', 'ENST00000492433.2': 'protein_coding'}	{'ENST00000380649.8': 74, 'ENST00000492433.2': 74}	{'ENST00000380649.8': 'chr2', 'ENST00000492433.2': 'chr2'}	{'ENST00000380649.8': 26190635.0, 'ENST00000492433.2': 26190655.0}	{'ENST00000380649.8': 26191252.0, 'ENST00000492433.2': 26191252.0}	{'ENST00000380649.8': '-', 'ENST00000492433.2': '-'}	ENST00000492433.2	3UTR	protein_coding	74	chr2	26190655	26191252	-	['ENST00000380649.8', 'ENST00000492433.2']	['ENST00000380649.8']	ENST00000380649.8	3UTR	protein_coding	74	chr2	26190635	26191252	-	[]	['ENST00000380649.8', 'ENST00000492433.2']	ENST00000380649.8	3UTR	protein_coding	74	chr2	26190635	26191252	-	ENST00000380649.8	3UTR	protein_coding	74	chr2	26190635	26191252	-
Merged-chr16-30114122-1	chr16	30114085	30114159	-	0	{'ENST00000263025.9': 'exon', 'ENST00000484663.5': 'exon'}	{'ENST00000263025.9': 'protein_coding', 'ENST00000484663.5': 'protein_coding'}	{'ENST00000263025.9': 55, 'ENST00000484663.5': 54}	{'ENST00000263025.9': 'chr16', 'ENST00000484663.5': 'chr16'}	{'ENST00000263025.9': 30114105.0, 'ENST00000484663.5': 30114106.0}	{'ENST00000263025.9': 30114708.0, 'ENST00000484663.5': 30114708.0}	{'ENST00000263025.9': '-', 'ENST00000484663.5': '-'}	ENST00000263025.9	exon	protein_coding	55	chr16	30114105	30114708	-	['ENST00000263025.9', 'ENST00000484663.5']	['ENST00000263025.9']	ENST00000263025.9	exon	protein_coding	55	chr16	30114105	30114708	-	[]	[]	ENST00000263025.9	exon	protein_coding	55	chr16	30114105	30114708	-	ENST00000263025.9	exon	protein_coding	55	chr16	30114105	30114708	-
Merged-chr2-26792196-1	chr2	26792159	26792233	+	0	{'ENST00000335756.9': 'exon'}	{'ENST00000335756.9': 'protein_coding'}	{'ENST00000335756.9': 74}	{'ENST00000335756.9': 'chr2'}	{'ENST00000335756.9': 26792131.0}	{'ENST00000335756.9': 26792240.0}	{'ENST00000335756.9': '+'}	ENST00000335756.9	exon	protein_coding	74	chr2	26792131	26792240	+	['ENST00000335756.9']	['ENST00000335756.9']	ENST00000335756.9	exon	protein_coding	74	chr2	26792131	26792240	+	[]	[]	ENST00000335756.9	exon	protein_coding	74	chr2	26792131	26792240	+	ENST00000335756.9	exon	protein_coding	74	chr2	26792131	26792240	+
Merged-chr2-39454354-1	chr2	39454317	39454391	+	0	{'ENST00000426083.5': 'Intron'}	{'ENST00000426083.5': 'lncRNA'}	{'ENST00000426083.5': 27}	{'ENST00000426083.5': 'chr2'}	{'ENST00000426083.5': 39454365.0}	{'ENST00000426083.5': 39516413.0}	{'ENST00000426083.5': '+'}	ENST00000426083.5	Intron	lncRNA	27	chr2	39454365	39516413	+	['ENST00000426083.5']	[]	ENST00000426083.5	Intron	lncRNA	27	chr2	39454365	39516413	+	[]	[]	ENST00000426083.5	Intron	lncRNA	27	chr2	39454365	39516413	+	ENST00000426083.5	Intron	lncRNA	27	chr2	39454365	39516413	+
Merged-chr2-42351127-1	chr2	42351090	42351164	-	0	{'ENST00000234301.3': '3UTR'}	{'ENST00000234301.3': 'protein_coding'}	{'ENST00000234301.3': 74}	{'ENST00000234301.3': 'chr2'}	{'ENST00000234301.3': 42349338.0}	{'ENST00000234301.3': 42351221.0}	{'ENST00000234301.3': '-'}	ENST00000234301.3	3UTR	protein_coding	74	chr2	42349338	42351221	-	['ENST00000234301.3']	['ENST00000234301.3']	ENST00000234301.3	3UTR	protein_coding	74	chr2	42349338	42351221	-	[]	['ENST00000234301.3']	ENST00000234301.3	3UTR	protein_coding	74	chr2	42349338	42351221	-	ENST00000234301.3	3UTR	protein_coding	74	chr2	42349338	42351221	-
Merged-chr2-43381715-1	chr2	43381678	43381752	-	0	{'ENST00000405975.7': 'Intron'}	{'ENST00000405975.7': 'protein_coding'}	{'ENST00000405975.7': 74}	{'ENST00000405975.7': 'chr2'}	{'ENST00000405975.7': 43344237.0}	{'ENST00000405975.7': 43397970.0}	{'ENST00000405975.7': '-'}	ENST00000405975.7	Intron	protein_coding	74	chr2	43344237	43397970	-	['ENST00000405975.7']	['ENST00000405975.7']	ENST00000405975.7	Intron	protein_coding	74	chr2	43344237	43397970	-	[]	[]	ENST00000405975.7	Intron	protein_coding	74	chr2	43344237	43397970	-	ENST00000405975.7	Intron	protein_coding	74	chr2	43344237	43397970	-
Merged-chr2-46901870-1	chr2	46901833	46901907	-	0	{'ENST00000444761.6': '3UTR', 'ENST00000409105.5': '3UTR', 'ENST00000429761.1': 'Intron'}	{'ENST00000444761.6': 'protein_coding', 'ENST00000409105.5': 'protein_coding', 'ENST00000429761.1': 'lncRNA'}	{'ENST00000444761.6': 38, 'ENST00000409105.5': 34, 'ENST00000429761.1': 74}	{'ENST00000444761.6': 'chr2', 'ENST00000409105.5': 'chr2', 'ENST00000429761.1': 'chr2'}	{'ENST00000444761.6': 46901870.0, 'ENST00000409105.5': 46901874.0, 'ENST00000429761.1': 46899314.0}	{'ENST00000444761.6': 46905465.0, 'ENST00000409105.5': 46905465.0, 'ENST00000429761.1': 46906883.0}	{'ENST00000444761.6': '-', 'ENST00000409105.5': '-', 'ENST00000429761.1': '+'}	ENST00000429761.1	Intron	lncRNA	74	chr2	46899314	46906883	+	['ENST00000444761.6', 'ENST00000409105.5', 'ENST00000429761.1']	[]	ENST00000429761.1	Intron	lncRNA	74	chr2	46899314	46906883	+	[]	['ENST00000444761.6', 'ENST00000409105.5']	ENST00000444761.6	3UTR	protein_coding	38	chr2	46901870	46905465	-	ENST00000429761.1	Intron	lncRNA	74	chr2	46899314	46906883	+
Merged-chr16-1770421-1	chr16	1770384	1770458	-	0	{'ENST00000219302.8': '3UTR', 'ENST00000563498.1': '3UTR'}	{'ENST00000219302.8': 'protein_coding', 'ENST00000563498.1': 'protein_coding'}	{'ENST00000219302.8': 74, 'ENST00000563498.1': 74}	{'ENST00000219302.8': 'chr16', 'ENST00000563498.1': 'chr16'}	{'ENST00000219302.8': 1770320.0, 'ENST00000563498.1': 1770344.0}	{'ENST00000219302.8': 1770651.0, 'ENST00000563498.1': 1770651.0}	{'ENST00000219302.8': '-', 'ENST00000563498.1': '-'}	ENST00000563498.1	3UTR	protein_coding	74	chr16	1770344	1770651	-	['ENST00000219302.8', 'ENST00000563498.1']	['ENST00000219302.8']	ENST00000219302.8	3UTR	protein_coding	74	chr16	1770320	1770651	-	[]	['ENST00000219302.8', 'ENST00000563498.1']	ENST00000219302.8	3UTR	protein_coding	74	chr16	1770320	1770651	-	ENST00000219302.8	3UTR	protein_coding	74	chr16	1770320	1770651	-
Merged-chr2-46916115-1	chr2	46916078	46916152	+	0	{'ENST00000409218.5': 'exon', 'ENST00000444761.6': 'Intron', 'ENST00000409207.5': 'Intron'}	{'ENST00000409218.5': 'protein_coding', 'ENST00000444761.6': 'protein_coding', 'ENST00000409207.5': 'protein_coding'}	{'ENST00000409218.5': 34, 'ENST00000444761.6': 74, 'ENST00000409207.5': 74}	{'ENST00000409218.5': 'chr2', 'ENST00000444761.6': 'chr2', 'ENST00000409207.5': 'chr2'}	{'ENST00000409218.5': 46915981.0, 'ENST00000444761.6': 46907969.0, 'ENST00000409207.5': 46909177.0}	{'ENST00000409218.5': 46916112.0, 'ENST00000444761.6': 46941571.0, 'ENST00000409207.5': 46941571.0}	{'ENST00000409218.5': '-', 'ENST00000444761.6': '-', 'ENST00000409207.5': '-'}	ENST00000409207.5	Intron	protein_coding	74	chr2	46909177	46941571	-	['ENST00000409218.5', 'ENST00000444761.6', 'ENST00000409207.5']	[]	ENST00000409207.5	Intron	protein_coding	74	chr2	46909177	46941571	-	[]	[]	ENST00000409207.5	Intron	protein_coding	74	chr2	46909177	46941571	-	ENST00000409207.5	Intron	protein_coding	74	chr2	46909177	46941571	-
Merged-chr2-55317598-1	chr2	55317561	55317635	-	0	{'ENST00000336838.10': 'Intron', 'ENST00000599475.1': 'Intron'}	{'ENST00000336838.10': 'protein_coding', 'ENST00000599475.1': 'lncRNA'}	{'ENST00000336838.10': 2, 'ENST00000599475.1': 74}	{'ENST00000336838.10': 'chr2', 'ENST00000599475.1': 'chr2'}	{'ENST00000336838.10': 55317349.0, 'ENST00000599475.1': 55314251.0}	{'ENST00000336838.10': 55317563.0, 'ENST00000599475.1': 55339502.0}	{'ENST00000336838.10': '-', 'ENST00000599475.1': '+'}	ENST00000599475.1	Intron	lncRNA	74	chr2	55314251	55339502	+	['ENST00000336838.10', 'ENST00000599475.1']	[]	ENST00000599475.1	Intron	lncRNA	74	chr2	55314251	55339502	+	[]	[]	ENST00000599475.1	Intron	lncRNA	74	chr2	55314251	55339502	+	ENST00000599475.1	Intron	lncRNA	74	chr2	55314251	55339502	+
Merged-chr2-61477927-1	chr2	61477890	61477964	-	0	{'ENST00000677476.1': '3UTR', 'ENST00000401558.7': '3UTR', 'ENST00000677850.1': '3UTR', 'ENST00000603199.3': 'Intron', 'ENST00000578974.2': 'Intron'}	{'ENST00000677476.1': 'protein_coding', 'ENST00000401558.7': 'protein_coding', 'ENST00000677850.1': 'protein_coding', 'ENST00000603199.3': 'lncRNA', 'ENST00000578974.2': 'lncRNA'}	{'ENST00000677476.1': 74, 'ENST00000401558.7': 74, 'ENST00000677850.1': 18, 'ENST00000603199.3': 74, 'ENST00000578974.2': 74}	{'ENST00000677476.1': 'chr2', 'ENST00000401558.7': 'chr2', 'ENST00000677850.1': 'chr2', 'ENST00000603199.3': 'chr2', 'ENST00000578974.2': 'chr2'}	{'ENST00000677476.1': 61477689.0, 'ENST00000401558.7': 61477849.0, 'ENST00000677850.1': 61477947.0, 'ENST00000603199.3': 61471808.0, 'ENST00000578974.2': 61471808.0}	{'ENST00000677476.1': 61478822.0, 'ENST00000401558.7': 61478822.0, 'ENST00000677850.1': 61478822.0, 'ENST00000603199.3': 61480299.0, 'ENST00000578974.2': 61482626.0}	{'ENST00000677476.1': '-', 'ENST00000401558.7': '-', 'ENST00000677850.1': '-', 'ENST00000603199.3': '+', 'ENST00000578974.2': '+'}	ENST00000401558.7	3UTR	protein_coding	74	chr2	61477849	61478822	-	['ENST00000677476.1', 'ENST00000401558.7', 'ENST00000677850.1', 'ENST00000603199.3', 'ENST00000578974.2']	['ENST00000401558.7']	ENST00000401558.7	3UTR	protein_coding	74	chr2	61477849	61478822	-	[]	['ENST00000677476.1', 'ENST00000401558.7', 'ENST00000677850.1']	ENST00000677476.1	3UTR	protein_coding	74	chr2	61477689	61478822	-	ENST00000401558.7	3UTR	protein_coding	74	chr2	61477849	61478822	-
Merged-chr2-61492638-1	chr2	61492601	61492675	-	0	{'ENST00000677476.1': 'exon', 'ENST00000451765.6': 'Intron'}	{'ENST00000677476.1': 'protein_coding', 'ENST00000451765.6': 'protein_coding'}	{'ENST00000677476.1': 74, 'ENST00000451765.6': 74}	{'ENST00000677476.1': 'chr2', 'ENST00000451765.6': 'chr2'}	{'ENST00000677476.1': 61492567.0, 'ENST00000451765.6': 61481281.0}	{'ENST00000677476.1': 61492748.0, 'ENST00000451765.6': 61493893.0}	{'ENST00000677476.1': '-', 'ENST00000451765.6': '-'}	ENST00000677476.1	exon	protein_coding	74	chr2	61492567	61492748	-	['ENST00000677476.1', 'ENST00000451765.6']	[]	ENST00000677476.1	exon	protein_coding	74	chr2	61492567	61492748	-	[]	[]	ENST00000677476.1	exon	protein_coding	74	chr2	61492567	61492748	-	ENST00000677476.1	exon	protein_coding	74	chr2	61492567	61492748	-
Merged-chr16-58629768-1	chr16	58629731	58629805	-	0	{'ENST00000317147.10': 'exon', 'ENST00000569240.5': 'exon', 'ENST00000441024.6': 'exon'}	{'ENST00000317147.10': 'protein_coding', 'ENST00000569240.5': 'protein_coding', 'ENST00000441024.6': 'protein_coding'}	{'ENST00000317147.10': 74, 'ENST00000569240.5': 74, 'ENST00000441024.6': 74}	{'ENST00000317147.10': 'chr16', 'ENST00000569240.5': 'chr16', 'ENST00000441024.6': 'chr16'}	{'ENST00000317147.10': 58629728.0, 'ENST00000569240.5': 58629728.0, 'ENST00000441024.6': 58629728.0}	{'ENST00000317147.10': 58629826.0, 'ENST00000569240.5': 58629834.0, 'ENST00000441024.6': 58629838.0}	{'ENST00000317147.10': '-', 'ENST00000569240.5': '-', 'ENST00000441024.6': '-'}	ENST00000317147.10	exon	protein_coding	74	chr16	58629728	58629826	-	['ENST00000317147.10', 'ENST00000569240.5', 'ENST00000441024.6']	['ENST00000317147.10']	ENST00000317147.10	exon	protein_coding	74	chr16	58629728	58629826	-	[]	[]	ENST00000317147.10	exon	protein_coding	74	chr16	58629728	58629826	-	ENST00000317147.10	exon	protein_coding	74	chr16	58629728	58629826	-
Merged-chr2-64631634-1	chr2	64631597	64631671	-	0	{'ENST00000313349.3': '3UTR'}	{'ENST00000313349.3': 'protein_coding'}	{'ENST00000313349.3': 51}	{'ENST00000313349.3': 'chr2'}	{'ENST00000313349.3': 64631621.0}	{'ENST00000313349.3': 64635929.0}	{'ENST00000313349.3': '-'}	ENST00000313349.3	3UTR	protein_coding	51	chr2	64631621	64635929	-	['ENST00000313349.3']	['ENST00000313349.3']	ENST00000313349.3	3UTR	protein_coding	51	chr2	64631621	64635929	-	[]	['ENST00000313349.3']	ENST00000313349.3	3UTR	protein_coding	51	chr2	64631621	64635929	-	ENST00000313349.3	3UTR	protein_coding	51	chr2	64631621	64635929	-
Merged-chr2-85309282-1	chr2	85309245	85309319	+	0	{'ENST00000282111.4': 'CDS'}	{'ENST00000282111.4': 'protein_coding'}	{'ENST00000282111.4': 74}	{'ENST00000282111.4': 'chr2'}	{'ENST00000282111.4': 85309029.0}	{'ENST00000282111.4': 85309459.0}	{'ENST00000282111.4': '+'}	ENST00000282111.4	CDS	protein_coding	74	chr2	85309029	85309459	+	['ENST00000282111.4']	['ENST00000282111.4']	ENST00000282111.4	CDS	protein_coding	74	chr2	85309029	85309459	+	[]	[]	ENST00000282111.4	CDS	protein_coding	74	chr2	85309029	85309459	+	ENST00000282111.4	CDS	protein_coding	74	chr2	85309029	85309459	+
Merged-chr2-96186415-1	chr2	96186378	96186452	-	0	{'ENST00000337288.10': '3UTR'}	{'ENST00000337288.10': 'protein_coding'}	{'ENST00000337288.10': 74}	{'ENST00000337288.10': 'chr2'}	{'ENST00000337288.10': 96184859.0}	{'ENST00000337288.10': 96186732.0}	{'ENST00000337288.10': '-'}	ENST00000337288.10	3UTR	protein_coding	74	chr2	96184859	96186732	-	['ENST00000337288.10']	['ENST00000337288.10']	ENST00000337288.10	3UTR	protein_coding	74	chr2	96184859	96186732	-	[]	['ENST00000337288.10']	ENST00000337288.10	3UTR	protein_coding	74	chr2	96184859	96186732	-	ENST00000337288.10	3UTR	protein_coding	74	chr2	96184859	96186732	-
Merged-chr2-100391978-1	chr2	100391941	100392015	-	0	{'ENST00000264249.8': '3UTR'}	{'ENST00000264249.8': 'protein_coding'}	{'ENST00000264249.8': 74}	{'ENST00000264249.8': 'chr2'}	{'ENST00000264249.8': 100391860.0}	{'ENST00000264249.8': 100393247.0}	{'ENST00000264249.8': '-'}	ENST00000264249.8	3UTR	protein_coding	74	chr2	100391860	100393247	-	['ENST00000264249.8']	['ENST00000264249.8']	ENST00000264249.8	3UTR	protein_coding	74	chr2	100391860	100393247	-	[]	['ENST00000264249.8']	ENST00000264249.8	3UTR	protein_coding	74	chr2	100391860	100393247	-	ENST00000264249.8	3UTR	protein_coding	74	chr2	100391860	100393247	-
Merged-chr16-72783205-1	chr16	72783168	72783242	-	0	{'ENST00000268489.10': '3UTR', 'ENST00000563328.4': 'Intron', 'ENST00000653037.2': 'Intron', 'ENST00000686426.1': 'Intron'}	{'ENST00000268489.10': 'protein_coding', 'ENST00000563328.4': 'lncRNA', 'ENST00000653037.2': 'lncRNA', 'ENST00000686426.1': 'lncRNA'}	{'ENST00000268489.10': 74, 'ENST00000563328.4': 74, 'ENST00000653037.2': 74, 'ENST00000686426.1': 74}	{'ENST00000268489.10': 'chr16', 'ENST00000563328.4': 'chr16', 'ENST00000653037.2': 'chr16', 'ENST00000686426.1': 'chr16'}	{'ENST00000268489.10': 72782885.0, 'ENST00000563328.4': 72781819.0, 'ENST00000653037.2': 72781819.0, 'ENST00000686426.1': 72747182.0}	{'ENST00000268489.10': 72787166.0, 'ENST00000563328.4': 72787162.0, 'ENST00000653037.2': 72820772.0, 'ENST00000686426.1': 72820772.0}	{'ENST00000268489.10': '-', 'ENST00000563328.4': '+', 'ENST00000653037.2': '+', 'ENST00000686426.1': '+'}	ENST00000268489.10	3UTR	protein_coding	74	chr16	72782885	72787166	-	['ENST00000268489.10', 'ENST00000563328.4', 'ENST00000653037.2', 'ENST00000686426.1']	['ENST00000268489.10']	ENST00000268489.10	3UTR	protein_coding	74	chr16	72782885	72787166	-	[]	['ENST00000268489.10']	ENST00000268489.10	3UTR	protein_coding	74	chr16	72782885	72787166	-	ENST00000268489.10	3UTR	protein_coding	74	chr16	72782885	72787166	-
Merged-chr2-111367009-1	chr2	111366972	111367046	-	0	{'ENST00000653568.1': 'exon', 'ENST00000673804.1': 'Intron', 'ENST00000673654.1': 'exon', 'ENST00000645030.2': 'Intron', 'ENST00000673728.1': 'Intron', 'ENST00000674070.1': 'Intron'}	{'ENST00000653568.1': 'lncRNA', 'ENST00000673804.1': 'lncRNA', 'ENST00000673654.1': 'lncRNA', 'ENST00000645030.2': 'lncRNA', 'ENST00000673728.1': 'lncRNA', 'ENST00000674070.1': 'lncRNA'}	{'ENST00000653568.1': 74, 'ENST00000673804.1': 74, 'ENST00000673654.1': 74, 'ENST00000645030.2': 74, 'ENST00000673728.1': 74, 'ENST00000674070.1': 74}	{'ENST00000653568.1': 'chr2', 'ENST00000673804.1': 'chr2', 'ENST00000673654.1': 'chr2', 'ENST00000645030.2': 'chr2', 'ENST00000673728.1': 'chr2', 'ENST00000674070.1': 'chr2'}	{'ENST00000653568.1': 111365561.0, 'ENST00000673804.1': 111365999.0, 'ENST00000673654.1': 111361082.0, 'ENST00000645030.2': 111344237.0, 'ENST00000673728.1': 111350761.0, 'ENST00000674070.1': 111344237.0}	{'ENST00000653568.1': 111367575.0, 'ENST00000673804.1': 111367514.0, 'ENST00000673654.1': 111367575.0, 'ENST00000645030.2': 111367486.0, 'ENST00000673728.1': 111367486.0, 'ENST00000674070.1': 111494884.0}	{'ENST00000653568.1': '-', 'ENST00000673804.1': '-', 'ENST00000673654.1': '-', 'ENST00000645030.2': '-', 'ENST00000673728.1': '-', 'ENST00000674070.1': '-'}	ENST00000673804.1	Intron	lncRNA	74	chr2	111365999	111367514	-	['ENST00000653568.1', 'ENST00000673804.1', 'ENST00000673654.1', 'ENST00000645030.2', 'ENST00000673728.1', 'ENST00000674070.1']	[]	ENST00000673804.1	Intron	lncRNA	74	chr2	111365999	111367514	-	[]	[]	ENST00000673804.1	Intron	lncRNA	74	chr2	111365999	111367514	-	ENST00000673804.1	Intron	lncRNA	74	chr2	111365999	111367514	-
Merged-chr16-371914-1	chr16	371877	371951	-	0	{'ENST00000431232.7': '3UTR', 'ENST00000250930.7': '3UTR'}	{'ENST00000431232.7': 'protein_coding', 'ENST00000250930.7': 'protein_coding'}	{'ENST00000431232.7': 74, 'ENST00000250930.7': 74}	{'ENST00000431232.7': 'chr16', 'ENST00000250930.7': 'chr16'}	{'ENST00000431232.7': 370788.0, 'ENST00000250930.7': 371864.0}	{'ENST00000431232.7': 371989.0, 'ENST00000250930.7': 371989.0}	{'ENST00000431232.7': '-', 'ENST00000250930.7': '-'}	ENST00000250930.7	3UTR	protein_coding	74	chr16	371864	371989	-	['ENST00000431232.7', 'ENST00000250930.7']	['ENST00000431232.7']	ENST00000431232.7	3UTR	protein_coding	74	chr16	370788	371989	-	[]	['ENST00000431232.7', 'ENST00000250930.7']	ENST00000431232.7	3UTR	protein_coding	74	chr16	370788	371989	-	ENST00000431232.7	3UTR	protein_coding	74	chr16	370788	371989	-
Merged-chr2-135761913-1	chr2	135761876	135761950	+	0	{'ENST00000272638.14': 'Intron'}	{'ENST00000272638.14': 'protein_coding'}	{'ENST00000272638.14': 40}	{'ENST00000272638.14': 'chr2'}	{'ENST00000272638.14': 135761911.0}	{'ENST00000272638.14': 135769768.0}	{'ENST00000272638.14': '+'}	ENST00000272638.14	Intron	protein_coding	40	chr2	135761911	135769768	+	['ENST00000272638.14']	['ENST00000272638.14']	ENST00000272638.14	Intron	protein_coding	40	chr2	135761911	135769768	+	[]	[]	ENST00000272638.14	Intron	protein_coding	40	chr2	135761911	135769768	+	ENST00000272638.14	Intron	protein_coding	40	chr2	135761911	135769768	+
Merged-chr2-169636516-1	chr2	169636479	169636553	+	0	{'ENST00000433207.6': 'CDS', 'ENST00000409714.7': 'exon', 'ENST00000448752.7': 'exon', 'ENST00000678088.1': 'exon', 'ENST00000676508.1': 'exon', 'ENST00000679107.1': 'exon'}	{'ENST00000433207.6': 'protein_coding', 'ENST00000409714.7': 'protein_coding', 'ENST00000448752.7': 'protein_coding', 'ENST00000678088.1': 'protein_coding', 'ENST00000676508.1': 'protein_coding', 'ENST00000679107.1': 'protein_coding'}	{'ENST00000433207.6': 74, 'ENST00000409714.7': 74, 'ENST00000448752.7': 74, 'ENST00000678088.1': 74, 'ENST00000676508.1': 74, 'ENST00000679107.1': 74}	{'ENST00000433207.6': 'chr2', 'ENST00000409714.7': 'chr2', 'ENST00000448752.7': 'chr2', 'ENST00000678088.1': 'chr2', 'ENST00000676508.1': 'chr2', 'ENST00000679107.1': 'chr2'}	{'ENST00000433207.6': 169636413.0, 'ENST00000409714.7': 169636413.0, 'ENST00000448752.7': 169636413.0, 'ENST00000678088.1': 169636413.0, 'ENST00000676508.1': 169636413.0, 'ENST00000679107.1': 169636413.0}	{'ENST00000433207.6': 169637520.0, 'ENST00000409714.7': 169637711.0, 'ENST00000448752.7': 169637961.0, 'ENST00000678088.1': 169641390.0, 'ENST00000676508.1': 169641406.0, 'ENST00000679107.1': 169641389.0}	{'ENST00000433207.6': '+', 'ENST00000409714.7': '+', 'ENST00000448752.7': '+', 'ENST00000678088.1': '+', 'ENST00000676508.1': '+', 'ENST00000679107.1': '+'}	ENST00000433207.6	CDS	protein_coding	74	chr2	169636413	169637520	+	['ENST00000433207.6', 'ENST00000409714.7', 'ENST00000448752.7', 'ENST00000678088.1', 'ENST00000676508.1', 'ENST00000679107.1']	[]	ENST00000433207.6	CDS	protein_coding	74	chr2	169636413	169637520	+	[]	[]	ENST00000433207.6	CDS	protein_coding	74	chr2	169636413	169637520	+	ENST00000433207.6	CDS	protein_coding	74	chr2	169636413	169637520	+
Merged-chr2-170993489-1	chr2	170993452	170993526	-	0	{'ENST00000360843.7': '3UTR', 'ENST00000521943.5': '3UTR'}	{'ENST00000360843.7': 'protein_coding', 'ENST00000521943.5': 'protein_coding'}	{'ENST00000360843.7': 74, 'ENST00000521943.5': 20}	{'ENST00000360843.7': 'chr2', 'ENST00000521943.5': 'chr2'}	{'ENST00000360843.7': 170990823.0, 'ENST00000521943.5': 170993507.0}	{'ENST00000360843.7': 170993782.0, 'ENST00000521943.5': 170993782.0}	{'ENST00000360843.7': '-', 'ENST00000521943.5': '-'}	ENST00000360843.7	3UTR	protein_coding	74	chr2	170990823	170993782	-	['ENST00000360843.7', 'ENST00000521943.5']	[]	ENST00000360843.7	3UTR	protein_coding	74	chr2	170990823	170993782	-	[]	['ENST00000360843.7', 'ENST00000521943.5']	ENST00000360843.7	3UTR	protein_coding	74	chr2	170990823	170993782	-	ENST00000360843.7	3UTR	protein_coding	74	chr2	170990823	170993782	-
Merged-chr2-180981003-1	chr2	180980966	180981040	+	0	{'ENST00000410062.9': 'exon', 'ENST00000602475.5': 'exon', 'ENST00000602959.5': 'Intron', 'ENST00000392415.6': 'Intron'}	{'ENST00000410062.9': 'protein_coding', 'ENST00000602475.5': 'protein_coding', 'ENST00000602959.5': 'protein_coding', 'ENST00000392415.6': 'protein_coding'}	{'ENST00000410062.9': 7, 'ENST00000602475.5': 7, 'ENST00000602959.5': 68, 'ENST00000392415.6': 74}	{'ENST00000410062.9': 'chr2', 'ENST00000602475.5': 'chr2', 'ENST00000602959.5': 'chr2', 'ENST00000392415.6': 'chr2'}	{'ENST00000410062.9': 180980605.0, 'ENST00000602475.5': 180980807.0, 'ENST00000602959.5': 180980973.0, 'ENST00000392415.6': 180980546.0}	{'ENST00000410062.9': 180980973.0, 'ENST00000602475.5': 180980973.0, 'ENST00000602959.5': 180982017.0, 'ENST00000392415.6': 180982017.0}	{'ENST00000410062.9': '+', 'ENST00000602475.5': '+', 'ENST00000602959.5': '+', 'ENST00000392415.6': '+'}	ENST00000392415.6	Intron	protein_coding	74	chr2	180980546	180982017	+	['ENST00000410062.9', 'ENST00000602475.5', 'ENST00000602959.5', 'ENST00000392415.6']	['ENST00000410062.9']	ENST00000410062.9	exon	protein_coding	7	chr2	180980605	180980973	+	[]	[]	ENST00000410062.9	exon	protein_coding	7	chr2	180980605	180980973	+	ENST00000410062.9	exon	protein_coding	7	chr2	180980605	180980973	+
Merged-chr2-195680204-1	chr2	195680167	195680241	+	0	{'ENST00000409086.7': 'CDS'}	{'ENST00000409086.7': 'protein_coding'}	{'ENST00000409086.7': 74}	{'ENST00000409086.7': 'chr2'}	{'ENST00000409086.7': 195680043.0}	{'ENST00000409086.7': 195681050.0}	{'ENST00000409086.7': '+'}	ENST00000409086.7	CDS	protein_coding	74	chr2	195680043	195681050	+	['ENST00000409086.7']	[]	ENST00000409086.7	CDS	protein_coding	74	chr2	195680043	195681050	+	[]	[]	ENST00000409086.7	CDS	protein_coding	74	chr2	195680043	195681050	+	ENST00000409086.7	CDS	protein_coding	74	chr2	195680043	195681050	+
Merged-chr2-207166663-1	chr2	207166626	207166700	+	0	{'ENST00000423015.5': 'Intron', 'ENST00000421199.5': 'Intron'}	{'ENST00000423015.5': 'protein_coding', 'ENST00000421199.5': 'protein_coding'}	{'ENST00000423015.5': 74, 'ENST00000421199.5': 74}	{'ENST00000423015.5': 'chr2', 'ENST00000421199.5': 'chr2'}	{'ENST00000423015.5': 207165706.0, 'ENST00000421199.5': 207124404.0}	{'ENST00000423015.5': 207166756.0, 'ENST00000421199.5': 207167139.0}	{'ENST00000423015.5': '-', 'ENST00000421199.5': '-'}	ENST00000423015.5	Intron	protein_coding	74	chr2	207165706	207166756	-	['ENST00000423015.5', 'ENST00000421199.5']	[]	ENST00000423015.5	Intron	protein_coding	74	chr2	207165706	207166756	-	[]	[]	ENST00000423015.5	Intron	protein_coding	74	chr2	207165706	207166756	-	ENST00000423015.5	Intron	protein_coding	74	chr2	207165706	207166756	-
Merged-chr2-218249893-1	chr2	218249856	218249930	+	0	{'ENST00000315717.10': 'Intron'}	{'ENST00000315717.10': 'protein_coding'}	{'ENST00000315717.10': 10}	{'ENST00000315717.10': 'chr2'}	{'ENST00000315717.10': 218249921.0}	{'ENST00000315717.10': 218253890.0}	{'ENST00000315717.10': '+'}	ENST00000315717.10	Intron	protein_coding	10	chr2	218249921	218253890	+	['ENST00000315717.10']	['ENST00000315717.10']	ENST00000315717.10	Intron	protein_coding	10	chr2	218249921	218253890	+	[]	[]	ENST00000315717.10	Intron	protein_coding	10	chr2	218249921	218253890	+	ENST00000315717.10	Intron	protein_coding	10	chr2	218249921	218253890	+
Merged-chr17-38799360-1	chr17	38799323	38799397	-	0	{'ENST00000619039.5': 'CDS'}	{'ENST00000619039.5': 'protein_coding'}	{'ENST00000619039.5': 74}	{'ENST00000619039.5': 'chr17'}	{'ENST00000619039.5': 38799266.0}	{'ENST00000619039.5': 38799424.0}	{'ENST00000619039.5': '-'}	ENST00000619039.5	CDS	protein_coding	74	chr17	38799266	38799424	-	['ENST00000619039.5']	['ENST00000619039.5']	ENST00000619039.5	CDS	protein_coding	74	chr17	38799266	38799424	-	[]	[]	ENST00000619039.5	CDS	protein_coding	74	chr17	38799266	38799424	-	ENST00000619039.5	CDS	protein_coding	74	chr17	38799266	38799424	-
Merged-chr17-38900108-1	chr17	38900071	38900145	+	0	{'ENST00000433206.6': 'Intron'}	{'ENST00000433206.6': 'protein_coding'}	{'ENST00000433206.6': 74}	{'ENST00000433206.6': 'chr17'}	{'ENST00000433206.6': 38898519.0}	{'ENST00000433206.6': 38914324.0}	{'ENST00000433206.6': '+'}	ENST00000433206.6	Intron	protein_coding	74	chr17	38898519	38914324	+	['ENST00000433206.6']	[]	ENST00000433206.6	Intron	protein_coding	74	chr17	38898519	38914324	+	[]	[]	ENST00000433206.6	Intron	protein_coding	74	chr17	38898519	38914324	+	ENST00000433206.6	Intron	protein_coding	74	chr17	38898519	38914324	+
Merged-chr17-40074560-1	chr17	40074523	40074597	+	0	{'ENST00000394121.8': 'Intron'}	{'ENST00000394121.8': 'protein_coding'}	{'ENST00000394121.8': 57}	{'ENST00000394121.8': 'chr17'}	{'ENST00000394121.8': 40074541.0}	{'ENST00000394121.8': 40076870.0}	{'ENST00000394121.8': '+'}	ENST00000394121.8	Intron	protein_coding	57	chr17	40074541	40076870	+	['ENST00000394121.8']	[]	ENST00000394121.8	Intron	protein_coding	57	chr17	40074541	40076870	+	[]	[]	ENST00000394121.8	Intron	protein_coding	57	chr17	40074541	40076870	+	ENST00000394121.8	Intron	protein_coding	57	chr17	40074541	40076870	+
Merged-chr17-44200051-1	chr17	44200014	44200088	-	0	{'ENST00000689614.1': 'Intron', 'ENST00000586560.1': 'Intron'}	{'ENST00000689614.1': 'lncRNA', 'ENST00000586560.1': 'lncRNA'}	{'ENST00000689614.1': 74, 'ENST00000586560.1': 74}	{'ENST00000689614.1': 'chr17', 'ENST00000586560.1': 'chr17'}	{'ENST00000689614.1': 44198930.0, 'ENST00000586560.1': 44198934.0}	{'ENST00000689614.1': 44200619.0, 'ENST00000586560.1': 44216090.0}	{'ENST00000689614.1': '+', 'ENST00000586560.1': '+'}	ENST00000586560.1	Intron	lncRNA	74	chr17	44198934	44216090	+	['ENST00000689614.1', 'ENST00000586560.1']	[]	ENST00000586560.1	Intron	lncRNA	74	chr17	44198934	44216090	+	[]	[]	ENST00000586560.1	Intron	lncRNA	74	chr17	44198934	44216090	+	ENST00000586560.1	Intron	lncRNA	74	chr17	44198934	44216090	+
Merged-chr4-150102598-1	chr4	150102561	150102635	+	0	{'ENST00000296550.12': 'exon'}	{'ENST00000296550.12': 'protein_coding'}	{'ENST00000296550.12': 74}	{'ENST00000296550.12': 'chr4'}	{'ENST00000296550.12': 150102478.0}	{'ENST00000296550.12': 150102812.0}	{'ENST00000296550.12': '+'}	ENST00000296550.12	exon	protein_coding	74	chr4	150102478	150102812	+	['ENST00000296550.12']	['ENST00000296550.12']	ENST00000296550.12	exon	protein_coding	74	chr4	150102478	150102812	+	[]	[]	ENST00000296550.12	exon	protein_coding	74	chr4	150102478	150102812	+	ENST00000296550.12	exon	protein_coding	74	chr4	150102478	150102812	+
Merged-chr4-152352520-1	chr4	152352483	152352557	-	0	{'ENST00000393956.9': 'CDS', 'ENST00000296555.11': 'Intron', 'ENST00000603548.6': 'Intron'}	{'ENST00000393956.9': 'protein_coding', 'ENST00000296555.11': 'protein_coding', 'ENST00000603548.6': 'protein_coding'}	{'ENST00000393956.9': 74, 'ENST00000296555.11': 74, 'ENST00000603548.6': 74}	{'ENST00000393956.9': 'chr4', 'ENST00000296555.11': 'chr4', 'ENST00000603548.6': 'chr4'}	{'ENST00000393956.9': 152352470.0, 'ENST00000296555.11': 152350124.0, 'ENST00000603548.6': 152350124.0}	{'ENST00000393956.9': 152352730.0, 'ENST00000296555.11': 152382188.0, 'ENST00000603548.6': 152411302.0}	{'ENST00000393956.9': '-', 'ENST00000296555.11': '-', 'ENST00000603548.6': '-'}	ENST00000393956.9	CDS	protein_coding	74	chr4	152352470	152352730	-	['ENST00000393956.9', 'ENST00000296555.11', 'ENST00000603548.6']	[]	ENST00000393956.9	CDS	protein_coding	74	chr4	152352470	152352730	-	[]	[]	ENST00000393956.9	CDS	protein_coding	74	chr4	152352470	152352730	-	ENST00000393956.9	CDS	protein_coding	74	chr4	152352470	152352730	-
Merged-chr4-161011284-1	chr4	161011247	161011321	+	0	{'Intergenic': 'Unlabeled'}	{'Intergenic': 'Intergenic'}	{'Intergenic': 0}	{'Intergenic': nan}	{'Intergenic': nan}	{'Intergenic': nan}	{'Intergenic': '+'}	Intergenic	Unlabeled	Intergenic	0				+	['Intergenic']	[]	Intergenic	Unlabeled	Intergenic	0				+	[]	[]	Intergenic	Unlabeled	Intergenic	0				+	Intergenic	Unlabeled	Intergenic	0				+
Merged-chr4-182449095-1	chr4	182449058	182449132	+	0	{'ENST00000511685.6': 'Intron'}	{'ENST00000511685.6': 'protein_coding'}	{'ENST00000511685.6': 74}	{'ENST00000511685.6': 'chr4'}	{'ENST00000511685.6': 182346929.0}	{'ENST00000511685.6': 182600923.0}	{'ENST00000511685.6': '+'}	ENST00000511685.6	Intron	protein_coding	74	chr4	182346929	182600923	+	['ENST00000511685.6']	['ENST00000511685.6']	ENST00000511685.6	Intron	protein_coding	74	chr4	182346929	182600923	+	[]	[]	ENST00000511685.6	Intron	protein_coding	74	chr4	182346929	182600923	+	ENST00000511685.6	Intron	protein_coding	74	chr4	182346929	182600923	+
Merged-chr17-46028311-1	chr17	46028274	46028348	+	0	{'ENST00000262410.10': '3UTR'}	{'ENST00000262410.10': 'protein_coding'}	{'ENST00000262410.10': 60}	{'ENST00000262410.10': 'chr17'}	{'ENST00000262410.10': 46024169.0}	{'ENST00000262410.10': 46028334.0}	{'ENST00000262410.10': '+'}	ENST00000262410.10	3UTR	protein_coding	60	chr17	46024169	46028334	+	['ENST00000262410.10']	['ENST00000262410.10']	ENST00000262410.10	3UTR	protein_coding	60	chr17	46024169	46028334	+	[]	['ENST00000262410.10']	ENST00000262410.10	3UTR	protein_coding	60	chr17	46024169	46028334	+	ENST00000262410.10	3UTR	protein_coding	60	chr17	46024169	46028334	+
Merged-chr17-46869417-1	chr17	46869380	46869454	+	0	{'ENST00000290015.7': 'Intron'}	{'ENST00000290015.7': 'protein_coding'}	{'ENST00000290015.7': 74}	{'ENST00000290015.7': 'chr17'}	{'ENST00000290015.7': 46851715.0}	{'ENST00000290015.7': 46872516.0}	{'ENST00000290015.7': '+'}	ENST00000290015.7	Intron	protein_coding	74	chr17	46851715	46872516	+	['ENST00000290015.7']	['ENST00000290015.7']	ENST00000290015.7	Intron	protein_coding	74	chr17	46851715	46872516	+	[]	[]	ENST00000290015.7	Intron	protein_coding	74	chr17	46851715	46872516	+	ENST00000290015.7	Intron	protein_coding	74	chr17	46851715	46872516	+
Merged-chr17-50693199-1	chr17	50693162	50693236	-	0	{'ENST00000285243.7': '3UTR'}	{'ENST00000285243.7': 'protein_coding'}	{'ENST00000285243.7': 39}	{'ENST00000285243.7': 'chr17'}	{'ENST00000285243.7': 50693198.0}	{'ENST00000285243.7': 50695999.0}	{'ENST00000285243.7': '-'}	ENST00000285243.7	3UTR	protein_coding	39	chr17	50693198	50695999	-	['ENST00000285243.7']	['ENST00000285243.7']	ENST00000285243.7	3UTR	protein_coding	39	chr17	50693198	50695999	-	[]	['ENST00000285243.7']	ENST00000285243.7	3UTR	protein_coding	39	chr17	50693198	50695999	-	ENST00000285243.7	3UTR	protein_coding	39	chr17	50693198	50695999	-
Merged-chr17-55174925-1	chr17	55174888	55174962	+	0	{'Intergenic': 'Unlabeled'}	{'Intergenic': 'Intergenic'}	{'Intergenic': 0}	{'Intergenic': nan}	{'Intergenic': nan}	{'Intergenic': nan}	{'Intergenic': '+'}	Intergenic	Unlabeled	Intergenic	0				+	['Intergenic']	[]	Intergenic	Unlabeled	Intergenic	0				+	[]	[]	Intergenic	Unlabeled	Intergenic	0				+	Intergenic	Unlabeled	Intergenic	0				+
Merged-chr17-57262201-1	chr17	57262164	57262238	+	0	{'ENST00000416426.6': 'Intron'}	{'ENST00000416426.6': 'protein_coding'}	{'ENST00000416426.6': 47}	{'ENST00000416426.6': 'chr17'}	{'ENST00000416426.6': 57262192.0}	{'ENST00000416426.6': 57401378.0}	{'ENST00000416426.6': '+'}	ENST00000416426.6	Intron	protein_coding	47	chr17	57262192	57401378	+	['ENST00000416426.6']	[]	ENST00000416426.6	Intron	protein_coding	47	chr17	57262192	57401378	+	[]	[]	ENST00000416426.6	Intron	protein_coding	47	chr17	57262192	57401378	+	ENST00000416426.6	Intron	protein_coding	47	chr17	57262192	57401378	+
Merged-chr4-182763466-1	chr4	182763429	182763503	+	0	{'ENST00000511685.6': 'Intron'}	{'ENST00000511685.6': 'protein_coding'}	{'ENST00000511685.6': 74}	{'ENST00000511685.6': 'chr4'}	{'ENST00000511685.6': 182755259.0}	{'ENST00000511685.6': 182773471.0}	{'ENST00000511685.6': '+'}	ENST00000511685.6	Intron	protein_coding	74	chr4	182755259	182773471	+	['ENST00000511685.6']	['ENST00000511685.6']	ENST00000511685.6	Intron	protein_coding	74	chr4	182755259	182773471	+	[]	[]	ENST00000511685.6	Intron	protein_coding	74	chr4	182755259	182773471	+	ENST00000511685.6	Intron	protein_coding	74	chr4	182755259	182773471	+
Merged-chr4-184023375-1	chr4	184023338	184023412	+	0	{'ENST00000308497.9': '3UTR'}	{'ENST00000308497.9': 'protein_coding'}	{'ENST00000308497.9': 74}	{'ENST00000308497.9': 'chr4'}	{'ENST00000308497.9': 184017282.0}	{'ENST00000308497.9': 184023526.0}	{'ENST00000308497.9': '+'}	ENST00000308497.9	3UTR	protein_coding	74	chr4	184017282	184023526	+	['ENST00000308497.9']	['ENST00000308497.9']	ENST00000308497.9	3UTR	protein_coding	74	chr4	184017282	184023526	+	[]	['ENST00000308497.9']	ENST00000308497.9	3UTR	protein_coding	74	chr4	184017282	184023526	+	ENST00000308497.9	3UTR	protein_coding	74	chr4	184017282	184023526	+
Merged-chr4-184418636-1	chr4	184418599	184418673	-	0	{'ENST00000696840.1': 'exon'}	{'ENST00000696840.1': 'protein_coding'}	{'ENST00000696840.1': 74}	{'ENST00000696840.1': 'chr4'}	{'ENST00000696840.1': 184418532.0}	{'ENST00000696840.1': 184418708.0}	{'ENST00000696840.1': '-'}	ENST00000696840.1	exon	protein_coding	74	chr4	184418532	184418708	-	['ENST00000696840.1']	[]	ENST00000696840.1	exon	protein_coding	74	chr4	184418532	184418708	-	[]	[]	ENST00000696840.1	exon	protein_coding	74	chr4	184418532	184418708	-	ENST00000696840.1	exon	protein_coding	74	chr4	184418532	184418708	-
Merged-chr17-59155825-1	chr17	59155788	59155862	+	0	{'ENST00000614081.1': 'exon', 'ENST00000262293.9': 'Intron'}	{'ENST00000614081.1': 'protein_coding', 'ENST00000262293.9': 'protein_coding'}	{'ENST00000614081.1': 17, 'ENST00000262293.9': 58}	{'ENST00000614081.1': 'chr17', 'ENST00000262293.9': 'chr17'}	{'ENST00000614081.1': 59155757.0, 'ENST00000262293.9': 59155805.0}	{'ENST00000614081.1': 59155805.0, 'ENST00000262293.9': 59169747.0}	{'ENST00000614081.1': '+', 'ENST00000262293.9': '+'}	ENST00000262293.9	Intron	protein_coding	58	chr17	59155805	59169747	+	['ENST00000614081.1', 'ENST00000262293.9']	['ENST00000262293.9']	ENST00000262293.9	Intron	protein_coding	58	chr17	59155805	59169747	+	[]	[]	ENST00000262293.9	Intron	protein_coding	58	chr17	59155805	59169747	+	ENST00000262293.9	Intron	protein_coding	58	chr17	59155805	59169747	+
Merged-chr17-59566674-1	chr17	59566637	59566711	+	0	{'ENST00000251241.9': 'exon', 'ENST00000425628.7': 'Intron'}	{'ENST00000251241.9': 'protein_coding', 'ENST00000425628.7': 'protein_coding'}	{'ENST00000251241.9': 74, 'ENST00000425628.7': 3}	{'ENST00000251241.9': 'chr17', 'ENST00000425628.7': 'chr17'}	{'ENST00000251241.9': 59566627.0, 'ENST00000425628.7': 59566709.0}	{'ENST00000251241.9': 59566794.0, 'ENST00000425628.7': 59573115.0}	{'ENST00000251241.9': '+', 'ENST00000425628.7': '+'}	ENST00000251241.9	exon	protein_coding	74	chr17	59566627	59566794	+	['ENST00000251241.9', 'ENST00000425628.7']	['ENST00000251241.9']	ENST00000251241.9	exon	protein_coding	74	chr17	59566627	59566794	+	[]	[]	ENST00000251241.9	exon	protein_coding	74	chr17	59566627	59566794	+	ENST00000251241.9	exon	protein_coding	74	chr17	59566627	59566794	+
Merged-chr17-64963336-1	chr17	64963299	64963373	-	0	{'Intergenic': 'Unlabeled'}	{'Intergenic': 'Intergenic'}	{'Intergenic': 0}	{'Intergenic': nan}	{'Intergenic': nan}	{'Intergenic': nan}	{'Intergenic': '-'}	Intergenic	Unlabeled	Intergenic	0				-	['Intergenic']	[]	Intergenic	Unlabeled	Intergenic	0				-	[]	[]	Intergenic	Unlabeled	Intergenic	0				-	Intergenic	Unlabeled	Intergenic	0				-
Merged-chr17-67340518-1	chr17	67340481	67340555	-	0	{'ENST00000357146.4': '3UTR', 'ENST00000356126.8': '3UTR'}	{'ENST00000357146.4': 'protein_coding', 'ENST00000356126.8': 'protein_coding'}	{'ENST00000357146.4': 74, 'ENST00000356126.8': 74}	{'ENST00000357146.4': 'chr17', 'ENST00000356126.8': 'chr17'}	{'ENST00000357146.4': 67339803.0, 'ENST00000356126.8': 67337916.0}	{'ENST00000357146.4': 67340845.0, 'ENST00000356126.8': 67340845.0}	{'ENST00000357146.4': '-', 'ENST00000356126.8': '-'}	ENST00000357146.4	3UTR	protein_coding	74	chr17	67339803	67340845	-	['ENST00000357146.4', 'ENST00000356126.8']	['ENST00000356126.8']	ENST00000356126.8	3UTR	protein_coding	74	chr17	67337916	67340845	-	[]	['ENST00000357146.4', 'ENST00000356126.8']	ENST00000357146.4	3UTR	protein_coding	74	chr17	67339803	67340845	-	ENST00000356126.8	3UTR	protein_coding	74	chr17	67337916	67340845	-
Merged-chr17-73283639-1	chr17	73283602	73283676	-	0	{'ENST00000335793.4': 'exon', 'ENST00000439510.2': 'exon'}	{'ENST00000335793.4': 'protein_coding', 'ENST00000439510.2': 'protein_coding'}	{'ENST00000335793.4': 53, 'ENST00000439510.2': 52}	{'ENST00000335793.4': 'chr17', 'ENST00000439510.2': 'chr17'}	{'ENST00000335793.4': 73283624.0, 'ENST00000439510.2': 73283625.0}	{'ENST00000335793.4': 73286612.0, 'ENST00000439510.2': 73286122.0}	{'ENST00000335793.4': '-', 'ENST00000439510.2': '-'}	ENST00000335793.4	exon	protein_coding	53	chr17	73283624	73286612	-	['ENST00000335793.4', 'ENST00000439510.2']	['ENST00000335793.4']	ENST00000335793.4	exon	protein_coding	53	chr17	73283624	73286612	-	[]	[]	ENST00000335793.4	exon	protein_coding	53	chr17	73283624	73286612	-	ENST00000335793.4	exon	protein_coding	53	chr17	73283624	73286612	-
Merged-chr17-75040105-1	chr17	75040068	75040142	-	0	{'ENST00000301587.9': 'Intron', 'ENST00000344546.8': 'Intron', 'ENST00000581589.5': 'Intron'}	{'ENST00000301587.9': 'protein_coding', 'ENST00000344546.8': 'protein_coding', 'ENST00000581589.5': 'protein_coding'}	{'ENST00000301587.9': 23, 'ENST00000344546.8': 74, 'ENST00000581589.5': 74}	{'ENST00000301587.9': 'chr17', 'ENST00000344546.8': 'chr17', 'ENST00000581589.5': 'chr17'}	{'ENST00000301587.9': 75039271.0, 'ENST00000344546.8': 75039271.0, 'ENST00000581589.5': 75035357.0}	{'ENST00000301587.9': 75040091.0, 'ENST00000344546.8': 75042180.0, 'ENST00000581589.5': 75049219.0}	{'ENST00000301587.9': '-', 'ENST00000344546.8': '-', 'ENST00000581589.5': '+'}	ENST00000344546.8	Intron	protein_coding	74	chr17	75039271	75042180	-	['ENST00000301587.9', 'ENST00000344546.8', 'ENST00000581589.5']	['ENST00000301587.9']	ENST00000301587.9	Intron	protein_coding	23	chr17	75039271	75040091	-	[]	[]	ENST00000301587.9	Intron	protein_coding	23	chr17	75039271	75040091	-	ENST00000301587.9	Intron	protein_coding	23	chr17	75039271	75040091	-
Merged-chr17-75388718-1	chr17	75388681	75388755	-	0	{'ENST00000392563.5': 'Intron'}	{'ENST00000392563.5': 'protein_coding'}	{'ENST00000392563.5': 74}	{'ENST00000392563.5': 'chr17'}	{'ENST00000392563.5': 75332797.0}	{'ENST00000392563.5': 75393550.0}	{'ENST00000392563.5': '-'}	ENST00000392563.5	Intron	protein_coding	74	chr17	75332797	75393550	-	['ENST00000392563.5']	[]	ENST00000392563.5	Intron	protein_coding	74	chr17	75332797	75393550	-	[]	[]	ENST00000392563.5	Intron	protein_coding	74	chr17	75332797	75393550	-	ENST00000392563.5	Intron	protein_coding	74	chr17	75332797	75393550	-
Merged-chr17-75942962-1	chr17	75942925	75942999	-	0	{'ENST00000293217.10': '3UTR'}	{'ENST00000293217.10': 'protein_coding'}	{'ENST00000293217.10': 74}	{'ENST00000293217.10': 'chr17'}	{'ENST00000293217.10': 75941507.0}	{'ENST00000293217.10': 75946750.0}	{'ENST00000293217.10': '-'}	ENST00000293217.10	3UTR	protein_coding	74	chr17	75941507	75946750	-	['ENST00000293217.10']	['ENST00000293217.10']	ENST00000293217.10	3UTR	protein_coding	74	chr17	75941507	75946750	-	[]	['ENST00000293217.10']	ENST00000293217.10	3UTR	protein_coding	74	chr17	75941507	75946750	-	ENST00000293217.10	3UTR	protein_coding	74	chr17	75941507	75946750	-
Merged-chr17-78422563-1	chr17	78422526	78422600	+	0	{'ENST00000262764.11': 'Intron'}	{'ENST00000262764.11': 'protein_coding'}	{'ENST00000262764.11': 74}	{'ENST00000262764.11': 'chr17'}	{'ENST00000262764.11': 78419675.0}	{'ENST00000262764.11': 78424060.0}	{'ENST00000262764.11': '+'}	ENST00000262764.11	Intron	protein_coding	74	chr17	78419675	78424060	+	['ENST00000262764.11']	['ENST00000262764.11']	ENST00000262764.11	Intron	protein_coding	74	chr17	78419675	78424060	+	[]	[]	ENST00000262764.11	Intron	protein_coding	74	chr17	78419675	78424060	+	ENST00000262764.11	Intron	protein_coding	74	chr17	78419675	78424060	+
Merged-chr17-78588062-1	chr17	78588025	78588099	+	0	{'Intergenic': 'Unlabeled'}	{'Intergenic': 'Intergenic'}	{'Intergenic': 0}	{'Intergenic': nan}	{'Intergenic': nan}	{'Intergenic': nan}	{'Intergenic': '+'}	Intergenic	Unlabeled	Intergenic	0				+	['Intergenic']	[]	Intergenic	Unlabeled	Intergenic	0				+	[]	[]	Intergenic	Unlabeled	Intergenic	0				+	Intergenic	Unlabeled	Intergenic	0				+
Merged-chr17-78870915-1	chr17	78870878	78870952	-	0	{'ENST00000585421.5': 'Intron'}	{'ENST00000585421.5': 'protein_coding'}	{'ENST00000585421.5': 19}	{'ENST00000585421.5': 'chr17'}	{'ENST00000585421.5': 78857646.0}	{'ENST00000585421.5': 78870897.0}	{'ENST00000585421.5': '-'}	ENST00000585421.5	Intron	protein_coding	19	chr17	78857646	78870897	-	['ENST00000585421.5']	[]	ENST00000585421.5	Intron	protein_coding	19	chr17	78857646	78870897	-	[]	[]	ENST00000585421.5	Intron	protein_coding	19	chr17	78857646	78870897	-	ENST00000585421.5	Intron	protein_coding	19	chr17	78857646	78870897	-
Merged-chr17-79833175-1	chr17	79833138	79833212	-	0	{'ENST00000269397.9': '3UTR'}	{'ENST00000269397.9': 'protein_coding'}	{'ENST00000269397.9': 57}	{'ENST00000269397.9': 'chr17'}	{'ENST00000269397.9': 79833156.0}	{'ENST00000269397.9': 79833961.0}	{'ENST00000269397.9': '-'}	ENST00000269397.9	3UTR	protein_coding	57	chr17	79833156	79833961	-	['ENST00000269397.9']	['ENST00000269397.9']	ENST00000269397.9	3UTR	protein_coding	57	chr17	79833156	79833961	-	[]	['ENST00000269397.9']	ENST00000269397.9	3UTR	protein_coding	57	chr17	79833156	79833961	-	ENST00000269397.9	3UTR	protein_coding	57	chr17	79833156	79833961	-
Merged-chr17-79940310-1	chr17	79940273	79940347	-	0	{'ENST00000340848.11': '3UTR', 'ENST00000310924.7': '3UTR', 'ENST00000576768.5': '3UTR'}	{'ENST00000340848.11': 'protein_coding', 'ENST00000310924.7': 'protein_coding', 'ENST00000576768.5': 'protein_coding'}	{'ENST00000340848.11': 74, 'ENST00000310924.7': 74, 'ENST00000576768.5': 74}	{'ENST00000340848.11': 'chr17', 'ENST00000310924.7': 'chr17', 'ENST00000576768.5': 'chr17'}	{'ENST00000340848.11': 79937908.0, 'ENST00000310924.7': 79932343.0, 'ENST00000576768.5': 79935792.0}	{'ENST00000340848.11': 79940861.0, 'ENST00000310924.7': 79940861.0, 'ENST00000576768.5': 79940861.0}	{'ENST00000340848.11': '-', 'ENST00000310924.7': '-', 'ENST00000576768.5': '-'}	ENST00000340848.11	3UTR	protein_coding	74	chr17	79937908	79940861	-	['ENST00000340848.11', 'ENST00000310924.7', 'ENST00000576768.5']	['ENST00000310924.7']	ENST00000310924.7	3UTR	protein_coding	74	chr17	79932343	79940861	-	[]	['ENST00000340848.11', 'ENST00000310924.7', 'ENST00000576768.5']	ENST00000340848.11	3UTR	protein_coding	74	chr17	79937908	79940861	-	ENST00000310924.7	3UTR	protein_coding	74	chr17	79932343	79940861	-
Merged-chr12-124402490-1	chr12	124402453	124402527	-	0	{'ENST00000404621.5': 'exon'}	{'ENST00000404621.5': 'protein_coding'}	{'ENST00000404621.5': 74}	{'ENST00000404621.5': 'chr12'}	{'ENST00000404621.5': 124402404.0}	{'ENST00000404621.5': 124402561.0}	{'ENST00000404621.5': '-'}	ENST00000404621.5	exon	protein_coding	74	chr12	124402404	124402561	-	['ENST00000404621.5']	[]	ENST00000404621.5	exon	protein_coding	74	chr12	124402404	124402561	-	[]	[]	ENST00000404621.5	exon	protein_coding	74	chr12	124402404	124402561	-	ENST00000404621.5	exon	protein_coding	74	chr12	124402404	124402561	-
Merged-chr12-50479990-1	chr12	50479953	50480027	+	0	{'ENST00000293618.12': '3UTR', 'ENST00000398473.7': '3UTR'}	{'ENST00000293618.12': 'protein_coding', 'ENST00000398473.7': 'protein_coding'}	{'ENST00000293618.12': 43, 'ENST00000398473.7': 51}	{'ENST00000293618.12': 'chr12', 'ENST00000398473.7': 'chr12'}	{'ENST00000293618.12': 50475862.0, 'ENST00000398473.7': 50475862.0}	{'ENST00000293618.12': 50479996.0, 'ENST00000398473.7': 50480004.0}	{'ENST00000293618.12': '+', 'ENST00000398473.7': '+'}	ENST00000398473.7	3UTR	protein_coding	51	chr12	50475862	50480004	+	['ENST00000293618.12', 'ENST00000398473.7']	['ENST00000398473.7']	ENST00000398473.7	3UTR	protein_coding	51	chr12	50475862	50480004	+	[]	['ENST00000293618.12', 'ENST00000398473.7']	ENST00000398473.7	3UTR	protein_coding	51	chr12	50475862	50480004	+	ENST00000398473.7	3UTR	protein_coding	51	chr12	50475862	50480004	+
Merged-chr12-13000045-1	chr12	13000008	13000082	-	0	{'ENST00000014930.9': 'Intron'}	{'ENST00000014930.9': 'protein_coding'}	{'ENST00000014930.9': 28}	{'ENST00000014930.9': 'chr12'}	{'ENST00000014930.9': 12989415.0}	{'ENST00000014930.9': 13000036.0}	{'ENST00000014930.9': '-'}	ENST00000014930.9	Intron	protein_coding	28	chr12	12989415	13000036	-	['ENST00000014930.9']	['ENST00000014930.9']	ENST00000014930.9	Intron	protein_coding	28	chr12	12989415	13000036	-	[]	[]	ENST00000014930.9	Intron	protein_coding	28	chr12	12989415	13000036	-	ENST00000014930.9	Intron	protein_coding	28	chr12	12989415	13000036	-
Merged-chr19-3465060-1	chr19	3465023	3465097	+	0	{'ENST00000641145.1': '3UTR'}	{'ENST00000641145.1': 'protein_coding'}	{'ENST00000641145.1': 74}	{'ENST00000641145.1': 'chr19'}	{'ENST00000641145.1': 3462767.0}	{'ENST00000641145.1': 3469217.0}	{'ENST00000641145.1': '+'}	ENST00000641145.1	3UTR	protein_coding	74	chr19	3462767	3469217	+	['ENST00000641145.1']	[]	ENST00000641145.1	3UTR	protein_coding	74	chr19	3462767	3469217	+	[]	['ENST00000641145.1']	ENST00000641145.1	3UTR	protein_coding	74	chr19	3462767	3469217	+	ENST00000641145.1	3UTR	protein_coding	74	chr19	3462767	3469217	+
Merged-chr19-4445023-1	chr19	4444986	4445060	-	0	{'ENST00000301281.11': '3UTR', 'ENST00000394765.7': '3UTR'}	{'ENST00000301281.11': 'protein_coding', 'ENST00000394765.7': 'protein_coding'}	{'ENST00000301281.11': 55, 'ENST00000394765.7': 51}	{'ENST00000301281.11': 'chr19', 'ENST00000394765.7': 'chr19'}	{'ENST00000301281.11': 4445006.0, 'ENST00000394765.7': 4445010.0}	{'ENST00000301281.11': 4445500.0, 'ENST00000394765.7': 4445500.0}	{'ENST00000301281.11': '-', 'ENST00000394765.7': '-'}	ENST00000301281.11	3UTR	protein_coding	55	chr19	4445006	4445500	-	['ENST00000301281.11', 'ENST00000394765.7']	['ENST00000301281.11']	ENST00000301281.11	3UTR	protein_coding	55	chr19	4445006	4445500	-	[]	['ENST00000301281.11', 'ENST00000394765.7']	ENST00000301281.11	3UTR	protein_coding	55	chr19	4445006	4445500	-	ENST00000301281.11	3UTR	protein_coding	55	chr19	4445006	4445500	-
Merged-chr19-5256046-1	chr19	5256009	5256083	-	0	{'ENST00000262963.11': 'Intron', 'ENST00000588012.5': 'Intron'}	{'ENST00000262963.11': 'protein_coding', 'ENST00000588012.5': 'protein_coding'}	{'ENST00000262963.11': 74, 'ENST00000588012.5': 74}	{'ENST00000262963.11': 'chr19', 'ENST00000588012.5': 'chr19'}	{'ENST00000262963.11': 5246045.0, 'ENST00000588012.5': 5246045.0}	{'ENST00000262963.11': 5256107.0, 'ENST00000588012.5': 5258016.0}	{'ENST00000262963.11': '-', 'ENST00000588012.5': '-'}	ENST00000262963.11	Intron	protein_coding	74	chr19	5246045	5256107	-	['ENST00000262963.11', 'ENST00000588012.5']	['ENST00000262963.11']	ENST00000262963.11	Intron	protein_coding	74	chr19	5246045	5256107	-	[]	[]	ENST00000262963.11	Intron	protein_coding	74	chr19	5246045	5256107	-	ENST00000262963.11	Intron	protein_coding	74	chr19	5246045	5256107	-
Merged-chr19-12899976-1	chr19	12899939	12900013	+	0	{'ENST00000591470.5': '3UTR', 'ENST00000222214.10': '3UTR', 'ENST00000293695.8': 'Intron'}	{'ENST00000591470.5': 'protein_coding', 'ENST00000222214.10': 'protein_coding', 'ENST00000293695.8': 'protein_coding'}	{'ENST00000591470.5': 7, 'ENST00000222214.10': 60, 'ENST00000293695.8': 64}	{'ENST00000591470.5': 'chr19', 'ENST00000222214.10': 'chr19', 'ENST00000293695.8': 'chr19'}	{'ENST00000591470.5': 12899539.0, 'ENST00000222214.10': 12899539.0, 'ENST00000293695.8': 12899385.0}	{'ENST00000591470.5': 12899946.0, 'ENST00000222214.10': 12899999.0, 'ENST00000293695.8': 12900003.0}	{'ENST00000591470.5': '+', 'ENST00000222214.10': '+', 'ENST00000293695.8': '-'}	ENST00000293695.8	Intron	protein_coding	64	chr19	12899385	12900003	-	['ENST00000591470.5', 'ENST00000222214.10', 'ENST00000293695.8']	['ENST00000222214.10', 'ENST00000293695.8']	ENST00000293695.8	Intron	protein_coding	64	chr19	12899385	12900003	-	[]	['ENST00000591470.5', 'ENST00000222214.10']	ENST00000222214.10	3UTR	protein_coding	60	chr19	12899539	12899999	+	ENST00000293695.8	Intron	protein_coding	64	chr19	12899385	12900003	-
Merged-chr6-110834857-1	chr6	110834820	110834894	+	0	{'Intergenic': 'Unlabeled'}	{'Intergenic': 'Intergenic'}	{'Intergenic': 0}	{'Intergenic': nan}	{'Intergenic': nan}	{'Intergenic': nan}	{'Intergenic': '+'}	Intergenic	Unlabeled	Intergenic	0				+	['Intergenic']	[]	Intergenic	Unlabeled	Intergenic	0				+	[]	[]	Intergenic	Unlabeled	Intergenic	0				+	Intergenic	Unlabeled	Intergenic	0				+
Merged-chr6-111506519-1	chr6	111506482	111506556	-	0	{'ENST00000661805.1': 'exon', 'ENST00000702563.1': 'Intron'}	{'ENST00000661805.1': 'lncRNA', 'ENST00000702563.1': 'lncRNA'}	{'ENST00000661805.1': 74, 'ENST00000702563.1': 74}	{'ENST00000661805.1': 'chr6', 'ENST00000702563.1': 'chr6'}	{'ENST00000661805.1': 111505307.0, 'ENST00000702563.1': 111483665.0}	{'ENST00000661805.1': 111507051.0, 'ENST00000702563.1': 111574620.0}	{'ENST00000661805.1': '-', 'ENST00000702563.1': '+'}	ENST00000661805.1	exon	lncRNA	74	chr6	111505307	111507051	-	['ENST00000661805.1', 'ENST00000702563.1']	[]	ENST00000661805.1	exon	lncRNA	74	chr6	111505307	111507051	-	[]	[]	ENST00000661805.1	exon	lncRNA	74	chr6	111505307	111507051	-	ENST00000661805.1	exon	lncRNA	74	chr6	111505307	111507051	-
Merged-chr6-113950487-1	chr6	113950450	113950524	-	0	{'ENST00000519065.6': 'Intron'}	{'ENST00000519065.6': 'protein_coding'}	{'ENST00000519065.6': 74}	{'ENST00000519065.6': 'chr6'}	{'ENST00000519065.6': 113949260.0}	{'ENST00000519065.6': 113953276.0}	{'ENST00000519065.6': '-'}	ENST00000519065.6	Intron	protein_coding	74	chr6	113949260	113953276	-	['ENST00000519065.6']	['ENST00000519065.6']	ENST00000519065.6	Intron	protein_coding	74	chr6	113949260	113953276	-	[]	[]	ENST00000519065.6	Intron	protein_coding	74	chr6	113949260	113953276	-	ENST00000519065.6	Intron	protein_coding	74	chr6	113949260	113953276	-
Merged-chr6-116253663-1	chr6	116253626	116253700	-	0	{'ENST00000420283.3': 'CDS'}	{'ENST00000420283.3': 'protein_coding'}	{'ENST00000420283.3': 74}	{'ENST00000420283.3': 'chr6'}	{'ENST00000420283.3': 116252767.0}	{'ENST00000420283.3': 116254008.0}	{'ENST00000420283.3': '-'}	ENST00000420283.3	CDS	protein_coding	74	chr6	116252767	116254008	-	['ENST00000420283.3']	['ENST00000420283.3']	ENST00000420283.3	CDS	protein_coding	74	chr6	116252767	116254008	-	[]	[]	ENST00000420283.3	CDS	protein_coding	74	chr6	116252767	116254008	-	ENST00000420283.3	CDS	protein_coding	74	chr6	116252767	116254008	-
Merged-chr6-121090072-1	chr6	121090035	121090109	-	0	{'ENST00000275159.11': 'Intron'}	{'ENST00000275159.11': 'protein_coding'}	{'ENST00000275159.11': 74}	{'ENST00000275159.11': 'chr6'}	{'ENST00000275159.11': 121080890.0}	{'ENST00000275159.11': 121090852.0}	{'ENST00000275159.11': '-'}	ENST00000275159.11	Intron	protein_coding	74	chr6	121080890	121090852	-	['ENST00000275159.11']	[]	ENST00000275159.11	Intron	protein_coding	74	chr6	121080890	121090852	-	[]	[]	ENST00000275159.11	Intron	protein_coding	74	chr6	121080890	121090852	-	ENST00000275159.11	Intron	protein_coding	74	chr6	121080890	121090852	-
Merged-chr19-12922566-1	chr19	12922529	12922603	-	0	{'ENST00000314606.9': '3UTR', 'ENST00000423140.6': '3UTR'}	{'ENST00000314606.9': 'protein_coding', 'ENST00000423140.6': 'protein_coding'}	{'ENST00000314606.9': 74, 'ENST00000423140.6': 74}	{'ENST00000314606.9': 'chr19', 'ENST00000423140.6': 'chr19'}	{'ENST00000314606.9': 12922479.0, 'ENST00000423140.6': 12922480.0}	{'ENST00000314606.9': 12922750.0, 'ENST00000423140.6': 12922750.0}	{'ENST00000314606.9': '-', 'ENST00000423140.6': '-'}	ENST00000423140.6	3UTR	protein_coding	74	chr19	12922480	12922750	-	['ENST00000314606.9', 'ENST00000423140.6']	['ENST00000314606.9']	ENST00000314606.9	3UTR	protein_coding	74	chr19	12922479	12922750	-	[]	['ENST00000314606.9', 'ENST00000423140.6']	ENST00000314606.9	3UTR	protein_coding	74	chr19	12922479	12922750	-	ENST00000314606.9	3UTR	protein_coding	74	chr19	12922479	12922750	-
Merged-chr19-13832235-1	chr19	13832198	13832272	+	0	{'ENST00000590508.6': '3UTR', 'ENST00000254323.6': '3UTR', 'ENST00000587762.2': 'exon'}	{'ENST00000590508.6': 'protein_coding', 'ENST00000254323.6': 'protein_coding', 'ENST00000587762.2': 'lncRNA'}	{'ENST00000590508.6': 56, 'ENST00000254323.6': 32, 'ENST00000587762.2': 74}	{'ENST00000590508.6': 'chr19', 'ENST00000254323.6': 'chr19', 'ENST00000587762.2': 'chr19'}	{'ENST00000590508.6': 13831048.0, 'ENST00000254323.6': 13831048.0, 'ENST00000587762.2': 13823880.0}	{'ENST00000590508.6': 13832254.0, 'ENST00000254323.6': 13832230.0, 'ENST00000587762.2': 13842928.0}	{'ENST00000590508.6': '+', 'ENST00000254323.6': '+', 'ENST00000587762.2': '-'}	ENST00000587762.2	exon	lncRNA	74	chr19	13823880	13842928	-	['ENST00000590508.6', 'ENST00000254323.6', 'ENST00000587762.2']	['ENST00000590508.6']	ENST00000590508.6	3UTR	protein_coding	56	chr19	13831048	13832254	+	[]	['ENST00000590508.6', 'ENST00000254323.6']	ENST00000590508.6	3UTR	protein_coding	56	chr19	13831048	13832254	+	ENST00000590508.6	3UTR	protein_coding	56	chr19	13831048	13832254	+
Merged-chr19-17323347-1	chr19	17323310	17323384	-	0	{'ENST00000159087.7': '3UTR'}	{'ENST00000159087.7': 'protein_coding'}	{'ENST00000159087.7': 74}	{'ENST00000159087.7': 'chr19'}	{'ENST00000159087.7': 17323223.0}	{'ENST00000159087.7': 17323519.0}	{'ENST00000159087.7': '-'}	ENST00000159087.7	3UTR	protein_coding	74	chr19	17323223	17323519	-	['ENST00000159087.7']	['ENST00000159087.7']	ENST00000159087.7	3UTR	protein_coding	74	chr19	17323223	17323519	-	[]	['ENST00000159087.7']	ENST00000159087.7	3UTR	protein_coding	74	chr19	17323223	17323519	-	ENST00000159087.7	3UTR	protein_coding	74	chr19	17323223	17323519	-
[truncated: 7,366 more rows]
