# Supplementary material for: eIF3 engages with 3’-UTR termini of highly translated mRNAs
Source: bioRxiv preprint, doi:10.1101/2023.11.11.566681, version 4 (2024-11-24)
Supplement: Supplementary File 3 [file 566681_file04.xlsx]

## Sheet: Sheet1
PeakID	Chr	Start	End	Strand	Peak Score	feature_types	type	Overlap_Lens	chrs	starts	stops	strands	closest_ID	closest_feature_types	closest_type	closest_Overlap_Lens	closest_chrs	closest_starts	closest_stops	closest_strands	All_ENSTs	TPM_ENSTs	Filter0_ID	Filter0_Hit_feature_types	Filter0_Hit_type	Filter0_Hit_Overlap_Lens	Filter0_Hit_chrs	Filter0_Hit_starts	Filter0_Hit_ends	Filter0_Hit_strands	5UTR_ENSTS	3UTR_ENSTS	Filter1_Hit	Filter1_Hit_feature_types	Filter1_Hit_type	Filter1_Hit_Overlap_Lens	Filter1_Hit_chrs	Filter1_Hit_starts	Filter1_Hit_stops	Filter1_Hit_strands	Filter2_Hit	Filter2_Hit_feature_types	Filter2_Hit_type	Filter2_Hit_Overlap_Lens	Filter2_Hit_chrs	Filter2_Hit_starts	Filter2_Hit_stops	Filter2_Hit_strands
Merged-chrM-14074-1	chrM	14037	14111	+	0	{'ENST00000361567.2': 'CDS'}	{'ENST00000361567.2': 'protein_coding'}	{'ENST00000361567.2': 74}	{'ENST00000361567.2': 'chrM'}	{'ENST00000361567.2': 12337.0}	{'ENST00000361567.2': 14145.0}	{'ENST00000361567.2': '+'}	ENST00000361567.2	CDS	protein_coding	74	chrM	12337	14145	+	['ENST00000361567.2']	[]	ENST00000361567.2	CDS	protein_coding	74	chrM	12337	14145	+	[]	[]	ENST00000361567.2	CDS	protein_coding	74	chrM	12337	14145	+	ENST00000361567.2	CDS	protein_coding	74	chrM	12337	14145	+
Merged-chrM-15643-1	chrM	15606	15680	+	0	{'ENST00000361789.2': 'exon'}	{'ENST00000361789.2': 'protein_coding'}	{'ENST00000361789.2': 74}	{'ENST00000361789.2': 'chrM'}	{'ENST00000361789.2': 14747.0}	{'ENST00000361789.2': 15887.0}	{'ENST00000361789.2': '+'}	ENST00000361789.2	exon	protein_coding	74	chrM	14747	15887	+	['ENST00000361789.2']	[]	ENST00000361789.2	exon	protein_coding	74	chrM	14747	15887	+	[]	[]	ENST00000361789.2	exon	protein_coding	74	chrM	14747	15887	+	ENST00000361789.2	exon	protein_coding	74	chrM	14747	15887	+
Merged-chr21-8393525-1	chr21	8393488	8393562	+	0	{'ENST00000625598.1': 'exon', 'ENST00000623860.3': 'Intron', 'ENST00000651813.1': 'Intron'}	{'ENST00000625598.1': 'lncRNA', 'ENST00000623860.3': 'lncRNA', 'ENST00000651813.1': 'lncRNA'}	{'ENST00000625598.1': 74, 'ENST00000623860.3': 74, 'ENST00000651813.1': 74}	{'ENST00000625598.1': 'chr21', 'ENST00000623860.3': 'chr21', 'ENST00000651813.1': 'chr21'}	{'ENST00000625598.1': 8393419.0, 'ENST00000623860.3': 8384098.0, 'ENST00000651813.1': 8384098.0}	{'ENST00000625598.1': 8394341.0, 'ENST00000623860.3': 8405959.0, 'ENST00000651813.1': 8450146.0}	{'ENST00000625598.1': '-', 'ENST00000623860.3': '+', 'ENST00000651813.1': '+'}	ENST00000625598.1	exon	lncRNA	74	chr21	8393419	8394341	-	['ENST00000625598.1', 'ENST00000623860.3', 'ENST00000651813.1']	[]	ENST00000625598.1	exon	lncRNA	74	chr21	8393419	8394341	-	[]	[]	ENST00000625598.1	exon	lncRNA	74	chr21	8393419	8394341	-	ENST00000625598.1	exon	lncRNA	74	chr21	8393419	8394341	-
Merged-chr11-11963137-1	chr11	11963100	11963174	-	0	{'ENST00000683431.1': '3UTR', 'ENST00000326932.8': '3UTR', 'ENST00000396505.7': '3UTR'}	{'ENST00000683431.1': 'protein_coding', 'ENST00000326932.8': 'protein_coding', 'ENST00000396505.7': 'protein_coding'}	{'ENST00000683431.1': 74, 'ENST00000326932.8': 69, 'ENST00000396505.7': 74}	{'ENST00000683431.1': 'chr11', 'ENST00000326932.8': 'chr11', 'ENST00000396505.7': 'chr11'}	{'ENST00000683431.1': 11963036.0, 'ENST00000326932.8': 11963106.0, 'ENST00000396505.7': 11956207.0}	{'ENST00000683431.1': 11964466.0, 'ENST00000326932.8': 11964466.0, 'ENST00000396505.7': 11964466.0}	{'ENST00000683431.1': '-', 'ENST00000326932.8': '-', 'ENST00000396505.7': '-'}	ENST00000683431.1	3UTR	protein_coding	74	chr11	11963036	11964466	-	['ENST00000683431.1', 'ENST00000326932.8', 'ENST00000396505.7']	['ENST00000683431.1']	ENST00000683431.1	3UTR	protein_coding	74	chr11	11963036	11964466	-	[]	['ENST00000683431.1', 'ENST00000326932.8', 'ENST00000396505.7']	ENST00000683431.1	3UTR	protein_coding	74	chr11	11963036	11964466	-	ENST00000683431.1	3UTR	protein_coding	74	chr11	11963036	11964466	-
Merged-chr11-65921548-1	chr11	65921511	65921585	+	0	{'ENST00000312515.7': '3UTR', 'ENST00000527119.5': '3UTR', 'ENST00000532933.1': '3UTR'}	{'ENST00000312515.7': 'protein_coding', 'ENST00000527119.5': 'protein_coding', 'ENST00000532933.1': 'protein_coding'}	{'ENST00000312515.7': 52, 'ENST00000527119.5': 19, 'ENST00000532933.1': 43}	{'ENST00000312515.7': 'chr11', 'ENST00000527119.5': 'chr11', 'ENST00000532933.1': 'chr11'}	{'ENST00000312515.7': 65921433.0, 'ENST00000527119.5': 65921433.0, 'ENST00000532933.1': 65921433.0}	{'ENST00000312515.7': 65921563.0, 'ENST00000527119.5': 65921530.0, 'ENST00000532933.1': 65921554.0}	{'ENST00000312515.7': '+', 'ENST00000527119.5': '+', 'ENST00000532933.1': '+'}	ENST00000312515.7	3UTR	protein_coding	52	chr11	65921433	65921563	+	['ENST00000312515.7', 'ENST00000527119.5', 'ENST00000532933.1']	['ENST00000312515.7']	ENST00000312515.7	3UTR	protein_coding	52	chr11	65921433	65921563	+	[]	['ENST00000312515.7', 'ENST00000527119.5', 'ENST00000532933.1']	ENST00000312515.7	3UTR	protein_coding	52	chr11	65921433	65921563	+	ENST00000312515.7	3UTR	protein_coding	52	chr11	65921433	65921563	+
Merged-chr11-121308607-1	chr11	121308570	121308644	+	0	{'ENST00000534230.5': '3UTR', 'ENST00000264027.9': 'exon', 'ENST00000392789.2': 'exon'}	{'ENST00000534230.5': 'protein_coding', 'ENST00000264027.9': 'protein_coding', 'ENST00000392789.2': 'protein_coding'}	{'ENST00000534230.5': 60, 'ENST00000264027.9': 74, 'ENST00000392789.2': 63}	{'ENST00000534230.5': 'chr11', 'ENST00000264027.9': 'chr11', 'ENST00000392789.2': 'chr11'}	{'ENST00000534230.5': 121307510.0, 'ENST00000264027.9': 121307057.0, 'ENST00000392789.2': 121307057.0}	{'ENST00000534230.5': 121308630.0, 'ENST00000264027.9': 121313410.0, 'ENST00000392789.2': 121308633.0}	{'ENST00000534230.5': '+', 'ENST00000264027.9': '+', 'ENST00000392789.2': '+'}	ENST00000264027.9	exon	protein_coding	74	chr11	121307057	121313410	+	['ENST00000534230.5', 'ENST00000264027.9', 'ENST00000392789.2']	['ENST00000264027.9']	ENST00000264027.9	exon	protein_coding	74	chr11	121307057	121313410	+	[]	['ENST00000534230.5']	ENST00000534230.5	3UTR	protein_coding	60	chr11	121307510	121308630	+	ENST00000264027.9	exon	protein_coding	74	chr11	121307057	121313410	+
Merged-chr11-47162228-1	chr11	47162191	47162265	+	0	{'ENST00000278460.12': '3UTR', 'ENST00000395460.6': '3UTR', 'ENST00000378615.7': 'exon', 'ENST00000378618.6': 'Intron'}	{'ENST00000278460.12': 'protein_coding', 'ENST00000395460.6': 'protein_coding', 'ENST00000378615.7': 'protein_coding', 'ENST00000378618.6': 'protein_coding'}	{'ENST00000278460.12': 56, 'ENST00000395460.6': 56, 'ENST00000378615.7': 56, 'ENST00000378618.6': 74}	{'ENST00000278460.12': 'chr11', 'ENST00000395460.6': 'chr11', 'ENST00000378615.7': 'chr11', 'ENST00000378618.6': 'chr11'}	{'ENST00000278460.12': 47161636.0, 'ENST00000395460.6': 47161192.0, 'ENST00000378615.7': 47161446.0, 'ENST00000378618.6': 47161190.0}	{'ENST00000278460.12': 47162247.0, 'ENST00000395460.6': 47162247.0, 'ENST00000378615.7': 47162247.0, 'ENST00000378618.6': 47164092.0}	{'ENST00000278460.12': '+', 'ENST00000395460.6': '+', 'ENST00000378615.7': '+', 'ENST00000378618.6': '+'}	ENST00000378618.6	Intron	protein_coding	74	chr11	47161190	47164092	+	['ENST00000278460.12', 'ENST00000395460.6', 'ENST00000378615.7', 'ENST00000378618.6']	['ENST00000278460.12']	ENST00000278460.12	3UTR	protein_coding	56	chr11	47161636	47162247	+	[]	['ENST00000278460.12', 'ENST00000395460.6']	ENST00000278460.12	3UTR	protein_coding	56	chr11	47161636	47162247	+	ENST00000278460.12	3UTR	protein_coding	56	chr11	47161636	47162247	+
Merged-chr11-126262943-1	chr11	126262906	126262980	-	0	{'ENST00000627851.2': '3UTR', 'ENST00000533050.6': '3UTR', 'ENST00000332118.11': '3UTR'}	{'ENST00000627851.2': 'protein_coding', 'ENST00000533050.6': 'protein_coding', 'ENST00000332118.11': 'protein_coding'}	{'ENST00000627851.2': 74, 'ENST00000533050.6': 62, 'ENST00000332118.11': 43}	{'ENST00000627851.2': 'chr11', 'ENST00000533050.6': 'chr11', 'ENST00000332118.11': 'chr11'}	{'ENST00000627851.2': 126262131.0, 'ENST00000533050.6': 126262131.0, 'ENST00000332118.11': 126262938.0}	{'ENST00000627851.2': 126262984.0, 'ENST00000533050.6': 126262968.0, 'ENST00000332118.11': 126263918.0}	{'ENST00000627851.2': '+', 'ENST00000533050.6': '+', 'ENST00000332118.11': '-'}	ENST00000627851.2	3UTR	protein_coding	74	chr11	126262131	126262984	+	['ENST00000627851.2', 'ENST00000533050.6', 'ENST00000332118.11']	['ENST00000533050.6', 'ENST00000332118.11']	ENST00000533050.6	3UTR	protein_coding	62	chr11	126262131	126262968	+	[]	['ENST00000627851.2', 'ENST00000533050.6', 'ENST00000332118.11']	ENST00000627851.2	3UTR	protein_coding	74	chr11	126262131	126262984	+	ENST00000533050.6	3UTR	protein_coding	62	chr11	126262131	126262968	+
Merged-chr11-61799646-1	chr11	61799609	61799683	-	0	{'ENST00000350997.12': '3UTR'}	{'ENST00000350997.12': 'protein_coding'}	{'ENST00000350997.12': 57}	{'ENST00000350997.12': 'chr11'}	{'ENST00000350997.12': 61799627.0}	{'ENST00000350997.12': 61802413.0}	{'ENST00000350997.12': '-'}	ENST00000350997.12	3UTR	protein_coding	57	chr11	61799627	61802413	-	['ENST00000350997.12']	['ENST00000350997.12']	ENST00000350997.12	3UTR	protein_coding	57	chr11	61799627	61802413	-	[]	['ENST00000350997.12']	ENST00000350997.12	3UTR	protein_coding	57	chr11	61799627	61802413	-	ENST00000350997.12	3UTR	protein_coding	57	chr11	61799627	61802413	-
Merged-chr11-66004139-1	chr11	66004102	66004176	+	0	{'ENST00000445560.6': '3UTR', 'ENST00000312175.7': '3UTR', 'ENST00000533166.5': '3UTR'}	{'ENST00000445560.6': 'protein_coding', 'ENST00000312175.7': 'protein_coding', 'ENST00000533166.5': 'protein_coding'}	{'ENST00000445560.6': 44, 'ENST00000312175.7': 47, 'ENST00000533166.5': 29}	{'ENST00000445560.6': 'chr11', 'ENST00000312175.7': 'chr11', 'ENST00000533166.5': 'chr11'}	{'ENST00000445560.6': 66003770.0, 'ENST00000312175.7': 66003770.0, 'ENST00000533166.5': 66003770.0}	{'ENST00000445560.6': 66004146.0, 'ENST00000312175.7': 66004149.0, 'ENST00000533166.5': 66004131.0}	{'ENST00000445560.6': '+', 'ENST00000312175.7': '+', 'ENST00000533166.5': '+'}	ENST00000312175.7	3UTR	protein_coding	47	chr11	66003770	66004149	+	['ENST00000445560.6', 'ENST00000312175.7', 'ENST00000533166.5']	['ENST00000312175.7']	ENST00000312175.7	3UTR	protein_coding	47	chr11	66003770	66004149	+	[]	['ENST00000445560.6', 'ENST00000312175.7', 'ENST00000533166.5']	ENST00000312175.7	3UTR	protein_coding	47	chr11	66003770	66004149	+	ENST00000312175.7	3UTR	protein_coding	47	chr11	66003770	66004149	+
Merged-chr22-41907295-1	chr22	41907258	41907332	+	0	{'ENST00000361204.9': '3UTR'}	{'ENST00000361204.9': 'protein_coding'}	{'ENST00000361204.9': 47}	{'ENST00000361204.9': 'chr22'}	{'ENST00000361204.9': 41905658.0}	{'ENST00000361204.9': 41907305.0}	{'ENST00000361204.9': '+'}	ENST00000361204.9	3UTR	protein_coding	47	chr22	41905658	41907305	+	['ENST00000361204.9']	['ENST00000361204.9']	ENST00000361204.9	3UTR	protein_coding	47	chr22	41905658	41907305	+	[]	['ENST00000361204.9']	ENST00000361204.9	3UTR	protein_coding	47	chr22	41905658	41907305	+	ENST00000361204.9	3UTR	protein_coding	47	chr22	41905658	41907305	+
Merged-chr11-57818427-1	chr11	57818390	57818464	+	0	{'ENST00000673826.1': '3UTR', 'ENST00000673683.1': '3UTR', 'ENST00000674106.1': '3UTR', 'ENST00000683201.1': '3UTR', 'ENST00000683769.1': '3UTR', 'ENST00000524630.5': '3UTR', 'ENST00000358694.10': '3UTR', 'ENST00000399050.10': '3UTR'}	{'ENST00000673826.1': 'protein_coding', 'ENST00000673683.1': 'protein_coding', 'ENST00000674106.1': 'protein_coding', 'ENST00000683201.1': 'protein_coding', 'ENST00000683769.1': 'protein_coding', 'ENST00000524630.5': 'protein_coding', 'ENST00000358694.10': 'protein_coding', 'ENST00000399050.10': 'protein_coding'}	{'ENST00000673826.1': 42, 'ENST00000673683.1': 41, 'ENST00000674106.1': 40, 'ENST00000683201.1': 55, 'ENST00000683769.1': 53, 'ENST00000524630.5': 74, 'ENST00000358694.10': 74, 'ENST00000399050.10': 74}	{'ENST00000673826.1': 'chr11', 'ENST00000673683.1': 'chr11', 'ENST00000674106.1': 'chr11', 'ENST00000683201.1': 'chr11', 'ENST00000683769.1': 'chr11', 'ENST00000524630.5': 'chr11', 'ENST00000358694.10': 'chr11', 'ENST00000399050.10': 'chr11'}	{'ENST00000673826.1': 57816306.0, 'ENST00000673683.1': 57816306.0, 'ENST00000674106.1': 57816306.0, 'ENST00000683201.1': 57816306.0, 'ENST00000683769.1': 57816306.0, 'ENST00000524630.5': 57816306.0, 'ENST00000358694.10': 57816306.0, 'ENST00000399050.10': 57816306.0}	{'ENST00000673826.1': 57818432.0, 'ENST00000673683.1': 57818431.0, 'ENST00000674106.1': 57818430.0, 'ENST00000683201.1': 57818445.0, 'ENST00000683769.1': 57818443.0, 'ENST00000524630.5': 57819546.0, 'ENST00000358694.10': 57819178.0, 'ENST00000399050.10': 57819540.0}	{'ENST00000673826.1': '+', 'ENST00000673683.1': '+', 'ENST00000674106.1': '+', 'ENST00000683201.1': '+', 'ENST00000683769.1': '+', 'ENST00000524630.5': '+', 'ENST00000358694.10': '+', 'ENST00000399050.10': '+'}	ENST00000524630.5	3UTR	protein_coding	74	chr11	57816306	57819546	+	['ENST00000673826.1', 'ENST00000673683.1', 'ENST00000674106.1', 'ENST00000683201.1', 'ENST00000683769.1', 'ENST00000524630.5', 'ENST00000358694.10', 'ENST00000399050.10']	['ENST00000399050.10']	ENST00000399050.10	3UTR	protein_coding	74	chr11	57816306	57819540	+	[]	['ENST00000673826.1', 'ENST00000673683.1', 'ENST00000674106.1', 'ENST00000683201.1', 'ENST00000683769.1', 'ENST00000524630.5', 'ENST00000358694.10', 'ENST00000399050.10']	ENST00000524630.5	3UTR	protein_coding	74	chr11	57816306	57819546	+	ENST00000399050.10	3UTR	protein_coding	74	chr11	57816306	57819540	+
Merged-chr11-62559632-1	chr11	62559595	62559669	-	0	{'ENST00000329251.5': '3UTR', 'ENST00000496634.2': 'exon'}	{'ENST00000329251.5': 'protein_coding', 'ENST00000496634.2': 'protein_coding'}	{'ENST00000329251.5': 74, 'ENST00000496634.2': 67}	{'ENST00000329251.5': 'chr11', 'ENST00000496634.2': 'chr11'}	{'ENST00000329251.5': 62559596.0, 'ENST00000496634.2': 62559603.0}	{'ENST00000329251.5': 62559681.0, 'ENST00000496634.2': 62559837.0}	{'ENST00000329251.5': '-', 'ENST00000496634.2': '-'}	ENST00000329251.5	3UTR	protein_coding	74	chr11	62559596	62559681	-	['ENST00000329251.5', 'ENST00000496634.2']	['ENST00000329251.5']	ENST00000329251.5	3UTR	protein_coding	74	chr11	62559596	62559681	-	[]	['ENST00000329251.5']	ENST00000329251.5	3UTR	protein_coding	74	chr11	62559596	62559681	-	ENST00000329251.5	3UTR	protein_coding	74	chr11	62559596	62559681	-
Merged-chr11-2132117-1	chr11	2132080	2132154	-	0	{'ENST00000695541.1': '3UTR', 'ENST00000381395.5': '3UTR', 'ENST00000416167.7': '3UTR'}	{'ENST00000695541.1': 'protein_coding', 'ENST00000381395.5': 'protein_coding', 'ENST00000416167.7': 'protein_coding'}	{'ENST00000695541.1': 74, 'ENST00000381395.5': 74, 'ENST00000416167.7': 74}	{'ENST00000695541.1': 'chr11', 'ENST00000381395.5': 'chr11', 'ENST00000416167.7': 'chr11'}	{'ENST00000695541.1': 2131395.0, 'ENST00000381395.5': 2129112.0, 'ENST00000416167.7': 2129117.0}	{'ENST00000695541.1': 2132989.0, 'ENST00000381395.5': 2132989.0, 'ENST00000416167.7': 2132989.0}	{'ENST00000695541.1': '-', 'ENST00000381395.5': '-', 'ENST00000416167.7': '-'}	ENST00000695541.1	3UTR	protein_coding	74	chr11	2131395	2132989	-	['ENST00000695541.1', 'ENST00000381395.5', 'ENST00000416167.7']	['ENST00000416167.7']	ENST00000416167.7	3UTR	protein_coding	74	chr11	2129117	2132989	-	[]	['ENST00000695541.1', 'ENST00000381395.5', 'ENST00000416167.7']	ENST00000695541.1	3UTR	protein_coding	74	chr11	2131395	2132989	-	ENST00000416167.7	3UTR	protein_coding	74	chr11	2129117	2132989	-
Merged-chr11-64321801-1	chr11	64321764	64321838	+	0	{'ENST00000265462.9': '3UTR'}	{'ENST00000265462.9': 'protein_coding'}	{'ENST00000265462.9': 47}	{'ENST00000265462.9': 'chr11'}	{'ENST00000265462.9': 64321689.0}	{'ENST00000265462.9': 64321811.0}	{'ENST00000265462.9': '+'}	ENST00000265462.9	3UTR	protein_coding	47	chr11	64321689	64321811	+	['ENST00000265462.9']	['ENST00000265462.9']	ENST00000265462.9	3UTR	protein_coding	47	chr11	64321689	64321811	+	[]	['ENST00000265462.9']	ENST00000265462.9	3UTR	protein_coding	47	chr11	64321689	64321811	+	ENST00000265462.9	3UTR	protein_coding	47	chr11	64321689	64321811	+
Merged-chr11-67257979-1	chr11	67257942	67258016	+	0	{'ENST00000529006.7': '3UTR', 'ENST00000652902.1': 'Intron'}	{'ENST00000529006.7': 'protein_coding', 'ENST00000652902.1': 'lncRNA'}	{'ENST00000529006.7': 74, 'ENST00000652902.1': 74}	{'ENST00000529006.7': 'chr11', 'ENST00000652902.1': 'chr11'}	{'ENST00000529006.7': 67255053.0, 'ENST00000652902.1': 67253709.0}	{'ENST00000529006.7': 67258082.0, 'ENST00000652902.1': 67258941.0}	{'ENST00000529006.7': '+', 'ENST00000652902.1': '-'}	ENST00000529006.7	3UTR	protein_coding	74	chr11	67255053	67258082	+	['ENST00000529006.7', 'ENST00000652902.1']	['ENST00000529006.7']	ENST00000529006.7	3UTR	protein_coding	74	chr11	67255053	67258082	+	[]	['ENST00000529006.7']	ENST00000529006.7	3UTR	protein_coding	74	chr11	67255053	67258082	+	ENST00000529006.7	3UTR	protein_coding	74	chr11	67255053	67258082	+
Merged-chr11-102378669-1	chr11	102378632	102378706	+	0	{'ENST00000227758.7': '3UTR', 'ENST00000532672.5': '3UTR', 'ENST00000613397.4': '3UTR'}	{'ENST00000227758.7': 'protein_coding', 'ENST00000532672.5': 'protein_coding', 'ENST00000613397.4': 'protein_coding'}	{'ENST00000227758.7': 38, 'ENST00000532672.5': 37, 'ENST00000613397.4': 31}	{'ENST00000227758.7': 'chr11', 'ENST00000532672.5': 'chr11', 'ENST00000613397.4': 'chr11'}	{'ENST00000227758.7': 102378181.0, 'ENST00000532672.5': 102378181.0, 'ENST00000613397.4': 102378181.0}	{'ENST00000227758.7': 102378670.0, 'ENST00000532672.5': 102378669.0, 'ENST00000613397.4': 102378663.0}	{'ENST00000227758.7': '+', 'ENST00000532672.5': '+', 'ENST00000613397.4': '+'}	ENST00000227758.7	3UTR	protein_coding	38	chr11	102378181	102378670	+	['ENST00000227758.7', 'ENST00000532672.5', 'ENST00000613397.4']	['ENST00000227758.7']	ENST00000227758.7	3UTR	protein_coding	38	chr11	102378181	102378670	+	[]	['ENST00000227758.7', 'ENST00000532672.5', 'ENST00000613397.4']	ENST00000227758.7	3UTR	protein_coding	38	chr11	102378181	102378670	+	ENST00000227758.7	3UTR	protein_coding	38	chr11	102378181	102378670	+
Merged-chr11-46677101-1	chr11	46677064	46677138	-	0	{'ENST00000311956.9': '3UTR'}	{'ENST00000311956.9': 'protein_coding'}	{'ENST00000311956.9': 59}	{'ENST00000311956.9': 'chr11'}	{'ENST00000311956.9': 46677080.0}	{'ENST00000311956.9': 46679039.0}	{'ENST00000311956.9': '-'}	ENST00000311956.9	3UTR	protein_coding	59	chr11	46677080	46679039	-	['ENST00000311956.9']	['ENST00000311956.9']	ENST00000311956.9	3UTR	protein_coding	59	chr11	46677080	46679039	-	[]	['ENST00000311956.9']	ENST00000311956.9	3UTR	protein_coding	59	chr11	46677080	46679039	-	ENST00000311956.9	3UTR	protein_coding	59	chr11	46677080	46679039	-
Merged-chr11-61346904-1	chr11	61346867	61346941	+	0	{'ENST00000394900.8': '3UTR'}	{'ENST00000394900.8': 'protein_coding'}	{'ENST00000394900.8': 74}	{'ENST00000394900.8': 'chr11'}	{'ENST00000394900.8': 61346501.0}	{'ENST00000394900.8': 61349242.0}	{'ENST00000394900.8': '+'}	ENST00000394900.8	3UTR	protein_coding	74	chr11	61346501	61349242	+	['ENST00000394900.8']	['ENST00000394900.8']	ENST00000394900.8	3UTR	protein_coding	74	chr11	61346501	61349242	+	[]	['ENST00000394900.8']	ENST00000394900.8	3UTR	protein_coding	74	chr11	61346501	61349242	+	ENST00000394900.8	3UTR	protein_coding	74	chr11	61346501	61349242	+
Merged-chr11-63998398-1	chr11	63998361	63998435	+	0	{'ENST00000541478.5': '3UTR', 'ENST00000538426.6': '3UTR', 'ENST00000535715.5': 'Intron'}	{'ENST00000541478.5': 'protein_coding', 'ENST00000538426.6': 'protein_coding', 'ENST00000535715.5': 'protein_coding'}	{'ENST00000541478.5': 15, 'ENST00000538426.6': 51, 'ENST00000535715.5': 74}	{'ENST00000541478.5': 'chr11', 'ENST00000538426.6': 'chr11', 'ENST00000535715.5': 'chr11'}	{'ENST00000541478.5': 63997544.0, 'ENST00000538426.6': 63997544.0, 'ENST00000535715.5': 63997768.0}	{'ENST00000541478.5': 63998376.0, 'ENST00000538426.6': 63998412.0, 'ENST00000535715.5': 64001455.0}	{'ENST00000541478.5': '+', 'ENST00000538426.6': '+', 'ENST00000535715.5': '+'}	ENST00000535715.5	Intron	protein_coding	74	chr11	63997768	64001455	+	['ENST00000541478.5', 'ENST00000538426.6', 'ENST00000535715.5']	['ENST00000538426.6']	ENST00000538426.6	3UTR	protein_coding	51	chr11	63997544	63998412	+	[]	['ENST00000541478.5', 'ENST00000538426.6']	ENST00000538426.6	3UTR	protein_coding	51	chr11	63997544	63998412	+	ENST00000538426.6	3UTR	protein_coding	51	chr11	63997544	63998412	+
Merged-chr11-64289479-1	chr11	64289442	64289516	+	0	{'ENST00000377702.8': '3UTR', 'ENST00000313074.7': '3UTR'}	{'ENST00000377702.8': 'protein_coding', 'ENST00000313074.7': 'protein_coding'}	{'ENST00000377702.8': 52, 'ENST00000313074.7': 49}	{'ENST00000377702.8': 'chr11', 'ENST00000313074.7': 'chr11'}	{'ENST00000377702.8': 64289194.0, 'ENST00000313074.7': 64289363.0}	{'ENST00000377702.8': 64289494.0, 'ENST00000313074.7': 64289491.0}	{'ENST00000377702.8': '+', 'ENST00000313074.7': '+'}	ENST00000377702.8	3UTR	protein_coding	52	chr11	64289194	64289494	+	['ENST00000377702.8', 'ENST00000313074.7']	[]	ENST00000377702.8	3UTR	protein_coding	52	chr11	64289194	64289494	+	[]	['ENST00000377702.8', 'ENST00000313074.7']	ENST00000377702.8	3UTR	protein_coding	52	chr11	64289194	64289494	+	ENST00000377702.8	3UTR	protein_coding	52	chr11	64289194	64289494	+
Merged-chr11-65883934-1	chr11	65883897	65883971	-	0	{'ENST00000357519.9': '3UTR', 'ENST00000338369.6': '3UTR', 'ENST00000533045.5': '3UTR'}	{'ENST00000357519.9': 'protein_coding', 'ENST00000338369.6': 'protein_coding', 'ENST00000533045.5': 'protein_coding'}	{'ENST00000357519.9': 74, 'ENST00000338369.6': 51, 'ENST00000533045.5': 24}	{'ENST00000357519.9': 'chr11', 'ENST00000338369.6': 'chr11', 'ENST00000533045.5': 'chr11'}	{'ENST00000357519.9': 65883740.0, 'ENST00000338369.6': 65883921.0, 'ENST00000533045.5': 65883948.0}	{'ENST00000357519.9': 65883976.0, 'ENST00000338369.6': 65883976.0, 'ENST00000533045.5': 65883980.0}	{'ENST00000357519.9': '-', 'ENST00000338369.6': '-', 'ENST00000533045.5': '-'}	ENST00000357519.9	3UTR	protein_coding	74	chr11	65883740	65883976	-	['ENST00000357519.9', 'ENST00000338369.6', 'ENST00000533045.5']	['ENST00000357519.9']	ENST00000357519.9	3UTR	protein_coding	74	chr11	65883740	65883976	-	[]	['ENST00000357519.9', 'ENST00000338369.6', 'ENST00000533045.5']	ENST00000357519.9	3UTR	protein_coding	74	chr11	65883740	65883976	-	ENST00000357519.9	3UTR	protein_coding	74	chr11	65883740	65883976	-
Merged-chr11-10307383-1	chr11	10307346	10307420	+	0	{'ENST00000534464.1': '3UTR', 'ENST00000278175.10': '3UTR', 'ENST00000530439.1': '3UTR', 'ENST00000528655.5': '3UTR'}	{'ENST00000534464.1': 'protein_coding', 'ENST00000278175.10': 'protein_coding', 'ENST00000530439.1': 'protein_coding', 'ENST00000528655.5': 'protein_coding'}	{'ENST00000534464.1': 49, 'ENST00000278175.10': 51, 'ENST00000530439.1': 16, 'ENST00000528655.5': 9}	{'ENST00000534464.1': 'chr11', 'ENST00000278175.10': 'chr11', 'ENST00000530439.1': 'chr11', 'ENST00000528655.5': 'chr11'}	{'ENST00000534464.1': 10306639.0, 'ENST00000278175.10': 10306639.0, 'ENST00000530439.1': 10306639.0, 'ENST00000528655.5': 10306639.0}	{'ENST00000534464.1': 10307395.0, 'ENST00000278175.10': 10307397.0, 'ENST00000530439.1': 10307362.0, 'ENST00000528655.5': 10307355.0}	{'ENST00000534464.1': '+', 'ENST00000278175.10': '+', 'ENST00000530439.1': '+', 'ENST00000528655.5': '+'}	ENST00000278175.10	3UTR	protein_coding	51	chr11	10306639	10307397	+	['ENST00000534464.1', 'ENST00000278175.10', 'ENST00000530439.1', 'ENST00000528655.5']	['ENST00000278175.10']	ENST00000278175.10	3UTR	protein_coding	51	chr11	10306639	10307397	+	[]	['ENST00000534464.1', 'ENST00000278175.10', 'ENST00000530439.1', 'ENST00000528655.5']	ENST00000278175.10	3UTR	protein_coding	51	chr11	10306639	10307397	+	ENST00000278175.10	3UTR	protein_coding	51	chr11	10306639	10307397	+
Merged-chr13-98024260-1	chr13	98024223	98024297	+	0	{'ENST00000261574.10': '3UTR', 'ENST00000651721.2': '3UTR'}	{'ENST00000261574.10': 'protein_coding', 'ENST00000651721.2': 'protein_coding'}	{'ENST00000261574.10': 72, 'ENST00000651721.2': 73}	{'ENST00000261574.10': 'chr13', 'ENST00000651721.2': 'chr13'}	{'ENST00000261574.10': 98021820.0, 'ENST00000651721.2': 98021820.0}	{'ENST00000261574.10': 98024295.0, 'ENST00000651721.2': 98024296.0}	{'ENST00000261574.10': '+', 'ENST00000651721.2': '+'}	ENST00000651721.2	3UTR	protein_coding	73	chr13	98021820	98024296	+	['ENST00000261574.10', 'ENST00000651721.2']	['ENST00000651721.2']	ENST00000651721.2	3UTR	protein_coding	73	chr13	98021820	98024296	+	[]	['ENST00000261574.10', 'ENST00000651721.2']	ENST00000651721.2	3UTR	protein_coding	73	chr13	98021820	98024296	+	ENST00000651721.2	3UTR	protein_coding	73	chr13	98021820	98024296	+
Merged-chr13-105631936-1	chr13	105631899	105631973	+	0	{'Intergenic': 'Unlabeled'}	{'Intergenic': 'Intergenic'}	{'Intergenic': 0}	{'Intergenic': nan}	{'Intergenic': nan}	{'Intergenic': nan}	{'Intergenic': '+'}	Intergenic	Unlabeled	Intergenic	0				+	['Intergenic']	[]	Intergenic	Unlabeled	Intergenic	0				+	[]	[]	Intergenic	Unlabeled	Intergenic	0				+	Intergenic	Unlabeled	Intergenic	0				+
Merged-chr13-113323652-1	chr13	113323615	113323689	+	0	{'ENST00000332556.5': '3UTR'}	{'ENST00000332556.5': 'protein_coding'}	{'ENST00000332556.5': 57}	{'ENST00000332556.5': 'chr13'}	{'ENST00000332556.5': 113322419.0}	{'ENST00000332556.5': 113323672.0}	{'ENST00000332556.5': '+'}	ENST00000332556.5	3UTR	protein_coding	57	chr13	113322419	113323672	+	['ENST00000332556.5']	['ENST00000332556.5']	ENST00000332556.5	3UTR	protein_coding	57	chr13	113322419	113323672	+	[]	['ENST00000332556.5']	ENST00000332556.5	3UTR	protein_coding	57	chr13	113322419	113323672	+	ENST00000332556.5	3UTR	protein_coding	57	chr13	113322419	113323672	+
Merged-chr13-23474653-1	chr13	23474616	23474690	+	0	{'ENST00000671576.1': 'Intron', 'ENST00000655268.1': 'Intron'}	{'ENST00000671576.1': 'lncRNA', 'ENST00000655268.1': 'lncRNA'}	{'ENST00000671576.1': 74, 'ENST00000655268.1': 74}	{'ENST00000671576.1': 'chr13', 'ENST00000655268.1': 'chr13'}	{'ENST00000671576.1': 23470690.0, 'ENST00000655268.1': 23470690.0}	{'ENST00000671576.1': 23486234.0, 'ENST00000655268.1': 23482348.0}	{'ENST00000671576.1': '+', 'ENST00000655268.1': '+'}	ENST00000671576.1	Intron	lncRNA	74	chr13	23470690	23486234	+	['ENST00000671576.1', 'ENST00000655268.1']	[]	ENST00000671576.1	Intron	lncRNA	74	chr13	23470690	23486234	+	[]	[]	ENST00000671576.1	Intron	lncRNA	74	chr13	23470690	23486234	+	ENST00000671576.1	Intron	lncRNA	74	chr13	23470690	23486234	+
Merged-chr13-32517636-1	chr13	32517599	32517673	-	0	{'ENST00000267068.6': '3UTR', 'ENST00000674349.1': '3UTR', 'ENST00000674428.1': '3UTR', 'ENST00000674421.1': '3UTR', 'ENST00000674297.1': '3UTR', 'ENST00000674377.1': '3UTR', 'ENST00000674437.1': '3UTR', 'ENST00000674327.1': '3UTR', 'ENST00000674484.1': '3UTR', 'ENST00000357505.10': 'Intron', 'ENST00000446957.6': 'Intron', 'ENST00000674456.1': 'Intron'}	{'ENST00000267068.6': 'protein_coding', 'ENST00000674349.1': 'protein_coding', 'ENST00000674428.1': 'protein_coding', 'ENST00000674421.1': 'protein_coding', 'ENST00000674297.1': 'protein_coding', 'ENST00000674377.1': 'protein_coding', 'ENST00000674437.1': 'protein_coding', 'ENST00000674327.1': 'protein_coding', 'ENST00000674484.1': 'protein_coding', 'ENST00000357505.10': 'protein_coding', 'ENST00…	{'ENST00000267068.6': 74, 'ENST00000674349.1': 74, 'ENST00000674428.1': 74, 'ENST00000674421.1': 74, 'ENST00000674297.1': 74, 'ENST00000674377.1': 74, 'ENST00000674437.1': 74, 'ENST00000674327.1': 74, 'ENST00000674484.1': 53, 'ENST00000357505.10': 74, 'ENST00000446957.6': 74, 'ENST00000674456.1': 74}	{'ENST00000267068.6': 'chr13', 'ENST00000674349.1': 'chr13', 'ENST00000674428.1': 'chr13', 'ENST00000674421.1': 'chr13', 'ENST00000674297.1': 'chr13', 'ENST00000674377.1': 'chr13', 'ENST00000674437.1': 'chr13', 'ENST00000674327.1': 'chr13', 'ENST00000674484.1': 'chr13', 'ENST00000357505.10': 'chr13', 'ENST00000446957.6': 'chr13', 'ENST00000674456.1': 'chr13'}	{'ENST00000267068.6': 32510292.0, 'ENST00000674349.1': 32514020.0, 'ENST00000674428.1': 32516893.0, 'ENST00000674421.1': 32516901.0, 'ENST00000674297.1': 32516907.0, 'ENST00000674377.1': 32516942.0, 'ENST00000674437.1': 32516972.0, 'ENST00000674327.1': 32516996.0, 'ENST00000674484.1': 32517621.0, 'ENST00000357505.10': 32444126.0, 'ENST00000446957.6': 32442548.0, 'ENST00000674456.1': 32444126.0}	{'ENST00000267068.6': 32517804.0, 'ENST00000674349.1': 32517804.0, 'ENST00000674428.1': 32517804.0, 'ENST00000674421.1': 32517804.0, 'ENST00000674297.1': 32517804.0, 'ENST00000674377.1': 32517804.0, 'ENST00000674437.1': 32517804.0, 'ENST00000674327.1': 32517923.0, 'ENST00000674484.1': 32517804.0, 'ENST00000357505.10': 32517856.0, 'ENST00000446957.6': 32517856.0, 'ENST00000674456.1': 32538617.0}	{'ENST00000267068.6': '-', 'ENST00000674349.1': '-', 'ENST00000674428.1': '-', 'ENST00000674421.1': '-', 'ENST00000674297.1': '-', 'ENST00000674377.1': '-', 'ENST00000674437.1': '-', 'ENST00000674327.1': '-', 'ENST00000674484.1': '-', 'ENST00000357505.10': '-', 'ENST00000446957.6': '-', 'ENST00000674456.1': '-'}	ENST00000674327.1	3UTR	protein_coding	74	chr13	32516996	32517923	-	['ENST00000267068.6', 'ENST00000674349.1', 'ENST00000674428.1', 'ENST00000674421.1', 'ENST00000674297.1', 'ENST00000674377.1', 'ENST00000674437.1', 'ENST00000674327.1', 'ENST00000674484.1', 'ENST00000357505.10', 'ENST00000446957.6', 'ENST00000674456.1']	[]	ENST00000674327.1	3UTR	protein_coding	74	chr13	32516996	32517923	-	[]	['ENST00000267068.6', 'ENST00000674349.1', 'ENST00000674428.1', 'ENST00000674421.1', 'ENST00000674297.1', 'ENST00000674377.1', 'ENST00000674437.1', 'ENST00000674327.1', 'ENST00000674484.1']	ENST00000267068.6	3UTR	protein_coding	74	chr13	32510292	32517804	-	ENST00000674327.1	3UTR	protein_coding	74	chr13	32516996	32517923	-
Merged-chr13-32770500-1	chr13	32770463	32770537	+	0	{'ENST00000315596.15': 'exon'}	{'ENST00000315596.15': 'protein_coding'}	{'ENST00000315596.15': 74}	{'ENST00000315596.15': 'chr13'}	{'ENST00000315596.15': 32770121.0}	{'ENST00000315596.15': 32770560.0}	{'ENST00000315596.15': '+'}	ENST00000315596.15	exon	protein_coding	74	chr13	32770121	32770560	+	['ENST00000315596.15']	['ENST00000315596.15']	ENST00000315596.15	exon	protein_coding	74	chr13	32770121	32770560	+	[]	[]	ENST00000315596.15	exon	protein_coding	74	chr13	32770121	32770560	+	ENST00000315596.15	exon	protein_coding	74	chr13	32770121	32770560	+
Merged-chr13-50043481-1	chr13	50043444	50043518	-	0	{'ENST00000692504.1': 'exon', 'ENST00000621282.4': 'Intron', 'ENST00000425586.5': 'Intron'}	{'ENST00000692504.1': 'lncRNA', 'ENST00000621282.4': 'lncRNA', 'ENST00000425586.5': 'lncRNA'}	{'ENST00000692504.1': 74, 'ENST00000621282.4': 74, 'ENST00000425586.5': 74}	{'ENST00000692504.1': 'chr13', 'ENST00000621282.4': 'chr13', 'ENST00000425586.5': 'chr13'}	{'ENST00000692504.1': 50043436.0, 'ENST00000621282.4': 50029492.0, 'ENST00000425586.5': 50029492.0}	{'ENST00000692504.1': 50044768.0, 'ENST00000621282.4': 50044639.0, 'ENST00000425586.5': 50044650.0}	{'ENST00000692504.1': '-', 'ENST00000621282.4': '-', 'ENST00000425586.5': '-'}	ENST00000692504.1	exon	lncRNA	74	chr13	50043436	50044768	-	['ENST00000692504.1', 'ENST00000621282.4', 'ENST00000425586.5']	[]	ENST00000692504.1	exon	lncRNA	74	chr13	50043436	50044768	-	[]	[]	ENST00000692504.1	exon	lncRNA	74	chr13	50043436	50044768	-	ENST00000692504.1	exon	lncRNA	74	chr13	50043436	50044768	-
Merged-chr13-72709497-1	chr13	72709460	72709534	-	0	{'ENST00000377818.4': '3UTR'}	{'ENST00000377818.4': 'protein_coding'}	{'ENST00000377818.4': 74}	{'ENST00000377818.4': 'chr13'}	{'ENST00000377818.4': 72708367.0}	{'ENST00000377818.4': 72710324.0}	{'ENST00000377818.4': '-'}	ENST00000377818.4	3UTR	protein_coding	74	chr13	72708367	72710324	-	['ENST00000377818.4']	['ENST00000377818.4']	ENST00000377818.4	3UTR	protein_coding	74	chr13	72708367	72710324	-	[]	['ENST00000377818.4']	ENST00000377818.4	3UTR	protein_coding	74	chr13	72708367	72710324	-	ENST00000377818.4	3UTR	protein_coding	74	chr13	72708367	72710324	-
Merged-chr13-98987249-1	chr13	98987212	98987286	+	0	{'ENST00000703210.1': 'Intron', 'ENST00000652315.1': 'Intron', 'ENST00000703216.1': 'Intron'}	{'ENST00000703210.1': 'protein_coding', 'ENST00000652315.1': 'protein_coding', 'ENST00000703216.1': 'protein_coding'}	{'ENST00000703210.1': 74, 'ENST00000652315.1': 74, 'ENST00000703216.1': 74}	{'ENST00000703210.1': 'chr13', 'ENST00000652315.1': 'chr13', 'ENST00000703216.1': 'chr13'}	{'ENST00000703210.1': 98955551.0, 'ENST00000652315.1': 98955551.0, 'ENST00000703216.1': 98955551.0}	{'ENST00000703210.1': 99015446.0, 'ENST00000652315.1': 99086222.0, 'ENST00000703216.1': 99084093.0}	{'ENST00000703210.1': '-', 'ENST00000652315.1': '-', 'ENST00000703216.1': '-'}	ENST00000703210.1	Intron	protein_coding	74	chr13	98955551	99015446	-	['ENST00000703210.1', 'ENST00000652315.1', 'ENST00000703216.1']	[]	ENST00000703210.1	Intron	protein_coding	74	chr13	98955551	99015446	-	[]	[]	ENST00000703210.1	Intron	protein_coding	74	chr13	98955551	99015446	-	ENST00000703210.1	Intron	protein_coding	74	chr13	98955551	99015446	-
Merged-chr13-100086053-1	chr13	100086016	100086090	-	0	{'ENST00000612598.3': 'exon', 'ENST00000654763.1': 'Intron'}	{'ENST00000612598.3': 'lncRNA', 'ENST00000654763.1': 'lncRNA'}	{'ENST00000612598.3': 66, 'ENST00000654763.1': 74}	{'ENST00000612598.3': 'chr13', 'ENST00000654763.1': 'chr13'}	{'ENST00000612598.3': 100086025.0, 'ENST00000654763.1': 100058447.0}	{'ENST00000612598.3': 100086727.0, 'ENST00000654763.1': 100088632.0}	{'ENST00000612598.3': '-', 'ENST00000654763.1': '-'}	ENST00000654763.1	Intron	lncRNA	74	chr13	100058447	100088632	-	['ENST00000612598.3', 'ENST00000654763.1']	[]	ENST00000654763.1	Intron	lncRNA	74	chr13	100058447	100088632	-	[]	[]	ENST00000654763.1	Intron	lncRNA	74	chr13	100058447	100088632	-	ENST00000654763.1	Intron	lncRNA	74	chr13	100058447	100088632	-
Merged-chr13-20723082-1	chr13	20723045	20723119	+	0	{'ENST00000304920.3': '3UTR'}	{'ENST00000304920.3': 'protein_coding'}	{'ENST00000304920.3': 53}	{'ENST00000304920.3': 'chr13'}	{'ENST00000304920.3': 20721952.0}	{'ENST00000304920.3': 20723098.0}	{'ENST00000304920.3': '+'}	ENST00000304920.3	3UTR	protein_coding	53	chr13	20721952	20723098	+	['ENST00000304920.3']	[]	ENST00000304920.3	3UTR	protein_coding	53	chr13	20721952	20723098	+	[]	['ENST00000304920.3']	ENST00000304920.3	3UTR	protein_coding	53	chr13	20721952	20723098	+	ENST00000304920.3	3UTR	protein_coding	53	chr13	20721952	20723098	+
Merged-chr13-30252853-1	chr13	30252816	30252890	-	0	{'ENST00000380615.8': 'Intron'}	{'ENST00000380615.8': 'protein_coding'}	{'ENST00000380615.8': 74}	{'ENST00000380615.8': 'chr13'}	{'ENST00000380615.8': 30241086.0}	{'ENST00000380615.8': 30255446.0}	{'ENST00000380615.8': '-'}	ENST00000380615.8	Intron	protein_coding	74	chr13	30241086	30255446	-	['ENST00000380615.8']	['ENST00000380615.8']	ENST00000380615.8	Intron	protein_coding	74	chr13	30241086	30255446	-	[]	[]	ENST00000380615.8	Intron	protein_coding	74	chr13	30241086	30255446	-	ENST00000380615.8	Intron	protein_coding	74	chr13	30241086	30255446	-
Merged-chr13-37714209-1	chr13	37714172	37714246	-	0	{'ENST00000379705.8': 'Intron', 'ENST00000338947.9': 'Intron'}	{'ENST00000379705.8': 'protein_coding', 'ENST00000338947.9': 'protein_coding'}	{'ENST00000379705.8': 74, 'ENST00000338947.9': 74}	{'ENST00000379705.8': 'chr13', 'ENST00000338947.9': 'chr13'}	{'ENST00000379705.8': 37692335.0, 'ENST00000338947.9': 37692335.0}	{'ENST00000379705.8': 37745936.0, 'ENST00000338947.9': 37782955.0}	{'ENST00000379705.8': '-', 'ENST00000338947.9': '-'}	ENST00000379705.8	Intron	protein_coding	74	chr13	37692335	37745936	-	['ENST00000379705.8', 'ENST00000338947.9']	['ENST00000379705.8']	ENST00000379705.8	Intron	protein_coding	74	chr13	37692335	37745936	-	[]	[]	ENST00000379705.8	Intron	protein_coding	74	chr13	37692335	37745936	-	ENST00000379705.8	Intron	protein_coding	74	chr13	37692335	37745936	-
Merged-chr13-39536625-1	chr13	39536588	39536662	-	0	{'ENST00000379589.4': 'Intron'}	{'ENST00000379589.4': 'protein_coding'}	{'ENST00000379589.4': 74}	{'ENST00000379589.4': 'chr13'}	{'ENST00000379589.4': 39378526.0}	{'ENST00000379589.4': 39600831.0}	{'ENST00000379589.4': '-'}	ENST00000379589.4	Intron	protein_coding	74	chr13	39378526	39600831	-	['ENST00000379589.4']	['ENST00000379589.4']	ENST00000379589.4	Intron	protein_coding	74	chr13	39378526	39600831	-	[]	[]	ENST00000379589.4	Intron	protein_coding	74	chr13	39378526	39600831	-	ENST00000379589.4	Intron	protein_coding	74	chr13	39378526	39600831	-
Merged-chr13-40224419-1	chr13	40224382	40224456	-	0	{'ENST00000615947.1': 'Intron', 'ENST00000638084.1': 'Intron', 'ENST00000637438.1': 'Intron'}	{'ENST00000615947.1': 'lncRNA', 'ENST00000638084.1': 'lncRNA', 'ENST00000637438.1': 'lncRNA'}	{'ENST00000615947.1': 74, 'ENST00000638084.1': 74, 'ENST00000637438.1': 74}	{'ENST00000615947.1': 'chr13', 'ENST00000638084.1': 'chr13', 'ENST00000637438.1': 'chr13'}	{'ENST00000615947.1': 40217750.0, 'ENST00000638084.1': 40217750.0, 'ENST00000637438.1': 40207052.0}	{'ENST00000615947.1': 40273463.0, 'ENST00000638084.1': 40350108.0, 'ENST00000637438.1': 40306564.0}	{'ENST00000615947.1': '-', 'ENST00000638084.1': '-', 'ENST00000637438.1': '-'}	ENST00000615947.1	Intron	lncRNA	74	chr13	40217750	40273463	-	['ENST00000615947.1', 'ENST00000638084.1', 'ENST00000637438.1']	[]	ENST00000615947.1	Intron	lncRNA	74	chr13	40217750	40273463	-	[]	[]	ENST00000615947.1	Intron	lncRNA	74	chr13	40217750	40273463	-	ENST00000615947.1	Intron	lncRNA	74	chr13	40217750	40273463	-
Merged-chr13-60485950-1	chr13	60485913	60485987	+	0	{'ENST00000621840.4': 'exon', 'ENST00000196169.7': 'Intron'}	{'ENST00000621840.4': 'protein_coding', 'ENST00000196169.7': 'protein_coding'}	{'ENST00000621840.4': 35, 'ENST00000196169.7': 40}	{'ENST00000621840.4': 'chr13', 'ENST00000196169.7': 'chr13'}	{'ENST00000621840.4': 60485802.0, 'ENST00000196169.7': 60485948.0}	{'ENST00000621840.4': 60485948.0, 'ENST00000196169.7': 60494434.0}	{'ENST00000621840.4': '+', 'ENST00000196169.7': '+'}	ENST00000196169.7	Intron	protein_coding	40	chr13	60485948	60494434	+	['ENST00000621840.4', 'ENST00000196169.7']	[]	ENST00000196169.7	Intron	protein_coding	40	chr13	60485948	60494434	+	[]	[]	ENST00000196169.7	Intron	protein_coding	40	chr13	60485948	60494434	+	ENST00000196169.7	Intron	protein_coding	40	chr13	60485948	60494434	+
Merged-chr13-72708382-1	chr13	72708345	72708419	-	0	{'ENST00000377818.4': '3UTR'}	{'ENST00000377818.4': 'protein_coding'}	{'ENST00000377818.4': 53}	{'ENST00000377818.4': 'chr13'}	{'ENST00000377818.4': 72708367.0}	{'ENST00000377818.4': 72710324.0}	{'ENST00000377818.4': '-'}	ENST00000377818.4	3UTR	protein_coding	53	chr13	72708367	72710324	-	['ENST00000377818.4']	['ENST00000377818.4']	ENST00000377818.4	3UTR	protein_coding	53	chr13	72708367	72710324	-	[]	['ENST00000377818.4']	ENST00000377818.4	3UTR	protein_coding	53	chr13	72708367	72710324	-	ENST00000377818.4	3UTR	protein_coding	53	chr13	72708367	72710324	-
Merged-chr13-80985715-1	chr13	80985678	80985752	-	0	{'ENST00000655229.1': 'exon', 'ENST00000665186.1': 'Intron', 'ENST00000669091.1': 'Intron'}	{'ENST00000655229.1': 'lncRNA', 'ENST00000665186.1': 'lncRNA', 'ENST00000669091.1': 'lncRNA'}	{'ENST00000655229.1': 74, 'ENST00000665186.1': 74, 'ENST00000669091.1': 74}	{'ENST00000655229.1': 'chr13', 'ENST00000665186.1': 'chr13', 'ENST00000669091.1': 'chr13'}	{'ENST00000655229.1': 80982168.0, 'ENST00000665186.1': 80819003.0, 'ENST00000669091.1': 80923149.0}	{'ENST00000655229.1': 80986479.0, 'ENST00000665186.1': 81017679.0, 'ENST00000669091.1': 81012052.0}	{'ENST00000655229.1': '-', 'ENST00000665186.1': '-', 'ENST00000669091.1': '-'}	ENST00000655229.1	exon	lncRNA	74	chr13	80982168	80986479	-	['ENST00000655229.1', 'ENST00000665186.1', 'ENST00000669091.1']	[]	ENST00000655229.1	exon	lncRNA	74	chr13	80982168	80986479	-	[]	[]	ENST00000655229.1	exon	lncRNA	74	chr13	80982168	80986479	-	ENST00000655229.1	exon	lncRNA	74	chr13	80982168	80986479	-
Merged-chr13-87680465-1	chr13	87680428	87680502	+	0	{'ENST00000325089.7': '3UTR'}	{'ENST00000325089.7': 'protein_coding'}	{'ENST00000325089.7': 74}	{'ENST00000325089.7': 'chr13'}	{'ENST00000325089.7': 87678263.0}	{'ENST00000325089.7': 87696272.0}	{'ENST00000325089.7': '+'}	ENST00000325089.7	3UTR	protein_coding	74	chr13	87678263	87696272	+	['ENST00000325089.7']	[]	ENST00000325089.7	3UTR	protein_coding	74	chr13	87678263	87696272	+	[]	['ENST00000325089.7']	ENST00000325089.7	3UTR	protein_coding	74	chr13	87678263	87696272	+	ENST00000325089.7	3UTR	protein_coding	74	chr13	87678263	87696272	+
Merged-chr13-94593841-1	chr13	94593804	94593878	-	0	{'ENST00000261296.7': 'Intron'}	{'ENST00000261296.7': 'protein_coding'}	{'ENST00000261296.7': 36}	{'ENST00000261296.7': 'chr13'}	{'ENST00000261296.7': 94592309.0}	{'ENST00000261296.7': 94593840.0}	{'ENST00000261296.7': '-'}	ENST00000261296.7	Intron	protein_coding	36	chr13	94592309	94593840	-	['ENST00000261296.7']	['ENST00000261296.7']	ENST00000261296.7	Intron	protein_coding	36	chr13	94592309	94593840	-	[]	[]	ENST00000261296.7	Intron	protein_coding	36	chr13	94592309	94593840	-	ENST00000261296.7	Intron	protein_coding	36	chr13	94592309	94593840	-
Merged-chr13-95581138-1	chr13	95581101	95581175	-	0	{'ENST00000361396.6': '3UTR', 'ENST00000347108.7': '3UTR'}	{'ENST00000361396.6': 'protein_coding', 'ENST00000347108.7': 'protein_coding'}	{'ENST00000361396.6': 74, 'ENST00000347108.7': 74}	{'ENST00000361396.6': 'chr13', 'ENST00000347108.7': 'chr13'}	{'ENST00000361396.6': 95578202.0, 'ENST00000347108.7': 95578203.0}	{'ENST00000361396.6': 95582236.0, 'ENST00000347108.7': 95582236.0}	{'ENST00000361396.6': '-', 'ENST00000347108.7': '-'}	ENST00000347108.7	3UTR	protein_coding	74	chr13	95578203	95582236	-	['ENST00000361396.6', 'ENST00000347108.7']	[]	ENST00000347108.7	3UTR	protein_coding	74	chr13	95578203	95582236	-	[]	['ENST00000361396.6', 'ENST00000347108.7']	ENST00000361396.6	3UTR	protein_coding	74	chr13	95578202	95582236	-	ENST00000347108.7	3UTR	protein_coding	74	chr13	95578203	95582236	-
Merged-chr13-110476843-1	chr13	110476806	110476880	+	0	{'ENST00000360467.7': 'Intron'}	{'ENST00000360467.7': 'protein_coding'}	{'ENST00000360467.7': 74}	{'ENST00000360467.7': 'chr13'}	{'ENST00000360467.7': 110473150.0}	{'ENST00000360467.7': 110478002.0}	{'ENST00000360467.7': '+'}	ENST00000360467.7	Intron	protein_coding	74	chr13	110473150	110478002	+	['ENST00000360467.7']	['ENST00000360467.7']	ENST00000360467.7	Intron	protein_coding	74	chr13	110473150	110478002	+	[]	[]	ENST00000360467.7	Intron	protein_coding	74	chr13	110473150	110478002	+	ENST00000360467.7	Intron	protein_coding	74	chr13	110473150	110478002	+
Merged-chr9-71683383-1	chr9	71683346	71683420	-	0	{'ENST00000377044.9': '3UTR'}	{'ENST00000377044.9': 'protein_coding'}	{'ENST00000377044.9': 55}	{'ENST00000377044.9': 'chr9'}	{'ENST00000377044.9': 71683366.0}	{'ENST00000377044.9': 71685199.0}	{'ENST00000377044.9': '-'}	ENST00000377044.9	3UTR	protein_coding	55	chr9	71683366	71685199	-	['ENST00000377044.9']	['ENST00000377044.9']	ENST00000377044.9	3UTR	protein_coding	55	chr9	71683366	71685199	-	[]	['ENST00000377044.9']	ENST00000377044.9	3UTR	protein_coding	55	chr9	71683366	71685199	-	ENST00000377044.9	3UTR	protein_coding	55	chr9	71683366	71685199	-
Merged-chr9-84815701-1	chr9	84815664	84815738	+	0	{'ENST00000359847.4': '3UTR', 'ENST00000395882.6': '3UTR', 'ENST00000693539.1': 'Intron', 'ENST00000692181.1': 'Intron'}	{'ENST00000359847.4': 'protein_coding', 'ENST00000395882.6': 'protein_coding', 'ENST00000693539.1': 'protein_coding', 'ENST00000692181.1': 'protein_coding'}	{'ENST00000359847.4': 38, 'ENST00000395882.6': 42, 'ENST00000693539.1': 74, 'ENST00000692181.1': 74}	{'ENST00000359847.4': 'chr9', 'ENST00000395882.6': 'chr9', 'ENST00000693539.1': 'chr9', 'ENST00000692181.1': 'chr9'}	{'ENST00000359847.4': 84810577.0, 'ENST00000395882.6': 84810577.0, 'ENST00000693539.1': 84752085.0, 'ENST00000692181.1': 84752085.0}	{'ENST00000359847.4': 84815702.0, 'ENST00000395882.6': 84815706.0, 'ENST00000693539.1': 84861039.0, 'ENST00000692181.1': 84867242.0}	{'ENST00000359847.4': '+', 'ENST00000395882.6': '+', 'ENST00000693539.1': '+', 'ENST00000692181.1': '+'}	ENST00000693539.1	Intron	protein_coding	74	chr9	84752085	84861039	+	['ENST00000359847.4', 'ENST00000395882.6', 'ENST00000693539.1', 'ENST00000692181.1']	[]	ENST00000693539.1	Intron	protein_coding	74	chr9	84752085	84861039	+	[]	['ENST00000359847.4', 'ENST00000395882.6']	ENST00000395882.6	3UTR	protein_coding	42	chr9	84810577	84815706	+	ENST00000693539.1	Intron	protein_coding	74	chr9	84752085	84861039	+
Merged-chr9-92711390-1	chr9	92711353	92711427	-	0	{'ENST00000375512.3': '3UTR', 'ENST00000356884.11': '3UTR'}	{'ENST00000375512.3': 'protein_coding', 'ENST00000356884.11': 'protein_coding'}	{'ENST00000375512.3': 65, 'ENST00000356884.11': 65}	{'ENST00000375512.3': 'chr9', 'ENST00000356884.11': 'chr9'}	{'ENST00000375512.3': 92711363.0, 'ENST00000356884.11': 92711363.0}	{'ENST00000375512.3': 92713458.0, 'ENST00000356884.11': 92715156.0}	{'ENST00000375512.3': '-', 'ENST00000356884.11': '-'}	ENST00000375512.3	3UTR	protein_coding	65	chr9	92711363	92713458	-	['ENST00000375512.3', 'ENST00000356884.11']	['ENST00000356884.11']	ENST00000356884.11	3UTR	protein_coding	65	chr9	92711363	92715156	-	[]	['ENST00000375512.3', 'ENST00000356884.11']	ENST00000375512.3	3UTR	protein_coding	65	chr9	92711363	92713458	-	ENST00000356884.11	3UTR	protein_coding	65	chr9	92711363	92715156	-
Merged-chr9-112717981-1	chr9	112717944	112718018	-	0	{'ENST00000374234.1': 'exon', 'ENST00000374242.9': 'Intron', 'ENST00000374236.5': 'Intron'}	{'ENST00000374234.1': 'protein_coding', 'ENST00000374242.9': 'protein_coding', 'ENST00000374236.5': 'protein_coding'}	{'ENST00000374234.1': 32, 'ENST00000374242.9': 42, 'ENST00000374236.5': 42}	{'ENST00000374234.1': 'chr9', 'ENST00000374242.9': 'chr9', 'ENST00000374236.5': 'chr9'}	{'ENST00000374234.1': 112717987.0, 'ENST00000374242.9': 112716541.0, 'ENST00000374236.5': 112694233.0}	{'ENST00000374234.1': 112718107.0, 'ENST00000374242.9': 112717986.0, 'ENST00000374236.5': 112717986.0}	{'ENST00000374234.1': '-', 'ENST00000374242.9': '-', 'ENST00000374236.5': '-'}	ENST00000374242.9	Intron	protein_coding	42	chr9	112716541	112717986	-	['ENST00000374234.1', 'ENST00000374242.9', 'ENST00000374236.5']	['ENST00000374242.9']	ENST00000374242.9	Intron	protein_coding	42	chr9	112716541	112717986	-	[]	[]	ENST00000374242.9	Intron	protein_coding	42	chr9	112716541	112717986	-	ENST00000374242.9	Intron	protein_coding	42	chr9	112716541	112717986	-
Merged-chr9-127447675-1	chr9	127447638	127447712	-	0	{'ENST00000361436.10': '3UTR', 'ENST00000536368.1': '3UTR'}	{'ENST00000361436.10': 'protein_coding', 'ENST00000536368.1': 'protein_coding'}	{'ENST00000361436.10': 39, 'ENST00000536368.1': 36}	{'ENST00000361436.10': 'chr9', 'ENST00000536368.1': 'chr9'}	{'ENST00000361436.10': 127447674.0, 'ENST00000536368.1': 127447677.0}	{'ENST00000361436.10': 127447723.0, 'ENST00000536368.1': 127447723.0}	{'ENST00000361436.10': '-', 'ENST00000536368.1': '-'}	ENST00000361436.10	3UTR	protein_coding	39	chr9	127447674	127447723	-	['ENST00000361436.10', 'ENST00000536368.1']	['ENST00000361436.10']	ENST00000361436.10	3UTR	protein_coding	39	chr9	127447674	127447723	-	[]	['ENST00000361436.10', 'ENST00000536368.1']	ENST00000361436.10	3UTR	protein_coding	39	chr9	127447674	127447723	-	ENST00000361436.10	3UTR	protein_coding	39	chr9	127447674	127447723	-
Merged-chr9-130887662-1	chr9	130887625	130887699	+	0	{'ENST00000372348.9': '3UTR'}	{'ENST00000372348.9': 'protein_coding'}	{'ENST00000372348.9': 50}	{'ENST00000372348.9': 'chr9'}	{'ENST00000372348.9': 130885681.0}	{'ENST00000372348.9': 130887675.0}	{'ENST00000372348.9': '+'}	ENST00000372348.9	3UTR	protein_coding	50	chr9	130885681	130887675	+	['ENST00000372348.9']	[]	ENST00000372348.9	3UTR	protein_coding	50	chr9	130885681	130887675	+	[]	['ENST00000372348.9']	ENST00000372348.9	3UTR	protein_coding	50	chr9	130885681	130887675	+	ENST00000372348.9	3UTR	protein_coding	50	chr9	130885681	130887675	+
Merged-chr9-134041766-1	chr9	134041729	134041803	-	0	{'ENST00000303407.12': 'Intron'}	{'ENST00000303407.12': 'protein_coding'}	{'ENST00000303407.12': 30}	{'ENST00000303407.12': 'chr9'}	{'ENST00000303407.12': 134040269.0}	{'ENST00000303407.12': 134041759.0}	{'ENST00000303407.12': '-'}	ENST00000303407.12	Intron	protein_coding	30	chr9	134040269	134041759	-	['ENST00000303407.12']	['ENST00000303407.12']	ENST00000303407.12	Intron	protein_coding	30	chr9	134040269	134041759	-	[]	[]	ENST00000303407.12	Intron	protein_coding	30	chr9	134040269	134041759	-	ENST00000303407.12	Intron	protein_coding	30	chr9	134040269	134041759	-
Merged-chr15-52547733-1	chr15	52547696	52547770	-	0	{'ENST00000249822.9': '3UTR'}	{'ENST00000249822.9': 'protein_coding'}	{'ENST00000249822.9': 74}	{'ENST00000249822.9': 'chr15'}	{'ENST00000249822.9': 52547045.0}	{'ENST00000249822.9': 52551936.0}	{'ENST00000249822.9': '-'}	ENST00000249822.9	3UTR	protein_coding	74	chr15	52547045	52551936	-	['ENST00000249822.9']	['ENST00000249822.9']	ENST00000249822.9	3UTR	protein_coding	74	chr15	52547045	52551936	-	[]	['ENST00000249822.9']	ENST00000249822.9	3UTR	protein_coding	74	chr15	52547045	52551936	-	ENST00000249822.9	3UTR	protein_coding	74	chr15	52547045	52551936	-
Merged-chr15-52551197-1	chr15	52551160	52551234	-	0	{'ENST00000249822.9': '3UTR', 'ENST00000561650.5': '3UTR'}	{'ENST00000249822.9': 'protein_coding', 'ENST00000561650.5': 'protein_coding'}	{'ENST00000249822.9': 74, 'ENST00000561650.5': 74}	{'ENST00000249822.9': 'chr15', 'ENST00000561650.5': 'chr15'}	{'ENST00000249822.9': 52547045.0, 'ENST00000561650.5': 52549527.0}	{'ENST00000249822.9': 52551936.0, 'ENST00000561650.5': 52551936.0}	{'ENST00000249822.9': '-', 'ENST00000561650.5': '-'}	ENST00000561650.5	3UTR	protein_coding	74	chr15	52549527	52551936	-	['ENST00000249822.9', 'ENST00000561650.5']	['ENST00000249822.9']	ENST00000249822.9	3UTR	protein_coding	74	chr15	52547045	52551936	-	[]	['ENST00000249822.9', 'ENST00000561650.5']	ENST00000249822.9	3UTR	protein_coding	74	chr15	52547045	52551936	-	ENST00000249822.9	3UTR	protein_coding	74	chr15	52547045	52551936	-
Merged-chr15-74574904-1	chr15	74574867	74574941	+	0	{'ENST00000622429.1': 'Intron'}	{'ENST00000622429.1': 'protein_coding'}	{'ENST00000622429.1': 74}	{'ENST00000622429.1': 'chr15'}	{'ENST00000622429.1': 74573204.0}	{'ENST00000622429.1': 74589819.0}	{'ENST00000622429.1': '+'}	ENST00000622429.1	Intron	protein_coding	74	chr15	74573204	74589819	+	['ENST00000622429.1']	[]	ENST00000622429.1	Intron	protein_coding	74	chr15	74573204	74589819	+	[]	[]	ENST00000622429.1	Intron	protein_coding	74	chr15	74573204	74589819	+	ENST00000622429.1	Intron	protein_coding	74	chr15	74573204	74589819	+
Merged-chr15-78897211-1	chr15	78897174	78897248	+	0	{'ENST00000379535.8': '3UTR', 'ENST00000331268.9': '3UTR', 'ENST00000426013.7': '3UTR', 'ENST00000559345.5': '3UTR'}	{'ENST00000379535.8': 'protein_coding', 'ENST00000331268.9': 'protein_coding', 'ENST00000426013.7': 'protein_coding', 'ENST00000559345.5': 'protein_coding'}	{'ENST00000379535.8': 74, 'ENST00000331268.9': 74, 'ENST00000426013.7': 74, 'ENST00000559345.5': 74}	{'ENST00000379535.8': 'chr15', 'ENST00000331268.9': 'chr15', 'ENST00000426013.7': 'chr15', 'ENST00000559345.5': 'chr15'}	{'ENST00000379535.8': 78897065.0, 'ENST00000331268.9': 78897065.0, 'ENST00000426013.7': 78897065.0, 'ENST00000559345.5': 78897065.0}	{'ENST00000379535.8': 78897730.0, 'ENST00000331268.9': 78898133.0, 'ENST00000426013.7': 78898139.0, 'ENST00000559345.5': 78897389.0}	{'ENST00000379535.8': '+', 'ENST00000331268.9': '+', 'ENST00000426013.7': '+', 'ENST00000559345.5': '+'}	ENST00000379535.8	3UTR	protein_coding	74	chr15	78897065	78897730	+	['ENST00000379535.8', 'ENST00000331268.9', 'ENST00000426013.7', 'ENST00000559345.5']	['ENST00000426013.7']	ENST00000426013.7	3UTR	protein_coding	74	chr15	78897065	78898139	+	[]	['ENST00000379535.8', 'ENST00000331268.9', 'ENST00000426013.7', 'ENST00000559345.5']	ENST00000379535.8	3UTR	protein_coding	74	chr15	78897065	78897730	+	ENST00000426013.7	3UTR	protein_coding	74	chr15	78897065	78898139	+
Merged-chr15-101175727-1	chr15	101175690	101175764	-	0	{'ENST00000254190.4': '3UTR'}	{'ENST00000254190.4': 'protein_coding'}	{'ENST00000254190.4': 38}	{'ENST00000254190.4': 'chr15'}	{'ENST00000254190.4': 101175727.0}	{'ENST00000254190.4': 101177390.0}	{'ENST00000254190.4': '-'}	ENST00000254190.4	3UTR	protein_coding	38	chr15	101175727	101177390	-	['ENST00000254190.4']	['ENST00000254190.4']	ENST00000254190.4	3UTR	protein_coding	38	chr15	101175727	101177390	-	[]	['ENST00000254190.4']	ENST00000254190.4	3UTR	protein_coding	38	chr15	101175727	101177390	-	ENST00000254190.4	3UTR	protein_coding	38	chr15	101175727	101177390	-
Merged-chr15-51862849-1	chr15	51862812	51862886	+	0	{'ENST00000308580.12': 'AltUTR'}	{'ENST00000308580.12': 'protein_coding'}	{'ENST00000308580.12': 72}	{'ENST00000308580.12': 'chr15'}	{'ENST00000308580.12': 51862811.0}	{'ENST00000308580.12': 51862884.0}	{'ENST00000308580.12': '+'}	ENST00000308580.12	AltUTR	protein_coding	72	chr15	51862811	51862884	+	['ENST00000308580.12']	['ENST00000308580.12']	ENST00000308580.12	AltUTR	protein_coding	72	chr15	51862811	51862884	+	[]	[]	ENST00000308580.12	AltUTR	protein_coding	72	chr15	51862811	51862884	+	ENST00000308580.12	AltUTR	protein_coding	72	chr15	51862811	51862884	+
Merged-chr15-53657138-1	chr15	53657101	53657175	+	0	{'ENST00000360509.10': 'Intron'}	{'ENST00000360509.10': 'protein_coding'}	{'ENST00000360509.10': 74}	{'ENST00000360509.10': 'chr15'}	{'ENST00000360509.10': 53616243.0}	{'ENST00000360509.10': 53665571.0}	{'ENST00000360509.10': '-'}	ENST00000360509.10	Intron	protein_coding	74	chr15	53616243	53665571	-	['ENST00000360509.10']	['ENST00000360509.10']	ENST00000360509.10	Intron	protein_coding	74	chr15	53616243	53665571	-	[]	[]	ENST00000360509.10	Intron	protein_coding	74	chr15	53616243	53665571	-	ENST00000360509.10	Intron	protein_coding	74	chr15	53616243	53665571	-
Merged-chr15-59642125-1	chr15	59642088	59642162	-	0	{'ENST00000396060.7': 'Intron', 'ENST00000396064.7': 'Intron'}	{'ENST00000396060.7': 'protein_coding', 'ENST00000396064.7': 'protein_coding'}	{'ENST00000396060.7': 47, 'ENST00000396064.7': 74}	{'ENST00000396060.7': 'chr15', 'ENST00000396064.7': 'chr15'}	{'ENST00000396060.7': 59639157.0, 'ENST00000396064.7': 59639157.0}	{'ENST00000396060.7': 59642135.0, 'ENST00000396064.7': 59650668.0}	{'ENST00000396060.7': '-', 'ENST00000396064.7': '-'}	ENST00000396064.7	Intron	protein_coding	74	chr15	59639157	59650668	-	['ENST00000396060.7', 'ENST00000396064.7']	['ENST00000396060.7']	ENST00000396060.7	Intron	protein_coding	47	chr15	59639157	59642135	-	[]	[]	ENST00000396060.7	Intron	protein_coding	47	chr15	59639157	59642135	-	ENST00000396060.7	Intron	protein_coding	47	chr15	59639157	59642135	-
Merged-chr15-75467375-1	chr15	75467338	75467412	-	0	{'ENST00000618819.5': '3UTR'}	{'ENST00000618819.5': 'protein_coding'}	{'ENST00000618819.5': 74}	{'ENST00000618819.5': 'chr15'}	{'ENST00000618819.5': 75463251.0}	{'ENST00000618819.5': 75468771.0}	{'ENST00000618819.5': '-'}	ENST00000618819.5	3UTR	protein_coding	74	chr15	75463251	75468771	-	['ENST00000618819.5']	['ENST00000618819.5']	ENST00000618819.5	3UTR	protein_coding	74	chr15	75463251	75468771	-	[]	['ENST00000618819.5']	ENST00000618819.5	3UTR	protein_coding	74	chr15	75463251	75468771	-	ENST00000618819.5	3UTR	protein_coding	74	chr15	75463251	75468771	-
Merged-chr15-24983777-1	chr15	24983740	24983814	+	0	{'ENST00000551312.6': 'Intron', 'ENST00000551631.7': 'Intron'}	{'ENST00000551312.6': 'protein_coding', 'ENST00000551631.7': 'lncRNA'}	{'ENST00000551312.6': 74, 'ENST00000551631.7': 74}	{'ENST00000551312.6': 'chr15', 'ENST00000551631.7': 'chr15'}	{'ENST00000551312.6': 24982437.0, 'ENST00000551631.7': 24982437.0}	{'ENST00000551312.6': 24998969.0, 'ENST00000551631.7': 24998365.0}	{'ENST00000551312.6': '+', 'ENST00000551631.7': '+'}	ENST00000551312.6	Intron	protein_coding	74	chr15	24982437	24998969	+	['ENST00000551312.6', 'ENST00000551631.7']	[]	ENST00000551312.6	Intron	protein_coding	74	chr15	24982437	24998969	+	[]	[]	ENST00000551312.6	Intron	protein_coding	74	chr15	24982437	24998969	+	ENST00000551312.6	Intron	protein_coding	74	chr15	24982437	24998969	+
Merged-chr15-29118286-1	chr15	29118249	29118323	+	0	{'ENST00000558402.5': '3UTR', 'ENST00000411764.5': '3UTR'}	{'ENST00000558402.5': 'protein_coding', 'ENST00000411764.5': 'protein_coding'}	{'ENST00000558402.5': 66, 'ENST00000411764.5': 62}	{'ENST00000558402.5': 'chr15', 'ENST00000411764.5': 'chr15'}	{'ENST00000558402.5': 29117131.0, 'ENST00000411764.5': 29117131.0}	{'ENST00000558402.5': 29118315.0, 'ENST00000411764.5': 29118311.0}	{'ENST00000558402.5': '+', 'ENST00000411764.5': '+'}	ENST00000558402.5	3UTR	protein_coding	66	chr15	29117131	29118315	+	['ENST00000558402.5', 'ENST00000411764.5']	[]	ENST00000558402.5	3UTR	protein_coding	66	chr15	29117131	29118315	+	[]	['ENST00000558402.5', 'ENST00000411764.5']	ENST00000558402.5	3UTR	protein_coding	66	chr15	29117131	29118315	+	ENST00000558402.5	3UTR	protein_coding	66	chr15	29117131	29118315	+
Merged-chr15-40326724-1	chr15	40326687	40326761	+	0	{'ENST00000638170.2': '3UTR'}	{'ENST00000638170.2': 'protein_coding'}	{'ENST00000638170.2': 28}	{'ENST00000638170.2': 'chr15'}	{'ENST00000638170.2': 40324515.0}	{'ENST00000638170.2': 40326715.0}	{'ENST00000638170.2': '+'}	ENST00000638170.2	3UTR	protein_coding	28	chr15	40324515	40326715	+	['ENST00000638170.2']	['ENST00000638170.2']	ENST00000638170.2	3UTR	protein_coding	28	chr15	40324515	40326715	+	[]	['ENST00000638170.2']	ENST00000638170.2	3UTR	protein_coding	28	chr15	40324515	40326715	+	ENST00000638170.2	3UTR	protein_coding	28	chr15	40324515	40326715	+
Merged-chr15-48988783-1	chr15	48988746	48988820	-	0	{'ENST00000559471.6': '3UTR', 'ENST00000261847.7': '3UTR'}	{'ENST00000559471.6': 'protein_coding', 'ENST00000261847.7': 'protein_coding'}	{'ENST00000559471.6': 74, 'ENST00000261847.7': 51}	{'ENST00000559471.6': 'chr15', 'ENST00000261847.7': 'chr15'}	{'ENST00000559471.6': 48988638.0, 'ENST00000261847.7': 48988770.0}	{'ENST00000559471.6': 48992246.0, 'ENST00000261847.7': 48992246.0}	{'ENST00000559471.6': '-', 'ENST00000261847.7': '-'}	ENST00000559471.6	3UTR	protein_coding	74	chr15	48988638	48992246	-	['ENST00000559471.6', 'ENST00000261847.7']	['ENST00000559471.6']	ENST00000559471.6	3UTR	protein_coding	74	chr15	48988638	48992246	-	[]	['ENST00000559471.6', 'ENST00000261847.7']	ENST00000559471.6	3UTR	protein_coding	74	chr15	48988638	48992246	-	ENST00000559471.6	3UTR	protein_coding	74	chr15	48988638	48992246	-
Merged-chr15-52307295-1	chr15	52307258	52307332	-	0	{'ENST00000399231.8': '3UTR', 'ENST00000356338.11': '3UTR', 'ENST00000687574.1': '3UTR'}	{'ENST00000399231.8': 'protein_coding', 'ENST00000356338.11': 'protein_coding', 'ENST00000687574.1': 'protein_coding'}	{'ENST00000399231.8': 52, 'ENST00000356338.11': 50, 'ENST00000687574.1': 47}	{'ENST00000399231.8': 'chr15', 'ENST00000356338.11': 'chr15', 'ENST00000687574.1': 'chr15'}	{'ENST00000399231.8': 52307281.0, 'ENST00000356338.11': 52307283.0, 'ENST00000687574.1': 52307286.0}	{'ENST00000399231.8': 52313698.0, 'ENST00000356338.11': 52313698.0, 'ENST00000687574.1': 52313698.0}	{'ENST00000399231.8': '-', 'ENST00000356338.11': '-', 'ENST00000687574.1': '-'}	ENST00000399231.8	3UTR	protein_coding	52	chr15	52307281	52313698	-	['ENST00000399231.8', 'ENST00000356338.11', 'ENST00000687574.1']	[]	ENST00000399231.8	3UTR	protein_coding	52	chr15	52307281	52313698	-	[]	['ENST00000399231.8', 'ENST00000356338.11', 'ENST00000687574.1']	ENST00000399231.8	3UTR	protein_coding	52	chr15	52307281	52313698	-	ENST00000399231.8	3UTR	protein_coding	52	chr15	52307281	52313698	-
Merged-chr15-58819403-1	chr15	58819366	58819440	+	0	{'ENST00000559228.6': 'Intron'}	{'ENST00000559228.6': 'protein_coding'}	{'ENST00000559228.6': 74}	{'ENST00000559228.6': 'chr15'}	{'ENST00000559228.6': 58810388.0}	{'ENST00000559228.6': 58821716.0}	{'ENST00000559228.6': '+'}	ENST00000559228.6	Intron	protein_coding	74	chr15	58810388	58821716	+	['ENST00000559228.6']	['ENST00000559228.6']	ENST00000559228.6	Intron	protein_coding	74	chr15	58810388	58821716	+	[]	[]	ENST00000559228.6	Intron	protein_coding	74	chr15	58810388	58821716	+	ENST00000559228.6	Intron	protein_coding	74	chr15	58810388	58821716	+
Merged-chr15-63044072-1	chr15	63044035	63044109	+	0	{'ENST00000288398.10': 'exon', 'ENST00000610733.1': 'exon', 'ENST00000267996.11': 'Intron'}	{'ENST00000288398.10': 'protein_coding', 'ENST00000610733.1': 'protein_coding', 'ENST00000267996.11': 'protein_coding'}	{'ENST00000288398.10': 74, 'ENST00000610733.1': 74, 'ENST00000267996.11': 74}	{'ENST00000288398.10': 'chr15', 'ENST00000610733.1': 'chr15', 'ENST00000267996.11': 'chr15'}	{'ENST00000288398.10': 63044027.0, 'ENST00000610733.1': 63044027.0, 'ENST00000267996.11': 63043831.0}	{'ENST00000288398.10': 63044152.0, 'ENST00000610733.1': 63047726.0, 'ENST00000267996.11': 63056984.0}	{'ENST00000288398.10': '+', 'ENST00000610733.1': '+', 'ENST00000267996.11': '+'}	ENST00000288398.10	exon	protein_coding	74	chr15	63044027	63044152	+	['ENST00000288398.10', 'ENST00000610733.1', 'ENST00000267996.11']	[]	ENST00000288398.10	exon	protein_coding	74	chr15	63044027	63044152	+	[]	[]	ENST00000288398.10	exon	protein_coding	74	chr15	63044027	63044152	+	ENST00000288398.10	exon	protein_coding	74	chr15	63044027	63044152	+
Merged-chr15-65164029-1	chr15	65163992	65164066	-	0	{'ENST00000300107.7': 'Intron'}	{'ENST00000300107.7': 'protein_coding'}	{'ENST00000300107.7': 36}	{'ENST00000300107.7': 'chr15'}	{'ENST00000300107.7': 65162645.0}	{'ENST00000300107.7': 65164028.0}	{'ENST00000300107.7': '-'}	ENST00000300107.7	Intron	protein_coding	36	chr15	65162645	65164028	-	['ENST00000300107.7']	['ENST00000300107.7']	ENST00000300107.7	Intron	protein_coding	36	chr15	65162645	65164028	-	[]	[]	ENST00000300107.7	Intron	protein_coding	36	chr15	65162645	65164028	-	ENST00000300107.7	Intron	protein_coding	36	chr15	65162645	65164028	-
Merged-chr15-68293711-1	chr15	68293674	68293748	+	0	{'ENST00000306917.5': '3UTR'}	{'ENST00000306917.5': 'protein_coding'}	{'ENST00000306917.5': 74}	{'ENST00000306917.5': 'chr15'}	{'ENST00000306917.5': 68291240.0}	{'ENST00000306917.5': 68295862.0}	{'ENST00000306917.5': '+'}	ENST00000306917.5	3UTR	protein_coding	74	chr15	68291240	68295862	+	['ENST00000306917.5']	['ENST00000306917.5']	ENST00000306917.5	3UTR	protein_coding	74	chr15	68291240	68295862	+	[]	['ENST00000306917.5']	ENST00000306917.5	3UTR	protein_coding	74	chr15	68291240	68295862	+	ENST00000306917.5	3UTR	protein_coding	74	chr15	68291240	68295862	+
Merged-chr15-75598090-1	chr15	75598053	75598127	-	0	{'ENST00000567134.5': '3UTR', 'ENST00000308588.10': '3UTR', 'ENST00000564644.5': '3UTR', 'ENST00000564675.5': '3UTR', 'ENST00000565138.5': 'Intron', 'ENST00000568707.1': 'Intron'}	{'ENST00000567134.5': 'protein_coding', 'ENST00000308588.10': 'protein_coding', 'ENST00000564644.5': 'protein_coding', 'ENST00000564675.5': 'protein_coding', 'ENST00000565138.5': 'lncRNA', 'ENST00000568707.1': 'lncRNA'}	{'ENST00000567134.5': 45, 'ENST00000308588.10': 42, 'ENST00000564644.5': 39, 'ENST00000564675.5': 6, 'ENST00000565138.5': 74, 'ENST00000568707.1': 74}	{'ENST00000567134.5': 'chr15', 'ENST00000308588.10': 'chr15', 'ENST00000564644.5': 'chr15', 'ENST00000564675.5': 'chr15', 'ENST00000565138.5': 'chr15', 'ENST00000568707.1': 'chr15'}	{'ENST00000567134.5': 75598083.0, 'ENST00000308588.10': 75598086.0, 'ENST00000564644.5': 75598089.0, 'ENST00000564675.5': 75598122.0, 'ENST00000565138.5': 75597480.0, 'ENST00000568707.1': 75527261.0}	{'ENST00000567134.5': 75598360.0, 'ENST00000308588.10': 75598360.0, 'ENST00000564644.5': 75598360.0, 'ENST00000564675.5': 75598360.0, 'ENST00000565138.5': 75598278.0, 'ENST00000568707.1': 75598278.0}	{'ENST00000567134.5': '-', 'ENST00000308588.10': '-', 'ENST00000564644.5': '-', 'ENST00000564675.5': '-', 'ENST00000565138.5': '-', 'ENST00000568707.1': '-'}	ENST00000565138.5	Intron	lncRNA	74	chr15	75597480	75598278	-	['ENST00000567134.5', 'ENST00000308588.10', 'ENST00000564644.5', 'ENST00000564675.5', 'ENST00000565138.5', 'ENST00000568707.1']	['ENST00000308588.10']	ENST00000308588.10	3UTR	protein_coding	42	chr15	75598086	75598360	-	[]	['ENST00000567134.5', 'ENST00000308588.10', 'ENST00000564644.5', 'ENST00000564675.5']	ENST00000567134.5	3UTR	protein_coding	45	chr15	75598083	75598360	-	ENST00000308588.10	3UTR	protein_coding	42	chr15	75598086	75598360	-
Merged-chr15-93080477-1	chr15	93080440	93080514	-	0	{'ENST00000329082.12': 'Intron', 'ENST00000543599.5': 'Intron'}	{'ENST00000329082.12': 'protein_coding', 'ENST00000543599.5': 'protein_coding'}	{'ENST00000329082.12': 74, 'ENST00000543599.5': 74}	{'ENST00000329082.12': 'chr15', 'ENST00000543599.5': 'chr15'}	{'ENST00000329082.12': 93073031.0, 'ENST00000543599.5': 93073031.0}	{'ENST00000329082.12': 93088918.0, 'ENST00000543599.5': 93088280.0}	{'ENST00000329082.12': '-', 'ENST00000543599.5': '-'}	ENST00000329082.12	Intron	protein_coding	74	chr15	93073031	93088918	-	['ENST00000329082.12', 'ENST00000543599.5']	['ENST00000329082.12']	ENST00000329082.12	Intron	protein_coding	74	chr15	93073031	93088918	-	[]	[]	ENST00000329082.12	Intron	protein_coding	74	chr15	93073031	93088918	-	ENST00000329082.12	Intron	protein_coding	74	chr15	93073031	93088918	-
Merged-chr15-99135567-1	chr15	99135530	99135604	+	0	{'ENST00000560674.5': '3UTR', 'ENST00000328642.11': '3UTR', 'ENST00000594047.2': '3UTR', 'ENST00000336292.11': 'exon'}	{'ENST00000560674.5': 'protein_coding', 'ENST00000328642.11': 'protein_coding', 'ENST00000594047.2': 'protein_coding', 'ENST00000336292.11': 'protein_coding'}	{'ENST00000560674.5': 63, 'ENST00000328642.11': 53, 'ENST00000594047.2': 53, 'ENST00000336292.11': 63}	{'ENST00000560674.5': 'chr15', 'ENST00000328642.11': 'chr15', 'ENST00000594047.2': 'chr15', 'ENST00000336292.11': 'chr15'}	{'ENST00000560674.5': 99133056.0, 'ENST00000328642.11': 99132761.0, 'ENST00000594047.2': 99133056.0, 'ENST00000336292.11': 99129367.0}	{'ENST00000560674.5': 99135593.0, 'ENST00000328642.11': 99135583.0, 'ENST00000594047.2': 99135583.0, 'ENST00000336292.11': 99135593.0}	{'ENST00000560674.5': '+', 'ENST00000328642.11': '+', 'ENST00000594047.2': '+', 'ENST00000336292.11': '+'}	ENST00000560674.5	3UTR	protein_coding	63	chr15	99133056	99135593	+	['ENST00000560674.5', 'ENST00000328642.11', 'ENST00000594047.2', 'ENST00000336292.11']	['ENST00000336292.11']	ENST00000336292.11	exon	protein_coding	63	chr15	99129367	99135593	+	[]	['ENST00000560674.5', 'ENST00000328642.11', 'ENST00000594047.2']	ENST00000560674.5	3UTR	protein_coding	63	chr15	99133056	99135593	+	ENST00000336292.11	exon	protein_coding	63	chr15	99129367	99135593	+
Merged-chr15-22867274-1	chr15	22867237	22867311	+	0	{'ENST00000398014.7': '3UTR', 'ENST00000337451.8': '3UTR', 'ENST00000674477.1': '3UTR', 'ENST00000398013.7': '3UTR', 'ENST00000617928.5': '3UTR', 'ENST00000617556.4': '3UTR'}	{'ENST00000398014.7': 'protein_coding', 'ENST00000337451.8': 'protein_coding', 'ENST00000674477.1': 'protein_coding', 'ENST00000398013.7': 'protein_coding', 'ENST00000617928.5': 'protein_coding', 'ENST00000617556.4': 'protein_coding'}	{'ENST00000398014.7': 74, 'ENST00000337451.8': 74, 'ENST00000674477.1': 74, 'ENST00000398013.7': 74, 'ENST00000617928.5': 74, 'ENST00000617556.4': 74}	{'ENST00000398014.7': 'chr15', 'ENST00000337451.8': 'chr15', 'ENST00000674477.1': 'chr15', 'ENST00000398013.7': 'chr15', 'ENST00000617928.5': 'chr15', 'ENST00000617556.4': 'chr15'}	{'ENST00000398014.7': 22866845.0, 'ENST00000337451.8': 22866845.0, 'ENST00000674477.1': 22866845.0, 'ENST00000398013.7': 22866845.0, 'ENST00000617928.5': 22867052.0, 'ENST00000617556.4': 22867125.0}	{'ENST00000398014.7': 22869362.0, 'ENST00000337451.8': 22868384.0, 'ENST00000674477.1': 22867398.0, 'ENST00000398013.7': 22867716.0, 'ENST00000617928.5': 22870030.0, 'ENST00000617556.4': 22870030.0}	{'ENST00000398014.7': '+', 'ENST00000337451.8': '+', 'ENST00000674477.1': '+', 'ENST00000398013.7': '+', 'ENST00000617928.5': '-', 'ENST00000617556.4': '-'}	ENST00000617556.4	3UTR	protein_coding	74	chr15	22867125	22870030	-	['ENST00000398014.7', 'ENST00000337451.8', 'ENST00000674477.1', 'ENST00000398013.7', 'ENST00000617928.5', 'ENST00000617556.4']	['ENST00000337451.8', 'ENST00000617928.5']	ENST00000337451.8	3UTR	protein_coding	74	chr15	22866845	22868384	+	[]	['ENST00000398014.7', 'ENST00000337451.8', 'ENST00000674477.1', 'ENST00000398013.7', 'ENST00000617928.5', 'ENST00000617556.4']	ENST00000398014.7	3UTR	protein_coding	74	chr15	22866845	22869362	+	ENST00000337451.8	3UTR	protein_coding	74	chr15	22866845	22868384	+
Merged-chr15-25050727-1	chr15	25050690	25050764	+	0	{'ENST00000640631.2': 'Intron', 'ENST00000668750.1': 'Intron', 'ENST00000656959.1': 'Intron', 'ENST00000549804.7': 'Intron', 'ENST00000552781.2': 'Intron'}	{'ENST00000640631.2': 'lncRNA', 'ENST00000668750.1': 'lncRNA', 'ENST00000656959.1': 'lncRNA', 'ENST00000549804.7': 'lncRNA', 'ENST00000552781.2': 'lncRNA'}	{'ENST00000640631.2': 74, 'ENST00000668750.1': 74, 'ENST00000656959.1': 74, 'ENST00000549804.7': 43, 'ENST00000552781.2': 74}	{'ENST00000640631.2': 'chr15', 'ENST00000668750.1': 'chr15', 'ENST00000656959.1': 'chr15', 'ENST00000549804.7': 'chr15', 'ENST00000552781.2': 'chr15'}	{'ENST00000640631.2': 25042910.0, 'ENST00000668750.1': 25042515.0, 'ENST00000656959.1': 25042910.0, 'ENST00000549804.7': 25050722.0, 'ENST00000552781.2': 25020761.0}	{'ENST00000640631.2': 25051101.0, 'ENST00000668750.1': 25051101.0, 'ENST00000656959.1': 25053827.0, 'ENST00000549804.7': 25059551.0, 'ENST00000552781.2': 25051101.0}	{'ENST00000640631.2': '+', 'ENST00000668750.1': '+', 'ENST00000656959.1': '+', 'ENST00000549804.7': '+', 'ENST00000552781.2': '+'}	ENST00000640631.2	Intron	lncRNA	74	chr15	25042910	25051101	+	['ENST00000640631.2', 'ENST00000668750.1', 'ENST00000656959.1', 'ENST00000549804.7', 'ENST00000552781.2']	[]	ENST00000640631.2	Intron	lncRNA	74	chr15	25042910	25051101	+	[]	[]	ENST00000640631.2	Intron	lncRNA	74	chr15	25042910	25051101	+	ENST00000640631.2	Intron	lncRNA	74	chr15	25042910	25051101	+
Merged-chr15-31374805-1	chr15	31374768	31374842	+	0	{'ENST00000307145.4': '3UTR'}	{'ENST00000307145.4': 'protein_coding'}	{'ENST00000307145.4': 74}	{'ENST00000307145.4': 'chr15'}	{'ENST00000307145.4': 31372297.0}	{'ENST00000307145.4': 31377899.0}	{'ENST00000307145.4': '+'}	ENST00000307145.4	3UTR	protein_coding	74	chr15	31372297	31377899	+	['ENST00000307145.4']	['ENST00000307145.4']	ENST00000307145.4	3UTR	protein_coding	74	chr15	31372297	31377899	+	[]	['ENST00000307145.4']	ENST00000307145.4	3UTR	protein_coding	74	chr15	31372297	31377899	+	ENST00000307145.4	3UTR	protein_coding	74	chr15	31372297	31377899	+
Merged-chr15-32639039-1	chr15	32639002	32639076	+	0	{'ENST00000647892.1': 'Intron', 'ENST00000361627.8': 'exon', 'ENST00000689909.1': 'Intron'}	{'ENST00000647892.1': 'lncRNA', 'ENST00000361627.8': 'protein_coding', 'ENST00000689909.1': 'protein_coding'}	{'ENST00000647892.1': 74, 'ENST00000361627.8': 74, 'ENST00000689909.1': 74}	{'ENST00000647892.1': 'chr15', 'ENST00000361627.8': 'chr15', 'ENST00000689909.1': 'chr15'}	{'ENST00000647892.1': 32637471.0, 'ENST00000361627.8': 32636257.0, 'ENST00000689909.1': 32633108.0}	{'ENST00000647892.1': 32641494.0, 'ENST00000361627.8': 32639941.0, 'ENST00000689909.1': 32643585.0}	{'ENST00000647892.1': '-', 'ENST00000361627.8': '+', 'ENST00000689909.1': '+'}	ENST00000647892.1	Intron	lncRNA	74	chr15	32637471	32641494	-	['ENST00000647892.1', 'ENST00000361627.8', 'ENST00000689909.1']	['ENST00000361627.8']	ENST00000361627.8	exon	protein_coding	74	chr15	32636257	32639941	+	[]	[]	ENST00000361627.8	exon	protein_coding	74	chr15	32636257	32639941	+	ENST00000361627.8	exon	protein_coding	74	chr15	32636257	32639941	+
Merged-chr15-41972398-1	chr15	41972361	41972435	-	0	{'ENST00000220325.9': 'CDS'}	{'ENST00000220325.9': 'protein_coding'}	{'ENST00000220325.9': 74}	{'ENST00000220325.9': 'chr15'}	{'ENST00000220325.9': 41972259.0}	{'ENST00000220325.9': 41972494.0}	{'ENST00000220325.9': '-'}	ENST00000220325.9	CDS	protein_coding	74	chr15	41972259	41972494	-	['ENST00000220325.9']	['ENST00000220325.9']	ENST00000220325.9	CDS	protein_coding	74	chr15	41972259	41972494	-	[]	[]	ENST00000220325.9	CDS	protein_coding	74	chr15	41972259	41972494	-	ENST00000220325.9	CDS	protein_coding	74	chr15	41972259	41972494	-
Merged-chr15-43083539-1	chr15	43083502	43083576	-	0	{'ENST00000290650.9': 'Intron'}	{'ENST00000290650.9': 'protein_coding'}	{'ENST00000290650.9': 74}	{'ENST00000290650.9': 'chr15'}	{'ENST00000290650.9': 43082716.0}	{'ENST00000290650.9': 43085983.0}	{'ENST00000290650.9': '-'}	ENST00000290650.9	Intron	protein_coding	74	chr15	43082716	43085983	-	['ENST00000290650.9']	['ENST00000290650.9']	ENST00000290650.9	Intron	protein_coding	74	chr15	43082716	43085983	-	[]	[]	ENST00000290650.9	Intron	protein_coding	74	chr15	43082716	43085983	-	ENST00000290650.9	Intron	protein_coding	74	chr15	43082716	43085983	-
Merged-chr15-51938024-1	chr15	51937987	51938061	-	0	{'ENST00000299601.10': '3UTR', 'ENST00000315141.5': '3UTR'}	{'ENST00000299601.10': 'protein_coding', 'ENST00000315141.5': 'protein_coding'}	{'ENST00000299601.10': 37, 'ENST00000315141.5': 35}	{'ENST00000299601.10': 'chr15', 'ENST00000315141.5': 'chr15'}	{'ENST00000299601.10': 51938025.0, 'ENST00000315141.5': 51938027.0}	{'ENST00000299601.10': 51938158.0, 'ENST00000315141.5': 51938158.0}	{'ENST00000299601.10': '-', 'ENST00000315141.5': '-'}	ENST00000299601.10	3UTR	protein_coding	37	chr15	51938025	51938158	-	['ENST00000299601.10', 'ENST00000315141.5']	['ENST00000299601.10']	ENST00000299601.10	3UTR	protein_coding	37	chr15	51938025	51938158	-	[]	['ENST00000299601.10', 'ENST00000315141.5']	ENST00000299601.10	3UTR	protein_coding	37	chr15	51938025	51938158	-	ENST00000299601.10	3UTR	protein_coding	37	chr15	51938025	51938158	-
Merged-chr15-64455293-1	chr15	64455256	64455330	+	0	{'ENST00000261884.8': '3UTR'}	{'ENST00000261884.8': 'protein_coding'}	{'ENST00000261884.8': 47}	{'ENST00000261884.8': 'chr15'}	{'ENST00000261884.8': 64455062.0}	{'ENST00000261884.8': 64455303.0}	{'ENST00000261884.8': '+'}	ENST00000261884.8	3UTR	protein_coding	47	chr15	64455062	64455303	+	['ENST00000261884.8']	['ENST00000261884.8']	ENST00000261884.8	3UTR	protein_coding	47	chr15	64455062	64455303	+	[]	['ENST00000261884.8']	ENST00000261884.8	3UTR	protein_coding	47	chr15	64455062	64455303	+	ENST00000261884.8	3UTR	protein_coding	47	chr15	64455062	64455303	+
Merged-chr15-64739902-1	chr15	64739865	64739939	-	0	{'ENST00000300069.5': 'exon', 'ENST00000560606.5': 'exon'}	{'ENST00000300069.5': 'protein_coding', 'ENST00000560606.5': 'protein_coding'}	{'ENST00000300069.5': 49, 'ENST00000560606.5': 48}	{'ENST00000300069.5': 'chr15', 'ENST00000560606.5': 'chr15'}	{'ENST00000300069.5': 64739891.0, 'ENST00000560606.5': 64739892.0}	{'ENST00000300069.5': 64741000.0, 'ENST00000560606.5': 64741000.0}	{'ENST00000300069.5': '-', 'ENST00000560606.5': '-'}	ENST00000300069.5	exon	protein_coding	49	chr15	64739891	64741000	-	['ENST00000300069.5', 'ENST00000560606.5']	['ENST00000300069.5']	ENST00000300069.5	exon	protein_coding	49	chr15	64739891	64741000	-	[]	[]	ENST00000300069.5	exon	protein_coding	49	chr15	64739891	64741000	-	ENST00000300069.5	exon	protein_coding	49	chr15	64739891	64741000	-
Merged-chr15-65877449-1	chr15	65877412	65877486	+	0	{'ENST00000565075.5': 'exon', 'ENST00000564910.5': 'Intron'}	{'ENST00000565075.5': 'protein_coding', 'ENST00000564910.5': 'protein_coding'}	{'ENST00000565075.5': 74, 'ENST00000564910.5': 74}	{'ENST00000565075.5': 'chr15', 'ENST00000564910.5': 'chr15'}	{'ENST00000565075.5': 65877332.0, 'ENST00000564910.5': 65877367.0}	{'ENST00000565075.5': 65877527.0, 'ENST00000564910.5': 65877811.0}	{'ENST00000565075.5': '+', 'ENST00000564910.5': '+'}	ENST00000564910.5	Intron	protein_coding	74	chr15	65877367	65877811	+	['ENST00000565075.5', 'ENST00000564910.5']	[]	ENST00000564910.5	Intron	protein_coding	74	chr15	65877367	65877811	+	[]	[]	ENST00000564910.5	Intron	protein_coding	74	chr15	65877367	65877811	+	ENST00000564910.5	Intron	protein_coding	74	chr15	65877367	65877811	+
Merged-chr15-83138230-1	chr15	83138193	83138267	-	0	{'ENST00000299633.7': '3UTR'}	{'ENST00000299633.7': 'protein_coding'}	{'ENST00000299633.7': 74}	{'ENST00000299633.7': 'chr15'}	{'ENST00000299633.7': 83127753.0}	{'ENST00000299633.7': 83139272.0}	{'ENST00000299633.7': '-'}	ENST00000299633.7	3UTR	protein_coding	74	chr15	83127753	83139272	-	['ENST00000299633.7']	['ENST00000299633.7']	ENST00000299633.7	3UTR	protein_coding	74	chr15	83127753	83139272	-	[]	['ENST00000299633.7']	ENST00000299633.7	3UTR	protein_coding	74	chr15	83127753	83139272	-	ENST00000299633.7	3UTR	protein_coding	74	chr15	83127753	83139272	-
Merged-chr15-88913350-1	chr15	88913313	88913387	-	0	{'ENST00000268150.13': '5UTR', 'ENST00000558029.6': '5UTR', 'ENST00000268151.11': '5UTR', 'ENST00000695568.1': '5UTR', 'ENST00000695569.1': '5UTR'}	{'ENST00000268150.13': 'protein_coding', 'ENST00000558029.6': 'protein_coding', 'ENST00000268151.11': 'protein_coding', 'ENST00000695568.1': 'protein_coding', 'ENST00000695569.1': 'protein_coding'}	{'ENST00000268150.13': 60, 'ENST00000558029.6': 68, 'ENST00000268151.11': 62, 'ENST00000695568.1': 68, 'ENST00000695569.1': 68}	{'ENST00000268150.13': 'chr15', 'ENST00000558029.6': 'chr15', 'ENST00000268151.11': 'chr15', 'ENST00000695568.1': 'chr15', 'ENST00000695569.1': 'chr15'}	{'ENST00000268150.13': 88913320.0, 'ENST00000558029.6': 88913320.0, 'ENST00000268151.11': 88913320.0, 'ENST00000695568.1': 88913320.0, 'ENST00000695569.1': 88913320.0}	{'ENST00000268150.13': 88913379.0, 'ENST00000558029.6': 88913411.0, 'ENST00000268151.11': 88913381.0, 'ENST00000695568.1': 88913394.0, 'ENST00000695569.1': 88913410.0}	{'ENST00000268150.13': '-', 'ENST00000558029.6': '-', 'ENST00000268151.11': '-', 'ENST00000695568.1': '-', 'ENST00000695569.1': '-'}	ENST00000558029.6	5UTR	protein_coding	68	chr15	88913320	88913411	-	['ENST00000268150.13', 'ENST00000558029.6', 'ENST00000268151.11', 'ENST00000695568.1', 'ENST00000695569.1']	['ENST00000268150.13']	ENST00000268150.13	5UTR	protein_coding	60	chr15	88913320	88913379	-	['ENST00000268150.13', 'ENST00000558029.6', 'ENST00000268151.11', 'ENST00000695568.1', 'ENST00000695569.1']	[]	ENST00000268150.13	5UTR	protein_coding	60	chr15	88913320	88913379	-	ENST00000558029.6	5UTR	protein_coding	68	chr15	88913320	88913411	-
Merged-chr15-92468716-1	chr15	92468679	92468753	+	0	{'ENST00000268164.8': '3UTR'}	{'ENST00000268164.8': 'protein_coding'}	{'ENST00000268164.8': 49}	{'ENST00000268164.8': 'chr15'}	{'ENST00000268164.8': 92464383.0}	{'ENST00000268164.8': 92468728.0}	{'ENST00000268164.8': '+'}	ENST00000268164.8	3UTR	protein_coding	49	chr15	92464383	92468728	+	['ENST00000268164.8']	['ENST00000268164.8']	ENST00000268164.8	3UTR	protein_coding	49	chr15	92464383	92468728	+	[]	['ENST00000268164.8']	ENST00000268164.8	3UTR	protein_coding	49	chr15	92464383	92468728	+	ENST00000268164.8	3UTR	protein_coding	49	chr15	92464383	92468728	+
Merged-chr5-109334722-1	chr5	109334685	109334759	-	0	{'ENST00000361557.4': '3UTR', 'ENST00000361189.7': '3UTR'}	{'ENST00000361557.4': 'protein_coding', 'ENST00000361189.7': 'protein_coding'}	{'ENST00000361557.4': 47, 'ENST00000361189.7': 38}	{'ENST00000361557.4': 'chr5', 'ENST00000361189.7': 'chr5'}	{'ENST00000361557.4': 109334713.0, 'ENST00000361189.7': 109334722.0}	{'ENST00000361557.4': 109337233.0, 'ENST00000361189.7': 109337233.0}	{'ENST00000361557.4': '-', 'ENST00000361189.7': '-'}	ENST00000361557.4	3UTR	protein_coding	47	chr5	109334713	109337233	-	['ENST00000361557.4', 'ENST00000361189.7']	['ENST00000361189.7']	ENST00000361189.7	3UTR	protein_coding	38	chr5	109334722	109337233	-	[]	['ENST00000361557.4', 'ENST00000361189.7']	ENST00000361557.4	3UTR	protein_coding	47	chr5	109334713	109337233	-	ENST00000361189.7	3UTR	protein_coding	38	chr5	109334722	109337233	-
Merged-chr5-137751589-1	chr5	137751552	137751626	-	0	{'ENST00000314940.7': '3UTR'}	{'ENST00000314940.7': 'protein_coding'}	{'ENST00000314940.7': 74}	{'ENST00000314940.7': 'chr5'}	{'ENST00000314940.7': 137745651.0}	{'ENST00000314940.7': 137753151.0}	{'ENST00000314940.7': '-'}	ENST00000314940.7	3UTR	protein_coding	74	chr5	137745651	137753151	-	['ENST00000314940.7']	['ENST00000314940.7']	ENST00000314940.7	3UTR	protein_coding	74	chr5	137745651	137753151	-	[]	['ENST00000314940.7']	ENST00000314940.7	3UTR	protein_coding	74	chr5	137745651	137753151	-	ENST00000314940.7	3UTR	protein_coding	74	chr5	137745651	137753151	-
Merged-chr5-115613503-1	chr5	115613466	115613540	-	0	{'ENST00000456936.4': '3UTR', 'ENST00000282382.8': 'Intron', 'ENST00000333314.3': 'Intron', 'ENST00000508517.2': 'Intron'}	{'ENST00000456936.4': 'protein_coding', 'ENST00000282382.8': 'protein_coding', 'ENST00000333314.3': 'protein_coding', 'ENST00000508517.2': 'lncRNA'}	{'ENST00000456936.4': 74, 'ENST00000282382.8': 74, 'ENST00000333314.3': 74, 'ENST00000508517.2': 74}	{'ENST00000456936.4': 'chr5', 'ENST00000282382.8': 'chr5', 'ENST00000333314.3': 'chr5', 'ENST00000508517.2': 'chr5'}	{'ENST00000456936.4': 115613210.0, 'ENST00000282382.8': 115581197.0, 'ENST00000333314.3': 115581315.0, 'ENST00000508517.2': 115603156.0}	{'ENST00000456936.4': 115616211.0, 'ENST00000282382.8': 115616317.0, 'ENST00000333314.3': 115616317.0, 'ENST00000508517.2': 115620067.0}	{'ENST00000456936.4': '-', 'ENST00000282382.8': '-', 'ENST00000333314.3': '-', 'ENST00000508517.2': '+'}	ENST00000456936.4	3UTR	protein_coding	74	chr5	115613210	115616211	-	['ENST00000456936.4', 'ENST00000282382.8', 'ENST00000333314.3', 'ENST00000508517.2']	['ENST00000456936.4']	ENST00000456936.4	3UTR	protein_coding	74	chr5	115613210	115616211	-	[]	['ENST00000456936.4']	ENST00000456936.4	3UTR	protein_coding	74	chr5	115613210	115616211	-	ENST00000456936.4	3UTR	protein_coding	74	chr5	115613210	115616211	-
Merged-chr5-95796353-1	chr5	95796316	95796390	+	0	{'ENST00000379982.8': '3UTR', 'ENST00000508780.5': 'Intron'}	{'ENST00000379982.8': 'protein_coding', 'ENST00000508780.5': 'protein_coding'}	{'ENST00000379982.8': 45, 'ENST00000508780.5': 74}	{'ENST00000379982.8': 'chr5', 'ENST00000508780.5': 'chr5'}	{'ENST00000379982.8': 95793172.0, 'ENST00000508780.5': 95751460.0}	{'ENST00000379982.8': 95796361.0, 'ENST00000508780.5': 95816506.0}	{'ENST00000379982.8': '+', 'ENST00000508780.5': '-'}	ENST00000508780.5	Intron	protein_coding	74	chr5	95751460	95816506	-	['ENST00000379982.8', 'ENST00000508780.5']	['ENST00000379982.8']	ENST00000379982.8	3UTR	protein_coding	45	chr5	95793172	95796361	+	[]	['ENST00000379982.8']	ENST00000379982.8	3UTR	protein_coding	45	chr5	95793172	95796361	+	ENST00000379982.8	3UTR	protein_coding	45	chr5	95793172	95796361	+
Merged-chr5-91368749-1	chr5	91368712	91368786	-	0	{'ENST00000265138.4': '3UTR'}	{'ENST00000265138.4': 'protein_coding'}	{'ENST00000265138.4': 74}	{'ENST00000265138.4': 'chr5'}	{'ENST00000265138.4': 91368631.0}	{'ENST00000265138.4': 91371402.0}	{'ENST00000265138.4': '-'}	ENST00000265138.4	3UTR	protein_coding	74	chr5	91368631	91371402	-	['ENST00000265138.4']	['ENST00000265138.4']	ENST00000265138.4	3UTR	protein_coding	74	chr5	91368631	91371402	-	[]	['ENST00000265138.4']	ENST00000265138.4	3UTR	protein_coding	74	chr5	91368631	91371402	-	ENST00000265138.4	3UTR	protein_coding	74	chr5	91368631	91371402	-
Merged-chr5-154817576-1	chr5	154817539	154817613	+	0	{'ENST00000336314.9': '3UTR'}	{'ENST00000336314.9': 'protein_coding'}	{'ENST00000336314.9': 66}	{'ENST00000336314.9': 'chr5'}	{'ENST00000336314.9': 154814094.0}	{'ENST00000336314.9': 154817605.0}	{'ENST00000336314.9': '+'}	ENST00000336314.9	3UTR	protein_coding	66	chr5	154814094	154817605	+	['ENST00000336314.9']	[]	ENST00000336314.9	3UTR	protein_coding	66	chr5	154814094	154817605	+	[]	['ENST00000336314.9']	ENST00000336314.9	3UTR	protein_coding	66	chr5	154814094	154817605	+	ENST00000336314.9	3UTR	protein_coding	66	chr5	154814094	154817605	+
Merged-chr5-178211161-1	chr5	178211124	178211198	+	0	{'ENST00000506339.5': '3UTR', 'ENST00000358344.8': '3UTR', 'ENST00000355836.9': '3UTR', 'ENST00000506259.5': '3UTR', 'ENST00000308158.10': 'Intron'}	{'ENST00000506339.5': 'protein_coding', 'ENST00000358344.8': 'protein_coding', 'ENST00000355836.9': 'protein_coding', 'ENST00000506259.5': 'protein_coding', 'ENST00000308158.10': 'protein_coding'}	{'ENST00000506339.5': 31, 'ENST00000358344.8': 39, 'ENST00000355836.9': 18, 'ENST00000506259.5': 25, 'ENST00000308158.10': 74}	{'ENST00000506339.5': 'chr5', 'ENST00000358344.8': 'chr5', 'ENST00000355836.9': 'chr5', 'ENST00000506259.5': 'chr5', 'ENST00000308158.10': 'chr5'}	{'ENST00000506339.5': 178210621.0, 'ENST00000358344.8': 178210621.0, 'ENST00000355836.9': 178210621.0, 'ENST00000506259.5': 178210621.0, 'ENST00000308158.10': 178208915.0}	{'ENST00000506339.5': 178211155.0, 'ENST00000358344.8': 178211163.0, 'ENST00000355836.9': 178211142.0, 'ENST00000506259.5': 178211149.0, 'ENST00000308158.10': 178211889.0}	{'ENST00000506339.5': '+', 'ENST00000358344.8': '+', 'ENST00000355836.9': '+', 'ENST00000506259.5': '+', 'ENST00000308158.10': '-'}	ENST00000308158.10	Intron	protein_coding	74	chr5	178208915	178211889	-	['ENST00000506339.5', 'ENST00000358344.8', 'ENST00000355836.9', 'ENST00000506259.5', 'ENST00000308158.10']	['ENST00000358344.8', 'ENST00000308158.10']	ENST00000308158.10	Intron	protein_coding	74	chr5	178208915	178211889	-	[]	['ENST00000506339.5', 'ENST00000358344.8', 'ENST00000355836.9', 'ENST00000506259.5']	ENST00000358344.8	3UTR	protein_coding	39	chr5	178210621	178211163	+	ENST00000308158.10	Intron	protein_coding	74	chr5	178208915	178211889	-
Merged-chr5-177483402-1	chr5	177483365	177483439	-	0	{'ENST00000359895.6': '3UTR'}	{'ENST00000359895.6': 'protein_coding'}	{'ENST00000359895.6': 46}	{'ENST00000359895.6': 'chr5'}	{'ENST00000359895.6': 177483394.0}	{'ENST00000359895.6': 177483646.0}	{'ENST00000359895.6': '-'}	ENST00000359895.6	3UTR	protein_coding	46	chr5	177483394	177483646	-	['ENST00000359895.6']	[]	ENST00000359895.6	3UTR	protein_coding	46	chr5	177483394	177483646	-	[]	['ENST00000359895.6']	ENST00000359895.6	3UTR	protein_coding	46	chr5	177483394	177483646	-	ENST00000359895.6	3UTR	protein_coding	46	chr5	177483394	177483646	-
Merged-chr5-140645489-1	chr5	140645452	140645526	-	0	{'ENST00000252102.9': '3UTR', 'ENST00000512088.1': '3UTR'}	{'ENST00000252102.9': 'protein_coding', 'ENST00000512088.1': 'protein_coding'}	{'ENST00000252102.9': 74, 'ENST00000512088.1': 74}	{'ENST00000252102.9': 'chr5', 'ENST00000512088.1': 'chr5'}	{'ENST00000252102.9': 140645285.0, 'ENST00000512088.1': 140645369.0}	{'ENST00000252102.9': 140645589.0, 'ENST00000512088.1': 140645705.0}	{'ENST00000252102.9': '-', 'ENST00000512088.1': '-'}	ENST00000512088.1	3UTR	protein_coding	74	chr5	140645369	140645705	-	['ENST00000252102.9', 'ENST00000512088.1']	['ENST00000252102.9']	ENST00000252102.9	3UTR	protein_coding	74	chr5	140645285	140645589	-	[]	['ENST00000252102.9', 'ENST00000512088.1']	ENST00000252102.9	3UTR	protein_coding	74	chr5	140645285	140645589	-	ENST00000252102.9	3UTR	protein_coding	74	chr5	140645285	140645589	-
Merged-chr5-72196110-1	chr5	72196073	72196147	+	0	{'ENST00000296755.12': 'exon'}	{'ENST00000296755.12': 'protein_coding'}	{'ENST00000296755.12': 74}	{'ENST00000296755.12': 'chr5'}	{'ENST00000296755.12': 72193866.0}	{'ENST00000296755.12': 72200367.0}	{'ENST00000296755.12': '+'}	ENST00000296755.12	exon	protein_coding	74	chr5	72193866	72200367	+	['ENST00000296755.12']	['ENST00000296755.12']	ENST00000296755.12	exon	protein_coding	74	chr5	72193866	72200367	+	[]	[]	ENST00000296755.12	exon	protein_coding	74	chr5	72193866	72200367	+	ENST00000296755.12	exon	protein_coding	74	chr5	72193866	72200367	+
Merged-chr5-75361713-1	chr5	75361676	75361750	+	0	{'ENST00000680160.1': '3UTR', 'ENST00000287936.9': '3UTR', 'ENST00000680940.1': '3UTR', 'ENST00000644912.1': 'Intron'}	{'ENST00000680160.1': 'protein_coding', 'ENST00000287936.9': 'protein_coding', 'ENST00000680940.1': 'protein_coding', 'ENST00000644912.1': 'protein_coding'}	{'ENST00000680160.1': 74, 'ENST00000287936.9': 74, 'ENST00000680940.1': 74, 'ENST00000644912.1': 74}	{'ENST00000680160.1': 'chr5', 'ENST00000287936.9': 'chr5', 'ENST00000680940.1': 'chr5', 'ENST00000644912.1': 'chr5'}	{'ENST00000680160.1': 75360340.0, 'ENST00000287936.9': 75360340.0, 'ENST00000680940.1': 75360340.0, 'ENST00000644912.1': 75357012.0}	{'ENST00000680160.1': 75362089.0, 'ENST00000287936.9': 75362101.0, 'ENST00000680940.1': 75364001.0, 'ENST00000644912.1': 75381071.0}	{'ENST00000680160.1': '+', 'ENST00000287936.9': '+', 'ENST00000680940.1': '+', 'ENST00000644912.1': '-'}	ENST00000680160.1	3UTR	protein_coding	74	chr5	75360340	75362089	+	['ENST00000680160.1', 'ENST00000287936.9', 'ENST00000680940.1', 'ENST00000644912.1']	['ENST00000287936.9']	ENST00000287936.9	3UTR	protein_coding	74	chr5	75360340	75362101	+	[]	['ENST00000680160.1', 'ENST00000287936.9', 'ENST00000680940.1']	ENST00000680160.1	3UTR	protein_coding	74	chr5	75360340	75362089	+	ENST00000287936.9	3UTR	protein_coding	74	chr5	75360340	75362101	+
Merged-chr5-179797613-1	chr5	179797576	179797650	-	0	{'ENST00000337755.9': '3UTR', 'ENST00000292591.12': '3UTR'}	{'ENST00000337755.9': 'protein_coding', 'ENST00000292591.12': 'protein_coding'}	{'ENST00000337755.9': 54, 'ENST00000292591.12': 41}	{'ENST00000337755.9': 'chr5', 'ENST00000292591.12': 'chr5'}	{'ENST00000337755.9': 179797597.0, 'ENST00000292591.12': 179797610.0}	{'ENST00000337755.9': 179798047.0, 'ENST00000292591.12': 179798047.0}	{'ENST00000337755.9': '-', 'ENST00000292591.12': '-'}	ENST00000337755.9	3UTR	protein_coding	54	chr5	179797597	179798047	-	['ENST00000337755.9', 'ENST00000292591.12']	['ENST00000292591.12']	ENST00000292591.12	3UTR	protein_coding	41	chr5	179797610	179798047	-	[]	['ENST00000337755.9', 'ENST00000292591.12']	ENST00000337755.9	3UTR	protein_coding	54	chr5	179797597	179798047	-	ENST00000292591.12	3UTR	protein_coding	41	chr5	179797610	179798047	-
Merged-chr5-43289986-1	chr5	43289949	43290023	-	0	{'ENST00000325110.11': '3UTR', 'ENST00000433297.2': '3UTR', 'ENST00000569313.1': 'Intron'}	{'ENST00000325110.11': 'protein_coding', 'ENST00000433297.2': 'protein_coding', 'ENST00000569313.1': 'lncRNA'}	{'ENST00000325110.11': 74, 'ENST00000433297.2': 74, 'ENST00000569313.1': 74}	{'ENST00000325110.11': 'chr5', 'ENST00000433297.2': 'chr5', 'ENST00000569313.1': 'chr5'}	{'ENST00000325110.11': 43287470.0, 'ENST00000433297.2': 43289395.0, 'ENST00000569313.1': 43289665.0}	{'ENST00000325110.11': 43291133.0, 'ENST00000433297.2': 43291133.0, 'ENST00000569313.1': 43290467.0}	{'ENST00000325110.11': '-', 'ENST00000433297.2': '-', 'ENST00000569313.1': '+'}	ENST00000569313.1	Intron	lncRNA	74	chr5	43289665	43290467	+	['ENST00000325110.11', 'ENST00000433297.2', 'ENST00000569313.1']	['ENST00000325110.11']	ENST00000325110.11	3UTR	protein_coding	74	chr5	43287470	43291133	-	[]	['ENST00000325110.11', 'ENST00000433297.2']	ENST00000325110.11	3UTR	protein_coding	74	chr5	43287470	43291133	-	ENST00000325110.11	3UTR	protein_coding	74	chr5	43287470	43291133	-
Merged-chr17-7243609-1	chr17	7243572	7243646	-	0	{'ENST00000624722.1': 'exon', 'ENST00000574322.6': '3UTR', 'ENST00000573600.5': '3UTR', 'ENST00000570760.2': 'Intron'}	{'ENST00000624722.1': 'TEC', 'ENST00000574322.6': 'protein_coding', 'ENST00000573600.5': 'protein_coding', 'ENST00000570760.2': 'protein_coding'}	{'ENST00000624722.1': 74, 'ENST00000574322.6': 56, 'ENST00000573600.5': 29, 'ENST00000570760.2': 74}	{'ENST00000624722.1': 'chr17', 'ENST00000574322.6': 'chr17', 'ENST00000573600.5': 'chr17', 'ENST00000570760.2': 'chr17'}	{'ENST00000624722.1': 7242200.0, 'ENST00000574322.6': 7243591.0, 'ENST00000573600.5': 7243618.0, 'ENST00000570760.2': 7241679.0}	{'ENST00000624722.1': 7243814.0, 'ENST00000574322.6': 7244187.0, 'ENST00000573600.5': 7244187.0, 'ENST00000570760.2': 7244550.0}	{'ENST00000624722.1': '+', 'ENST00000574322.6': '-', 'ENST00000573600.5': '-', 'ENST00000570760.2': '-'}	ENST00000624722.1	exon	TEC	74	chr17	7242200	7243814	+	['ENST00000624722.1', 'ENST00000574322.6', 'ENST00000573600.5', 'ENST00000570760.2']	['ENST00000574322.6']	ENST00000574322.6	3UTR	protein_coding	56	chr17	7243591	7244187	-	[]	['ENST00000574322.6', 'ENST00000573600.5']	ENST00000574322.6	3UTR	protein_coding	56	chr17	7243591	7244187	-	ENST00000574322.6	3UTR	protein_coding	56	chr17	7243591	7244187	-
Merged-chr5-74627422-1	chr5	74627385	74627459	-	0	{'ENST00000618628.4': 'exon', 'ENST00000302351.9': 'exon', 'ENST00000651128.1': 'exon'}	{'ENST00000618628.4': 'protein_coding', 'ENST00000302351.9': 'protein_coding', 'ENST00000651128.1': 'protein_coding'}	{'ENST00000618628.4': 54, 'ENST00000302351.9': 51, 'ENST00000651128.1': 29}	{'ENST00000618628.4': 'chr5', 'ENST00000302351.9': 'chr5', 'ENST00000651128.1': 'chr5'}	{'ENST00000618628.4': 74627406.0, 'ENST00000302351.9': 74627409.0, 'ENST00000651128.1': 74627431.0}	{'ENST00000618628.4': 74629992.0, 'ENST00000302351.9': 74629992.0, 'ENST00000651128.1': 74629992.0}	{'ENST00000618628.4': '-', 'ENST00000302351.9': '-', 'ENST00000651128.1': '-'}	ENST00000618628.4	exon	protein_coding	54	chr5	74627406	74629992	-	['ENST00000618628.4', 'ENST00000302351.9', 'ENST00000651128.1']	['ENST00000302351.9']	ENST00000302351.9	exon	protein_coding	51	chr5	74627409	74629992	-	[]	[]	ENST00000302351.9	exon	protein_coding	51	chr5	74627409	74629992	-	ENST00000302351.9	exon	protein_coding	51	chr5	74627409	74629992	-
Merged-chr17-50184111-1	chr17	50184074	50184148	-	0	{'ENST00000225964.10': '3UTR'}	{'ENST00000225964.10': 'protein_coding'}	{'ENST00000225964.10': 48}	{'ENST00000225964.10': 'chr17'}	{'ENST00000225964.10': 50184101.0}	{'ENST00000225964.10': 50185504.0}	{'ENST00000225964.10': '-'}	ENST00000225964.10	3UTR	protein_coding	48	chr17	50184101	50185504	-	['ENST00000225964.10']	['ENST00000225964.10']	ENST00000225964.10	3UTR	protein_coding	48	chr17	50184101	50185504	-	[]	['ENST00000225964.10']	ENST00000225964.10	3UTR	protein_coding	48	chr17	50184101	50185504	-	ENST00000225964.10	3UTR	protein_coding	48	chr17	50184101	50185504	-
Merged-chr5-38479822-1	chr5	38479785	38479859	-	0	{'ENST00000453190.7': '3UTR', 'ENST00000263409.8': '3UTR'}	{'ENST00000453190.7': 'protein_coding', 'ENST00000263409.8': 'protein_coding'}	{'ENST00000453190.7': 74, 'ENST00000263409.8': 74}	{'ENST00000453190.7': 'chr5', 'ENST00000263409.8': 'chr5'}	{'ENST00000453190.7': 38474668.0, 'ENST00000263409.8': 38474963.0}	{'ENST00000453190.7': 38481597.0, 'ENST00000263409.8': 38481597.0}	{'ENST00000453190.7': '-', 'ENST00000263409.8': '-'}	ENST00000263409.8	3UTR	protein_coding	74	chr5	38474963	38481597	-	['ENST00000453190.7', 'ENST00000263409.8']	['ENST00000453190.7']	ENST00000453190.7	3UTR	protein_coding	74	chr5	38474668	38481597	-	[]	['ENST00000453190.7', 'ENST00000263409.8']	ENST00000453190.7	3UTR	protein_coding	74	chr5	38474668	38481597	-	ENST00000453190.7	3UTR	protein_coding	74	chr5	38474668	38481597	-
Merged-chr17-6121285-1	chr17	6121248	6121322	+	0	{'ENST00000574946.5': '3UTR'}	{'ENST00000574946.5': 'protein_coding'}	{'ENST00000574946.5': 74}	{'ENST00000574946.5': 'chr17'}	{'ENST00000574946.5': 6120659.0}	{'ENST00000574946.5': 6124427.0}	{'ENST00000574946.5': '+'}	ENST00000574946.5	3UTR	protein_coding	74	chr17	6120659	6124427	+	['ENST00000574946.5']	[]	ENST00000574946.5	3UTR	protein_coding	74	chr17	6120659	6124427	+	[]	['ENST00000574946.5']	ENST00000574946.5	3UTR	protein_coding	74	chr17	6120659	6124427	+	ENST00000574946.5	3UTR	protein_coding	74	chr17	6120659	6124427	+
Merged-chr17-64498265-1	chr17	64498228	64498302	-	0	{'ENST00000225792.10': '3UTR'}	{'ENST00000225792.10': 'protein_coding'}	{'ENST00000225792.10': 49}	{'ENST00000225792.10': 'chr17'}	{'ENST00000225792.10': 64498254.0}	{'ENST00000225792.10': 64499925.0}	{'ENST00000225792.10': '-'}	ENST00000225792.10	3UTR	protein_coding	49	chr17	64498254	64499925	-	['ENST00000225792.10']	['ENST00000225792.10']	ENST00000225792.10	3UTR	protein_coding	49	chr17	64498254	64499925	-	[]	['ENST00000225792.10']	ENST00000225792.10	3UTR	protein_coding	49	chr17	64498254	64499925	-	ENST00000225792.10	3UTR	protein_coding	49	chr17	64498254	64499925	-
Merged-chr17-8508581-1	chr17	8508544	8508618	-	0	{'ENST00000379980.8': 'Intron'}	{'ENST00000379980.8': 'protein_coding'}	{'ENST00000379980.8': 9}	{'ENST00000379980.8': 'chr17'}	{'ENST00000379980.8': 8506489.0}	{'ENST00000379980.8': 8508553.0}	{'ENST00000379980.8': '-'}	ENST00000379980.8	Intron	protein_coding	9	chr17	8506489	8508553	-	['ENST00000379980.8']	[]	ENST00000379980.8	Intron	protein_coding	9	chr17	8506489	8508553	-	[]	[]	ENST00000379980.8	Intron	protein_coding	9	chr17	8506489	8508553	-	ENST00000379980.8	Intron	protein_coding	9	chr17	8506489	8508553	-
Merged-chr17-67033388-1	chr17	67033351	67033425	+	0	{'ENST00000262138.4': '3UTR'}	{'ENST00000262138.4': 'protein_coding'}	{'ENST00000262138.4': 47}	{'ENST00000262138.4': 'chr17'}	{'ENST00000262138.4': 67031002.0}	{'ENST00000262138.4': 67033398.0}	{'ENST00000262138.4': '+'}	ENST00000262138.4	3UTR	protein_coding	47	chr17	67031002	67033398	+	['ENST00000262138.4']	['ENST00000262138.4']	ENST00000262138.4	3UTR	protein_coding	47	chr17	67031002	67033398	+	[]	['ENST00000262138.4']	ENST00000262138.4	3UTR	protein_coding	47	chr17	67031002	67033398	+	ENST00000262138.4	3UTR	protein_coding	47	chr17	67031002	67033398	+
Merged-chr17-75135998-1	chr17	75135961	75136035	-	0	{'ENST00000476258.5': '3UTR', 'ENST00000482348.5': '3UTR', 'ENST00000356033.8': '3UTR', 'ENST00000470924.5': '3UTR', 'ENST00000481647.5': '3UTR'}	{'ENST00000476258.5': 'protein_coding', 'ENST00000482348.5': 'protein_coding', 'ENST00000356033.8': 'protein_coding', 'ENST00000470924.5': 'protein_coding', 'ENST00000481647.5': 'protein_coding'}	{'ENST00000476258.5': 74, 'ENST00000482348.5': 74, 'ENST00000356033.8': 43, 'ENST00000470924.5': 74, 'ENST00000481647.5': 44}	{'ENST00000476258.5': 'chr17', 'ENST00000482348.5': 'chr17', 'ENST00000356033.8': 'chr17', 'ENST00000470924.5': 'chr17', 'ENST00000481647.5': 'chr17'}	{'ENST00000476258.5': 75135248.0, 'ENST00000482348.5': 75135286.0, 'ENST00000356033.8': 75135307.0, 'ENST00000470924.5': 75135886.0, 'ENST00000481647.5': 75135992.0}	{'ENST00000476258.5': 75136104.0, 'ENST00000482348.5': 75136104.0, 'ENST00000356033.8': 75136004.0, 'ENST00000470924.5': 75136104.0, 'ENST00000481647.5': 75136104.0}	{'ENST00000476258.5': '-', 'ENST00000482348.5': '-', 'ENST00000356033.8': '-', 'ENST00000470924.5': '-', 'ENST00000481647.5': '-'}	ENST00000470924.5	3UTR	protein_coding	74	chr17	75135886	75136104	-	['ENST00000476258.5', 'ENST00000482348.5', 'ENST00000356033.8', 'ENST00000470924.5', 'ENST00000481647.5']	[]	ENST00000470924.5	3UTR	protein_coding	74	chr17	75135886	75136104	-	[]	['ENST00000476258.5', 'ENST00000482348.5', 'ENST00000356033.8', 'ENST00000470924.5', 'ENST00000481647.5']	ENST00000476258.5	3UTR	protein_coding	74	chr17	75135248	75136104	-	ENST00000470924.5	3UTR	protein_coding	74	chr17	75135886	75136104	-
Merged-chr17-75500433-1	chr17	75500396	75500470	+	0	{'ENST00000314256.12': '3UTR', 'ENST00000577247.6': '3UTR', 'ENST00000321617.8': '3UTR'}	{'ENST00000314256.12': 'protein_coding', 'ENST00000577247.6': 'protein_coding', 'ENST00000321617.8': 'protein_coding'}	{'ENST00000314256.12': 56, 'ENST00000577247.6': 25, 'ENST00000321617.8': 74}	{'ENST00000314256.12': 'chr17', 'ENST00000577247.6': 'chr17', 'ENST00000321617.8': 'chr17'}	{'ENST00000314256.12': 75499332.0, 'ENST00000577247.6': 75499332.0, 'ENST00000321617.8': 75500261.0}	{'ENST00000314256.12': 75500452.0, 'ENST00000577247.6': 75500421.0, 'ENST00000321617.8': 75501082.0}	{'ENST00000314256.12': '+', 'ENST00000577247.6': '+', 'ENST00000321617.8': '-'}	ENST00000321617.8	3UTR	protein_coding	74	chr17	75500261	75501082	-	['ENST00000314256.12', 'ENST00000577247.6', 'ENST00000321617.8']	['ENST00000314256.12', 'ENST00000321617.8']	ENST00000321617.8	3UTR	protein_coding	74	chr17	75500261	75501082	-	[]	['ENST00000314256.12', 'ENST00000577247.6', 'ENST00000321617.8']	ENST00000321617.8	3UTR	protein_coding	74	chr17	75500261	75501082	-	ENST00000321617.8	3UTR	protein_coding	74	chr17	75500261	75501082	-
Merged-chr17-57862979-1	chr17	57862942	57863016	-	0	{'ENST00000577830.6': 'exon', 'ENST00000407144.6': 'exon', 'ENST00000360238.6': 'exon'}	{'ENST00000577830.6': 'protein_coding', 'ENST00000407144.6': 'protein_coding', 'ENST00000360238.6': 'protein_coding'}	{'ENST00000577830.6': 74, 'ENST00000407144.6': 74, 'ENST00000360238.6': 41}	{'ENST00000577830.6': 'chr17', 'ENST00000407144.6': 'chr17', 'ENST00000360238.6': 'chr17'}	{'ENST00000577830.6': 57861243.0, 'ENST00000407144.6': 57862696.0, 'ENST00000360238.6': 57862976.0}	{'ENST00000577830.6': 57863285.0, 'ENST00000407144.6': 57863285.0, 'ENST00000360238.6': 57863285.0}	{'ENST00000577830.6': '-', 'ENST00000407144.6': '-', 'ENST00000360238.6': '-'}	ENST00000407144.6	exon	protein_coding	74	chr17	57862696	57863285	-	['ENST00000577830.6', 'ENST00000407144.6', 'ENST00000360238.6']	['ENST00000577830.6']	ENST00000577830.6	exon	protein_coding	74	chr17	57861243	57863285	-	[]	[]	ENST00000577830.6	exon	protein_coding	74	chr17	57861243	57863285	-	ENST00000577830.6	exon	protein_coding	74	chr17	57861243	57863285	-
Merged-chr17-8474219-1	chr17	8474182	8474256	-	0	{'ENST00000379980.8': '3UTR', 'ENST00000269243.8': '3UTR', 'ENST00000686654.1': '3UTR', 'ENST00000360416.8': '3UTR'}	{'ENST00000379980.8': 'protein_coding', 'ENST00000269243.8': 'protein_coding', 'ENST00000686654.1': 'protein_coding', 'ENST00000360416.8': 'protein_coding'}	{'ENST00000379980.8': 50, 'ENST00000269243.8': 45, 'ENST00000686654.1': 42, 'ENST00000360416.8': 33}	{'ENST00000379980.8': 'chr17', 'ENST00000269243.8': 'chr17', 'ENST00000686654.1': 'chr17', 'ENST00000360416.8': 'chr17'}	{'ENST00000379980.8': 8474207.0, 'ENST00000269243.8': 8474212.0, 'ENST00000686654.1': 8474215.0, 'ENST00000360416.8': 8474224.0}	{'ENST00000379980.8': 8475806.0, 'ENST00000269243.8': 8475806.0, 'ENST00000686654.1': 8475806.0, 'ENST00000360416.8': 8475806.0}	{'ENST00000379980.8': '-', 'ENST00000269243.8': '-', 'ENST00000686654.1': '-', 'ENST00000360416.8': '-'}	ENST00000379980.8	3UTR	protein_coding	50	chr17	8474207	8475806	-	['ENST00000379980.8', 'ENST00000269243.8', 'ENST00000686654.1', 'ENST00000360416.8']	['ENST00000360416.8']	ENST00000360416.8	3UTR	protein_coding	33	chr17	8474224	8475806	-	[]	['ENST00000379980.8', 'ENST00000269243.8', 'ENST00000686654.1', 'ENST00000360416.8']	ENST00000379980.8	3UTR	protein_coding	50	chr17	8474207	8475806	-	ENST00000360416.8	3UTR	protein_coding	33	chr17	8474224	8475806	-
Merged-chr17-28553394-1	chr17	28553357	28553431	-	0	{'ENST00000308360.8': '3UTR', 'ENST00000706177.1': '3UTR'}	{'ENST00000308360.8': 'protein_coding', 'ENST00000706177.1': 'protein_coding'}	{'ENST00000308360.8': 45, 'ENST00000706177.1': 31}	{'ENST00000308360.8': 'chr17', 'ENST00000706177.1': 'chr17'}	{'ENST00000308360.8': 28553387.0, 'ENST00000706177.1': 28553401.0}	{'ENST00000308360.8': 28554222.0, 'ENST00000706177.1': 28554222.0}	{'ENST00000308360.8': '-', 'ENST00000706177.1': '-'}	ENST00000308360.8	3UTR	protein_coding	45	chr17	28553387	28554222	-	['ENST00000308360.8', 'ENST00000706177.1']	['ENST00000308360.8']	ENST00000308360.8	3UTR	protein_coding	45	chr17	28553387	28554222	-	[]	['ENST00000308360.8', 'ENST00000706177.1']	ENST00000308360.8	3UTR	protein_coding	45	chr17	28553387	28554222	-	ENST00000308360.8	3UTR	protein_coding	45	chr17	28553387	28554222	-
Merged-chr11-18480311-1	chr11	18480274	18480348	-	0	{'ENST00000251968.4': '3UTR', 'ENST00000536719.5': 'Intron'}	{'ENST00000251968.4': 'protein_coding', 'ENST00000536719.5': 'protein_coding'}	{'ENST00000251968.4': 38, 'ENST00000536719.5': 74}	{'ENST00000251968.4': 'chr11', 'ENST00000536719.5': 'chr11'}	{'ENST00000251968.4': 18480311.0, 'ENST00000536719.5': 18469218.0}	{'ENST00000251968.4': 18480548.0, 'ENST00000536719.5': 18481629.0}	{'ENST00000251968.4': '-', 'ENST00000536719.5': '-'}	ENST00000536719.5	Intron	protein_coding	74	chr11	18469218	18481629	-	['ENST00000251968.4', 'ENST00000536719.5']	['ENST00000251968.4']	ENST00000251968.4	3UTR	protein_coding	38	chr11	18480311	18480548	-	[]	['ENST00000251968.4']	ENST00000251968.4	3UTR	protein_coding	38	chr11	18480311	18480548	-	ENST00000251968.4	3UTR	protein_coding	38	chr11	18480311	18480548	-
Merged-chr11-33669903-1	chr11	33669866	33669940	+	0	{'ENST00000534431.1': 'Intron', 'ENST00000658780.2': '3UTR', 'ENST00000321505.9': '3UTR'}	{'ENST00000534431.1': 'lncRNA', 'ENST00000658780.2': 'protein_coding', 'ENST00000321505.9': 'protein_coding'}	{'ENST00000534431.1': 74, 'ENST00000658780.2': 74, 'ENST00000321505.9': 74}	{'ENST00000534431.1': 'chr11', 'ENST00000658780.2': 'chr11', 'ENST00000321505.9': 'chr11'}	{'ENST00000534431.1': 33669645.0, 'ENST00000658780.2': 33668152.0, 'ENST00000321505.9': 33668152.0}	{'ENST00000534431.1': 33670914.0, 'ENST00000658780.2': 33674102.0, 'ENST00000321505.9': 33674098.0}	{'ENST00000534431.1': '-', 'ENST00000658780.2': '+', 'ENST00000321505.9': '+'}	ENST00000534431.1	Intron	lncRNA	74	chr11	33669645	33670914	-	['ENST00000534431.1', 'ENST00000658780.2', 'ENST00000321505.9']	['ENST00000658780.2']	ENST00000658780.2	3UTR	protein_coding	74	chr11	33668152	33674102	+	[]	['ENST00000658780.2', 'ENST00000321505.9']	ENST00000658780.2	3UTR	protein_coding	74	chr11	33668152	33674102	+	ENST00000658780.2	3UTR	protein_coding	74	chr11	33668152	33674102	+
Merged-chr11-46856891-1	chr11	46856854	46856928	-	0	{'ENST00000378623.6': '3UTR', 'ENST00000531719.5': 'Intron', 'ENST00000502049.3': 'Intron'}	{'ENST00000378623.6': 'protein_coding', 'ENST00000531719.5': 'lncRNA', 'ENST00000502049.3': 'lncRNA'}	{'ENST00000378623.6': 74, 'ENST00000531719.5': 74, 'ENST00000502049.3': 74}	{'ENST00000378623.6': 'chr11', 'ENST00000531719.5': 'chr11', 'ENST00000502049.3': 'chr11'}	{'ENST00000378623.6': 46856717.0, 'ENST00000531719.5': 46852946.0, 'ENST00000502049.3': 46846717.0}	{'ENST00000378623.6': 46858985.0, 'ENST00000531719.5': 46873073.0, 'ENST00000502049.3': 46873073.0}	{'ENST00000378623.6': '-', 'ENST00000531719.5': '+', 'ENST00000502049.3': '+'}	ENST00000378623.6	3UTR	protein_coding	74	chr11	46856717	46858985	-	['ENST00000378623.6', 'ENST00000531719.5', 'ENST00000502049.3']	['ENST00000378623.6']	ENST00000378623.6	3UTR	protein_coding	74	chr11	46856717	46858985	-	[]	['ENST00000378623.6']	ENST00000378623.6	3UTR	protein_coding	74	chr11	46856717	46858985	-	ENST00000378623.6	3UTR	protein_coding	74	chr11	46856717	46858985	-
Merged-chr11-57704725-1	chr11	57704688	57704762	-	0	{'ENST00000337672.9': 'Intron', 'ENST00000431606.5': 'Intron'}	{'ENST00000337672.9': 'protein_coding', 'ENST00000431606.5': 'protein_coding'}	{'ENST00000337672.9': 30, 'ENST00000431606.5': 30}	{'ENST00000337672.9': 'chr11', 'ENST00000431606.5': 'chr11'}	{'ENST00000337672.9': 57704635.0, 'ENST00000431606.5': 57704396.0}	{'ENST00000337672.9': 57704718.0, 'ENST00000431606.5': 57704718.0}	{'ENST00000337672.9': '-', 'ENST00000431606.5': '-'}	ENST00000337672.9	Intron	protein_coding	30	chr11	57704635	57704718	-	['ENST00000337672.9', 'ENST00000431606.5']	[]	ENST00000337672.9	Intron	protein_coding	30	chr11	57704635	57704718	-	[]	[]	ENST00000337672.9	Intron	protein_coding	30	chr11	57704635	57704718	-	ENST00000337672.9	Intron	protein_coding	30	chr11	57704635	57704718	-
Merged-chr11-61797228-1	chr11	61797191	61797265	+	0	{'ENST00000305885.3': '3UTR'}	{'ENST00000305885.3': 'protein_coding'}	{'ENST00000305885.3': 47}	{'ENST00000305885.3': 'chr11'}	{'ENST00000305885.3': 61796502.0}	{'ENST00000305885.3': 61797238.0}	{'ENST00000305885.3': '+'}	ENST00000305885.3	3UTR	protein_coding	47	chr11	61796502	61797238	+	['ENST00000305885.3']	['ENST00000305885.3']	ENST00000305885.3	3UTR	protein_coding	47	chr11	61796502	61797238	+	[]	['ENST00000305885.3']	ENST00000305885.3	3UTR	protein_coding	47	chr11	61796502	61797238	+	ENST00000305885.3	3UTR	protein_coding	47	chr11	61796502	61797238	+
Merged-chr11-64606184-1	chr11	64606147	64606221	-	0	{'ENST00000301894.6': '3UTR', 'ENST00000409571.6': '3UTR'}	{'ENST00000301894.6': 'protein_coding', 'ENST00000409571.6': 'protein_coding'}	{'ENST00000301894.6': 48, 'ENST00000409571.6': 45}	{'ENST00000301894.6': 'chr11', 'ENST00000409571.6': 'chr11'}	{'ENST00000301894.6': 64606174.0, 'ENST00000409571.6': 64606177.0}	{'ENST00000301894.6': 64607198.0, 'ENST00000409571.6': 64607198.0}	{'ENST00000301894.6': '-', 'ENST00000409571.6': '-'}	ENST00000301894.6	3UTR	protein_coding	48	chr11	64606174	64607198	-	['ENST00000301894.6', 'ENST00000409571.6']	[]	ENST00000301894.6	3UTR	protein_coding	48	chr11	64606174	64607198	-	[]	['ENST00000301894.6', 'ENST00000409571.6']	ENST00000301894.6	3UTR	protein_coding	48	chr11	64606174	64607198	-	ENST00000301894.6	3UTR	protein_coding	48	chr11	64606174	64607198	-
Merged-chr11-72014429-1	chr11	72014392	72014466	-	0	{'ENST00000358965.10': 'exon', 'ENST00000502284.1': 'exon', 'ENST00000351960.10': 'Intron'}	{'ENST00000358965.10': 'protein_coding', 'ENST00000502284.1': 'lncRNA', 'ENST00000351960.10': 'protein_coding'}	{'ENST00000358965.10': 74, 'ENST00000502284.1': 74, 'ENST00000351960.10': 74}	{'ENST00000358965.10': 'chr11', 'ENST00000502284.1': 'chr11', 'ENST00000351960.10': 'chr11'}	{'ENST00000358965.10': 72012895.0, 'ENST00000502284.1': 72014291.0, 'ENST00000351960.10': 72010854.0}	{'ENST00000358965.10': 72016260.0, 'ENST00000502284.1': 72016887.0, 'ENST00000351960.10': 72016407.0}	{'ENST00000358965.10': '-', 'ENST00000502284.1': '+', 'ENST00000351960.10': '-'}	ENST00000502284.1	exon	lncRNA	74	chr11	72014291	72016887	+	['ENST00000358965.10', 'ENST00000502284.1', 'ENST00000351960.10']	[]	ENST00000502284.1	exon	lncRNA	74	chr11	72014291	72016887	+	[]	[]	ENST00000502284.1	exon	lncRNA	74	chr11	72014291	72016887	+	ENST00000502284.1	exon	lncRNA	74	chr11	72014291	72016887	+
Merged-chr17-81932394-1	chr17	81932357	81932431	-	0	{'ENST00000337943.9': '3UTR', 'ENST00000403172.8': '3UTR', 'ENST00000629768.2': '3UTR', 'ENST00000329875.13': '3UTR', 'ENST00000583521.1': 'exon'}	{'ENST00000337943.9': 'protein_coding', 'ENST00000403172.8': 'protein_coding', 'ENST00000629768.2': 'protein_coding', 'ENST00000329875.13': 'protein_coding', 'ENST00000583521.1': 'lncRNA'}	{'ENST00000337943.9': 48, 'ENST00000403172.8': 48, 'ENST00000629768.2': 48, 'ENST00000329875.13': 41, 'ENST00000583521.1': 34}	{'ENST00000337943.9': 'chr17', 'ENST00000403172.8': 'chr17', 'ENST00000629768.2': 'chr17', 'ENST00000329875.13': 'chr17', 'ENST00000583521.1': 'chr17'}	{'ENST00000337943.9': 81932384.0, 'ENST00000403172.8': 81932384.0, 'ENST00000629768.2': 81932384.0, 'ENST00000329875.13': 81932391.0, 'ENST00000583521.1': 81932398.0}	{'ENST00000337943.9': 81932882.0, 'ENST00000403172.8': 81933216.0, 'ENST00000629768.2': 81933358.0, 'ENST00000329875.13': 81933216.0, 'ENST00000583521.1': 81932784.0}	{'ENST00000337943.9': '-', 'ENST00000403172.8': '-', 'ENST00000629768.2': '-', 'ENST00000329875.13': '-', 'ENST00000583521.1': '+'}	ENST00000337943.9	3UTR	protein_coding	48	chr17	81932384	81932882	-	['ENST00000337943.9', 'ENST00000403172.8', 'ENST00000629768.2', 'ENST00000329875.13', 'ENST00000583521.1']	['ENST00000329875.13']	ENST00000329875.13	3UTR	protein_coding	41	chr17	81932391	81933216	-	[]	['ENST00000337943.9', 'ENST00000403172.8', 'ENST00000629768.2', 'ENST00000329875.13']	ENST00000337943.9	3UTR	protein_coding	48	chr17	81932384	81932882	-	ENST00000329875.13	3UTR	protein_coding	41	chr17	81932391	81933216	-
Merged-chr17-82078555-1	chr17	82078518	82078592	-	0	{'ENST00000306749.4': '3UTR', 'ENST00000634990.1': '3UTR'}	{'ENST00000306749.4': 'protein_coding', 'ENST00000634990.1': 'protein_coding'}	{'ENST00000306749.4': 74, 'ENST00000634990.1': 74}	{'ENST00000306749.4': 'chr17', 'ENST00000634990.1': 'chr17'}	{'ENST00000306749.4': 82078338.0, 'ENST00000634990.1': 82078340.0}	{'ENST00000306749.4': 82079145.0, 'ENST00000634990.1': 82079145.0}	{'ENST00000306749.4': '-', 'ENST00000634990.1': '-'}	ENST00000634990.1	3UTR	protein_coding	74	chr17	82078340	82079145	-	['ENST00000306749.4', 'ENST00000634990.1']	['ENST00000306749.4']	ENST00000306749.4	3UTR	protein_coding	74	chr17	82078338	82079145	-	[]	['ENST00000306749.4', 'ENST00000634990.1']	ENST00000306749.4	3UTR	protein_coding	74	chr17	82078338	82079145	-	ENST00000306749.4	3UTR	protein_coding	74	chr17	82078338	82079145	-
Merged-chr17-6124428-1	chr17	6124391	6124465	+	0	{'ENST00000574946.5': '3UTR'}	{'ENST00000574946.5': 'protein_coding'}	{'ENST00000574946.5': 36}	{'ENST00000574946.5': 'chr17'}	{'ENST00000574946.5': 6120659.0}	{'ENST00000574946.5': 6124427.0}	{'ENST00000574946.5': '+'}	ENST00000574946.5	3UTR	protein_coding	36	chr17	6120659	6124427	+	['ENST00000574946.5']	[]	ENST00000574946.5	3UTR	protein_coding	36	chr17	6120659	6124427	+	[]	['ENST00000574946.5']	ENST00000574946.5	3UTR	protein_coding	36	chr17	6120659	6124427	+	ENST00000574946.5	3UTR	protein_coding	36	chr17	6120659	6124427	+
Merged-chr17-7225367-1	chr17	7225330	7225404	-	0	{'ENST00000005340.10': '3UTR'}	{'ENST00000005340.10': 'protein_coding'}	{'ENST00000005340.10': 63}	{'ENST00000005340.10': 'chr17'}	{'ENST00000005340.10': 7225342.0}	{'ENST00000005340.10': 7225867.0}	{'ENST00000005340.10': '-'}	ENST00000005340.10	3UTR	protein_coding	63	chr17	7225342	7225867	-	['ENST00000005340.10']	['ENST00000005340.10']	ENST00000005340.10	3UTR	protein_coding	63	chr17	7225342	7225867	-	[]	['ENST00000005340.10']	ENST00000005340.10	3UTR	protein_coding	63	chr17	7225342	7225867	-	ENST00000005340.10	3UTR	protein_coding	63	chr17	7225342	7225867	-
Merged-chr17-7668456-1	chr17	7668419	7668493	-	0	{'ENST00000504290.5': 'exon', 'ENST00000504937.5': '3UTR', 'ENST00000420246.6': 'exon', 'ENST00000445888.6': '3UTR', 'ENST00000413465.6': 'Intron', 'ENST00000359597.8': 'Intron'}	{'ENST00000504290.5': 'protein_coding', 'ENST00000504937.5': 'protein_coding', 'ENST00000420246.6': 'protein_coding', 'ENST00000445888.6': 'protein_coding', 'ENST00000413465.6': 'protein_coding', 'ENST00000359597.8': 'protein_coding'}	{'ENST00000504290.5': 74, 'ENST00000504937.5': 74, 'ENST00000420246.6': 74, 'ENST00000445888.6': 73, 'ENST00000413465.6': 74, 'ENST00000359597.8': 74}	{'ENST00000504290.5': 'chr17', 'ENST00000504937.5': 'chr17', 'ENST00000420246.6': 'chr17', 'ENST00000445888.6': 'chr17', 'ENST00000413465.6': 'chr17', 'ENST00000359597.8': 'chr17'}	{'ENST00000504290.5': 7668402.0, 'ENST00000504937.5': 7668402.0, 'ENST00000420246.6': 7668404.0, 'ENST00000445888.6': 7668421.0, 'ENST00000413465.6': 7662014.0, 'ENST00000359597.8': 7666244.0}	{'ENST00000504290.5': 7669690.0, 'ENST00000504937.5': 7669611.0, 'ENST00000420246.6': 7669690.0, 'ENST00000445888.6': 7669611.0, 'ENST00000413465.6': 7674180.0, 'ENST00000359597.8': 7673534.0}	{'ENST00000504290.5': '-', 'ENST00000504937.5': '-', 'ENST00000420246.6': '-', 'ENST00000445888.6': '-', 'ENST00000413465.6': '-', 'ENST00000359597.8': '-'}	ENST00000420246.6	exon	protein_coding	74	chr17	7668404	7669690	-	['ENST00000504290.5', 'ENST00000504937.5', 'ENST00000420246.6', 'ENST00000445888.6', 'ENST00000413465.6', 'ENST00000359597.8']	[]	ENST00000420246.6	exon	protein_coding	74	chr17	7668404	7669690	-	[]	['ENST00000504937.5', 'ENST00000445888.6']	ENST00000504937.5	3UTR	protein_coding	74	chr17	7668402	7669611	-	ENST00000420246.6	exon	protein_coding	74	chr17	7668404	7669690	-
Merged-chr11-94185582-1	chr11	94185545	94185619	+	0	{'ENSG00000250519.7': 'gene'}	{'ENSG00000250519.7': 'lncRNA'}	{'ENSG00000250519.7': 74}	{'ENSG00000250519.7': 'chr11'}	{'ENSG00000250519.7': 94185439.0}	{'ENSG00000250519.7': 94282203.0}	{'ENSG00000250519.7': '+'}	ENSG00000250519.7	gene	lncRNA	74	chr11	94185439	94282203	+	['ENSG00000250519.7']	[]	ENSG00000250519.7	gene	lncRNA	74	chr11	94185439	94282203	+	[]	[]	ENSG00000250519.7	gene	lncRNA	74	chr11	94185439	94282203	+	ENSG00000250519.7	gene	lncRNA	74	chr11	94185439	94282203	+
Merged-chr11-106007983-1	chr11	106007946	106008020	-	0	{'ENST00000301919.9': '3UTR'}	{'ENST00000301919.9': 'protein_coding'}	{'ENST00000301919.9': 74}	{'ENST00000301919.9': 'chr11'}	{'ENST00000301919.9': 106007899.0}	{'ENST00000301919.9': 106009537.0}	{'ENST00000301919.9': '-'}	ENST00000301919.9	3UTR	protein_coding	74	chr11	106007899	106009537	-	['ENST00000301919.9']	['ENST00000301919.9']	ENST00000301919.9	3UTR	protein_coding	74	chr11	106007899	106009537	-	[]	['ENST00000301919.9']	ENST00000301919.9	3UTR	protein_coding	74	chr11	106007899	106009537	-	ENST00000301919.9	3UTR	protein_coding	74	chr11	106007899	106009537	-
Merged-chr11-4093185-1	chr11	4093148	4093222	+	0	{'ENST00000525403.6': '3UTR', 'ENST00000698910.1': '3UTR', 'ENST00000698911.1': '3UTR', 'ENST00000698913.1': '3UTR', 'ENST00000526596.2': '3UTR', 'ENST00000300737.8': '3UTR', 'ENST00000616714.4': '3UTR', 'ENST00000698916.1': '3UTR'}	{'ENST00000525403.6': 'protein_coding', 'ENST00000698910.1': 'protein_coding', 'ENST00000698911.1': 'protein_coding', 'ENST00000698913.1': 'protein_coding', 'ENST00000526596.2': 'protein_coding', 'ENST00000300737.8': 'protein_coding', 'ENST00000616714.4': 'protein_coding', 'ENST00000698916.1': 'protein_coding'}	{'ENST00000525403.6': 40, 'ENST00000698910.1': 43, 'ENST00000698911.1': 38, 'ENST00000698913.1': 42, 'ENST00000526596.2': 60, 'ENST00000300737.8': 61, 'ENST00000616714.4': 62, 'ENST00000698916.1': 40}	{'ENST00000525403.6': 'chr11', 'ENST00000698910.1': 'chr11', 'ENST00000698911.1': 'chr11', 'ENST00000698913.1': 'chr11', 'ENST00000526596.2': 'chr11', 'ENST00000300737.8': 'chr11', 'ENST00000616714.4': 'chr11', 'ENST00000698916.1': 'chr11'}	{'ENST00000525403.6': 4091324.0, 'ENST00000698910.1': 4091796.0, 'ENST00000698911.1': 4091796.0, 'ENST00000698913.1': 4091796.0, 'ENST00000526596.2': 4091796.0, 'ENST00000300737.8': 4091796.0, 'ENST00000616714.4': 4091796.0, 'ENST00000698916.1': 4091796.0}	{'ENST00000525403.6': 4093188.0, 'ENST00000698910.1': 4093191.0, 'ENST00000698911.1': 4093186.0, 'ENST00000698913.1': 4093190.0, 'ENST00000526596.2': 4093208.0, 'ENST00000300737.8': 4093209.0, 'ENST00000616714.4': 4093210.0, 'ENST00000698916.1': 4093188.0}	{'ENST00000525403.6': '+', 'ENST00000698910.1': '+', 'ENST00000698911.1': '+', 'ENST00000698913.1': '+', 'ENST00000526596.2': '+', 'ENST00000300737.8': '+', 'ENST00000616714.4': '+', 'ENST00000698916.1': '+'}	ENST00000616714.4	3UTR	protein_coding	62	chr11	4091796	4093210	+	['ENST00000525403.6', 'ENST00000698910.1', 'ENST00000698911.1', 'ENST00000698913.1', 'ENST00000526596.2', 'ENST00000300737.8', 'ENST00000616714.4', 'ENST00000698916.1']	['ENST00000526596.2']	ENST00000526596.2	3UTR	protein_coding	60	chr11	4091796	4093208	+	[]	['ENST00000525403.6', 'ENST00000698910.1', 'ENST00000698911.1', 'ENST00000698913.1', 'ENST00000526596.2', 'ENST00000300737.8', 'ENST00000616714.4', 'ENST00000698916.1']	ENST00000616714.4	3UTR	protein_coding	62	chr11	4091796	4093210	+	ENST00000526596.2	3UTR	protein_coding	60	chr11	4091796	4093208	+
Merged-chr11-14504886-1	chr11	14504849	14504923	-	0	{'ENST00000396394.7': '3UTR', 'ENST00000530457.5': '3UTR', 'ENST00000555531.1': 'Intron'}	{'ENST00000396394.7': 'protein_coding', 'ENST00000530457.5': 'protein_coding', 'ENST00000555531.1': 'protein_coding'}	{'ENST00000396394.7': 48, 'ENST00000530457.5': 11, 'ENST00000555531.1': 74}	{'ENST00000396394.7': 'chr11', 'ENST00000530457.5': 'chr11', 'ENST00000555531.1': 'chr11'}	{'ENST00000396394.7': 14504876.0, 'ENST00000530457.5': 14504913.0, 'ENST00000555531.1': 14498985.0}	{'ENST00000396394.7': 14505194.0, 'ENST00000530457.5': 14505194.0, 'ENST00000555531.1': 14505156.0}	{'ENST00000396394.7': '-', 'ENST00000530457.5': '-', 'ENST00000555531.1': '-'}	ENST00000555531.1	Intron	protein_coding	74	chr11	14498985	14505156	-	['ENST00000396394.7', 'ENST00000530457.5', 'ENST00000555531.1']	['ENST00000396394.7']	ENST00000396394.7	3UTR	protein_coding	48	chr11	14504876	14505194	-	[]	['ENST00000396394.7', 'ENST00000530457.5']	ENST00000396394.7	3UTR	protein_coding	48	chr11	14504876	14505194	-	ENST00000396394.7	3UTR	protein_coding	48	chr11	14504876	14505194	-
Merged-chr11-62714790-1	chr11	62714753	62714827	-	0	{'ENST00000301785.7': '3UTR', 'ENST00000403734.2': 'Intron'}	{'ENST00000301785.7': 'protein_coding', 'ENST00000403734.2': 'protein_coding'}	{'ENST00000301785.7': 74, 'ENST00000403734.2': 74}	{'ENST00000301785.7': 'chr11', 'ENST00000403734.2': 'chr11'}	{'ENST00000301785.7': 62712630.0, 'ENST00000403734.2': 62707324.0}	{'ENST00000301785.7': 62715301.0, 'ENST00000403734.2': 62715499.0}	{'ENST00000301785.7': '-', 'ENST00000403734.2': '-'}	ENST00000301785.7	3UTR	protein_coding	74	chr11	62712630	62715301	-	['ENST00000301785.7', 'ENST00000403734.2']	['ENST00000301785.7']	ENST00000301785.7	3UTR	protein_coding	74	chr11	62712630	62715301	-	[]	['ENST00000301785.7']	ENST00000301785.7	3UTR	protein_coding	74	chr11	62712630	62715301	-	ENST00000301785.7	3UTR	protein_coding	74	chr11	62712630	62715301	-
Merged-chr11-63574821-1	chr11	63574784	63574858	-	0	{'ENST00000323646.9': '3UTR', 'ENST00000415826.3': '3UTR'}	{'ENST00000323646.9': 'protein_coding', 'ENST00000415826.3': 'protein_coding'}	{'ENST00000323646.9': 74, 'ENST00000415826.3': 74}	{'ENST00000323646.9': 'chr11', 'ENST00000415826.3': 'chr11'}	{'ENST00000323646.9': 63573195.0, 'ENST00000415826.3': 63574462.0}	{'ENST00000323646.9': 63574947.0, 'ENST00000415826.3': 63574947.0}	{'ENST00000323646.9': '-', 'ENST00000415826.3': '-'}	ENST00000415826.3	3UTR	protein_coding	74	chr11	63574462	63574947	-	['ENST00000323646.9', 'ENST00000415826.3']	['ENST00000415826.3']	ENST00000415826.3	3UTR	protein_coding	74	chr11	63574462	63574947	-	[]	['ENST00000323646.9', 'ENST00000415826.3']	ENST00000323646.9	3UTR	protein_coding	74	chr11	63573195	63574947	-	ENST00000415826.3	3UTR	protein_coding	74	chr11	63574462	63574947	-
Merged-chr11-65127296-1	chr11	65127259	65127333	-	0	{'ENST00000377190.8': '3UTR', 'ENST00000307289.10': '3UTR', 'ENST00000526060.5': '3UTR', 'ENST00000279242.7': '3UTR'}	{'ENST00000377190.8': 'protein_coding', 'ENST00000307289.10': 'protein_coding', 'ENST00000526060.5': 'protein_coding', 'ENST00000279242.7': 'protein_coding'}	{'ENST00000377190.8': 55, 'ENST00000307289.10': 53, 'ENST00000526060.5': 52, 'ENST00000279242.7': 74}	{'ENST00000377190.8': 'chr11', 'ENST00000307289.10': 'chr11', 'ENST00000526060.5': 'chr11', 'ENST00000279242.7': 'chr11'}	{'ENST00000377190.8': 65127279.0, 'ENST00000307289.10': 65127281.0, 'ENST00000526060.5': 65127282.0, 'ENST00000279242.7': 65125870.0}	{'ENST00000377190.8': 65128384.0, 'ENST00000307289.10': 65128384.0, 'ENST00000526060.5': 65128384.0, 'ENST00000279242.7': 65127371.0}	{'ENST00000377190.8': '-', 'ENST00000307289.10': '-', 'ENST00000526060.5': '-', 'ENST00000279242.7': '+'}	ENST00000279242.7	3UTR	protein_coding	74	chr11	65125870	65127371	+	['ENST00000377190.8', 'ENST00000307289.10', 'ENST00000526060.5', 'ENST00000279242.7']	['ENST00000377190.8', 'ENST00000279242.7']	ENST00000279242.7	3UTR	protein_coding	74	chr11	65125870	65127371	+	[]	['ENST00000377190.8', 'ENST00000307289.10', 'ENST00000526060.5', 'ENST00000279242.7']	ENST00000279242.7	3UTR	protein_coding	74	chr11	65125870	65127371	+	ENST00000279242.7	3UTR	protein_coding	74	chr11	65125870	65127371	+
Merged-chr11-65866410-1	chr11	65866373	65866447	+	0	{'ENST00000533035.5': '3UTR', 'ENST00000308110.9': '3UTR', 'ENST00000307998.11': '3UTR', 'ENST00000528176.5': '3UTR'}	{'ENST00000533035.5': 'protein_coding', 'ENST00000308110.9': 'protein_coding', 'ENST00000307998.11': 'protein_coding', 'ENST00000528176.5': 'protein_coding'}	{'ENST00000533035.5': 67, 'ENST00000308110.9': 66, 'ENST00000307998.11': 7, 'ENST00000528176.5': 1}	{'ENST00000533035.5': 'chr11', 'ENST00000308110.9': 'chr11', 'ENST00000307998.11': 'chr11', 'ENST00000528176.5': 'chr11'}	{'ENST00000533035.5': 65866050.0, 'ENST00000308110.9': 65866050.0, 'ENST00000307998.11': 65866441.0, 'ENST00000528176.5': 65866447.0}	{'ENST00000533035.5': 65866440.0, 'ENST00000308110.9': 65866439.0, 'ENST00000307998.11': 65866920.0, 'ENST00000528176.5': 65866574.0}	{'ENST00000533035.5': '+', 'ENST00000308110.9': '+', 'ENST00000307998.11': '-', 'ENST00000528176.5': '-'}	ENST00000533035.5	3UTR	protein_coding	67	chr11	65866050	65866440	+	['ENST00000533035.5', 'ENST00000308110.9', 'ENST00000307998.11', 'ENST00000528176.5']	['ENST00000308110.9', 'ENST00000307998.11']	ENST00000308110.9	3UTR	protein_coding	66	chr11	65866050	65866439	+	[]	['ENST00000533035.5', 'ENST00000308110.9', 'ENST00000307998.11', 'ENST00000528176.5']	ENST00000533035.5	3UTR	protein_coding	67	chr11	65866050	65866440	+	ENST00000308110.9	3UTR	protein_coding	66	chr11	65866050	65866439	+
Merged-chr11-102348677-1	chr11	102348640	102348714	+	0	{'ENST00000227758.7': 'AltUTR', 'ENST00000532672.5': 'exon', 'ENST00000530675.5': 'Intron'}	{'ENST00000227758.7': 'protein_coding', 'ENST00000532672.5': 'protein_coding', 'ENST00000530675.5': 'protein_coding'}	{'ENST00000227758.7': 74, 'ENST00000532672.5': 74, 'ENST00000530675.5': 74}	{'ENST00000227758.7': 'chr11', 'ENST00000532672.5': 'chr11', 'ENST00000530675.5': 'chr11'}	{'ENST00000227758.7': 102348598.0, 'ENST00000532672.5': 102348598.0, 'ENST00000530675.5': 102347376.0}	{'ENST00000227758.7': 102349854.0, 'ENST00000532672.5': 102348764.0, 'ENST00000530675.5': 102350000.0}	{'ENST00000227758.7': '+', 'ENST00000532672.5': '+', 'ENST00000530675.5': '+'}	ENST00000227758.7	AltUTR	protein_coding	74	chr11	102348598	102349854	+	['ENST00000227758.7', 'ENST00000532672.5', 'ENST00000530675.5']	['ENST00000227758.7']	ENST00000227758.7	AltUTR	protein_coding	74	chr11	102348598	102349854	+	[]	[]	ENST00000227758.7	AltUTR	protein_coding	74	chr11	102348598	102349854	+	ENST00000227758.7	AltUTR	protein_coding	74	chr11	102348598	102349854	+
Merged-chr11-126267201-1	chr11	126267164	126267238	-	0	{'ENST00000332118.11': 'Intron'}	{'ENST00000332118.11': 'protein_coding'}	{'ENST00000332118.11': 10}	{'ENST00000332118.11': 'chr11'}	{'ENST00000332118.11': 126266922.0}	{'ENST00000332118.11': 126267174.0}	{'ENST00000332118.11': '-'}	ENST00000332118.11	Intron	protein_coding	10	chr11	126266922	126267174	-	['ENST00000332118.11']	['ENST00000332118.11']	ENST00000332118.11	Intron	protein_coding	10	chr11	126266922	126267174	-	[]	[]	ENST00000332118.11	Intron	protein_coding	10	chr11	126266922	126267174	-	ENST00000332118.11	Intron	protein_coding	10	chr11	126266922	126267174	-
Merged-chr11-790479-1	chr11	790442	790516	-	0	{'ENST00000320230.9': '3UTR'}	{'ENST00000320230.9': 'protein_coding'}	{'ENST00000320230.9': 42}	{'ENST00000320230.9': 'chr11'}	{'ENST00000320230.9': 790475.0}	{'ENST00000320230.9': 791917.0}	{'ENST00000320230.9': '-'}	ENST00000320230.9	3UTR	protein_coding	42	chr11	790475	791917	-	['ENST00000320230.9']	[]	ENST00000320230.9	3UTR	protein_coding	42	chr11	790475	791917	-	[]	['ENST00000320230.9']	ENST00000320230.9	3UTR	protein_coding	42	chr11	790475	791917	-	ENST00000320230.9	3UTR	protein_coding	42	chr11	790475	791917	-
Merged-chr11-1012140-1	chr11	1012103	1012177	+	0	{'ENST00000332231.9': '3UTR', 'ENST00000448903.7': '3UTR'}	{'ENST00000332231.9': 'protein_coding', 'ENST00000448903.7': 'protein_coding'}	{'ENST00000332231.9': 74, 'ENST00000448903.7': 74}	{'ENST00000332231.9': 'chr11', 'ENST00000448903.7': 'chr11'}	{'ENST00000332231.9': 1010623.0, 'ENST00000448903.7': 1010623.0}	{'ENST00000332231.9': 1012245.0, 'ENST00000448903.7': 1012240.0}	{'ENST00000332231.9': '+', 'ENST00000448903.7': '+'}	ENST00000332231.9	3UTR	protein_coding	74	chr11	1010623	1012245	+	['ENST00000332231.9', 'ENST00000448903.7']	['ENST00000448903.7']	ENST00000448903.7	3UTR	protein_coding	74	chr11	1010623	1012240	+	[]	['ENST00000332231.9', 'ENST00000448903.7']	ENST00000332231.9	3UTR	protein_coding	74	chr11	1010623	1012245	+	ENST00000448903.7	3UTR	protein_coding	74	chr11	1010623	1012240	+
Merged-chr11-5687412-1	chr11	5687375	5687449	+	0	{'ENST00000380027.5': 'Intron'}	{'ENST00000380027.5': 'protein_coding'}	{'ENST00000380027.5': 74}	{'ENST00000380027.5': 'chr11'}	{'ENST00000380027.5': 5685394.0}	{'ENST00000380027.5': 5855751.0}	{'ENST00000380027.5': '-'}	ENST00000380027.5	Intron	protein_coding	74	chr11	5685394	5855751	-	['ENST00000380027.5']	[]	ENST00000380027.5	Intron	protein_coding	74	chr11	5685394	5855751	-	[]	[]	ENST00000380027.5	Intron	protein_coding	74	chr11	5685394	5855751	-	ENST00000380027.5	Intron	protein_coding	74	chr11	5685394	5855751	-
Merged-chr11-5709196-1	chr11	5709159	5709233	+	0	{'ENST00000379965.8': 'CDS', 'ENST00000454828.6': 'exon', 'ENST00000380027.5': 'Intron'}	{'ENST00000379965.8': 'protein_coding', 'ENST00000454828.6': 'protein_coding', 'ENST00000380027.5': 'protein_coding'}	{'ENST00000379965.8': 74, 'ENST00000454828.6': 74, 'ENST00000380027.5': 74}	{'ENST00000379965.8': 'chr11', 'ENST00000454828.6': 'chr11', 'ENST00000380027.5': 'chr11'}	{'ENST00000379965.8': 5709053.0, 'ENST00000454828.6': 5709053.0, 'ENST00000380027.5': 5685394.0}	{'ENST00000379965.8': 5709645.0, 'ENST00000454828.6': 5710845.0, 'ENST00000380027.5': 5855751.0}	{'ENST00000379965.8': '+', 'ENST00000454828.6': '+', 'ENST00000380027.5': '-'}	ENST00000379965.8	CDS	protein_coding	74	chr11	5709053	5709645	+	['ENST00000379965.8', 'ENST00000454828.6', 'ENST00000380027.5']	['ENST00000379965.8']	ENST00000379965.8	CDS	protein_coding	74	chr11	5709053	5709645	+	[]	[]	ENST00000379965.8	CDS	protein_coding	74	chr11	5709053	5709645	+	ENST00000379965.8	CDS	protein_coding	74	chr11	5709053	5709645	+
Merged-chr11-6394902-1	chr11	6394865	6394939	+	0	{'ENST00000342245.9': '3UTR'}	{'ENST00000342245.9': 'protein_coding'}	{'ENST00000342245.9': 74}	{'ENST00000342245.9': 'chr11'}	{'ENST00000342245.9': 6394605.0}	{'ENST00000342245.9': 6394996.0}	{'ENST00000342245.9': '+'}	ENST00000342245.9	3UTR	protein_coding	74	chr11	6394605	6394996	+	['ENST00000342245.9']	['ENST00000342245.9']	ENST00000342245.9	3UTR	protein_coding	74	chr11	6394605	6394996	+	[]	['ENST00000342245.9']	ENST00000342245.9	3UTR	protein_coding	74	chr11	6394605	6394996	+	ENST00000342245.9	3UTR	protein_coding	74	chr11	6394605	6394996	+
Merged-chr11-9280659-1	chr11	9280622	9280696	-	0	{'ENST00000528080.6': '3UTR', 'ENST00000611268.4': 'exon'}	{'ENST00000528080.6': 'protein_coding', 'ENST00000611268.4': 'protein_coding'}	{'ENST00000528080.6': 43, 'ENST00000611268.4': 40}	{'ENST00000528080.6': 'chr11', 'ENST00000611268.4': 'chr11'}	{'ENST00000528080.6': 9280654.0, 'ENST00000611268.4': 9280657.0}	{'ENST00000528080.6': 9283426.0, 'ENST00000611268.4': 9281041.0}	{'ENST00000528080.6': '-', 'ENST00000611268.4': '-'}	ENST00000528080.6	3UTR	protein_coding	43	chr11	9280654	9283426	-	['ENST00000528080.6', 'ENST00000611268.4']	['ENST00000528080.6']	ENST00000528080.6	3UTR	protein_coding	43	chr11	9280654	9283426	-	[]	['ENST00000528080.6']	ENST00000528080.6	3UTR	protein_coding	43	chr11	9280654	9283426	-	ENST00000528080.6	3UTR	protein_coding	43	chr11	9280654	9283426	-
Merged-chr11-27494904-1	chr11	27494867	27494941	-	0	{'ENST00000278193.7': '3UTR', 'ENST00000524596.1': '3UTR'}	{'ENST00000278193.7': 'protein_coding', 'ENST00000524596.1': 'protein_coding'}	{'ENST00000278193.7': 74, 'ENST00000524596.1': 44}	{'ENST00000278193.7': 'chr11', 'ENST00000524596.1': 'chr11'}	{'ENST00000278193.7': 27494418.0, 'ENST00000524596.1': 27494898.0}	{'ENST00000278193.7': 27498651.0, 'ENST00000524596.1': 27498651.0}	{'ENST00000278193.7': '-', 'ENST00000524596.1': '-'}	ENST00000278193.7	3UTR	protein_coding	74	chr11	27494418	27498651	-	['ENST00000278193.7', 'ENST00000524596.1']	['ENST00000278193.7']	ENST00000278193.7	3UTR	protein_coding	74	chr11	27494418	27498651	-	[]	['ENST00000278193.7', 'ENST00000524596.1']	ENST00000278193.7	3UTR	protein_coding	74	chr11	27494418	27498651	-	ENST00000278193.7	3UTR	protein_coding	74	chr11	27494418	27498651	-
Merged-chr11-31432832-1	chr11	31432795	31432869	+	0	{'ENST00000465995.6': '3UTR', 'ENST00000526776.5': 'Intron'}	{'ENST00000465995.6': 'protein_coding', 'ENST00000526776.5': 'protein_coding'}	{'ENST00000465995.6': 40, 'ENST00000526776.5': 74}	{'ENST00000465995.6': 'chr11', 'ENST00000526776.5': 'chr11'}	{'ENST00000465995.6': 31430399.0, 'ENST00000526776.5': 31432568.0}	{'ENST00000465995.6': 31432835.0, 'ENST00000526776.5': 31433459.0}	{'ENST00000465995.6': '+', 'ENST00000526776.5': '-'}	ENST00000526776.5	Intron	protein_coding	74	chr11	31432568	31433459	-	['ENST00000465995.6', 'ENST00000526776.5']	['ENST00000465995.6']	ENST00000465995.6	3UTR	protein_coding	40	chr11	31430399	31432835	+	[]	['ENST00000465995.6']	ENST00000465995.6	3UTR	protein_coding	40	chr11	31430399	31432835	+	ENST00000465995.6	3UTR	protein_coding	40	chr11	31430399	31432835	+
Merged-chr11-46344593-1	chr11	46344556	46344630	-	0	{'ENST00000343674.10': 'Intron'}	{'ENST00000343674.10': 'protein_coding'}	{'ENST00000343674.10': 74}	{'ENST00000343674.10': 'chr11'}	{'ENST00000343674.10': 46333487.0}	{'ENST00000343674.10': 46367290.0}	{'ENST00000343674.10': '+'}	ENST00000343674.10	Intron	protein_coding	74	chr11	46333487	46367290	+	['ENST00000343674.10']	[]	ENST00000343674.10	Intron	protein_coding	74	chr11	46333487	46367290	+	[]	[]	ENST00000343674.10	Intron	protein_coding	74	chr11	46333487	46367290	+	ENST00000343674.10	Intron	protein_coding	74	chr11	46333487	46367290	+
Merged-chr11-47416489-1	chr11	47416452	47416526	+	0	{'ENST00000533076.5': 'exon', 'ENST00000362021.9': 'exon', 'ENST00000524928.1': '3UTR'}	{'ENST00000533076.5': 'protein_coding', 'ENST00000362021.9': 'protein_coding', 'ENST00000524928.1': 'protein_coding'}	{'ENST00000533076.5': 43, 'ENST00000362021.9': 44, 'ENST00000524928.1': 42}	{'ENST00000533076.5': 'chr11', 'ENST00000362021.9': 'chr11', 'ENST00000524928.1': 'chr11'}	{'ENST00000533076.5': 47416325.0, 'ENST00000362021.9': 47415288.0, 'ENST00000524928.1': 47413915.0}	{'ENST00000533076.5': 47416495.0, 'ENST00000362021.9': 47416496.0, 'ENST00000524928.1': 47416494.0}	{'ENST00000533076.5': '+', 'ENST00000362021.9': '+', 'ENST00000524928.1': '+'}	ENST00000362021.9	exon	protein_coding	44	chr11	47415288	47416496	+	['ENST00000533076.5', 'ENST00000362021.9', 'ENST00000524928.1']	['ENST00000362021.9']	ENST00000362021.9	exon	protein_coding	44	chr11	47415288	47416496	+	[]	['ENST00000524928.1']	ENST00000524928.1	3UTR	protein_coding	42	chr11	47413915	47416494	+	ENST00000362021.9	exon	protein_coding	44	chr11	47415288	47416496	+
Merged-chr11-47465936-1	chr11	47465899	47465973	-	0	{'ENST00000310513.10': 'exon', 'ENST00000687097.1': '3UTR', 'ENST00000395290.6': 'exon'}	{'ENST00000310513.10': 'protein_coding', 'ENST00000687097.1': 'protein_coding', 'ENST00000395290.6': 'protein_coding'}	{'ENST00000310513.10': 41, 'ENST00000687097.1': 37, 'ENST00000395290.6': 30}	{'ENST00000310513.10': 'chr11', 'ENST00000687097.1': 'chr11', 'ENST00000395290.6': 'chr11'}	{'ENST00000310513.10': 47465933.0, 'ENST00000687097.1': 47465937.0, 'ENST00000395290.6': 47465944.0}	{'ENST00000310513.10': 47468891.0, 'ENST00000687097.1': 47472232.0, 'ENST00000395290.6': 47472102.0}	{'ENST00000310513.10': '-', 'ENST00000687097.1': '-', 'ENST00000395290.6': '-'}	ENST00000310513.10	exon	protein_coding	41	chr11	47465933	47468891	-	['ENST00000310513.10', 'ENST00000687097.1', 'ENST00000395290.6']	['ENST00000687097.1']	ENST00000687097.1	3UTR	protein_coding	37	chr11	47465937	47472232	-	[]	['ENST00000687097.1']	ENST00000687097.1	3UTR	protein_coding	37	chr11	47465937	47472232	-	ENST00000687097.1	3UTR	protein_coding	37	chr11	47465937	47472232	-
Merged-chr11-47571795-1	chr11	47571758	47571832	+	0	{'ENST00000426530.2': '3UTR', 'ENST00000534775.1': 'exon', 'ENST00000326656.12': '3UTR', 'ENST00000326674.10': '3UTR'}	{'ENST00000426530.2': 'protein_coding', 'ENST00000534775.1': 'protein_coding', 'ENST00000326656.12': 'protein_coding', 'ENST00000326674.10': 'protein_coding'}	{'ENST00000426530.2': 74, 'ENST00000534775.1': 74, 'ENST00000326656.12': 74, 'ENST00000326674.10': 74}	{'ENST00000426530.2': 'chr11', 'ENST00000534775.1': 'chr11', 'ENST00000326656.12': 'chr11', 'ENST00000326674.10': 'chr11'}	{'ENST00000426530.2': 47571560.0, 'ENST00000534775.1': 47571471.0, 'ENST00000326656.12': 47571627.0, 'ENST00000326674.10': 47571627.0}	{'ENST00000426530.2': 47571927.0, 'ENST00000534775.1': 47572360.0, 'ENST00000326656.12': 47572119.0, 'ENST00000326674.10': 47573461.0}	{'ENST00000426530.2': '+', 'ENST00000534775.1': '+', 'ENST00000326656.12': '+', 'ENST00000326674.10': '+'}	ENST00000326656.12	3UTR	protein_coding	74	chr11	47571627	47572119	+	['ENST00000426530.2', 'ENST00000534775.1', 'ENST00000326656.12', 'ENST00000326674.10']	['ENST00000326674.10']	ENST00000326674.10	3UTR	protein_coding	74	chr11	47571627	47573461	+	[]	['ENST00000426530.2', 'ENST00000326656.12', 'ENST00000326674.10']	ENST00000426530.2	3UTR	protein_coding	74	chr11	47571560	47571927	+	ENST00000326674.10	3UTR	protein_coding	74	chr11	47571627	47573461	+
Merged-chr11-65426533-1	chr11	65426496	65426570	+	0	{'ENST00000646243.1': 'exon', 'ENST00000645023.1': 'exon', 'ENST00000501122.2': 'exon'}	{'ENST00000646243.1': 'lncRNA', 'ENST00000645023.1': 'lncRNA', 'ENST00000501122.2': 'lncRNA'}	{'ENST00000646243.1': 17, 'ENST00000645023.1': 3, 'ENST00000501122.2': 74}	{'ENST00000646243.1': 'chr11', 'ENST00000645023.1': 'chr11', 'ENST00000501122.2': 'chr11'}	{'ENST00000646243.1': 65423627.0, 'ENST00000645023.1': 65423295.0, 'ENST00000501122.2': 65422798.0}	{'ENST00000646243.1': 65426513.0, 'ENST00000645023.1': 65426499.0, 'ENST00000501122.2': 65445540.0}	{'ENST00000646243.1': '+', 'ENST00000645023.1': '+', 'ENST00000501122.2': '+'}	ENST00000501122.2	exon	lncRNA	74	chr11	65422798	65445540	+	['ENST00000646243.1', 'ENST00000645023.1', 'ENST00000501122.2']	[]	ENST00000501122.2	exon	lncRNA	74	chr11	65422798	65445540	+	[]	[]	ENST00000501122.2	exon	lncRNA	74	chr11	65422798	65445540	+	ENST00000501122.2	exon	lncRNA	74	chr11	65422798	65445540	+
Merged-chr11-65538835-1	chr11	65538798	65538872	-	0	{'ENST00000301873.11': '3UTR', 'ENST00000322147.8': '3UTR'}	{'ENST00000301873.11': 'protein_coding', 'ENST00000322147.8': 'protein_coding'}	{'ENST00000301873.11': 74, 'ENST00000322147.8': 68}	{'ENST00000301873.11': 'chr11', 'ENST00000322147.8': 'chr11'}	{'ENST00000301873.11': 65538559.0, 'ENST00000322147.8': 65538805.0}	{'ENST00000301873.11': 65539082.0, 'ENST00000322147.8': 65539082.0}	{'ENST00000301873.11': '-', 'ENST00000322147.8': '-'}	ENST00000301873.11	3UTR	protein_coding	74	chr11	65538559	65539082	-	['ENST00000301873.11', 'ENST00000322147.8']	['ENST00000301873.11']	ENST00000301873.11	3UTR	protein_coding	74	chr11	65538559	65539082	-	[]	['ENST00000301873.11', 'ENST00000322147.8']	ENST00000301873.11	3UTR	protein_coding	74	chr11	65538559	65539082	-	ENST00000301873.11	3UTR	protein_coding	74	chr11	65538559	65539082	-
Merged-chr11-65891642-1	chr11	65891605	65891679	+	0	{'ENST00000312579.4': '3UTR'}	{'ENST00000312579.4': 'protein_coding'}	{'ENST00000312579.4': 30}	{'ENST00000312579.4': 'chr11'}	{'ENST00000312579.4': 65891390.0}	{'ENST00000312579.4': 65891635.0}	{'ENST00000312579.4': '+'}	ENST00000312579.4	3UTR	protein_coding	30	chr11	65891390	65891635	+	['ENST00000312579.4']	['ENST00000312579.4']	ENST00000312579.4	3UTR	protein_coding	30	chr11	65891390	65891635	+	[]	['ENST00000312579.4']	ENST00000312579.4	3UTR	protein_coding	30	chr11	65891390	65891635	+	ENST00000312579.4	3UTR	protein_coding	30	chr11	65891390	65891635	+
Merged-chr1-44778722-1	chr1	44778685	44778759	+	0	{'ENST00000396651.8': '3UTR'}	{'ENST00000396651.8': 'protein_coding'}	{'ENST00000396651.8': 74}	{'ENST00000396651.8': 'chr1'}	{'ENST00000396651.8': 44778683.0}	{'ENST00000396651.8': 44778779.0}	{'ENST00000396651.8': '+'}	ENST00000396651.8	3UTR	protein_coding	74	chr1	44778683	44778779	+	['ENST00000396651.8']	['ENST00000396651.8']	ENST00000396651.8	3UTR	protein_coding	74	chr1	44778683	44778779	+	[]	['ENST00000396651.8']	ENST00000396651.8	3UTR	protein_coding	74	chr1	44778683	44778779	+	ENST00000396651.8	3UTR	protein_coding	74	chr1	44778683	44778779	+
Merged-chr11-66288949-1	chr11	66288912	66288986	-	0	{'ENST00000359461.10': '5UTR', 'ENST00000471387.6': 'Intron', 'ENST00000376901.9': 'Intron'}	{'ENST00000359461.10': 'protein_coding', 'ENST00000471387.6': 'protein_coding', 'ENST00000376901.9': 'protein_coding'}	{'ENST00000359461.10': 1, 'ENST00000471387.6': 42, 'ENST00000376901.9': 42}	{'ENST00000359461.10': 'chr11', 'ENST00000471387.6': 'chr11', 'ENST00000376901.9': 'chr11'}	{'ENST00000359461.10': 66288986.0, 'ENST00000471387.6': 66287676.0, 'ENST00000376901.9': 66288292.0}	{'ENST00000359461.10': 66289145.0, 'ENST00000471387.6': 66288954.0, 'ENST00000376901.9': 66288954.0}	{'ENST00000359461.10': '-', 'ENST00000471387.6': '-', 'ENST00000376901.9': '-'}	ENST00000376901.9	Intron	protein_coding	42	chr11	66288292	66288954	-	['ENST00000359461.10', 'ENST00000471387.6', 'ENST00000376901.9']	['ENST00000376901.9']	ENST00000376901.9	Intron	protein_coding	42	chr11	66288292	66288954	-	['ENST00000359461.10']	[]	ENST00000376901.9	Intron	protein_coding	42	chr11	66288292	66288954	-	ENST00000359461.10	5UTR	protein_coding	1	chr11	66288986	66289145	-
Merged-chr11-67398554-1	chr11	67398517	67398591	-	0	{'ENST00000312989.11': '3UTR', 'ENST00000679175.1': '3UTR', 'ENST00000358239.8': '3UTR'}	{'ENST00000312989.11': 'protein_coding', 'ENST00000679175.1': 'protein_coding', 'ENST00000358239.8': 'protein_coding'}	{'ENST00000312989.11': 20, 'ENST00000679175.1': 20, 'ENST00000358239.8': 20}	{'ENST00000312989.11': 'chr11', 'ENST00000679175.1': 'chr11', 'ENST00000358239.8': 'chr11'}	{'ENST00000312989.11': 67398183.0, 'ENST00000679175.1': 67398201.0, 'ENST00000358239.8': 67398431.0}	{'ENST00000312989.11': 67398537.0, 'ENST00000679175.1': 67398537.0, 'ENST00000358239.8': 67398537.0}	{'ENST00000312989.11': '-', 'ENST00000679175.1': '-', 'ENST00000358239.8': '-'}	ENST00000358239.8	3UTR	protein_coding	20	chr11	67398431	67398537	-	['ENST00000312989.11', 'ENST00000679175.1', 'ENST00000358239.8']	[]	ENST00000358239.8	3UTR	protein_coding	20	chr11	67398431	67398537	-	[]	['ENST00000312989.11', 'ENST00000679175.1', 'ENST00000358239.8']	ENST00000312989.11	3UTR	protein_coding	20	chr11	67398183	67398537	-	ENST00000358239.8	3UTR	protein_coding	20	chr11	67398431	67398537	-
Merged-chr11-68892899-1	chr11	68892862	68892936	-	0	{'ENST00000567045.5': 'CDS', 'ENST00000450904.6': 'Intron'}	{'ENST00000567045.5': 'protein_coding', 'ENST00000450904.6': 'protein_coding'}	{'ENST00000567045.5': 74, 'ENST00000450904.6': 27}	{'ENST00000567045.5': 'chr11', 'ENST00000450904.6': 'chr11'}	{'ENST00000567045.5': 68892603.0, 'ENST00000450904.6': 68891395.0}	{'ENST00000567045.5': 68892993.0, 'ENST00000450904.6': 68892889.0}	{'ENST00000567045.5': '-', 'ENST00000450904.6': '-'}	ENST00000567045.5	CDS	protein_coding	74	chr11	68892603	68892993	-	['ENST00000567045.5', 'ENST00000450904.6']	[]	ENST00000567045.5	CDS	protein_coding	74	chr11	68892603	68892993	-	[]	[]	ENST00000567045.5	CDS	protein_coding	74	chr11	68892603	68892993	-	ENST00000567045.5	CDS	protein_coding	74	chr11	68892603	68892993	-
Merged-chr11-75605320-1	chr11	75605283	75605357	-	0	{'ENST00000434603.2': '3UTR', 'ENST00000304771.8': 'Intron'}	{'ENST00000434603.2': 'protein_coding', 'ENST00000304771.8': 'protein_coding'}	{'ENST00000434603.2': 74, 'ENST00000304771.8': 74}	{'ENST00000434603.2': 'chr11', 'ENST00000304771.8': 'chr11'}	{'ENST00000434603.2': 75602860.0, 'ENST00000304771.8': 75588184.0}	{'ENST00000434603.2': 75605806.0, 'ENST00000304771.8': 75605807.0}	{'ENST00000434603.2': '-', 'ENST00000304771.8': '-'}	ENST00000434603.2	3UTR	protein_coding	74	chr11	75602860	75605806	-	['ENST00000434603.2', 'ENST00000304771.8']	['ENST00000304771.8']	ENST00000304771.8	Intron	protein_coding	74	chr11	75588184	75605807	-	[]	['ENST00000434603.2']	ENST00000434603.2	3UTR	protein_coding	74	chr11	75602860	75605806	-	ENST00000304771.8	Intron	protein_coding	74	chr11	75588184	75605807	-
Merged-chr1-156009067-1	chr1	156009030	156009104	-	0	{'ENST00000295702.9': '3UTR', 'ENST00000529008.5': '3UTR', 'ENST00000650235.1': 'Intron'}	{'ENST00000295702.9': 'protein_coding', 'ENST00000529008.5': 'protein_coding', 'ENST00000650235.1': 'lncRNA'}	{'ENST00000295702.9': 57, 'ENST00000529008.5': 19, 'ENST00000650235.1': 74}	{'ENST00000295702.9': 'chr1', 'ENST00000529008.5': 'chr1', 'ENST00000650235.1': 'chr1'}	{'ENST00000295702.9': 156009048.0, 'ENST00000529008.5': 156009086.0, 'ENST00000650235.1': 156003013.0}	{'ENST00000295702.9': 156009542.0, 'ENST00000529008.5': 156009625.0, 'ENST00000650235.1': 156018154.0}	{'ENST00000295702.9': '-', 'ENST00000529008.5': '-', 'ENST00000650235.1': '+'}	ENST00000650235.1	Intron	lncRNA	74	chr1	156003013	156018154	+	['ENST00000295702.9', 'ENST00000529008.5', 'ENST00000650235.1']	['ENST00000295702.9']	ENST00000295702.9	3UTR	protein_coding	57	chr1	156009048	156009542	-	[]	['ENST00000295702.9', 'ENST00000529008.5']	ENST00000295702.9	3UTR	protein_coding	57	chr1	156009048	156009542	-	ENST00000295702.9	3UTR	protein_coding	57	chr1	156009048	156009542	-
Merged-chr1-23309793-1	chr1	23309756	23309830	-	0	{'ENST00000302271.11': '3UTR', 'ENST00000374616.7': '3UTR', 'ENST00000374612.5': '3UTR'}	{'ENST00000302271.11': 'protein_coding', 'ENST00000374616.7': 'protein_coding', 'ENST00000374612.5': 'protein_coding'}	{'ENST00000302271.11': 74, 'ENST00000374616.7': 48, 'ENST00000374612.5': 45}	{'ENST00000302271.11': 'chr1', 'ENST00000374616.7': 'chr1', 'ENST00000374612.5': 'chr1'}	{'ENST00000302271.11': 23304688.0, 'ENST00000374616.7': 23309783.0, 'ENST00000374612.5': 23309786.0}	{'ENST00000302271.11': 23310456.0, 'ENST00000374616.7': 23310456.0, 'ENST00000374612.5': 23310456.0}	{'ENST00000302271.11': '-', 'ENST00000374616.7': '-', 'ENST00000374612.5': '-'}	ENST00000302271.11	3UTR	protein_coding	74	chr1	23304688	23310456	-	['ENST00000302271.11', 'ENST00000374616.7', 'ENST00000374612.5']	['ENST00000302271.11']	ENST00000302271.11	3UTR	protein_coding	74	chr1	23304688	23310456	-	[]	['ENST00000302271.11', 'ENST00000374616.7', 'ENST00000374612.5']	ENST00000302271.11	3UTR	protein_coding	74	chr1	23304688	23310456	-	ENST00000302271.11	3UTR	protein_coding	74	chr1	23304688	23310456	-
Merged-chr1-11674491-1	chr1	11674454	11674528	-	0	{'ENST00000376692.9': '3UTR', 'ENST00000376672.5': '3UTR'}	{'ENST00000376692.9': 'protein_coding', 'ENST00000376672.5': 'protein_coding'}	{'ENST00000376692.9': 49, 'ENST00000376672.5': 4}	{'ENST00000376692.9': 'chr1', 'ENST00000376672.5': 'chr1'}	{'ENST00000376692.9': 11674480.0, 'ENST00000376672.5': 11674525.0}	{'ENST00000376692.9': 11674777.0, 'ENST00000376672.5': 11674777.0}	{'ENST00000376692.9': '-', 'ENST00000376672.5': '-'}	ENST00000376692.9	3UTR	protein_coding	49	chr1	11674480	11674777	-	['ENST00000376692.9', 'ENST00000376672.5']	['ENST00000376692.9']	ENST00000376692.9	3UTR	protein_coding	49	chr1	11674480	11674777	-	[]	['ENST00000376692.9', 'ENST00000376672.5']	ENST00000376692.9	3UTR	protein_coding	49	chr1	11674480	11674777	-	ENST00000376692.9	3UTR	protein_coding	49	chr1	11674480	11674777	-
Merged-chr19-2101005-1	chr19	2100968	2101042	-	0	{'ENST00000345016.9': '3UTR', 'ENST00000700387.1': '3UTR'}	{'ENST00000345016.9': 'protein_coding', 'ENST00000700387.1': 'protein_coding'}	{'ENST00000345016.9': 55, 'ENST00000700387.1': 49}	{'ENST00000345016.9': 'chr19', 'ENST00000700387.1': 'chr19'}	{'ENST00000345016.9': 2100988.0, 'ENST00000700387.1': 2100994.0}	{'ENST00000345016.9': 2102175.0, 'ENST00000700387.1': 2102175.0}	{'ENST00000345016.9': '-', 'ENST00000700387.1': '-'}	ENST00000345016.9	3UTR	protein_coding	55	chr19	2100988	2102175	-	['ENST00000345016.9', 'ENST00000700387.1']	[]	ENST00000345016.9	3UTR	protein_coding	55	chr19	2100988	2102175	-	[]	['ENST00000345016.9', 'ENST00000700387.1']	ENST00000345016.9	3UTR	protein_coding	55	chr19	2100988	2102175	-	ENST00000345016.9	3UTR	protein_coding	55	chr19	2100988	2102175	-
Merged-chr19-46609279-1	chr19	46609242	46609316	+	0	{'ENST00000391918.6': '3UTR', 'ENST00000597743.5': '3UTR', 'ENST00000291295.14': '3UTR', 'ENST00000599839.5': '3UTR', 'ENST00000596362.1': '3UTR', 'ENST00000597609.1': 'exon'}	{'ENST00000391918.6': 'protein_coding', 'ENST00000597743.5': 'protein_coding', 'ENST00000291295.14': 'protein_coding', 'ENST00000599839.5': 'protein_coding', 'ENST00000596362.1': 'protein_coding', 'ENST00000597609.1': 'lncRNA'}	{'ENST00000391918.6': 63, 'ENST00000597743.5': 74, 'ENST00000291295.14': 74, 'ENST00000599839.5': 74, 'ENST00000596362.1': 74, 'ENST00000597609.1': 40}	{'ENST00000391918.6': 'chr19', 'ENST00000597743.5': 'chr19', 'ENST00000291295.14': 'chr19', 'ENST00000599839.5': 'chr19', 'ENST00000596362.1': 'chr19', 'ENST00000597609.1': 'chr19'}	{'ENST00000391918.6': 46609151.0, 'ENST00000597743.5': 46609151.0, 'ENST00000291295.14': 46609151.0, 'ENST00000599839.5': 46609151.0, 'ENST00000596362.1': 46609151.0, 'ENST00000597609.1': 46609277.0}	{'ENST00000391918.6': 46609305.0, 'ENST00000597743.5': 46609319.0, 'ENST00000291295.14': 46610782.0, 'ENST00000599839.5': 46609996.0, 'ENST00000596362.1': 46609770.0, 'ENST00000597609.1': 46609378.0}	{'ENST00000391918.6': '+', 'ENST00000597743.5': '+', 'ENST00000291295.14': '+', 'ENST00000599839.5': '+', 'ENST00000596362.1': '+', 'ENST00000597609.1': '-'}	ENST00000597743.5	3UTR	protein_coding	74	chr19	46609151	46609319	+	['ENST00000391918.6', 'ENST00000597743.5', 'ENST00000291295.14', 'ENST00000599839.5', 'ENST00000596362.1', 'ENST00000597609.1']	['ENST00000291295.14']	ENST00000291295.14	3UTR	protein_coding	74	chr19	46609151	46610782	+	[]	['ENST00000391918.6', 'ENST00000597743.5', 'ENST00000291295.14', 'ENST00000599839.5', 'ENST00000596362.1']	ENST00000597743.5	3UTR	protein_coding	74	chr19	46609151	46609319	+	ENST00000291295.14	3UTR	protein_coding	74	chr19	46609151	46610782	+
Merged-chr1-165727560-1	chr1	165727523	165727597	-	0	{'ENST00000612311.4': '3UTR', 'ENST00000367881.11': '3UTR', 'ENST00000580248.5': '3UTR', 'ENST00000464650.5': '3UTR'}	{'ENST00000612311.4': 'protein_coding', 'ENST00000367881.11': 'protein_coding', 'ENST00000580248.5': 'protein_coding', 'ENST00000464650.5': 'protein_coding'}	{'ENST00000612311.4': 74, 'ENST00000367881.11': 74, 'ENST00000580248.5': 74, 'ENST00000464650.5': 60}	{'ENST00000612311.4': 'chr1', 'ENST00000367881.11': 'chr1', 'ENST00000580248.5': 'chr1', 'ENST00000464650.5': 'chr1'}	{'ENST00000612311.4': 165724293.0, 'ENST00000367881.11': 165726795.0, 'ENST00000580248.5': 165727306.0, 'ENST00000464650.5': 165727538.0}	{'ENST00000612311.4': 165728025.0, 'ENST00000367881.11': 165728025.0, 'ENST00000580248.5': 165728025.0, 'ENST00000464650.5': 165728025.0}	{'ENST00000612311.4': '-', 'ENST00000367881.11': '-', 'ENST00000580248.5': '-', 'ENST00000464650.5': '-'}	ENST00000580248.5	3UTR	protein_coding	74	chr1	165727306	165728025	-	['ENST00000612311.4', 'ENST00000367881.11', 'ENST00000580248.5', 'ENST00000464650.5']	['ENST00000367881.11']	ENST00000367881.11	3UTR	protein_coding	74	chr1	165726795	165728025	-	[]	['ENST00000612311.4', 'ENST00000367881.11', 'ENST00000580248.5', 'ENST00000464650.5']	ENST00000612311.4	3UTR	protein_coding	74	chr1	165724293	165728025	-	ENST00000367881.11	3UTR	protein_coding	74	chr1	165726795	165728025	-
Merged-chr19-10395977-1	chr19	10395940	10396014	-	0	{'ENST00000222005.7': 'exon'}	{'ENST00000222005.7': 'protein_coding'}	{'ENST00000222005.7': 74}	{'ENST00000222005.7': 'chr19'}	{'ENST00000222005.7': 10395928.0}	{'ENST00000222005.7': 10396203.0}	{'ENST00000222005.7': '-'}	ENST00000222005.7	exon	protein_coding	74	chr19	10395928	10396203	-	['ENST00000222005.7']	['ENST00000222005.7']	ENST00000222005.7	exon	protein_coding	74	chr19	10395928	10396203	-	[]	[]	ENST00000222005.7	exon	protein_coding	74	chr19	10395928	10396203	-	ENST00000222005.7	exon	protein_coding	74	chr19	10395928	10396203	-
Merged-chr1-39560824-1	chr1	39560787	39560861	-	0	{'ENST00000676859.1': 'exon', 'ENST00000372862.7': 'exon', 'ENST00000678625.1': 'exon'}	{'ENST00000676859.1': 'protein_coding', 'ENST00000372862.7': 'protein_coding', 'ENST00000678625.1': 'protein_coding'}	{'ENST00000676859.1': 48, 'ENST00000372862.7': 46, 'ENST00000678625.1': 5}	{'ENST00000676859.1': 'chr1', 'ENST00000372862.7': 'chr1', 'ENST00000678625.1': 'chr1'}	{'ENST00000676859.1': 39560814.0, 'ENST00000372862.7': 39560816.0, 'ENST00000678625.1': 39560857.0}	{'ENST00000676859.1': 39561122.0, 'ENST00000372862.7': 39561122.0, 'ENST00000678625.1': 39561122.0}	{'ENST00000676859.1': '-', 'ENST00000372862.7': '-', 'ENST00000678625.1': '-'}	ENST00000676859.1	exon	protein_coding	48	chr1	39560814	39561122	-	['ENST00000676859.1', 'ENST00000372862.7', 'ENST00000678625.1']	[]	ENST00000676859.1	exon	protein_coding	48	chr1	39560814	39561122	-	[]	[]	ENST00000676859.1	exon	protein_coding	48	chr1	39560814	39561122	-	ENST00000676859.1	exon	protein_coding	48	chr1	39560814	39561122	-
Merged-chr1-11054602-1	chr1	11054565	11054639	-	0	{'ENST00000376957.7': '3UTR'}	{'ENST00000376957.7': 'protein_coding'}	{'ENST00000376957.7': 51}	{'ENST00000376957.7': 'chr1'}	{'ENST00000376957.7': 11054589.0}	{'ENST00000376957.7': 11054867.0}	{'ENST00000376957.7': '-'}	ENST00000376957.7	3UTR	protein_coding	51	chr1	11054589	11054867	-	['ENST00000376957.7']	['ENST00000376957.7']	ENST00000376957.7	3UTR	protein_coding	51	chr1	11054589	11054867	-	[]	['ENST00000376957.7']	ENST00000376957.7	3UTR	protein_coding	51	chr1	11054589	11054867	-	ENST00000376957.7	3UTR	protein_coding	51	chr1	11054589	11054867	-
Merged-chr1-68125377-1	chr1	68125340	68125414	-	0	{'ENST00000262348.9': '3UTR', 'ENST00000420587.5': 'Intron', 'ENST00000354777.6': 'Intron', 'ENST00000413628.5': 'Intron'}	{'ENST00000262348.9': 'protein_coding', 'ENST00000420587.5': 'lncRNA', 'ENST00000354777.6': 'protein_coding', 'ENST00000413628.5': 'lncRNA'}	{'ENST00000262348.9': 55, 'ENST00000420587.5': 74, 'ENST00000354777.6': 74, 'ENST00000413628.5': 74}	{'ENST00000262348.9': 'chr1', 'ENST00000420587.5': 'chr1', 'ENST00000354777.6': 'chr1', 'ENST00000413628.5': 'chr1'}	{'ENST00000262348.9': 68125360.0, 'ENST00000420587.5': 68121241.0, 'ENST00000354777.6': 68098753.0, 'ENST00000413628.5': 68121241.0}	{'ENST00000262348.9': 68126228.0, 'ENST00000420587.5': 68138296.0, 'ENST00000354777.6': 68137779.0, 'ENST00000413628.5': 68201968.0}	{'ENST00000262348.9': '-', 'ENST00000420587.5': '+', 'ENST00000354777.6': '-', 'ENST00000413628.5': '+'}	ENST00000420587.5	Intron	lncRNA	74	chr1	68121241	68138296	+	['ENST00000262348.9', 'ENST00000420587.5', 'ENST00000354777.6', 'ENST00000413628.5']	['ENST00000262348.9']	ENST00000262348.9	3UTR	protein_coding	55	chr1	68125360	68126228	-	[]	['ENST00000262348.9']	ENST00000262348.9	3UTR	protein_coding	55	chr1	68125360	68126228	-	ENST00000262348.9	3UTR	protein_coding	55	chr1	68125360	68126228	-
Merged-chr1-154206734-1	chr1	154206697	154206771	-	0	{'ENST00000368521.10': '3UTR'}	{'ENST00000368521.10': 'protein_coding'}	{'ENST00000368521.10': 52}	{'ENST00000368521.10': 'chr1'}	{'ENST00000368521.10': 154206720.0}	{'ENST00000368521.10': 154207455.0}	{'ENST00000368521.10': '-'}	ENST00000368521.10	3UTR	protein_coding	52	chr1	154206720	154207455	-	['ENST00000368521.10']	['ENST00000368521.10']	ENST00000368521.10	3UTR	protein_coding	52	chr1	154206720	154207455	-	[]	['ENST00000368521.10']	ENST00000368521.10	3UTR	protein_coding	52	chr1	154206720	154207455	-	ENST00000368521.10	3UTR	protein_coding	52	chr1	154206720	154207455	-
Merged-chr1-183145572-1	chr1	183145535	183145609	+	0	{'ENST00000258341.5': '3UTR'}	{'ENST00000258341.5': 'protein_coding'}	{'ENST00000258341.5': 57}	{'ENST00000258341.5': 'chr1'}	{'ENST00000258341.5': 183142788.0}	{'ENST00000258341.5': 183145592.0}	{'ENST00000258341.5': '+'}	ENST00000258341.5	3UTR	protein_coding	57	chr1	183142788	183145592	+	['ENST00000258341.5']	['ENST00000258341.5']	ENST00000258341.5	3UTR	protein_coding	57	chr1	183142788	183145592	+	[]	['ENST00000258341.5']	ENST00000258341.5	3UTR	protein_coding	57	chr1	183142788	183145592	+	ENST00000258341.5	3UTR	protein_coding	57	chr1	183142788	183145592	+
Merged-chr19-56087388-1	chr19	56087351	56087425	-	0	{'ENST00000610935.2': '3UTR'}	{'ENST00000610935.2': 'protein_coding'}	{'ENST00000610935.2': 60}	{'ENST00000610935.2': 'chr19'}	{'ENST00000610935.2': 56087366.0}	{'ENST00000610935.2': 56088025.0}	{'ENST00000610935.2': '-'}	ENST00000610935.2	3UTR	protein_coding	60	chr19	56087366	56088025	-	['ENST00000610935.2']	['ENST00000610935.2']	ENST00000610935.2	3UTR	protein_coding	60	chr19	56087366	56088025	-	[]	['ENST00000610935.2']	ENST00000610935.2	3UTR	protein_coding	60	chr19	56087366	56088025	-	ENST00000610935.2	3UTR	protein_coding	60	chr19	56087366	56088025	-
Merged-chr19-18369945-1	chr19	18369908	18369982	+	0	{'ENST00000269919.11': '3UTR'}	{'ENST00000269919.11': 'protein_coding'}	{'ENST00000269919.11': 42}	{'ENST00000269919.11': 'chr19'}	{'ENST00000269919.11': 18363581.0}	{'ENST00000269919.11': 18369950.0}	{'ENST00000269919.11': '+'}	ENST00000269919.11	3UTR	protein_coding	42	chr19	18363581	18369950	+	['ENST00000269919.11']	['ENST00000269919.11']	ENST00000269919.11	3UTR	protein_coding	42	chr19	18363581	18369950	+	[]	['ENST00000269919.11']	ENST00000269919.11	3UTR	protein_coding	42	chr19	18363581	18369950	+	ENST00000269919.11	3UTR	protein_coding	42	chr19	18363581	18369950	+
Merged-chr19-55674699-1	chr19	55674662	55674736	+	0	{'ENST00000450554.6': '3UTR', 'ENST00000308924.9': '3UTR', 'ENST00000589456.1': 'exon'}	{'ENST00000450554.6': 'protein_coding', 'ENST00000308924.9': 'protein_coding', 'ENST00000589456.1': 'lncRNA'}	{'ENST00000450554.6': 53, 'ENST00000308924.9': 54, 'ENST00000589456.1': 53}	{'ENST00000450554.6': 'chr19', 'ENST00000308924.9': 'chr19', 'ENST00000589456.1': 'chr19'}	{'ENST00000450554.6': 55674066.0, 'ENST00000308924.9': 55674066.0, 'ENST00000589456.1': 55674649.0}	{'ENST00000450554.6': 55674715.0, 'ENST00000308924.9': 55674716.0, 'ENST00000589456.1': 55674715.0}	{'ENST00000450554.6': '+', 'ENST00000308924.9': '+', 'ENST00000589456.1': '-'}	ENST00000308924.9	3UTR	protein_coding	54	chr19	55674066	55674716	+	['ENST00000450554.6', 'ENST00000308924.9', 'ENST00000589456.1']	['ENST00000308924.9']	ENST00000308924.9	3UTR	protein_coding	54	chr19	55674066	55674716	+	[]	['ENST00000450554.6', 'ENST00000308924.9']	ENST00000308924.9	3UTR	protein_coding	54	chr19	55674066	55674716	+	ENST00000308924.9	3UTR	protein_coding	54	chr19	55674066	55674716	+
Merged-chr19-1301092-1	chr19	1301055	1301129	+	0	{'ENST00000215368.4': '3UTR'}	{'ENST00000215368.4': 'protein_coding'}	{'ENST00000215368.4': 74}	{'ENST00000215368.4': 'chr19'}	{'ENST00000215368.4': 1299943.0}	{'ENST00000215368.4': 1301431.0}	{'ENST00000215368.4': '+'}	ENST00000215368.4	3UTR	protein_coding	74	chr19	1299943	1301431	+	['ENST00000215368.4']	['ENST00000215368.4']	ENST00000215368.4	3UTR	protein_coding	74	chr19	1299943	1301431	+	[]	['ENST00000215368.4']	ENST00000215368.4	3UTR	protein_coding	74	chr19	1299943	1301431	+	ENST00000215368.4	3UTR	protein_coding	74	chr19	1299943	1301431	+
Merged-chr19-14087879-1	chr19	14087842	14087916	-	0	{'ENST00000533683.7': '3UTR'}	{'ENST00000533683.7': 'protein_coding'}	{'ENST00000533683.7': 66}	{'ENST00000533683.7': 'chr19'}	{'ENST00000533683.7': 14087851.0}	{'ENST00000533683.7': 14088419.0}	{'ENST00000533683.7': '-'}	ENST00000533683.7	3UTR	protein_coding	66	chr19	14087851	14088419	-	['ENST00000533683.7']	[]	ENST00000533683.7	3UTR	protein_coding	66	chr19	14087851	14088419	-	[]	['ENST00000533683.7']	ENST00000533683.7	3UTR	protein_coding	66	chr19	14087851	14088419	-	ENST00000533683.7	3UTR	protein_coding	66	chr19	14087851	14088419	-
Merged-chr19-4838350-1	chr19	4838313	4838387	-	0	{'ENST00000591657.1': 'exon', 'ENST00000221957.9': '3UTR', 'ENST00000592528.5': '3UTR'}	{'ENST00000591657.1': 'lncRNA', 'ENST00000221957.9': 'protein_coding', 'ENST00000592528.5': 'protein_coding'}	{'ENST00000591657.1': 56, 'ENST00000221957.9': 47, 'ENST00000592528.5': 19}	{'ENST00000591657.1': 'chr19', 'ENST00000221957.9': 'chr19', 'ENST00000592528.5': 'chr19'}	{'ENST00000591657.1': 4838332.0, 'ENST00000221957.9': 4838341.0, 'ENST00000592528.5': 4838369.0}	{'ENST00000591657.1': 4838410.0, 'ENST00000221957.9': 4839194.0, 'ENST00000592528.5': 4839194.0}	{'ENST00000591657.1': '+', 'ENST00000221957.9': '-', 'ENST00000592528.5': '-'}	ENST00000591657.1	exon	lncRNA	56	chr19	4838332	4838410	+	['ENST00000591657.1', 'ENST00000221957.9', 'ENST00000592528.5']	['ENST00000221957.9']	ENST00000221957.9	3UTR	protein_coding	47	chr19	4838341	4839194	-	[]	['ENST00000221957.9', 'ENST00000592528.5']	ENST00000221957.9	3UTR	protein_coding	47	chr19	4838341	4839194	-	ENST00000221957.9	3UTR	protein_coding	47	chr19	4838341	4839194	-
Merged-chr19-6440086-1	chr19	6440049	6440123	-	0	{'ENST00000301454.9': '3UTR'}	{'ENST00000301454.9': 'protein_coding'}	{'ENST00000301454.9': 60}	{'ENST00000301454.9': 'chr19'}	{'ENST00000301454.9': 6440064.0}	{'ENST00000301454.9': 6441977.0}	{'ENST00000301454.9': '-'}	ENST00000301454.9	3UTR	protein_coding	60	chr19	6440064	6441977	-	['ENST00000301454.9']	['ENST00000301454.9']	ENST00000301454.9	3UTR	protein_coding	60	chr19	6440064	6441977	-	[]	['ENST00000301454.9']	ENST00000301454.9	3UTR	protein_coding	60	chr19	6440064	6441977	-	ENST00000301454.9	3UTR	protein_coding	60	chr19	6440064	6441977	-
Merged-chr19-8322365-1	chr19	8322328	8322402	+	0	{'ENST00000600659.3': 'exon'}	{'ENST00000600659.3': 'protein_coding'}	{'ENST00000600659.3': 74}	{'ENST00000600659.3': 'chr19'}	{'ENST00000600659.3': 8322272.0}	{'ENST00000600659.3': 8323340.0}	{'ENST00000600659.3': '+'}	ENST00000600659.3	exon	protein_coding	74	chr19	8322272	8323340	+	['ENST00000600659.3']	['ENST00000600659.3']	ENST00000600659.3	exon	protein_coding	74	chr19	8322272	8323340	+	[]	[]	ENST00000600659.3	exon	protein_coding	74	chr19	8322272	8323340	+	ENST00000600659.3	exon	protein_coding	74	chr19	8322272	8323340	+
Merged-chr15-93000630-1	chr15	93000593	93000667	+	0	{'ENST00000626874.2': 'Intron'}	{'ENST00000626874.2': 'protein_coding'}	{'ENST00000626874.2': 28}	{'ENST00000626874.2': 'chr15'}	{'ENST00000626874.2': 93000640.0}	{'ENST00000626874.2': 93002176.0}	{'ENST00000626874.2': '+'}	ENST00000626874.2	Intron	protein_coding	28	chr15	93000640	93002176	+	['ENST00000626874.2']	[]	ENST00000626874.2	Intron	protein_coding	28	chr15	93000640	93002176	+	[]	[]	ENST00000626874.2	Intron	protein_coding	28	chr15	93000640	93002176	+	ENST00000626874.2	Intron	protein_coding	28	chr15	93000640	93002176	+
Merged-chr15-98961356-1	chr15	98961319	98961393	+	0	{'ENST00000650285.1': '3UTR', 'ENST00000559468.1': 'Intron'}	{'ENST00000650285.1': 'protein_coding', 'ENST00000559468.1': 'lncRNA'}	{'ENST00000650285.1': 74, 'ENST00000559468.1': 74}	{'ENST00000650285.1': 'chr15', 'ENST00000559468.1': 'chr15'}	{'ENST00000650285.1': 98957440.0, 'ENST00000559468.1': 98954388.0}	{'ENST00000650285.1': 98964530.0, 'ENST00000559468.1': 98965988.0}	{'ENST00000650285.1': '+', 'ENST00000559468.1': '-'}	ENST00000650285.1	3UTR	protein_coding	74	chr15	98957440	98964530	+	['ENST00000650285.1', 'ENST00000559468.1']	['ENST00000650285.1']	ENST00000650285.1	3UTR	protein_coding	74	chr15	98957440	98964530	+	[]	['ENST00000650285.1']	ENST00000650285.1	3UTR	protein_coding	74	chr15	98957440	98964530	+	ENST00000650285.1	3UTR	protein_coding	74	chr15	98957440	98964530	+
Merged-chr15-25438582-1	chr15	25438545	25438619	-	0	{'ENST00000638011.1': 'exon', 'ENST00000637886.1': 'exon', 'ENST00000638155.1': 'exon', 'ENST00000635914.1': 'exon', 'ENST00000438097.6': 'exon', 'ENST00000648336.2': 'exon', 'ENST00000630424.2': 'exon', 'ENST00000625778.3': 'exon'}	{'ENST00000638011.1': 'protein_coding', 'ENST00000637886.1': 'protein_coding', 'ENST00000638155.1': 'protein_coding', 'ENST00000635914.1': 'protein_coding', 'ENST00000438097.6': 'protein_coding', 'ENST00000648336.2': 'protein_coding', 'ENST00000630424.2': 'protein_coding', 'ENST00000625778.3': 'protein_coding'}	{'ENST00000638011.1': 74, 'ENST00000637886.1': 74, 'ENST00000638155.1': 74, 'ENST00000635914.1': 74, 'ENST00000438097.6': 74, 'ENST00000648336.2': 74, 'ENST00000630424.2': 74, 'ENST00000625778.3': 74}	{'ENST00000638011.1': 'chr15', 'ENST00000637886.1': 'chr15', 'ENST00000638155.1': 'chr15', 'ENST00000635914.1': 'chr15', 'ENST00000438097.6': 'chr15', 'ENST00000648336.2': 'chr15', 'ENST00000630424.2': 'chr15', 'ENST00000625778.3': 'chr15'}	{'ENST00000638011.1': 25438489.0, 'ENST00000637886.1': 25438489.0, 'ENST00000638155.1': 25438489.0, 'ENST00000635914.1': 25438489.0, 'ENST00000438097.6': 25438489.0, 'ENST00000648336.2': 25438489.0, 'ENST00000630424.2': 25438489.0, 'ENST00000625778.3': 25438489.0}	{'ENST00000638011.1': 25438925.0, 'ENST00000637886.1': 25438985.0, 'ENST00000638155.1': 25438986.0, 'ENST00000635914.1': 25439005.0, 'ENST00000438097.6': 25439008.0, 'ENST00000648336.2': 25439024.0, 'ENST00000630424.2': 25438694.0, 'ENST00000625778.3': 25439051.0}	{'ENST00000638011.1': '-', 'ENST00000637886.1': '-', 'ENST00000638155.1': '-', 'ENST00000635914.1': '-', 'ENST00000438097.6': '-', 'ENST00000648336.2': '-', 'ENST00000630424.2': '-', 'ENST00000625778.3': '-'}	ENST00000638011.1	exon	protein_coding	74	chr15	25438489	25438925	-	['ENST00000638011.1', 'ENST00000637886.1', 'ENST00000638155.1', 'ENST00000635914.1', 'ENST00000438097.6', 'ENST00000648336.2', 'ENST00000630424.2', 'ENST00000625778.3']	['ENST00000648336.2']	ENST00000648336.2	exon	protein_coding	74	chr15	25438489	25439024	-	[]	[]	ENST00000648336.2	exon	protein_coding	74	chr15	25438489	25439024	-	ENST00000648336.2	exon	protein_coding	74	chr15	25438489	25439024	-
Merged-chr2-206162919-1	chr2	206162882	206162956	+	0	{'ENST00000236957.9': '3UTR', 'ENST00000392221.5': '3UTR'}	{'ENST00000236957.9': 'protein_coding', 'ENST00000392221.5': 'protein_coding'}	{'ENST00000236957.9': 46, 'ENST00000392221.5': 45}	{'ENST00000236957.9': 'chr2', 'ENST00000392221.5': 'chr2'}	{'ENST00000236957.9': 206162881.0, 'ENST00000392221.5': 206162881.0}	{'ENST00000236957.9': 206162928.0, 'ENST00000392221.5': 206162927.0}	{'ENST00000236957.9': '+', 'ENST00000392221.5': '+'}	ENST00000236957.9	3UTR	protein_coding	46	chr2	206162881	206162928	+	['ENST00000236957.9', 'ENST00000392221.5']	[]	ENST00000236957.9	3UTR	protein_coding	46	chr2	206162881	206162928	+	[]	['ENST00000236957.9', 'ENST00000392221.5']	ENST00000236957.9	3UTR	protein_coding	46	chr2	206162881	206162928	+	ENST00000236957.9	3UTR	protein_coding	46	chr2	206162881	206162928	+
Merged-chr15-40035468-1	chr15	40035431	40035505	+	0	{'ENST00000263791.10': '3UTR'}	{'ENST00000263791.10': 'protein_coding'}	{'ENST00000263791.10': 74}	{'ENST00000263791.10': 'chr15'}	{'ENST00000263791.10': 40035082.0}	{'ENST00000263791.10': 40035591.0}	{'ENST00000263791.10': '+'}	ENST00000263791.10	3UTR	protein_coding	74	chr15	40035082	40035591	+	['ENST00000263791.10']	['ENST00000263791.10']	ENST00000263791.10	3UTR	protein_coding	74	chr15	40035082	40035591	+	[]	['ENST00000263791.10']	ENST00000263791.10	3UTR	protein_coding	74	chr15	40035082	40035591	+	ENST00000263791.10	3UTR	protein_coding	74	chr15	40035082	40035591	+
Merged-chr15-41299290-1	chr15	41299253	41299327	+	0	{'ENST00000707007.1': 'exon', 'ENST00000707056.1': 'exon', 'ENST00000561275.6': 'exon', 'ENST00000707010.1': 'exon', 'ENST00000558945.6': 'exon', 'ENST00000707027.1': 'exon', 'ENST00000707042.1': 'exon', 'ENST00000707061.1': 'exon', 'ENST00000707013.1': 'Intron', 'ENST00000500949.7': 'exon', 'ENST00000707008.1': 'Intron', 'ENST00000707046.1': 'Intron', 'ENST00000707052.1': 'Intron', 'ENST00000661…	{'ENST00000707007.1': 'lncRNA', 'ENST00000707056.1': 'lncRNA', 'ENST00000561275.6': 'lncRNA', 'ENST00000707010.1': 'lncRNA', 'ENST00000558945.6': 'lncRNA', 'ENST00000707027.1': 'lncRNA', 'ENST00000707042.1': 'lncRNA', 'ENST00000707061.1': 'lncRNA', 'ENST00000707013.1': 'lncRNA', 'ENST00000500949.7': 'lncRNA', 'ENST00000707008.1': 'lncRNA', 'ENST00000707046.1': 'lncRNA', 'ENST00000707052.1': 'lncR…	{'ENST00000707007.1': 74, 'ENST00000707056.1': 74, 'ENST00000561275.6': 74, 'ENST00000707010.1': 74, 'ENST00000558945.6': 74, 'ENST00000707027.1': 74, 'ENST00000707042.1': 74, 'ENST00000707061.1': 74, 'ENST00000707013.1': 74, 'ENST00000500949.7': 74, 'ENST00000707008.1': 74, 'ENST00000707046.1': 74, 'ENST00000707052.1': 74, 'ENST00000661438.1': 74}	{'ENST00000707007.1': 'chr15', 'ENST00000707056.1': 'chr15', 'ENST00000561275.6': 'chr15', 'ENST00000707010.1': 'chr15', 'ENST00000558945.6': 'chr15', 'ENST00000707027.1': 'chr15', 'ENST00000707042.1': 'chr15', 'ENST00000707061.1': 'chr15', 'ENST00000707013.1': 'chr15', 'ENST00000500949.7': 'chr15', 'ENST00000707008.1': 'chr15', 'ENST00000707046.1': 'chr15', 'ENST00000707052.1': 'chr15', 'ENST000…	{'ENST00000707007.1': 41298041.0, 'ENST00000707056.1': 41298847.0, 'ENST00000561275.6': 41298041.0, 'ENST00000707010.1': 41298041.0, 'ENST00000558945.6': 41298041.0, 'ENST00000707027.1': 41298041.0, 'ENST00000707042.1': 41298041.0, 'ENST00000707061.1': 41298803.0, 'ENST00000707013.1': 41298334.0, 'ENST00000500949.7': 41298041.0, 'ENST00000707008.1': 41298619.0, 'ENST00000707046.1': 41286100.0, 'E…	{'ENST00000707007.1': 41301959.0, 'ENST00000707056.1': 41299628.0, 'ENST00000561275.6': 41299628.0, 'ENST00000707010.1': 41301958.0, 'ENST00000558945.6': 41301999.0, 'ENST00000707027.1': 41299624.0, 'ENST00000707042.1': 41299442.0, 'ENST00000707061.1': 41301998.0, 'ENST00000707013.1': 41299675.0, 'ENST00000500949.7': 41306539.0, 'ENST00000707008.1': 41305474.0, 'ENST00000707046.1': 41319684.0, 'E…	{'ENST00000707007.1': '+', 'ENST00000707056.1': '+', 'ENST00000561275.6': '+', 'ENST00000707010.1': '+', 'ENST00000558945.6': '+', 'ENST00000707027.1': '+', 'ENST00000707042.1': '+', 'ENST00000707061.1': '+', 'ENST00000707013.1': '+', 'ENST00000500949.7': '+', 'ENST00000707008.1': '+', 'ENST00000707046.1': '+', 'ENST00000707052.1': '+', 'ENST00000661438.1': '+'}	ENST00000707056.1	exon	lncRNA	74	chr15	41298847	41299628	+	['ENST00000707007.1', 'ENST00000707056.1', 'ENST00000561275.6', 'ENST00000707010.1', 'ENST00000558945.6', 'ENST00000707027.1', 'ENST00000707042.1', 'ENST00000707061.1', 'ENST00000707013.1', 'ENST00000500949.7', 'ENST00000707008.1', 'ENST00000707046.1', 'ENST00000707052.1', 'ENST00000661438.1']	[]	ENST00000707056.1	exon	lncRNA	74	chr15	41298847	41299628	+	[]	[]	ENST00000707056.1	exon	lncRNA	74	chr15	41298847	41299628	+	ENST00000707056.1	exon	lncRNA	74	chr15	41298847	41299628	+
Merged-chr15-42542519-1	chr15	42542482	42542556	-	0	{'ENST00000323443.6': '3UTR', 'ENST00000397130.8': '3UTR', 'ENST00000563454.5': '3UTR', 'ENST00000650210.1': 'Intron'}	{'ENST00000323443.6': 'protein_coding', 'ENST00000397130.8': 'protein_coding', 'ENST00000563454.5': 'protein_coding', 'ENST00000650210.1': 'protein_coding'}	{'ENST00000323443.6': 74, 'ENST00000397130.8': 74, 'ENST00000563454.5': 33, 'ENST00000650210.1': 74}	{'ENST00000323443.6': 'chr15', 'ENST00000397130.8': 'chr15', 'ENST00000563454.5': 'chr15', 'ENST00000650210.1': 'chr15'}	{'ENST00000323443.6': 42537820.0, 'ENST00000397130.8': 42537829.0, 'ENST00000563454.5': 42542524.0, 'ENST00000650210.1': 42531069.0}	{'ENST00000323443.6': 42544085.0, 'ENST00000397130.8': 42544085.0, 'ENST00000563454.5': 42544085.0, 'ENST00000650210.1': 42545076.0}	{'ENST00000323443.6': '-', 'ENST00000397130.8': '-', 'ENST00000563454.5': '-', 'ENST00000650210.1': '-'}	ENST00000397130.8	3UTR	protein_coding	74	chr15	42537829	42544085	-	['ENST00000323443.6', 'ENST00000397130.8', 'ENST00000563454.5', 'ENST00000650210.1']	['ENST00000397130.8']	ENST00000397130.8	3UTR	protein_coding	74	chr15	42537829	42544085	-	[]	['ENST00000323443.6', 'ENST00000397130.8', 'ENST00000563454.5']	ENST00000323443.6	3UTR	protein_coding	74	chr15	42537820	42544085	-	ENST00000397130.8	3UTR	protein_coding	74	chr15	42537829	42544085	-
Merged-chr2-55235575-1	chr2	55235538	55235612	+	0	{'ENST00000402285.7': '3UTR', 'ENST00000404735.1': '3UTR', 'ENST00000272317.11': '3UTR', 'ENST00000686015.1': 'exon'}	{'ENST00000402285.7': 'protein_coding', 'ENST00000404735.1': 'protein_coding', 'ENST00000272317.11': 'protein_coding', 'ENST00000686015.1': 'lncRNA'}	{'ENST00000402285.7': 14, 'ENST00000404735.1': 38, 'ENST00000272317.11': 38, 'ENST00000686015.1': 8}	{'ENST00000402285.7': 'chr2', 'ENST00000404735.1': 'chr2', 'ENST00000272317.11': 'chr2', 'ENST00000686015.1': 'chr2'}	{'ENST00000402285.7': 55235575.0, 'ENST00000404735.1': 55235575.0, 'ENST00000272317.11': 55235575.0, 'ENST00000686015.1': 55235605.0}	{'ENST00000402285.7': 55235588.0, 'ENST00000404735.1': 55235755.0, 'ENST00000272317.11': 55235853.0, 'ENST00000686015.1': 55236047.0}	{'ENST00000402285.7': '+', 'ENST00000404735.1': '+', 'ENST00000272317.11': '+', 'ENST00000686015.1': '-'}	ENST00000404735.1	3UTR	protein_coding	38	chr2	55235575	55235755	+	['ENST00000402285.7', 'ENST00000404735.1', 'ENST00000272317.11', 'ENST00000686015.1']	['ENST00000272317.11']	ENST00000272317.11	3UTR	protein_coding	38	chr2	55235575	55235853	+	[]	['ENST00000402285.7', 'ENST00000404735.1', 'ENST00000272317.11']	ENST00000404735.1	3UTR	protein_coding	38	chr2	55235575	55235755	+	ENST00000272317.11	3UTR	protein_coding	38	chr2	55235575	55235853	+
Merged-chr2-61868437-1	chr2	61868400	61868474	-	0	{'ENST00000394440.8': '3UTR', 'ENST00000544079.2': '3UTR', 'ENST00000425779.1': 'exon'}	{'ENST00000394440.8': 'protein_coding', 'ENST00000544079.2': 'protein_coding', 'ENST00000425779.1': 'lncRNA'}	{'ENST00000394440.8': 74, 'ENST00000544079.2': 74, 'ENST00000425779.1': 43}	{'ENST00000394440.8': 'chr2', 'ENST00000544079.2': 'chr2', 'ENST00000425779.1': 'chr2'}	{'ENST00000394440.8': 61868085.0, 'ENST00000544079.2': 61868125.0, 'ENST00000425779.1': 61868432.0}	{'ENST00000394440.8': 61868694.0, 'ENST00000544079.2': 61868694.0, 'ENST00000425779.1': 61868865.0}	{'ENST00000394440.8': '-', 'ENST00000544079.2': '-', 'ENST00000425779.1': '+'}	ENST00000544079.2	3UTR	protein_coding	74	chr2	61868125	61868694	-	['ENST00000394440.8', 'ENST00000544079.2', 'ENST00000425779.1']	['ENST00000394440.8']	ENST00000394440.8	3UTR	protein_coding	74	chr2	61868085	61868694	-	[]	['ENST00000394440.8', 'ENST00000544079.2']	ENST00000394440.8	3UTR	protein_coding	74	chr2	61868085	61868694	-	ENST00000394440.8	3UTR	protein_coding	74	chr2	61868085	61868694	-
Merged-chr15-44412901-1	chr15	44412864	44412938	+	0	{'ENST00000299957.11': 'Intron', 'ENST00000558047.1': 'Intron', 'ENST00000345795.6': 'Intron'}	{'ENST00000299957.11': 'protein_coding', 'ENST00000558047.1': 'lncRNA', 'ENST00000345795.6': 'protein_coding'}	{'ENST00000299957.11': 74, 'ENST00000558047.1': 74, 'ENST00000345795.6': 74}	{'ENST00000299957.11': 'chr15', 'ENST00000558047.1': 'chr15', 'ENST00000345795.6': 'chr15'}	{'ENST00000299957.11': 44403054.0, 'ENST00000558047.1': 44405402.0, 'ENST00000345795.6': 44380976.0}	{'ENST00000299957.11': 44413335.0, 'ENST00000558047.1': 44413333.0, 'ENST00000345795.6': 44413335.0}	{'ENST00000299957.11': '+', 'ENST00000558047.1': '-', 'ENST00000345795.6': '+'}	ENST00000558047.1	Intron	lncRNA	74	chr15	44405402	44413333	-	['ENST00000299957.11', 'ENST00000558047.1', 'ENST00000345795.6']	['ENST00000299957.11']	ENST00000299957.11	Intron	protein_coding	74	chr15	44403054	44413335	+	[]	[]	ENST00000299957.11	Intron	protein_coding	74	chr15	44403054	44413335	+	ENST00000299957.11	Intron	protein_coding	74	chr15	44403054	44413335	+
Merged-chr15-51683282-1	chr15	51683245	51683319	+	0	{'ENST00000542355.6': 'exon'}	{'ENST00000542355.6': 'protein_coding'}	{'ENST00000542355.6': 74}	{'ENST00000542355.6': 'chr15'}	{'ENST00000542355.6': 51683219.0}	{'ENST00000542355.6': 51683434.0}	{'ENST00000542355.6': '+'}	ENST00000542355.6	exon	protein_coding	74	chr15	51683219	51683434	+	['ENST00000542355.6']	[]	ENST00000542355.6	exon	protein_coding	74	chr15	51683219	51683434	+	[]	[]	ENST00000542355.6	exon	protein_coding	74	chr15	51683219	51683434	+	ENST00000542355.6	exon	protein_coding	74	chr15	51683219	51683434	+
Merged-chr15-52019410-1	chr15	52019373	52019447	+	0	{'ENST00000691380.1': 'Intron', 'ENST00000681888.1': 'Intron', 'ENST00000261845.7': 'Intron', 'ENST00000680066.1': 'Intron', 'ENST00000680777.1': 'Intron', 'ENST00000680652.1': 'Intron'}	{'ENST00000691380.1': 'protein_coding', 'ENST00000681888.1': 'protein_coding', 'ENST00000261845.7': 'protein_coding', 'ENST00000680066.1': 'protein_coding', 'ENST00000680777.1': 'protein_coding', 'ENST00000680652.1': 'protein_coding'}	{'ENST00000691380.1': 74, 'ENST00000681888.1': 58, 'ENST00000261845.7': 72, 'ENST00000680066.1': 74, 'ENST00000680777.1': 74, 'ENST00000680652.1': 66}	{'ENST00000691380.1': 'chr15', 'ENST00000681888.1': 'chr15', 'ENST00000261845.7': 'chr15', 'ENST00000680066.1': 'chr15', 'ENST00000680777.1': 'chr15', 'ENST00000680652.1': 'chr15'}	{'ENST00000691380.1': 52004402.0, 'ENST00000681888.1': 52019390.0, 'ENST00000261845.7': 52019376.0, 'ENST00000680066.1': 52019371.0, 'ENST00000680777.1': 52019362.0, 'ENST00000680652.1': 52019382.0}	{'ENST00000691380.1': 52045829.0, 'ENST00000681888.1': 52045829.0, 'ENST00000261845.7': 52045829.0, 'ENST00000680066.1': 52045829.0, 'ENST00000680777.1': 52045829.0, 'ENST00000680652.1': 52045829.0}	{'ENST00000691380.1': '+', 'ENST00000681888.1': '+', 'ENST00000261845.7': '+', 'ENST00000680066.1': '+', 'ENST00000680777.1': '+', 'ENST00000680652.1': '+'}	ENST00000680066.1	Intron	protein_coding	74	chr15	52019371	52045829	+	['ENST00000691380.1', 'ENST00000681888.1', 'ENST00000261845.7', 'ENST00000680066.1', 'ENST00000680777.1', 'ENST00000680652.1']	['ENST00000261845.7']	ENST00000261845.7	Intron	protein_coding	72	chr15	52019376	52045829	+	[]	[]	ENST00000261845.7	Intron	protein_coding	72	chr15	52019376	52045829	+	ENST00000261845.7	Intron	protein_coding	72	chr15	52019376	52045829	+
Merged-chr15-52121713-1	chr15	52121676	52121750	-	0	{'ENST00000396335.8': '3UTR', 'ENST00000559825.1': 'exon', 'ENST00000261837.12': '3UTR'}	{'ENST00000396335.8': 'protein_coding', 'ENST00000559825.1': 'lncRNA', 'ENST00000261837.12': 'protein_coding'}	{'ENST00000396335.8': 74, 'ENST00000559825.1': 74, 'ENST00000261837.12': 74}	{'ENST00000396335.8': 'chr15', 'ENST00000559825.1': 'chr15', 'ENST00000261837.12': 'chr15'}	{'ENST00000396335.8': 52120939.0, 'ENST00000559825.1': 52121653.0, 'ENST00000261837.12': 52115100.0}	{'ENST00000396335.8': 52122759.0, 'ENST00000559825.1': 52122131.0, 'ENST00000261837.12': 52122759.0}	{'ENST00000396335.8': '-', 'ENST00000559825.1': '+', 'ENST00000261837.12': '-'}	ENST00000559825.1	exon	lncRNA	74	chr15	52121653	52122131	+	['ENST00000396335.8', 'ENST00000559825.1', 'ENST00000261837.12']	['ENST00000261837.12']	ENST00000261837.12	3UTR	protein_coding	74	chr15	52115100	52122759	-	[]	['ENST00000396335.8', 'ENST00000261837.12']	ENST00000396335.8	3UTR	protein_coding	74	chr15	52120939	52122759	-	ENST00000261837.12	3UTR	protein_coding	74	chr15	52115100	52122759	-
Merged-chr15-52550173-1	chr15	52550136	52550210	-	0	{'ENST00000249822.9': '3UTR', 'ENST00000561650.5': '3UTR'}	{'ENST00000249822.9': 'protein_coding', 'ENST00000561650.5': 'protein_coding'}	{'ENST00000249822.9': 74, 'ENST00000561650.5': 74}	{'ENST00000249822.9': 'chr15', 'ENST00000561650.5': 'chr15'}	{'ENST00000249822.9': 52547045.0, 'ENST00000561650.5': 52549527.0}	{'ENST00000249822.9': 52551936.0, 'ENST00000561650.5': 52551936.0}	{'ENST00000249822.9': '-', 'ENST00000561650.5': '-'}	ENST00000561650.5	3UTR	protein_coding	74	chr15	52549527	52551936	-	['ENST00000249822.9', 'ENST00000561650.5']	['ENST00000249822.9']	ENST00000249822.9	3UTR	protein_coding	74	chr15	52547045	52551936	-	[]	['ENST00000249822.9', 'ENST00000561650.5']	ENST00000249822.9	3UTR	protein_coding	74	chr15	52547045	52551936	-	ENST00000249822.9	3UTR	protein_coding	74	chr15	52547045	52551936	-
Merged-chr15-55545642-1	chr15	55545605	55545679	-	0	{'ENST00000645724.1': 'Intron', 'ENST00000563719.4': '3UTR', 'ENST00000302000.10': '3UTR'}	{'ENST00000645724.1': 'protein_coding', 'ENST00000563719.4': 'protein_coding', 'ENST00000302000.10': 'protein_coding'}	{'ENST00000645724.1': 74, 'ENST00000563719.4': 74, 'ENST00000302000.10': 74}	{'ENST00000645724.1': 'chr15', 'ENST00000563719.4': 'chr15', 'ENST00000302000.10': 'chr15'}	{'ENST00000645724.1': 55545225.0, 'ENST00000563719.4': 55538884.0, 'ENST00000302000.10': 55538890.0}	{'ENST00000645724.1': 55546004.0, 'ENST00000563719.4': 55546025.0, 'ENST00000302000.10': 55546025.0}	{'ENST00000645724.1': '-', 'ENST00000563719.4': '-', 'ENST00000302000.10': '-'}	ENST00000645724.1	Intron	protein_coding	74	chr15	55545225	55546004	-	['ENST00000645724.1', 'ENST00000563719.4', 'ENST00000302000.10']	['ENST00000563719.4']	ENST00000563719.4	3UTR	protein_coding	74	chr15	55538884	55546025	-	[]	['ENST00000563719.4', 'ENST00000302000.10']	ENST00000563719.4	3UTR	protein_coding	74	chr15	55538884	55546025	-	ENST00000563719.4	3UTR	protein_coding	74	chr15	55538884	55546025	-
Merged-chr15-57253443-1	chr15	57253406	57253480	+	0	{'ENST00000438423.6': 'Intron'}	{'ENST00000438423.6': 'protein_coding'}	{'ENST00000438423.6': 13}	{'ENST00000438423.6': 'chr15'}	{'ENST00000438423.6': 57253468.0}	{'ENST00000438423.6': 57262093.0}	{'ENST00000438423.6': '+'}	ENST00000438423.6	Intron	protein_coding	13	chr15	57253468	57262093	+	['ENST00000438423.6']	[]	ENST00000438423.6	Intron	protein_coding	13	chr15	57253468	57262093	+	[]	[]	ENST00000438423.6	Intron	protein_coding	13	chr15	57253468	57262093	+	ENST00000438423.6	Intron	protein_coding	13	chr15	57253468	57262093	+
Merged-chr15-58717655-1	chr15	58717618	58717692	-	0	{'ENST00000260408.8': 'exon', 'ENST00000402627.5': 'Intron', 'ENST00000561288.1': 'Intron'}	{'ENST00000260408.8': 'protein_coding', 'ENST00000402627.5': 'protein_coding', 'ENST00000561288.1': 'protein_coding'}	{'ENST00000260408.8': 74, 'ENST00000402627.5': 74, 'ENST00000561288.1': 74}	{'ENST00000260408.8': 'chr15', 'ENST00000402627.5': 'chr15', 'ENST00000561288.1': 'chr15'}	{'ENST00000260408.8': 58717577.0, 'ENST00000402627.5': 58640830.0, 'ENST00000561288.1': 58597518.0}	{'ENST00000260408.8': 58717727.0, 'ENST00000402627.5': 58749479.0, 'ENST00000561288.1': 58749479.0}	{'ENST00000260408.8': '-', 'ENST00000402627.5': '-', 'ENST00000561288.1': '-'}	ENST00000260408.8	exon	protein_coding	74	chr15	58717577	58717727	-	['ENST00000260408.8', 'ENST00000402627.5', 'ENST00000561288.1']	['ENST00000260408.8']	ENST00000260408.8	exon	protein_coding	74	chr15	58717577	58717727	-	[]	[]	ENST00000260408.8	exon	protein_coding	74	chr15	58717577	58717727	-	ENST00000260408.8	exon	protein_coding	74	chr15	58717577	58717727	-
Merged-chr15-59679637-1	chr15	59679600	59679674	-	0	{'ENST00000607373.6': 'exon'}	{'ENST00000607373.6': 'protein_coding'}	{'ENST00000607373.6': 74}	{'ENST00000607373.6': 'chr15'}	{'ENST00000607373.6': 59679592.0}	{'ENST00000607373.6': 59679768.0}	{'ENST00000607373.6': '-'}	ENST00000607373.6	exon	protein_coding	74	chr15	59679592	59679768	-	['ENST00000607373.6']	['ENST00000607373.6']	ENST00000607373.6	exon	protein_coding	74	chr15	59679592	59679768	-	[]	[]	ENST00000607373.6	exon	protein_coding	74	chr15	59679592	59679768	-	ENST00000607373.6	exon	protein_coding	74	chr15	59679592	59679768	-
Merged-chr15-63266688-1	chr15	63266651	63266725	+	0	{'ENST00000321437.9': '3UTR'}	{'ENST00000321437.9': 'protein_coding'}	{'ENST00000321437.9': 74}	{'ENST00000321437.9': 'chr15'}	{'ENST00000321437.9': 63263617.0}	{'ENST00000321437.9': 63267776.0}	{'ENST00000321437.9': '+'}	ENST00000321437.9	3UTR	protein_coding	74	chr15	63263617	63267776	+	['ENST00000321437.9']	['ENST00000321437.9']	ENST00000321437.9	3UTR	protein_coding	74	chr15	63263617	63267776	+	[]	['ENST00000321437.9']	ENST00000321437.9	3UTR	protein_coding	74	chr15	63263617	63267776	+	ENST00000321437.9	3UTR	protein_coding	74	chr15	63263617	63267776	+
Merged-chr15-64495917-1	chr15	64495880	64495954	-	0	{'ENST00000326648.5': 'Intron'}	{'ENST00000326648.5': 'protein_coding'}	{'ENST00000326648.5': 74}	{'ENST00000326648.5': 'chr15'}	{'ENST00000326648.5': 64460838.0}	{'ENST00000326648.5': 64499292.0}	{'ENST00000326648.5': '+'}	ENST00000326648.5	Intron	protein_coding	74	chr15	64460838	64499292	+	['ENST00000326648.5']	['ENST00000326648.5']	ENST00000326648.5	Intron	protein_coding	74	chr15	64460838	64499292	+	[]	[]	ENST00000326648.5	Intron	protein_coding	74	chr15	64460838	64499292	+	ENST00000326648.5	Intron	protein_coding	74	chr15	64460838	64499292	+
Merged-chr2-209730869-1	chr2	209730832	209730906	+	0	{'ENST00000682079.1': '3UTR', 'ENST00000704357.1': '3UTR', 'ENST00000360351.8': '3UTR'}	{'ENST00000682079.1': 'protein_coding', 'ENST00000704357.1': 'protein_coding', 'ENST00000360351.8': 'protein_coding'}	{'ENST00000682079.1': 74, 'ENST00000704357.1': 74, 'ENST00000360351.8': 74}	{'ENST00000682079.1': 'chr2', 'ENST00000704357.1': 'chr2', 'ENST00000360351.8': 'chr2'}	{'ENST00000682079.1': 209730395.0, 'ENST00000704357.1': 209730395.0, 'ENST00000360351.8': 209730395.0}	{'ENST00000682079.1': 209734112.0, 'ENST00000704357.1': 209734147.0, 'ENST00000360351.8': 209734118.0}	{'ENST00000682079.1': '+', 'ENST00000704357.1': '+', 'ENST00000360351.8': '+'}	ENST00000682079.1	3UTR	protein_coding	74	chr2	209730395	209734112	+	['ENST00000682079.1', 'ENST00000704357.1', 'ENST00000360351.8']	['ENST00000682079.1']	ENST00000682079.1	3UTR	protein_coding	74	chr2	209730395	209734112	+	[]	['ENST00000682079.1', 'ENST00000704357.1', 'ENST00000360351.8']	ENST00000682079.1	3UTR	protein_coding	74	chr2	209730395	209734112	+	ENST00000682079.1	3UTR	protein_coding	74	chr2	209730395	209734112	+
Merged-chr15-64952507-1	chr15	64952470	64952544	-	0	{'ENST00000319580.13': 'Intron'}	{'ENST00000319580.13': 'protein_coding'}	{'ENST00000319580.13': 74}	{'ENST00000319580.13': 'chr15'}	{'ENST00000319580.13': 64949972.0}	{'ENST00000319580.13': 64957102.0}	{'ENST00000319580.13': '+'}	ENST00000319580.13	Intron	protein_coding	74	chr15	64949972	64957102	+	['ENST00000319580.13']	['ENST00000319580.13']	ENST00000319580.13	Intron	protein_coding	74	chr15	64949972	64957102	+	[]	[]	ENST00000319580.13	Intron	protein_coding	74	chr15	64949972	64957102	+	ENST00000319580.13	Intron	protein_coding	74	chr15	64949972	64957102	+
Merged-chr15-65556800-1	chr15	65556763	65556837	+	0	{'ENST00000562901.5': 'AltUTR', 'ENST00000442729.6': 'Intron'}	{'ENST00000562901.5': 'protein_coding', 'ENST00000442729.6': 'protein_coding'}	{'ENST00000562901.5': 74, 'ENST00000442729.6': 74}	{'ENST00000562901.5': 'chr15', 'ENST00000442729.6': 'chr15'}	{'ENST00000562901.5': 65556739.0, 'ENST00000442729.6': 65554960.0}	{'ENST00000562901.5': 65556885.0, 'ENST00000442729.6': 65558679.0}	{'ENST00000562901.5': '+', 'ENST00000442729.6': '+'}	ENST00000562901.5	AltUTR	protein_coding	74	chr15	65556739	65556885	+	['ENST00000562901.5', 'ENST00000442729.6']	[]	ENST00000562901.5	AltUTR	protein_coding	74	chr15	65556739	65556885	+	[]	[]	ENST00000562901.5	AltUTR	protein_coding	74	chr15	65556739	65556885	+	ENST00000562901.5	AltUTR	protein_coding	74	chr15	65556739	65556885	+
Merged-chr15-68295638-1	chr15	68295601	68295675	+	0	{'ENST00000306917.5': '3UTR'}	{'ENST00000306917.5': 'protein_coding'}	{'ENST00000306917.5': 74}	{'ENST00000306917.5': 'chr15'}	{'ENST00000306917.5': 68291240.0}	{'ENST00000306917.5': 68295862.0}	{'ENST00000306917.5': '+'}	ENST00000306917.5	3UTR	protein_coding	74	chr15	68291240	68295862	+	['ENST00000306917.5']	['ENST00000306917.5']	ENST00000306917.5	3UTR	protein_coding	74	chr15	68291240	68295862	+	[]	['ENST00000306917.5']	ENST00000306917.5	3UTR	protein_coding	74	chr15	68291240	68295862	+	ENST00000306917.5	3UTR	protein_coding	74	chr15	68291240	68295862	+
Merged-chr15-70656939-1	chr15	70656902	70656976	-	0	{'ENST00000322954.11': '3UTR', 'ENST00000379983.6': '3UTR', 'ENST00000560441.5': '3UTR'}	{'ENST00000322954.11': 'protein_coding', 'ENST00000379983.6': 'protein_coding', 'ENST00000560441.5': 'protein_coding'}	{'ENST00000322954.11': 74, 'ENST00000379983.6': 74, 'ENST00000560441.5': 45}	{'ENST00000322954.11': 'chr15', 'ENST00000379983.6': 'chr15', 'ENST00000560441.5': 'chr15'}	{'ENST00000322954.11': 70654554.0, 'ENST00000379983.6': 70656802.0, 'ENST00000560441.5': 70656932.0}	{'ENST00000322954.11': 70657058.0, 'ENST00000379983.6': 70657058.0, 'ENST00000560441.5': 70657058.0}	{'ENST00000322954.11': '-', 'ENST00000379983.6': '-', 'ENST00000560441.5': '-'}	ENST00000379983.6	3UTR	protein_coding	74	chr15	70656802	70657058	-	['ENST00000322954.11', 'ENST00000379983.6', 'ENST00000560441.5']	['ENST00000322954.11']	ENST00000322954.11	3UTR	protein_coding	74	chr15	70654554	70657058	-	[]	['ENST00000322954.11', 'ENST00000379983.6', 'ENST00000560441.5']	ENST00000322954.11	3UTR	protein_coding	74	chr15	70654554	70657058	-	ENST00000322954.11	3UTR	protein_coding	74	chr15	70654554	70657058	-
Merged-chr15-72751372-1	chr15	72751335	72751409	-	0	{'ENST00000456471.3': '3UTR', 'ENST00000311669.12': '3UTR'}	{'ENST00000456471.3': 'protein_coding', 'ENST00000311669.12': 'protein_coding'}	{'ENST00000456471.3': 74, 'ENST00000311669.12': 41}	{'ENST00000456471.3': 'chr15', 'ENST00000311669.12': 'chr15'}	{'ENST00000456471.3': 72751294.0, 'ENST00000311669.12': 72751369.0}	{'ENST00000456471.3': 72752343.0, 'ENST00000311669.12': 72752343.0}	{'ENST00000456471.3': '-', 'ENST00000311669.12': '-'}	ENST00000456471.3	3UTR	protein_coding	74	chr15	72751294	72752343	-	['ENST00000456471.3', 'ENST00000311669.12']	['ENST00000456471.3']	ENST00000456471.3	3UTR	protein_coding	74	chr15	72751294	72752343	-	[]	['ENST00000456471.3', 'ENST00000311669.12']	ENST00000456471.3	3UTR	protein_coding	74	chr15	72751294	72752343	-	ENST00000456471.3	3UTR	protein_coding	74	chr15	72751294	72752343	-
Merged-chr15-73304606-1	chr15	73304569	73304643	+	0	{'ENST00000339362.9': '3UTR'}	{'ENST00000339362.9': 'protein_coding'}	{'ENST00000339362.9': 74}	{'ENST00000339362.9': 'chr15'}	{'ENST00000339362.9': 73302694.0}	{'ENST00000339362.9': 73305205.0}	{'ENST00000339362.9': '+'}	ENST00000339362.9	3UTR	protein_coding	74	chr15	73302694	73305205	+	['ENST00000339362.9']	[]	ENST00000339362.9	3UTR	protein_coding	74	chr15	73302694	73305205	+	[]	['ENST00000339362.9']	ENST00000339362.9	3UTR	protein_coding	74	chr15	73302694	73305205	+	ENST00000339362.9	3UTR	protein_coding	74	chr15	73302694	73305205	+
Merged-chr2-205682971-1	chr2	205682934	205683008	+	0	{'ENST00000360409.7': '5UTR', 'ENST00000357785.10': '5UTR', 'ENST00000417189.5': 'Intron'}	{'ENST00000360409.7': 'protein_coding', 'ENST00000357785.10': 'protein_coding', 'ENST00000417189.5': 'protein_coding'}	{'ENST00000360409.7': 74, 'ENST00000357785.10': 74, 'ENST00000417189.5': 74}	{'ENST00000360409.7': 'chr2', 'ENST00000357785.10': 'chr2', 'ENST00000417189.5': 'chr2'}	{'ENST00000360409.7': 205682500.0, 'ENST00000357785.10': 205682501.0, 'ENST00000417189.5': 205682905.0}	{'ENST00000360409.7': 205683290.0, 'ENST00000357785.10': 205683290.0, 'ENST00000417189.5': 205683090.0}	{'ENST00000360409.7': '+', 'ENST00000357785.10': '+', 'ENST00000417189.5': '+'}	ENST00000417189.5	Intron	protein_coding	74	chr2	205682905	205683090	+	['ENST00000360409.7', 'ENST00000357785.10', 'ENST00000417189.5']	['ENST00000357785.10']	ENST00000357785.10	5UTR	protein_coding	74	chr2	205682501	205683290	+	['ENST00000360409.7', 'ENST00000357785.10']	[]	ENST00000357785.10	5UTR	protein_coding	74	chr2	205682501	205683290	+	ENST00000360409.7	5UTR	protein_coding	74	chr2	205682500	205683290	+
Merged-chr2-216675841-1	chr2	216675804	216675878	-	0	{'ENST00000233813.5': '3UTR'}	{'ENST00000233813.5': 'protein_coding'}	{'ENST00000233813.5': 74}	{'ENST00000233813.5': 'chr2'}	{'ENST00000233813.5': 216672105.0}	{'ENST00000233813.5': 216676753.0}	{'ENST00000233813.5': '-'}	ENST00000233813.5	3UTR	protein_coding	74	chr2	216672105	216676753	-	['ENST00000233813.5']	['ENST00000233813.5']	ENST00000233813.5	3UTR	protein_coding	74	chr2	216672105	216676753	-	[]	['ENST00000233813.5']	ENST00000233813.5	3UTR	protein_coding	74	chr2	216672105	216676753	-	ENST00000233813.5	3UTR	protein_coding	74	chr2	216672105	216676753	-
Merged-chr2-24067589-1	chr2	24067552	24067626	-	0	{'ENST00000233468.5': '3UTR'}	{'ENST00000233468.5': 'protein_coding'}	{'ENST00000233468.5': 41}	{'ENST00000233468.5': 'chr2'}	{'ENST00000233468.5': 24067586.0}	{'ENST00000233468.5': 24067764.0}	{'ENST00000233468.5': '-'}	ENST00000233468.5	3UTR	protein_coding	41	chr2	24067586	24067764	-	['ENST00000233468.5']	['ENST00000233468.5']	ENST00000233468.5	3UTR	protein_coding	41	chr2	24067586	24067764	-	[]	['ENST00000233468.5']	ENST00000233468.5	3UTR	protein_coding	41	chr2	24067586	24067764	-	ENST00000233468.5	3UTR	protein_coding	41	chr2	24067586	24067764	-
Merged-chr15-73739816-1	chr15	73739779	73739853	-	0	{'ENST00000569673.3': '3UTR'}	{'ENST00000569673.3': 'protein_coding'}	{'ENST00000569673.3': 74}	{'ENST00000569673.3': 'chr15'}	{'ENST00000569673.3': 73735458.0}	{'ENST00000569673.3': 73739919.0}	{'ENST00000569673.3': '-'}	ENST00000569673.3	3UTR	protein_coding	74	chr15	73735458	73739919	-	['ENST00000569673.3']	['ENST00000569673.3']	ENST00000569673.3	3UTR	protein_coding	74	chr15	73735458	73739919	-	[]	['ENST00000569673.3']	ENST00000569673.3	3UTR	protein_coding	74	chr15	73735458	73739919	-	ENST00000569673.3	3UTR	protein_coding	74	chr15	73735458	73739919	-
Merged-chr15-75868996-1	chr15	75868959	75869033	+	0	{'ENST00000569423.5': 'Intron'}	{'ENST00000569423.5': 'protein_coding'}	{'ENST00000569423.5': 24}	{'ENST00000569423.5': 'chr15'}	{'ENST00000569423.5': 75869010.0}	{'ENST00000569423.5': 75873427.0}	{'ENST00000569423.5': '+'}	ENST00000569423.5	Intron	protein_coding	24	chr15	75869010	75873427	+	['ENST00000569423.5']	[]	ENST00000569423.5	Intron	protein_coding	24	chr15	75869010	75873427	+	[]	[]	ENST00000569423.5	Intron	protein_coding	24	chr15	75869010	75873427	+	ENST00000569423.5	Intron	protein_coding	24	chr15	75869010	75873427	+
Merged-chr15-76284946-1	chr15	76284909	76284983	+	0	{'ENST00000692691.1': 'exon', 'ENST00000687293.1': 'Intron', 'ENST00000557943.6': 'Intron', 'ENST00000685863.1': 'Intron'}	{'ENST00000692691.1': 'protein_coding', 'ENST00000687293.1': 'protein_coding', 'ENST00000557943.6': 'protein_coding', 'ENST00000685863.1': 'protein_coding'}	{'ENST00000692691.1': 18, 'ENST00000687293.1': 57, 'ENST00000557943.6': 74, 'ENST00000685863.1': 74}	{'ENST00000692691.1': 'chr15', 'ENST00000687293.1': 'chr15', 'ENST00000557943.6': 'chr15', 'ENST00000685863.1': 'chr15'}	{'ENST00000692691.1': 76284805.0, 'ENST00000687293.1': 76284927.0, 'ENST00000557943.6': 76283825.0, 'ENST00000685863.1': 76274494.0}	{'ENST00000692691.1': 76284927.0, 'ENST00000687293.1': 76285636.0, 'ENST00000557943.6': 76285636.0, 'ENST00000685863.1': 76285636.0}	{'ENST00000692691.1': '-', 'ENST00000687293.1': '-', 'ENST00000557943.6': '-', 'ENST00000685863.1': '-'}	ENST00000557943.6	Intron	protein_coding	74	chr15	76283825	76285636	-	['ENST00000692691.1', 'ENST00000687293.1', 'ENST00000557943.6', 'ENST00000685863.1']	['ENST00000557943.6']	ENST00000557943.6	Intron	protein_coding	74	chr15	76283825	76285636	-	[]	[]	ENST00000557943.6	Intron	protein_coding	74	chr15	76283825	76285636	-	ENST00000557943.6	Intron	protein_coding	74	chr15	76283825	76285636	-
Merged-chr15-77613671-1	chr15	77613634	77613708	-	0	{'ENST00000355300.7': '3UTR', 'ENST00000561030.5': '3UTR'}	{'ENST00000355300.7': 'protein_coding', 'ENST00000561030.5': 'protein_coding'}	{'ENST00000355300.7': 74, 'ENST00000561030.5': 39}	{'ENST00000355300.7': 'chr15', 'ENST00000561030.5': 'chr15'}	{'ENST00000355300.7': 77613027.0, 'ENST00000561030.5': 77613670.0}	{'ENST00000355300.7': 77614046.0, 'ENST00000561030.5': 77614046.0}	{'ENST00000355300.7': '-', 'ENST00000561030.5': '-'}	ENST00000355300.7	3UTR	protein_coding	74	chr15	77613027	77614046	-	['ENST00000355300.7', 'ENST00000561030.5']	['ENST00000355300.7']	ENST00000355300.7	3UTR	protein_coding	74	chr15	77613027	77614046	-	[]	['ENST00000355300.7', 'ENST00000561030.5']	ENST00000355300.7	3UTR	protein_coding	74	chr15	77613027	77614046	-	ENST00000355300.7	3UTR	protein_coding	74	chr15	77613027	77614046	-
Merged-chr15-84669738-1	chr15	84669701	84669775	-	0	{'ENST00000559729.5': '3UTR', 'ENST00000558134.5': '3UTR', 'ENST00000268220.12': '3UTR', 'ENST00000455959.7': '3UTR'}	{'ENST00000559729.5': 'protein_coding', 'ENST00000558134.5': 'protein_coding', 'ENST00000268220.12': 'protein_coding', 'ENST00000455959.7': 'protein_coding'}	{'ENST00000559729.5': 74, 'ENST00000558134.5': 74, 'ENST00000268220.12': 74, 'ENST00000455959.7': 74}	{'ENST00000559729.5': 'chr15', 'ENST00000558134.5': 'chr15', 'ENST00000268220.12': 'chr15', 'ENST00000455959.7': 'chr15'}	{'ENST00000559729.5': 84669538.0, 'ENST00000558134.5': 84669544.0, 'ENST00000268220.12': 84669544.0, 'ENST00000455959.7': 84669560.0}	{'ENST00000559729.5': 84670021.0, 'ENST00000558134.5': 84669945.0, 'ENST00000268220.12': 84670021.0, 'ENST00000455959.7': 84670021.0}	{'ENST00000559729.5': '-', 'ENST00000558134.5': '-', 'ENST00000268220.12': '-', 'ENST00000455959.7': '-'}	ENST00000455959.7	3UTR	protein_coding	74	chr15	84669560	84670021	-	['ENST00000559729.5', 'ENST00000558134.5', 'ENST00000268220.12', 'ENST00000455959.7']	['ENST00000268220.12']	ENST00000268220.12	3UTR	protein_coding	74	chr15	84669544	84670021	-	[]	['ENST00000559729.5', 'ENST00000558134.5', 'ENST00000268220.12', 'ENST00000455959.7']	ENST00000559729.5	3UTR	protein_coding	74	chr15	84669538	84670021	-	ENST00000268220.12	3UTR	protein_coding	74	chr15	84669544	84670021	-
Merged-chr2-189033770-1	chr2	189033733	189033807	-	0	{'ENST00000374866.9': '3UTR', 'ENST00000618828.1': '3UTR'}	{'ENST00000374866.9': 'protein_coding', 'ENST00000618828.1': 'protein_coding'}	{'ENST00000374866.9': 74, 'ENST00000618828.1': 74}	{'ENST00000374866.9': 'chr2', 'ENST00000618828.1': 'chr2'}	{'ENST00000374866.9': 189031898.0, 'ENST00000618828.1': 189031915.0}	{'ENST00000374866.9': 189034072.0, 'ENST00000618828.1': 189034072.0}	{'ENST00000374866.9': '-', 'ENST00000618828.1': '-'}	ENST00000618828.1	3UTR	protein_coding	74	chr2	189031915	189034072	-	['ENST00000374866.9', 'ENST00000618828.1']	['ENST00000374866.9']	ENST00000374866.9	3UTR	protein_coding	74	chr2	189031898	189034072	-	[]	['ENST00000374866.9', 'ENST00000618828.1']	ENST00000374866.9	3UTR	protein_coding	74	chr2	189031898	189034072	-	ENST00000374866.9	3UTR	protein_coding	74	chr2	189031898	189034072	-
Merged-chr2-10783873-1	chr2	10783836	10783910	-	0	{'ENST00000272238.9': '3UTR', 'ENST00000272227.8': '3UTR', 'ENST00000540494.5': '3UTR', 'ENST00000404824.2': '3UTR'}	{'ENST00000272238.9': 'protein_coding', 'ENST00000272227.8': 'protein_coding', 'ENST00000540494.5': 'protein_coding', 'ENST00000404824.2': 'protein_coding'}	{'ENST00000272238.9': 74, 'ENST00000272227.8': 74, 'ENST00000540494.5': 74, 'ENST00000404824.2': 50}	{'ENST00000272238.9': 'chr2', 'ENST00000272227.8': 'chr2', 'ENST00000540494.5': 'chr2', 'ENST00000404824.2': 'chr2'}	{'ENST00000272238.9': 10783261.0, 'ENST00000272227.8': 10783391.0, 'ENST00000540494.5': 10783393.0, 'ENST00000404824.2': 10783861.0}	{'ENST00000272238.9': 10785110.0, 'ENST00000272227.8': 10784260.0, 'ENST00000540494.5': 10784260.0, 'ENST00000404824.2': 10784260.0}	{'ENST00000272238.9': '+', 'ENST00000272227.8': '-', 'ENST00000540494.5': '-', 'ENST00000404824.2': '-'}	ENST00000540494.5	3UTR	protein_coding	74	chr2	10783393	10784260	-	['ENST00000272238.9', 'ENST00000272227.8', 'ENST00000540494.5', 'ENST00000404824.2']	['ENST00000272238.9', 'ENST00000272227.8']	ENST00000272238.9	3UTR	protein_coding	74	chr2	10783261	10785110	+	[]	['ENST00000272238.9', 'ENST00000272227.8', 'ENST00000540494.5', 'ENST00000404824.2']	ENST00000272238.9	3UTR	protein_coding	74	chr2	10783261	10785110	+	ENST00000272238.9	3UTR	protein_coding	74	chr2	10783261	10785110	+
Merged-chr2-25234222-1	chr2	25234185	25234259	-	0	{'ENST00000380746.8': '3UTR', 'ENST00000683760.1': '3UTR', 'ENST00000402667.1': '3UTR', 'ENST00000264709.7': '3UTR', 'ENST00000321117.10': '3UTR'}	{'ENST00000380746.8': 'protein_coding', 'ENST00000683760.1': 'protein_coding', 'ENST00000402667.1': 'protein_coding', 'ENST00000264709.7': 'protein_coding', 'ENST00000321117.10': 'protein_coding'}	{'ENST00000380746.8': 74, 'ENST00000683760.1': 74, 'ENST00000402667.1': 63, 'ENST00000264709.7': 74, 'ENST00000321117.10': 74}	{'ENST00000380746.8': 'chr2', 'ENST00000683760.1': 'chr2', 'ENST00000402667.1': 'chr2', 'ENST00000264709.7': 'chr2', 'ENST00000321117.10': 'chr2'}	{'ENST00000380746.8': 25232976.0, 'ENST00000683760.1': 25233015.0, 'ENST00000402667.1': 25234197.0, 'ENST00000264709.7': 25227855.0, 'ENST00000321117.10': 25227874.0}	{'ENST00000380746.8': 25234281.0, 'ENST00000683760.1': 25234281.0, 'ENST00000402667.1': 25234281.0, 'ENST00000264709.7': 25234281.0, 'ENST00000321117.10': 25234281.0}	{'ENST00000380746.8': '-', 'ENST00000683760.1': '-', 'ENST00000402667.1': '-', 'ENST00000264709.7': '-', 'ENST00000321117.10': '-'}	ENST00000683760.1	3UTR	protein_coding	74	chr2	25233015	25234281	-	['ENST00000380746.8', 'ENST00000683760.1', 'ENST00000402667.1', 'ENST00000264709.7', 'ENST00000321117.10']	['ENST00000321117.10']	ENST00000321117.10	3UTR	protein_coding	74	chr2	25227874	25234281	-	[]	['ENST00000380746.8', 'ENST00000683760.1', 'ENST00000402667.1', 'ENST00000264709.7', 'ENST00000321117.10']	ENST00000380746.8	3UTR	protein_coding	74	chr2	25232976	25234281	-	ENST00000321117.10	3UTR	protein_coding	74	chr2	25227874	25234281	-
Merged-chr15-93027932-1	chr15	93027895	93027969	+	0	{'ENST00000394196.9': '3UTR'}	{'ENST00000394196.9': 'protein_coding'}	{'ENST00000394196.9': 74}	{'ENST00000394196.9': 'chr15'}	{'ENST00000394196.9': 93024703.0}	{'ENST00000394196.9': 93027996.0}	{'ENST00000394196.9': '+'}	ENST00000394196.9	3UTR	protein_coding	74	chr15	93024703	93027996	+	['ENST00000394196.9']	['ENST00000394196.9']	ENST00000394196.9	3UTR	protein_coding	74	chr15	93024703	93027996	+	[]	['ENST00000394196.9']	ENST00000394196.9	3UTR	protein_coding	74	chr15	93024703	93027996	+	ENST00000394196.9	3UTR	protein_coding	74	chr15	93024703	93027996	+
Merged-chr15-96337661-1	chr15	96337624	96337698	+	0	{'ENST00000453270.2': '3UTR', 'ENST00000421109.6': '3UTR', 'ENST00000394166.8': '3UTR', 'ENST00000394171.6': '3UTR'}	{'ENST00000453270.2': 'protein_coding', 'ENST00000421109.6': 'protein_coding', 'ENST00000394166.8': 'protein_coding', 'ENST00000394171.6': 'protein_coding'}	{'ENST00000453270.2': 74, 'ENST00000421109.6': 74, 'ENST00000394166.8': 74, 'ENST00000394171.6': 74}	{'ENST00000453270.2': 'chr15', 'ENST00000421109.6': 'chr15', 'ENST00000394166.8': 'chr15', 'ENST00000394171.6': 'chr15'}	{'ENST00000453270.2': 96337620.0, 'ENST00000421109.6': 96337620.0, 'ENST00000394166.8': 96337620.0, 'ENST00000394171.6': 96337620.0}	{'ENST00000453270.2': 96337836.0, 'ENST00000421109.6': 96338618.0, 'ENST00000394166.8': 96340258.0, 'ENST00000394171.6': 96340263.0}	{'ENST00000453270.2': '+', 'ENST00000421109.6': '+', 'ENST00000394166.8': '+', 'ENST00000394171.6': '+'}	ENST00000453270.2	3UTR	protein_coding	74	chr15	96337620	96337836	+	['ENST00000453270.2', 'ENST00000421109.6', 'ENST00000394166.8', 'ENST00000394171.6']	['ENST00000394166.8']	ENST00000394166.8	3UTR	protein_coding	74	chr15	96337620	96340258	+	[]	['ENST00000453270.2', 'ENST00000421109.6', 'ENST00000394166.8', 'ENST00000394171.6']	ENST00000453270.2	3UTR	protein_coding	74	chr15	96337620	96337836	+	ENST00000394166.8	3UTR	protein_coding	74	chr15	96337620	96340258	+
Merged-chr15-96338330-1	chr15	96338293	96338367	+	0	{'ENST00000421109.6': '3UTR', 'ENST00000394166.8': '3UTR', 'ENST00000394171.6': '3UTR'}	{'ENST00000421109.6': 'protein_coding', 'ENST00000394166.8': 'protein_coding', 'ENST00000394171.6': 'protein_coding'}	{'ENST00000421109.6': 74, 'ENST00000394166.8': 74, 'ENST00000394171.6': 74}	{'ENST00000421109.6': 'chr15', 'ENST00000394166.8': 'chr15', 'ENST00000394171.6': 'chr15'}	{'ENST00000421109.6': 96337620.0, 'ENST00000394166.8': 96337620.0, 'ENST00000394171.6': 96337620.0}	{'ENST00000421109.6': 96338618.0, 'ENST00000394166.8': 96340258.0, 'ENST00000394171.6': 96340263.0}	{'ENST00000421109.6': '+', 'ENST00000394166.8': '+', 'ENST00000394171.6': '+'}	ENST00000421109.6	3UTR	protein_coding	74	chr15	96337620	96338618	+	['ENST00000421109.6', 'ENST00000394166.8', 'ENST00000394171.6']	['ENST00000394166.8']	ENST00000394166.8	3UTR	protein_coding	74	chr15	96337620	96340258	+	[]	['ENST00000421109.6', 'ENST00000394166.8', 'ENST00000394171.6']	ENST00000421109.6	3UTR	protein_coding	74	chr15	96337620	96338618	+	ENST00000394166.8	3UTR	protein_coding	74	chr15	96337620	96340258	+
Merged-chr2-12741253-1	chr2	12741216	12741290	+	0	{'ENST00000381465.2': '3UTR'}	{'ENST00000381465.2': 'protein_coding'}	{'ENST00000381465.2': 74}	{'ENST00000381465.2': 'chr2'}	{'ENST00000381465.2': 12740792.0}	{'ENST00000381465.2': 12742734.0}	{'ENST00000381465.2': '+'}	ENST00000381465.2	3UTR	protein_coding	74	chr2	12740792	12742734	+	['ENST00000381465.2']	[]	ENST00000381465.2	3UTR	protein_coding	74	chr2	12740792	12742734	+	[]	['ENST00000381465.2']	ENST00000381465.2	3UTR	protein_coding	74	chr2	12740792	12742734	+	ENST00000381465.2	3UTR	protein_coding	74	chr2	12740792	12742734	+
Merged-chr2-70087815-1	chr2	70087778	70087852	+	0	{'ENST00000303577.7': 'CDS', 'ENST00000625518.2': 'Intron'}	{'ENST00000303577.7': 'protein_coding', 'ENST00000625518.2': 'lncRNA'}	{'ENST00000303577.7': 74, 'ENST00000625518.2': 74}	{'ENST00000303577.7': 'chr2', 'ENST00000625518.2': 'chr2'}	{'ENST00000303577.7': 70087744.0, 'ENST00000625518.2': 70085624.0}	{'ENST00000303577.7': 70088811.0, 'ENST00000625518.2': 70088409.0}	{'ENST00000303577.7': '+', 'ENST00000625518.2': '-'}	ENST00000303577.7	CDS	protein_coding	74	chr2	70087744	70088811	+	['ENST00000303577.7', 'ENST00000625518.2']	['ENST00000303577.7']	ENST00000303577.7	CDS	protein_coding	74	chr2	70087744	70088811	+	[]	[]	ENST00000303577.7	CDS	protein_coding	74	chr2	70087744	70088811	+	ENST00000303577.7	CDS	protein_coding	74	chr2	70087744	70088811	+
Merged-chr2-134454585-1	chr2	134454548	134454622	+	0	{'ENST00000409645.5': '3UTR'}	{'ENST00000409645.5': 'protein_coding'}	{'ENST00000409645.5': 73}	{'ENST00000409645.5': 'chr2'}	{'ENST00000409645.5': 134448845.0}	{'ENST00000409645.5': 134454621.0}	{'ENST00000409645.5': '+'}	ENST00000409645.5	3UTR	protein_coding	73	chr2	134448845	134454621	+	['ENST00000409645.5']	[]	ENST00000409645.5	3UTR	protein_coding	73	chr2	134448845	134454621	+	[]	['ENST00000409645.5']	ENST00000409645.5	3UTR	protein_coding	73	chr2	134448845	134454621	+	ENST00000409645.5	3UTR	protein_coding	73	chr2	134448845	134454621	+
Merged-chr17-28326754-1	chr17	28326717	28326791	+	0	{'ENST00000583381.5': '3UTR', 'ENST00000226230.8': '3UTR', 'ENST00000336687.6': '3UTR'}	{'ENST00000583381.5': 'protein_coding', 'ENST00000226230.8': 'protein_coding', 'ENST00000336687.6': 'protein_coding'}	{'ENST00000583381.5': 1, 'ENST00000226230.8': 1, 'ENST00000336687.6': 1}	{'ENST00000583381.5': 'chr17', 'ENST00000226230.8': 'chr17', 'ENST00000336687.6': 'chr17'}	{'ENST00000583381.5': 28326791.0, 'ENST00000226230.8': 28326791.0, 'ENST00000336687.6': 28326791.0}	{'ENST00000583381.5': 28326875.0, 'ENST00000226230.8': 28328685.0, 'ENST00000336687.6': 28328225.0}	{'ENST00000583381.5': '+', 'ENST00000226230.8': '+', 'ENST00000336687.6': '+'}	ENST00000583381.5	3UTR	protein_coding	1	chr17	28326791	28326875	+	['ENST00000583381.5', 'ENST00000226230.8', 'ENST00000336687.6']	['ENST00000226230.8']	ENST00000226230.8	3UTR	protein_coding	1	chr17	28326791	28328685	+	[]	['ENST00000583381.5', 'ENST00000226230.8', 'ENST00000336687.6']	ENST00000583381.5	3UTR	protein_coding	1	chr17	28326791	28326875	+	ENST00000226230.8	3UTR	protein_coding	1	chr17	28326791	28328685	+
Merged-chr17-31851901-1	chr17	31851864	31851938	-	0	{'ENST00000378634.6': '3UTR'}	{'ENST00000378634.6': 'protein_coding'}	{'ENST00000378634.6': 68}	{'ENST00000378634.6': 'chr17'}	{'ENST00000378634.6': 31851871.0}	{'ENST00000378634.6': 31852141.0}	{'ENST00000378634.6': '-'}	ENST00000378634.6	3UTR	protein_coding	68	chr17	31851871	31852141	-	['ENST00000378634.6']	[]	ENST00000378634.6	3UTR	protein_coding	68	chr17	31851871	31852141	-	[]	['ENST00000378634.6']	ENST00000378634.6	3UTR	protein_coding	68	chr17	31851871	31852141	-	ENST00000378634.6	3UTR	protein_coding	68	chr17	31851871	31852141	-
Merged-chr17-42579514-1	chr17	42579477	42579551	-	0	{'ENST00000309428.10': 'exon'}	{'ENST00000309428.10': 'protein_coding'}	{'ENST00000309428.10': 37}	{'ENST00000309428.10': 'chr17'}	{'ENST00000309428.10': 42579515.0}	{'ENST00000309428.10': 42582270.0}	{'ENST00000309428.10': '-'}	ENST00000309428.10	exon	protein_coding	37	chr17	42579515	42582270	-	['ENST00000309428.10']	['ENST00000309428.10']	ENST00000309428.10	exon	protein_coding	37	chr17	42579515	42582270	-	[]	[]	ENST00000309428.10	exon	protein_coding	37	chr17	42579515	42582270	-	ENST00000309428.10	exon	protein_coding	37	chr17	42579515	42582270	-
Merged-chr4-113454273-1	chr4	113454236	113454310	-	0	{'ENST00000394524.7': '3UTR', 'ENST00000699373.1': '3UTR', 'ENST00000699048.1': 'exon', 'ENST00000706056.1': '3UTR', 'ENST00000699380.1': '3UTR', 'ENST00000699381.1': '3UTR', 'ENST00000699418.1': 'exon', 'ENST00000706057.1': '3UTR', 'ENST00000699382.1': '3UTR', 'ENST00000342666.9': 'exon'}	{'ENST00000394524.7': 'protein_coding', 'ENST00000699373.1': 'protein_coding', 'ENST00000699048.1': 'protein_coding', 'ENST00000706056.1': 'protein_coding', 'ENST00000699380.1': 'protein_coding', 'ENST00000699381.1': 'protein_coding', 'ENST00000699418.1': 'protein_coding', 'ENST00000706057.1': 'protein_coding', 'ENST00000699382.1': 'protein_coding', 'ENST00000342666.9': 'protein_coding'}	{'ENST00000394524.7': 74, 'ENST00000699373.1': 74, 'ENST00000699048.1': 74, 'ENST00000706056.1': 74, 'ENST00000699380.1': 74, 'ENST00000699381.1': 74, 'ENST00000699418.1': 74, 'ENST00000706057.1': 74, 'ENST00000699382.1': 74, 'ENST00000342666.9': 74}	{'ENST00000394524.7': 'chr4', 'ENST00000699373.1': 'chr4', 'ENST00000699048.1': 'chr4', 'ENST00000706056.1': 'chr4', 'ENST00000699380.1': 'chr4', 'ENST00000699381.1': 'chr4', 'ENST00000699418.1': 'chr4', 'ENST00000706057.1': 'chr4', 'ENST00000699382.1': 'chr4', 'ENST00000342666.9': 'chr4'}	{'ENST00000394524.7': 113451032.0, 'ENST00000699373.1': 113451045.0, 'ENST00000699048.1': 113451068.0, 'ENST00000706056.1': 113452439.0, 'ENST00000699380.1': 113452442.0, 'ENST00000699381.1': 113452451.0, 'ENST00000699418.1': 113452701.0, 'ENST00000706057.1': 113452803.0, 'ENST00000699382.1': 113454105.0, 'ENST00000342666.9': 113454105.0}	{'ENST00000394524.7': 113454514.0, 'ENST00000699373.1': 113454514.0, 'ENST00000699048.1': 113454515.0, 'ENST00000706056.1': 113454514.0, 'ENST00000699380.1': 113457333.0, 'ENST00000699381.1': 113455757.0, 'ENST00000699418.1': 113454515.0, 'ENST00000706057.1': 113454514.0, 'ENST00000699382.1': 113457333.0, 'ENST00000342666.9': 113454515.0}	{'ENST00000394524.7': '-', 'ENST00000699373.1': '-', 'ENST00000699048.1': '-', 'ENST00000706056.1': '-', 'ENST00000699380.1': '-', 'ENST00000699381.1': '-', 'ENST00000699418.1': '-', 'ENST00000706057.1': '-', 'ENST00000699382.1': '-', 'ENST00000342666.9': '-'}	ENST00000699382.1	3UTR	protein_coding	74	chr4	113454105	113457333	-	['ENST00000394524.7', 'ENST00000699373.1', 'ENST00000699048.1', 'ENST00000706056.1', 'ENST00000699380.1', 'ENST00000699381.1', 'ENST00000699418.1', 'ENST00000706057.1', 'ENST00000699382.1', 'ENST00000342666.9']	[]	ENST00000699382.1	3UTR	protein_coding	74	chr4	113454105	113457333	-	[]	['ENST00000394524.7', 'ENST00000699373.1', 'ENST00000706056.1', 'ENST00000699380.1', 'ENST00000699381.1', 'ENST00000706057.1', 'ENST00000699382.1']	ENST00000394524.7	3UTR	protein_coding	74	chr4	113451032	113454514	-	ENST00000699382.1	3UTR	protein_coding	74	chr4	113454105	113457333	-
Merged-chr17-59695105-1	chr17	59695068	59695142	+	0	{'ENST00000269122.8': '3UTR', 'ENST00000472651.6': '3UTR'}	{'ENST00000269122.8': 'protein_coding', 'ENST00000472651.6': 'protein_coding'}	{'ENST00000269122.8': 74, 'ENST00000472651.6': 3}	{'ENST00000269122.8': 'chr17', 'ENST00000472651.6': 'chr17'}	{'ENST00000269122.8': 59693850.0, 'ENST00000472651.6': 59693850.0}	{'ENST00000269122.8': 59696956.0, 'ENST00000472651.6': 59695071.0}	{'ENST00000269122.8': '+', 'ENST00000472651.6': '+'}	ENST00000269122.8	3UTR	protein_coding	74	chr17	59693850	59696956	+	['ENST00000269122.8', 'ENST00000472651.6']	['ENST00000269122.8']	ENST00000269122.8	3UTR	protein_coding	74	chr17	59693850	59696956	+	[]	['ENST00000269122.8', 'ENST00000472651.6']	ENST00000269122.8	3UTR	protein_coding	74	chr17	59693850	59696956	+	ENST00000269122.8	3UTR	protein_coding	74	chr17	59693850	59696956	+
Merged-chr17-75845721-1	chr17	75845684	75845758	-	0	{'ENST00000254806.8': '3UTR', 'ENST00000626827.2': '3UTR', 'ENST00000585462.5': '3UTR', 'ENST00000591399.5': '3UTR'}	{'ENST00000254806.8': 'protein_coding', 'ENST00000626827.2': 'protein_coding', 'ENST00000585462.5': 'protein_coding', 'ENST00000591399.5': 'protein_coding'}	{'ENST00000254806.8': 60, 'ENST00000626827.2': 60, 'ENST00000585462.5': 50, 'ENST00000591399.5': 39}	{'ENST00000254806.8': 'chr17', 'ENST00000626827.2': 'chr17', 'ENST00000585462.5': 'chr17', 'ENST00000591399.5': 'chr17'}	{'ENST00000254806.8': 75845699.0, 'ENST00000626827.2': 75845699.0, 'ENST00000585462.5': 75845709.0, 'ENST00000591399.5': 75845720.0}	{'ENST00000254806.8': 75846736.0, 'ENST00000626827.2': 75846749.0, 'ENST00000585462.5': 75846736.0, 'ENST00000591399.5': 75846736.0}	{'ENST00000254806.8': '-', 'ENST00000626827.2': '-', 'ENST00000585462.5': '-', 'ENST00000591399.5': '-'}	ENST00000254806.8	3UTR	protein_coding	60	chr17	75845699	75846736	-	['ENST00000254806.8', 'ENST00000626827.2', 'ENST00000585462.5', 'ENST00000591399.5']	['ENST00000254806.8']	ENST00000254806.8	3UTR	protein_coding	60	chr17	75845699	75846736	-	[]	['ENST00000254806.8', 'ENST00000626827.2', 'ENST00000585462.5', 'ENST00000591399.5']	ENST00000254806.8	3UTR	protein_coding	60	chr17	75845699	75846736	-	ENST00000254806.8	3UTR	protein_coding	60	chr17	75845699	75846736	-
Merged-chr4-674207-1	chr4	674170	674244	-	0	{'ENST00000506838.5': 'exon', 'ENST00000304312.5': 'Intron', 'ENST00000505477.5': 'Intron'}	{'ENST00000506838.5': 'protein_coding', 'ENST00000304312.5': 'protein_coding', 'ENST00000505477.5': 'protein_coding'}	{'ENST00000506838.5': 74, 'ENST00000304312.5': 41, 'ENST00000505477.5': 74}	{'ENST00000506838.5': 'chr4', 'ENST00000304312.5': 'chr4', 'ENST00000505477.5': 'chr4'}	{'ENST00000506838.5': 673580.0, 'ENST00000304312.5': 673966.0, 'ENST00000505477.5': 673977.0}	{'ENST00000506838.5': 675854.0, 'ENST00000304312.5': 674211.0, 'ENST00000505477.5': 678657.0}	{'ENST00000506838.5': '+', 'ENST00000304312.5': '-', 'ENST00000505477.5': '+'}	ENST00000505477.5	Intron	protein_coding	74	chr4	673977	678657	+	['ENST00000506838.5', 'ENST00000304312.5', 'ENST00000505477.5']	['ENST00000304312.5']	ENST00000304312.5	Intron	protein_coding	41	chr4	673966	674211	-	[]	[]	ENST00000304312.5	Intron	protein_coding	41	chr4	673966	674211	-	ENST00000304312.5	Intron	protein_coding	41	chr4	673966	674211	-
Merged-chr4-76559571-1	chr4	76559534	76559608	+	0	{'ENST00000296043.7': 'Intron'}	{'ENST00000296043.7': 'protein_coding'}	{'ENST00000296043.7': 74}	{'ENST00000296043.7': 'chr4'}	{'ENST00000296043.7': 76555763.0}	{'ENST00000296043.7': 76710155.0}	{'ENST00000296043.7': '+'}	ENST00000296043.7	Intron	protein_coding	74	chr4	76555763	76710155	+	['ENST00000296043.7']	['ENST00000296043.7']	ENST00000296043.7	Intron	protein_coding	74	chr4	76555763	76710155	+	[]	[]	ENST00000296043.7	Intron	protein_coding	74	chr4	76555763	76710155	+	ENST00000296043.7	Intron	protein_coding	74	chr4	76555763	76710155	+
Merged-chr4-82424628-1	chr4	82424591	82424665	-	0	{'ENST00000614627.4': 'exon', 'ENST00000295470.10': 'exon', 'ENST00000507721.5': '3UTR', 'ENST00000602300.5': 'exon', 'ENST00000630827.1': 'exon'}	{'ENST00000614627.4': 'protein_coding', 'ENST00000295470.10': 'protein_coding', 'ENST00000507721.5': 'protein_coding', 'ENST00000602300.5': 'protein_coding', 'ENST00000630827.1': 'protein_coding'}	{'ENST00000614627.4': 74, 'ENST00000295470.10': 74, 'ENST00000507721.5': 41, 'ENST00000602300.5': 37, 'ENST00000630827.1': 35}	{'ENST00000614627.4': 'chr4', 'ENST00000295470.10': 'chr4', 'ENST00000507721.5': 'chr4', 'ENST00000602300.5': 'chr4', 'ENST00000630827.1': 'chr4'}	{'ENST00000614627.4': 82422565.0, 'ENST00000295470.10': 82422569.0, 'ENST00000507721.5': 82424625.0, 'ENST00000602300.5': 82424629.0, 'ENST00000630827.1': 82424631.0}	{'ENST00000614627.4': 82424883.0, 'ENST00000295470.10': 82424883.0, 'ENST00000507721.5': 82426061.0, 'ENST00000602300.5': 82424883.0, 'ENST00000630827.1': 82424883.0}	{'ENST00000614627.4': '-', 'ENST00000295470.10': '-', 'ENST00000507721.5': '-', 'ENST00000602300.5': '-', 'ENST00000630827.1': '-'}	ENST00000295470.10	exon	protein_coding	74	chr4	82422569	82424883	-	['ENST00000614627.4', 'ENST00000295470.10', 'ENST00000507721.5', 'ENST00000602300.5', 'ENST00000630827.1']	['ENST00000295470.10']	ENST00000295470.10	exon	protein_coding	74	chr4	82422569	82424883	-	[]	['ENST00000507721.5']	ENST00000507721.5	3UTR	protein_coding	41	chr4	82424625	82426061	-	ENST00000295470.10	exon	protein_coding	74	chr4	82422569	82424883	-
Merged-chr4-108622208-1	chr4	108622171	108622245	+	0	{'ENST00000502534.5': 'Intron'}	{'ENST00000502534.5': 'protein_coding'}	{'ENST00000502534.5': 42}	{'ENST00000502534.5': 'chr4'}	{'ENST00000502534.5': 108622204.0}	{'ENST00000502534.5': 108622514.0}	{'ENST00000502534.5': '+'}	ENST00000502534.5	Intron	protein_coding	42	chr4	108622204	108622514	+	['ENST00000502534.5']	[]	ENST00000502534.5	Intron	protein_coding	42	chr4	108622204	108622514	+	[]	[]	ENST00000502534.5	Intron	protein_coding	42	chr4	108622204	108622514	+	ENST00000502534.5	Intron	protein_coding	42	chr4	108622204	108622514	+
Merged-chr4-119298488-1	chr4	119298451	119298525	-	0	{'ENST00000504110.2': 'exon'}	{'ENST00000504110.2': 'protein_coding'}	{'ENST00000504110.2': 74}	{'ENST00000504110.2': 'chr4'}	{'ENST00000504110.2': 119296419.0}	{'ENST00000504110.2': 119298779.0}	{'ENST00000504110.2': '-'}	ENST00000504110.2	exon	protein_coding	74	chr4	119296419	119298779	-	['ENST00000504110.2']	['ENST00000504110.2']	ENST00000504110.2	exon	protein_coding	74	chr4	119296419	119298779	-	[]	[]	ENST00000504110.2	exon	protein_coding	74	chr4	119296419	119298779	-	ENST00000504110.2	exon	protein_coding	74	chr4	119296419	119298779	-
Merged-chr17-82242678-1	chr17	82242641	82242715	-	0	{'ENST00000314028.11': '3UTR', 'ENST00000398519.9': 'Intron'}	{'ENST00000314028.11': 'protein_coding', 'ENST00000398519.9': 'protein_coding'}	{'ENST00000314028.11': 49, 'ENST00000398519.9': 74}	{'ENST00000314028.11': 'chr17', 'ENST00000398519.9': 'chr17'}	{'ENST00000314028.11': 82242667.0, 'ENST00000398519.9': 82240062.0}	{'ENST00000314028.11': 82244783.0, 'ENST00000398519.9': 82248874.0}	{'ENST00000314028.11': '-', 'ENST00000398519.9': '-'}	ENST00000398519.9	Intron	protein_coding	74	chr17	82240062	82248874	-	['ENST00000314028.11', 'ENST00000398519.9']	['ENST00000314028.11']	ENST00000314028.11	3UTR	protein_coding	49	chr17	82242667	82244783	-	[]	['ENST00000314028.11']	ENST00000314028.11	3UTR	protein_coding	49	chr17	82242667	82244783	-	ENST00000314028.11	3UTR	protein_coding	49	chr17	82242667	82244783	-
Merged-chr17-40457710-1	chr17	40457673	40457747	+	0	{'ENST00000269593.5': '3UTR'}	{'ENST00000269593.5': 'protein_coding'}	{'ENST00000269593.5': 52}	{'ENST00000269593.5': 'chr17'}	{'ENST00000269593.5': 40456581.0}	{'ENST00000269593.5': 40457725.0}	{'ENST00000269593.5': '+'}	ENST00000269593.5	3UTR	protein_coding	52	chr17	40456581	40457725	+	['ENST00000269593.5']	['ENST00000269593.5']	ENST00000269593.5	3UTR	protein_coding	52	chr17	40456581	40457725	+	[]	['ENST00000269593.5']	ENST00000269593.5	3UTR	protein_coding	52	chr17	40456581	40457725	+	ENST00000269593.5	3UTR	protein_coding	52	chr17	40456581	40457725	+
Merged-chr4-176320206-1	chr4	176320169	176320243	+	0	{'ENST00000512634.1': 'exon', 'ENST00000503362.2': 'Intron'}	{'ENST00000512634.1': 'lncRNA', 'ENST00000503362.2': 'protein_coding'}	{'ENST00000512634.1': 74, 'ENST00000503362.2': 25}	{'ENST00000512634.1': 'chr4', 'ENST00000503362.2': 'chr4'}	{'ENST00000512634.1': 176320145.0, 'ENST00000503362.2': 176320219.0}	{'ENST00000512634.1': 176320458.0, 'ENST00000503362.2': 176322169.0}	{'ENST00000512634.1': '-', 'ENST00000503362.2': '+'}	ENST00000512634.1	exon	lncRNA	74	chr4	176320145	176320458	-	['ENST00000512634.1', 'ENST00000503362.2']	['ENST00000503362.2']	ENST00000503362.2	Intron	protein_coding	25	chr4	176320219	176322169	+	[]	[]	ENST00000503362.2	Intron	protein_coding	25	chr4	176320219	176322169	+	ENST00000503362.2	Intron	protein_coding	25	chr4	176320219	176322169	+
Merged-chr4-6641119-1	chr4	6641082	6641156	+	0	{'ENST00000320912.8': 'CDS', 'ENST00000382581.5': 'exon'}	{'ENST00000320912.8': 'protein_coding', 'ENST00000382581.5': 'protein_coding'}	{'ENST00000320912.8': 74, 'ENST00000382581.5': 74}	{'ENST00000320912.8': 'chr4', 'ENST00000382581.5': 'chr4'}	{'ENST00000320912.8': 6640863.0, 'ENST00000382581.5': 6640685.0}	{'ENST00000320912.8': 6641243.0, 'ENST00000382581.5': 6641258.0}	{'ENST00000320912.8': '+', 'ENST00000382581.5': '+'}	ENST00000320912.8	CDS	protein_coding	74	chr4	6640863	6641243	+	['ENST00000320912.8', 'ENST00000382581.5']	['ENST00000382581.5']	ENST00000382581.5	exon	protein_coding	74	chr4	6640685	6641258	+	[]	[]	ENST00000382581.5	exon	protein_coding	74	chr4	6640685	6641258	+	ENST00000382581.5	exon	protein_coding	74	chr4	6640685	6641258	+
Merged-chr4-7033106-1	chr4	7033069	7033143	+	0	{'ENST00000448507.5': '3UTR', 'ENST00000409757.9': '3UTR', 'ENST00000446947.6': '3UTR', 'ENST00000500031.1': 'exon'}	{'ENST00000448507.5': 'protein_coding', 'ENST00000409757.9': 'protein_coding', 'ENST00000446947.6': 'protein_coding', 'ENST00000500031.1': 'lncRNA'}	{'ENST00000448507.5': 49, 'ENST00000409757.9': 45, 'ENST00000446947.6': 48, 'ENST00000500031.1': 74}	{'ENST00000448507.5': 'chr4', 'ENST00000409757.9': 'chr4', 'ENST00000446947.6': 'chr4', 'ENST00000500031.1': 'chr4'}	{'ENST00000448507.5': 7030390.0, 'ENST00000409757.9': 7030390.0, 'ENST00000446947.6': 7030390.0, 'ENST00000500031.1': 7030554.0}	{'ENST00000448507.5': 7033118.0, 'ENST00000409757.9': 7033114.0, 'ENST00000446947.6': 7033117.0, 'ENST00000500031.1': 7034053.0}	{'ENST00000448507.5': '+', 'ENST00000409757.9': '+', 'ENST00000446947.6': '+', 'ENST00000500031.1': '-'}	ENST00000500031.1	exon	lncRNA	74	chr4	7030554	7034053	-	['ENST00000448507.5', 'ENST00000409757.9', 'ENST00000446947.6', 'ENST00000500031.1']	['ENST00000409757.9']	ENST00000409757.9	3UTR	protein_coding	45	chr4	7030390	7033114	+	[]	['ENST00000448507.5', 'ENST00000409757.9', 'ENST00000446947.6']	ENST00000448507.5	3UTR	protein_coding	49	chr4	7030390	7033118	+	ENST00000409757.9	3UTR	protein_coding	45	chr4	7030390	7033114	+
Merged-chr4-8372358-1	chr4	8372321	8372395	-	0	{'ENST00000356406.10': 'Intron', 'ENST00000413009.6': 'Intron'}	{'ENST00000356406.10': 'protein_coding', 'ENST00000413009.6': 'protein_coding'}	{'ENST00000356406.10': 74, 'ENST00000413009.6': 74}	{'ENST00000356406.10': 'chr4', 'ENST00000413009.6': 'chr4'}	{'ENST00000356406.10': 8370994.0, 'ENST00000413009.6': 8370994.0}	{'ENST00000356406.10': 8373560.0, 'ENST00000413009.6': 8374977.0}	{'ENST00000356406.10': '-', 'ENST00000413009.6': '-'}	ENST00000356406.10	Intron	protein_coding	74	chr4	8370994	8373560	-	['ENST00000356406.10', 'ENST00000413009.6']	['ENST00000356406.10']	ENST00000356406.10	Intron	protein_coding	74	chr4	8370994	8373560	-	[]	[]	ENST00000356406.10	Intron	protein_coding	74	chr4	8370994	8373560	-	ENST00000356406.10	Intron	protein_coding	74	chr4	8370994	8373560	-
Merged-chr4-39498768-1	chr4	39498731	39498805	-	0	{'ENST00000316423.11': '3UTR', 'ENST00000501493.6': '3UTR', 'ENST00000506179.5': '3UTR'}	{'ENST00000316423.11': 'protein_coding', 'ENST00000501493.6': 'protein_coding', 'ENST00000506179.5': 'protein_coding'}	{'ENST00000316423.11': 51, 'ENST00000501493.6': 43, 'ENST00000506179.5': 18}	{'ENST00000316423.11': 'chr4', 'ENST00000501493.6': 'chr4', 'ENST00000506179.5': 'chr4'}	{'ENST00000316423.11': 39498755.0, 'ENST00000501493.6': 39498763.0, 'ENST00000506179.5': 39498788.0}	{'ENST00000316423.11': 39500145.0, 'ENST00000501493.6': 39500145.0, 'ENST00000506179.5': 39500145.0}	{'ENST00000316423.11': '-', 'ENST00000501493.6': '-', 'ENST00000506179.5': '-'}	ENST00000316423.11	3UTR	protein_coding	51	chr4	39498755	39500145	-	['ENST00000316423.11', 'ENST00000501493.6', 'ENST00000506179.5']	['ENST00000316423.11']	ENST00000316423.11	3UTR	protein_coding	51	chr4	39498755	39500145	-	[]	['ENST00000316423.11', 'ENST00000501493.6', 'ENST00000506179.5']	ENST00000316423.11	3UTR	protein_coding	51	chr4	39498755	39500145	-	ENST00000316423.11	3UTR	protein_coding	51	chr4	39498755	39500145	-
Merged-chr4-42087511-1	chr4	42087474	42087548	+	0	{'ENST00000264451.12': '3UTR'}	{'ENST00000264451.12': 'protein_coding'}	{'ENST00000264451.12': 74}	{'ENST00000264451.12': 'chr4'}	{'ENST00000264451.12': 42086124.0}	{'ENST00000264451.12': 42090461.0}	{'ENST00000264451.12': '+'}	ENST00000264451.12	3UTR	protein_coding	74	chr4	42086124	42090461	+	['ENST00000264451.12']	['ENST00000264451.12']	ENST00000264451.12	3UTR	protein_coding	74	chr4	42086124	42090461	+	[]	['ENST00000264451.12']	ENST00000264451.12	3UTR	protein_coding	74	chr4	42086124	42090461	+	ENST00000264451.12	3UTR	protein_coding	74	chr4	42086124	42090461	+
Merged-chr17-44559412-1	chr17	44559375	44559449	+	0	{'ENST00000315323.5': '3UTR'}	{'ENST00000315323.5': 'protein_coding'}	{'ENST00000315323.5': 66}	{'ENST00000315323.5': 'chr17'}	{'ENST00000315323.5': 44559384.0}	{'ENST00000315323.5': 44561262.0}	{'ENST00000315323.5': '+'}	ENST00000315323.5	3UTR	protein_coding	66	chr17	44559384	44561262	+	['ENST00000315323.5']	['ENST00000315323.5']	ENST00000315323.5	3UTR	protein_coding	66	chr17	44559384	44561262	+	[]	['ENST00000315323.5']	ENST00000315323.5	3UTR	protein_coding	66	chr17	44559384	44561262	+	ENST00000315323.5	3UTR	protein_coding	66	chr17	44559384	44561262	+
Merged-chr17-63594255-1	chr17	63594218	63594292	+	0	{'ENST00000614556.5': '3UTR', 'ENST00000691063.1': '3UTR', 'ENST00000688437.1': '3UTR', 'ENST00000615512.2': '3UTR', 'ENST00000690765.1': 'Intron'}	{'ENST00000614556.5': 'protein_coding', 'ENST00000691063.1': 'protein_coding', 'ENST00000688437.1': 'protein_coding', 'ENST00000615512.2': 'protein_coding', 'ENST00000690765.1': 'protein_coding'}	{'ENST00000614556.5': 48, 'ENST00000691063.1': 68, 'ENST00000688437.1': 20, 'ENST00000615512.2': 13, 'ENST00000690765.1': 74}	{'ENST00000614556.5': 'chr17', 'ENST00000691063.1': 'chr17', 'ENST00000688437.1': 'chr17', 'ENST00000615512.2': 'chr17', 'ENST00000690765.1': 'chr17'}	{'ENST00000614556.5': 63589170.0, 'ENST00000691063.1': 63594212.0, 'ENST00000688437.1': 63594247.0, 'ENST00000615512.2': 63594247.0, 'ENST00000690765.1': 63589237.0}	{'ENST00000614556.5': 63594266.0, 'ENST00000691063.1': 63594286.0, 'ENST00000688437.1': 63594266.0, 'ENST00000615512.2': 63594259.0, 'ENST00000690765.1': 63595966.0}	{'ENST00000614556.5': '+', 'ENST00000691063.1': '+', 'ENST00000688437.1': '+', 'ENST00000615512.2': '+', 'ENST00000690765.1': '+'}	ENST00000690765.1	Intron	protein_coding	74	chr17	63589237	63595966	+	['ENST00000614556.5', 'ENST00000691063.1', 'ENST00000688437.1', 'ENST00000615512.2', 'ENST00000690765.1']	['ENST00000614556.5']	ENST00000614556.5	3UTR	protein_coding	48	chr17	63589170	63594266	+	[]	['ENST00000614556.5', 'ENST00000691063.1', 'ENST00000688437.1', 'ENST00000615512.2']	ENST00000691063.1	3UTR	protein_coding	68	chr17	63594212	63594286	+	ENST00000614556.5	3UTR	protein_coding	48	chr17	63589170	63594266	+
Merged-chr4-78917948-1	chr4	78917911	78917985	-	0	{'ENST00000512733.5': '3UTR'}	{'ENST00000512733.5': 'protein_coding'}	{'ENST00000512733.5': 74}	{'ENST00000512733.5': 'chr4'}	{'ENST00000512733.5': 78911878.0}	{'ENST00000512733.5': 78920541.0}	{'ENST00000512733.5': '-'}	ENST00000512733.5	3UTR	protein_coding	74	chr4	78911878	78920541	-	['ENST00000512733.5']	['ENST00000512733.5']	ENST00000512733.5	3UTR	protein_coding	74	chr4	78911878	78920541	-	[]	['ENST00000512733.5']	ENST00000512733.5	3UTR	protein_coding	74	chr4	78911878	78920541	-	ENST00000512733.5	3UTR	protein_coding	74	chr4	78911878	78920541	-
Merged-chr4-82353343-1	chr4	82353306	82353380	-	0	{'ENST00000313899.12': 'exon'}	{'ENST00000313899.12': 'protein_coding'}	{'ENST00000313899.12': 74}	{'ENST00000313899.12': 'chr4'}	{'ENST00000313899.12': 82352498.0}	{'ENST00000313899.12': 82354154.0}	{'ENST00000313899.12': '-'}	ENST00000313899.12	exon	protein_coding	74	chr4	82352498	82354154	-	['ENST00000313899.12']	['ENST00000313899.12']	ENST00000313899.12	exon	protein_coding	74	chr4	82352498	82354154	-	[]	[]	ENST00000313899.12	exon	protein_coding	74	chr4	82352498	82354154	-	ENST00000313899.12	exon	protein_coding	74	chr4	82352498	82354154	-
Merged-chr17-81029156-1	chr17	81029119	81029193	-	0	{'ENST00000577066.2': 'exon'}	{'ENST00000577066.2': 'lncRNA'}	{'ENST00000577066.2': 64}	{'ENST00000577066.2': 'chr17'}	{'ENST00000577066.2': 81029130.0}	{'ENST00000577066.2': 81033398.0}	{'ENST00000577066.2': '-'}	ENST00000577066.2	exon	lncRNA	64	chr17	81029130	81033398	-	['ENST00000577066.2']	[]	ENST00000577066.2	exon	lncRNA	64	chr17	81029130	81033398	-	[]	[]	ENST00000577066.2	exon	lncRNA	64	chr17	81029130	81033398	-	ENST00000577066.2	exon	lncRNA	64	chr17	81029130	81033398	-
Merged-chr17-4798490-1	chr17	4798453	4798527	+	0	{'ENST00000614486.4': '3UTR', 'ENST00000270586.8': '3UTR'}	{'ENST00000614486.4': 'protein_coding', 'ENST00000270586.8': 'protein_coding'}	{'ENST00000614486.4': 49, 'ENST00000270586.8': 42}	{'ENST00000614486.4': 'chr17', 'ENST00000270586.8': 'chr17'}	{'ENST00000614486.4': 4798322.0, 'ENST00000270586.8': 4798420.0}	{'ENST00000614486.4': 4798502.0, 'ENST00000270586.8': 4798495.0}	{'ENST00000614486.4': '+', 'ENST00000270586.8': '+'}	ENST00000614486.4	3UTR	protein_coding	49	chr17	4798322	4798502	+	['ENST00000614486.4', 'ENST00000270586.8']	['ENST00000270586.8']	ENST00000270586.8	3UTR	protein_coding	42	chr17	4798420	4798495	+	[]	['ENST00000614486.4', 'ENST00000270586.8']	ENST00000614486.4	3UTR	protein_coding	49	chr17	4798322	4798502	+	ENST00000270586.8	3UTR	protein_coding	42	chr17	4798420	4798495	+
Merged-chr17-4937323-1	chr17	4937286	4937360	-	0	{'ENST00000225665.12': '3UTR'}	{'ENST00000225665.12': 'protein_coding'}	{'ENST00000225665.12': 74}	{'ENST00000225665.12': 'chr17'}	{'ENST00000225665.12': 4937130.0}	{'ENST00000225665.12': 4937743.0}	{'ENST00000225665.12': '-'}	ENST00000225665.12	3UTR	protein_coding	74	chr17	4937130	4937743	-	['ENST00000225665.12']	['ENST00000225665.12']	ENST00000225665.12	3UTR	protein_coding	74	chr17	4937130	4937743	-	[]	['ENST00000225665.12']	ENST00000225665.12	3UTR	protein_coding	74	chr17	4937130	4937743	-	ENST00000225665.12	3UTR	protein_coding	74	chr17	4937130	4937743	-
Merged-chr17-7571971-1	chr17	7571934	7572008	+	0	{'ENST00000321337.12': '3UTR', 'ENST00000614237.1': 'Intron'}	{'ENST00000321337.12': 'protein_coding', 'ENST00000614237.1': 'protein_coding'}	{'ENST00000321337.12': 35, 'ENST00000614237.1': 74}	{'ENST00000321337.12': 'chr17', 'ENST00000614237.1': 'chr17'}	{'ENST00000321337.12': 7571481.0, 'ENST00000614237.1': 7571479.0}	{'ENST00000321337.12': 7571969.0, 'ENST00000614237.1': 7572283.0}	{'ENST00000321337.12': '+', 'ENST00000614237.1': '+'}	ENST00000614237.1	Intron	protein_coding	74	chr17	7571479	7572283	+	['ENST00000321337.12', 'ENST00000614237.1']	['ENST00000321337.12']	ENST00000321337.12	3UTR	protein_coding	35	chr17	7571481	7571969	+	[]	['ENST00000321337.12']	ENST00000321337.12	3UTR	protein_coding	35	chr17	7571481	7571969	+	ENST00000321337.12	3UTR	protein_coding	35	chr17	7571481	7571969	+
Merged-chr17-7854371-1	chr17	7854334	7854408	+	0	{'ENST00000448097.7': '3UTR', 'ENST00000254846.9': 'exon'}	{'ENST00000448097.7': 'protein_coding', 'ENST00000254846.9': 'protein_coding'}	{'ENST00000448097.7': 74, 'ENST00000254846.9': 74}	{'ENST00000448097.7': 'chr17', 'ENST00000254846.9': 'chr17'}	{'ENST00000448097.7': 7853519.0, 'ENST00000254846.9': 7853210.0}	{'ENST00000448097.7': 7854796.0, 'ENST00000254846.9': 7854796.0}	{'ENST00000448097.7': '+', 'ENST00000254846.9': '+'}	ENST00000448097.7	3UTR	protein_coding	74	chr17	7853519	7854796	+	['ENST00000448097.7', 'ENST00000254846.9']	['ENST00000448097.7']	ENST00000448097.7	3UTR	protein_coding	74	chr17	7853519	7854796	+	[]	['ENST00000448097.7']	ENST00000448097.7	3UTR	protein_coding	74	chr17	7853519	7854796	+	ENST00000448097.7	3UTR	protein_coding	74	chr17	7853519	7854796	+
Merged-chr4-1982731-1	chr4	1982694	1982768	-	0	{'ENST00000542778.5': '3UTR', 'ENST00000382882.9': '3UTR'}	{'ENST00000542778.5': 'protein_coding', 'ENST00000382882.9': 'protein_coding'}	{'ENST00000542778.5': 52, 'ENST00000382882.9': 46}	{'ENST00000542778.5': 'chr4', 'ENST00000382882.9': 'chr4'}	{'ENST00000542778.5': 1982717.0, 'ENST00000382882.9': 1982723.0}	{'ENST00000542778.5': 1983321.0, 'ENST00000382882.9': 1983321.0}	{'ENST00000542778.5': '-', 'ENST00000382882.9': '-'}	ENST00000542778.5	3UTR	protein_coding	52	chr4	1982717	1983321	-	['ENST00000542778.5', 'ENST00000382882.9']	['ENST00000382882.9']	ENST00000382882.9	3UTR	protein_coding	46	chr4	1982723	1983321	-	[]	['ENST00000542778.5', 'ENST00000382882.9']	ENST00000542778.5	3UTR	protein_coding	52	chr4	1982717	1983321	-	ENST00000382882.9	3UTR	protein_coding	46	chr4	1982723	1983321	-
Merged-chr4-6707726-1	chr4	6707689	6707763	-	0	{'ENST00000320848.7': 'exon'}	{'ENST00000320848.7': 'protein_coding'}	{'ENST00000320848.7': 63}	{'ENST00000320848.7': 'chr4'}	{'ENST00000320848.7': 6707701.0}	{'ENST00000320848.7': 6708643.0}	{'ENST00000320848.7': '-'}	ENST00000320848.7	exon	protein_coding	63	chr4	6707701	6708643	-	['ENST00000320848.7']	['ENST00000320848.7']	ENST00000320848.7	exon	protein_coding	63	chr4	6707701	6708643	-	[]	[]	ENST00000320848.7	exon	protein_coding	63	chr4	6707701	6708643	-	ENST00000320848.7	exon	protein_coding	63	chr4	6707701	6708643	-
Merged-chr4-7763260-1	chr4	7763223	7763297	-	0	{'ENST00000674004.1': 'exon', 'ENST00000360265.9': '3UTR', 'ENST00000358461.6': '3UTR', 'ENST00000382543.4': '3UTR', 'ENST00000608442.2': 'Intron'}	{'ENST00000674004.1': 'lncRNA', 'ENST00000360265.9': 'protein_coding', 'ENST00000358461.6': 'protein_coding', 'ENST00000382543.4': 'protein_coding', 'ENST00000608442.2': 'lncRNA'}	{'ENST00000674004.1': 74, 'ENST00000360265.9': 74, 'ENST00000358461.6': 74, 'ENST00000382543.4': 74, 'ENST00000608442.2': 74}	{'ENST00000674004.1': 'chr4', 'ENST00000360265.9': 'chr4', 'ENST00000358461.6': 'chr4', 'ENST00000382543.4': 'chr4', 'ENST00000608442.2': 'chr4'}	{'ENST00000674004.1': 7759180.0, 'ENST00000360265.9': 7758714.0, 'ENST00000358461.6': 7758715.0, 'ENST00000382543.4': 7758928.0, 'ENST00000608442.2': 7754159.0}	{'ENST00000674004.1': 7764551.0, 'ENST00000360265.9': 7763767.0, 'ENST00000358461.6': 7763767.0, 'ENST00000382543.4': 7763767.0, 'ENST00000608442.2': 7772203.0}	{'ENST00000674004.1': '+', 'ENST00000360265.9': '-', 'ENST00000358461.6': '-', 'ENST00000382543.4': '-', 'ENST00000608442.2': '+'}	ENST00000674004.1	exon	lncRNA	74	chr4	7759180	7764551	+	['ENST00000674004.1', 'ENST00000360265.9', 'ENST00000358461.6', 'ENST00000382543.4', 'ENST00000608442.2']	[]	ENST00000674004.1	exon	lncRNA	74	chr4	7759180	7764551	+	[]	['ENST00000360265.9', 'ENST00000358461.6', 'ENST00000382543.4']	ENST00000360265.9	3UTR	protein_coding	74	chr4	7758714	7763767	-	ENST00000674004.1	exon	lncRNA	74	chr4	7759180	7764551	+
Merged-chr17-8173949-1	chr17	8173912	8173986	-	0	{'ENST00000437139.7': '3UTR', 'ENST00000449985.6': '3UTR', 'ENST00000532998.5': '3UTR'}	{'ENST00000437139.7': 'protein_coding', 'ENST00000449985.6': 'protein_coding', 'ENST00000532998.5': 'protein_coding'}	{'ENST00000437139.7': 74, 'ENST00000449985.6': 74, 'ENST00000532998.5': 74}	{'ENST00000437139.7': 'chr17', 'ENST00000449985.6': 'chr17', 'ENST00000532998.5': 'chr17'}	{'ENST00000437139.7': 8172457.0, 'ENST00000449985.6': 8173237.0, 'ENST00000532998.5': 8173742.0}	{'ENST00000437139.7': 8174205.0, 'ENST00000449985.6': 8174254.0, 'ENST00000532998.5': 8175691.0}	{'ENST00000437139.7': '-', 'ENST00000449985.6': '-', 'ENST00000532998.5': '-'}	ENST00000532998.5	3UTR	protein_coding	74	chr17	8173742	8175691	-	['ENST00000437139.7', 'ENST00000449985.6', 'ENST00000532998.5']	['ENST00000437139.7']	ENST00000437139.7	3UTR	protein_coding	74	chr17	8172457	8174205	-	[]	['ENST00000437139.7', 'ENST00000449985.6', 'ENST00000532998.5']	ENST00000437139.7	3UTR	protein_coding	74	chr17	8172457	8174205	-	ENST00000437139.7	3UTR	protein_coding	74	chr17	8172457	8174205	-
Merged-chr17-8509829-1	chr17	8509792	8509866	-	0	{'ENST00000379980.8': 'Intron'}	{'ENST00000379980.8': 'protein_coding'}	{'ENST00000379980.8': 19}	{'ENST00000379980.8': 'chr17'}	{'ENST00000379980.8': 8508677.0}	{'ENST00000379980.8': 8509811.0}	{'ENST00000379980.8': '-'}	ENST00000379980.8	Intron	protein_coding	19	chr17	8508677	8509811	-	['ENST00000379980.8']	[]	ENST00000379980.8	Intron	protein_coding	19	chr17	8508677	8509811	-	[]	[]	ENST00000379980.8	Intron	protein_coding	19	chr17	8508677	8509811	-	ENST00000379980.8	Intron	protein_coding	19	chr17	8508677	8509811	-
Merged-chr17-28614487-1	chr17	28614450	28614524	-	0	{'ENST00000528896.7': '3UTR', 'ENST00000424210.1': 'Intron', 'ENST00000670419.1': 'Intron'}	{'ENST00000528896.7': 'protein_coding', 'ENST00000424210.1': 'lncRNA', 'ENST00000670419.1': 'lncRNA'}	{'ENST00000528896.7': 74, 'ENST00000424210.1': 74, 'ENST00000670419.1': 74}	{'ENST00000528896.7': 'chr17', 'ENST00000424210.1': 'chr17', 'ENST00000670419.1': 'chr17'}	{'ENST00000528896.7': 28614446.0, 'ENST00000424210.1': 28612552.0, 'ENST00000670419.1': 28606460.0}	{'ENST00000528896.7': 28615066.0, 'ENST00000424210.1': 28616284.0, 'ENST00000670419.1': 28616284.0}	{'ENST00000528896.7': '-', 'ENST00000424210.1': '+', 'ENST00000670419.1': '+'}	ENST00000528896.7	3UTR	protein_coding	74	chr17	28614446	28615066	-	['ENST00000528896.7', 'ENST00000424210.1', 'ENST00000670419.1']	['ENST00000528896.7']	ENST00000528896.7	3UTR	protein_coding	74	chr17	28614446	28615066	-	[]	['ENST00000528896.7']	ENST00000528896.7	3UTR	protein_coding	74	chr17	28614446	28615066	-	ENST00000528896.7	3UTR	protein_coding	74	chr17	28614446	28615066	-
Merged-chr17-28614729-1	chr17	28614692	28614766	-	0	{'ENST00000528896.7': '3UTR', 'ENST00000424210.1': 'Intron', 'ENST00000670419.1': 'Intron'}	{'ENST00000528896.7': 'protein_coding', 'ENST00000424210.1': 'lncRNA', 'ENST00000670419.1': 'lncRNA'}	{'ENST00000528896.7': 74, 'ENST00000424210.1': 74, 'ENST00000670419.1': 74}	{'ENST00000528896.7': 'chr17', 'ENST00000424210.1': 'chr17', 'ENST00000670419.1': 'chr17'}	{'ENST00000528896.7': 28614446.0, 'ENST00000424210.1': 28612552.0, 'ENST00000670419.1': 28606460.0}	{'ENST00000528896.7': 28615066.0, 'ENST00000424210.1': 28616284.0, 'ENST00000670419.1': 28616284.0}	{'ENST00000528896.7': '-', 'ENST00000424210.1': '+', 'ENST00000670419.1': '+'}	ENST00000528896.7	3UTR	protein_coding	74	chr17	28614446	28615066	-	['ENST00000528896.7', 'ENST00000424210.1', 'ENST00000670419.1']	['ENST00000528896.7']	ENST00000528896.7	3UTR	protein_coding	74	chr17	28614446	28615066	-	[]	['ENST00000528896.7']	ENST00000528896.7	3UTR	protein_coding	74	chr17	28614446	28615066	-	ENST00000528896.7	3UTR	protein_coding	74	chr17	28614446	28615066	-
Merged-chr4-52714117-1	chr4	52714080	52714154	+	0	{'ENST00000441504.2': 'exon', 'ENST00000675705.1': 'Intron', 'ENST00000444958.2': 'Intron', 'ENST00000675988.1': 'Intron', 'ENST00000651729.1': 'Intron', 'ENST00000650700.1': 'Intron'}	{'ENST00000441504.2': 'lncRNA', 'ENST00000675705.1': 'lncRNA', 'ENST00000444958.2': 'lncRNA', 'ENST00000675988.1': 'lncRNA', 'ENST00000651729.1': 'lncRNA', 'ENST00000650700.1': 'lncRNA'}	{'ENST00000441504.2': 74, 'ENST00000675705.1': 74, 'ENST00000444958.2': 74, 'ENST00000675988.1': 74, 'ENST00000651729.1': 74, 'ENST00000650700.1': 74}	{'ENST00000441504.2': 'chr4', 'ENST00000675705.1': 'chr4', 'ENST00000444958.2': 'chr4', 'ENST00000675988.1': 'chr4', 'ENST00000651729.1': 'chr4', 'ENST00000650700.1': 'chr4'}	{'ENST00000441504.2': 52712824.0, 'ENST00000675705.1': 52712959.0, 'ENST00000444958.2': 52713542.0, 'ENST00000675988.1': 52713702.0, 'ENST00000651729.1': 52713206.0, 'ENST00000650700.1': 52712959.0}	{'ENST00000441504.2': 52718765.0, 'ENST00000675705.1': 52719867.0, 'ENST00000444958.2': 52714198.0, 'ENST00000675988.1': 52714198.0, 'ENST00000651729.1': 52722315.0, 'ENST00000650700.1': 52759377.0}	{'ENST00000441504.2': '+', 'ENST00000675705.1': '+', 'ENST00000444958.2': '+', 'ENST00000675988.1': '+', 'ENST00000651729.1': '-', 'ENST00000650700.1': '+'}	ENST00000675988.1	Intron	lncRNA	74	chr4	52713702	52714198	+	['ENST00000441504.2', 'ENST00000675705.1', 'ENST00000444958.2', 'ENST00000675988.1', 'ENST00000651729.1', 'ENST00000650700.1']	[]	ENST00000675988.1	Intron	lncRNA	74	chr4	52713702	52714198	+	[]	[]	ENST00000675988.1	Intron	lncRNA	74	chr4	52713702	52714198	+	ENST00000675988.1	Intron	lncRNA	74	chr4	52713702	52714198	+
Merged-chr4-56460876-1	chr4	56460839	56460913	+	0	{'ENST00000514888.5': '3UTR', 'ENST00000264221.6': '3UTR', 'ENST00000512576.3': '3UTR'}	{'ENST00000514888.5': 'protein_coding', 'ENST00000264221.6': 'protein_coding', 'ENST00000512576.3': 'protein_coding'}	{'ENST00000514888.5': 74, 'ENST00000264221.6': 74, 'ENST00000512576.3': 74}	{'ENST00000514888.5': 'chr4', 'ENST00000264221.6': 'chr4', 'ENST00000512576.3': 'chr4'}	{'ENST00000514888.5': 56459536.0, 'ENST00000264221.6': 56459536.0, 'ENST00000512576.3': 56459536.0}	{'ENST00000514888.5': 56461361.0, 'ENST00000264221.6': 56461368.0, 'ENST00000512576.3': 56464578.0}	{'ENST00000514888.5': '+', 'ENST00000264221.6': '+', 'ENST00000512576.3': '+'}	ENST00000514888.5	3UTR	protein_coding	74	chr4	56459536	56461361	+	['ENST00000514888.5', 'ENST00000264221.6', 'ENST00000512576.3']	['ENST00000512576.3']	ENST00000512576.3	3UTR	protein_coding	74	chr4	56459536	56464578	+	[]	['ENST00000514888.5', 'ENST00000264221.6', 'ENST00000512576.3']	ENST00000514888.5	3UTR	protein_coding	74	chr4	56459536	56461361	+	ENST00000512576.3	3UTR	protein_coding	74	chr4	56459536	56464578	+
Merged-chr4-75643220-1	chr4	75643183	75643257	-	0	{'ENST00000677171.1': '3UTR', 'ENST00000395719.7': '3UTR', 'ENST00000359707.9': '3UTR', 'ENST00000677060.1': '3UTR', 'ENST00000677201.1': '3UTR', 'ENST00000677952.1': '3UTR'}	{'ENST00000677171.1': 'protein_coding', 'ENST00000395719.7': 'protein_coding', 'ENST00000359707.9': 'protein_coding', 'ENST00000677060.1': 'protein_coding', 'ENST00000677201.1': 'protein_coding', 'ENST00000677952.1': 'protein_coding'}	{'ENST00000677171.1': 74, 'ENST00000395719.7': 74, 'ENST00000359707.9': 74, 'ENST00000677060.1': 74, 'ENST00000677201.1': 74, 'ENST00000677952.1': 74}	{'ENST00000677171.1': 'chr4', 'ENST00000395719.7': 'chr4', 'ENST00000359707.9': 'chr4', 'ENST00000677060.1': 'chr4', 'ENST00000677201.1': 'chr4', 'ENST00000677952.1': 'chr4'}	{'ENST00000677171.1': 75641849.0, 'ENST00000395719.7': 75642782.0, 'ENST00000359707.9': 75642786.0, 'ENST00000677060.1': 75642795.0, 'ENST00000677201.1': 75642808.0, 'ENST00000677952.1': 75642829.0}	{'ENST00000677171.1': 75645432.0, 'ENST00000395719.7': 75645432.0, 'ENST00000359707.9': 75645432.0, 'ENST00000677060.1': 75645616.0, 'ENST00000677201.1': 75645432.0, 'ENST00000677952.1': 75645616.0}	{'ENST00000677171.1': '-', 'ENST00000395719.7': '-', 'ENST00000359707.9': '-', 'ENST00000677060.1': '-', 'ENST00000677201.1': '-', 'ENST00000677952.1': '-'}	ENST00000677952.1	3UTR	protein_coding	74	chr4	75642829	75645616	-	['ENST00000677171.1', 'ENST00000395719.7', 'ENST00000359707.9', 'ENST00000677060.1', 'ENST00000677201.1', 'ENST00000677952.1']	['ENST00000359707.9']	ENST00000359707.9	3UTR	protein_coding	74	chr4	75642786	75645432	-	[]	['ENST00000677171.1', 'ENST00000395719.7', 'ENST00000359707.9', 'ENST00000677060.1', 'ENST00000677201.1', 'ENST00000677952.1']	ENST00000677171.1	3UTR	protein_coding	74	chr4	75641849	75645432	-	ENST00000359707.9	3UTR	protein_coding	74	chr4	75642786	75645432	-
Merged-chr4-99559307-1	chr4	99559270	99559344	-	0	{'ENST00000394877.7': 'AltUTR', 'ENST00000394876.7': 'AltUTR'}	{'ENST00000394877.7': 'protein_coding', 'ENST00000394876.7': 'protein_coding'}	{'ENST00000394877.7': 6, 'ENST00000394876.7': 6}	{'ENST00000394877.7': 'chr4', 'ENST00000394876.7': 'chr4'}	{'ENST00000394877.7': 99559339.0, 'ENST00000394876.7': 99559339.0}	{'ENST00000394877.7': 99559350.0, 'ENST00000394876.7': 99559361.0}	{'ENST00000394877.7': '-', 'ENST00000394876.7': '-'}	ENST00000394877.7	AltUTR	protein_coding	6	chr4	99559339	99559350	-	['ENST00000394877.7', 'ENST00000394876.7']	['ENST00000394876.7']	ENST00000394876.7	AltUTR	protein_coding	6	chr4	99559339	99559361	-	[]	[]	ENST00000394876.7	AltUTR	protein_coding	6	chr4	99559339	99559361	-	ENST00000394876.7	AltUTR	protein_coding	6	chr4	99559339	99559361	-
Merged-chr4-1935181-1	chr4	1935144	1935218	+	0	{'ENST00000508803.6': 'exon'}	{'ENST00000508803.6': 'protein_coding'}	{'ENST00000508803.6': 74}	{'ENST00000508803.6': 'chr4'}	{'ENST00000508803.6': 1935144.0}	{'ENST00000508803.6': 1935262.0}	{'ENST00000508803.6': '+'}	ENST00000508803.6	exon	protein_coding	74	chr4	1935144	1935262	+	['ENST00000508803.6']	['ENST00000508803.6']	ENST00000508803.6	exon	protein_coding	74	chr4	1935144	1935262	+	[]	[]	ENST00000508803.6	exon	protein_coding	74	chr4	1935144	1935262	+	ENST00000508803.6	exon	protein_coding	74	chr4	1935144	1935262	+
Merged-chr4-15686595-1	chr4	15686558	15686632	+	0	{'ENST00000504137.1': 'AltUTR', 'ENST00000422728.3': 'exon', 'ENST00000505260.5': 'Intron', 'ENST00000504598.5': 'Intron'}	{'ENST00000504137.1': 'protein_coding', 'ENST00000422728.3': 'protein_coding', 'ENST00000505260.5': 'protein_coding', 'ENST00000504598.5': 'lncRNA'}	{'ENST00000504137.1': 74, 'ENST00000422728.3': 74, 'ENST00000505260.5': 74, 'ENST00000504598.5': 74}	{'ENST00000504137.1': 'chr4', 'ENST00000422728.3': 'chr4', 'ENST00000505260.5': 'chr4', 'ENST00000504598.5': 'chr4'}	{'ENST00000504137.1': 15686236.0, 'ENST00000422728.3': 15686236.0, 'ENST00000505260.5': 15686462.0, 'ENST00000504598.5': 15686462.0}	{'ENST00000504137.1': 15686977.0, 'ENST00000422728.3': 15690447.0, 'ENST00000505260.5': 15686931.0, 'ENST00000504598.5': 15687000.0}	{'ENST00000504137.1': '+', 'ENST00000422728.3': '+', 'ENST00000505260.5': '+', 'ENST00000504598.5': '+'}	ENST00000505260.5	Intron	protein_coding	74	chr4	15686462	15686931	+	['ENST00000504137.1', 'ENST00000422728.3', 'ENST00000505260.5', 'ENST00000504598.5']	['ENST00000422728.3']	ENST00000422728.3	exon	protein_coding	74	chr4	15686236	15690447	+	[]	[]	ENST00000422728.3	exon	protein_coding	74	chr4	15686236	15690447	+	ENST00000422728.3	exon	protein_coding	74	chr4	15686236	15690447	+
Merged-chr17-67854557-1	chr17	67854520	67854594	+	0	{'ENST00000306378.11': 'exon'}	{'ENST00000306378.11': 'protein_coding'}	{'ENST00000306378.11': 74}	{'ENST00000306378.11': 'chr17'}	{'ENST00000306378.11': 67853940.0}	{'ENST00000306378.11': 67854762.0}	{'ENST00000306378.11': '+'}	ENST00000306378.11	exon	protein_coding	74	chr17	67853940	67854762	+	['ENST00000306378.11']	['ENST00000306378.11']	ENST00000306378.11	exon	protein_coding	74	chr17	67853940	67854762	+	[]	[]	ENST00000306378.11	exon	protein_coding	74	chr17	67853940	67854762	+	ENST00000306378.11	exon	protein_coding	74	chr17	67853940	67854762	+
Merged-chr4-20620536-1	chr4	20620499	20620573	+	0	{'ENST00000504154.6': '3UTR', 'ENST00000622093.4': '3UTR'}	{'ENST00000504154.6': 'protein_coding', 'ENST00000622093.4': 'protein_coding'}	{'ENST00000504154.6': 62, 'ENST00000622093.4': 60}	{'ENST00000504154.6': 'chr4', 'ENST00000622093.4': 'chr4'}	{'ENST00000504154.6': 20619007.0, 'ENST00000622093.4': 20619007.0}	{'ENST00000504154.6': 20620561.0, 'ENST00000622093.4': 20620559.0}	{'ENST00000504154.6': '+', 'ENST00000622093.4': '+'}	ENST00000504154.6	3UTR	protein_coding	62	chr4	20619007	20620561	+	['ENST00000504154.6', 'ENST00000622093.4']	['ENST00000504154.6']	ENST00000504154.6	3UTR	protein_coding	62	chr4	20619007	20620561	+	[]	['ENST00000504154.6', 'ENST00000622093.4']	ENST00000504154.6	3UTR	protein_coding	62	chr4	20619007	20620561	+	ENST00000504154.6	3UTR	protein_coding	62	chr4	20619007	20620561	+
Merged-chr4-26434916-1	chr4	26434879	26434953	+	0	{'ENST00000355476.8': '3UTR', 'ENST00000342320.8': '3UTR'}	{'ENST00000355476.8': 'protein_coding', 'ENST00000342320.8': 'protein_coding'}	{'ENST00000355476.8': 44, 'ENST00000342320.8': 74}	{'ENST00000355476.8': 'chr4', 'ENST00000342320.8': 'chr4'}	{'ENST00000355476.8': 26431005.0, 'ENST00000342320.8': 26431005.0}	{'ENST00000355476.8': 26434923.0, 'ENST00000342320.8': 26435131.0}	{'ENST00000355476.8': '+', 'ENST00000342320.8': '+'}	ENST00000342320.8	3UTR	protein_coding	74	chr4	26431005	26435131	+	['ENST00000355476.8', 'ENST00000342320.8']	['ENST00000355476.8']	ENST00000355476.8	3UTR	protein_coding	44	chr4	26431005	26434923	+	[]	['ENST00000355476.8', 'ENST00000342320.8']	ENST00000342320.8	3UTR	protein_coding	74	chr4	26431005	26435131	+	ENST00000355476.8	3UTR	protein_coding	44	chr4	26431005	26434923	+
Merged-chr4-56501795-1	chr4	56501758	56501832	+	0	{'ENST00000510663.6': 'CDS', 'ENST00000642900.1': 'exon'}	{'ENST00000510663.6': 'protein_coding', 'ENST00000642900.1': 'protein_coding'}	{'ENST00000510663.6': 74, 'ENST00000642900.1': 74}	{'ENST00000510663.6': 'chr4', 'ENST00000642900.1': 'chr4'}	{'ENST00000510663.6': 56501684.0, 'ENST00000642900.1': 56501684.0}	{'ENST00000510663.6': 56501858.0, 'ENST00000642900.1': 56503681.0}	{'ENST00000510663.6': '+', 'ENST00000642900.1': '+'}	ENST00000510663.6	CDS	protein_coding	74	chr4	56501684	56501858	+	['ENST00000510663.6', 'ENST00000642900.1']	['ENST00000642900.1']	ENST00000642900.1	exon	protein_coding	74	chr4	56501684	56503681	+	[]	[]	ENST00000642900.1	exon	protein_coding	74	chr4	56501684	56503681	+	ENST00000642900.1	exon	protein_coding	74	chr4	56501684	56503681	+
Merged-chr11-86808620-1	chr11	86808583	86808657	+	0	{'ENST00000280258.6': 'CDS', 'ENST00000533902.2': 'Intron'}	{'ENST00000280258.6': 'protein_coding', 'ENST00000533902.2': 'protein_coding'}	{'ENST00000280258.6': 74, 'ENST00000533902.2': 74}	{'ENST00000280258.6': 'chr11', 'ENST00000533902.2': 'chr11'}	{'ENST00000280258.6': 86807644.0, 'ENST00000533902.2': 86800651.0}	{'ENST00000280258.6': 86808792.0, 'ENST00000533902.2': 86823376.0}	{'ENST00000280258.6': '+', 'ENST00000533902.2': '+'}	ENST00000280258.6	CDS	protein_coding	74	chr11	86807644	86808792	+	['ENST00000280258.6', 'ENST00000533902.2']	['ENST00000280258.6']	ENST00000280258.6	CDS	protein_coding	74	chr11	86807644	86808792	+	[]	[]	ENST00000280258.6	CDS	protein_coding	74	chr11	86807644	86808792	+	ENST00000280258.6	CDS	protein_coding	74	chr11	86807644	86808792	+
Merged-chr11-116921994-1	chr11	116921957	116922031	-	0	{'ENST00000445177.6': 'Intron'}	{'ENST00000445177.6': 'protein_coding'}	{'ENST00000445177.6': 74}	{'ENST00000445177.6': 'chr11'}	{'ENST00000445177.6': 116897317.0}	{'ENST00000445177.6': 116927218.0}	{'ENST00000445177.6': '-'}	ENST00000445177.6	Intron	protein_coding	74	chr11	116897317	116927218	-	['ENST00000445177.6']	['ENST00000445177.6']	ENST00000445177.6	Intron	protein_coding	74	chr11	116897317	116927218	-	[]	[]	ENST00000445177.6	Intron	protein_coding	74	chr11	116897317	116927218	-	ENST00000445177.6	Intron	protein_coding	74	chr11	116897317	116927218	-
Merged-chr17-73283643-1	chr17	73283606	73283680	-	0	{'ENST00000335793.4': 'exon', 'ENST00000439510.2': 'exon'}	{'ENST00000335793.4': 'protein_coding', 'ENST00000439510.2': 'protein_coding'}	{'ENST00000335793.4': 57, 'ENST00000439510.2': 56}	{'ENST00000335793.4': 'chr17', 'ENST00000439510.2': 'chr17'}	{'ENST00000335793.4': 73283624.0, 'ENST00000439510.2': 73283625.0}	{'ENST00000335793.4': 73286612.0, 'ENST00000439510.2': 73286122.0}	{'ENST00000335793.4': '-', 'ENST00000439510.2': '-'}	ENST00000335793.4	exon	protein_coding	57	chr17	73283624	73286612	-	['ENST00000335793.4', 'ENST00000439510.2']	['ENST00000335793.4']	ENST00000335793.4	exon	protein_coding	57	chr17	73283624	73286612	-	[]	[]	ENST00000335793.4	exon	protein_coding	57	chr17	73283624	73286612	-	ENST00000335793.4	exon	protein_coding	57	chr17	73283624	73286612	-
Merged-chr17-74862543-1	chr17	74862506	74862580	-	0	{'ENST00000293195.10': '3UTR', 'ENST00000544854.5': '3UTR', 'ENST00000581530.5': '3UTR', 'ENST00000583917.5': '3UTR', 'ENST00000442102.6': '3UTR', 'ENST00000582944.5': '3UTR'}	{'ENST00000293195.10': 'protein_coding', 'ENST00000544854.5': 'protein_coding', 'ENST00000581530.5': 'protein_coding', 'ENST00000583917.5': 'protein_coding', 'ENST00000442102.6': 'protein_coding', 'ENST00000582944.5': 'protein_coding'}	{'ENST00000293195.10': 74, 'ENST00000544854.5': 74, 'ENST00000581530.5': 74, 'ENST00000583917.5': 63, 'ENST00000442102.6': 39, 'ENST00000582944.5': 37}	{'ENST00000293195.10': 'chr17', 'ENST00000544854.5': 'chr17', 'ENST00000581530.5': 'chr17', 'ENST00000583917.5': 'chr17', 'ENST00000442102.6': 'chr17', 'ENST00000582944.5': 'chr17'}	{'ENST00000293195.10': 74862497.0, 'ENST00000544854.5': 74862498.0, 'ENST00000581530.5': 74862501.0, 'ENST00000583917.5': 74862518.0, 'ENST00000442102.6': 74862542.0, 'ENST00000582944.5': 74862544.0}	{'ENST00000293195.10': 74862819.0, 'ENST00000544854.5': 74862819.0, 'ENST00000581530.5': 74862819.0, 'ENST00000583917.5': 74862819.0, 'ENST00000442102.6': 74862819.0, 'ENST00000582944.5': 74862819.0}	{'ENST00000293195.10': '-', 'ENST00000544854.5': '-', 'ENST00000581530.5': '-', 'ENST00000583917.5': '-', 'ENST00000442102.6': '-', 'ENST00000582944.5': '-'}	ENST00000581530.5	3UTR	protein_coding	74	chr17	74862501	74862819	-	['ENST00000293195.10', 'ENST00000544854.5', 'ENST00000581530.5', 'ENST00000583917.5', 'ENST00000442102.6', 'ENST00000582944.5']	['ENST00000293195.10']	ENST00000293195.10	3UTR	protein_coding	74	chr17	74862497	74862819	-	[]	['ENST00000293195.10', 'ENST00000544854.5', 'ENST00000581530.5', 'ENST00000583917.5', 'ENST00000442102.6', 'ENST00000582944.5']	ENST00000293195.10	3UTR	protein_coding	74	chr17	74862497	74862819	-	ENST00000293195.10	3UTR	protein_coding	74	chr17	74862497	74862819	-
Merged-chr17-81681195-1	chr17	81681158	81681232	-	0	{'ENST00000622299.5': '3UTR', 'ENST00000573392.5': '3UTR'}	{'ENST00000622299.5': 'protein_coding', 'ENST00000573392.5': 'protein_coding'}	{'ENST00000622299.5': 46, 'ENST00000573392.5': 32}	{'ENST00000622299.5': 'chr17', 'ENST00000573392.5': 'chr17'}	{'ENST00000622299.5': 81681187.0, 'ENST00000573392.5': 81681201.0}	{'ENST00000622299.5': 81681710.0, 'ENST00000573392.5': 81681710.0}	{'ENST00000622299.5': '-', 'ENST00000573392.5': '-'}	ENST00000622299.5	3UTR	protein_coding	46	chr17	81681187	81681710	-	['ENST00000622299.5', 'ENST00000573392.5']	['ENST00000622299.5']	ENST00000622299.5	3UTR	protein_coding	46	chr17	81681187	81681710	-	[]	['ENST00000622299.5', 'ENST00000573392.5']	ENST00000622299.5	3UTR	protein_coding	46	chr17	81681187	81681710	-	ENST00000622299.5	3UTR	protein_coding	46	chr17	81681187	81681710	-
Merged-chr17-82047915-1	chr17	82047878	82047952	-	0	{'ENST00000310496.9': '3UTR'}	{'ENST00000310496.9': 'protein_coding'}	{'ENST00000310496.9': 51}	{'ENST00000310496.9': 'chr17'}	{'ENST00000310496.9': 82047902.0}	{'ENST00000310496.9': 82048728.0}	{'ENST00000310496.9': '-'}	ENST00000310496.9	3UTR	protein_coding	51	chr17	82047902	82048728	-	['ENST00000310496.9']	['ENST00000310496.9']	ENST00000310496.9	3UTR	protein_coding	51	chr17	82047902	82048728	-	[]	['ENST00000310496.9']	ENST00000310496.9	3UTR	protein_coding	51	chr17	82047902	82048728	-	ENST00000310496.9	3UTR	protein_coding	51	chr17	82047902	82048728	-
Merged-chr4-65573624-1	chr4	65573587	65573661	+	0	{'ENST00000466377.1': 'exon', 'ENST00000273854.7': 'Intron', 'ENST00000432638.6': 'Intron'}	{'ENST00000466377.1': 'processed_pseudogene', 'ENST00000273854.7': 'protein_coding', 'ENST00000432638.6': 'protein_coding'}	{'ENST00000466377.1': 74, 'ENST00000273854.7': 74, 'ENST00000432638.6': 74}	{'ENST00000466377.1': 'chr4', 'ENST00000273854.7': 'chr4', 'ENST00000432638.6': 'chr4'}	{'ENST00000466377.1': 65573459.0, 'ENST00000273854.7': 65495543.0, 'ENST00000432638.6': 65420565.0}	{'ENST00000466377.1': 65574328.0, 'ENST00000273854.7': 65601640.0, 'ENST00000432638.6': 65601640.0}	{'ENST00000466377.1': '+', 'ENST00000273854.7': '-', 'ENST00000432638.6': '-'}	ENST00000466377.1	exon	processed_pseudogene	74	chr4	65573459	65574328	+	['ENST00000466377.1', 'ENST00000273854.7', 'ENST00000432638.6']	[]	ENST00000466377.1	exon	processed_pseudogene	74	chr4	65573459	65574328	+	[]	[]	ENST00000466377.1	exon	processed_pseudogene	74	chr4	65573459	65574328	+	ENST00000466377.1	exon	processed_pseudogene	74	chr4	65573459	65574328	+
Merged-chr4-73871230-1	chr4	73871193	73871267	+	0	{'ENST00000395761.4': '3UTR'}	{'ENST00000395761.4': 'protein_coding'}	{'ENST00000395761.4': 74}	{'ENST00000395761.4': 'chr4'}	{'ENST00000395761.4': 73870534.0}	{'ENST00000395761.4': 73871308.0}	{'ENST00000395761.4': '+'}	ENST00000395761.4	3UTR	protein_coding	74	chr4	73870534	73871308	+	['ENST00000395761.4']	['ENST00000395761.4']	ENST00000395761.4	3UTR	protein_coding	74	chr4	73870534	73871308	+	[]	['ENST00000395761.4']	ENST00000395761.4	3UTR	protein_coding	74	chr4	73870534	73871308	+	ENST00000395761.4	3UTR	protein_coding	74	chr4	73870534	73871308	+
Merged-chr4-75642790-1	chr4	75642753	75642827	-	0	{'ENST00000677171.1': '3UTR', 'ENST00000395719.7': '3UTR', 'ENST00000359707.9': '3UTR', 'ENST00000677060.1': '3UTR', 'ENST00000677201.1': '3UTR'}	{'ENST00000677171.1': 'protein_coding', 'ENST00000395719.7': 'protein_coding', 'ENST00000359707.9': 'protein_coding', 'ENST00000677060.1': 'protein_coding', 'ENST00000677201.1': 'protein_coding'}	{'ENST00000677171.1': 74, 'ENST00000395719.7': 46, 'ENST00000359707.9': 42, 'ENST00000677060.1': 33, 'ENST00000677201.1': 20}	{'ENST00000677171.1': 'chr4', 'ENST00000395719.7': 'chr4', 'ENST00000359707.9': 'chr4', 'ENST00000677060.1': 'chr4', 'ENST00000677201.1': 'chr4'}	{'ENST00000677171.1': 75641849.0, 'ENST00000395719.7': 75642782.0, 'ENST00000359707.9': 75642786.0, 'ENST00000677060.1': 75642795.0, 'ENST00000677201.1': 75642808.0}	{'ENST00000677171.1': 75645432.0, 'ENST00000395719.7': 75645432.0, 'ENST00000359707.9': 75645432.0, 'ENST00000677060.1': 75645616.0, 'ENST00000677201.1': 75645432.0}	{'ENST00000677171.1': '-', 'ENST00000395719.7': '-', 'ENST00000359707.9': '-', 'ENST00000677060.1': '-', 'ENST00000677201.1': '-'}	ENST00000677171.1	3UTR	protein_coding	74	chr4	75641849	75645432	-	['ENST00000677171.1', 'ENST00000395719.7', 'ENST00000359707.9', 'ENST00000677060.1', 'ENST00000677201.1']	['ENST00000359707.9']	ENST00000359707.9	3UTR	protein_coding	42	chr4	75642786	75645432	-	[]	['ENST00000677171.1', 'ENST00000395719.7', 'ENST00000359707.9', 'ENST00000677060.1', 'ENST00000677201.1']	ENST00000677171.1	3UTR	protein_coding	74	chr4	75641849	75645432	-	ENST00000359707.9	3UTR	protein_coding	42	chr4	75642786	75645432	-
Merged-chr4-82423218-1	chr4	82423181	82423255	-	0	{'ENST00000614627.4': 'exon', 'ENST00000295470.10': 'exon'}	{'ENST00000614627.4': 'protein_coding', 'ENST00000295470.10': 'protein_coding'}	{'ENST00000614627.4': 74, 'ENST00000295470.10': 74}	{'ENST00000614627.4': 'chr4', 'ENST00000295470.10': 'chr4'}	{'ENST00000614627.4': 82422565.0, 'ENST00000295470.10': 82422569.0}	{'ENST00000614627.4': 82424883.0, 'ENST00000295470.10': 82424883.0}	{'ENST00000614627.4': '-', 'ENST00000295470.10': '-'}	ENST00000295470.10	exon	protein_coding	74	chr4	82422569	82424883	-	['ENST00000614627.4', 'ENST00000295470.10']	['ENST00000295470.10']	ENST00000295470.10	exon	protein_coding	74	chr4	82422569	82424883	-	[]	[]	ENST00000295470.10	exon	protein_coding	74	chr4	82422569	82424883	-	ENST00000295470.10	exon	protein_coding	74	chr4	82422569	82424883	-
Merged-chr4-94665471-1	chr4	94665434	94665508	+	0	{'ENST00000542407.5': '3UTR', 'ENST00000514743.5': '3UTR', 'ENST00000503974.5': 'Intron', 'ENST00000437932.5': '3UTR', 'ENST00000317968.9': '3UTR'}	{'ENST00000542407.5': 'protein_coding', 'ENST00000514743.5': 'protein_coding', 'ENST00000503974.5': 'protein_coding', 'ENST00000437932.5': 'protein_coding', 'ENST00000317968.9': 'protein_coding'}	{'ENST00000542407.5': 66, 'ENST00000514743.5': 67, 'ENST00000503974.5': 74, 'ENST00000437932.5': 74, 'ENST00000317968.9': 74}	{'ENST00000542407.5': 'chr4', 'ENST00000514743.5': 'chr4', 'ENST00000503974.5': 'chr4', 'ENST00000437932.5': 'chr4', 'ENST00000317968.9': 'chr4'}	{'ENST00000542407.5': 94664065.0, 'ENST00000514743.5': 94664065.0, 'ENST00000503974.5': 94664035.0, 'ENST00000437932.5': 94664065.0, 'ENST00000317968.9': 94664065.0}	{'ENST00000542407.5': 94665500.0, 'ENST00000514743.5': 94665501.0, 'ENST00000503974.5': 94666024.0, 'ENST00000437932.5': 94668227.0, 'ENST00000317968.9': 94668223.0}	{'ENST00000542407.5': '+', 'ENST00000514743.5': '+', 'ENST00000503974.5': '+', 'ENST00000437932.5': '+', 'ENST00000317968.9': '+'}	ENST00000437932.5	3UTR	protein_coding	74	chr4	94664065	94668227	+	['ENST00000542407.5', 'ENST00000514743.5', 'ENST00000503974.5', 'ENST00000437932.5', 'ENST00000317968.9']	['ENST00000317968.9']	ENST00000317968.9	3UTR	protein_coding	74	chr4	94664065	94668223	+	[]	['ENST00000542407.5', 'ENST00000514743.5', 'ENST00000437932.5', 'ENST00000317968.9']	ENST00000437932.5	3UTR	protein_coding	74	chr4	94664065	94668227	+	ENST00000317968.9	3UTR	protein_coding	74	chr4	94664065	94668223	+
Merged-chr11-117171008-1	chr11	117170971	117171045	+	0	{'ENST00000527958.6': '3UTR', 'ENST00000419197.6': 'Intron', 'ENST00000529887.6': 'Intron', 'ENST00000530272.1': 'Intron'}	{'ENST00000527958.6': 'protein_coding', 'ENST00000419197.6': 'protein_coding', 'ENST00000529887.6': 'protein_coding', 'ENST00000530272.1': 'protein_coding'}	{'ENST00000527958.6': 74, 'ENST00000419197.6': 74, 'ENST00000529887.6': 74, 'ENST00000530272.1': 74}	{'ENST00000527958.6': 'chr11', 'ENST00000419197.6': 'chr11', 'ENST00000529887.6': 'chr11', 'ENST00000530272.1': 'chr11'}	{'ENST00000527958.6': 117167697.0, 'ENST00000419197.6': 117163874.0, 'ENST00000529887.6': 117163892.0, 'ENST00000530272.1': 117163892.0}	{'ENST00000527958.6': 117171045.0, 'ENST00000419197.6': 117174892.0, 'ENST00000529887.6': 117175905.0, 'ENST00000530272.1': 117171621.0}	{'ENST00000527958.6': '+', 'ENST00000419197.6': '+', 'ENST00000529887.6': '+', 'ENST00000530272.1': '+'}	ENST00000527958.6	3UTR	protein_coding	74	chr11	117167697	117171045	+	['ENST00000527958.6', 'ENST00000419197.6', 'ENST00000529887.6', 'ENST00000530272.1']	['ENST00000527958.6']	ENST00000527958.6	3UTR	protein_coding	74	chr11	117167697	117171045	+	[]	['ENST00000527958.6']	ENST00000527958.6	3UTR	protein_coding	74	chr11	117167697	117171045	+	ENST00000527958.6	3UTR	protein_coding	74	chr11	117167697	117171045	+
Merged-chr11-119308128-1	chr11	119308091	119308165	+	0	{'ENST00000634586.1': 'exon', 'ENST00000264033.6': '3UTR'}	{'ENST00000634586.1': 'protein_coding', 'ENST00000264033.6': 'protein_coding'}	{'ENST00000634586.1': 56, 'ENST00000264033.6': 58}	{'ENST00000634586.1': 'chr11', 'ENST00000264033.6': 'chr11'}	{'ENST00000634586.1': 119307479.0, 'ENST00000264033.6': 119299779.0}	{'ENST00000634586.1': 119308147.0, 'ENST00000264033.6': 119308149.0}	{'ENST00000634586.1': '+', 'ENST00000264033.6': '+'}	ENST00000264033.6	3UTR	protein_coding	58	chr11	119299779	119308149	+	['ENST00000634586.1', 'ENST00000264033.6']	['ENST00000264033.6']	ENST00000264033.6	3UTR	protein_coding	58	chr11	119299779	119308149	+	[]	['ENST00000264033.6']	ENST00000264033.6	3UTR	protein_coding	58	chr11	119299779	119308149	+	ENST00000264033.6	3UTR	protein_coding	58	chr11	119299779	119308149	+
Merged-chr11-200980-1	chr11	200943	201017	-	0	{'ENST00000410108.5': 'Intron'}	{'ENST00000410108.5': 'protein_coding'}	{'ENST00000410108.5': 74}	{'ENST00000410108.5': 'chr11'}	{'ENST00000410108.5': 180404.0}	{'ENST00000410108.5': 205610.0}	{'ENST00000410108.5': '-'}	ENST00000410108.5	Intron	protein_coding	74	chr11	180404	205610	-	['ENST00000410108.5']	[]	ENST00000410108.5	Intron	protein_coding	74	chr11	180404	205610	-	[]	[]	ENST00000410108.5	Intron	protein_coding	74	chr11	180404	205610	-	ENST00000410108.5	Intron	protein_coding	74	chr11	180404	205610	-
Merged-chr11-494580-1	chr11	494543	494617	-	0	{'ENST00000534797.5': '3UTR', 'ENST00000397614.5': '3UTR', 'ENST00000397615.6': '3UTR', 'ENST00000533410.5': '3UTR', 'ENST00000438658.6': '3UTR', 'ENST00000356187.9': '3UTR'}	{'ENST00000534797.5': 'protein_coding', 'ENST00000397614.5': 'protein_coding', 'ENST00000397615.6': 'protein_coding', 'ENST00000533410.5': 'protein_coding', 'ENST00000438658.6': 'protein_coding', 'ENST00000356187.9': 'protein_coding'}	{'ENST00000534797.5': 74, 'ENST00000397614.5': 74, 'ENST00000397615.6': 74, 'ENST00000533410.5': 72, 'ENST00000438658.6': 70, 'ENST00000356187.9': 57}	{'ENST00000534797.5': 'chr11', 'ENST00000397614.5': 'chr11', 'ENST00000397615.6': 'chr11', 'ENST00000533410.5': 'chr11', 'ENST00000438658.6': 'chr11', 'ENST00000356187.9': 'chr11'}	{'ENST00000534797.5': 494512.0, 'ENST00000397614.5': 494513.0, 'ENST00000397615.6': 494515.0, 'ENST00000533410.5': 494546.0, 'ENST00000438658.6': 494548.0, 'ENST00000356187.9': 494561.0}	{'ENST00000534797.5': 494693.0, 'ENST00000397614.5': 494693.0, 'ENST00000397615.6': 494693.0, 'ENST00000533410.5': 494693.0, 'ENST00000438658.6': 494693.0, 'ENST00000356187.9': 494693.0}	{'ENST00000534797.5': '-', 'ENST00000397614.5': '-', 'ENST00000397615.6': '-', 'ENST00000533410.5': '-', 'ENST00000438658.6': '-', 'ENST00000356187.9': '-'}	ENST00000397615.6	3UTR	protein_coding	74	chr11	494515	494693	-	['ENST00000534797.5', 'ENST00000397614.5', 'ENST00000397615.6', 'ENST00000533410.5', 'ENST00000438658.6', 'ENST00000356187.9']	[]	ENST00000397615.6	3UTR	protein_coding	74	chr11	494515	494693	-	[]	['ENST00000534797.5', 'ENST00000397614.5', 'ENST00000397615.6', 'ENST00000533410.5', 'ENST00000438658.6', 'ENST00000356187.9']	ENST00000534797.5	3UTR	protein_coding	74	chr11	494512	494693	-	ENST00000397615.6	3UTR	protein_coding	74	chr11	494515	494693	-
Merged-chr11-787131-1	chr11	787094	787168	-	0	{'ENST00000330106.5': '3UTR'}	{'ENST00000330106.5': 'protein_coding'}	{'ENST00000330106.5': 54}	{'ENST00000330106.5': 'chr11'}	{'ENST00000330106.5': 787115.0}	{'ENST00000330106.5': 788129.0}	{'ENST00000330106.5': '-'}	ENST00000330106.5	3UTR	protein_coding	54	chr11	787115	788129	-	['ENST00000330106.5']	['ENST00000330106.5']	ENST00000330106.5	3UTR	protein_coding	54	chr11	787115	788129	-	[]	['ENST00000330106.5']	ENST00000330106.5	3UTR	protein_coding	54	chr11	787115	788129	-	ENST00000330106.5	3UTR	protein_coding	54	chr11	787115	788129	-
Merged-chr17-1573746-1	chr17	1573709	1573783	-	0	{'ENST00000301335.10': '3UTR'}	{'ENST00000301335.10': 'protein_coding'}	{'ENST00000301335.10': 74}	{'ENST00000301335.10': 'chr17'}	{'ENST00000301335.10': 1569268.0}	{'ENST00000301335.10': 1575606.0}	{'ENST00000301335.10': '-'}	ENST00000301335.10	3UTR	protein_coding	74	chr17	1569268	1575606	-	['ENST00000301335.10']	['ENST00000301335.10']	ENST00000301335.10	3UTR	protein_coding	74	chr17	1569268	1575606	-	[]	['ENST00000301335.10']	ENST00000301335.10	3UTR	protein_coding	74	chr17	1569268	1575606	-	ENST00000301335.10	3UTR	protein_coding	74	chr17	1569268	1575606	-
Merged-chr17-2381040-1	chr17	2381003	2381077	+	0	{'ENST00000268989.8': '3UTR', 'ENST00000426855.6': '3UTR'}	{'ENST00000268989.8': 'protein_coding', 'ENST00000426855.6': 'protein_coding'}	{'ENST00000268989.8': 51, 'ENST00000426855.6': 55}	{'ENST00000268989.8': 'chr17', 'ENST00000426855.6': 'chr17'}	{'ENST00000268989.8': 2379518.0, 'ENST00000426855.6': 2379518.0}	{'ENST00000268989.8': 2381054.0, 'ENST00000426855.6': 2381058.0}	{'ENST00000268989.8': '+', 'ENST00000426855.6': '+'}	ENST00000426855.6	3UTR	protein_coding	55	chr17	2379518	2381058	+	['ENST00000268989.8', 'ENST00000426855.6']	['ENST00000268989.8']	ENST00000268989.8	3UTR	protein_coding	51	chr17	2379518	2381054	+	[]	['ENST00000268989.8', 'ENST00000426855.6']	ENST00000426855.6	3UTR	protein_coding	55	chr17	2379518	2381058	+	ENST00000268989.8	3UTR	protein_coding	51	chr17	2379518	2381054	+
Merged-chr17-7513583-1	chr17	7513546	7513620	+	0	{'ENST00000674977.2': 'exon'}	{'ENST00000674977.2': 'protein_coding'}	{'ENST00000674977.2': 74}	{'ENST00000674977.2': 'chr17'}	{'ENST00000674977.2': 7513021.0}	{'ENST00000674977.2': 7513772.0}	{'ENST00000674977.2': '+'}	ENST00000674977.2	exon	protein_coding	74	chr17	7513021	7513772	+	['ENST00000674977.2']	[]	ENST00000674977.2	exon	protein_coding	74	chr17	7513021	7513772	+	[]	[]	ENST00000674977.2	exon	protein_coding	74	chr17	7513021	7513772	+	ENST00000674977.2	exon	protein_coding	74	chr17	7513021	7513772	+
Merged-chr17-7912742-1	chr17	7912705	7912779	+	0	{'ENST00000700753.1': '3UTR', 'ENST00000380358.9': '3UTR', 'ENST00000358181.8': '3UTR'}	{'ENST00000700753.1': 'protein_coding', 'ENST00000380358.9': 'protein_coding', 'ENST00000358181.8': 'protein_coding'}	{'ENST00000700753.1': 31, 'ENST00000380358.9': 50, 'ENST00000358181.8': 55}	{'ENST00000700753.1': 'chr17', 'ENST00000380358.9': 'chr17', 'ENST00000358181.8': 'chr17'}	{'ENST00000700753.1': 7911702.0, 'ENST00000380358.9': 7911583.0, 'ENST00000358181.8': 7911583.0}	{'ENST00000700753.1': 7912736.0, 'ENST00000380358.9': 7912755.0, 'ENST00000358181.8': 7912760.0}	{'ENST00000700753.1': '+', 'ENST00000380358.9': '+', 'ENST00000358181.8': '+'}	ENST00000358181.8	3UTR	protein_coding	55	chr17	7911583	7912760	+	['ENST00000700753.1', 'ENST00000380358.9', 'ENST00000358181.8']	[]	ENST00000358181.8	3UTR	protein_coding	55	chr17	7911583	7912760	+	[]	['ENST00000700753.1', 'ENST00000380358.9', 'ENST00000358181.8']	ENST00000358181.8	3UTR	protein_coding	55	chr17	7911583	7912760	+	ENST00000358181.8	3UTR	protein_coding	55	chr17	7911583	7912760	+
Merged-chr4-140382134-1	chr4	140382097	140382171	+	0	{'ENST00000394205.7': '3UTR', 'ENST00000338517.8': '3UTR', 'ENST00000506597.2': '3UTR', 'ENST00000608372.6': '3UTR', 'ENST00000510586.5': '3UTR'}	{'ENST00000394205.7': 'protein_coding', 'ENST00000338517.8': 'protein_coding', 'ENST00000506597.2': 'protein_coding', 'ENST00000608372.6': 'protein_coding', 'ENST00000510586.5': 'protein_coding'}	{'ENST00000394205.7': 74, 'ENST00000338517.8': 74, 'ENST00000506597.2': 74, 'ENST00000608372.6': 74, 'ENST00000510586.5': 74}	{'ENST00000394205.7': 'chr4', 'ENST00000338517.8': 'chr4', 'ENST00000506597.2': 'chr4', 'ENST00000608372.6': 'chr4', 'ENST00000510586.5': 'chr4'}	{'ENST00000394205.7': 140381102.0, 'ENST00000338517.8': 140381102.0, 'ENST00000506597.2': 140381102.0, 'ENST00000608372.6': 140381102.0, 'ENST00000510586.5': 140381102.0}	{'ENST00000394205.7': 140382556.0, 'ENST00000338517.8': 140382554.0, 'ENST00000506597.2': 140382545.0, 'ENST00000608372.6': 140385728.0, 'ENST00000510586.5': 140382549.0}	{'ENST00000394205.7': '+', 'ENST00000338517.8': '+', 'ENST00000506597.2': '+', 'ENST00000608372.6': '+', 'ENST00000510586.5': '+'}	ENST00000394205.7	3UTR	protein_coding	74	chr4	140381102	140382556	+	['ENST00000394205.7', 'ENST00000338517.8', 'ENST00000506597.2', 'ENST00000608372.6', 'ENST00000510586.5']	['ENST00000608372.6']	ENST00000608372.6	3UTR	protein_coding	74	chr4	140381102	140385728	+	[]	['ENST00000394205.7', 'ENST00000338517.8', 'ENST00000506597.2', 'ENST00000608372.6', 'ENST00000510586.5']	ENST00000394205.7	3UTR	protein_coding	74	chr4	140381102	140382556	+	ENST00000608372.6	3UTR	protein_coding	74	chr4	140381102	140385728	+
Merged-chr4-147635212-1	chr4	147635175	147635249	+	0	{'ENST00000296582.8': '3UTR', 'ENST00000508208.5': 'Intron'}	{'ENST00000296582.8': 'protein_coding', 'ENST00000508208.5': 'protein_coding'}	{'ENST00000296582.8': 74, 'ENST00000508208.5': 74}	{'ENST00000296582.8': 'chr4', 'ENST00000508208.5': 'chr4'}	{'ENST00000296582.8': 147634432.0, 'ENST00000508208.5': 147631505.0}	{'ENST00000296582.8': 147636721.0, 'ENST00000508208.5': 147671866.0}	{'ENST00000296582.8': '+', 'ENST00000508208.5': '+'}	ENST00000296582.8	3UTR	protein_coding	74	chr4	147634432	147636721	+	['ENST00000296582.8', 'ENST00000508208.5']	['ENST00000296582.8']	ENST00000296582.8	3UTR	protein_coding	74	chr4	147634432	147636721	+	[]	['ENST00000296582.8']	ENST00000296582.8	3UTR	protein_coding	74	chr4	147634432	147636721	+	ENST00000296582.8	3UTR	protein_coding	74	chr4	147634432	147636721	+
Merged-chr4-156970795-1	chr4	156970758	156970832	-	0	{'ENST00000502773.6': 'Intron'}	{'ENST00000502773.6': 'protein_coding'}	{'ENST00000502773.6': 27}	{'ENST00000502773.6': 'chr4'}	{'ENST00000502773.6': 156850416.0}	{'ENST00000502773.6': 156970785.0}	{'ENST00000502773.6': '-'}	ENST00000502773.6	Intron	protein_coding	27	chr4	156850416	156970785	-	['ENST00000502773.6']	['ENST00000502773.6']	ENST00000502773.6	Intron	protein_coding	27	chr4	156850416	156970785	-	[]	[]	ENST00000502773.6	Intron	protein_coding	27	chr4	156850416	156970785	-	ENST00000502773.6	Intron	protein_coding	27	chr4	156850416	156970785	-
Merged-chr4-159103844-1	chr4	159103807	159103881	+	0	{'ENST00000644474.1': '5UTR', 'ENST00000691494.1': '5UTR'}	{'ENST00000644474.1': 'protein_coding', 'ENST00000691494.1': 'protein_coding'}	{'ENST00000644474.1': 74, 'ENST00000691494.1': 74}	{'ENST00000644474.1': 'chr4', 'ENST00000691494.1': 'chr4'}	{'ENST00000644474.1': 159103013.0, 'ENST00000691494.1': 159103079.0}	{'ENST00000644474.1': 159104162.0, 'ENST00000691494.1': 159104162.0}	{'ENST00000644474.1': '+', 'ENST00000691494.1': '+'}	ENST00000691494.1	5UTR	protein_coding	74	chr4	159103079	159104162	+	['ENST00000644474.1', 'ENST00000691494.1']	['ENST00000691494.1']	ENST00000691494.1	5UTR	protein_coding	74	chr4	159103079	159104162	+	['ENST00000644474.1', 'ENST00000691494.1']	[]	ENST00000691494.1	5UTR	protein_coding	74	chr4	159103079	159104162	+	ENST00000644474.1	5UTR	protein_coding	74	chr4	159103013	159104162	+
Merged-chr4-159360137-1	chr4	159360100	159360174	+	0	{'ENST00000644474.1': '3UTR', 'ENST00000691494.1': '3UTR', 'ENST00000264431.8': '3UTR', 'ENST00000505026.2': '3UTR'}	{'ENST00000644474.1': 'protein_coding', 'ENST00000691494.1': 'protein_coding', 'ENST00000264431.8': 'protein_coding', 'ENST00000505026.2': 'protein_coding'}	{'ENST00000644474.1': 74, 'ENST00000691494.1': 73, 'ENST00000264431.8': 69, 'ENST00000505026.2': 55}	{'ENST00000644474.1': 'chr4', 'ENST00000691494.1': 'chr4', 'ENST00000264431.8': 'chr4', 'ENST00000505026.2': 'chr4'}	{'ENST00000644474.1': 159358137.0, 'ENST00000691494.1': 159358137.0, 'ENST00000264431.8': 159358137.0, 'ENST00000505026.2': 159358137.0}	{'ENST00000644474.1': 159360174.0, 'ENST00000691494.1': 159360173.0, 'ENST00000264431.8': 159360169.0, 'ENST00000505026.2': 159360155.0}	{'ENST00000644474.1': '+', 'ENST00000691494.1': '+', 'ENST00000264431.8': '+', 'ENST00000505026.2': '+'}	ENST00000644474.1	3UTR	protein_coding	74	chr4	159358137	159360174	+	['ENST00000644474.1', 'ENST00000691494.1', 'ENST00000264431.8', 'ENST00000505026.2']	['ENST00000691494.1']	ENST00000691494.1	3UTR	protein_coding	73	chr4	159358137	159360173	+	[]	['ENST00000644474.1', 'ENST00000691494.1', 'ENST00000264431.8', 'ENST00000505026.2']	ENST00000644474.1	3UTR	protein_coding	74	chr4	159358137	159360174	+	ENST00000691494.1	3UTR	protein_coding	73	chr4	159358137	159360173	+
Merged-chr4-165331239-1	chr4	165331202	165331276	+	0	{'ENST00000261507.11': 'Intron', 'ENST00000393766.6': 'Intron'}	{'ENST00000261507.11': 'protein_coding', 'ENST00000393766.6': 'protein_coding'}	{'ENST00000261507.11': 74, 'ENST00000393766.6': 74}	{'ENST00000261507.11': 'chr4', 'ENST00000393766.6': 'chr4'}	{'ENST00000261507.11': 165327764.0, 'ENST00000393766.6': 165327764.0}	{'ENST00000261507.11': 165333339.0, 'ENST00000393766.6': 165337788.0}	{'ENST00000261507.11': '+', 'ENST00000393766.6': '+'}	ENST00000261507.11	Intron	protein_coding	74	chr4	165327764	165333339	+	['ENST00000261507.11', 'ENST00000393766.6']	['ENST00000261507.11']	ENST00000261507.11	Intron	protein_coding	74	chr4	165327764	165333339	+	[]	[]	ENST00000261507.11	Intron	protein_coding	74	chr4	165327764	165333339	+	ENST00000261507.11	Intron	protein_coding	74	chr4	165327764	165333339	+
Merged-chr4-175651823-1	chr4	175651786	175651860	-	0	{'ENST00000280187.11': 'Intron'}	{'ENST00000280187.11': 'protein_coding'}	{'ENST00000280187.11': 47}	{'ENST00000280187.11': 'chr4'}	{'ENST00000280187.11': 175640829.0}	{'ENST00000280187.11': 175651833.0}	{'ENST00000280187.11': '-'}	ENST00000280187.11	Intron	protein_coding	47	chr4	175640829	175651833	-	['ENST00000280187.11']	[]	ENST00000280187.11	Intron	protein_coding	47	chr4	175640829	175651833	-	[]	[]	ENST00000280187.11	Intron	protein_coding	47	chr4	175640829	175651833	-	ENST00000280187.11	Intron	protein_coding	47	chr4	175640829	175651833	-
Merged-chr11-10511949-1	chr11	10511912	10511986	-	0	{'ENST00000265981.7': '3UTR'}	{'ENST00000265981.7': 'protein_coding'}	{'ENST00000265981.7': 74}	{'ENST00000265981.7': 'chr11'}	{'ENST00000265981.7': 10511673.0}	{'ENST00000265981.7': 10514918.0}	{'ENST00000265981.7': '-'}	ENST00000265981.7	3UTR	protein_coding	74	chr11	10511673	10514918	-	['ENST00000265981.7']	['ENST00000265981.7']	ENST00000265981.7	3UTR	protein_coding	74	chr11	10511673	10514918	-	[]	['ENST00000265981.7']	ENST00000265981.7	3UTR	protein_coding	74	chr11	10511673	10514918	-	ENST00000265981.7	3UTR	protein_coding	74	chr11	10511673	10514918	-
Merged-chr11-15355258-1	chr11	15355221	15355295	+	0	{'Intergenic': 'Unlabeled'}	{'Intergenic': 'Intergenic'}	{'Intergenic': 0}	{'Intergenic': nan}	{'Intergenic': nan}	{'Intergenic': nan}	{'Intergenic': '+'}	Intergenic	Unlabeled	Intergenic	0				+	['Intergenic']	[]	Intergenic	Unlabeled	Intergenic	0				+	[]	[]	Intergenic	Unlabeled	Intergenic	0				+	Intergenic	Unlabeled	Intergenic	0				+
Merged-chr11-17169631-1	chr11	17169594	17169668	-	0	{'ENST00000265970.11': 'exon', 'ENST00000691414.1': 'exon'}	{'ENST00000265970.11': 'protein_coding', 'ENST00000691414.1': 'protein_coding'}	{'ENST00000265970.11': 74, 'ENST00000691414.1': 74}	{'ENST00000265970.11': 'chr11', 'ENST00000691414.1': 'chr11'}	{'ENST00000265970.11': 17168677.0, 'ENST00000691414.1': 17168677.0}	{'ENST00000265970.11': 17169741.0, 'ENST00000691414.1': 17169806.0}	{'ENST00000265970.11': '-', 'ENST00000691414.1': '-'}	ENST00000265970.11	exon	protein_coding	74	chr11	17168677	17169741	-	['ENST00000265970.11', 'ENST00000691414.1']	['ENST00000691414.1']	ENST00000691414.1	exon	protein_coding	74	chr11	17168677	17169806	-	[]	[]	ENST00000691414.1	exon	protein_coding	74	chr11	17168677	17169806	-	ENST00000691414.1	exon	protein_coding	74	chr11	17168677	17169806	-
Merged-chr11-57551670-1	chr11	57551633	57551707	-	0	{'ENST00000340573.8': '3UTR', 'ENST00000287156.9': '3UTR'}	{'ENST00000340573.8': 'protein_coding', 'ENST00000287156.9': 'protein_coding'}	{'ENST00000340573.8': 52, 'ENST00000287156.9': 46}	{'ENST00000340573.8': 'chr11', 'ENST00000287156.9': 'chr11'}	{'ENST00000340573.8': 57551656.0, 'ENST00000287156.9': 57551662.0}	{'ENST00000340573.8': 57552360.0, 'ENST00000287156.9': 57552360.0}	{'ENST00000340573.8': '-', 'ENST00000287156.9': '-'}	ENST00000340573.8	3UTR	protein_coding	52	chr11	57551656	57552360	-	['ENST00000340573.8', 'ENST00000287156.9']	['ENST00000287156.9']	ENST00000287156.9	3UTR	protein_coding	46	chr11	57551662	57552360	-	[]	['ENST00000340573.8', 'ENST00000287156.9']	ENST00000340573.8	3UTR	protein_coding	52	chr11	57551656	57552360	-	ENST00000287156.9	3UTR	protein_coding	46	chr11	57551662	57552360	-
Merged-chr11-60923421-1	chr11	60923384	60923458	+	0	{'ENST00000227525.8': '3UTR', 'ENST00000543907.2': 'Intron'}	{'ENST00000227525.8': 'protein_coding', 'ENST00000543907.2': 'lncRNA'}	{'ENST00000227525.8': 59, 'ENST00000543907.2': 74}	{'ENST00000227525.8': 'chr11', 'ENST00000543907.2': 'chr11'}	{'ENST00000227525.8': 60922163.0, 'ENST00000543907.2': 60919153.0}	{'ENST00000227525.8': 60923443.0, 'ENST00000543907.2': 60925218.0}	{'ENST00000227525.8': '+', 'ENST00000543907.2': '-'}	ENST00000543907.2	Intron	lncRNA	74	chr11	60919153	60925218	-	['ENST00000227525.8', 'ENST00000543907.2']	['ENST00000227525.8']	ENST00000227525.8	3UTR	protein_coding	59	chr11	60922163	60923443	+	[]	['ENST00000227525.8']	ENST00000227525.8	3UTR	protein_coding	59	chr11	60922163	60923443	+	ENST00000227525.8	3UTR	protein_coding	59	chr11	60922163	60923443	+
Merged-chr11-62145278-1	chr11	62145241	62145315	+	0	{'ENST00000278849.4': 'Intron'}	{'ENST00000278849.4': 'protein_coding'}	{'ENST00000278849.4': 27}	{'ENST00000278849.4': 'chr11'}	{'ENST00000278849.4': 62145289.0}	{'ENST00000278849.4': 62145628.0}	{'ENST00000278849.4': '+'}	ENST00000278849.4	Intron	protein_coding	27	chr11	62145289	62145628	+	['ENST00000278849.4']	[]	ENST00000278849.4	Intron	protein_coding	27	chr11	62145289	62145628	+	[]	[]	ENST00000278849.4	Intron	protein_coding	27	chr11	62145289	62145628	+	ENST00000278849.4	Intron	protein_coding	27	chr11	62145289	62145628	+
Merged-chr11-62790455-1	chr11	62790418	62790492	-	0	{'ENST00000307366.8': '3UTR', 'ENST00000525631.1': 'Intron'}	{'ENST00000307366.8': 'protein_coding', 'ENST00000525631.1': 'protein_coding'}	{'ENST00000307366.8': 74, 'ENST00000525631.1': 74}	{'ENST00000307366.8': 'chr11', 'ENST00000525631.1': 'chr11'}	{'ENST00000307366.8': 62789971.0, 'ENST00000525631.1': 62787925.0}	{'ENST00000307366.8': 62790625.0, 'ENST00000525631.1': 62791678.0}	{'ENST00000307366.8': '-', 'ENST00000525631.1': '-'}	ENST00000307366.8	3UTR	protein_coding	74	chr11	62789971	62790625	-	['ENST00000307366.8', 'ENST00000525631.1']	['ENST00000307366.8']	ENST00000307366.8	3UTR	protein_coding	74	chr11	62789971	62790625	-	[]	['ENST00000307366.8']	ENST00000307366.8	3UTR	protein_coding	74	chr11	62789971	62790625	-	ENST00000307366.8	3UTR	protein_coding	74	chr11	62789971	62790625	-
Merged-chr11-63909570-1	chr11	63909533	63909607	+	0	{'ENST00000377810.8': '3UTR', 'ENST00000361128.9': '3UTR', 'ENST00000350490.11': '3UTR', 'ENST00000402010.8': '3UTR', 'ENST00000502399.7': '3UTR', 'ENST00000679216.1': '3UTR'}	{'ENST00000377810.8': 'protein_coding', 'ENST00000361128.9': 'protein_coding', 'ENST00000350490.11': 'protein_coding', 'ENST00000402010.8': 'protein_coding', 'ENST00000502399.7': 'protein_coding', 'ENST00000679216.1': 'protein_coding'}	{'ENST00000377810.8': 74, 'ENST00000361128.9': 46, 'ENST00000350490.11': 63, 'ENST00000402010.8': 74, 'ENST00000502399.7': 40, 'ENST00000679216.1': 6}	{'ENST00000377810.8': 'chr11', 'ENST00000361128.9': 'chr11', 'ENST00000350490.11': 'chr11', 'ENST00000402010.8': 'chr11', 'ENST00000502399.7': 'chr11', 'ENST00000679216.1': 'chr11'}	{'ENST00000377810.8': 63909235.0, 'ENST00000361128.9': 63909235.0, 'ENST00000350490.11': 63909235.0, 'ENST00000402010.8': 63909235.0, 'ENST00000502399.7': 63909235.0, 'ENST00000679216.1': 63909235.0}	{'ENST00000377810.8': 63911019.0, 'ENST00000361128.9': 63909579.0, 'ENST00000350490.11': 63909596.0, 'ENST00000402010.8': 63911020.0, 'ENST00000502399.7': 63909573.0, 'ENST00000679216.1': 63909539.0}	{'ENST00000377810.8': '+', 'ENST00000361128.9': '+', 'ENST00000350490.11': '+', 'ENST00000402010.8': '+', 'ENST00000502399.7': '+', 'ENST00000679216.1': '+'}	ENST00000377810.8	3UTR	protein_coding	74	chr11	63909235	63911019	+	['ENST00000377810.8', 'ENST00000361128.9', 'ENST00000350490.11', 'ENST00000402010.8', 'ENST00000502399.7', 'ENST00000679216.1']	['ENST00000402010.8']	ENST00000402010.8	3UTR	protein_coding	74	chr11	63909235	63911020	+	[]	['ENST00000377810.8', 'ENST00000361128.9', 'ENST00000350490.11', 'ENST00000402010.8', 'ENST00000502399.7', 'ENST00000679216.1']	ENST00000377810.8	3UTR	protein_coding	74	chr11	63909235	63911019	+	ENST00000402010.8	3UTR	protein_coding	74	chr11	63909235	63911020	+
Merged-chr11-67506527-1	chr11	67506490	67506564	-	0	{'ENST00000301488.8': '3UTR'}	{'ENST00000301488.8': 'protein_coding'}	{'ENST00000301488.8': 68}	{'ENST00000301488.8': 'chr11'}	{'ENST00000301488.8': 67506497.0}	{'ENST00000301488.8': 67506947.0}	{'ENST00000301488.8': '-'}	ENST00000301488.8	3UTR	protein_coding	68	chr11	67506497	67506947	-	['ENST00000301488.8']	['ENST00000301488.8']	ENST00000301488.8	3UTR	protein_coding	68	chr11	67506497	67506947	-	[]	['ENST00000301488.8']	ENST00000301488.8	3UTR	protein_coding	68	chr11	67506497	67506947	-	ENST00000301488.8	3UTR	protein_coding	68	chr11	67506497	67506947	-
Merged-chr11-72002871-1	chr11	72002834	72002908	-	0	{'ENST00000497194.6': '3UTR', 'ENST00000351960.10': '3UTR', 'ENST00000620566.4': '3UTR'}	{'ENST00000497194.6': 'protein_coding', 'ENST00000351960.10': 'protein_coding', 'ENST00000620566.4': 'protein_coding'}	{'ENST00000497194.6': 74, 'ENST00000351960.10': 45, 'ENST00000620566.4': 44}	{'ENST00000497194.6': 'chr11', 'ENST00000351960.10': 'chr11', 'ENST00000620566.4': 'chr11'}	{'ENST00000497194.6': 72001643.0, 'ENST00000351960.10': 72002864.0, 'ENST00000620566.4': 72002865.0}	{'ENST00000497194.6': 72003753.0, 'ENST00000351960.10': 72003529.0, 'ENST00000620566.4': 72003529.0}	{'ENST00000497194.6': '+', 'ENST00000351960.10': '-', 'ENST00000620566.4': '-'}	ENST00000497194.6	3UTR	protein_coding	74	chr11	72001643	72003753	+	['ENST00000497194.6', 'ENST00000351960.10', 'ENST00000620566.4']	[]	ENST00000497194.6	3UTR	protein_coding	74	chr11	72001643	72003753	+	[]	['ENST00000497194.6', 'ENST00000351960.10', 'ENST00000620566.4']	ENST00000497194.6	3UTR	protein_coding	74	chr11	72001643	72003753	+	ENST00000497194.6	3UTR	protein_coding	74	chr11	72001643	72003753	+
Merged-chr11-72015525-1	chr11	72015488	72015562	-	0	{'ENST00000358965.10': 'exon', 'ENST00000502284.1': 'exon', 'ENST00000351960.10': 'Intron'}	{'ENST00000358965.10': 'protein_coding', 'ENST00000502284.1': 'lncRNA', 'ENST00000351960.10': 'protein_coding'}	{'ENST00000358965.10': 74, 'ENST00000502284.1': 74, 'ENST00000351960.10': 74}	{'ENST00000358965.10': 'chr11', 'ENST00000502284.1': 'chr11', 'ENST00000351960.10': 'chr11'}	{'ENST00000358965.10': 72012895.0, 'ENST00000502284.1': 72014291.0, 'ENST00000351960.10': 72010854.0}	{'ENST00000358965.10': 72016260.0, 'ENST00000502284.1': 72016887.0, 'ENST00000351960.10': 72016407.0}	{'ENST00000358965.10': '-', 'ENST00000502284.1': '+', 'ENST00000351960.10': '-'}	ENST00000502284.1	exon	lncRNA	74	chr11	72014291	72016887	+	['ENST00000358965.10', 'ENST00000502284.1', 'ENST00000351960.10']	[]	ENST00000502284.1	exon	lncRNA	74	chr11	72014291	72016887	+	[]	[]	ENST00000502284.1	exon	lncRNA	74	chr11	72014291	72016887	+	ENST00000502284.1	exon	lncRNA	74	chr11	72014291	72016887	+
Merged-chr11-86345654-1	chr11	86345617	86345691	+	0	{'ENST00000533986.5': '3UTR', 'ENST00000278483.8': '3UTR'}	{'ENST00000533986.5': 'protein_coding', 'ENST00000278483.8': 'protein_coding'}	{'ENST00000533986.5': 21, 'ENST00000278483.8': 56}	{'ENST00000533986.5': 'chr11', 'ENST00000278483.8': 'chr11'}	{'ENST00000533986.5': 86344765.0, 'ENST00000278483.8': 86345636.0}	{'ENST00000533986.5': 86345638.0, 'ENST00000278483.8': 86345943.0}	{'ENST00000533986.5': '+', 'ENST00000278483.8': '+'}	ENST00000278483.8	3UTR	protein_coding	56	chr11	86345636	86345943	+	['ENST00000533986.5', 'ENST00000278483.8']	['ENST00000278483.8']	ENST00000278483.8	3UTR	protein_coding	56	chr11	86345636	86345943	+	[]	['ENST00000533986.5', 'ENST00000278483.8']	ENST00000278483.8	3UTR	protein_coding	56	chr11	86345636	86345943	+	ENST00000278483.8	3UTR	protein_coding	56	chr11	86345636	86345943	+
Merged-chr11-94416095-1	chr11	94416058	94416132	-	0	{'ENST00000323929.8': '3UTR'}	{'ENST00000323929.8': 'protein_coding'}	{'ENST00000323929.8': 74}	{'ENST00000323929.8': 'chr11'}	{'ENST00000323929.8': 94415570.0}	{'ENST00000323929.8': 94420127.0}	{'ENST00000323929.8': '-'}	ENST00000323929.8	3UTR	protein_coding	74	chr11	94415570	94420127	-	['ENST00000323929.8']	['ENST00000323929.8']	ENST00000323929.8	3UTR	protein_coding	74	chr11	94415570	94420127	-	[]	['ENST00000323929.8']	ENST00000323929.8	3UTR	protein_coding	74	chr11	94415570	94420127	-	ENST00000323929.8	3UTR	protein_coding	74	chr11	94415570	94420127	-
Merged-chr11-94972080-1	chr11	94972043	94972117	-	0	{'ENST00000279839.8': 'Intron'}	{'ENST00000279839.8': 'protein_coding'}	{'ENST00000279839.8': 11}	{'ENST00000279839.8': 'chr11'}	{'ENST00000279839.8': 94971487.0}	{'ENST00000279839.8': 94972054.0}	{'ENST00000279839.8': '-'}	ENST00000279839.8	Intron	protein_coding	11	chr11	94971487	94972054	-	['ENST00000279839.8']	['ENST00000279839.8']	ENST00000279839.8	Intron	protein_coding	11	chr11	94971487	94972054	-	[]	[]	ENST00000279839.8	Intron	protein_coding	11	chr11	94971487	94972054	-	ENST00000279839.8	Intron	protein_coding	11	chr11	94971487	94972054	-
Merged-chr11-110236119-1	chr11	110236082	110236156	-	0	{'ENST00000528498.5': 'Intron', 'ENST00000530301.5': 'Intron'}	{'ENST00000528498.5': 'protein_coding', 'ENST00000530301.5': 'protein_coding'}	{'ENST00000528498.5': 16, 'ENST00000530301.5': 74}	{'ENST00000528498.5': 'chr11', 'ENST00000530301.5': 'chr11'}	{'ENST00000528498.5': 110233479.0, 'ENST00000530301.5': 110232004.0}	{'ENST00000528498.5': 110236098.0, 'ENST00000530301.5': 110258156.0}	{'ENST00000528498.5': '-', 'ENST00000530301.5': '-'}	ENST00000530301.5	Intron	protein_coding	74	chr11	110232004	110258156	-	['ENST00000528498.5', 'ENST00000530301.5']	[]	ENST00000530301.5	Intron	protein_coding	74	chr11	110232004	110258156	-	[]	[]	ENST00000530301.5	Intron	protein_coding	74	chr11	110232004	110258156	-	ENST00000530301.5	Intron	protein_coding	74	chr11	110232004	110258156	-
Merged-chr11-110237506-1	chr11	110237469	110237543	-	0	{'ENST00000528498.5': 'Intron', 'ENST00000530301.5': 'Intron'}	{'ENST00000528498.5': 'protein_coding', 'ENST00000530301.5': 'protein_coding'}	{'ENST00000528498.5': 22, 'ENST00000530301.5': 74}	{'ENST00000528498.5': 'chr11', 'ENST00000530301.5': 'chr11'}	{'ENST00000528498.5': 110236191.0, 'ENST00000530301.5': 110232004.0}	{'ENST00000528498.5': 110237491.0, 'ENST00000530301.5': 110258156.0}	{'ENST00000528498.5': '-', 'ENST00000530301.5': '-'}	ENST00000530301.5	Intron	protein_coding	74	chr11	110232004	110258156	-	['ENST00000528498.5', 'ENST00000530301.5']	[]	ENST00000530301.5	Intron	protein_coding	74	chr11	110232004	110258156	-	[]	[]	ENST00000530301.5	Intron	protein_coding	74	chr11	110232004	110258156	-	ENST00000530301.5	Intron	protein_coding	74	chr11	110232004	110258156	-
Merged-chr11-117285708-1	chr11	117285671	117285745	-	0	{'ENST00000300650.9': '3UTR', 'ENST00000531452.5': '3UTR', 'ENST00000530849.1': '3UTR', 'ENST00000680971.1': '3UTR', 'ENST00000313005.11': '3UTR', 'ENST00000392937.10': '3UTR'}	{'ENST00000300650.9': 'protein_coding', 'ENST00000531452.5': 'protein_coding', 'ENST00000530849.1': 'protein_coding', 'ENST00000680971.1': 'protein_coding', 'ENST00000313005.11': 'protein_coding', 'ENST00000392937.10': 'protein_coding'}	{'ENST00000300650.9': 74, 'ENST00000531452.5': 17, 'ENST00000530849.1': 74, 'ENST00000680971.1': 74, 'ENST00000313005.11': 48, 'ENST00000392937.10': 40}	{'ENST00000300650.9': 'chr11', 'ENST00000531452.5': 'chr11', 'ENST00000530849.1': 'chr11', 'ENST00000680971.1': 'chr11', 'ENST00000313005.11': 'chr11', 'ENST00000392937.10': 'chr11'}	{'ENST00000300650.9': 117285149.0, 'ENST00000531452.5': 117285149.0, 'ENST00000530849.1': 117285149.0, 'ENST00000680971.1': 117285232.0, 'ENST00000313005.11': 117285698.0, 'ENST00000392937.10': 117285706.0}	{'ENST00000300650.9': 117286454.0, 'ENST00000531452.5': 117285688.0, 'ENST00000530849.1': 117286445.0, 'ENST00000680971.1': 117289568.0, 'ENST00000313005.11': 117289568.0, 'ENST00000392937.10': 117289568.0}	{'ENST00000300650.9': '+', 'ENST00000531452.5': '+', 'ENST00000530849.1': '+', 'ENST00000680971.1': '-', 'ENST00000313005.11': '-', 'ENST00000392937.10': '-'}	ENST00000680971.1	3UTR	protein_coding	74	chr11	117285232	117289568	-	['ENST00000300650.9', 'ENST00000531452.5', 'ENST00000530849.1', 'ENST00000680971.1', 'ENST00000313005.11', 'ENST00000392937.10']	['ENST00000300650.9', 'ENST00000313005.11']	ENST00000300650.9	3UTR	protein_coding	74	chr11	117285149	117286454	+	[]	['ENST00000300650.9', 'ENST00000531452.5', 'ENST00000530849.1', 'ENST00000680971.1', 'ENST00000313005.11', 'ENST00000392937.10']	ENST00000300650.9	3UTR	protein_coding	74	chr11	117285149	117286454	+	ENST00000300650.9	3UTR	protein_coding	74	chr11	117285149	117286454	+
Merged-chr11-119081960-1	chr11	119081923	119081997	+	0	{'ENST00000621676.5': '3UTR', 'ENST00000614944.4': '3UTR'}	{'ENST00000621676.5': 'protein_coding', 'ENST00000614944.4': 'protein_coding'}	{'ENST00000621676.5': 49, 'ENST00000614944.4': 44}	{'ENST00000621676.5': 'chr11', 'ENST00000614944.4': 'chr11'}	{'ENST00000621676.5': 119081621.0, 'ENST00000614944.4': 119081621.0}	{'ENST00000621676.5': 119081972.0, 'ENST00000614944.4': 119081967.0}	{'ENST00000621676.5': '+', 'ENST00000614944.4': '+'}	ENST00000621676.5	3UTR	protein_coding	49	chr11	119081621	119081972	+	['ENST00000621676.5', 'ENST00000614944.4']	['ENST00000621676.5']	ENST00000621676.5	3UTR	protein_coding	49	chr11	119081621	119081972	+	[]	['ENST00000621676.5', 'ENST00000614944.4']	ENST00000621676.5	3UTR	protein_coding	49	chr11	119081621	119081972	+	ENST00000621676.5	3UTR	protein_coding	49	chr11	119081621	119081972	+
Merged-chr11-125455925-1	chr11	125455888	125455962	-	0	{'ENST00000278919.8': 'exon'}	{'ENST00000278919.8': 'protein_coding'}	{'ENST00000278919.8': 74}	{'ENST00000278919.8': 'chr11'}	{'ENST00000278919.8': 125455835.0}	{'ENST00000278919.8': 125456106.0}	{'ENST00000278919.8': '-'}	ENST00000278919.8	exon	protein_coding	74	chr11	125455835	125456106	-	['ENST00000278919.8']	['ENST00000278919.8']	ENST00000278919.8	exon	protein_coding	74	chr11	125455835	125456106	-	[]	[]	ENST00000278919.8	exon	protein_coding	74	chr11	125455835	125456106	-	ENST00000278919.8	exon	protein_coding	74	chr11	125455835	125456106	-
Merged-chr11-125956827-1	chr11	125956790	125956864	-	0	{'ENST00000638636.2': '3UTR', 'ENST00000392693.7': '3UTR', 'ENST00000531738.6': '3UTR'}	{'ENST00000638636.2': 'protein_coding', 'ENST00000392693.7': 'protein_coding', 'ENST00000531738.6': 'protein_coding'}	{'ENST00000638636.2': 74, 'ENST00000392693.7': 74, 'ENST00000531738.6': 44}	{'ENST00000638636.2': 'chr11', 'ENST00000392693.7': 'chr11', 'ENST00000531738.6': 'chr11'}	{'ENST00000638636.2': 125955912.0, 'ENST00000392693.7': 125955796.0, 'ENST00000531738.6': 125956821.0}	{'ENST00000638636.2': 125958647.0, 'ENST00000392693.7': 125960944.0, 'ENST00000531738.6': 125960944.0}	{'ENST00000638636.2': '+', 'ENST00000392693.7': '-', 'ENST00000531738.6': '-'}	ENST00000638636.2	3UTR	protein_coding	74	chr11	125955912	125958647	+	['ENST00000638636.2', 'ENST00000392693.7', 'ENST00000531738.6']	['ENST00000531738.6']	ENST00000531738.6	3UTR	protein_coding	44	chr11	125956821	125960944	-	[]	['ENST00000638636.2', 'ENST00000392693.7', 'ENST00000531738.6']	ENST00000638636.2	3UTR	protein_coding	74	chr11	125955912	125958647	+	ENST00000531738.6	3UTR	protein_coding	44	chr11	125956821	125960944	-
Merged-chr11-128965066-1	chr11	128965029	128965103	-	0	{'ENST00000310343.13': '3UTR'}	{'ENST00000310343.13': 'protein_coding'}	{'ENST00000310343.13': 44}	{'ENST00000310343.13': 'chr11'}	{'ENST00000310343.13': 128965060.0}	{'ENST00000310343.13': 128968909.0}	{'ENST00000310343.13': '-'}	ENST00000310343.13	3UTR	protein_coding	44	chr11	128965060	128968909	-	['ENST00000310343.13']	[]	ENST00000310343.13	3UTR	protein_coding	44	chr11	128965060	128968909	-	[]	['ENST00000310343.13']	ENST00000310343.13	3UTR	protein_coding	44	chr11	128965060	128968909	-	ENST00000310343.13	3UTR	protein_coding	44	chr11	128965060	128968909	-
Merged-chr11-134140745-1	chr11	134140708	134140782	+	0	{'ENST00000441717.3': 'Intron', 'ENST00000299106.9': 'Intron'}	{'ENST00000441717.3': 'protein_coding', 'ENST00000299106.9': 'protein_coding'}	{'ENST00000441717.3': 13, 'ENST00000299106.9': 13}	{'ENST00000441717.3': 'chr11', 'ENST00000299106.9': 'chr11'}	{'ENST00000441717.3': 134140770.0, 'ENST00000299106.9': 134140770.0}	{'ENST00000441717.3': 134144791.0, 'ENST00000299106.9': 134144240.0}	{'ENST00000441717.3': '+', 'ENST00000299106.9': '+'}	ENST00000441717.3	Intron	protein_coding	13	chr11	134140770	134144791	+	['ENST00000441717.3', 'ENST00000299106.9']	['ENST00000299106.9']	ENST00000299106.9	Intron	protein_coding	13	chr11	134140770	134144240	+	[]	[]	ENST00000299106.9	Intron	protein_coding	13	chr11	134140770	134144240	+	ENST00000299106.9	Intron	protein_coding	13	chr11	134140770	134144240	+
Merged-chr11-868388-1	chr11	868351	868425	-	0	{'ENST00000323578.13': '3UTR', 'ENST00000454838.6': '3UTR'}	{'ENST00000323578.13': 'protein_coding', 'ENST00000454838.6': 'protein_coding'}	{'ENST00000323578.13': 74, 'ENST00000454838.6': 74}	{'ENST00000323578.13': 'chr11', 'ENST00000454838.6': 'chr11'}	{'ENST00000323578.13': 867859.0, 'ENST00000454838.6': 867860.0}	{'ENST00000323578.13': 869860.0, 'ENST00000454838.6': 869860.0}	{'ENST00000323578.13': '-', 'ENST00000454838.6': '-'}	ENST00000454838.6	3UTR	protein_coding	74	chr11	867860	869860	-	['ENST00000323578.13', 'ENST00000454838.6']	['ENST00000323578.13']	ENST00000323578.13	3UTR	protein_coding	74	chr11	867859	869860	-	[]	['ENST00000323578.13', 'ENST00000454838.6']	ENST00000323578.13	3UTR	protein_coding	74	chr11	867859	869860	-	ENST00000323578.13	3UTR	protein_coding	74	chr11	867859	869860	-
Merged-chr11-869763-1	chr11	869726	869800	-	0	{'ENST00000429789.6': '3UTR', 'ENST00000528581.5': '3UTR', 'ENST00000436108.6': '3UTR', 'ENST00000323578.13': '3UTR', 'ENST00000454838.6': '3UTR'}	{'ENST00000429789.6': 'protein_coding', 'ENST00000528581.5': 'protein_coding', 'ENST00000436108.6': 'protein_coding', 'ENST00000323578.13': 'protein_coding', 'ENST00000454838.6': 'protein_coding'}	{'ENST00000429789.6': 39, 'ENST00000528581.5': 38, 'ENST00000436108.6': 34, 'ENST00000323578.13': 74, 'ENST00000454838.6': 74}	{'ENST00000429789.6': 'chr11', 'ENST00000528581.5': 'chr11', 'ENST00000436108.6': 'chr11', 'ENST00000323578.13': 'chr11', 'ENST00000454838.6': 'chr11'}	{'ENST00000429789.6': 869762.0, 'ENST00000528581.5': 869763.0, 'ENST00000436108.6': 869767.0, 'ENST00000323578.13': 867859.0, 'ENST00000454838.6': 867860.0}	{'ENST00000429789.6': 869860.0, 'ENST00000528581.5': 869860.0, 'ENST00000436108.6': 869860.0, 'ENST00000323578.13': 869860.0, 'ENST00000454838.6': 869860.0}	{'ENST00000429789.6': '-', 'ENST00000528581.5': '-', 'ENST00000436108.6': '-', 'ENST00000323578.13': '-', 'ENST00000454838.6': '-'}	ENST00000454838.6	3UTR	protein_coding	74	chr11	867860	869860	-	['ENST00000429789.6', 'ENST00000528581.5', 'ENST00000436108.6', 'ENST00000323578.13', 'ENST00000454838.6']	['ENST00000323578.13']	ENST00000323578.13	3UTR	protein_coding	74	chr11	867859	869860	-	[]	['ENST00000429789.6', 'ENST00000528581.5', 'ENST00000436108.6', 'ENST00000323578.13', 'ENST00000454838.6']	ENST00000323578.13	3UTR	protein_coding	74	chr11	867859	869860	-	ENST00000323578.13	3UTR	protein_coding	74	chr11	867859	869860	-
Merged-chr11-4138879-1	chr11	4138842	4138916	+	0	{'ENST00000300738.10': '3UTR'}	{'ENST00000300738.10': 'protein_coding'}	{'ENST00000300738.10': 74}	{'ENST00000300738.10': 'chr11'}	{'ENST00000300738.10': 4138381.0}	{'ENST00000300738.10': 4138932.0}	{'ENST00000300738.10': '+'}	ENST00000300738.10	3UTR	protein_coding	74	chr11	4138381	4138932	+	['ENST00000300738.10']	['ENST00000300738.10']	ENST00000300738.10	3UTR	protein_coding	74	chr11	4138381	4138932	+	[]	['ENST00000300738.10']	ENST00000300738.10	3UTR	protein_coding	74	chr11	4138381	4138932	+	ENST00000300738.10	3UTR	protein_coding	74	chr11	4138381	4138932	+
Merged-chr11-6476530-1	chr11	6476493	6476567	-	0	{'ENST00000614314.4': '3UTR', 'ENST00000254584.6': '3UTR', 'ENST00000396777.8': '3UTR'}	{'ENST00000614314.4': 'protein_coding', 'ENST00000254584.6': 'protein_coding', 'ENST00000396777.8': 'protein_coding'}	{'ENST00000614314.4': 74, 'ENST00000254584.6': 74, 'ENST00000396777.8': 49}	{'ENST00000614314.4': 'chr11', 'ENST00000254584.6': 'chr11', 'ENST00000396777.8': 'chr11'}	{'ENST00000614314.4': 6474683.0, 'ENST00000254584.6': 6475680.0, 'ENST00000396777.8': 6476519.0}	{'ENST00000614314.4': 6477115.0, 'ENST00000254584.6': 6477115.0, 'ENST00000396777.8': 6477115.0}	{'ENST00000614314.4': '-', 'ENST00000254584.6': '-', 'ENST00000396777.8': '-'}	ENST00000254584.6	3UTR	protein_coding	74	chr11	6475680	6477115	-	['ENST00000614314.4', 'ENST00000254584.6', 'ENST00000396777.8']	['ENST00000396777.8']	ENST00000396777.8	3UTR	protein_coding	49	chr11	6476519	6477115	-	[]	['ENST00000614314.4', 'ENST00000254584.6', 'ENST00000396777.8']	ENST00000614314.4	3UTR	protein_coding	74	chr11	6474683	6477115	-	ENST00000396777.8	3UTR	protein_coding	49	chr11	6476519	6477115	-
Merged-chr11-9446231-1	chr11	9446194	9446268	+	0	{'ENST00000379719.8': '3UTR'}	{'ENST00000379719.8': 'protein_coding'}	{'ENST00000379719.8': 74}	{'ENST00000379719.8': 'chr11'}	{'ENST00000379719.8': 9445192.0}	{'ENST00000379719.8': 9448127.0}	{'ENST00000379719.8': '+'}	ENST00000379719.8	3UTR	protein_coding	74	chr11	9445192	9448127	+	['ENST00000379719.8']	['ENST00000379719.8']	ENST00000379719.8	3UTR	protein_coding	74	chr11	9445192	9448127	+	[]	['ENST00000379719.8']	ENST00000379719.8	3UTR	protein_coding	74	chr11	9445192	9448127	+	ENST00000379719.8	3UTR	protein_coding	74	chr11	9445192	9448127	+
Merged-chr11-10779738-1	chr11	10779701	10779775	+	0	{'ENST00000361367.7': '3UTR'}	{'ENST00000361367.7': 'protein_coding'}	{'ENST00000361367.7': 45}	{'ENST00000361367.7': 'chr11'}	{'ENST00000361367.7': 10779103.0}	{'ENST00000361367.7': 10779746.0}	{'ENST00000361367.7': '+'}	ENST00000361367.7	3UTR	protein_coding	45	chr11	10779103	10779746	+	['ENST00000361367.7']	['ENST00000361367.7']	ENST00000361367.7	3UTR	protein_coding	45	chr11	10779103	10779746	+	[]	['ENST00000361367.7']	ENST00000361367.7	3UTR	protein_coding	45	chr11	10779103	10779746	+	ENST00000361367.7	3UTR	protein_coding	45	chr11	10779103	10779746	+
Merged-chr11-32141309-1	chr11	32141272	32141346	-	0	{'ENST00000525133.2': 'Intron', 'ENST00000419556.2': 'Intron'}	{'ENST00000525133.2': 'lncRNA', 'ENST00000419556.2': 'transcribed_unitary_pseudogene'}	{'ENST00000525133.2': 74, 'ENST00000419556.2': 74}	{'ENST00000525133.2': 'chr11', 'ENST00000419556.2': 'chr11'}	{'ENST00000525133.2': 32137242.0, 'ENST00000419556.2': 32112428.0}	{'ENST00000525133.2': 32143143.0, 'ENST00000419556.2': 32230119.0}	{'ENST00000525133.2': '+', 'ENST00000419556.2': '-'}	ENST00000525133.2	Intron	lncRNA	74	chr11	32137242	32143143	+	['ENST00000525133.2', 'ENST00000419556.2']	[]	ENST00000525133.2	Intron	lncRNA	74	chr11	32137242	32143143	+	[]	[]	ENST00000525133.2	Intron	lncRNA	74	chr11	32137242	32143143	+	ENST00000525133.2	Intron	lncRNA	74	chr11	32137242	32143143	+
Merged-chr11-34101149-1	chr11	34101112	34101186	+	0	{'ENST00000341394.9': '3UTR'}	{'ENST00000341394.9': 'protein_coding'}	{'ENST00000341394.9': 74}	{'ENST00000341394.9': 'chr11'}	{'ENST00000341394.9': 34099365.0}	{'ENST00000341394.9': 34102610.0}	{'ENST00000341394.9': '+'}	ENST00000341394.9	3UTR	protein_coding	74	chr11	34099365	34102610	+	['ENST00000341394.9']	['ENST00000341394.9']	ENST00000341394.9	3UTR	protein_coding	74	chr11	34099365	34102610	+	[]	['ENST00000341394.9']	ENST00000341394.9	3UTR	protein_coding	74	chr11	34099365	34102610	+	ENST00000341394.9	3UTR	protein_coding	74	chr11	34099365	34102610	+
Merged-chr19-18170517-1	chr19	18170480	18170554	+	0	{'ENST00000593731.1': 'AltUTR', 'ENST00000222254.13': '3UTR'}	{'ENST00000593731.1': 'protein_coding', 'ENST00000222254.13': 'protein_coding'}	{'ENST00000593731.1': 14, 'ENST00000222254.13': 52}	{'ENST00000593731.1': 'chr19', 'ENST00000222254.13': 'chr19'}	{'ENST00000593731.1': 18169292.0, 'ENST00000222254.13': 18169292.0}	{'ENST00000593731.1': 18170494.0, 'ENST00000222254.13': 18170532.0}	{'ENST00000593731.1': '+', 'ENST00000222254.13': '+'}	ENST00000222254.13	3UTR	protein_coding	52	chr19	18169292	18170532	+	['ENST00000593731.1', 'ENST00000222254.13']	['ENST00000222254.13']	ENST00000222254.13	3UTR	protein_coding	52	chr19	18169292	18170532	+	[]	['ENST00000222254.13']	ENST00000222254.13	3UTR	protein_coding	52	chr19	18169292	18170532	+	ENST00000222254.13	3UTR	protein_coding	52	chr19	18169292	18170532	+
Merged-chr19-18434840-1	chr19	18434803	18434877	-	0	{'ENST00000338128.13': '3UTR', 'ENST00000457269.8': '3UTR', 'ENST00000578963.5': '3UTR'}	{'ENST00000338128.13': 'protein_coding', 'ENST00000457269.8': 'protein_coding', 'ENST00000578963.5': 'protein_coding'}	{'ENST00000338128.13': 74, 'ENST00000457269.8': 69, 'ENST00000578963.5': 57}	{'ENST00000338128.13': 'chr19', 'ENST00000457269.8': 'chr19', 'ENST00000578963.5': 'chr19'}	{'ENST00000338128.13': 18434388.0, 'ENST00000457269.8': 18434809.0, 'ENST00000578963.5': 18434821.0}	{'ENST00000338128.13': 18434915.0, 'ENST00000457269.8': 18434915.0, 'ENST00000578963.5': 18434915.0}	{'ENST00000338128.13': '-', 'ENST00000457269.8': '-', 'ENST00000578963.5': '-'}	ENST00000338128.13	3UTR	protein_coding	74	chr19	18434388	18434915	-	['ENST00000338128.13', 'ENST00000457269.8', 'ENST00000578963.5']	['ENST00000338128.13']	ENST00000338128.13	3UTR	protein_coding	74	chr19	18434388	18434915	-	[]	['ENST00000338128.13', 'ENST00000457269.8', 'ENST00000578963.5']	ENST00000338128.13	3UTR	protein_coding	74	chr19	18434388	18434915	-	ENST00000338128.13	3UTR	protein_coding	74	chr19	18434388	18434915	-
Merged-chr19-35540748-1	chr19	35540711	35540785	-	0	{'ENST00000222286.9': 'Intron'}	{'ENST00000222286.9': 'protein_coding'}	{'ENST00000222286.9': 74}	{'ENST00000222286.9': 'chr19'}	{'ENST00000222286.9': 35538683.0}	{'ENST00000222286.9': 35542318.0}	{'ENST00000222286.9': '+'}	ENST00000222286.9	Intron	protein_coding	74	chr19	35538683	35542318	+	['ENST00000222286.9']	['ENST00000222286.9']	ENST00000222286.9	Intron	protein_coding	74	chr19	35538683	35542318	+	[]	[]	ENST00000222286.9	Intron	protein_coding	74	chr19	35538683	35542318	+	ENST00000222286.9	Intron	protein_coding	74	chr19	35538683	35542318	+
Merged-chr19-45409619-1	chr19	45409582	45409656	-	0	{'ENST00000309424.8': '3UTR', 'ENST00000589804.1': '3UTR', 'ENST00000300853.8': '3UTR', 'ENST00000340192.11': '3UTR', 'ENST00000591636.5': '3UTR'}	{'ENST00000309424.8': 'protein_coding', 'ENST00000589804.1': 'protein_coding', 'ENST00000300853.8': 'protein_coding', 'ENST00000340192.11': 'protein_coding', 'ENST00000591636.5': 'protein_coding'}	{'ENST00000309424.8': 74, 'ENST00000589804.1': 74, 'ENST00000300853.8': 74, 'ENST00000340192.11': 43, 'ENST00000591636.5': 38}	{'ENST00000309424.8': 'chr19', 'ENST00000589804.1': 'chr19', 'ENST00000300853.8': 'chr19', 'ENST00000340192.11': 'chr19', 'ENST00000591636.5': 'chr19'}	{'ENST00000309424.8': 45409499.0, 'ENST00000589804.1': 45409499.0, 'ENST00000300853.8': 45407334.0, 'ENST00000340192.11': 45409614.0, 'ENST00000591636.5': 45409619.0}	{'ENST00000309424.8': 45410737.0, 'ENST00000589804.1': 45409786.0, 'ENST00000300853.8': 45409677.0, 'ENST00000340192.11': 45409677.0, 'ENST00000591636.5': 45409688.0}	{'ENST00000309424.8': '+', 'ENST00000589804.1': '+', 'ENST00000300853.8': '-', 'ENST00000340192.11': '-', 'ENST00000591636.5': '-'}	ENST00000309424.8	3UTR	protein_coding	74	chr19	45409499	45410737	+	['ENST00000309424.8', 'ENST00000589804.1', 'ENST00000300853.8', 'ENST00000340192.11', 'ENST00000591636.5']	['ENST00000309424.8', 'ENST00000300853.8']	ENST00000309424.8	3UTR	protein_coding	74	chr19	45409499	45410737	+	[]	['ENST00000309424.8', 'ENST00000589804.1', 'ENST00000300853.8', 'ENST00000340192.11', 'ENST00000591636.5']	ENST00000309424.8	3UTR	protein_coding	74	chr19	45409499	45410737	+	ENST00000309424.8	3UTR	protein_coding	74	chr19	45409499	45410737	+
Merged-chr19-47004530-1	chr19	47004493	47004567	+	0	{'ENST00000672722.1': '3UTR'}	{'ENST00000672722.1': 'protein_coding'}	{'ENST00000672722.1': 74}	{'ENST00000672722.1': 'chr19'}	{'ENST00000672722.1': 47000686.0}	{'ENST00000672722.1': 47005077.0}	{'ENST00000672722.1': '+'}	ENST00000672722.1	3UTR	protein_coding	74	chr19	47000686	47005077	+	['ENST00000672722.1']	['ENST00000672722.1']	ENST00000672722.1	3UTR	protein_coding	74	chr19	47000686	47005077	+	[]	['ENST00000672722.1']	ENST00000672722.1	3UTR	protein_coding	74	chr19	47000686	47005077	+	ENST00000672722.1	3UTR	protein_coding	74	chr19	47000686	47005077	+
Merged-chr19-5678422-1	chr19	5678385	5678459	-	0	{'ENST00000587950.5': '3UTR', 'ENST00000579649.5': 'Intron'}	{'ENST00000587950.5': 'protein_coding', 'ENST00000579649.5': 'protein_coding'}	{'ENST00000587950.5': 38, 'ENST00000579649.5': 74}	{'ENST00000587950.5': 'chr19', 'ENST00000579649.5': 'chr19'}	{'ENST00000587950.5': 5678422.0, 'ENST00000579649.5': 5674972.0}	{'ENST00000587950.5': 5678553.0, 'ENST00000579649.5': 5690332.0}	{'ENST00000587950.5': '-', 'ENST00000579649.5': '+'}	ENST00000579649.5	Intron	protein_coding	74	chr19	5674972	5690332	+	['ENST00000587950.5', 'ENST00000579649.5']	[]	ENST00000579649.5	Intron	protein_coding	74	chr19	5674972	5690332	+	[]	['ENST00000587950.5']	ENST00000587950.5	3UTR	protein_coding	38	chr19	5678422	5678553	-	ENST00000579649.5	Intron	protein_coding	74	chr19	5674972	5690332	+
Merged-chr19-6379593-1	chr19	6379556	6379630	-	0	{'ENST00000394456.10': '3UTR'}	{'ENST00000394456.10': 'protein_coding'}	{'ENST00000394456.10': 59}	{'ENST00000394456.10': 'chr19'}	{'ENST00000394456.10': 6379572.0}	{'ENST00000394456.10': 6380283.0}	{'ENST00000394456.10': '-'}	ENST00000394456.10	3UTR	protein_coding	59	chr19	6379572	6380283	-	['ENST00000394456.10']	['ENST00000394456.10']	ENST00000394456.10	3UTR	protein_coding	59	chr19	6379572	6380283	-	[]	['ENST00000394456.10']	ENST00000394456.10	3UTR	protein_coding	59	chr19	6379572	6380283	-	ENST00000394456.10	3UTR	protein_coding	59	chr19	6379572	6380283	-
Merged-chr6-98837124-1	chr6	98837087	98837161	+	0	{'ENST00000328345.8': '3UTR'}	{'ENST00000328345.8': 'protein_coding'}	{'ENST00000328345.8': 74}	{'ENST00000328345.8': 'chr6'}	{'ENST00000328345.8': 98836203.0}	{'ENST00000328345.8': 98839458.0}	{'ENST00000328345.8': '+'}	ENST00000328345.8	3UTR	protein_coding	74	chr6	98836203	98839458	+	['ENST00000328345.8']	['ENST00000328345.8']	ENST00000328345.8	3UTR	protein_coding	74	chr6	98836203	98839458	+	[]	['ENST00000328345.8']	ENST00000328345.8	3UTR	protein_coding	74	chr6	98836203	98839458	+	ENST00000328345.8	3UTR	protein_coding	74	chr6	98836203	98839458	+
Merged-chr6-3268983-1	chr6	3268946	3269020	-	0	{'ENST00000436008.6': '3UTR', 'ENST00000406686.8': '3UTR', 'ENST00000451246.2': 'Intron'}	{'ENST00000436008.6': 'protein_coding', 'ENST00000406686.8': 'protein_coding', 'ENST00000451246.2': 'protein_coding'}	{'ENST00000436008.6': 59, 'ENST00000406686.8': 48, 'ENST00000451246.2': 74}	{'ENST00000436008.6': 'chr6', 'ENST00000406686.8': 'chr6', 'ENST00000451246.2': 'chr6'}	{'ENST00000436008.6': 3268962.0, 'ENST00000406686.8': 3268973.0, 'ENST00000451246.2': 3259196.0}	{'ENST00000436008.6': 3273057.0, 'ENST00000406686.8': 3273057.0, 'ENST00000451246.2': 3282235.0}	{'ENST00000436008.6': '-', 'ENST00000406686.8': '-', 'ENST00000451246.2': '+'}	ENST00000451246.2	Intron	protein_coding	74	chr6	3259196	3282235	+	['ENST00000436008.6', 'ENST00000406686.8', 'ENST00000451246.2']	['ENST00000406686.8']	ENST00000406686.8	3UTR	protein_coding	48	chr6	3268973	3273057	-	[]	['ENST00000436008.6', 'ENST00000406686.8']	ENST00000436008.6	3UTR	protein_coding	59	chr6	3268962	3273057	-	ENST00000406686.8	3UTR	protein_coding	48	chr6	3268973	3273057	-
Merged-chr6-7881525-1	chr6	7881488	7881562	-	0	{'ENST00000379757.9': '3UTR', 'ENST00000439343.2': 'exon', 'ENST00000283147.7': '3UTR'}	{'ENST00000379757.9': 'protein_coding', 'ENST00000439343.2': 'protein_coding', 'ENST00000283147.7': 'protein_coding'}	{'ENST00000379757.9': 46, 'ENST00000439343.2': 41, 'ENST00000283147.7': 74}	{'ENST00000379757.9': 'chr6', 'ENST00000439343.2': 'chr6', 'ENST00000283147.7': 'chr6'}	{'ENST00000379757.9': 7881517.0, 'ENST00000439343.2': 7881522.0, 'ENST00000283147.7': 7880341.0}	{'ENST00000379757.9': 7883146.0, 'ENST00000439343.2': 7883266.0, 'ENST00000283147.7': 7881728.0}	{'ENST00000379757.9': '-', 'ENST00000439343.2': '-', 'ENST00000283147.7': '+'}	ENST00000283147.7	3UTR	protein_coding	74	chr6	7880341	7881728	+	['ENST00000379757.9', 'ENST00000439343.2', 'ENST00000283147.7']	['ENST00000379757.9', 'ENST00000283147.7']	ENST00000283147.7	3UTR	protein_coding	74	chr6	7880341	7881728	+	[]	['ENST00000379757.9', 'ENST00000283147.7']	ENST00000283147.7	3UTR	protein_coding	74	chr6	7880341	7881728	+	ENST00000283147.7	3UTR	protein_coding	74	chr6	7880341	7881728	+
Merged-chr6-19842191-1	chr6	19842154	19842228	+	0	{'ENST00000378700.8': 'exon'}	{'ENST00000378700.8': 'protein_coding'}	{'ENST00000378700.8': 43}	{'ENST00000378700.8': 'chr6'}	{'ENST00000378700.8': 19839210.0}	{'ENST00000378700.8': 19842197.0}	{'ENST00000378700.8': '+'}	ENST00000378700.8	exon	protein_coding	43	chr6	19839210	19842197	+	['ENST00000378700.8']	['ENST00000378700.8']	ENST00000378700.8	exon	protein_coding	43	chr6	19839210	19842197	+	[]	[]	ENST00000378700.8	exon	protein_coding	43	chr6	19839210	19842197	+	ENST00000378700.8	exon	protein_coding	43	chr6	19839210	19842197	+
Merged-chr19-11553053-1	chr19	11553016	11553090	-	0	{'ENST00000252445.8': '3UTR', 'ENST00000587806.5': '3UTR', 'ENST00000586683.5': 'Intron'}	{'ENST00000252445.8': 'protein_coding', 'ENST00000587806.5': 'protein_coding', 'ENST00000586683.5': 'protein_coding'}	{'ENST00000252445.8': 45, 'ENST00000587806.5': 44, 'ENST00000586683.5': 36}	{'ENST00000252445.8': 'chr19', 'ENST00000587806.5': 'chr19', 'ENST00000586683.5': 'chr19'}	{'ENST00000252445.8': 11553046.0, 'ENST00000587806.5': 11553047.0, 'ENST00000586683.5': 11553055.0}	{'ENST00000252445.8': 11553748.0, 'ENST00000587806.5': 11553748.0, 'ENST00000586683.5': 11554010.0}	{'ENST00000252445.8': '-', 'ENST00000587806.5': '-', 'ENST00000586683.5': '-'}	ENST00000252445.8	3UTR	protein_coding	45	chr19	11553046	11553748	-	['ENST00000252445.8', 'ENST00000587806.5', 'ENST00000586683.5']	[]	ENST00000252445.8	3UTR	protein_coding	45	chr19	11553046	11553748	-	[]	['ENST00000252445.8', 'ENST00000587806.5']	ENST00000252445.8	3UTR	protein_coding	45	chr19	11553046	11553748	-	ENST00000252445.8	3UTR	protein_coding	45	chr19	11553046	11553748	-
Merged-chr19-13154812-1	chr19	13154775	13154849	+	0	{'ENST00000292433.4': '3UTR', 'ENST00000588173.1': '3UTR'}	{'ENST00000292433.4': 'protein_coding', 'ENST00000588173.1': 'protein_coding'}	{'ENST00000292433.4': 74, 'ENST00000588173.1': 74}	{'ENST00000292433.4': 'chr19', 'ENST00000588173.1': 'chr19'}	{'ENST00000292433.4': 13153856.0, 'ENST00000588173.1': 13153856.0}	{'ENST00000292433.4': 13154911.0, 'ENST00000588173.1': 13154908.0}	{'ENST00000292433.4': '+', 'ENST00000588173.1': '+'}	ENST00000292433.4	3UTR	protein_coding	74	chr19	13153856	13154911	+	['ENST00000292433.4', 'ENST00000588173.1']	['ENST00000292433.4']	ENST00000292433.4	3UTR	protein_coding	74	chr19	13153856	13154911	+	[]	['ENST00000292433.4', 'ENST00000588173.1']	ENST00000292433.4	3UTR	protein_coding	74	chr19	13153856	13154911	+	ENST00000292433.4	3UTR	protein_coding	74	chr19	13153856	13154911	+
Merged-chr19-14006112-1	chr19	14006075	14006149	-	0	{'ENST00000254325.9': 'Intron'}	{'ENST00000254325.9': 'protein_coding'}	{'ENST00000254325.9': 27}	{'ENST00000254325.9': 'chr19'}	{'ENST00000254325.9': 13993895.0}	{'ENST00000254325.9': 14006102.0}	{'ENST00000254325.9': '-'}	ENST00000254325.9	Intron	protein_coding	27	chr19	13993895	14006102	-	['ENST00000254325.9']	['ENST00000254325.9']	ENST00000254325.9	Intron	protein_coding	27	chr19	13993895	14006102	-	[]	[]	ENST00000254325.9	Intron	protein_coding	27	chr19	13993895	14006102	-	ENST00000254325.9	Intron	protein_coding	27	chr19	13993895	14006102	-
Merged-chr19-17734498-1	chr19	17734461	17734535	+	0	{'ENST00000324096.9': '3UTR', 'ENST00000544059.2': '3UTR', 'ENST00000595363.1': 'exon'}	{'ENST00000324096.9': 'protein_coding', 'ENST00000544059.2': 'protein_coding', 'ENST00000595363.1': 'lncRNA'}	{'ENST00000324096.9': 52, 'ENST00000544059.2': 29, 'ENST00000595363.1': 52}	{'ENST00000324096.9': 'chr19', 'ENST00000544059.2': 'chr19', 'ENST00000595363.1': 'chr19'}	{'ENST00000324096.9': 17734426.0, 'ENST00000544059.2': 17734426.0, 'ENST00000595363.1': 17734442.0}	{'ENST00000324096.9': 17734513.0, 'ENST00000544059.2': 17734490.0, 'ENST00000595363.1': 17734513.0}	{'ENST00000324096.9': '+', 'ENST00000544059.2': '+', 'ENST00000595363.1': '-'}	ENST00000595363.1	exon	lncRNA	52	chr19	17734442	17734513	-	['ENST00000324096.9', 'ENST00000544059.2', 'ENST00000595363.1']	['ENST00000324096.9']	ENST00000324096.9	3UTR	protein_coding	52	chr19	17734426	17734513	+	[]	['ENST00000324096.9', 'ENST00000544059.2']	ENST00000324096.9	3UTR	protein_coding	52	chr19	17734426	17734513	+	ENST00000324096.9	3UTR	protein_coding	52	chr19	17734426	17734513	+
Merged-chr19-19623671-1	chr19	19623634	19623708	-	0	{'ENST00000407877.8': '3UTR', 'ENST00000586703.1': '3UTR', 'ENST00000542587.5': '3UTR'}	{'ENST00000407877.8': 'protein_coding', 'ENST00000586703.1': 'protein_coding', 'ENST00000542587.5': 'protein_coding'}	{'ENST00000407877.8': 54, 'ENST00000586703.1': 41, 'ENST00000542587.5': 40}	{'ENST00000407877.8': 'chr19', 'ENST00000586703.1': 'chr19', 'ENST00000542587.5': 'chr19'}	{'ENST00000407877.8': 19623655.0, 'ENST00000586703.1': 19623668.0, 'ENST00000542587.5': 19623669.0}	{'ENST00000407877.8': 19624258.0, 'ENST00000586703.1': 19624258.0, 'ENST00000542587.5': 19624258.0}	{'ENST00000407877.8': '-', 'ENST00000586703.1': '-', 'ENST00000542587.5': '-'}	ENST00000407877.8	3UTR	protein_coding	54	chr19	19623655	19624258	-	['ENST00000407877.8', 'ENST00000586703.1', 'ENST00000542587.5']	['ENST00000407877.8']	ENST00000407877.8	3UTR	protein_coding	54	chr19	19623655	19624258	-	[]	['ENST00000407877.8', 'ENST00000586703.1', 'ENST00000542587.5']	ENST00000407877.8	3UTR	protein_coding	54	chr19	19623655	19624258	-	ENST00000407877.8	3UTR	protein_coding	54	chr19	19623655	19624258	-
Merged-chr6-44254130-1	chr6	44254093	44254167	-	0	{'ENST00000393810.5': '3UTR', 'ENST00000393812.4': '3UTR', 'ENST00000537814.2': '3UTR'}	{'ENST00000393810.5': 'protein_coding', 'ENST00000393812.4': 'protein_coding', 'ENST00000537814.2': 'protein_coding'}	{'ENST00000393810.5': 72, 'ENST00000393812.4': 67, 'ENST00000537814.2': 66}	{'ENST00000393810.5': 'chr6', 'ENST00000393812.4': 'chr6', 'ENST00000537814.2': 'chr6'}	{'ENST00000393810.5': 44254096.0, 'ENST00000393812.4': 44254101.0, 'ENST00000537814.2': 44254102.0}	{'ENST00000393810.5': 44255567.0, 'ENST00000393812.4': 44254708.0, 'ENST00000537814.2': 44254708.0}	{'ENST00000393810.5': '-', 'ENST00000393812.4': '-', 'ENST00000537814.2': '-'}	ENST00000393810.5	3UTR	protein_coding	72	chr6	44254096	44255567	-	['ENST00000393810.5', 'ENST00000393812.4', 'ENST00000537814.2']	['ENST00000393812.4']	ENST00000393812.4	3UTR	protein_coding	67	chr6	44254101	44254708	-	[]	['ENST00000393810.5', 'ENST00000393812.4', 'ENST00000537814.2']	ENST00000393810.5	3UTR	protein_coding	72	chr6	44254096	44255567	-	ENST00000393812.4	3UTR	protein_coding	67	chr6	44254101	44254708	-
Merged-chr6-113861594-1	chr6	113861557	113861631	+	0	{'ENST00000612661.2': '3UTR'}	{'ENST00000612661.2': 'protein_coding'}	{'ENST00000612661.2': 74}	{'ENST00000612661.2': 'chr6'}	{'ENST00000612661.2': 113860577.0}	{'ENST00000612661.2': 113863475.0}	{'ENST00000612661.2': '+'}	ENST00000612661.2	3UTR	protein_coding	74	chr6	113860577	113863475	+	['ENST00000612661.2']	['ENST00000612661.2']	ENST00000612661.2	3UTR	protein_coding	74	chr6	113860577	113863475	+	[]	['ENST00000612661.2']	ENST00000612661.2	3UTR	protein_coding	74	chr6	113860577	113863475	+	ENST00000612661.2	3UTR	protein_coding	74	chr6	113860577	113863475	+
Merged-chr19-44878917-1	chr19	44878880	44878954	+	0	{'ENST00000252485.8': '3UTR', 'ENST00000252483.10': 'Intron'}	{'ENST00000252485.8': 'protein_coding', 'ENST00000252483.10': 'protein_coding'}	{'ENST00000252485.8': 61, 'ENST00000252483.10': 74}	{'ENST00000252485.8': 'chr19', 'ENST00000252483.10': 'chr19'}	{'ENST00000252485.8': 44878618.0, 'ENST00000252483.10': 44874478.0}	{'ENST00000252485.8': 44878941.0, 'ENST00000252483.10': 44882210.0}	{'ENST00000252485.8': '+', 'ENST00000252483.10': '+'}	ENST00000252483.10	Intron	protein_coding	74	chr19	44874478	44882210	+	['ENST00000252485.8', 'ENST00000252483.10']	['ENST00000252483.10']	ENST00000252483.10	Intron	protein_coding	74	chr19	44874478	44882210	+	[]	['ENST00000252485.8']	ENST00000252485.8	3UTR	protein_coding	61	chr19	44878618	44878941	+	ENST00000252483.10	Intron	protein_coding	74	chr19	44874478	44882210	+
Merged-chr6-121447161-1	chr6	121447124	121447198	+	0	{'ENST00000649003.1': 'CDS', 'ENST00000282561.4': 'exon', 'ENST00000650427.1': 'exon', 'ENST00000647564.1': 'exon'}	{'ENST00000649003.1': 'protein_coding', 'ENST00000282561.4': 'protein_coding', 'ENST00000650427.1': 'protein_coding', 'ENST00000647564.1': 'protein_coding'}	{'ENST00000649003.1': 74, 'ENST00000282561.4': 74, 'ENST00000650427.1': 74, 'ENST00000647564.1': 74}	{'ENST00000649003.1': 'chr6', 'ENST00000282561.4': 'chr6', 'ENST00000650427.1': 'chr6', 'ENST00000647564.1': 'chr6'}	{'ENST00000649003.1': 121446848.0, 'ENST00000282561.4': 121446832.0, 'ENST00000650427.1': 121446832.0, 'ENST00000647564.1': 121446832.0}	{'ENST00000649003.1': 121447993.0, 'ENST00000282561.4': 121449727.0, 'ENST00000650427.1': 121449705.0, 'ENST00000647564.1': 121448812.0}	{'ENST00000649003.1': '+', 'ENST00000282561.4': '+', 'ENST00000650427.1': '+', 'ENST00000647564.1': '+'}	ENST00000649003.1	CDS	protein_coding	74	chr6	121446848	121447993	+	['ENST00000649003.1', 'ENST00000282561.4', 'ENST00000650427.1', 'ENST00000647564.1']	['ENST00000282561.4']	ENST00000282561.4	exon	protein_coding	74	chr6	121446832	121449727	+	[]	[]	ENST00000282561.4	exon	protein_coding	74	chr6	121446832	121449727	+	ENST00000282561.4	exon	protein_coding	74	chr6	121446832	121449727	+
Merged-chr6-26217217-1	chr6	26217180	26217254	+	0	{'ENST00000303910.5': 'CDS', 'ENST00000707189.1': 'Intron', 'ENST00000707191.1': 'Intron'}	{'ENST00000303910.5': 'protein_coding', 'ENST00000707189.1': 'TEC', 'ENST00000707191.1': 'TEC'}	{'ENST00000303910.5': 74, 'ENST00000707189.1': 74, 'ENST00000707191.1': 74}	{'ENST00000303910.5': 'chr6', 'ENST00000707189.1': 'chr6', 'ENST00000707191.1': 'chr6'}	{'ENST00000303910.5': 26216975.0, 'ENST00000707189.1': 26124171.0, 'ENST00000707191.1': 26158121.0}	{'ENST00000303910.5': 26217364.0, 'ENST00000707189.1': 26553186.0, 'ENST00000707191.1': 26532704.0}	{'ENST00000303910.5': '+', 'ENST00000707189.1': '+', 'ENST00000707191.1': '+'}	ENST00000303910.5	CDS	protein_coding	74	chr6	26216975	26217364	+	['ENST00000303910.5', 'ENST00000707189.1', 'ENST00000707191.1']	[]	ENST00000303910.5	CDS	protein_coding	74	chr6	26216975	26217364	+	[]	[]	ENST00000303910.5	CDS	protein_coding	74	chr6	26216975	26217364	+	ENST00000303910.5	CDS	protein_coding	74	chr6	26216975	26217364	+
Merged-chr19-48961798-1	chr19	48961761	48961835	+	0	{'ENST00000345358.12': '3UTR', 'ENST00000293288.12': '3UTR'}	{'ENST00000345358.12': 'protein_coding', 'ENST00000293288.12': 'protein_coding'}	{'ENST00000345358.12': 37, 'ENST00000293288.12': 37}	{'ENST00000345358.12': 'chr19', 'ENST00000293288.12': 'chr19'}	{'ENST00000345358.12': 48961634.0, 'ENST00000293288.12': 48961095.0}	{'ENST00000345358.12': 48961798.0, 'ENST00000293288.12': 48961798.0}	{'ENST00000345358.12': '+', 'ENST00000293288.12': '+'}	ENST00000345358.12	3UTR	protein_coding	37	chr19	48961634	48961798	+	['ENST00000345358.12', 'ENST00000293288.12']	['ENST00000345358.12']	ENST00000345358.12	3UTR	protein_coding	37	chr19	48961634	48961798	+	[]	['ENST00000345358.12', 'ENST00000293288.12']	ENST00000345358.12	3UTR	protein_coding	37	chr19	48961634	48961798	+	ENST00000345358.12	3UTR	protein_coding	37	chr19	48961634	48961798	+
Merged-chr19-49658624-1	chr19	49658587	49658661	+	0	{'ENST00000360565.8': '3UTR'}	{'ENST00000360565.8': 'protein_coding'}	{'ENST00000360565.8': 55}	{'ENST00000360565.8': 'chr19'}	{'ENST00000360565.8': 49658397.0}	{'ENST00000360565.8': 49658642.0}	{'ENST00000360565.8': '+'}	ENST00000360565.8	3UTR	protein_coding	55	chr19	49658397	49658642	+	['ENST00000360565.8']	['ENST00000360565.8']	ENST00000360565.8	3UTR	protein_coding	55	chr19	49658397	49658642	+	[]	['ENST00000360565.8']	ENST00000360565.8	3UTR	protein_coding	55	chr19	49658397	49658642	+	ENST00000360565.8	3UTR	protein_coding	55	chr19	49658397	49658642	+
Merged-chr19-1228417-1	chr19	1228380	1228454	+	0	{'ENST00000326873.12': 'exon', 'ENST00000650044.2': '3UTR', 'ENST00000590083.5': '3UTR'}	{'ENST00000326873.12': 'protein_coding', 'ENST00000650044.2': 'protein_coding', 'ENST00000590083.5': 'protein_coding'}	{'ENST00000326873.12': 51, 'ENST00000650044.2': 74, 'ENST00000590083.5': 74}	{'ENST00000326873.12': 'chr19', 'ENST00000650044.2': 'chr19', 'ENST00000590083.5': 'chr19'}	{'ENST00000326873.12': 1227593.0, 'ENST00000650044.2': 1228287.0, 'ENST00000590083.5': 1228287.0}	{'ENST00000326873.12': 1228431.0, 'ENST00000650044.2': 1229181.0, 'ENST00000590083.5': 1230895.0}	{'ENST00000326873.12': '+', 'ENST00000650044.2': '-', 'ENST00000590083.5': '-'}	ENST00000650044.2	3UTR	protein_coding	74	chr19	1228287	1229181	-	['ENST00000326873.12', 'ENST00000650044.2', 'ENST00000590083.5']	['ENST00000326873.12', 'ENST00000650044.2']	ENST00000650044.2	3UTR	protein_coding	74	chr19	1228287	1229181	-	[]	['ENST00000650044.2', 'ENST00000590083.5']	ENST00000650044.2	3UTR	protein_coding	74	chr19	1228287	1229181	-	ENST00000650044.2	3UTR	protein_coding	74	chr19	1228287	1229181	-
Merged-chr19-1598049-1	chr19	1598012	1598086	-	0	{'ENST00000591899.8': 'exon', 'ENST00000589880.1': 'exon', 'ENST00000585937.1': 'Intron'}	{'ENST00000591899.8': 'protein_coding', 'ENST00000589880.1': 'protein_coding', 'ENST00000585937.1': 'protein_coding'}	{'ENST00000591899.8': 74, 'ENST00000589880.1': 38, 'ENST00000585937.1': 74}	{'ENST00000591899.8': 'chr19', 'ENST00000589880.1': 'chr19', 'ENST00000585937.1': 'chr19'}	{'ENST00000591899.8': 1597169.0, 'ENST00000589880.1': 1598049.0, 'ENST00000585937.1': 1585214.0}	{'ENST00000591899.8': 1598215.0, 'ENST00000589880.1': 1598326.0, 'ENST00000585937.1': 1599411.0}	{'ENST00000591899.8': '-', 'ENST00000589880.1': '-', 'ENST00000585937.1': '-'}	ENST00000591899.8	exon	protein_coding	74	chr19	1597169	1598215	-	['ENST00000591899.8', 'ENST00000589880.1', 'ENST00000585937.1']	['ENST00000591899.8']	ENST00000591899.8	exon	protein_coding	74	chr19	1597169	1598215	-	[]	[]	ENST00000591899.8	exon	protein_coding	74	chr19	1597169	1598215	-	ENST00000591899.8	exon	protein_coding	74	chr19	1597169	1598215	-
Merged-chr6-79201260-1	chr6	79201223	79201297	-	0	{'ENST00000703810.2': '3UTR', 'ENST00000706657.1': '3UTR', 'ENST00000706659.1': '3UTR'}	{'ENST00000703810.2': 'protein_coding', 'ENST00000706657.1': 'protein_coding', 'ENST00000706659.1': 'protein_coding'}	{'ENST00000703810.2': 53, 'ENST00000706657.1': 53, 'ENST00000706659.1': 45}	{'ENST00000703810.2': 'chr6', 'ENST00000706657.1': 'chr6', 'ENST00000706659.1': 'chr6'}	{'ENST00000703810.2': 79201245.0, 'ENST00000706657.1': 79201245.0, 'ENST00000706659.1': 79201253.0}	{'ENST00000703810.2': 79201690.0, 'ENST00000706657.1': 79201715.0, 'ENST00000706659.1': 79201707.0}	{'ENST00000703810.2': '-', 'ENST00000706657.1': '-', 'ENST00000706659.1': '-'}	ENST00000703810.2	3UTR	protein_coding	53	chr6	79201245	79201690	-	['ENST00000703810.2', 'ENST00000706657.1', 'ENST00000706659.1']	[]	ENST00000703810.2	3UTR	protein_coding	53	chr6	79201245	79201690	-	[]	['ENST00000703810.2', 'ENST00000706657.1', 'ENST00000706659.1']	ENST00000703810.2	3UTR	protein_coding	53	chr6	79201245	79201690	-	ENST00000703810.2	3UTR	protein_coding	53	chr6	79201245	79201690	-
Merged-chr6-80346255-1	chr6	80346218	80346292	+	0	{'ENST00000356489.9': 'exon', 'ENST00000320393.9': '3UTR'}	{'ENST00000356489.9': 'protein_coding', 'ENST00000320393.9': 'protein_coding'}	{'ENST00000356489.9': 36, 'ENST00000320393.9': 52}	{'ENST00000356489.9': 'chr6', 'ENST00000320393.9': 'chr6'}	{'ENST00000356489.9': 80345975.0, 'ENST00000320393.9': 80343802.0}	{'ENST00000356489.9': 80346254.0, 'ENST00000320393.9': 80346270.0}	{'ENST00000356489.9': '+', 'ENST00000320393.9': '+'}	ENST00000320393.9	3UTR	protein_coding	52	chr6	80343802	80346270	+	['ENST00000356489.9', 'ENST00000320393.9']	['ENST00000320393.9']	ENST00000320393.9	3UTR	protein_coding	52	chr6	80343802	80346270	+	[]	['ENST00000320393.9']	ENST00000320393.9	3UTR	protein_coding	52	chr6	80343802	80346270	+	ENST00000320393.9	3UTR	protein_coding	52	chr6	80343802	80346270	+
Merged-chr6-170283307-1	chr6	170283270	170283344	-	0	{'ENST00000366756.4': 'exon'}	{'ENST00000366756.4': 'protein_coding'}	{'ENST00000366756.4': 74}	{'ENST00000366756.4': 'chr6'}	{'ENST00000366756.4': 170283231.0}	{'ENST00000366756.4': 170284029.0}	{'ENST00000366756.4': '-'}	ENST00000366756.4	exon	protein_coding	74	chr6	170283231	170284029	-	['ENST00000366756.4']	['ENST00000366756.4']	ENST00000366756.4	exon	protein_coding	74	chr6	170283231	170284029	-	[]	[]	ENST00000366756.4	exon	protein_coding	74	chr6	170283231	170284029	-	ENST00000366756.4	exon	protein_coding	74	chr6	170283231	170284029	-
Merged-chr19-21379276-1	chr19	21379239	21379313	+	0	{'ENST00000311015.7': '3UTR', 'ENST00000380870.8': '3UTR', 'ENST00000683779.1': 'Intron'}	{'ENST00000311015.7': 'protein_coding', 'ENST00000380870.8': 'protein_coding', 'ENST00000683779.1': 'protein_coding'}	{'ENST00000311015.7': 61, 'ENST00000380870.8': 63, 'ENST00000683779.1': 74}	{'ENST00000311015.7': 'chr19', 'ENST00000380870.8': 'chr19', 'ENST00000683779.1': 'chr19'}	{'ENST00000311015.7': 21377481.0, 'ENST00000380870.8': 21378661.0, 'ENST00000683779.1': 21375964.0}	{'ENST00000311015.7': 21379300.0, 'ENST00000380870.8': 21379302.0, 'ENST00000683779.1': 21382865.0}	{'ENST00000311015.7': '+', 'ENST00000380870.8': '+', 'ENST00000683779.1': '+'}	ENST00000683779.1	Intron	protein_coding	74	chr19	21375964	21382865	+	['ENST00000311015.7', 'ENST00000380870.8', 'ENST00000683779.1']	['ENST00000683779.1']	ENST00000683779.1	Intron	protein_coding	74	chr19	21375964	21382865	+	[]	['ENST00000311015.7', 'ENST00000380870.8']	ENST00000380870.8	3UTR	protein_coding	63	chr19	21378661	21379302	+	ENST00000683779.1	Intron	protein_coding	74	chr19	21375964	21382865	+
Merged-chr19-42377703-1	chr19	42377666	42377740	+	0	{'ENST00000334370.8': '3UTR', 'ENST00000251268.11': '3UTR'}	{'ENST00000334370.8': 'protein_coding', 'ENST00000251268.11': 'protein_coding'}	{'ENST00000334370.8': 74, 'ENST00000251268.11': 74}	{'ENST00000334370.8': 'chr19', 'ENST00000251268.11': 'chr19'}	{'ENST00000334370.8': 42376773.0, 'ENST00000251268.11': 42376773.0}	{'ENST00000334370.8': 42378769.0, 'ENST00000251268.11': 42378765.0}	{'ENST00000334370.8': '+', 'ENST00000251268.11': '+'}	ENST00000334370.8	3UTR	protein_coding	74	chr19	42376773	42378769	+	['ENST00000334370.8', 'ENST00000251268.11']	['ENST00000251268.11']	ENST00000251268.11	3UTR	protein_coding	74	chr19	42376773	42378765	+	[]	['ENST00000334370.8', 'ENST00000251268.11']	ENST00000334370.8	3UTR	protein_coding	74	chr19	42376773	42378769	+	ENST00000251268.11	3UTR	protein_coding	74	chr19	42376773	42378765	+
Merged-chr6-31268761-1	chr6	31268724	31268798	-	0	{'ENST00000383329.7': '3UTR'}	{'ENST00000383329.7': 'protein_coding'}	{'ENST00000383329.7': 50}	{'ENST00000383329.7': 'chr6'}	{'ENST00000383329.7': 31268749.0}	{'ENST00000383329.7': 31269171.0}	{'ENST00000383329.7': '-'}	ENST00000383329.7	3UTR	protein_coding	50	chr6	31268749	31269171	-	['ENST00000383329.7']	[]	ENST00000383329.7	3UTR	protein_coding	50	chr6	31268749	31269171	-	[]	['ENST00000383329.7']	ENST00000383329.7	3UTR	protein_coding	50	chr6	31268749	31269171	-	ENST00000383329.7	3UTR	protein_coding	50	chr6	31268749	31269171	-
Merged-chr6-31353879-1	chr6	31353842	31353916	-	0	{'ENST00000412585.7': 'exon', 'ENST00000696561.1': 'exon'}	{'ENST00000412585.7': 'protein_coding', 'ENST00000696561.1': 'protein_coding'}	{'ENST00000412585.7': 42, 'ENST00000696561.1': 35}	{'ENST00000412585.7': 'chr6', 'ENST00000696561.1': 'chr6'}	{'ENST00000412585.7': 31353875.0, 'ENST00000696561.1': 31353882.0}	{'ENST00000412585.7': 31354296.0, 'ENST00000696561.1': 31354296.0}	{'ENST00000412585.7': '-', 'ENST00000696561.1': '-'}	ENST00000412585.7	exon	protein_coding	42	chr6	31353875	31354296	-	['ENST00000412585.7', 'ENST00000696561.1']	['ENST00000412585.7']	ENST00000412585.7	exon	protein_coding	42	chr6	31353875	31354296	-	[]	[]	ENST00000412585.7	exon	protein_coding	42	chr6	31353875	31354296	-	ENST00000412585.7	exon	protein_coding	42	chr6	31353875	31354296	-
Merged-chr19-58083887-1	chr19	58083850	58083924	-	0	{'ENST00000240727.10': '3UTR', 'ENST00000601144.6': '3UTR'}	{'ENST00000240727.10': 'protein_coding', 'ENST00000601144.6': 'protein_coding'}	{'ENST00000240727.10': 74, 'ENST00000601144.6': 69}	{'ENST00000240727.10': 'chr19', 'ENST00000601144.6': 'chr19'}	{'ENST00000240727.10': 58083839.0, 'ENST00000601144.6': 58083856.0}	{'ENST00000240727.10': 58084687.0, 'ENST00000601144.6': 58084687.0}	{'ENST00000240727.10': '-', 'ENST00000601144.6': '-'}	ENST00000240727.10	3UTR	protein_coding	74	chr19	58083839	58084687	-	['ENST00000240727.10', 'ENST00000601144.6']	['ENST00000601144.6']	ENST00000601144.6	3UTR	protein_coding	69	chr19	58083856	58084687	-	[]	['ENST00000240727.10', 'ENST00000601144.6']	ENST00000240727.10	3UTR	protein_coding	74	chr19	58083839	58084687	-	ENST00000601144.6	3UTR	protein_coding	69	chr19	58083856	58084687	-
Merged-chr19-58584353-1	chr19	58584353	58584353	+	0	{'ENST00000652551.1': 'Intron', 'ENST00000651608.1': 'Intron'}	{'ENST00000652551.1': 'lncRNA', 'ENST00000651608.1': 'transcribed_processed_pseudogene'}	{'ENST00000652551.1': 0, 'ENST00000651608.1': 0}	{'ENST00000652551.1': 'chr19', 'ENST00000651608.1': 'chr19'}	{'ENST00000652551.1': 58583172.0, 'ENST00000651608.1': 58583172.0}	{'ENST00000652551.1': 58586154.0, 'ENST00000651608.1': 58598966.0}	{'ENST00000652551.1': '+', 'ENST00000651608.1': '+'}	ENST00000652551.1	Intron	lncRNA	0	chr19	58583172	58586154	+	['ENST00000652551.1', 'ENST00000651608.1']	[]	ENST00000652551.1	Intron	lncRNA	0	chr19	58583172	58586154	+	[]	[]	ENST00000652551.1	Intron	lncRNA	0	chr19	58583172	58586154	+	ENST00000652551.1	Intron	lncRNA	0	chr19	58583172	58586154	+
Merged-chr19-567437-1	chr19	567400	567474	-	0	{'ENST00000590292.6': 'exon', 'ENST00000688427.2': 'Intron'}	{'ENST00000590292.6': 'lncRNA', 'ENST00000688427.2': 'lncRNA'}	{'ENST00000590292.6': 74, 'ENST00000688427.2': 55}	{'ENST00000590292.6': 'chr19', 'ENST00000688427.2': 'chr19'}	{'ENST00000590292.6': 566818.0, 'ENST00000688427.2': 562653.0}	{'ENST00000590292.6': 567624.0, 'ENST00000688427.2': 567455.0}	{'ENST00000590292.6': '-', 'ENST00000688427.2': '-'}	ENST00000590292.6	exon	lncRNA	74	chr19	566818	567624	-	['ENST00000590292.6', 'ENST00000688427.2']	[]	ENST00000590292.6	exon	lncRNA	74	chr19	566818	567624	-	[]	[]	ENST00000590292.6	exon	lncRNA	74	chr19	566818	567624	-	ENST00000590292.6	exon	lncRNA	74	chr19	566818	567624	-
Merged-chr6-37435682-1	chr6	37435645	37435719	+	0	{'ENST00000373451.9': 'CDS'}	{'ENST00000373451.9': 'protein_coding'}	{'ENST00000373451.9': 74}	{'ENST00000373451.9': 'chr6'}	{'ENST00000373451.9': 37435630.0}	{'ENST00000373451.9': 37435762.0}	{'ENST00000373451.9': '+'}	ENST00000373451.9	CDS	protein_coding	74	chr6	37435630	37435762	+	['ENST00000373451.9']	['ENST00000373451.9']	ENST00000373451.9	CDS	protein_coding	74	chr6	37435630	37435762	+	[]	[]	ENST00000373451.9	CDS	protein_coding	74	chr6	37435630	37435762	+	ENST00000373451.9	CDS	protein_coding	74	chr6	37435630	37435762	+
Merged-chr19-4502191-1	chr19	4502154	4502228	+	0	{'ENST00000616600.5': '3UTR', 'ENST00000621835.4': 'exon', 'ENST00000633942.1': '3UTR'}	{'ENST00000616600.5': 'protein_coding', 'ENST00000621835.4': 'protein_coding', 'ENST00000633942.1': 'protein_coding'}	{'ENST00000616600.5': 53, 'ENST00000621835.4': 53, 'ENST00000633942.1': 37}	{'ENST00000616600.5': 'chr19', 'ENST00000621835.4': 'chr19', 'ENST00000633942.1': 'chr19'}	{'ENST00000616600.5': 4502008.0, 'ENST00000621835.4': 4501914.0, 'ENST00000633942.1': 4502192.0}	{'ENST00000616600.5': 4502207.0, 'ENST00000621835.4': 4502207.0, 'ENST00000633942.1': 4504461.0}	{'ENST00000616600.5': '+', 'ENST00000621835.4': '+', 'ENST00000633942.1': '-'}	ENST00000616600.5	3UTR	protein_coding	53	chr19	4502008	4502207	+	['ENST00000616600.5', 'ENST00000621835.4', 'ENST00000633942.1']	['ENST00000616600.5']	ENST00000616600.5	3UTR	protein_coding	53	chr19	4502008	4502207	+	[]	['ENST00000616600.5', 'ENST00000633942.1']	ENST00000616600.5	3UTR	protein_coding	53	chr19	4502008	4502207	+	ENST00000616600.5	3UTR	protein_coding	53	chr19	4502008	4502207	+
Merged-chr19-12147684-1	chr19	12147647	12147721	-	0	{'ENST00000430024.5': 'Intron', 'ENST00000455799.1': 'Intron'}	{'ENST00000430024.5': 'protein_coding', 'ENST00000455799.1': 'protein_coding'}	{'ENST00000430024.5': 28, 'ENST00000455799.1': 32}	{'ENST00000430024.5': 'chr19', 'ENST00000455799.1': 'chr19'}	{'ENST00000430024.5': 12147455.0, 'ENST00000455799.1': 12147455.0}	{'ENST00000430024.5': 12147675.0, 'ENST00000455799.1': 12147679.0}	{'ENST00000430024.5': '-', 'ENST00000455799.1': '-'}	ENST00000455799.1	Intron	protein_coding	32	chr19	12147455	12147679	-	['ENST00000430024.5', 'ENST00000455799.1']	[]	ENST00000455799.1	Intron	protein_coding	32	chr19	12147455	12147679	-	[]	[]	ENST00000455799.1	Intron	protein_coding	32	chr19	12147455	12147679	-	ENST00000455799.1	Intron	protein_coding	32	chr19	12147455	12147679	-
Merged-chr19-12731368-1	chr19	12731331	12731405	-	0	{'ENST00000588213.1': 'AltUTR', 'ENST00000592273.5': 'Intron', 'ENST00000242784.5': 'Intron'}	{'ENST00000588213.1': 'protein_coding', 'ENST00000592273.5': 'protein_coding', 'ENST00000242784.5': 'protein_coding'}	{'ENST00000588213.1': 4, 'ENST00000592273.5': 74, 'ENST00000242784.5': 12}	{'ENST00000588213.1': 'chr19', 'ENST00000592273.5': 'chr19', 'ENST00000242784.5': 'chr19'}	{'ENST00000588213.1': 12731344.0, 'ENST00000592273.5': 12731068.0, 'ENST00000242784.5': 12731068.0}	{'ENST00000588213.1': 12731347.0, 'ENST00000592273.5': 12734312.0, 'ENST00000242784.5': 12731343.0}	{'ENST00000588213.1': '-', 'ENST00000592273.5': '-', 'ENST00000242784.5': '-'}	ENST00000592273.5	Intron	protein_coding	74	chr19	12731068	12734312	-	['ENST00000588213.1', 'ENST00000592273.5', 'ENST00000242784.5']	['ENST00000242784.5']	ENST00000242784.5	Intron	protein_coding	12	chr19	12731068	12731343	-	[]	[]	ENST00000242784.5	Intron	protein_coding	12	chr19	12731068	12731343	-	ENST00000242784.5	Intron	protein_coding	12	chr19	12731068	12731343	-
Merged-chr19-15114988-1	chr19	15114951	15115025	-	0	{'ENST00000342784.7': '3UTR', 'ENST00000600440.5': '3UTR', 'ENST00000263383.8': '3UTR', 'ENST00000534378.5': '3UTR'}	{'ENST00000342784.7': 'protein_coding', 'ENST00000600440.5': 'protein_coding', 'ENST00000263383.8': 'protein_coding', 'ENST00000534378.5': 'protein_coding'}	{'ENST00000342784.7': 23, 'ENST00000600440.5': 34, 'ENST00000263383.8': 39, 'ENST00000534378.5': 10}	{'ENST00000342784.7': 'chr19', 'ENST00000600440.5': 'chr19', 'ENST00000263383.8': 'chr19', 'ENST00000534378.5': 'chr19'}	{'ENST00000342784.7': 15113961.0, 'ENST00000600440.5': 15113961.0, 'ENST00000263383.8': 15114987.0, 'ENST00000534378.5': 15115016.0}	{'ENST00000342784.7': 15114974.0, 'ENST00000600440.5': 15114985.0, 'ENST00000263383.8': 15115254.0, 'ENST00000534378.5': 15115254.0}	{'ENST00000342784.7': '+', 'ENST00000600440.5': '+', 'ENST00000263383.8': '-', 'ENST00000534378.5': '-'}	ENST00000263383.8	3UTR	protein_coding	39	chr19	15114987	15115254	-	['ENST00000342784.7', 'ENST00000600440.5', 'ENST00000263383.8', 'ENST00000534378.5']	['ENST00000342784.7', 'ENST00000263383.8']	ENST00000263383.8	3UTR	protein_coding	39	chr19	15114987	15115254	-	[]	['ENST00000342784.7', 'ENST00000600440.5', 'ENST00000263383.8', 'ENST00000534378.5']	ENST00000263383.8	3UTR	protein_coding	39	chr19	15114987	15115254	-	ENST00000263383.8	3UTR	protein_coding	39	chr19	15114987	15115254	-
Merged-chr6-135466058-1	chr6	135466021	135466095	-	0	{'ENST00000681365.1': 'exon'}	{'ENST00000681365.1': 'protein_coding'}	{'ENST00000681365.1': 74}	{'ENST00000681365.1': 'chr6'}	{'ENST00000681365.1': 135465814.0}	{'ENST00000681365.1': 135466373.0}	{'ENST00000681365.1': '-'}	ENST00000681365.1	exon	protein_coding	74	chr6	135465814	135466373	-	['ENST00000681365.1']	[]	ENST00000681365.1	exon	protein_coding	74	chr6	135465814	135466373	-	[]	[]	ENST00000681365.1	exon	protein_coding	74	chr6	135465814	135466373	-	ENST00000681365.1	exon	protein_coding	74	chr6	135465814	135466373	-
Merged-chr6-17615039-1	chr6	17615002	17615076	-	0	{'ENST00000613258.4': '3UTR', 'ENST00000262077.3': '3UTR'}	{'ENST00000613258.4': 'protein_coding', 'ENST00000262077.3': 'protein_coding'}	{'ENST00000613258.4': 42, 'ENST00000262077.3': 40}	{'ENST00000613258.4': 'chr6', 'ENST00000262077.3': 'chr6'}	{'ENST00000613258.4': 17615035.0, 'ENST00000262077.3': 17615037.0}	{'ENST00000613258.4': 17616099.0, 'ENST00000262077.3': 17616099.0}	{'ENST00000613258.4': '-', 'ENST00000262077.3': '-'}	ENST00000613258.4	3UTR	protein_coding	42	chr6	17615035	17616099	-	['ENST00000613258.4', 'ENST00000262077.3']	['ENST00000262077.3']	ENST00000262077.3	3UTR	protein_coding	40	chr6	17615037	17616099	-	[]	['ENST00000613258.4', 'ENST00000262077.3']	ENST00000613258.4	3UTR	protein_coding	42	chr6	17615035	17616099	-	ENST00000262077.3	3UTR	protein_coding	40	chr6	17615037	17616099	-
Merged-chr6-24706124-1	chr6	24706087	24706161	-	0	{'ENST00000378119.9': '3UTR', 'ENST00000378102.3': '3UTR'}	{'ENST00000378119.9': 'protein_coding', 'ENST00000378102.3': 'protein_coding'}	{'ENST00000378119.9': 52, 'ENST00000378102.3': 44}	{'ENST00000378119.9': 'chr6', 'ENST00000378102.3': 'chr6'}	{'ENST00000378119.9': 24704861.0, 'ENST00000378102.3': 24706096.0}	{'ENST00000378119.9': 24706139.0, 'ENST00000378102.3': 24706139.0}	{'ENST00000378119.9': '-', 'ENST00000378102.3': '-'}	ENST00000378119.9	3UTR	protein_coding	52	chr6	24704861	24706139	-	['ENST00000378119.9', 'ENST00000378102.3']	['ENST00000378119.9']	ENST00000378119.9	3UTR	protein_coding	52	chr6	24704861	24706139	-	[]	['ENST00000378119.9', 'ENST00000378102.3']	ENST00000378119.9	3UTR	protein_coding	52	chr6	24704861	24706139	-	ENST00000378119.9	3UTR	protein_coding	52	chr6	24704861	24706139	-
Merged-chr19-16089124-1	chr19	16089087	16089161	+	0	{'ENST00000646974.2': 'exon'}	{'ENST00000646974.2': 'protein_coding'}	{'ENST00000646974.2': 33}	{'ENST00000646974.2': 'chr19'}	{'ENST00000646974.2': 16089045.0}	{'ENST00000646974.2': 16089120.0}	{'ENST00000646974.2': '+'}	ENST00000646974.2	exon	protein_coding	33	chr19	16089045	16089120	+	['ENST00000646974.2']	[]	ENST00000646974.2	exon	protein_coding	33	chr19	16089045	16089120	+	[]	[]	ENST00000646974.2	exon	protein_coding	33	chr19	16089045	16089120	+	ENST00000646974.2	exon	protein_coding	33	chr19	16089045	16089120	+
Merged-chr19-17209618-1	chr19	17209581	17209655	+	0	{'ENST00000682292.1': 'Intron'}	{'ENST00000682292.1': 'protein_coding'}	{'ENST00000682292.1': 4}	{'ENST00000682292.1': 'chr19'}	{'ENST00000682292.1': 17207244.0}	{'ENST00000682292.1': 17209585.0}	{'ENST00000682292.1': '+'}	ENST00000682292.1	Intron	protein_coding	4	chr19	17207244	17209585	+	['ENST00000682292.1']	['ENST00000682292.1']	ENST00000682292.1	Intron	protein_coding	4	chr19	17207244	17209585	+	[]	[]	ENST00000682292.1	Intron	protein_coding	4	chr19	17207244	17209585	+	ENST00000682292.1	Intron	protein_coding	4	chr19	17207244	17209585	+
Merged-chr19-18929201-1	chr19	18929164	18929238	-	0	{'ENST00000433218.6': '3UTR', 'ENST00000221222.15': '3UTR', 'ENST00000539827.5': 'exon', 'ENST00000594794.5': '3UTR', 'ENST00000596918.5': 'Intron'}	{'ENST00000433218.6': 'protein_coding', 'ENST00000221222.15': 'protein_coding', 'ENST00000539827.5': 'protein_coding', 'ENST00000594794.5': 'protein_coding', 'ENST00000596918.5': 'protein_coding'}	{'ENST00000433218.6': 38, 'ENST00000221222.15': 36, 'ENST00000539827.5': 36, 'ENST00000594794.5': 33, 'ENST00000596918.5': 74}	{'ENST00000433218.6': 'chr19', 'ENST00000221222.15': 'chr19', 'ENST00000539827.5': 'chr19', 'ENST00000594794.5': 'chr19', 'ENST00000596918.5': 'chr19'}	{'ENST00000433218.6': 18929201.0, 'ENST00000221222.15': 18929203.0, 'ENST00000539827.5': 18929203.0, 'ENST00000594794.5': 18929206.0, 'ENST00000596918.5': 18913046.0}	{'ENST00000433218.6': 18929445.0, 'ENST00000221222.15': 18929445.0, 'ENST00000539827.5': 18929634.0, 'ENST00000594794.5': 18929445.0, 'ENST00000596918.5': 18931324.0}	{'ENST00000433218.6': '-', 'ENST00000221222.15': '-', 'ENST00000539827.5': '-', 'ENST00000594794.5': '-', 'ENST00000596918.5': '-'}	ENST00000596918.5	Intron	protein_coding	74	chr19	18913046	18931324	-	['ENST00000433218.6', 'ENST00000221222.15', 'ENST00000539827.5', 'ENST00000594794.5', 'ENST00000596918.5']	[]	ENST00000596918.5	Intron	protein_coding	74	chr19	18913046	18931324	-	[]	['ENST00000433218.6', 'ENST00000221222.15', 'ENST00000594794.5']	ENST00000433218.6	3UTR	protein_coding	38	chr19	18929201	18929445	-	ENST00000596918.5	Intron	protein_coding	74	chr19	18913046	18931324	-
Merged-chr19-23221713-1	chr19	23221676	23221750	-	0	{'ENST00000418100.6': '3UTR'}	{'ENST00000418100.6': 'protein_coding'}	{'ENST00000418100.6': 74}	{'ENST00000418100.6': 'chr19'}	{'ENST00000418100.6': 23221599.0}	{'ENST00000418100.6': 23222387.0}	{'ENST00000418100.6': '-'}	ENST00000418100.6	3UTR	protein_coding	74	chr19	23221599	23222387	-	['ENST00000418100.6']	['ENST00000418100.6']	ENST00000418100.6	3UTR	protein_coding	74	chr19	23221599	23222387	-	[]	['ENST00000418100.6']	ENST00000418100.6	3UTR	protein_coding	74	chr19	23221599	23222387	-	ENST00000418100.6	3UTR	protein_coding	74	chr19	23221599	23222387	-
Merged-chr19-46647616-1	chr19	46647579	46647653	-	0	{'ENST00000391916.7': '3UTR', 'ENST00000300875.4': '3UTR'}	{'ENST00000391916.7': 'protein_coding', 'ENST00000300875.4': 'protein_coding'}	{'ENST00000391916.7': 74, 'ENST00000300875.4': 42}	{'ENST00000391916.7': 'chr19', 'ENST00000300875.4': 'chr19'}	{'ENST00000391916.7': 46647551.0, 'ENST00000300875.4': 46647612.0}	{'ENST00000391916.7': 46648484.0, 'ENST00000300875.4': 46648484.0}	{'ENST00000391916.7': '-', 'ENST00000300875.4': '-'}	ENST00000391916.7	3UTR	protein_coding	74	chr19	46647551	46648484	-	['ENST00000391916.7', 'ENST00000300875.4']	['ENST00000391916.7']	ENST00000391916.7	3UTR	protein_coding	74	chr19	46647551	46648484	-	[]	['ENST00000391916.7', 'ENST00000300875.4']	ENST00000391916.7	3UTR	protein_coding	74	chr19	46647551	46648484	-	ENST00000391916.7	3UTR	protein_coding	74	chr19	46647551	46648484	-
Merged-chr19-48241002-1	chr19	48240965	48241039	-	0	{'ENST00000651546.1': '5UTR'}	{'ENST00000651546.1': 'protein_coding'}	{'ENST00000651546.1': 19}	{'ENST00000651546.1': 'chr19'}	{'ENST00000651546.1': 48241021.0}	{'ENST00000651546.1': 48241063.0}	{'ENST00000651546.1': '-'}	ENST00000651546.1	5UTR	protein_coding	19	chr19	48241021	48241063	-	['ENST00000651546.1']	['ENST00000651546.1']	ENST00000651546.1	5UTR	protein_coding	19	chr19	48241021	48241063	-	['ENST00000651546.1']	[]	ENST00000651546.1	5UTR	protein_coding	19	chr19	48241021	48241063	-	ENST00000651546.1	5UTR	protein_coding	19	chr19	48241021	48241063	-
Merged-chr19-57438438-1	chr19	57438401	57438475	+	0	{'ENST00000597410.1': '3UTR', 'ENST00000334181.5': 'Intron', 'ENST00000596831.1': 'Intron'}	{'ENST00000597410.1': 'protein_coding', 'ENST00000334181.5': 'protein_coding', 'ENST00000596831.1': 'protein_coding'}	{'ENST00000597410.1': 56, 'ENST00000334181.5': 74, 'ENST00000596831.1': 74}	{'ENST00000597410.1': 'chr19', 'ENST00000334181.5': 'chr19', 'ENST00000596831.1': 'chr19'}	{'ENST00000597410.1': 57438152.0, 'ENST00000334181.5': 57435593.0, 'ENST00000596831.1': 57438092.0}	{'ENST00000597410.1': 57438457.0, 'ENST00000334181.5': 57441884.0, 'ENST00000596831.1': 57455652.0}	{'ENST00000597410.1': '+', 'ENST00000334181.5': '+', 'ENST00000596831.1': '-'}	ENST00000596831.1	Intron	protein_coding	74	chr19	57438092	57455652	-	['ENST00000597410.1', 'ENST00000334181.5', 'ENST00000596831.1']	['ENST00000334181.5']	ENST00000334181.5	Intron	protein_coding	74	chr19	57435593	57441884	+	[]	['ENST00000597410.1']	ENST00000597410.1	3UTR	protein_coding	56	chr19	57438152	57438457	+	ENST00000334181.5	Intron	protein_coding	74	chr19	57435593	57441884	+
Merged-chr19-1107720-1	chr19	1107683	1107757	-	0	{'ENST00000438103.6': '3UTR', 'ENST00000361757.8': '3UTR', 'ENST00000587024.5': '3UTR'}	{'ENST00000438103.6': 'protein_coding', 'ENST00000361757.8': 'protein_coding', 'ENST00000587024.5': 'protein_coding'}	{'ENST00000438103.6': 74, 'ENST00000361757.8': 74, 'ENST00000587024.5': 74}	{'ENST00000438103.6': 'chr19', 'ENST00000361757.8': 'chr19', 'ENST00000587024.5': 'chr19'}	{'ENST00000438103.6': 1107637.0, 'ENST00000361757.8': 1107638.0, 'ENST00000587024.5': 1107641.0}	{'ENST00000438103.6': 1108222.0, 'ENST00000361757.8': 1108222.0, 'ENST00000587024.5': 1108222.0}	{'ENST00000438103.6': '-', 'ENST00000361757.8': '-', 'ENST00000587024.5': '-'}	ENST00000587024.5	3UTR	protein_coding	74	chr19	1107641	1108222	-	['ENST00000438103.6', 'ENST00000361757.8', 'ENST00000587024.5']	['ENST00000361757.8']	ENST00000361757.8	3UTR	protein_coding	74	chr19	1107638	1108222	-	[]	['ENST00000438103.6', 'ENST00000361757.8', 'ENST00000587024.5']	ENST00000438103.6	3UTR	protein_coding	74	chr19	1107637	1108222	-	ENST00000361757.8	3UTR	protein_coding	74	chr19	1107638	1108222	-
Merged-chr6-7281147-1	chr6	7281110	7281184	-	0	{'ENST00000244763.9': '3UTR', 'ENST00000379928.4': 'Intron', 'ENST00000474597.5': 'Intron', 'ENST00000650389.1': 'Intron'}	{'ENST00000244763.9': 'protein_coding', 'ENST00000379928.4': 'lncRNA', 'ENST00000474597.5': 'protein_coding', 'ENST00000650389.1': 'protein_coding'}	{'ENST00000244763.9': 42, 'ENST00000379928.4': 74, 'ENST00000474597.5': 74, 'ENST00000650389.1': 74}	{'ENST00000244763.9': 'chr6', 'ENST00000379928.4': 'chr6', 'ENST00000474597.5': 'chr6', 'ENST00000650389.1': 'chr6'}	{'ENST00000244763.9': 7281143.0, 'ENST00000379928.4': 7276168.0, 'ENST00000474597.5': 7269154.0, 'ENST00000650389.1': 7269154.0}	{'ENST00000244763.9': 7289866.0, 'ENST00000379928.4': 7285822.0, 'ENST00000474597.5': 7289867.0, 'ENST00000650389.1': 7287861.0}	{'ENST00000244763.9': '-', 'ENST00000379928.4': '+', 'ENST00000474597.5': '-', 'ENST00000650389.1': '-'}	ENST00000379928.4	Intron	lncRNA	74	chr6	7276168	7285822	+	['ENST00000244763.9', 'ENST00000379928.4', 'ENST00000474597.5', 'ENST00000650389.1']	['ENST00000244763.9']	ENST00000244763.9	3UTR	protein_coding	42	chr6	7281143	7289866	-	[]	['ENST00000244763.9']	ENST00000244763.9	3UTR	protein_coding	42	chr6	7281143	7289866	-	ENST00000244763.9	3UTR	protein_coding	42	chr6	7281143	7289866	-
Merged-chr8-38411637-1	chr8	38411600	38411674	-	0	{'ENST00000397091.9': '3UTR', 'ENST00000341462.9': '3UTR', 'ENST00000447712.7': '3UTR', 'ENST00000532791.5': '3UTR', 'ENST00000425967.8': '3UTR'}	{'ENST00000397091.9': 'protein_coding', 'ENST00000341462.9': 'protein_coding', 'ENST00000447712.7': 'protein_coding', 'ENST00000532791.5': 'protein_coding', 'ENST00000425967.8': 'protein_coding'}	{'ENST00000397091.9': 74, 'ENST00000341462.9': 74, 'ENST00000447712.7': 74, 'ENST00000532791.5': 74, 'ENST00000425967.8': 33}	{'ENST00000397091.9': 'chr8', 'ENST00000341462.9': 'chr8', 'ENST00000447712.7': 'chr8', 'ENST00000532791.5': 'chr8', 'ENST00000425967.8': 'chr8'}	{'ENST00000397091.9': 38411138.0, 'ENST00000341462.9': 38411143.0, 'ENST00000447712.7': 38411143.0, 'ENST00000532791.5': 38411231.0, 'ENST00000425967.8': 38411642.0}	{'ENST00000397091.9': 38413630.0, 'ENST00000341462.9': 38412391.0, 'ENST00000447712.7': 38413630.0, 'ENST00000532791.5': 38413630.0, 'ENST00000425967.8': 38412391.0}	{'ENST00000397091.9': '-', 'ENST00000341462.9': '-', 'ENST00000447712.7': '-', 'ENST00000532791.5': '-', 'ENST00000425967.8': '-'}	ENST00000532791.5	3UTR	protein_coding	74	chr8	38411231	38413630	-	['ENST00000397091.9', 'ENST00000341462.9', 'ENST00000447712.7', 'ENST00000532791.5', 'ENST00000425967.8']	['ENST00000447712.7']	ENST00000447712.7	3UTR	protein_coding	74	chr8	38411143	38413630	-	[]	['ENST00000397091.9', 'ENST00000341462.9', 'ENST00000447712.7', 'ENST00000532791.5', 'ENST00000425967.8']	ENST00000397091.9	3UTR	protein_coding	74	chr8	38411138	38413630	-	ENST00000447712.7	3UTR	protein_coding	74	chr8	38411143	38413630	-
Merged-chr8-144361262-1	chr8	144361225	144361299	+	0	{'ENST00000675888.1': '3UTR', 'ENST00000532815.2': '3UTR', 'ENST00000530047.5': '3UTR', 'ENST00000329994.7': '3UTR', 'ENST00000526752.3': '3UTR'}	{'ENST00000675888.1': 'protein_coding', 'ENST00000532815.2': 'protein_coding', 'ENST00000530047.5': 'protein_coding', 'ENST00000329994.7': 'protein_coding', 'ENST00000526752.3': 'protein_coding'}	{'ENST00000675888.1': 27, 'ENST00000532815.2': 47, 'ENST00000530047.5': 45, 'ENST00000329994.7': 61, 'ENST00000526752.3': 47}	{'ENST00000675888.1': 'chr8', 'ENST00000532815.2': 'chr8', 'ENST00000530047.5': 'chr8', 'ENST00000329994.7': 'chr8', 'ENST00000526752.3': 'chr8'}	{'ENST00000675888.1': 144361013.0, 'ENST00000532815.2': 144361013.0, 'ENST00000530047.5': 144361013.0, 'ENST00000329994.7': 144361013.0, 'ENST00000526752.3': 144361006.0}	{'ENST00000675888.1': 144361252.0, 'ENST00000532815.2': 144361272.0, 'ENST00000530047.5': 144361270.0, 'ENST00000329994.7': 144361286.0, 'ENST00000526752.3': 144361272.0}	{'ENST00000675888.1': '+', 'ENST00000532815.2': '+', 'ENST00000530047.5': '+', 'ENST00000329994.7': '+', 'ENST00000526752.3': '+'}	ENST00000329994.7	3UTR	protein_coding	61	chr8	144361013	144361286	+	['ENST00000675888.1', 'ENST00000532815.2', 'ENST00000530047.5', 'ENST00000329994.7', 'ENST00000526752.3']	[]	ENST00000329994.7	3UTR	protein_coding	61	chr8	144361013	144361286	+	[]	['ENST00000675888.1', 'ENST00000532815.2', 'ENST00000530047.5', 'ENST00000329994.7', 'ENST00000526752.3']	ENST00000329994.7	3UTR	protein_coding	61	chr8	144361013	144361286	+	ENST00000329994.7	3UTR	protein_coding	61	chr8	144361013	144361286	+
Merged-chr8-11844352-1	chr8	11844315	11844389	-	0	{'ENST00000679121.1': '3UTR', 'ENST00000678242.1': '3UTR', 'ENST00000677366.1': '3UTR', 'ENST00000677544.1': '3UTR', 'ENST00000677418.1': '3UTR', 'ENST00000677047.1': '3UTR', 'ENST00000678629.1': '3UTR', 'ENST00000678145.1': '3UTR', 'ENST00000678929.1': '3UTR', 'ENST00000677819.1': '3UTR', 'ENST00000677415.1': '3UTR', 'ENST00000678357.1': '3UTR', 'ENST00000676755.1': '3UTR', 'ENST00000679051.1': …	{'ENST00000679121.1': 'protein_coding', 'ENST00000678242.1': 'protein_coding', 'ENST00000677366.1': 'protein_coding', 'ENST00000677544.1': 'protein_coding', 'ENST00000677418.1': 'protein_coding', 'ENST00000677047.1': 'protein_coding', 'ENST00000678629.1': 'protein_coding', 'ENST00000678145.1': 'protein_coding', 'ENST00000678929.1': 'protein_coding', 'ENST00000677819.1': 'protein_coding', 'ENST000…	{'ENST00000679121.1': 74, 'ENST00000678242.1': 74, 'ENST00000677366.1': 74, 'ENST00000677544.1': 74, 'ENST00000677418.1': 74, 'ENST00000677047.1': 74, 'ENST00000678629.1': 74, 'ENST00000678145.1': 74, 'ENST00000678929.1': 74, 'ENST00000677819.1': 74, 'ENST00000677415.1': 74, 'ENST00000678357.1': 74, 'ENST00000676755.1': 74, 'ENST00000679051.1': 74, 'ENST00000453527.7': 74, 'ENST00000679140.1': 71…	{'ENST00000679121.1': 'chr8', 'ENST00000678242.1': 'chr8', 'ENST00000677366.1': 'chr8', 'ENST00000677544.1': 'chr8', 'ENST00000677418.1': 'chr8', 'ENST00000677047.1': 'chr8', 'ENST00000678629.1': 'chr8', 'ENST00000678145.1': 'chr8', 'ENST00000678929.1': 'chr8', 'ENST00000677819.1': 'chr8', 'ENST00000677415.1': 'chr8', 'ENST00000678357.1': 'chr8', 'ENST00000676755.1': 'chr8', 'ENST00000679051.1': …	{'ENST00000679121.1': 11842524.0, 'ENST00000678242.1': 11842560.0, 'ENST00000677366.1': 11842831.0, 'ENST00000677544.1': 11842997.0, 'ENST00000677418.1': 11843027.0, 'ENST00000677047.1': 11843034.0, 'ENST00000678629.1': 11843159.0, 'ENST00000678145.1': 11843182.0, 'ENST00000678929.1': 11843212.0, 'ENST00000677819.1': 11843220.0, 'ENST00000677415.1': 11843244.0, 'ENST00000678357.1': 11843931.0, 'E…	{'ENST00000679121.1': 11845127.0, 'ENST00000678242.1': 11845127.0, 'ENST00000677366.1': 11845127.0, 'ENST00000677544.1': 11845127.0, 'ENST00000677418.1': 11845127.0, 'ENST00000677047.1': 11845127.0, 'ENST00000678629.1': 11845127.0, 'ENST00000678145.1': 11845127.0, 'ENST00000678929.1': 11845127.0, 'ENST00000677819.1': 11845127.0, 'ENST00000677415.1': 11845127.0, 'ENST00000678357.1': 11845127.0, 'E…	{'ENST00000679121.1': '-', 'ENST00000678242.1': '-', 'ENST00000677366.1': '-', 'ENST00000677544.1': '-', 'ENST00000677418.1': '-', 'ENST00000677047.1': '-', 'ENST00000678629.1': '-', 'ENST00000678145.1': '-', 'ENST00000678929.1': '-', 'ENST00000677819.1': '-', 'ENST00000677415.1': '-', 'ENST00000678357.1': '-', 'ENST00000676755.1': '-', 'ENST00000679051.1': '-', 'ENST00000453527.7': '-', 'ENST000…	ENST00000453527.7	3UTR	protein_coding	74	chr8	11844313	11845127	-	['ENST00000679121.1', 'ENST00000678242.1', 'ENST00000677366.1', 'ENST00000677544.1', 'ENST00000677418.1', 'ENST00000677047.1', 'ENST00000678629.1', 'ENST00000678145.1', 'ENST00000678929.1', 'ENST00000677819.1', 'ENST00000677415.1', 'ENST00000678357.1', 'ENST00000676755.1', 'ENST00000679051.1', 'ENST00000453527.7', 'ENST00000679140.1', 'ENST00000533455.6', 'ENST00000534382.6', 'ENST00000534510.6',…	[]	ENST00000453527.7	3UTR	protein_coding	74	chr8	11844313	11845127	-	[]	['ENST00000679121.1', 'ENST00000678242.1', 'ENST00000677366.1', 'ENST00000677544.1', 'ENST00000677418.1', 'ENST00000677047.1', 'ENST00000678629.1', 'ENST00000678145.1', 'ENST00000678929.1', 'ENST00000677819.1', 'ENST00000677415.1', 'ENST00000678357.1', 'ENST00000676755.1', 'ENST00000679051.1', 'ENST00000453527.7', 'ENST00000679140.1', 'ENST00000533455.6', 'ENST00000534382.6', 'ENST00000534510.6',…	ENST00000679121.1	3UTR	protein_coding	74	chr8	11842524	11845127	-	ENST00000453527.7	3UTR	protein_coding	74	chr8	11844313	11845127	-
Merged-chr8-19967248-1	chr8	19967211	19967285	+	0	{'ENST00000650287.1': 'exon'}	{'ENST00000650287.1': 'protein_coding'}	{'ENST00000650287.1': 48}	{'ENST00000650287.1': 'chr8'}	{'ENST00000650287.1': 19965310.0}	{'ENST00000650287.1': 19967259.0}	{'ENST00000650287.1': '+'}	ENST00000650287.1	exon	protein_coding	48	chr8	19965310	19967259	+	['ENST00000650287.1']	['ENST00000650287.1']	ENST00000650287.1	exon	protein_coding	48	chr8	19965310	19967259	+	[]	[]	ENST00000650287.1	exon	protein_coding	48	chr8	19965310	19967259	+	ENST00000650287.1	exon	protein_coding	48	chr8	19965310	19967259	+
Merged-chr8-27614645-1	chr8	27614608	27614682	-	0	{'ENST00000316403.15': 'Intron'}	{'ENST00000316403.15': 'protein_coding'}	{'ENST00000316403.15': 46}	{'ENST00000316403.15': 'chr8'}	{'ENST00000316403.15': 27610600.0}	{'ENST00000316403.15': 27614654.0}	{'ENST00000316403.15': '-'}	ENST00000316403.15	Intron	protein_coding	46	chr8	27610600	27614654	-	['ENST00000316403.15']	['ENST00000316403.15']	ENST00000316403.15	Intron	protein_coding	46	chr8	27610600	27614654	-	[]	[]	ENST00000316403.15	Intron	protein_coding	46	chr8	27610600	27614654	-	ENST00000316403.15	Intron	protein_coding	46	chr8	27610600	27614654	-
Merged-chr8-40154791-1	chr8	40154754	40154828	+	0	{'ENST00000315792.5': '3UTR'}	{'ENST00000315792.5': 'protein_coding'}	{'ENST00000315792.5': 74}	{'ENST00000315792.5': 'chr8'}	{'ENST00000315792.5': 40153851.0}	{'ENST00000315792.5': 40155310.0}	{'ENST00000315792.5': '+'}	ENST00000315792.5	3UTR	protein_coding	74	chr8	40153851	40155310	+	['ENST00000315792.5']	['ENST00000315792.5']	ENST00000315792.5	3UTR	protein_coding	74	chr8	40153851	40155310	+	[]	['ENST00000315792.5']	ENST00000315792.5	3UTR	protein_coding	74	chr8	40153851	40155310	+	ENST00000315792.5	3UTR	protein_coding	74	chr8	40153851	40155310	+
Merged-chr8-54046378-1	chr8	54046341	54046415	-	0	{'ENST00000316963.8': '3UTR', 'ENST00000618741.1': '3UTR'}	{'ENST00000316963.8': 'protein_coding', 'ENST00000618741.1': 'protein_coding'}	{'ENST00000316963.8': 49, 'ENST00000618741.1': 48}	{'ENST00000316963.8': 'chr8', 'ENST00000618741.1': 'chr8'}	{'ENST00000316963.8': 54046367.0, 'ENST00000618741.1': 54046368.0}	{'ENST00000316963.8': 54048067.0, 'ENST00000618741.1': 54048067.0}	{'ENST00000316963.8': '-', 'ENST00000618741.1': '-'}	ENST00000316963.8	3UTR	protein_coding	49	chr8	54046367	54048067	-	['ENST00000316963.8', 'ENST00000618741.1']	['ENST00000316963.8']	ENST00000316963.8	3UTR	protein_coding	49	chr8	54046367	54048067	-	[]	['ENST00000316963.8', 'ENST00000618741.1']	ENST00000316963.8	3UTR	protein_coding	49	chr8	54046367	54048067	-	ENST00000316963.8	3UTR	protein_coding	49	chr8	54046367	54048067	-
Merged-chr8-55773269-1	chr8	55773232	55773306	-	0	{'ENST00000334667.6': 'exon', 'ENST00000519784.5': 'exon', 'ENST00000521229.5': 'exon', 'ENST00000522576.5': 'exon', 'ENST00000434581.7': 'Intron', 'ENST00000523073.5': 'Intron'}	{'ENST00000334667.6': 'protein_coding', 'ENST00000519784.5': 'protein_coding', 'ENST00000521229.5': 'protein_coding', 'ENST00000522576.5': 'protein_coding', 'ENST00000434581.7': 'protein_coding', 'ENST00000523073.5': 'protein_coding'}	{'ENST00000334667.6': 38, 'ENST00000519784.5': 38, 'ENST00000521229.5': 38, 'ENST00000522576.5': 74, 'ENST00000434581.7': 36, 'ENST00000523073.5': 36}	{'ENST00000334667.6': 'chr8', 'ENST00000519784.5': 'chr8', 'ENST00000521229.5': 'chr8', 'ENST00000522576.5': 'chr8', 'ENST00000434581.7': 'chr8', 'ENST00000523073.5': 'chr8'}	{'ENST00000334667.6': 55773269.0, 'ENST00000519784.5': 55773269.0, 'ENST00000521229.5': 55773269.0, 'ENST00000522576.5': 55773227.0, 'ENST00000434581.7': 55763980.0, 'ENST00000523073.5': 55756411.0}	{'ENST00000334667.6': 55773407.0, 'ENST00000519784.5': 55773352.0, 'ENST00000521229.5': 55773367.0, 'ENST00000522576.5': 55773378.0, 'ENST00000434581.7': 55773268.0, 'ENST00000523073.5': 55773268.0}	{'ENST00000334667.6': '-', 'ENST00000519784.5': '-', 'ENST00000521229.5': '-', 'ENST00000522576.5': '-', 'ENST00000434581.7': '-', 'ENST00000523073.5': '-'}	ENST00000522576.5	exon	protein_coding	74	chr8	55773227	55773378	-	['ENST00000334667.6', 'ENST00000519784.5', 'ENST00000521229.5', 'ENST00000522576.5', 'ENST00000434581.7', 'ENST00000523073.5']	['ENST00000434581.7']	ENST00000434581.7	Intron	protein_coding	36	chr8	55763980	55773268	-	[]	[]	ENST00000434581.7	Intron	protein_coding	36	chr8	55763980	55773268	-	ENST00000434581.7	Intron	protein_coding	36	chr8	55763980	55773268	-
Merged-chr8-56962733-1	chr8	56962696	56962770	-	0	{'ENST00000262644.9': '3UTR'}	{'ENST00000262644.9': 'protein_coding'}	{'ENST00000262644.9': 74}	{'ENST00000262644.9': 'chr8'}	{'ENST00000262644.9': 56957931.0}	{'ENST00000262644.9': 56963795.0}	{'ENST00000262644.9': '-'}	ENST00000262644.9	3UTR	protein_coding	74	chr8	56957931	56963795	-	['ENST00000262644.9']	['ENST00000262644.9']	ENST00000262644.9	3UTR	protein_coding	74	chr8	56957931	56963795	-	[]	['ENST00000262644.9']	ENST00000262644.9	3UTR	protein_coding	74	chr8	56957931	56963795	-	ENST00000262644.9	3UTR	protein_coding	74	chr8	56957931	56963795	-
Merged-chr8-100948766-1	chr8	100948729	100948803	-	0	{'ENST00000395958.6': 'CDS', 'ENST00000395948.6': 'Intron', 'ENST00000521309.5': 'Intron'}	{'ENST00000395958.6': 'protein_coding', 'ENST00000395948.6': 'protein_coding', 'ENST00000521309.5': 'protein_coding'}	{'ENST00000395958.6': 74, 'ENST00000395948.6': 72, 'ENST00000521309.5': 74}	{'ENST00000395958.6': 'chr8', 'ENST00000395948.6': 'chr8', 'ENST00000521309.5': 'chr8'}	{'ENST00000395958.6': 100948596.0, 'ENST00000395948.6': 100948732.0, 'ENST00000521309.5': 100925039.0}	{'ENST00000395958.6': 100948889.0, 'ENST00000395948.6': 100952849.0, 'ENST00000521309.5': 100951928.0}	{'ENST00000395958.6': '-', 'ENST00000395948.6': '-', 'ENST00000521309.5': '-'}	ENST00000395958.6	CDS	protein_coding	74	chr8	100948596	100948889	-	['ENST00000395958.6', 'ENST00000395948.6', 'ENST00000521309.5']	['ENST00000395958.6']	ENST00000395958.6	CDS	protein_coding	74	chr8	100948596	100948889	-	[]	[]	ENST00000395958.6	CDS	protein_coding	74	chr8	100948596	100948889	-	ENST00000395958.6	CDS	protein_coding	74	chr8	100948596	100948889	-
Merged-chr8-103229316-1	chr8	103229279	103229353	+	0	{'ENST00000438105.2': '3UTR', 'ENST00000309982.10': '3UTR', 'ENST00000523775.1': 'exon', 'ENST00000499522.6': 'Intron'}	{'ENST00000438105.2': 'protein_coding', 'ENST00000309982.10': 'protein_coding', 'ENST00000523775.1': 'lncRNA', 'ENST00000499522.6': 'lncRNA'}	{'ENST00000438105.2': 74, 'ENST00000309982.10': 74, 'ENST00000523775.1': 35, 'ENST00000499522.6': 74}	{'ENST00000438105.2': 'chr8', 'ENST00000309982.10': 'chr8', 'ENST00000523775.1': 'chr8', 'ENST00000499522.6': 'chr8'}	{'ENST00000438105.2': 103227991.0, 'ENST00000309982.10': 103228097.0, 'ENST00000523775.1': 103229068.0, 'ENST00000499522.6': 103166296.0}	{'ENST00000438105.2': 103230305.0, 'ENST00000309982.10': 103230305.0, 'ENST00000523775.1': 103229314.0, 'ENST00000499522.6': 103234279.0}	{'ENST00000438105.2': '+', 'ENST00000309982.10': '+', 'ENST00000523775.1': '-', 'ENST00000499522.6': '-'}	ENST00000309982.10	3UTR	protein_coding	74	chr8	103228097	103230305	+	['ENST00000438105.2', 'ENST00000309982.10', 'ENST00000523775.1', 'ENST00000499522.6']	['ENST00000309982.10']	ENST00000309982.10	3UTR	protein_coding	74	chr8	103228097	103230305	+	[]	['ENST00000438105.2', 'ENST00000309982.10']	ENST00000438105.2	3UTR	protein_coding	74	chr8	103227991	103230305	+	ENST00000309982.10	3UTR	protein_coding	74	chr8	103228097	103230305	+
Merged-chr8-144314706-1	chr8	144314669	144314743	+	0	{'ENST00000528838.6': '3UTR', 'ENST00000528718.6': '3UTR', 'ENST00000525023.1': 'exon'}	{'ENST00000528838.6': 'protein_coding', 'ENST00000528718.6': 'protein_coding', 'ENST00000525023.1': 'lncRNA'}	{'ENST00000528838.6': 51, 'ENST00000528718.6': 74, 'ENST00000525023.1': 74}	{'ENST00000528838.6': 'chr8', 'ENST00000528718.6': 'chr8', 'ENST00000525023.1': 'chr8'}	{'ENST00000528838.6': 144314328.0, 'ENST00000528718.6': 144314584.0, 'ENST00000525023.1': 144314590.0}	{'ENST00000528838.6': 144314720.0, 'ENST00000528718.6': 144316556.0, 'ENST00000525023.1': 144314820.0}	{'ENST00000528838.6': '+', 'ENST00000528718.6': '-', 'ENST00000525023.1': '-'}	ENST00000525023.1	exon	lncRNA	74	chr8	144314590	144314820	-	['ENST00000528838.6', 'ENST00000528718.6', 'ENST00000525023.1']	['ENST00000528838.6', 'ENST00000528718.6']	ENST00000528838.6	3UTR	protein_coding	51	chr8	144314328	144314720	+	[]	['ENST00000528838.6', 'ENST00000528718.6']	ENST00000528718.6	3UTR	protein_coding	74	chr8	144314584	144316556	-	ENST00000528838.6	3UTR	protein_coding	51	chr8	144314328	144314720	+
Merged-chr8-28563894-1	chr8	28563857	28563931	+	0	{'ENST00000537916.2': '3UTR', 'ENST00000240093.8': '3UTR'}	{'ENST00000537916.2': 'protein_coding', 'ENST00000240093.8': 'protein_coding'}	{'ENST00000537916.2': 74, 'ENST00000240093.8': 74}	{'ENST00000537916.2': 'chr8', 'ENST00000240093.8': 'chr8'}	{'ENST00000537916.2': 28563009.0, 'ENST00000240093.8': 28563009.0}	{'ENST00000537916.2': 28574267.0, 'ENST00000240093.8': 28574258.0}	{'ENST00000537916.2': '+', 'ENST00000240093.8': '+'}	ENST00000537916.2	3UTR	protein_coding	74	chr8	28563009	28574267	+	['ENST00000537916.2', 'ENST00000240093.8']	['ENST00000240093.8']	ENST00000240093.8	3UTR	protein_coding	74	chr8	28563009	28574258	+	[]	['ENST00000537916.2', 'ENST00000240093.8']	ENST00000537916.2	3UTR	protein_coding	74	chr8	28563009	28574267	+	ENST00000240093.8	3UTR	protein_coding	74	chr8	28563009	28574258	+
Merged-chr8-28571891-1	chr8	28571854	28571928	+	0	{'ENST00000537916.2': '3UTR', 'ENST00000240093.8': '3UTR'}	{'ENST00000537916.2': 'protein_coding', 'ENST00000240093.8': 'protein_coding'}	{'ENST00000537916.2': 74, 'ENST00000240093.8': 74}	{'ENST00000537916.2': 'chr8', 'ENST00000240093.8': 'chr8'}	{'ENST00000537916.2': 28563009.0, 'ENST00000240093.8': 28563009.0}	{'ENST00000537916.2': 28574267.0, 'ENST00000240093.8': 28574258.0}	{'ENST00000537916.2': '+', 'ENST00000240093.8': '+'}	ENST00000537916.2	3UTR	protein_coding	74	chr8	28563009	28574267	+	['ENST00000537916.2', 'ENST00000240093.8']	['ENST00000240093.8']	ENST00000240093.8	3UTR	protein_coding	74	chr8	28563009	28574258	+	[]	['ENST00000537916.2', 'ENST00000240093.8']	ENST00000537916.2	3UTR	protein_coding	74	chr8	28563009	28574267	+	ENST00000240093.8	3UTR	protein_coding	74	chr8	28563009	28574258	+
Merged-chr8-38990770-1	chr8	38990733	38990807	-	0	{'ENST00000456845.6': '3UTR', 'ENST00000397070.6': '3UTR'}	{'ENST00000456845.6': 'protein_coding', 'ENST00000397070.6': 'protein_coding'}	{'ENST00000456845.6': 74, 'ENST00000397070.6': 3}	{'ENST00000456845.6': 'chr8', 'ENST00000397070.6': 'chr8'}	{'ENST00000456845.6': 38988808.0, 'ENST00000397070.6': 38990805.0}	{'ENST00000456845.6': 38991334.0, 'ENST00000397070.6': 38991334.0}	{'ENST00000456845.6': '-', 'ENST00000397070.6': '-'}	ENST00000456845.6	3UTR	protein_coding	74	chr8	38988808	38991334	-	['ENST00000456845.6', 'ENST00000397070.6']	[]	ENST00000456845.6	3UTR	protein_coding	74	chr8	38988808	38991334	-	[]	['ENST00000456845.6', 'ENST00000397070.6']	ENST00000456845.6	3UTR	protein_coding	74	chr8	38988808	38991334	-	ENST00000456845.6	3UTR	protein_coding	74	chr8	38988808	38991334	-
Merged-chr8-61501239-1	chr8	61501202	61501276	-	0	{'ENST00000519846.5': '3UTR', 'ENST00000325897.5': '3UTR', 'ENST00000518592.5': '3UTR', 'ENST00000379454.9': '3UTR'}	{'ENST00000519846.5': 'protein_coding', 'ENST00000325897.5': 'protein_coding', 'ENST00000518592.5': 'protein_coding', 'ENST00000379454.9': 'protein_coding'}	{'ENST00000519846.5': 74, 'ENST00000325897.5': 74, 'ENST00000518592.5': 74, 'ENST00000379454.9': 74}	{'ENST00000519846.5': 'chr8', 'ENST00000325897.5': 'chr8', 'ENST00000518592.5': 'chr8', 'ENST00000379454.9': 'chr8'}	{'ENST00000519846.5': 61499540.0, 'ENST00000325897.5': 61499540.0, 'ENST00000518592.5': 61499540.0, 'ENST00000379454.9': 61500556.0}	{'ENST00000519846.5': 61501627.0, 'ENST00000325897.5': 61501629.0, 'ENST00000518592.5': 61501645.0, 'ENST00000379454.9': 61503361.0}	{'ENST00000519846.5': '+', 'ENST00000325897.5': '+', 'ENST00000518592.5': '+', 'ENST00000379454.9': '-'}	ENST00000379454.9	3UTR	protein_coding	74	chr8	61500556	61503361	-	['ENST00000519846.5', 'ENST00000325897.5', 'ENST00000518592.5', 'ENST00000379454.9']	['ENST00000325897.5', 'ENST00000379454.9']	ENST00000379454.9	3UTR	protein_coding	74	chr8	61500556	61503361	-	[]	['ENST00000519846.5', 'ENST00000325897.5', 'ENST00000518592.5', 'ENST00000379454.9']	ENST00000519846.5	3UTR	protein_coding	74	chr8	61499540	61501627	+	ENST00000379454.9	3UTR	protein_coding	74	chr8	61500556	61503361	-
Merged-chr8-93924347-1	chr8	93924310	93924384	+	0	{'ENST00000297598.5': '3UTR', 'ENST00000520728.5': '3UTR', 'ENST00000396200.3': '3UTR'}	{'ENST00000297598.5': 'protein_coding', 'ENST00000520728.5': 'protein_coding', 'ENST00000396200.3': 'protein_coding'}	{'ENST00000297598.5': 74, 'ENST00000520728.5': 74, 'ENST00000396200.3': 74}	{'ENST00000297598.5': 'chr8', 'ENST00000520728.5': 'chr8', 'ENST00000396200.3': 'chr8'}	{'ENST00000297598.5': 93923671.0, 'ENST00000520728.5': 93923671.0, 'ENST00000396200.3': 93923671.0}	{'ENST00000297598.5': 93926068.0, 'ENST00000520728.5': 93924388.0, 'ENST00000396200.3': 93926066.0}	{'ENST00000297598.5': '+', 'ENST00000520728.5': '+', 'ENST00000396200.3': '+'}	ENST00000297598.5	3UTR	protein_coding	74	chr8	93923671	93926068	+	['ENST00000297598.5', 'ENST00000520728.5', 'ENST00000396200.3']	['ENST00000297598.5']	ENST00000297598.5	3UTR	protein_coding	74	chr8	93923671	93926068	+	[]	['ENST00000297598.5', 'ENST00000520728.5', 'ENST00000396200.3']	ENST00000297598.5	3UTR	protein_coding	74	chr8	93923671	93926068	+	ENST00000297598.5	3UTR	protein_coding	74	chr8	93923671	93926068	+
Merged-chr8-11839292-1	chr8	11839255	11839329	+	0	{'ENST00000615631.4': '3UTR', 'ENST00000530337.6': '3UTR', 'ENST00000220584.9': '3UTR', 'ENST00000622850.3': '3UTR'}	{'ENST00000615631.4': 'protein_coding', 'ENST00000530337.6': 'protein_coding', 'ENST00000220584.9': 'protein_coding', 'ENST00000622850.3': 'protein_coding'}	{'ENST00000615631.4': 49, 'ENST00000530337.6': 42, 'ENST00000220584.9': 43, 'ENST00000622850.3': 74}	{'ENST00000615631.4': 'chr8', 'ENST00000530337.6': 'chr8', 'ENST00000220584.9': 'chr8', 'ENST00000622850.3': 'chr8'}	{'ENST00000615631.4': 11838607.0, 'ENST00000530337.6': 11838607.0, 'ENST00000220584.9': 11838607.0, 'ENST00000622850.3': 11838607.0}	{'ENST00000615631.4': 11839304.0, 'ENST00000530337.6': 11839297.0, 'ENST00000220584.9': 11839298.0, 'ENST00000622850.3': 11839395.0}	{'ENST00000615631.4': '+', 'ENST00000530337.6': '+', 'ENST00000220584.9': '+', 'ENST00000622850.3': '+'}	ENST00000622850.3	3UTR	protein_coding	74	chr8	11838607	11839395	+	['ENST00000615631.4', 'ENST00000530337.6', 'ENST00000220584.9', 'ENST00000622850.3']	['ENST00000220584.9']	ENST00000220584.9	3UTR	protein_coding	43	chr8	11838607	11839298	+	[]	['ENST00000615631.4', 'ENST00000530337.6', 'ENST00000220584.9', 'ENST00000622850.3']	ENST00000622850.3	3UTR	protein_coding	74	chr8	11838607	11839395	+	ENST00000220584.9	3UTR	protein_coding	43	chr8	11838607	11839298	+
Merged-chr8-30156058-1	chr8	30156021	30156095	-	0	{'ENST00000607315.2': 'exon'}	{'ENST00000607315.2': 'lncRNA'}	{'ENST00000607315.2': 74}	{'ENST00000607315.2': 'chr8'}	{'ENST00000607315.2': 30155828.0}	{'ENST00000607315.2': 30156633.0}	{'ENST00000607315.2': '-'}	ENST00000607315.2	exon	lncRNA	74	chr8	30155828	30156633	-	['ENST00000607315.2']	[]	ENST00000607315.2	exon	lncRNA	74	chr8	30155828	30156633	-	[]	[]	ENST00000607315.2	exon	lncRNA	74	chr8	30155828	30156633	-	ENST00000607315.2	exon	lncRNA	74	chr8	30155828	30156633	-
Merged-chr8-60781359-1	chr8	60781322	60781396	+	0	{'ENST00000423902.7': 'exon', 'ENST00000524602.5': 'Intron'}	{'ENST00000423902.7': 'protein_coding', 'ENST00000524602.5': 'protein_coding'}	{'ENST00000423902.7': 74, 'ENST00000524602.5': 74}	{'ENST00000423902.7': 'chr8', 'ENST00000524602.5': 'chr8'}	{'ENST00000423902.7': 60781000.0, 'ENST00000524602.5': 60781050.0}	{'ENST00000423902.7': 60781430.0, 'ENST00000524602.5': 60862228.0}	{'ENST00000423902.7': '+', 'ENST00000524602.5': '+'}	ENST00000524602.5	Intron	protein_coding	74	chr8	60781050	60862228	+	['ENST00000423902.7', 'ENST00000524602.5']	['ENST00000423902.7']	ENST00000423902.7	exon	protein_coding	74	chr8	60781000	60781430	+	[]	[]	ENST00000423902.7	exon	protein_coding	74	chr8	60781000	60781430	+	ENST00000423902.7	exon	protein_coding	74	chr8	60781000	60781430	+
Merged-chr8-62972300-1	chr8	62972263	62972337	+	0	{'ENST00000623646.3': '3UTR', 'ENST00000519049.6': 'Intron', 'ENST00000674864.1': 'Intron', 'ENST00000523211.5': 'Intron'}	{'ENST00000623646.3': 'protein_coding', 'ENST00000519049.6': 'protein_coding', 'ENST00000674864.1': 'protein_coding', 'ENST00000523211.5': 'protein_coding'}	{'ENST00000623646.3': 74, 'ENST00000519049.6': 74, 'ENST00000674864.1': 74, 'ENST00000523211.5': 74}	{'ENST00000623646.3': 'chr8', 'ENST00000519049.6': 'chr8', 'ENST00000674864.1': 'chr8', 'ENST00000523211.5': 'chr8'}	{'ENST00000623646.3': 62965405.0, 'ENST00000519049.6': 62918513.0, 'ENST00000674864.1': 62953972.0, 'ENST00000523211.5': 62918513.0}	{'ENST00000623646.3': 62984904.0, 'ENST00000519049.6': 62999230.0, 'ENST00000674864.1': 62999230.0, 'ENST00000523211.5': 62990167.0}	{'ENST00000623646.3': '+', 'ENST00000519049.6': '+', 'ENST00000674864.1': '+', 'ENST00000523211.5': '+'}	ENST00000623646.3	3UTR	protein_coding	74	chr8	62965405	62984904	+	['ENST00000623646.3', 'ENST00000519049.6', 'ENST00000674864.1', 'ENST00000523211.5']	['ENST00000623646.3']	ENST00000623646.3	3UTR	protein_coding	74	chr8	62965405	62984904	+	[]	['ENST00000623646.3']	ENST00000623646.3	3UTR	protein_coding	74	chr8	62965405	62984904	+	ENST00000623646.3	3UTR	protein_coding	74	chr8	62965405	62984904	+
Merged-chr8-73291039-1	chr8	73291002	73291076	-	0	{'ENST00000396467.5': '3UTR', 'ENST00000396466.5': '3UTR', 'ENST00000396465.5': '3UTR', 'ENST00000352983.7': 'Intron'}	{'ENST00000396467.5': 'protein_coding', 'ENST00000396466.5': 'protein_coding', 'ENST00000396465.5': 'protein_coding', 'ENST00000352983.7': 'protein_coding'}	{'ENST00000396467.5': 44, 'ENST00000396466.5': 7, 'ENST00000396465.5': 5, 'ENST00000352983.7': 40}	{'ENST00000396467.5': 'chr8', 'ENST00000396466.5': 'chr8', 'ENST00000396465.5': 'chr8', 'ENST00000352983.7': 'chr8'}	{'ENST00000396467.5': 73290284.0, 'ENST00000396466.5': 73291040.0, 'ENST00000396465.5': 73291042.0, 'ENST00000352983.7': 73290705.0}	{'ENST00000396467.5': 73291046.0, 'ENST00000396466.5': 73291046.0, 'ENST00000396465.5': 73291046.0, 'ENST00000352983.7': 73291042.0}	{'ENST00000396467.5': '-', 'ENST00000396466.5': '-', 'ENST00000396465.5': '-', 'ENST00000352983.7': '-'}	ENST00000396467.5	3UTR	protein_coding	44	chr8	73290284	73291046	-	['ENST00000396467.5', 'ENST00000396466.5', 'ENST00000396465.5', 'ENST00000352983.7']	['ENST00000352983.7']	ENST00000352983.7	Intron	protein_coding	40	chr8	73290705	73291042	-	[]	['ENST00000396467.5', 'ENST00000396466.5', 'ENST00000396465.5']	ENST00000396467.5	3UTR	protein_coding	44	chr8	73290284	73291046	-	ENST00000352983.7	Intron	protein_coding	40	chr8	73290705	73291042	-
Merged-chr8-73946413-1	chr8	73946376	73946450	-	0	{'ENST00000520242.6': '3UTR', 'ENST00000688584.1': '3UTR', 'ENST00000685938.1': '3UTR', 'ENST00000520210.1': '3UTR', 'ENST00000284811.12': '3UTR', 'ENST00000519487.6': '3UTR', 'ENST00000602840.5': 'Intron'}	{'ENST00000520242.6': 'protein_coding', 'ENST00000688584.1': 'protein_coding', 'ENST00000685938.1': 'protein_coding', 'ENST00000520210.1': 'protein_coding', 'ENST00000284811.12': 'protein_coding', 'ENST00000519487.6': 'protein_coding', 'ENST00000602840.5': 'protein_coding'}	{'ENST00000520242.6': 74, 'ENST00000688584.1': 74, 'ENST00000685938.1': 74, 'ENST00000520210.1': 74, 'ENST00000284811.12': 50, 'ENST00000519487.6': 33, 'ENST00000602840.5': 74}	{'ENST00000520242.6': 'chr8', 'ENST00000688584.1': 'chr8', 'ENST00000685938.1': 'chr8', 'ENST00000520210.1': 'chr8', 'ENST00000284811.12': 'chr8', 'ENST00000519487.6': 'chr8', 'ENST00000602840.5': 'chr8'}	{'ENST00000520242.6': 73945119.0, 'ENST00000688584.1': 73945166.0, 'ENST00000685938.1': 73945430.0, 'ENST00000520210.1': 73945608.0, 'ENST00000284811.12': 73946401.0, 'ENST00000519487.6': 73946418.0, 'ENST00000602840.5': 73941605.0}	{'ENST00000520242.6': 73946632.0, 'ENST00000688584.1': 73946632.0, 'ENST00000685938.1': 73946632.0, 'ENST00000520210.1': 73946632.0, 'ENST00000284811.12': 73946632.0, 'ENST00000519487.6': 73946632.0, 'ENST00000602840.5': 73955910.0}	{'ENST00000520242.6': '-', 'ENST00000688584.1': '-', 'ENST00000685938.1': '-', 'ENST00000520210.1': '-', 'ENST00000284811.12': '-', 'ENST00000519487.6': '-', 'ENST00000602840.5': '-'}	ENST00000520210.1	3UTR	protein_coding	74	chr8	73945608	73946632	-	['ENST00000520242.6', 'ENST00000688584.1', 'ENST00000685938.1', 'ENST00000520210.1', 'ENST00000284811.12', 'ENST00000519487.6', 'ENST00000602840.5']	['ENST00000520242.6']	ENST00000520242.6	3UTR	protein_coding	74	chr8	73945119	73946632	-	[]	['ENST00000520242.6', 'ENST00000688584.1', 'ENST00000685938.1', 'ENST00000520210.1', 'ENST00000284811.12', 'ENST00000519487.6']	ENST00000520242.6	3UTR	protein_coding	74	chr8	73945119	73946632	-	ENST00000520242.6	3UTR	protein_coding	74	chr8	73945119	73946632	-
Merged-chr8-96233141-1	chr8	96233104	96233178	-	0	{'ENST00000517523.1': 'exon', 'ENST00000287022.10': 'Intron'}	{'ENST00000517523.1': 'protein_coding', 'ENST00000287022.10': 'protein_coding'}	{'ENST00000517523.1': 23, 'ENST00000287022.10': 51}	{'ENST00000517523.1': 'chr8', 'ENST00000287022.10': 'chr8'}	{'ENST00000517523.1': 96233156.0, 'ENST00000287022.10': 96231940.0}	{'ENST00000517523.1': 96233219.0, 'ENST00000287022.10': 96233155.0}	{'ENST00000517523.1': '-', 'ENST00000287022.10': '-'}	ENST00000287022.10	Intron	protein_coding	51	chr8	96231940	96233155	-	['ENST00000517523.1', 'ENST00000287022.10']	['ENST00000287022.10']	ENST00000287022.10	Intron	protein_coding	51	chr8	96231940	96233155	-	[]	[]	ENST00000287022.10	Intron	protein_coding	51	chr8	96231940	96233155	-	ENST00000287022.10	Intron	protein_coding	51	chr8	96231940	96233155	-
Merged-chr8-96611764-1	chr8	96611727	96611801	+	0	{'ENST00000302190.9': '3UTR'}	{'ENST00000302190.9': 'protein_coding'}	{'ENST00000302190.9': 63}	{'ENST00000302190.9': 'chr8'}	{'ENST00000302190.9': 96609546.0}	{'ENST00000302190.9': 96611790.0}	{'ENST00000302190.9': '+'}	ENST00000302190.9	3UTR	protein_coding	63	chr8	96609546	96611790	+	['ENST00000302190.9']	['ENST00000302190.9']	ENST00000302190.9	3UTR	protein_coding	63	chr8	96609546	96611790	+	[]	['ENST00000302190.9']	ENST00000302190.9	3UTR	protein_coding	63	chr8	96609546	96611790	+	ENST00000302190.9	3UTR	protein_coding	63	chr8	96609546	96611790	+
Merged-chr8-102827976-1	chr8	102827939	102828013	-	0	{'ENST00000682725.1': '3UTR', 'ENST00000337198.10': '3UTR', 'ENST00000683787.1': '3UTR', 'ENST00000682014.1': '3UTR', 'ENST00000682969.1': '3UTR', 'ENST00000684721.1': '3UTR', 'ENST00000683965.1': '3UTR', 'ENST00000347770.8': '3UTR'}	{'ENST00000682725.1': 'protein_coding', 'ENST00000337198.10': 'protein_coding', 'ENST00000683787.1': 'protein_coding', 'ENST00000682014.1': 'protein_coding', 'ENST00000682969.1': 'protein_coding', 'ENST00000684721.1': 'protein_coding', 'ENST00000683965.1': 'protein_coding', 'ENST00000347770.8': 'protein_coding'}	{'ENST00000682725.1': 74, 'ENST00000337198.10': 74, 'ENST00000683787.1': 74, 'ENST00000682014.1': 74, 'ENST00000682969.1': 74, 'ENST00000684721.1': 74, 'ENST00000683965.1': 74, 'ENST00000347770.8': 74}	{'ENST00000682725.1': 'chr8', 'ENST00000337198.10': 'chr8', 'ENST00000683787.1': 'chr8', 'ENST00000682014.1': 'chr8', 'ENST00000682969.1': 'chr8', 'ENST00000684721.1': 'chr8', 'ENST00000683965.1': 'chr8', 'ENST00000347770.8': 'chr8'}	{'ENST00000682725.1': 102826111.0, 'ENST00000337198.10': 102826308.0, 'ENST00000683787.1': 102826372.0, 'ENST00000682014.1': 102826379.0, 'ENST00000682969.1': 102826440.0, 'ENST00000684721.1': 102826481.0, 'ENST00000683965.1': 102826591.0, 'ENST00000347770.8': 102827823.0}	{'ENST00000682725.1': 102828569.0, 'ENST00000337198.10': 102828569.0, 'ENST00000683787.1': 102828569.0, 'ENST00000682014.1': 102828569.0, 'ENST00000682969.1': 102828569.0, 'ENST00000684721.1': 102828569.0, 'ENST00000683965.1': 102828569.0, 'ENST00000347770.8': 102828569.0}	{'ENST00000682725.1': '-', 'ENST00000337198.10': '-', 'ENST00000683787.1': '-', 'ENST00000682014.1': '-', 'ENST00000682969.1': '-', 'ENST00000684721.1': '-', 'ENST00000683965.1': '-', 'ENST00000347770.8': '-'}	ENST00000347770.8	3UTR	protein_coding	74	chr8	102827823	102828569	-	['ENST00000682725.1', 'ENST00000337198.10', 'ENST00000683787.1', 'ENST00000682014.1', 'ENST00000682969.1', 'ENST00000684721.1', 'ENST00000683965.1', 'ENST00000347770.8']	['ENST00000337198.10']	ENST00000337198.10	3UTR	protein_coding	74	chr8	102826308	102828569	-	[]	['ENST00000682725.1', 'ENST00000337198.10', 'ENST00000683787.1', 'ENST00000682014.1', 'ENST00000682969.1', 'ENST00000684721.1', 'ENST00000683965.1', 'ENST00000347770.8']	ENST00000682725.1	3UTR	protein_coding	74	chr8	102826111	102828569	-	ENST00000337198.10	3UTR	protein_coding	74	chr8	102826308	102828569	-
Merged-chr8-124487910-1	chr8	124487873	124487947	+	0	{'ENST00000303545.4': '3UTR'}	{'ENST00000303545.4': 'protein_coding'}	{'ENST00000303545.4': 74}	{'ENST00000303545.4': 'chr8'}	{'ENST00000303545.4': 124487642.0}	{'ENST00000303545.4': 124488618.0}	{'ENST00000303545.4': '+'}	ENST00000303545.4	3UTR	protein_coding	74	chr8	124487642	124488618	+	['ENST00000303545.4']	['ENST00000303545.4']	ENST00000303545.4	3UTR	protein_coding	74	chr8	124487642	124488618	+	[]	['ENST00000303545.4']	ENST00000303545.4	3UTR	protein_coding	74	chr8	124487642	124488618	+	ENST00000303545.4	3UTR	protein_coding	74	chr8	124487642	124488618	+
Merged-chr8-140520172-1	chr8	140520135	140520209	-	0	{'ENST00000220592.10': '3UTR'}	{'ENST00000220592.10': 'protein_coding'}	{'ENST00000220592.10': 54}	{'ENST00000220592.10': 'chr8'}	{'ENST00000220592.10': 140520156.0}	{'ENST00000220592.10': 140532046.0}	{'ENST00000220592.10': '-'}	ENST00000220592.10	3UTR	protein_coding	54	chr8	140520156	140532046	-	['ENST00000220592.10']	['ENST00000220592.10']	ENST00000220592.10	3UTR	protein_coding	54	chr8	140520156	140532046	-	[]	['ENST00000220592.10']	ENST00000220592.10	3UTR	protein_coding	54	chr8	140520156	140532046	-	ENST00000220592.10	3UTR	protein_coding	54	chr8	140520156	140532046	-
Merged-chr8-144841677-1	chr8	144841640	144841714	+	0	{'ENST00000544249.2': 'CDS', 'ENST00000446747.7': 'CDS', 'ENST00000525266.5': 'Intron', 'ENST00000529819.6': 'Intron'}	{'ENST00000544249.2': 'protein_coding', 'ENST00000446747.7': 'protein_coding', 'ENST00000525266.5': 'protein_coding', 'ENST00000529819.6': 'protein_coding'}	{'ENST00000544249.2': 74, 'ENST00000446747.7': 74, 'ENST00000525266.5': 74, 'ENST00000529819.6': 74}	{'ENST00000544249.2': 'chr8', 'ENST00000446747.7': 'chr8', 'ENST00000525266.5': 'chr8', 'ENST00000529819.6': 'chr8'}	{'ENST00000544249.2': 144841396.0, 'ENST00000446747.7': 144841355.0, 'ENST00000525266.5': 144837507.0, 'ENST00000529819.6': 144837507.0}	{'ENST00000544249.2': 144843165.0, 'ENST00000446747.7': 144843165.0, 'ENST00000525266.5': 144845978.0, 'ENST00000529819.6': 144841818.0}	{'ENST00000544249.2': '+', 'ENST00000446747.7': '+', 'ENST00000525266.5': '+', 'ENST00000529819.6': '+'}	ENST00000544249.2	CDS	protein_coding	74	chr8	144841396	144843165	+	['ENST00000544249.2', 'ENST00000446747.7', 'ENST00000525266.5', 'ENST00000529819.6']	[]	ENST00000544249.2	CDS	protein_coding	74	chr8	144841396	144843165	+	[]	[]	ENST00000544249.2	CDS	protein_coding	74	chr8	144841396	144843165	+	ENST00000544249.2	CDS	protein_coding	74	chr8	144841396	144843165	+
Merged-chr8-18029924-1	chr8	18029887	18029961	+	0	{'ENST00000325083.13': '3UTR'}	{'ENST00000325083.13': 'protein_coding'}	{'ENST00000325083.13': 61}	{'ENST00000325083.13': 'chr8'}	{'ENST00000325083.13': 18027660.0}	{'ENST00000325083.13': 18029948.0}	{'ENST00000325083.13': '+'}	ENST00000325083.13	3UTR	protein_coding	61	chr8	18027660	18029948	+	['ENST00000325083.13']	['ENST00000325083.13']	ENST00000325083.13	3UTR	protein_coding	61	chr8	18027660	18029948	+	[]	['ENST00000325083.13']	ENST00000325083.13	3UTR	protein_coding	61	chr8	18027660	18029948	+	ENST00000325083.13	3UTR	protein_coding	61	chr8	18027660	18029948	+
Merged-chr2-163604971-1	chr2	163604934	163605008	-	0	{'ENST00000333129.4': 'exon', 'ENST00000409634.5': 'Intron'}	{'ENST00000333129.4': 'protein_coding', 'ENST00000409634.5': 'protein_coding'}	{'ENST00000333129.4': 74, 'ENST00000409634.5': 74}	{'ENST00000333129.4': 'chr2', 'ENST00000409634.5': 'chr2'}	{'ENST00000333129.4': 163602611.0, 'ENST00000409634.5': 163593796.0}	{'ENST00000333129.4': 163611806.0, 'ENST00000409634.5': 163734902.0}	{'ENST00000333129.4': '-', 'ENST00000409634.5': '-'}	ENST00000333129.4	exon	protein_coding	74	chr2	163602611	163611806	-	['ENST00000333129.4', 'ENST00000409634.5']	['ENST00000333129.4']	ENST00000333129.4	exon	protein_coding	74	chr2	163602611	163611806	-	[]	[]	ENST00000333129.4	exon	protein_coding	74	chr2	163602611	163611806	-	ENST00000333129.4	exon	protein_coding	74	chr2	163602611	163611806	-
Merged-chr2-209730493-1	chr2	209730456	209730530	+	0	{'ENST00000199940.10': '3UTR', 'ENST00000361559.8': '3UTR', 'ENST00000682079.1': '3UTR', 'ENST00000704357.1': '3UTR', 'ENST00000360351.8': '3UTR'}	{'ENST00000199940.10': 'protein_coding', 'ENST00000361559.8': 'protein_coding', 'ENST00000682079.1': 'protein_coding', 'ENST00000704357.1': 'protein_coding', 'ENST00000360351.8': 'protein_coding'}	{'ENST00000199940.10': 62, 'ENST00000361559.8': 67, 'ENST00000682079.1': 74, 'ENST00000704357.1': 74, 'ENST00000360351.8': 74}	{'ENST00000199940.10': 'chr2', 'ENST00000361559.8': 'chr2', 'ENST00000682079.1': 'chr2', 'ENST00000704357.1': 'chr2', 'ENST00000360351.8': 'chr2'}	{'ENST00000199940.10': 209730395.0, 'ENST00000361559.8': 209730395.0, 'ENST00000682079.1': 209730395.0, 'ENST00000704357.1': 209730395.0, 'ENST00000360351.8': 209730395.0}	{'ENST00000199940.10': 209730518.0, 'ENST00000361559.8': 209730523.0, 'ENST00000682079.1': 209734112.0, 'ENST00000704357.1': 209734147.0, 'ENST00000360351.8': 209734118.0}	{'ENST00000199940.10': '+', 'ENST00000361559.8': '+', 'ENST00000682079.1': '+', 'ENST00000704357.1': '+', 'ENST00000360351.8': '+'}	ENST00000682079.1	3UTR	protein_coding	74	chr2	209730395	209734112	+	['ENST00000199940.10', 'ENST00000361559.8', 'ENST00000682079.1', 'ENST00000704357.1', 'ENST00000360351.8']	['ENST00000682079.1']	ENST00000682079.1	3UTR	protein_coding	74	chr2	209730395	209734112	+	[]	['ENST00000199940.10', 'ENST00000361559.8', 'ENST00000682079.1', 'ENST00000704357.1', 'ENST00000360351.8']	ENST00000682079.1	3UTR	protein_coding	74	chr2	209730395	209734112	+	ENST00000682079.1	3UTR	protein_coding	74	chr2	209730395	209734112	+
Merged-chr16-80975821-1	chr16	80975784	80975858	-	0	{'ENST00000570195.5': 'exon', 'ENST00000564249.5': '3UTR', 'ENST00000219400.8': '3UTR', 'ENST00000650780.1': 'Intron'}	{'ENST00000570195.5': 'protein_coding', 'ENST00000564249.5': 'protein_coding', 'ENST00000219400.8': 'protein_coding', 'ENST00000650780.1': 'protein_coding'}	{'ENST00000570195.5': 57, 'ENST00000564249.5': 6, 'ENST00000219400.8': 74, 'ENST00000650780.1': 74}	{'ENST00000570195.5': 'chr16', 'ENST00000564249.5': 'chr16', 'ENST00000219400.8': 'chr16', 'ENST00000650780.1': 'chr16'}	{'ENST00000570195.5': 80975802.0, 'ENST00000564249.5': 80975853.0, 'ENST00000219400.8': 80966448.0, 'ENST00000650780.1': 80830757.0}	{'ENST00000570195.5': 80976179.0, 'ENST00000564249.5': 80976095.0, 'ENST00000219400.8': 80976095.0, 'ENST00000650780.1': 80997313.0}	{'ENST00000570195.5': '-', 'ENST00000564249.5': '-', 'ENST00000219400.8': '-', 'ENST00000650780.1': '-'}	ENST00000219400.8	3UTR	protein_coding	74	chr16	80966448	80976095	-	['ENST00000570195.5', 'ENST00000564249.5', 'ENST00000219400.8', 'ENST00000650780.1']	['ENST00000219400.8']	ENST00000219400.8	3UTR	protein_coding	74	chr16	80966448	80976095	-	[]	['ENST00000564249.5', 'ENST00000219400.8']	ENST00000219400.8	3UTR	protein_coding	74	chr16	80966448	80976095	-	ENST00000219400.8	3UTR	protein_coding	74	chr16	80966448	80976095	-
Merged-chr8-23297194-1	chr8	23297157	23297231	-	0	{'ENST00000389131.8': 'exon'}	{'ENST00000389131.8': 'protein_coding'}	{'ENST00000389131.8': 74}	{'ENST00000389131.8': 'chr8'}	{'ENST00000389131.8': 23296897.0}	{'ENST00000389131.8': 23298122.0}	{'ENST00000389131.8': '-'}	ENST00000389131.8	exon	protein_coding	74	chr8	23296897	23298122	-	['ENST00000389131.8']	['ENST00000389131.8']	ENST00000389131.8	exon	protein_coding	74	chr8	23296897	23298122	-	[]	[]	ENST00000389131.8	exon	protein_coding	74	chr8	23296897	23298122	-	ENST00000389131.8	exon	protein_coding	74	chr8	23296897	23298122	-
Merged-chr8-27236312-1	chr8	27236275	27236349	-	0	{'ENST00000350889.9': '3UTR', 'ENST00000519997.5': 'exon', 'ENST00000265770.11': '3UTR'}	{'ENST00000350889.9': 'protein_coding', 'ENST00000519997.5': 'protein_coding', 'ENST00000265770.11': 'protein_coding'}	{'ENST00000350889.9': 74, 'ENST00000519997.5': 74, 'ENST00000265770.11': 47}	{'ENST00000350889.9': 'chr8', 'ENST00000519997.5': 'chr8', 'ENST00000265770.11': 'chr8'}	{'ENST00000350889.9': 27235308.0, 'ENST00000519997.5': 27235885.0, 'ENST00000265770.11': 27236303.0}	{'ENST00000350889.9': 27236848.0, 'ENST00000519997.5': 27236905.0, 'ENST00000265770.11': 27236848.0}	{'ENST00000350889.9': '-', 'ENST00000519997.5': '-', 'ENST00000265770.11': '-'}	ENST00000519997.5	exon	protein_coding	74	chr8	27235885	27236905	-	['ENST00000350889.9', 'ENST00000519997.5', 'ENST00000265770.11']	['ENST00000350889.9']	ENST00000350889.9	3UTR	protein_coding	74	chr8	27235308	27236848	-	[]	['ENST00000350889.9', 'ENST00000265770.11']	ENST00000350889.9	3UTR	protein_coding	74	chr8	27235308	27236848	-	ENST00000350889.9	3UTR	protein_coding	74	chr8	27235308	27236848	-
Merged-chr16-83811645-1	chr16	83811608	83811682	+	0	{'ENST00000685468.1': 'exon', 'ENST00000433866.7': 'exon', 'ENST00000570259.1': 'Intron'}	{'ENST00000685468.1': 'protein_coding', 'ENST00000433866.7': 'protein_coding', 'ENST00000570259.1': 'protein_coding'}	{'ENST00000685468.1': 74, 'ENST00000433866.7': 74, 'ENST00000570259.1': 74}	{'ENST00000685468.1': 'chr16', 'ENST00000433866.7': 'chr16', 'ENST00000570259.1': 'chr16'}	{'ENST00000685468.1': 83811421.0, 'ENST00000433866.7': 83811421.0, 'ENST00000570259.1': 83809425.0}	{'ENST00000685468.1': 83814675.0, 'ENST00000433866.7': 83819737.0, 'ENST00000570259.1': 83817785.0}	{'ENST00000685468.1': '+', 'ENST00000433866.7': '+', 'ENST00000570259.1': '+'}	ENST00000685468.1	exon	protein_coding	74	chr16	83811421	83814675	+	['ENST00000685468.1', 'ENST00000433866.7', 'ENST00000570259.1']	['ENST00000433866.7']	ENST00000433866.7	exon	protein_coding	74	chr16	83811421	83819737	+	[]	[]	ENST00000433866.7	exon	protein_coding	74	chr16	83811421	83819737	+	ENST00000433866.7	exon	protein_coding	74	chr16	83811421	83819737	+
Merged-chr8-56957945-1	chr8	56957908	56957982	-	0	{'ENST00000262644.9': '3UTR'}	{'ENST00000262644.9': 'protein_coding'}	{'ENST00000262644.9': 52}	{'ENST00000262644.9': 'chr8'}	{'ENST00000262644.9': 56957931.0}	{'ENST00000262644.9': 56963795.0}	{'ENST00000262644.9': '-'}	ENST00000262644.9	3UTR	protein_coding	52	chr8	56957931	56963795	-	['ENST00000262644.9']	['ENST00000262644.9']	ENST00000262644.9	3UTR	protein_coding	52	chr8	56957931	56963795	-	[]	['ENST00000262644.9']	ENST00000262644.9	3UTR	protein_coding	52	chr8	56957931	56963795	-	ENST00000262644.9	3UTR	protein_coding	52	chr8	56957931	56963795	-
Merged-chr8-70608301-1	chr8	70608264	70608338	+	0	{'ENST00000262213.7': '5UTR'}	{'ENST00000262213.7': 'protein_coding'}	{'ENST00000262213.7': 74}	{'ENST00000262213.7': 'chr8'}	{'ENST00000262213.7': 70608200.0}	{'ENST00000262213.7': 70608416.0}	{'ENST00000262213.7': '-'}	ENST00000262213.7	5UTR	protein_coding	74	chr8	70608200	70608416	-	['ENST00000262213.7']	['ENST00000262213.7']	ENST00000262213.7	5UTR	protein_coding	74	chr8	70608200	70608416	-	['ENST00000262213.7']	[]	ENST00000262213.7	5UTR	protein_coding	74	chr8	70608200	70608416	-	ENST00000262213.7	5UTR	protein_coding	74	chr8	70608200	70608416	-
Merged-chr8-74825347-1	chr8	74825310	74825384	+	0	{'ENST00000649643.1': 'CDS', 'ENST00000260113.7': 'exon', 'ENST00000523773.1': 'exon', 'ENST00000523860.5': 'Intron'}	{'ENST00000649643.1': 'protein_coding', 'ENST00000260113.7': 'protein_coding', 'ENST00000523773.1': 'protein_coding', 'ENST00000523860.5': 'lncRNA'}	{'ENST00000649643.1': 74, 'ENST00000260113.7': 74, 'ENST00000523773.1': 74, 'ENST00000523860.5': 74}	{'ENST00000649643.1': 'chr8', 'ENST00000260113.7': 'chr8', 'ENST00000523773.1': 'chr8', 'ENST00000523860.5': 'chr8'}	{'ENST00000649643.1': 74825250.0, 'ENST00000260113.7': 74825210.0, 'ENST00000523773.1': 74824786.0, 'ENST00000523860.5': 74818668.0}	{'ENST00000649643.1': 74825522.0, 'ENST00000260113.7': 74825522.0, 'ENST00000523773.1': 74825522.0, 'ENST00000523860.5': 74866517.0}	{'ENST00000649643.1': '+', 'ENST00000260113.7': '+', 'ENST00000523773.1': '+', 'ENST00000523860.5': '-'}	ENST00000649643.1	CDS	protein_coding	74	chr8	74825250	74825522	+	['ENST00000649643.1', 'ENST00000260113.7', 'ENST00000523773.1', 'ENST00000523860.5']	['ENST00000260113.7']	ENST00000260113.7	exon	protein_coding	74	chr8	74825210	74825522	+	[]	[]	ENST00000260113.7	exon	protein_coding	74	chr8	74825210	74825522	+	ENST00000260113.7	exon	protein_coding	74	chr8	74825210	74825522	+
Merged-chr2-171707378-1	chr2	171707341	171707415	+	0	{'ENST00000410079.7': 'exon', 'ENST00000340296.8': 'Intron', 'ENST00000397119.8': 'Intron'}	{'ENST00000410079.7': 'protein_coding', 'ENST00000340296.8': 'protein_coding', 'ENST00000397119.8': 'protein_coding'}	{'ENST00000410079.7': 36, 'ENST00000340296.8': 39, 'ENST00000397119.8': 39}	{'ENST00000410079.7': 'chr2', 'ENST00000340296.8': 'chr2', 'ENST00000397119.8': 'chr2'}	{'ENST00000410079.7': 171707233.0, 'ENST00000340296.8': 171707377.0, 'ENST00000397119.8': 171707377.0}	{'ENST00000410079.7': 171707377.0, 'ENST00000340296.8': 171715327.0, 'ENST00000397119.8': 171712766.0}	{'ENST00000410079.7': '+', 'ENST00000340296.8': '+', 'ENST00000397119.8': '+'}	ENST00000340296.8	Intron	protein_coding	39	chr2	171707377	171715327	+	['ENST00000410079.7', 'ENST00000340296.8', 'ENST00000397119.8']	['ENST00000397119.8']	ENST00000397119.8	Intron	protein_coding	39	chr2	171707377	171712766	+	[]	[]	ENST00000397119.8	Intron	protein_coding	39	chr2	171707377	171712766	+	ENST00000397119.8	Intron	protein_coding	39	chr2	171707377	171712766	+
Merged-chr2-177220020-1	chr2	177219983	177220057	+	0	{'ENST00000677863.1': 'exon', 'ENST00000411529.6': 'exon', 'ENST00000392524.7': 'exon', 'ENST00000679328.1': 'exon', 'ENST00000699296.1': '3UTR', 'ENST00000699297.1': '3UTR', 'ENST00000699342.1': '3UTR', 'ENST00000677043.1': 'Intron', 'ENST00000699431.1': 'Intron'}	{'ENST00000677863.1': 'protein_coding', 'ENST00000411529.6': 'protein_coding', 'ENST00000392524.7': 'protein_coding', 'ENST00000679328.1': 'protein_coding', 'ENST00000699296.1': 'protein_coding', 'ENST00000699297.1': 'protein_coding', 'ENST00000699342.1': 'protein_coding', 'ENST00000677043.1': 'protein_coding', 'ENST00000699431.1': 'protein_coding'}	{'ENST00000677863.1': 74, 'ENST00000411529.6': 74, 'ENST00000392524.7': 74, 'ENST00000679328.1': 74, 'ENST00000699296.1': 74, 'ENST00000699297.1': 74, 'ENST00000699342.1': 74, 'ENST00000677043.1': 74, 'ENST00000699431.1': 74}	{'ENST00000677863.1': 'chr2', 'ENST00000411529.6': 'chr2', 'ENST00000392524.7': 'chr2', 'ENST00000679328.1': 'chr2', 'ENST00000699296.1': 'chr2', 'ENST00000699297.1': 'chr2', 'ENST00000699342.1': 'chr2', 'ENST00000677043.1': 'chr2', 'ENST00000699431.1': 'chr2'}	{'ENST00000677863.1': 177219408.0, 'ENST00000411529.6': 177219408.0, 'ENST00000392524.7': 177219408.0, 'ENST00000679328.1': 177219408.0, 'ENST00000699296.1': 177218667.0, 'ENST00000699297.1': 177219319.0, 'ENST00000699342.1': 177219718.0, 'ENST00000677043.1': 177219314.0, 'ENST00000699431.1': 177219720.0}	{'ENST00000677863.1': 177223920.0, 'ENST00000411529.6': 177223958.0, 'ENST00000392524.7': 177223959.0, 'ENST00000679328.1': 177220085.0, 'ENST00000699296.1': 177221940.0, 'ENST00000699297.1': 177222521.0, 'ENST00000699342.1': 177221940.0, 'ENST00000677043.1': 177222059.0, 'ENST00000699431.1': 177222522.0}	{'ENST00000677863.1': '+', 'ENST00000411529.6': '+', 'ENST00000392524.7': '+', 'ENST00000679328.1': '+', 'ENST00000699296.1': '-', 'ENST00000699297.1': '-', 'ENST00000699342.1': '-', 'ENST00000677043.1': '+', 'ENST00000699431.1': '-'}	ENST00000699431.1	Intron	protein_coding	74	chr2	177219720	177222522	-	['ENST00000677863.1', 'ENST00000411529.6', 'ENST00000392524.7', 'ENST00000679328.1', 'ENST00000699296.1', 'ENST00000699297.1', 'ENST00000699342.1', 'ENST00000677043.1', 'ENST00000699431.1']	[]	ENST00000699431.1	Intron	protein_coding	74	chr2	177219720	177222522	-	[]	['ENST00000699296.1', 'ENST00000699297.1', 'ENST00000699342.1']	ENST00000699296.1	3UTR	protein_coding	74	chr2	177218667	177221940	-	ENST00000699431.1	Intron	protein_coding	74	chr2	177219720	177222522	-
[truncated: 10,887 more rows]
