# Supplementary material for: eIF3 engages with 3’-UTR termini of highly translated mRNAs
Source: bioRxiv preprint, doi:10.1101/2023.11.11.566681, version 4 (2024-11-24)
Supplement: Supplementary File 4 [file 566681_file05.xlsx]

## Sheet: RNA_RPF_TE_DESeq2_ResultsTable_
transcript	baseMean.rpf	log2FoldChange.rpf	lfcSE.rpf	stat.rpf	pvalue.rpf	padj.rpf	baseMean.rna	log2FoldChange.rna	lfcSE.rna	stat.rna	pvalue.rna	padj.rna	baseMean.te	log2FoldChange.te	lfcSE.te	stat.te	pvalue.te	padj.te	Names
NM_000014.6	20188.1	-0.314808	0.0645258	-4.8788	1.06734081799614e-06	1.49807653699073e-05	24072.3	0.464849	0.0752042	6.18116	6.36310086333184e-10	5.02077256323009e-09	28424.4	-0.788372	0.0926705	-8.50725	1.7810410451817e-17	6.52945134477048e-15	A2M
NM_000016.6	600.498	-0.296367	0.110584	-2.68003	0.00736166	0.0279518	1540.56	-0.352997	0.0895992	-3.93974	8.15712677796227e-05	0.000256111	1023.97	0.046928	0.140357	0.334347	0.738118	0.837547	ACADM
NM_000018.4	202.357	0.106959	0.14657	0.729745	0.465546	0.6202	1136.29	-0.150843	0.0932686	-1.6173	0.105814	0.153475	478.813	0.239355	0.156295	1.53143	0.125664	0.26717	ACADVL
NM_000019.4	468.999	-0.31875	0.108586	-2.93548	0.00333037	0.0149947	799.754	-0.195276	0.106782	-1.82874	0.0674393	0.103676	712.392	-0.132568	0.142399	-0.930962	0.351873	0.527841	ACAT1
NM_000021.4	340.941	0.0165073	0.11651	0.141682	0.887332	0.936998	1569.24	-0.0796367	0.0904604	-0.880348	0.378671	0.457041	731.925	0.0897651	0.135001	0.66492	0.506102	0.665661	PSEN1
NM_000026.4	579.71	-0.212341	0.110469	-1.92217	0.0545839	0.133732	2269.11	-0.133419	0.0766068	-1.7416	0.0815782	0.121998	1158.02	-0.0842954	0.126462	-0.666566	0.505049	0.665091	ADSL
NM_000027.4	83.4549	-0.463082	0.202636	-2.28529	0.0222959	0.0679515	186.329	-0.534936	0.176319	-3.03392	0.002414	0.00542329	136.293	0.0662911	0.238225	0.278271	0.780804	0.866396	AGA
NM_000038.6	623.745	0.0384729	0.0959009	0.401174	0.688292	0.797278	1154.03	-0.0365688	0.0878024	-0.41649	0.677052	0.737719	967.067	0.0688488	0.11408	0.603515	0.546166	0.696608	APC
NM_000043.6	38.6057	0.00935423	0.298529	0.0313345	0.975003	0.987094	155.151	-0.637793	0.173973	-3.66604	0.000246338	0.000697777	77.9864	0.680146	0.294183	2.31198	0.0207788	0.0728512	FAS
NM_000044.6	142.309	0.284884	0.159729	1.78355	0.0744964	0.168879	913.56	-0.234947	0.0982477	-2.39137	0.0167856	0.0302831	361.486	0.506365	0.162048	3.12478	0.00177941	0.0109959	AR
NM_000046.5	171.258	-0.71992	0.159296	-4.51938	6.20216166569762e-06	7.21418335542455e-05	1117.5	0.11223	0.0922808	1.21618	0.223916	0.292595	439.199	-0.835821	0.168987	-4.94607	7.57254829283468e-07	2.06639893867903e-05	ARSB
NM_000048.4	65.6166	0.137634	0.224523	0.613006	0.539872	0.683136	387.916	-0.578411	0.141683	-4.08244	4.45652690293725e-05	0.000148213	159.448	0.704875	0.238325	2.95762	0.00310022	0.0168034	ASL
NM_000051.4	881.017	-0.280836	0.0951508	-2.95149	0.00316248	0.0143537	1285.31	0.287956	0.0850282	3.38659	0.000707667	0.00180439	1291.36	-0.577795	0.116626	-4.95424	7.26138985758194e-07	2.00091631631147e-05	ATM
NM_000052.7	190.767	0.342378	0.142238	2.40707	0.0160809	0.0522382	314.302	0.690794	0.162089	4.26183	2.02762242373957e-05	7.28172716769282e-05	287.377	-0.356288	0.201616	-1.76717	0.0772005	0.189225	ATP7A
NM_000053.4	40.8653	0.206076	0.290587	0.709171	0.478218	0.630013	180.758	0.0975289	0.163545	0.596341	0.550947	0.623228	86.1668	0.126435	0.285401	0.443009	0.657759	0.779621	ATP7B
NM_000055.4	629.388	-0.0685588	0.102322	-0.67003	0.502839	0.650774	680.699	0.243857	0.107176	2.2753	0.0228877	0.0398749	870.905	-0.320332	0.136472	-2.34723	0.0189135	0.0676617	BCHE
NM_000057.4	388.574	-0.133025	0.110612	-1.20262	0.229122	0.384514	709.441	-0.157009	0.110783	-1.41726	0.156407	0.215085	600.381	0.0153963	0.14302	0.107651	0.914272	0.94987	BLM
NM_000059.4	400.513	-0.401446	0.108727	-3.69224	0.000222289	0.00160493	509.322	-1.18342	0.120038	-9.85877	6.2813800075668e-23	1.98251645407361e-21	570.712	0.77373	0.143212	5.40267	6.5655585311906e-08	2.5869527820093e-06	BRCA2
NM_000062.3	700.655	0.12805	0.098825	1.29572	0.195072	0.34362	2962.8	-0.0106303	0.0885274	-0.120079	0.904421	0.926295	1447.45	0.130754	0.131146	0.99701	0.318759	0.497018	SERPING1
NM_000067.3	205.634	2.05191	0.162928	12.5939	2.28017342049032e-36	5.65550072205731e-34	986.308	1.6821	0.124344	13.5278	1.07156667870388e-41	9.86870662542245e-40	450.342	0.360046	0.211215	1.70464	0.0882609	0.208114	CA2
NM_000071.3	132.915	0.336859	0.162804	2.0691	0.0385363	0.103233	2058.25	-0.219489	0.0873865	-2.5117	0.012015	0.022544	598.796	0.548666	0.157761	3.47784	0.00050548	0.00409041	CBS
NM_000075.4	871.529	-0.120339	0.0895304	-1.34411	0.178913	0.32287	6083.33	-0.273584	0.0713861	-3.83246	0.000126867	0.00038457	2319.92	0.145137	0.102064	1.42202	0.155021	0.306732	CDK4
NM_000077.5	40.5788	0.404963	0.296129	1.36752	0.171461	0.314031	619.458	-0.804354	0.299167	-2.68865	0.00717418	0.0142654	180.86	1.20655	0.34528	3.49441	0.000475115	0.00390561	CDKN2A
NM_000081.4	105.952	1.07927	0.223459	4.82986	1.36629955867339e-06	1.87349661435654e-05	413.699	2.19584	0.452252	4.85536	1.20169527409972e-06	5.5488690821032e-06	211.545	-1.07138	0.577234	-1.85605	0.0634457	0.164456	LYST
NM_000082.4	49.3663	0.086606	0.252526	0.342959	0.73163	0.828833	468.552	-0.103734	0.141096	-0.735202	0.462216	0.53889	158.286	0.169645	0.256887	0.660387	0.509005	0.667835	ERCC8
NM_000088.4	380.536	0.431125	0.120619	3.57427	0.000351203	0.00234497	2794.45	0.629781	0.095285	6.60944	3.85765132315782e-11	3.5960650110897e-10	1043.38	-0.207928	0.155255	-1.33927	0.180484	0.340457	COL1A1
NM_000089.4	421.141	-0.0792526	0.110256	-0.718806	0.472261	0.625208	1489.29	0.0749586	0.0863283	0.868296	0.385232	0.463764	806.931	-0.165631	0.128219	-1.29178	0.196434	0.359681	COL1A2
NM_000090.4	102.778	0.190133	0.188555	1.00836	0.313279	0.478256	307.509	0.368483	0.142421	2.58728	0.00967367	0.0185864	184.807	-0.193077	0.212531	-0.908463	0.363634	0.537357	COL3A1
NM_000096.4	617.316	-0.140001	0.0996046	-1.40557	0.159852	0.297711	447.913	0.385013	0.144192	2.67014	0.00758194	0.0149667	806.686	-0.533256	0.166492	-3.20289	0.00136058	0.00894437	CP
NM_000097.7	65.0502	0.169821	0.229557	0.739779	0.459434	0.615728	404.952	-0.209964	0.12997	-1.61548	0.106206	0.153965	162.528	0.360927	0.231056	1.56208	0.118269	0.255312	CPOX
NM_000098.3	188.093	-1.20411	0.149414	-8.05883	7.70284214109309e-16	4.95863112792657e-14	506.863	-1.19623	0.1343	-8.90713	5.2369747654125e-19	1.20909551638716e-17	326.02	-0.0158459	0.189649	-0.0835536	0.933411	0.960788	CPT2
NM_000099.4	260.355	-0.222955	0.155738	-1.4316	0.152259	0.287312	2852.04	-0.324785	0.0854915	-3.79904	0.000145259	0.000435623	917.338	0.0930268	0.177978	0.522688	0.601191	0.740144	CST3
NM_000100.4	109.156	0.230534	0.228652	1.00823	0.313344	0.478269	954.648	-0.576733	0.10561	-5.461	4.73469945221197e-08	2.80388701924035e-07	332.249	0.820778	0.252772	3.24711	0.00116585	0.00794058	CSTB
NM_000108.5	1007.34	-0.207079	0.0861786	-2.4029	0.0162656	0.0526759	1639.15	-0.173545	0.0787299	-2.20431	0.0275029	0.047021	1512.97	-0.0432731	0.0989603	-0.437278	0.66191	0.782013	DLD
NM_000110.4	48.3555	0.291844	0.253635	1.15065	0.249878	0.407902	70.5389	0.162847	0.350046	0.465215	0.641778	0.706501	70.8613	0.122187	0.414759	0.294597	0.768302	0.857715	DPYD
NM_000112.4	173.926	-0.894291	0.162149	-5.51525	3.48293388490659e-08	6.72542002033805e-07	548.999	-0.676976	0.120973	-5.59611	2.19219239354266e-08	1.36236027288967e-07	318.867	-0.215784	0.190173	-1.13467	0.256513	0.431817	SLC26A2
NM_000113.3	186.038	-0.0665707	0.14209	-0.468511	0.639419	0.76129	1276.62	0.0134588	0.0873878	0.154012	0.8776	0.90421	490.516	-0.0903951	0.142055	-0.636339	0.524555	0.680888	TOR1A
NM_000117.3	244.022	-0.345817	0.141074	-2.45132	0.0142333	0.0475572	1883.65	-0.645024	0.0800763	-8.05511	7.94044332389525e-16	1.325031997831e-14	688.582	0.302284	0.147683	2.04684	0.0406741	0.120766	EMD
NM_000122.2	199.575	0.245875	0.141688	1.73532	0.0826839	0.183783	1172.68	0.176976	0.0856547	2.06616	0.0388137	0.0635482	483.596	0.0694511	0.14202	0.489022	0.624826	0.756321	ERCC3
NM_000123.4	188.488	-0.177312	0.144632	-1.22595	0.220217	0.374082	545.227	-0.220589	0.107702	-2.04814	0.0405466	0.0660773	334.846	0.0326504	0.157538	0.207254	0.835812	0.900532	ERCC5
NM_000124.4	66.0389	-0.477518	0.225315	-2.11933	0.0340622	0.0942992	104.927	-0.324244	0.212865	-1.52324	0.127699	0.180982	98.6559	-0.157624	0.261501	-0.602768	0.546663	0.697031	ERCC6
NM_000126.4	662.925	0.00886865	0.0977899	0.0906909	0.927738	0.961292	1527.78	-0.204683	0.0809704	-2.52788	0.0114755	0.0216437	1092.92	0.205758	0.111286	1.84891	0.0644713	0.166217	ETFA
NM_000127.3	140.856	-0.415328	0.16008	-2.59449	0.00947302	0.0341685	1120.93	0.182195	0.09442	1.92962	0.0536534	0.0847015	404.841	-0.606527	0.15866	-3.82281	0.000131939	0.00139763	EXT1
NM_000135.4	126.407	-0.0618512	0.17214	-0.359307	0.719365	0.821459	996.346	-0.220948	0.0975184	-2.2657	0.0234696	0.0407623	361.171	0.134471	0.171236	0.785297	0.43228	0.603346	FANCA
NM_000136.3	161.066	-0.140811	0.149158	-0.944039	0.345149	0.509388	804.241	0.0147667	0.0907645	0.162693	0.87076	0.898812	359.459	-0.165361	0.14338	-1.1533	0.248786	0.422511	FANCC
NM_000137.4	72.9488	-0.178237	0.215084	-0.828683	0.407284	0.567425	314.088	-0.642709	0.136247	-4.71722	2.39087583479064e-06	1.03694856715289e-05	151.88	0.459438	0.220826	2.08054	0.0374759	0.113878	FAH
NM_000138.5	433.095	-0.176118	0.108678	-1.62055	0.105114	0.218816	485.692	0.382156	0.121695	3.14028	0.00168786	0.00393678	603.131	-0.568446	0.146138	-3.88978	0.000100334	0.00113103	FBN1
NM_000140.5	120.345	-0.268588	0.171663	-1.56462	0.117671	0.237227	656.642	-0.531704	0.101308	-5.24839	1.53434518053806e-07	8.32041623963592e-07	280.601	0.243095	0.167598	1.45047	0.146928	0.295136	FECH
NM_000141.5	32.0816	0.666983	0.322644	2.06724	0.0387111	0.103609	284.968	1.2099	0.157295	7.69191	1.44955046873338e-14	2.07040030508749e-13	98.6793	-0.57709	0.306112	-1.88522	0.0593996	0.156567	FGFR2
NM_000142.5	72.7529	0.985517	0.22237	4.43187	9.34182904695485e-06	0.000103385	2350.85	1.28281	0.0901311	14.2327	5.74314055059638e-46	6.12625891390832e-44	593.673	-0.337252	0.197305	-1.70929	0.0873972	0.206482	FGFR3
NM_000143.4	926.401	-0.25325	0.091136	-2.77882	0.00545567	0.0219817	1389.29	-0.157508	0.0843964	-1.86629	0.0620002	0.0962379	1365.93	-0.105038	0.111649	-0.94078	0.346817	0.522768	FH
NM_000144.5	53.6559	-0.284359	0.242773	-1.17129	0.24148	0.398669	350.668	-0.113613	0.157697	-0.720451	0.471248	0.547148	137.678	-0.180699	0.265164	-0.68146	0.495581	0.657409	FXN
NM_000146.4	480.193	-0.607459	0.124218	-4.89025	1.00709566168973e-06	1.42736768319824e-05	31213	-0.353183	0.0993445	-3.55513	0.000377785	0.00102597	7316.51	-0.262822	0.170652	-1.5401	0.123535	0.263976	FTL
NM_000152.5	88.4172	0.00270877	0.195042	0.0138881	0.988919	0.995172	658.67	-0.0603829	0.111474	-0.541679	0.58804	0.658439	244.393	0.0618268	0.19552	0.316218	0.751837	0.847299	GAA
NM_000153.4	312.522	-0.348609	0.11937	-2.9204	0.00349582	0.0155733	719.486	-0.167871	0.105293	-1.59433	0.110863	0.159945	515.158	-0.185824	0.142278	-1.30607	0.19153	0.353714	GALC
NM_000156.6	50.9795	0.000230218	0.254414	0.000904897	0.999278	0.999691	622.429	-0.474545	0.127442	-3.72362	0.000196387	0.000569299	193.444	0.456764	0.247585	1.84487	0.0650557	0.167394	GAMT
NM_000157.4	240.075	-0.0486344	0.132205	-0.367871	0.712969	0.817484	965.399	-0.350345	0.110234	-3.17819	0.00148196	0.00350701	485.159	0.29448	0.164779	1.78712	0.0739179	0.18294	GBA
NM_000158.4	276.189	-0.423437	0.128794	-3.2877	0.00101009	0.00569393	354.13	-0.174163	0.136893	-1.27225	0.203284	0.269308	394.236	-0.259479	0.170827	-1.51896	0.128772	0.271877	GBE1
NM_000159.4	60.7614	0.187035	0.251295	0.744283	0.456705	0.613377	456.426	-0.306645	0.11454	-2.6772	0.00742409	0.0147034	168.714	0.486863	0.2345	2.07618	0.0378778	0.114763	GCDH
NM_000165.5	3556.65	0.218196	0.0891815	2.44665	0.0144189	0.0480991	12101.4	0.29561	0.0815272	3.62591	0.000287949	0.000801104	6711.33	-0.0857571	0.128881	-0.665398	0.505796	0.665576	GJA1
NM_000168.6	373.779	0.222681	0.120418	1.84923	0.0644251	0.151449	3539.89	0.645811	0.0765472	8.43676	3.26248009588388e-17	6.24839085636669e-16	1197.18	-0.421922	0.131427	-3.21031	0.00132592	0.00876933	GLI3
NM_000169.3	138.441	0.33594	0.158687	2.117	0.0342597	0.0946323	301.965	0.173131	0.130257	1.32915	0.183799	0.247305	224.557	0.158647	0.171716	0.923889	0.355544	0.530492	GLA
NM_000170.3	624.831	-0.403036	0.103927	-3.87805	0.000105297	0.000843276	1676.64	-0.364146	0.0771214	-4.72172	2.33858010488253e-06	1.01740911429247e-05	1081.53	-0.0513142	0.117407	-0.437061	0.662067	0.782089	GLDC
NM_000175.5	830.553	0.200346	0.0897021	2.23346	0.0255188	0.0751135	3514.06	-0.159993	0.0730693	-2.18961	0.0285527	0.0485205	1716.15	0.353277	0.103411	3.41625	0.000634909	0.00490252	GPI
NM_000176.3	74.4011	-0.836995	0.229815	-3.64204	0.000270486	0.00188982	358.614	-0.578215	0.130506	-4.43056	9.39879739456887e-06	3.60836745530897e-05	163.176	-0.266778	0.236128	-1.1298	0.258559	0.434037	NR3C1
NM_000178.4	202.923	-0.0337806	0.13493	-0.250356	0.802312	0.880336	1101.2	-0.247477	0.107217	-2.3082	0.0209882	0.0369243	471.864	0.205453	0.160121	1.28311	0.199454	0.363555	GSS
NM_000179.3	1953.07	-0.0284286	0.0859617	-0.330713	0.740862	0.836523	2506.48	0.18381	0.0775784	2.36934	0.0178198	0.0319097	2788.37	-0.22126	0.112545	-1.96596	0.0493029	0.138205	MSH6
NM_000181.4	85.9799	0.0498815	0.197482	0.252588	0.800587	0.87946	582.291	-0.118908	0.107172	-1.10951	0.267212	0.341026	225.019	0.151238	0.188667	0.801614	0.422776	0.594042	GUSB
NM_000182.5	1525.8	-0.119235	0.0779403	-1.52983	0.12606	0.249545	3496.24	-0.0849082	0.0663063	-1.28054	0.200354	0.2661	2511.4	-0.0434523	0.0831242	-0.52274	0.601155	0.740144	HADHA
NM_000183.3	781.309	-0.175088	0.0874726	-2.00164	0.0453237	0.116316	1860.69	-0.164202	0.0763975	-2.14932	0.0316093	0.053115	1301.29	-0.0223579	0.0965421	-0.231587	0.816858	0.888627	HADHB
NM_000186.4	80.59	-0.222813	0.208143	-1.07048	0.284405	0.445643	61.4821	0.241852	0.26684	0.906354	0.364748	0.443284	105.982	-0.472633	0.273371	-1.72891	0.0838255	0.200574	CFH
NM_000188.3	596.488	0.0801424	0.114469	0.700122	0.483851	0.634476	2439.62	-0.0615716	0.0959156	-0.641935	0.520915	0.594817	1214.29	0.132631	0.156298	0.848578	0.396116	0.569877	HK1
NM_000189.5	137.89	-0.10693	0.161937	-0.660319	0.509049	0.655892	591.509	-0.541104	0.124529	-4.34522	1.39138282681846e-05	5.16983381022891e-05	286.625	0.422383	0.188626	2.23927	0.0251386	0.0843487	HK2
NM_000190.4	77.3616	-0.319304	0.215063	-1.48469	0.137625	0.267294	508.066	-0.163138	0.121277	-1.34517	0.178571	0.241389	199.035	-0.159498	0.215267	-0.74093	0.458736	0.627863	HMBS
NM_000191.3	108.01	-0.635345	0.183231	-3.46746	0.000525408	0.0032918	464.986	-1.09966	0.130511	-8.42582	3.58219882232237e-17	6.84516768156703e-16	224.865	0.45975	0.203633	2.25774	0.0239617	0.0811626	HMGCL
NM_000194.3	229.736	-0.563672	0.137309	-4.10514	4.04068711059414e-05	0.00036838	608.456	-0.634911	0.103882	-6.11183	9.84966600687515e-10	7.58712389761763e-09	395.909	0.0526576	0.150397	0.350123	0.726246	0.830333	HPRT1
NM_000195.5	44.8888	0.119535	0.275197	0.43436	0.664027	0.778823	657.8	-0.243096	0.104731	-2.32114	0.0202795	0.0358121	194.134	0.300912	0.233905	1.28647	0.19828	0.362019	HPS1
NM_000199.5	44.5847	-0.183789	0.298684	-0.615328	0.538338	0.682062	418.023	-0.68673	0.152567	-4.50118	6.75778324546719e-06	2.68075757740123e-05	141.799	0.535216	0.306055	1.74876	0.080333	0.194422	SGSH
NM_000202.8	123.986	-0.50886	0.181857	-2.79813	0.00513987	0.0209495	5435.29	0.220341	0.072726	3.02974	0.00244764	0.00549008	1320.75	-0.707888	0.157386	-4.49778	6.86656522775464e-06	0.000127812	IDS
NM_000204.5	72.9894	-0.379916	0.213565	-1.77892	0.0752525	0.170227	63.6589	0.190481	0.27719	0.687185	0.491966	0.566744	97.6935	-0.585325	0.284027	-2.06081	0.0393216	0.117993	CFI
NM_000210.4	328.726	-0.5148	0.121748	-4.22842	2.35341154974379e-05	0.000228944	317.405	-0.0577521	0.19533	-0.295664	0.767487	0.815588	446.635	-0.475148	0.238731	-1.99031	0.0465572	0.132715	ITGA6
NM_000213.5	60.5839	0.0221311	0.232958	0.0950005	0.924314	0.959895	209.673	0.339576	0.175956	1.9299	0.0536198	0.0846644	115.109	-0.330681	0.266165	-1.24239	0.214092	0.381412	ITGB4
NM_000214.3	2060.1	0.969734	0.0931049	10.4155	2.10680323985133e-25	2.73333411102558e-23	6186.88	1.37797	0.0928076	14.8476	7.20916286528251e-50	8.43772437024107e-48	3709.65	-0.415707	0.142372	-2.91987	0.00350182	0.0185241	JAG1
NM_000215.4	79.7903	-0.312589	0.212797	-1.46896	0.141845	0.273208	514.699	-0.790863	0.112139	-7.05254	1.75680193729693e-12	1.94796972705279e-11	203.203	0.485616	0.205305	2.36533	0.0180138	0.0650781	JAK3
NM_000232.5	410.748	-0.148606	0.10783	-1.37815	0.168156	0.309368	2198.62	-0.078123	0.0823259	-0.948949	0.342647	0.419814	948.586	-0.0808036	0.121111	-0.667185	0.504654	0.664728	SGCB
NM_000234.3	258.562	0.0675453	0.124812	0.541175	0.588387	0.722883	1737.85	-0.11711	0.0773533	-1.51396	0.130037	0.183833	673.858	0.182054	0.123486	1.47428	0.140405	0.287144	LIG1
NM_000235.4	519.875	-0.571449	0.114046	-5.01071	5.42288461233769e-07	7.99496257619645e-06	1186.4	-0.645111	0.106348	-6.06604	1.31099105157997e-09	9.89939210722616e-09	854.725	0.0643014	0.159346	0.403533	0.686556	0.800365	LIPA
NM_000237.3	1446.16	-0.294493	0.25948	-1.13493	0.256403	0.415417	5558.09	-0.234557	0.272052	-0.862176	0.38859	0.4673	2866.7	-0.0684453	0.353144	-0.193817	0.846319	0.907499	LPL
NM_000249.4	538.18	0.0125859	0.100074	0.125766	0.899917	0.944846	1252.51	-0.198888	0.0853264	-2.33091	0.0197583	0.0349723	890.034	0.200515	0.114824	1.74628	0.0807618	0.195012	MLH1
NM_000251.3	1850.81	-0.229421	0.0864011	-2.65531	0.00792367	0.0298039	1988.88	0.172392	0.0800781	2.1528	0.0313342	0.0527053	2558.66	-0.410795	0.112571	-3.64921	0.000263051	0.00245088	MSH2
NM_000252.3	131.072	0.0397104	0.168915	0.235091	0.814138	0.888064	351.163	0.198695	0.126363	1.57242	0.115854	0.166038	226.78	-0.172855	0.182344	-0.947959	0.343151	0.520128	MTM1
NM_000254.3	278.83	0.099702	0.125479	0.794573	0.426862	0.587136	1049.62	-0.160455	0.0986113	-1.62714	0.103706	0.150912	548.014	0.248563	0.148987	1.66835	0.0952461	0.21973	MTR
NM_000255.4	363.383	-0.155897	0.11582	-1.34603	0.178293	0.322303	598.615	-0.19061	0.116846	-1.63129	0.10283	0.14987	547.376	0.0260678	0.151866	0.17165	0.863712	0.919933	MMUT
NM_000262.3	98.0726	-0.476684	0.186766	-2.55231	0.0107011	0.0376954	804.444	-0.231508	0.0995986	-2.32442	0.0201033	0.0355381	287.055	-0.263545	0.178278	-1.47828	0.139332	0.285908	NAGA
NM_000264.5	132.052	-0.422083	0.175817	-2.40069	0.016364	0.0528726	1168.45	0.729675	0.259293	2.8141	0.00489141	0.0101752	405.244	-1.15856	0.259743	-4.46042	8.17987087038632e-06	0.00014675	PTCH1
NM_000268.4	125.501	-0.131651	0.172731	-0.762177	0.445954	0.604522	1017.31	-0.144328	0.112803	-1.27946	0.200734	0.266518	364.727	0.0102672	0.192584	0.0533129	0.957483	0.974908	NF2
NM_000269.3	700.017	0.165806	0.106609	1.55527	0.119881	0.240647	4076.95	-0.213603	0.0890967	-2.39743	0.0165106	0.0298444	1688.05	0.371604	0.143036	2.59797	0.00937759	0.0400566	NME1
NM_000270.4	108.039	-0.0145692	0.19183	-0.0759482	0.93946	0.966508	404.454	-0.316515	0.123053	-2.57219	0.0101059	0.0193024	211.826	0.291608	0.202658	1.43891	0.150175	0.299781	PNP
NM_000271.5	594.371	0.263599	0.0998856	2.63901	0.0083149	0.0308761	868.268	0.908398	0.113016	8.03776	9.14988166727242e-16	1.51188338843343e-14	871.467	-0.652939	0.145936	-4.47414	7.67179927061995e-06	0.000139415	NPC1
NM_000274.4	399.931	-0.135127	0.104983	-1.28714	0.198046	0.347291	780.161	-0.0215672	0.0929847	-0.231944	0.816582	0.85493	628.773	-0.122741	0.114813	-1.06905	0.285048	0.462572	OAT
NM_000276.4	228.714	-0.242818	0.139759	-1.73741	0.0823144	0.183348	911.488	0.114717	0.0988756	1.16022	0.245961	0.31756	460.442	-0.358773	0.155245	-2.31102	0.020832	0.0730073	OCRL
NM_000281.4	86.6912	0.0634588	0.220961	0.287194	0.773964	0.860378	691.764	-0.431332	0.112487	-3.83449	0.000125825	0.000381824	249.526	0.515041	0.226411	2.2748	0.0229179	0.0784267	PCBD1
NM_000282.4	180.83	0.0777115	0.151062	0.514436	0.606947	0.734978	307.128	0.264226	0.144921	1.82324	0.0682664	0.104749	274.407	-0.19069	0.19082	-0.999319	0.31764	0.49617	PCCA
NM_000284.4	391.271	-0.269259	0.113382	-2.3748	0.0175586	0.0560242	1680.24	-0.186516	0.0813544	-2.29264	0.0218687	0.0383374	813.868	-0.0902628	0.123392	-0.731514	0.464466	0.632387	PDHA1
NM_000285.4	134.649	0.382829	0.170827	2.24103	0.0250243	0.0738384	830.452	0.0536315	0.097948	0.547551	0.584	0.654437	334.748	0.312219	0.173542	1.79909	0.0720042	0.179521	PEPD
NM_000289.6	630.751	0.053281	0.0963118	0.553214	0.580117	0.715746	1950.06	-0.0201916	0.0837804	-0.241007	0.80955	0.849257	1147.5	0.0647422	0.114605	0.564915	0.572132	0.717782	PFKM
NM_000291.4	2027.38	-0.223896	0.0753154	-2.97278	0.00295113	0.013592	5325.77	-0.146501	0.0700385	-2.09172	0.0364635	0.0601562	3484.32	-0.0862593	0.0890095	-0.969102	0.332494	0.510013	PGK1
NM_000292.3	70.2014	-0.30912	0.221111	-1.39803	0.162104	0.300935	267.433	0.0600168	0.157102	0.382025	0.702443	0.760273	138.661	-0.374269	0.245606	-1.52386	0.127544	0.27001	PHKA2
NM_000293.3	393.557	-0.731347	0.109335	-6.68905	2.24625453987497e-11	7.86002677791105e-10	1837.7	-0.0199993	0.0873951	-0.228838	0.818995	0.856712	850.622	-0.720374	0.123798	-5.81895	5.92201481600548e-09	3.44375371921091e-07	PHKB
NM_000297.4	129.799	-0.523033	0.173313	-3.01784	0.00254579	0.0121567	1430.48	-0.342429	0.0880133	-3.89065	9.99749138102843e-05	0.000308604	459.13	-0.179771	0.165739	-1.08466	0.278071	0.454662	PKD2
NM_000302.4	379.759	-0.00159538	0.118648	-0.0134463	0.989272	0.995172	2051	-0.142264	0.0859429	-1.65533	0.0978578	0.143567	880.969	0.135767	0.13813	0.98289	0.325662	0.503665	PLOD1
NM_000303.3	101.115	-0.0375502	0.189481	-0.198174	0.842909	0.90752	644.005	0.0818361	0.100064	0.81784	0.413448	0.492192	255.812	-0.136812	0.180253	-0.758996	0.447855	0.617751	PMM2
NM_000304.4	235.994	0.289158	0.161011	1.79589	0.0725123	0.165701	1920.78	0.192452	0.0931348	2.06638	0.0387923	0.0635256	687.633	0.0967153	0.190635	0.507331	0.611922	0.747354	PMP22
NM_000305.3	2649.08	-0.195361	0.0730614	-2.67393	0.0074967	0.0283878	6147.2	0.0987307	0.0696219	1.4181	0.156162	0.214853	4377.05	-0.301045	0.0871738	-3.45338	0.000553599	0.00439129	PON2
NM_000307.5	91.4387	0.90715	0.193482	4.68856	2.75139799039338e-06	3.53697244710173e-05	1129.2	0.749545	0.0928682	8.07105	6.96937205053796e-16	1.1769719092161e-14	349.984	0.136016	0.178035	0.763984	0.444877	0.615208	POU3F4
NM_000308.4	312.993	-0.00235751	0.117704	-0.0200291	0.98402	0.992375	1227.54	-0.276384	0.0909724	-3.03811	0.00238067	0.00536415	625.743	0.268286	0.132654	2.02245	0.0431298	0.125756	CTSA
NM_000310.4	656.782	-0.248682	0.0953079	-2.60925	0.009074	0.0331403	2907.94	-0.291258	0.068774	-4.235	2.28547768139201e-05	8.11277187072048e-05	1385.08	0.0290765	0.0994968	0.292236	0.770106	0.858933	PPT1
NM_000311.5	112.891	0.541709	0.182647	2.96588	0.0030182	0.0138781	1140.63	0.42821	0.0878995	4.87158	1.10709943018013e-06	5.13740467958588e-06	377.017	0.124297	0.16818	0.739072	0.459863	0.628863	PRNP
NM_000313.4	355.118	-0.555283	0.119531	-4.64553	3.3919918958537e-06	4.26935338175138e-05	759.073	-0.0884199	0.0963521	-0.917675	0.358789	0.436735	572.729	-0.476041	0.135489	-3.51351	0.000442233	0.00371399	PROS1
NM_000314.8	188.689	-0.416709	0.142169	-2.93108	0.00337784	0.0151679	1951.08	-0.00779783	0.0771054	-0.101132	0.919446	0.937808	639.809	-0.412359	0.133998	-3.07736	0.00208842	0.0124772	PTEN
NM_000317.3	129.879	-0.102454	0.173733	-0.589723	0.555376	0.695189	387.911	-0.271228	0.148106	-1.83131	0.0670538	0.103227	233.358	0.158244	0.221298	0.715073	0.474564	0.640654	PTS
NM_000318.3	101.557	-0.280641	0.183087	-1.53283	0.125318	0.248427	675.337	-0.289356	0.0996425	-2.90394	0.00368496	0.00791971	263.08	-0.00750625	0.17344	-0.0432786	0.965479	0.979772	PEX2
NM_000320.3	146.99	-0.157697	0.167496	-0.941496	0.346451	0.510665	1256.71	-0.558763	0.0817935	-6.83139	8.40966846100745e-12	8.46693860464872e-11	441.232	0.419247	0.157296	2.66533	0.00769131	0.034332	QDPR
NM_000321.3	1060.39	-0.0252326	0.0823463	-0.306421	0.759284	0.850261	1658.97	0.55619	0.110228	5.04581	4.51609630662674e-07	2.25190198674222e-06	1578.54	-0.589219	0.139603	-4.22069	2.43552601543866e-05	0.00035913	RB1
NM_000328.3	48.759	0.535099	0.264523	2.02288	0.0430852	0.112003	155.392	0.419932	0.189185	2.21969	0.0264397	0.0453876	89.7102	0.109541	0.290391	0.37722	0.70601	0.815825	RPGR
NM_000329.3	101.531	-1.00581	0.201603	-4.98907	6.06697412715847e-07	8.91337853908142e-06	190.266	-0.81664	0.177673	-4.59631	4.30048194327236e-06	1.76719163635183e-05	157.919	-0.198034	0.246563	-0.803175	0.421873	0.593419	RPE65
NM_000344.4	456.026	-0.228087	0.114997	-1.98341	0.0473218	0.11986	1042.33	-0.3301	0.0962629	-3.42915	0.000605475	0.00156898	750.021	0.096167	0.143618	0.669604	0.50311	0.663821	SMN1
NM_000346.4	205.019	1.31742	0.162792	8.09267	5.83729575552574e-16	3.81596241134485e-14	2291.09	0.973115	0.101849	9.55449	1.24191442035286e-21	3.55973225180732e-20	732.548	0.342077	0.193375	1.76898	0.0768964	0.18876	SOX9
NM_000355.4	305.756	-0.182016	0.120674	-1.50833	0.131471	0.257896	1393.33	-0.29575	0.0863695	-3.42424	0.000616523	0.00159565	653.339	0.111475	0.129645	0.859852	0.38987	0.563938	TCN2
NM_000365.6	1769.46	0.162005	0.0817732	1.98115	0.047575	0.120372	11698.2	-0.256059	0.0877794	-2.91708	0.0035333	0.0076366	4568.96	0.409605	0.124169	3.29877	0.00097111	0.0068637	TPI1
NM_000367.5	104.17	-0.360439	0.185687	-1.94112	0.0522443	0.129391	506.155	-0.252672	0.114451	-2.2077	0.0272653	0.0466527	229.398	-0.125273	0.189266	-0.661886	0.508044	0.667159	TPMT
NM_000368.5	111.599	0.529406	0.184407	2.87087	0.0040935	0.0175498	983.104	0.387329	0.106608	3.63321	0.000279914	0.00078133	341.342	0.134753	0.190256	0.708269	0.478778	0.643766	TSC1
NM_000373.4	344.135	-0.250024	0.121149	-2.06377	0.0390399	0.104119	1083.2	-0.0610896	0.0869078	-0.702924	0.482103	0.557524	630.23	-0.19555	0.129393	-1.51129	0.130715	0.274039	UMPS
NM_000374.5	220.428	0.0973758	0.1381	0.705112	0.48074	0.63176	1064.8	-0.284559	0.0964131	-2.95146	0.00316279	0.00691205	484.141	0.366588	0.153019	2.39569	0.0165889	0.0615388	UROD
NM_000380.4	90.8199	-0.225222	0.196655	-1.14526	0.2521	0.410417	260.906	-0.41555	0.15698	-2.64715	0.0081174	0.015886	160.91	0.175697	0.227911	0.770901	0.440766	0.612074	XPA
NM_000381.4	757.071	0.783384	0.0996249	7.86334	3.74022753324321e-15	2.17526474398896e-13	5071.12	0.974894	0.0919629	10.6009	2.94972913528831e-26	1.15615662432905e-24	1969.83	-0.199427	0.138459	-1.44034	0.149772	0.299189	MID1
NM_000382.3	256.983	-0.430609	0.131475	-3.27522	0.00105578	0.00591587	861.316	-0.263033	0.101237	-2.5982	0.00937136	0.0181034	481.984	-0.176556	0.149504	-1.18095	0.237623	0.409415	ALDH3A2
NM_000386.4	445.286	0.114672	0.104639	1.09588	0.27313	0.433767	1398.84	0.187376	0.0794436	2.3586	0.0183441	0.032772	814.94	-0.0813253	0.108926	-0.746611	0.455299	0.624443	BLMH
NM_000387.6	53.4696	-0.504962	0.250669	-2.01446	0.0439618	0.113756	231.222	-0.627439	0.149496	-4.19704	2.70428606168239e-05	9.39753346053505e-05	111.547	0.130904	0.247101	0.529759	0.596279	0.736968	SLC25A20
NM_000389.5	150.839	-0.152621	0.171501	-0.889916	0.373511	0.536962	5208.9	-0.548641	0.0717013	-7.65176	1.98254695897563e-14	2.79379987011499e-13	1301.94	0.353966	0.152577	2.31991	0.0203456	0.0716821	CDKN1A
NM_000390.4	121.346	0.389071	0.191903	2.02743	0.0426181	0.111165	368.958	0.587265	0.135556	4.33228	1.47575584160108e-05	5.4473037569743e-05	219.401	-0.216721	0.223684	-0.968871	0.33261	0.510013	CHM
NM_000391.4	191.482	-0.169041	0.145579	-1.16116	0.245578	0.403617	1694.25	-0.220282	0.0781174	-2.81988	0.00480418	0.010016	587.295	0.0471553	0.139995	0.336835	0.736241	0.836746	TPP1
NM_000393.5	2805.25	-0.0295056	0.0938268	-0.314469	0.753165	0.845956	8350.23	0.281601	0.0886557	3.17635	0.00149141	0.00352542	5034.71	-0.319611	0.140473	-2.27525	0.0228908	0.0783978	COL5A2
NM_000398.7	490.925	0.010655	0.102939	0.103508	0.91756	0.956108	4920.19	-0.28268	0.0721207	-3.91954	8.87194695742914e-05	0.000276903	1630.46	0.290387	0.109928	2.64161	0.00825138	0.036185	CYB5R3
NM_000399.5	64.0588	1.54138	0.233491	6.60143	4.0720664647997e-11	1.34534882773864e-09	647.089	1.23105	0.129727	9.48956	2.32017724899784e-21	6.45284939845042e-20	213.989	0.309941	0.240594	1.28823	0.197665	0.361229	EGR2
NM_000400.4	147.776	-0.00139276	0.156431	-0.00890337	0.992896	0.997628	1094.44	-0.112938	0.0862163	-1.30994	0.190216	0.254396	407.049	0.109191	0.148105	0.737256	0.460967	0.629759	ERCC2
NM_000404.4	275.686	-0.364348	0.12206	-2.98498	0.00283595	0.0131984	878.103	-0.133733	0.0940253	-1.42231	0.154937	0.213363	507.201	-0.237038	0.131426	-1.80359	0.0712957	0.178387	GLB1
NM_000405.5	120.126	-0.369146	0.176818	-2.08772	0.0368229	0.0996558	1088.67	-0.387066	0.108927	-3.55345	0.000380219	0.00103026	374.024	0.0196213	0.191634	0.10239	0.918447	0.952447	GM2A
NM_000408.5	290.285	-0.0577098	0.121097	-0.47656	0.633676	0.756482	835.981	-0.00126257	0.0945892	-0.0133479	0.98935	0.992176	514.829	-0.0649831	0.132359	-0.490959	0.623455	0.755313	GPD2
NM_000414.4	954.443	-0.0113795	0.0876262	-0.129864	0.896674	0.942849	1663.82	0.184225	0.0767893	2.39909	0.0164357	0.0297282	1457.78	-0.207739	0.10047	-2.06767	0.0386708	0.116247	HSD17B4
NM_000416.3	305.281	-0.324127	0.123237	-2.63012	0.00853554	0.0315564	514.115	-0.0206459	0.110252	-0.18726	0.851457	0.883431	462.32	-0.318079	0.144031	-2.20841	0.0272157	0.0896416	IFNGR1
NM_000426.4	670.483	-0.530096	0.101163	-5.24001	1.60567958913229e-07	2.71356632768589e-06	521.845	0.482513	0.123323	3.91261	9.13051986896728e-05	0.000284342	883.894	-1.0214	0.147803	-6.91052	4.82895559172718e-12	6.16935659840055e-10	LAMA2
NM_000430.4	1019.91	0.398232	0.0883869	4.50556	6.61979726155015e-06	7.6159277362418e-05	5309.81	0.324442	0.0698875	4.64234	3.4448222202844e-06	1.44112946353672e-05	2323.12	0.0663209	0.100651	0.658922	0.509946	0.668377	PAFAH1B1
NM_000431.4	131.799	1.13371	0.183074	6.19265	5.91616342386e-10	1.56889956457268e-08	1372.45	0.847583	0.0809221	10.4741	1.13654931054057e-25	4.20074607014269e-24	449.079	0.258531	0.173369	1.49122	0.135905	0.281284	MVK
NM_000434.4	167.928	0.475393	0.149572	3.17834	0.00148119	0.00785096	1281.88	0.191246	0.0810764	2.35884	0.018332	0.0327574	470.876	0.280132	0.14023	1.99766	0.0457536	0.131061	NEU1
NM_000435.3	1236.67	0.792115	0.0859065	9.22066	2.95271723997471e-20	2.70655048746812e-18	10324.8	1.50909	0.0704851	21.4101	1.0757667648191e-101	3.77728605297107e-99	3661.63	-0.726472	0.105004	-6.91849	4.56496173217468e-12	5.92180881933799e-10	NOTCH3
NM_000436.4	307.077	-0.194638	0.119428	-1.62976	0.103152	0.215959	1019.41	0.0686061	0.086005	0.797699	0.425045	0.503636	573.922	-0.272917	0.124349	-2.19477	0.0281803	0.0920992	OXCT1
NM_000454.5	810.609	0.105271	0.0925363	1.13762	0.255281	0.414395	3772.59	-0.328363	0.0824959	-3.98036	6.88111544680456e-05	0.000219982	1749.11	0.425161	0.118354	3.59228	0.000327793	0.0029435	SOD1
NM_000455.5	39.2013	0.0354456	0.286733	0.123619	0.901617	0.945924	1632.71	-0.14332	0.110855	-1.29286	0.19606	0.261176	398.965	0.156997	0.252419	0.621969	0.533962	0.688119	STK11
NM_000465.4	354.96	-0.381356	0.115283	-3.30799	0.000939667	0.00535058	768.03	-0.248523	0.134713	-1.84483	0.0650628	0.1004	574.373	-0.1454	0.179982	-0.807859	0.419172	0.591016	BARD1
NM_000466.3	200.371	-0.518818	0.153303	-3.38425	0.000713719	0.00424457	346.725	-0.385424	0.125906	-3.06119	0.00220458	0.00499947	305.46	-0.144148	0.178129	-0.809238	0.418378	0.590322	PEX1
NM_000476.3	50.0681	0.240709	0.27136	0.887047	0.375054	0.538262	518.259	-0.288349	0.105618	-2.73012	0.00633111	0.012782	169.842	0.487953	0.231849	2.10462	0.0353248	0.108946	AK1
NM_000484.4	5336.06	-0.112783	0.0673294	-1.6751	0.0939148	0.20166	14948.7	0.0407614	0.0788871	0.516705	0.605362	0.674073	9373.07	-0.162387	0.0988806	-1.64225	0.100538	0.228193	APP
NM_000485.3	84.2153	0.369646	0.197666	1.87005	0.0614763	0.146243	768.907	-0.474328	0.147795	-3.20937	0.00133027	0.00317928	263.431	0.835638	0.244014	3.42455	0.000615829	0.00479441	APRT
NM_000489.6	1266.9	-0.256093	0.0928599	-2.75784	0.00581844	0.0230919	1979.42	0.910028	0.0894144	10.1776	2.49536246572246e-24	8.44514839302939e-23	1885.63	-1.17498	0.128391	-9.15163	5.60792357705589e-20	3.94050096681127e-17	ATRX
NM_000516.7	3650.91	0.0150401	0.0864544	0.173965	0.861893	0.919734	32703.7	0.239954	0.0803878	2.98495	0.00283624	0.00627488	11286	-0.23355	0.124777	-1.87174	0.0612422	0.160271	GNAS
NM_000520.6	332.299	-0.376999	0.118492	-3.18164	0.00146442	0.00778656	1165.34	-0.346434	0.086178	-4.01998	5.82027577079667e-05	0.000189372	634.455	-0.0426557	0.128442	-0.332101	0.739813	0.838567	HEXA
NM_000521.4	466.341	-0.274651	0.104836	-2.61982	0.00879759	0.0323833	864.251	-0.0628822	0.0921486	-0.6824	0.494986	0.569532	723.318	-0.213886	0.118839	-1.79979	0.0718936	0.179409	HEXB
NM_000527.5	905.907	1.84013	0.113569	16.2028	4.81451304616765e-59	2.13688360622799e-56	4636.61	1.76834	0.0832965	21.2294	5.10581565092224e-100	1.65487340347391e-97	2047.06	0.0625588	0.150389	0.415981	0.677424	0.794442	LDLR
NM_000528.4	160.512	0.574248	0.152348	3.76931	0.000163702	0.00122711	1103.5	0.189527	0.100402	1.88768	0.0590685	0.0923678	423.67	0.376056	0.164205	2.29016	0.0220119	0.0761609	MAN2B1
NM_000532.5	501.737	-0.402129	0.104027	-3.86562	0.000110806	0.000881535	955.145	-0.180523	0.0901953	-2.00147	0.0453416	0.0728075	783.772	-0.22808	0.120032	-1.90016	0.0574119	0.153063	PCCB
NM_000533.5	44.4257	0.84795	0.291709	2.90684	0.00365102	0.0160946	341.581	0.76236	0.133982	5.69004	1.27011912191442e-08	8.25234683143626e-08	125.119	0.122856	0.270907	0.4535	0.650188	0.773693	PLP1
NM_000534.5	258.546	0.144526	0.127702	1.13174	0.257744	0.416391	460.397	0.398991	0.117297	3.40155	0.000670058	0.00172047	397.007	-0.260636	0.152456	-1.70958	0.0873431	0.206469	PMS1
NM_000535.7	143.914	-0.844774	0.167869	-5.03235	4.84491597143755e-07	7.23135865258988e-06	831.222	-0.469997	0.103854	-4.52555	6.02374751936223e-06	2.41035709143711e-05	345.509	-0.373237	0.176673	-2.11259	0.0346362	0.107333	PMS2
NM_000543.5	96.6089	-0.678875	0.194129	-3.49702	0.000470481	0.00298313	824.197	-0.240933	0.105321	-2.28759	0.0221612	0.0387774	289.659	-0.452571	0.192139	-2.35543	0.0185011	0.06644	SMPD1
NM_000546.6	395.9	-0.126984	0.111429	-1.13959	0.254457	0.413456	2846.64	-0.74332	0.0699287	-10.6297	2.16844296661333e-26	8.66041179130356e-25	1071.68	0.602962	0.108666	5.54876	2.87698452851338e-08	1.33289744749587e-06	TP53
NM_000548.5	234.409	0.0972939	0.135892	0.715964	0.474014	0.62684	1311.17	0.305993	0.0927318	3.29976	0.000967674	0.00239278	553.677	-0.219065	0.149845	-1.46194	0.143756	0.291383	TSC2
NM_000551.4	73.5057	-0.285489	0.230903	-1.2364	0.216308	0.369107	1697.1	-0.445154	0.113428	-3.92455	8.68912331709198e-05	0.0002717	452.279	0.149561	0.233079	0.641676	0.521084	0.67787	VHL
NM_000553.6	229.404	0.0334445	0.129441	0.258376	0.796116	0.876514	543.328	0.174237	0.117924	1.47753	0.139532	0.195322	381.406	-0.150242	0.154199	-0.974338	0.329889	0.50741	WRN
NM_000581.4	187.612	-0.00569744	0.143719	-0.0396429	0.968378	0.984014	4540.17	-0.614826	0.0871413	-7.05551	1.7197053598645e-12	1.90934875725668e-11	1199.32	0.594734	0.150691	3.94672	7.92305498465905e-05	0.000938303	GPX1
NM_000597.3	1087.93	0.111539	0.0909161	1.22684	0.219883	0.37377	12613.1	-0.423187	0.0891387	-4.74752	2.05928285347641e-06	9.08088781069897e-06	3983.37	0.524849	0.131593	3.98844	6.65092124541478e-05	0.000818404	IGFBP2
NM_000598.5	192.43	0.310803	0.1442	2.15536	0.0311339	0.088223	3192.93	-0.0216583	0.0736388	-0.294116	0.76867	0.816639	913.194	0.337504	0.134249	2.51401	0.0119368	0.0478835	IGFBP3
NM_000599.4	287.102	-0.025459	0.118966	-0.214002	0.830545	0.899793	5944.59	-0.146321	0.0760234	-1.92468	0.0542692	0.0855455	1618.36	0.108007	0.122393	0.882456	0.37753	0.551705	IGFBP5
NM_000602.5	455.685	1.45758	0.123139	11.8369	2.51492049998092e-32	4.61050534268242e-30	2681.76	1.72701	0.126632	13.638	2.3806517447284e-42	2.27974457418479e-40	1105.46	-0.273478	0.196073	-1.39478	0.163083	0.317235	SERPINE1
NM_000610.4	455.075	-0.223093	0.108305	-2.05987	0.0394113	0.104844	1414.44	-0.518104	0.0872752	-5.93644	2.91269222935388e-09	2.10147751855866e-08	829.557	0.284481	0.12583	2.26084	0.0237694	0.080686	CD44
NM_000611.6	252.717	-0.068747	0.134948	-0.509432	0.610449	0.73837	1557.19	-0.0927512	0.0839677	-1.10461	0.26933	0.343158	627.935	0.0148951	0.140891	0.105721	0.915804	0.950618	CD59
NM_000617.3	185.439	0.146719	0.14765	0.993691	0.320374	0.485308	815.97	-0.189249	0.102266	-1.85057	0.064232	0.099318	389.955	0.329929	0.161463	2.04338	0.0410147	0.121343	SLC11A2
NM_000629.3	320.884	-0.173813	0.118834	-1.46265	0.143563	0.275659	1355.98	0.267942	0.101048	2.65163	0.00801049	0.0157216	662.815	-0.449186	0.148893	-3.01684	0.00255426	0.0145426	IFNAR1
NM_000636.4	238.075	-0.00859297	0.132598	-0.0648048	0.948329	0.971603	1895.16	-0.380261	0.0848723	-4.48039	7.45074440397368e-06	2.92851786811037e-05	684.27	0.371298	0.139363	2.66425	0.00771606	0.0344243	SOD2
NM_000637.5	411.512	-0.1449	0.113889	-1.27229	0.20327	0.353657	1971.27	0.00618887	0.0830213	0.0745456	0.940576	0.95509	900.228	-0.154305	0.129478	-1.19174	0.233362	0.405106	GSR
NM_000640.3	99.3541	-0.77432	0.191371	-4.04617	5.20618717356847e-05	0.000461659	91.3562	-0.0260453	0.228857	-0.113806	0.909392	0.930142	134.002	-0.758354	0.244557	-3.10092	0.00192919	0.0117536	IL13RA2
NM_000642.3	336.863	-0.0263683	0.111469	-0.236552	0.813004	0.887402	359.84	0.434722	0.137278	3.16673	0.00154162	0.00362883	465.218	-0.472038	0.152417	-3.09702	0.00195476	0.0118494	AGL
NM_000660.7	45.6235	1.13172	0.267887	4.2246	2.39363102430317e-05	0.000232132	925.306	1.24958	0.125952	9.92113	3.36935563133323e-23	1.07145509076397e-21	253.18	-0.129773	0.257036	-0.504881	0.613643	0.748804	TGFB1
NM_000661.5	5317.58	0.0248609	0.0752444	0.330403	0.741096	0.836523	17492.7	-0.451226	0.0740011	-6.09757	1.07694706300219e-09	8.23542005437336e-09	9902.34	0.467685	0.104581	4.47199	7.74959055432258e-06	0.000140526	RPL9
NM_000666.3	41.6008	0.178026	0.277628	0.641241	0.521366	0.667391	267.961	-0.667141	0.154226	-4.32573	1.52029920207076e-05	5.60435755723985e-05	105.889	0.830446	0.276919	2.99888	0.00270975	0.0151717	ACY1
NM_000671.4	1669.66	-0.255644	0.0757512	-3.37479	0.000738724	0.00436251	4588.13	-0.358449	0.065303	-5.48902	4.04180364803744e-08	2.42940651512208e-07	2913.28	0.094948	0.0809767	1.17254	0.240982	0.413168	ADH5
NM_000687.4	726.376	0.155012	0.0953924	1.62499	0.104165	0.217323	5270.33	-0.199709	0.0656633	-3.04141	0.00235474	0.00531425	1977.02	0.345551	0.100796	3.42821	0.000607575	0.00475239	AHCY
NM_000688.6	206.153	0.140096	0.138853	1.00895	0.312998	0.477913	693.789	0.343346	0.0990106	3.46776	0.000524807	0.00137688	387.327	-0.217149	0.145932	-1.48802	0.136746	0.282127	ALAS1
NM_000690.4	142.18	0.319604	0.163764	1.95161	0.0509841	0.127016	692.374	-0.211126	0.105033	-2.01009	0.0444221	0.0715627	313.409	0.512342	0.171352	2.99	0.00278981	0.0155683	ALDH2
NM_000692.5	140.769	-0.551566	0.168337	-3.27655	0.00105084	0.00589603	950.861	-0.740633	0.110641	-6.69404	2.17095882539209e-11	2.08367540109102e-10	367.807	0.188371	0.187715	1.00349	0.315623	0.494304	ALDH1B1
NM_000696.4	354.004	-0.322552	0.114696	-2.81224	0.00491983	0.0202682	1036.29	-0.460218	0.0940752	-4.89202	9.98050889876445e-07	4.67254158277156e-06	631.457	0.130189	0.133239	0.977106	0.328517	0.506223	ALDH9A1
NM_000700.3	1730.65	-0.633484	0.0752654	-8.41666	3.87363998969962e-17	2.84055704635973e-15	3329.73	-0.514982	0.0739171	-6.96702	3.23716858848851e-12	3.47068952865047e-11	2710.9	-0.127383	0.0905252	-1.40716	0.159381	0.312099	ANXA1
NM_000701.8	2442.45	-0.0376983	0.0736702	-0.511718	0.608849	0.736751	5342.6	0.377674	0.0738406	5.11473	3.14192041481316e-07	1.61223158813531e-06	3965.73	-0.424297	0.0953623	-4.44931	8.61455066368132e-06	0.000153244	ATP1A1
NM_000709.4	58.3659	0.486284	0.239209	2.03289	0.042064	0.110061	339.366	-0.40097	0.136085	-2.94647	0.00321421	0.00701704	140.583	0.87804	0.237121	3.70292	0.000213129	0.00207758	BCKDHA
NM_000712.4	133.409	-0.179853	0.164537	-1.09308	0.274357	0.434959	475.481	-0.459789	0.118239	-3.88863	0.000100812	0.00031096	256.351	0.265929	0.177817	1.49552	0.134778	0.279776	BLVRA
NM_000713.3	46.5194	0.0716467	0.276571	0.259054	0.795593	0.876355	250.434	-0.779277	0.152301	-5.1167	3.10925393778922e-07	1.59669000205666e-06	107.739	0.816631	0.278331	2.93402	0.00334598	0.0179132	BLVRB
NM_000722.4	224.755	-0.641332	0.145517	-4.40727	1.04680291195543e-05	0.000113612	467.546	-0.163488	0.114022	-1.43383	0.151622	0.209565	359.678	-0.488177	0.167383	-2.91652	0.00353958	0.0187004	CACNA2D1
NM_000754.4	119.818	0.144984	0.183653	0.789447	0.429851	0.589132	1272.24	-0.377471	0.0947488	-3.98391	6.77905542864064e-05	0.000217131	413.461	0.515588	0.183226	2.81394	0.00489383	0.0241315	COMT
NM_000755.5	71.3567	0.216635	0.219315	0.987783	0.323259	0.487931	672.309	-0.177818	0.105164	-1.69087	0.090862	0.134309	227.692	0.412656	0.200306	2.06013	0.039386	0.118102	CRAT
NM_000757.6	45.1826	-0.28588	0.26445	-1.08103	0.279682	0.440769	302.053	-0.637902	0.134062	-4.75826	1.95265671721069e-06	8.65599061332692e-06	117.385	0.35599	0.247061	1.4409	0.149612	0.299051	CSF1
NM_000783.4	48.9039	0.860813	0.28139	3.05914	0.00221971	0.0108326	452.503	0.411496	0.133213	3.08901	0.00200823	0.00459623	154.305	0.426139	0.275978	1.54411	0.122562	0.262296	CYP26A1
NM_000786.4	3394.81	0.583895	0.0783561	7.45181	9.20688101949265e-14	4.54044606066558e-12	5954.02	1.12576	0.097244	11.5766	5.41208873485841e-31	2.94243043668722e-29	5192.91	-0.549188	0.132785	-4.13591	3.53549741138638e-05	0.000494174	CYP51A1
NM_000788.3	327.665	-0.142493	0.118073	-1.20682	0.227501	0.382764	1088.57	-0.200596	0.113905	-1.76108	0.0782243	0.117735	612.491	0.0492936	0.16131	0.305583	0.759922	0.852536	DCK
NM_000791.4	1031.18	-0.322396	0.0815454	-3.95358	7.69914308653585e-05	0.00064284	6868.97	-0.192771	0.0739072	-2.60829	0.00909956	0.017628	2673.85	-0.138943	0.0975576	-1.42421	0.154385	0.305652	DHFR
NM_000801.5	257.655	0.00344942	0.130512	0.02643	0.978914	0.989474	3986.09	-0.220441	0.0804377	-2.74052	0.00613421	0.0124352	1160.03	0.217389	0.138592	1.56855	0.116752	0.252812	FKBP1A
NM_000819.5	1123.04	-0.186092	0.0919144	-2.02462	0.0429065	0.111745	1733.36	0.136138	0.0794164	1.71423	0.086487	0.128355	1666.66	-0.333045	0.113849	-2.92532	0.00344101	0.0182942	GART
NM_000821.7	194.597	0.182535	0.138246	1.32036	0.186714	0.33338	665.904	0.342497	0.0988923	3.46333	0.000533526	0.00139802	368.049	-0.171629	0.143662	-1.19467	0.232215	0.404303	GGCX
NM_000824.5	54.1599	0.108905	0.242801	0.448538	0.653765	0.772482	120.078	0.631207	0.195026	3.23653	0.00120991	0.00292817	88.2799	-0.538543	0.261937	-2.056	0.0397827	0.118995	GLRB
NM_000827.4	1072.02	-0.099608	0.0855526	-1.16429	0.244307	0.401919	6405.15	-0.170758	0.0679573	-2.51273	0.01198	0.0224996	2620.16	0.0592911	0.0950788	0.6236	0.53289	0.687685	GRIA1
NM_000829.4	329.961	-0.29105	0.124683	-2.33433	0.0195787	0.0610376	586.996	0.12247	0.102521	1.19458	0.232249	0.301892	506.408	-0.421073	0.141065	-2.98496	0.00283618	0.0157437	GRIA4
NM_000834.5	80.3631	0.172123	0.203296	0.846663	0.397183	0.558893	1031.72	0.767552	0.117476	6.53368	6.41732510236082e-11	5.78382873129354e-10	316.091	-0.610293	0.210958	-2.89295	0.00381637	0.019815	GRIN2B
NM_000840.3	61.9596	-1.19182	0.479177	-2.48722	0.0128745	0.0438138	212.168	-0.56241	0.201255	-2.79451	0.00519783	0.0107595	117.204	-0.550447	0.35555	-1.54816	0.121584	0.260533	GRM3
NM_000848.4	121.478	0.0328399	0.175887	0.18671	0.851888	0.912634	547.247	-0.223201	0.114241	-1.95378	0.0507273	0.0806716	258.235	0.235179	0.18737	1.25515	0.209423	0.376158	GSTM2
NM_000849.5	92.4847	-0.101105	0.200357	-0.504623	0.613823	0.741282	198.776	0.0371435	0.156562	0.237244	0.812468	0.851469	149.354	-0.154077	0.221545	-0.695464	0.486764	0.649809	GSTM3
NM_000850.5	68.239	-0.0891947	0.221172	-0.403282	0.686741	0.796162	351.127	-0.219348	0.130648	-1.67893	0.0931654	0.137376	154.522	0.105466	0.219922	0.479563	0.631538	0.760842	GSTM4
NM_000852.4	1363.48	0.329221	0.0898286	3.66499	0.000247351	0.0017573	12174.7	-0.143641	0.0824396	-1.74238	0.0814415	0.121859	4205.72	0.464718	0.125008	3.7175	0.000201206	0.00197505	GSTP1
NM_000855.3	147.023	-0.699734	0.16619	-4.21045	2.54857314504451e-05	0.000244785	976.471	0.611591	0.144784	4.22415	2.39847195013965e-05	8.47460089049342e-05	380.682	-1.31687	0.228103	-5.77314	7.78084172697879e-09	4.28810832953498e-07	GUCY1A2
NM_000857.5	36.5749	0.154775	0.297305	0.520592	0.602651	0.732299	87.9612	0.245406	0.253831	0.96681	0.333639	0.410509	61.0921	-0.0914703	0.351883	-0.259945	0.794906	0.875702	GUCY1B1
NM_000858.7	56.514	-0.372132	0.251797	-1.47791	0.139433	0.270121	2945.27	-0.621752	0.0780152	-7.96962	1.59163631713773e-15	2.530701744249e-14	703.116	0.240715	0.202852	1.18665	0.235365	0.407265	GUK1
NM_000859.3	7875.06	0.722958	0.0761752	9.49072	2.29438423485411e-21	2.38870892006478e-19	12645	0.961624	0.0847496	11.3467	7.70550874720905e-30	3.91170615739341e-28	11792	-0.246672	0.117149	-2.10563	0.0352365	0.108723	HMGCR
NM_000875.5	639.568	0.433796	0.122119	3.55223	0.00038198	0.00251659	5232.07	1.32197	0.265397	4.9811	6.32227025354478e-07	3.07963996685675e-06	1870.16	-0.885024	0.325111	-2.72222	0.0064845	0.0300425	IGF1R
NM_000876.4	2342.22	-0.377441	0.0725442	-5.20291	1.9619202279706e-07	3.26328861587299e-06	4001.89	0.440262	0.075017	5.86883	4.3887176000076e-09	3.0615664913298e-08	3560.06	-0.826834	0.0923624	-8.95207	3.48872151077853e-19	2.05174426965176e-16	IGF2R
NM_000884.3	1127	0.147683	0.0857957	1.72134	0.0851898	0.188114	3449.3	-0.103735	0.0703194	-1.47519	0.14016	0.196071	2042.86	0.239597	0.0981803	2.44038	0.0146718	0.05608	IMPDH2
NM_000885.6	205.576	-0.31019	0.139107	-2.22987	0.025756	0.0757587	516.955	-0.0755076	0.119329	-0.63277	0.526884	0.600494	348.338	-0.239084	0.164141	-1.45658	0.145232	0.293176	ITGA4
NM_000891.3	106.713	0.157673	0.199109	0.791892	0.428424	0.588159	399.63	0.374375	0.170304	2.19828	0.0279292	0.047634	209.269	-0.222807	0.271166	-0.821663	0.411269	0.583906	KCNJ2
NM_000895.3	630.236	-0.250501	0.0943732	-2.65437	0.0079457	0.0298734	1009.14	-0.171318	0.0948391	-1.80641	0.0708549	0.107993	943.1	-0.086537	0.117667	-0.735443	0.46207	0.630755	LTA4H
NM_000901.5	67.0086	0.156962	0.225675	0.695523	0.486727	0.636861	237.872	0.125082	0.141102	0.886466	0.375366	0.453767	128.59	0.0474396	0.224317	0.211484	0.832509	0.898783	NR3C2
NM_000903.3	994.618	-0.210689	0.0858577	-2.45394	0.0141301	0.0473418	2701.29	-0.282147	0.0947094	-2.97908	0.00289116	0.006388	1728.49	0.0624794	0.126127	0.495369	0.62034	0.753161	NQO1
NM_000904.6	63.9383	-0.280905	0.235273	-1.19395	0.232496	0.388322	462.138	-0.336049	0.116133	-2.89366	0.0038078	0.00815667	173.62	0.0735824	0.2194	0.33538	0.737338	0.837	NQO2
NM_000918.4	1774.33	-0.0167843	0.072178	-0.232541	0.816118	0.889764	11995.2	-0.13879	0.0627761	-2.21087	0.0270448	0.0463225	4639.09	0.112449	0.0773346	1.45406	0.145929	0.293598	P4HB
NM_000921.5	461.124	0.200543	0.108532	1.84777	0.0646351	0.151787	2227.76	0.626642	0.0985845	6.3564	2.06535757977987e-10	1.74922294721658e-09	1013.03	-0.434502	0.145713	-2.9819	0.00286469	0.0158498	PDE3A
NM_000922.4	68.3377	-0.104719	0.237634	-0.440671	0.659451	0.776327	350.075	0.104285	0.136081	0.76634	0.443474	0.522168	154.403	-0.243809	0.24701	-0.987042	0.323622	0.501811	PDE3B
NM_000925.4	479.355	-0.0871168	0.105042	-0.829356	0.406903	0.567212	1239.19	-0.0936277	0.0915976	-1.02216	0.306704	0.38296	819.465	-0.00147498	0.125976	-0.0117084	0.990658	0.993959	PDHB
NM_000930.5	808.436	0.566403	0.0886721	6.38762	1.68488424682823e-10	4.95074176080226e-09	4423.59	0.610917	0.0772331	7.91004	2.57296683674116e-15	4.00783577323803e-14	1888.38	-0.0551485	0.108315	-0.509149	0.610648	0.746731	PLAT
NM_000932.5	102.788	0.1104	0.186748	0.591172	0.554405	0.694327	772.276	0.30498	0.104952	2.90591	0.00366187	0.00788012	285.555	-0.205142	0.186161	-1.10196	0.270481	0.446672	PLCB3
NM_000938.3	1783.11	-0.0475281	0.0909413	-0.522624	0.601236	0.731436	2420.54	0.371487	0.074198	5.0067	5.53706995163691e-07	2.71442050508693e-06	2574.27	-0.428599	0.115032	-3.7259	0.000194616	0.00191259	POLR2B
NM_000941.3	217.123	0.0465983	0.140696	0.331198	0.740495	0.836292	1212.29	-0.122631	0.0952199	-1.28788	0.197789	0.263105	512.33	0.154867	0.156496	0.989587	0.322376	0.500895	POR
NM_000942.5	1755.7	0.0337636	0.0798291	0.422949	0.672332	0.785397	7688.5	-0.231575	0.0873102	-2.65233	0.0079939	0.015699	3683.98	0.258009	0.119285	2.16297	0.0305437	0.0973703	PPIB
NM_000944.5	68.0295	-0.0605388	0.218208	-0.277436	0.781445	0.865956	162.502	0.196097	0.184586	1.06236	0.288072	0.362867	113.418	-0.257424	0.250478	-1.02773	0.304075	0.482673	PPP3CA
NM_000945.4	447.365	0.481342	0.11406	4.22006	2.44234481660908e-05	0.000236196	2086.9	0.799321	0.0848179	9.42397	4.34353817208588e-21	1.17317295436435e-19	966.713	-0.332201	0.134637	-2.46738	0.0136107	0.0528621	PPP3R1
NM_000946.3	335.343	-0.683953	0.124872	-5.47723	4.32030852424984e-08	8.16887035538093e-07	418.607	-0.361302	0.117817	-3.06663	0.00216484	0.00491596	476.18	-0.331152	0.152092	-2.17732	0.029457	0.0949106	PRIM1
NM_000947.5	334.249	-0.1762	0.119483	-1.47469	0.140297	0.271484	430.464	0.172272	0.117377	1.46768	0.142192	0.198333	477.522	-0.354088	0.14545	-2.43442	0.0149155	0.0568911	PRIM2
NM_000964.4	51.5921	1.40344	0.25447	5.51513	3.48512812627502e-08	6.72542002033805e-07	1001.73	1.05316	0.096962	10.8616	1.75623125794274e-27	7.47462667206235e-26	276.597	0.356432	0.219631	1.62287	0.104617	0.234984	RARA
NM_000967.4	4409.79	0.218337	0.0784408	2.78347	0.00537814	0.02169	45720.3	-0.434387	0.06017	-7.21933	5.2245490742956e-13	6.20977081087292e-12	14975.1	0.643394	0.0944865	6.80938	9.80226048036006e-12	1.16412197704783e-09	RPL3
NM_000968.4	7025.05	0.0602863	0.0661362	0.911549	0.362006	0.526953	38128	-0.234057	0.0741254	-3.15758	0.00159086	0.00373327	16336.5	0.286191	0.0929877	3.07772	0.00208588	0.0124772	RPL4
NM_000969.5	6419.67	0.0872337	0.0855498	1.01968	0.307879	0.472148	18989	-0.24031	0.0655671	-3.6651	0.000247242	0.000699869	11492.8	0.319145	0.110689	2.88325	0.0039359	0.0203355	RPL5
NM_000970.6	5992.68	0.0947945	0.0678004	1.39814	0.162071	0.300935	30101	-0.249456	0.0800047	-3.11801	0.00182074	0.00420285	13410.6	0.336383	0.103114	3.26224	0.00110535	0.00759601	RPL6
NM_000971.4	6664.08	0.119529	0.0813267	1.46973	0.141634	0.272974	24110.5	-0.390105	0.0763676	-5.10826	3.25147180766304e-07	1.66364012891175e-06	12882.6	0.501958	0.114117	4.39864	1.0893169549064e-05	0.000186311	RPL7
NM_000972.3	4878.41	0.382843	0.0855853	4.47324	7.70446864139397e-06	8.65136938120844e-05	30263.6	-0.363543	0.0672164	-5.40855	6.35379305886485e-08	3.66234022620069e-07	12164.4	0.737629	0.112038	6.58376	4.58698098034757e-11	4.75781491078355e-09	RPL7A
NM_000975.5	3896.42	0.0603935	0.0850397	0.71018	0.477592	0.629893	14848.5	-0.401389	0.0839558	-4.78096	1.74463922190015e-06	7.80364900369033e-06	7696.12	0.453917	0.127209	3.56827	0.000359343	0.00317276	RPL11
NM_000976.4	1586.81	0.0806342	0.0861533	0.935938	0.349305	0.513992	13619.9	-0.340749	0.100917	-3.37654	0.000734048	0.00186545	4775.57	0.416022	0.145499	2.85929	0.00424595	0.0215934	RPL12
NM_000977.4	1386.08	0.301454	0.0974116	3.09464	0.00197053	0.00983282	34768	-0.432062	0.0843616	-5.12155	3.03034302269491e-07	1.559017133837e-06	9127.68	0.724815	0.138972	5.21554	1.83282698461576e-07	6.0844083205827e-06	RPL13
NM_000978.4	3026.65	0.149565	0.0899565	1.66264	0.0963855	0.205777	16536.2	-0.136165	0.122105	-1.11514	0.26479	0.338653	7062.78	0.280596	0.177331	1.58233	0.113575	0.248164	RPL23
NM_000979.4	1622.45	0.430167	0.0886137	4.8544	1.20751853996079e-06	1.66888655832029e-05	17331.3	-0.367795	0.0987815	-3.72332	0.000196619	0.000569775	5620.89	0.791114	0.146345	5.40582	6.45114107947764e-08	2.55380383014814e-06	RPL18
NM_000980.4	1370.93	0.509042	0.0879355	5.78881	7.0886612334745e-09	1.58985851547581e-07	22792.8	-0.255181	0.105733	-2.41345	0.0158023	0.0286749	6515.77	0.758908	0.153339	4.94923	7.45091080521312e-07	2.04645211431782e-05	RPL18A
NM_000981.4	201.706	0.344726	0.142439	2.42016	0.0155136	0.0507865	20105.3	-0.265341	0.104995	-2.52717	0.0114987	0.0216728	4589.3	0.600576	0.173591	3.45972	0.000540735	0.00431487	RPL19
NM_000982.4	2644.06	0.0374807	0.105001	0.356957	0.721124	0.822345	15216.8	-0.286051	0.120422	-2.3754	0.0175298	0.0314707	6337.07	0.317392	0.188713	1.68187	0.0925935	0.215438	RPL21
NM_000983.4	1948.65	0.0479186	0.102034	0.469636	0.638615	0.760655	8026.94	-0.432295	0.0904488	-4.77945	1.7577958808455e-06	7.85416006780754e-06	3979.2	0.47199	0.151946	3.10629	0.00189451	0.0115841	RPL22
NM_000984.6	1172.55	0.503385	0.214875	2.34269	0.0191452	0.0599969	15287.7	-0.326955	0.0960874	-3.40268	0.000667287	0.00171492	4660.76	0.824575	0.187431	4.39937	1.08568048365749e-05	0.000186066	RPL23A
NM_000986.4	2775.33	0.036556	0.0812653	0.449836	0.652829	0.771805	11858.1	-0.347475	0.104856	-3.31382	0.000920293	0.00228905	5760.03	0.377815	0.148373	2.54638	0.0108846	0.0447744	RPL24
NM_000987.5	2574.87	0.190336	0.0833047	2.28481	0.0223238	0.0680117	15015.3	-0.272659	0.129098	-2.11203	0.0346837	0.0576425	6213.64	0.458338	0.181418	2.52642	0.011523	0.0465782	RPL26
NM_000988.5	3027.05	0.00999415	0.0682649	0.146402	0.883604	0.935052	9997.75	-0.543411	0.0873841	-6.21864	5.01476020322078e-10	4.03238399165473e-09	5645.33	0.545083	0.111311	4.89695	9.73367466928115e-07	2.56482327535558e-05	RPL27
NM_000989.4	2756.53	0.12822	0.0713036	1.79823	0.0721404	0.165145	10536.8	-0.223821	0.111289	-2.01117	0.0443073	0.0714051	5451.73	0.34227	0.14823	2.30904	0.0209414	0.0732993	RPL30
NM_000990.5	2627.79	0.34042	0.0818672	4.1582	3.2076361586916e-05	0.000300174	21397.2	-0.465146	0.0951744	-4.88729	1.02231055086416e-06	4.78080522315885e-06	7656.86	0.79843	0.136488	5.84983	4.92067004925738e-09	2.9849704931898e-07	RPL27A
NM_000991.5	791.248	0.595447	0.102786	5.79308	6.91062421545926e-09	1.55406117357248e-07	18905.2	-0.307952	0.128865	-2.38973	0.0168607	0.0304056	5006.99	0.89738	0.191982	4.6743	2.94953872547638e-06	6.31231231807535e-05	RPL28
NM_000992.3	1467.19	0.120114	0.0816425	1.47122	0.141231	0.272602	16133	-0.305036	0.0930757	-3.27729	0.0010481	0.0025668	5182.77	0.418798	0.130622	3.20618	0.00134508	0.00885378	RPL29
NM_000993.5	2665.44	0.161109	0.0779947	2.06564	0.0388621	0.103907	10846.7	-0.46179	0.0846639	-5.4544	4.91391378184428e-08	2.89577282794418e-07	5414.12	0.614458	0.119142	5.15735	2.5047074040774e-07	7.90999731504891e-06	RPL31
NM_000994.4	2556.86	0.368556	0.0826327	4.46016	8.18968808649539e-06	9.14750193820074e-05	14076.5	-0.308268	0.108376	-2.84443	0.00444904	0.00935319	5988.82	0.669587	0.152354	4.39495	1.10799110810916e-05	0.000188358	RPL32
NM_000996.4	3326.06	9.97043637567794e-05	0.0878006	0.00113558	0.999094	0.999691	9690.21	-0.331638	0.0883189	-3.75501	0.000173338	0.000508607	5923.5	0.323663	0.135892	2.38177	0.0172297	0.0630285	RPL35A
NM_000997.5	1940.2	0.381889	0.106269	3.5936	0.000326143	0.00220382	9572.96	-0.36625	0.0978634	-3.74246	0.000182229	0.0005321	4303.73	0.741673	0.162201	4.57256	4.81794097869143e-06	9.48265173394913e-05	RPL37
NM_000998.5	2031.93	0.480733	0.102395	4.69489	2.6675135658885e-06	3.43962414390484e-05	18145.1	-0.275228	0.127313	-2.16182	0.0306318	0.0516579	6267.81	0.750979	0.193508	3.88087	0.000104084	0.0011563	RPL37A
NM_000999.4	1670.62	0.114761	0.0836582	1.37178	0.170131	0.312031	5351.22	-0.260257	0.124421	-2.09175	0.0364606	0.0601562	3079.61	0.367707	0.171446	2.14474	0.0319733	0.101011	RPL38
NM_001000.4	1280.6	-0.0607156	0.105672	-0.574565	0.565586	0.704249	6483.09	-0.658231	0.104868	-6.27676	3.4569900593558e-10	2.83661686759409e-09	2876.39	0.591345	0.166983	3.54135	0.000398083	0.00342864	RPL39
NM_001001.5	439.407	0.121829	0.10696	1.13902	0.254696	0.413706	2228.28	-0.195329	0.117185	-1.66685	0.0955445	0.140515	987.932	0.311241	0.168041	1.85217	0.0640017	0.165442	RPL36AL
NM_001001330.3	432.917	-0.317656	0.113264	-2.80456	0.00503854	0.0206262	1541.47	0.274868	0.101031	2.72062	0.00651589	0.0131237	831.694	-0.601364	0.148896	-4.03881	5.37221507556457e-05	0.000689475	REEP3
NM_001001410.3	51.7942	0.113962	0.256007	0.445154	0.656208	0.774175	2010.41	-0.529782	0.0944217	-5.6108	2.0139191644282e-08	1.2562025757688e-07	495.138	0.612706	0.21853	2.80376	0.00505103	0.0247618	TSR3
NM_001001415.4	64.4447	-1.11649	0.243131	-4.59212	4.38757924381338e-06	5.35462456773926e-05	165.755	-1.33636	0.171828	-7.77727	7.41039241240788e-15	1.09942564893242e-13	109.959	0.198399	0.256634	0.773083	0.439473	0.610837	ZNF429
NM_001001433.3	64.3337	0.448352	0.225674	1.98673	0.0469525	0.11919	1788.5	-0.134268	0.0861294	-1.55891	0.119017	0.170021	461.492	0.576802	0.189638	3.04159	0.00235329	0.0137132	STX16
NM_001001436.4	63.3485	0.79935	0.255458	3.12909	0.00175348	0.00900006	585.09	0.357221	0.117044	3.05203	0.002273	0.00514078	199.648	0.459428	0.253141	1.81491	0.0695375	0.175079	C16orf87
NM_001001520.3	342.211	0.421677	0.128436	3.28316	0.00102649	0.00577478	2682.57	-0.228093	0.0975956	-2.33712	0.0194328	0.0344468	974.686	0.641511	0.164276	3.90508	9.41941645002608e-05	0.0010733	HDGFL2
NM_001001563.5	239.975	0.187038	0.145467	1.28578	0.198521	0.347761	1662.29	-0.113421	0.0788259	-1.43888	0.150184	0.20785	636.035	0.302863	0.150391	2.01384	0.0440267	0.127703	TIMM50
NM_001001660.3	47.2503	-0.592734	0.262634	-2.25688	0.0240153	0.0716409	298.15	-0.557045	0.143866	-3.87196	0.000107962	0.000332527	118.915	-0.0382247	0.257803	-0.148271	0.882129	0.930229	ETFRF1
NM_001001664.3	37.6273	0.729339	0.301739	2.41712	0.0156439	0.051114	434.719	0.947719	0.128455	7.37783	1.60885559150603e-13	2.03877083753704e-12	137.522	-0.251146	0.27194	-0.923535	0.355728	0.530509	SPOPL
NM_001001701.4	53.6711	0.276877	0.244796	1.13105	0.258033	0.416618	1826.82	-0.37915	0.0906254	-4.18371	2.8679013435946e-05	9.90889898420324e-05	457.521	0.653627	0.204094	3.20258	0.00136202	0.00894437	C4orf3
NM_001001790.3	135.467	0.0183339	0.168438	0.108847	0.913324	0.953344	2444.43	-0.253813	0.113854	-2.22928	0.0257953	0.0443445	685.481	0.268669	0.19719	1.36249	0.173045	0.330116	TOMM5
NM_001001852.4	42.5967	0.476044	0.282871	1.6829	0.0923936	0.19979	1673.95	-0.00574042	0.0878619	-0.0653346	0.947908	0.960208	411.805	0.410502	0.224674	1.8271	0.0676846	0.171905	PIM3
NM_001001872.4	212.459	0.120405	0.132906	0.90594	0.364968	0.529373	364.586	0.711378	0.14148	5.02812	4.95302728570707e-07	2.45091960872892e-06	323.252	-0.602481	0.173592	-3.47068	0.000519152	0.00417301	ARMH4
NM_001001973.3	1530.86	-0.201036	0.0807024	-2.49108	0.0127356	0.0433937	2638.48	-0.0482721	0.07903	-0.610808	0.541327	0.6138	2331.45	-0.159918	0.10282	-1.55531	0.119872	0.257848	ATP5F1C
NM_001001976.3	127.075	0.610228	0.167937	3.63366	0.000279426	0.00194102	600.401	0.830728	0.117913	7.04526	1.85110439061717e-12	2.04178752614279e-11	276.231	-0.224904	0.184459	-1.21926	0.222744	0.393253	ATE1
NM_001001995.3	1809.21	-0.0542067	0.0768882	-0.705007	0.480806	0.63176	5816.12	-0.123449	0.0826145	-1.49428	0.135103	0.189752	3339.76	0.0609836	0.107715	0.566159	0.571286	0.717255	GPM6B
NM_001001998.3	619.858	0.0896848	0.0961453	0.932806	0.35092	0.515622	1528.55	0.572481	0.0900351	6.35842	2.03836916084999e-10	1.72984258997813e-09	1043.83	-0.492293	0.119548	-4.11794	3.82277629446419e-05	0.000524978	EXOSC10
NM_001002.4	3780.03	-0.17279	0.0747231	-2.3124	0.0207556	0.0641143	44987	-0.291725	0.0622955	-4.68293	2.82803058900584e-06	1.20423515783488e-05	14093.7	0.10915	0.0882731	1.2365	0.216273	0.38481	RPLP0
NM_001002002.3	160.436	-0.0141854	0.156503	-0.09064	0.927779	0.961292	726.701	-0.286478	0.108076	-2.6507	0.00803252	0.0157492	341.857	0.267416	0.171554	1.55879	0.119046	0.256594	GMPR2
NM_001002010.5	214.274	-0.142351	0.141953	-1.0028	0.315956	0.480863	440.098	-0.273887	0.112954	-2.42477	0.0153179	0.0279161	341.623	0.11782	0.157718	0.747029	0.455046	0.624366	NT5C3A
NM_001002030.2	434.204	0.0105443	0.124185	0.0849078	0.932335	0.963459	1516.45	0.0762418	0.0787256	0.96845	0.33282	0.409561	827.737	-0.0837991	0.141392	-0.592674	0.5534	0.702328	ECHDC1
NM_001002248.3	232.651	-0.43548	0.151898	-2.86693	0.00414469	0.0177332	1934.89	-0.357148	0.0770917	-4.63277	3.60811929939551e-06	1.5007710432382e-05	686.714	-0.0957332	0.157789	-0.606717	0.544039	0.695156	ANAPC11
NM_001002257.3	113.201	-0.022909	0.18314	-0.125091	0.900452	0.944937	250.39	-0.47936	0.143455	-3.34154	0.000833161	0.00209459	184.343	0.452405	0.202828	2.23049	0.025715	0.0857868	LCLAT1
NM_001002296.2	169.863	-0.233325	0.151168	-1.54348	0.122715	0.244762	631.711	-0.150071	0.107398	-1.39734	0.162312	0.222118	332.149	-0.0935406	0.163168	-0.573278	0.566456	0.713528	GOLGA7
NM_001002755.4	240.444	0.000930166	0.135815	0.00684876	0.994536	0.998391	502.177	-0.385235	0.117654	-3.27432	0.00105918	0.00259242	385.147	0.381018	0.163366	2.3323	0.0196847	0.0699165	NFU1
NM_001002759.2	84.816	-1.05681	0.214116	-4.93569	7.98687765255775e-07	1.15727387017216e-05	175.817	-0.897365	0.166904	-5.37652	7.5937460966028e-08	4.32966835968009e-07	135.601	-0.148141	0.234233	-0.632449	0.527093	0.683026	SFR1
NM_001002800.3	2650.58	0.00300615	0.0918875	0.0327155	0.973901	0.986773	3910.01	0.368358	0.073968	4.97996	6.35966790652393e-07	3.09427952934626e-06	3894.86	-0.374401	0.123864	-3.02267	0.00250559	0.0144016	SMC4
NM_001002836.4	38.186	0.206348	0.291623	0.707583	0.479204	0.630638	1272.86	0.0642593	0.126663	0.507326	0.611926	0.679676	319.862	0.155255	0.269873	0.575288	0.565096	0.712242	ZNF787
NM_001002847.4	166.646	-0.633937	0.155601	-4.07412	4.6188826395877e-05	0.000415256	1153.32	-0.80757	0.0982771	-8.21728	2.08176273067279e-16	3.67008672204595e-15	441.435	0.165976	0.167747	0.989446	0.322445	0.500895	DERPC
NM_001002860.4	122.021	0.781594	0.180535	4.32933	1.49564836589395e-05	0.000155522	1078.05	1.19691	0.108799	11.0012	3.77168351389187e-28	1.70881596621327e-26	374.029	-0.426035	0.193765	-2.19872	0.0278976	0.0914236	BTBD7
NM_001002909.4	235.433	0.234604	0.140782	1.66643	0.0956271	0.204417	1696.54	0.339947	0.0848526	4.00633	6.16705011040727e-05	0.000199423	638.36	-0.105087	0.1493	-0.703861	0.481519	0.646207	GPATCH8
NM_001002926.2	124.561	-0.663449	0.174104	-3.81064	0.000138606	0.00105876	723.516	-0.490444	0.102417	-4.78868	1.67883543876168e-06	7.54783403423325e-06	299.919	-0.190786	0.175085	-1.08968	0.275856	0.452445	POLR1F
NM_001003.3	1460.7	-0.0862213	0.11254	-0.766137	0.443595	0.602195	23231.4	-0.374873	0.101212	-3.70384	0.000212357	0.000610972	6713.94	0.282054	0.174639	1.61507	0.106295	0.237615	RPLP1
NM_001003681.3	151.249	-0.177408	0.160045	-1.10849	0.267652	0.427605	1189.86	0.24698	0.0815143	3.0299	0.00244634	0.00548863	431.768	-0.428941	0.147848	-2.90122	0.00371713	0.0194193	HMGXB4
NM_001003692.2	45.9914	-0.051807	0.261673	-0.197983	0.843058	0.90752	307.368	-0.385067	0.143259	-2.6879	0.00719021	0.0142905	119.444	0.326574	0.254172	1.28485	0.198843	0.362675	ZMAT5
NM_001003694.2	90.9337	-9.0409e-05	0.194008	-0.000466006	0.999628	0.999691	812.877	0.564397	0.0977437	5.77426	7.72930613070728e-09	5.19416768448726e-08	280.76	-0.577823	0.180705	-3.19761	0.00138572	0.00906471	BRPF1
NM_001003699.4	60.4919	0.0346749	0.229575	0.15104	0.879944	0.932588	686.825	-0.00386781	0.130294	-0.0296852	0.976318	0.98238	218.427	0.040132	0.237838	0.168737	0.866003	0.921173	RREB1
NM_001003703.2	791.188	-0.438788	0.107418	-4.08488	4.40989186669568e-05	0.00039902	1353.49	-0.206965	0.0942635	-2.1956	0.0281204	0.0479115	1202.89	-0.240596	0.145482	-1.65379	0.0981706	0.224451	ATP5PF
NM_001003722.2	133.362	-0.201138	0.186437	-1.07885	0.280654	0.441559	694.307	-0.257074	0.106373	-2.41673	0.0156606	0.0284607	303.729	0.0651917	0.199203	0.327264	0.743469	0.841261	GLE1
NM_001003787.4	116.743	-0.211183	0.172233	-1.22614	0.220145	0.374064	740.778	-0.399238	0.0940487	-4.24501	2.18580074768481e-05	7.79176941655663e-05	294.701	0.182032	0.161674	1.12592	0.260201	0.436186	STRADA
NM_001003795.3	107.25	0.40376	0.192662	2.09569	0.0361097	0.0983251	612.274	0.130223	0.126683	1.02795	0.303973	0.38	255.971	0.268128	0.219873	1.21947	0.222667	0.3932	GTF2IRD2B
NM_001003796.2	287.428	0.113807	0.124766	0.912158	0.361686	0.526696	2346.91	-0.23867	0.0794009	-3.00589	0.00264806	0.00588791	838.947	0.354321	0.130373	2.71775	0.0065728	0.0303183	SNU13
NM_001003800.2	163.665	0.737306	0.156058	4.72455	2.30628180431626e-06	3.02470831349907e-05	1871.4	1.00055	0.0916857	10.9129	1.0003904837848e-27	4.32322595223309e-26	593.972	-0.269728	0.161161	-1.67366	0.0941977	0.218088	BICD2
NM_001003801.2	88.9421	-0.386169	0.204446	-1.88885	0.0589115	0.141498	819.256	-0.0758539	0.098006	-0.773972	0.438947	0.517489	279.751	-0.302914	0.187517	-1.61539	0.106225	0.23758	SMARCD3
NM_001003891.3	186.534	0.702543	0.148875	4.71902	2.36981057129263e-06	3.09359327363943e-05	1565.69	0.271361	0.0942566	2.87896	0.00398991	0.00849494	553.823	0.425608	0.162308	2.62222	0.00873592	0.0377944	MED15
NM_001003897.2	52.7085	0.120173	0.253403	0.474236	0.635331	0.757707	1415.64	-0.261967	0.0868293	-3.01704	0.00255257	0.00569663	367.349	0.328124	0.205707	1.5951	0.110689	0.244328	MANBAL
NM_001004.4	1515.25	0.415831	0.101262	4.10648	4.01742891340067e-05	0.000367053	11720.7	-0.276124	0.103391	-2.67068	0.00756987	0.0149534	4281.72	0.686346	0.16366	4.19374	2.74391369161733e-05	0.000394824	RPLP2
NM_001004019.2	40.5515	-0.168953	0.314988	-0.536378	0.591697	0.725259	272.46	-0.151457	0.162801	-0.930325	0.352203	0.429773	105.645	0.0175378	0.318475	0.0550679	0.956084	0.974018	FBLN2
NM_001004051.4	203.568	-0.694967	0.151682	-4.58174	4.61120946628653e-06	5.60321749700207e-05	504.037	-0.791346	0.123353	-6.41531	1.40538669198613e-10	1.21718331483732e-09	343.236	0.0857607	0.186352	0.460207	0.645368	0.770353	GPRASP2
NM_001004067.4	1093.72	-0.119242	0.110638	-1.07777	0.281137	0.442236	109.634	0.0433375	0.74477	0.0581891	0.953598	0.964702	1280.95	-0.168605	0.750858	-0.22455	0.82233	0.892392	NOMO3
NM_001004106.3	47.1237	-0.501749	0.278624	-1.80081	0.0717332	0.164471	987.79	-0.181661	0.0990322	-1.83437	0.0665996	0.102565	268.248	-0.317488	0.23039	-1.37805	0.168188	0.323929	GRK6
NM_001004127.3	181.264	-0.0489732	0.152774	-0.320561	0.748543	0.842336	861.28	0.299053	0.148326	2.01619	0.04378	0.0706634	395.055	-0.35655	0.226352	-1.5752	0.11521	0.250633	ALG11
NM_001004304.4	43.3101	0.277356	0.268226	1.03404	0.301118	0.464058	648.541	0.295718	0.125612	2.35421	0.0185619	0.033084	190.39	-0.0424601	0.2527	-0.168026	0.866563	0.921536	ZNF740
NM_001004333.5	333.8	-0.142187	0.125311	-1.13467	0.256513	0.415516	1921.13	-0.427097	0.0877014	-4.86991	1.11651646216722e-06	5.17825218859834e-06	799.964	0.281034	0.145755	1.92812	0.0538398	0.146444	RNASEK
NM_001004356.3	71.6033	0.564835	0.232243	2.43209	0.015012	0.0496651	2664.58	0.657519	0.084253	7.8041	5.99290248209416e-15	9.01824807439419e-14	660.209	-0.099188	0.196251	-0.505415	0.613268	0.748563	FGFRL1
NM_001005.5	2903.48	0.351236	0.0877629	4.0021	6.27815696100846e-05	0.000541731	24401.4	-0.436527	0.0722564	-6.04136	1.52823710039643e-09	1.14781230347957e-08	8624.51	0.77869	0.118387	6.5775	4.78435977402947e-11	4.86044838730319e-09	RPS3
NM_001005273.3	327.325	0.244053	0.133453	1.82876	0.0674359	0.157201	3182.15	0.515468	0.0842708	6.11681	9.54690686706124e-10	7.37413237110221e-09	1066.31	-0.27993	0.156185	-1.7923	0.0730851	0.181759	CHD3
NM_001005361.3	413.485	0.257102	0.107163	2.39916	0.0164325	0.0530128	2338.39	0.305806	0.0733296	4.17029	3.04218183733126e-05	0.000104596	982.186	-0.0548834	0.109861	-0.49957	0.617378	0.751944	DNM2
NM_001005373.4	99.1504	0.168161	0.189545	0.887183	0.37498	0.538249	418.999	-0.197804	0.144862	-1.36547	0.172106	0.233699	204.752	0.358706	0.225934	1.58766	0.112363	0.246346	LRSAM1
NM_001005464.3	1751.24	0.666957	0.104401	6.3884	1.67627951108384e-10	4.94268011082868e-09	16.1295	1.03155	0.591704	1.74335	0.0812726	0.121656	2016.06	-0.364614	0.482588	-0.755538	0.449926	0.619521	H3C15
NM_001005743.2	74.62	0.744593	0.211742	3.51651	0.000437258	0.00280624	551.036	0.257233	0.105036	2.44899	0.0143257	0.0263587	205.219	0.500201	0.194764	2.56824	0.0102215	0.0426461	NUMB
NM_001005751.3	497.466	-0.260964	0.104073	-2.50752	0.0121583	0.0417812	729.019	0.154496	0.108255	1.42715	0.153536	0.211793	729.85	-0.425018	0.137136	-3.09925	0.0019401	0.011803	WASHC2A
NM_001006.5	6793.02	0.0609845	0.09813	0.621467	0.534293	0.678977	29753.7	-0.340588	0.0915802	-3.71901	0.000200002	0.000578583	14255.8	0.393503	0.152845	2.57453	0.0100378	0.0420422	RPS3A
NM_001006605.5	35.3224	0.340651	0.311461	1.09372	0.274077	0.434781	118.251	0.414579	0.220532	1.87991	0.0601208	0.0937697	66.2388	-0.0861404	0.345544	-0.24929	0.803137	0.881181	DIPK1A
NM_001006617.3	172.088	-0.335911	0.15367	-2.18593	0.0288206	0.0828592	1994.83	0.116405	0.0726051	1.60327	0.108876	0.157456	630.2	-0.444064	0.138219	-3.21275	0.00131472	0.0087181	MAPKAP1
NM_001006634.3	283.397	0.604917	0.13192	4.58548	4.52944631130457e-06	5.51977178370396e-05	1170.23	0.576516	0.0924833	6.23373	4.55463456112839e-10	3.69056783140663e-09	579.444	0.0137372	0.148598	0.0924455	0.926344	0.957187	ARHGAP17
NM_001006681.2	50.999	-0.19202	0.261033	-0.735615	0.461965	0.618211	165.504	-0.67744	0.204402	-3.31425	0.00091889	0.00228624	94.4791	0.475763	0.311619	1.52675	0.126824	0.269027	SPIN2B
NM_001006935.3	192.316	-0.139711	0.143056	-0.976613	0.328761	0.493229	1027.61	-0.628202	0.109435	-5.74042	9.44439480907953e-09	6.27170331411452e-08	443.661	0.483323	0.169888	2.84495	0.00444187	0.0224275	TCEAL4
NM_001007.5	3788.19	0.206664	0.086636	2.38543	0.0170592	0.0546581	17479.9	-0.275624	0.0832491	-3.31083	0.000930182	0.00230908	8141.77	0.474415	0.127851	3.71068	0.000206703	0.0020243	RPS4X
NM_001007025.2	178.178	0.169488	0.165118	1.02646	0.304673	0.467913	1474.64	-0.0276116	0.0898761	-0.307219	0.758677	0.807806	524.334	0.19896	0.174773	1.13839	0.254958	0.429961	GOSR1
NM_001007157.2	577.382	0.0430713	0.0972925	0.442699	0.657983	0.775463	1048.81	0.547525	0.0924726	5.92094	3.20103624056518e-09	2.29674584096325e-08	891.014	-0.513262	0.117586	-4.36501	1.27119527805034e-05	0.00021109	PHF14
NM_001007228.2	156.395	0.201213	0.163621	1.22975	0.218792	0.372516	738.523	0.109771	0.0934649	1.17447	0.240208	0.31099	339.758	0.0808669	0.163298	0.495211	0.620451	0.753188	SPOP
NM_001007237.3	121.174	0.199956	0.178572	1.11975	0.262821	0.422085	1119.74	0.180329	0.0998117	1.80669	0.0708108	0.107945	381.967	0.0266666	0.181822	0.146663	0.883398	0.931136	IGSF3
NM_001007253.4	46.5566	-0.495254	0.274145	-1.80654	0.0708341	0.162897	482.563	0.496587	0.148952	3.33388	0.000856433	0.00214732	158.115	-0.98516	0.282783	-3.48381	0.000494339	0.00402731	ERV3-1
NM_001007527.2	131.994	-0.327566	0.168135	-1.94823	0.0513879	0.127833	337.391	-0.152611	0.1459	-1.04599	0.295565	0.370919	224.807	-0.186615	0.204254	-0.913643	0.360904	0.534448	LMBRD2
NM_001007553.3	3004.44	-0.199341	0.0710946	-2.80389	0.00504905	0.0206592	12639.2	0.128815	0.0641926	2.0067	0.0447819	0.0720461	6193.24	-0.337032	0.0823401	-4.09317	4.2551203036397e-05	0.000571324	CSDE1
NM_001007559.3	553.681	0.375152	0.116278	3.22633	0.00125388	0.00684842	2678.57	0.0618697	0.0695533	0.88953	0.373718	0.452034	1216.92	0.31292	0.131726	2.37554	0.0175235	0.0637582	SS18
NM_001007561.3	54.5475	0.275587	0.240509	1.14585	0.251856	0.410258	1384.26	0.022085	0.0836664	0.263965	0.791807	0.834383	362.71	0.250382	0.195698	1.27943	0.200745	0.365512	IRGQ
NM_001007563.3	754.146	0.250529	0.103076	2.43052	0.0150771	0.0497828	16427.3	0.113728	0.0940438	1.20931	0.226545	0.295389	4427.83	0.127013	0.148121	0.857497	0.39117	0.564785	IGFBPL1
NM_001008.4	1674.4	-0.00787648	0.0901133	-0.0874063	0.930349	0.962182	5344.94	-0.356759	0.0663829	-5.37426	7.68985681531861e-08	4.37558564366576e-07	3082.7	0.337883	0.109443	3.0873	0.00201986	0.0121605	RPS4Y1
NM_001008212.2	151.206	-0.463602	0.182439	-2.54113	0.0110494	0.0387352	716.292	-0.10757	0.101106	-1.06394	0.287358	0.362184	328.999	-0.38173	0.19764	-1.93144	0.0534289	0.14558	OPTN
NM_001008216.2	64.3716	-0.0161395	0.223898	-0.072084	0.942535	0.968254	406.633	-0.369853	0.120922	-3.0586	0.00222377	0.00503891	162.078	0.348441	0.212471	1.63994	0.101017	0.228891	GALE
NM_001008272.2	155.523	0.94596	0.173586	5.44952	5.05052587418535e-08	9.42280634889493e-07	1270.25	0.118797	0.0905487	1.31197	0.189531	0.253601	454.043	0.799388	0.179738	4.44751	8.68728011476853e-06	0.000154213	TAGLN3
NM_001008388.5	237.656	0.106815	0.130389	0.819206	0.412669	0.573128	832.022	-0.0783956	0.106121	-0.738735	0.460068	0.536973	453.457	0.179618	0.152559	1.17737	0.239048	0.410938	CISD2
NM_001008390.2	206.285	0.321165	0.139506	2.30216	0.0213262	0.0654837	2499.33	0.297204	0.0867175	3.42727	0.000609681	0.0015794	778.935	0.0105341	0.146498	0.0719061	0.942677	0.966284	CGGBP1
NM_001008393.4	43.9876	0.326468	0.272539	1.19787	0.230966	0.386916	812.448	0.202221	0.0960868	2.10456	0.0353293	0.0585716	226.683	0.151479	0.223298	0.678372	0.497536	0.658797	C4orf46
NM_001008395.4	91.0458	0.245565	0.213132	1.15217	0.249251	0.407441	1458.37	-0.552286	0.0953849	-5.79008	7.03546485913314e-09	4.76207729862771e-08	420.633	0.764825	0.202491	3.77709	0.000158673	0.00161978	LAMTOR4
NM_001008397.4	242.265	-0.456413	0.135951	-3.35719	0.000787396	0.00460479	1268.41	-0.354007	0.0826404	-4.2837	1.83808897867263e-05	6.65359786223121e-05	553.304	-0.10072	0.134206	-0.750491	0.452959	0.622551	GPX8
NM_001008661.3	468.143	-0.366233	0.108128	-3.38703	0.00070654	0.00421078	734.664	-0.194789	0.112032	-1.73869	0.08209	0.122676	697.219	-0.178953	0.145185	-1.23259	0.21773	0.386504	KYAT3
NM_001008708.4	56.8554	-0.0468264	0.240785	-0.194474	0.845805	0.909509	195.305	-0.0336694	0.188425	-0.178689	0.858182	0.888779	107.681	-0.0231992	0.283243	-0.0819057	0.934722	0.961402	CHAC2
NM_001008710.3	113.077	0.00174796	0.178803	0.00977592	0.9922	0.997166	764.144	0.420425	0.0928662	4.52721	5.97675040870712e-06	2.39781401974534e-05	295.661	-0.409261	0.166367	-2.45999	0.013894	0.0536668	RBPMS
NM_001008727.5	412.89	-0.666062	0.113255	-5.8811	4.07547595596821e-09	9.46790323324517e-08	1602.55	0.527046	0.102202	5.15693	2.5103732189033e-07	1.31233964737581e-06	822.057	-1.20125	0.149975	-8.00969	1.1499997868812e-15	2.93842369787341e-13	ZNF121
NM_001008895.4	587.646	-0.196352	0.0971414	-2.0213	0.0432482	0.112325	2681.9	0.250292	0.0765359	3.27026	0.00107449	0.00262685	1256.77	-0.455202	0.108186	-4.20759	2.58109297245556e-05	0.000376536	CUL4A
NM_001008938.4	3335.26	-0.0223895	0.0866386	-0.258425	0.796079	0.876514	4054.95	0.557342	0.0770063	7.23761	4.56668621116466e-13	5.4741770556877e-12	4713.6	-0.588819	0.120545	-4.88463	1.03625288418191e-06	2.70516542396962e-05	CKAP5
NM_001009.4	2496.54	0.392154	0.0799571	4.90455	9.36411307414251e-07	1.33843331447871e-05	12381.3	-0.178528	0.0737626	-2.4203	0.0155075	0.028219	5552.47	0.561962	0.106373	5.28296	1.27114055707736e-07	4.50693853647405e-06	RPS5
NM_001009184.2	363.971	0.0898082	0.120148	0.747479	0.454775	0.611661	2918.3	-0.135821	0.0742518	-1.8292	0.0673701	0.1036	1050.8	0.2259	0.128039	1.76431	0.0776801	0.189789	GRINA
NM_001009552.2	697.04	-0.166271	0.0966649	-1.72008	0.0854185	0.188471	3287.4	-0.0865625	0.0796849	-1.08631	0.277342	0.351346	1513.7	-0.0862313	0.117832	-0.731818	0.46428	0.632236	PPP2CB
NM_001009566.3	1319.61	-0.0313448	0.0819824	-0.382335	0.702213	0.809	6711.51	-0.0228985	0.0610187	-0.375271	0.707459	0.764328	2971.35	-0.0142234	0.0854049	-0.166541	0.867731	0.92197	CLSTN1
NM_001009881.3	422.209	0.332863	0.105307	3.16088	0.00157294	0.00823375	1031.22	0.902308	0.108157	8.34261	7.26702438467866e-17	1.342965230037e-15	708.897	-0.578586	0.142018	-4.07402	4.62076786996172e-05	0.000612615	TUT4
NM_001009894.3	139.515	0.0389479	0.169572	0.229683	0.818338	0.891493	328.871	0.0165823	0.15599	0.106304	0.915341	0.934753	231.612	0.0134592	0.222507	0.0604887	0.951766	0.971115	C12orf29
NM_001009899.4	64.8241	-0.73645	0.235494	-3.12725	0.00176448	0.00904	579.067	0.570229	0.119072	4.78893	1.67671183867557e-06	7.54386047224719e-06	200.047	-1.29403	0.226256	-5.71931	1.06954958255499e-08	5.60151681994016e-07	USF3
NM_001009921.3	251.006	-0.274931	0.134138	-2.04961	0.0404029	0.106808	682.113	-0.0621432	0.100952	-0.615572	0.538177	0.610886	436.339	-0.226761	0.148196	-1.53014	0.125983	0.267781	VPS8
NM_001009923.2	93.9059	0.124805	0.210791	0.59208	0.553797	0.693727	2236.72	-0.353112	0.0755169	-4.67594	2.92610330933753e-06	1.24348323690305e-05	592.63	0.501067	0.1827	2.74257	0.00609601	0.0286153	TMEM230
NM_001009944.3	161.206	0.133514	0.151776	0.879675	0.379035	0.542038	2585.94	0.466364	0.0825584	5.64889	1.61486462772226e-08	1.02782962370207e-07	745.963	-0.333893	0.147226	-2.26789	0.0233358	0.0795019	PKD1
NM_001009984.3	162.896	-0.0239149	0.15444	-0.154849	0.87694	0.931156	714.917	-0.286061	0.104274	-2.74337	0.00608113	0.0123394	342.137	0.247333	0.164289	1.50547	0.132202	0.275923	DNAAF9
NM_001009993.4	266.263	0.51055	0.13995	3.6481	0.000264185	0.00185502	6697.56	0.167998	0.0658096	2.55278	0.0106866	0.0202783	1757.75	0.354222	0.134825	2.62728	0.00860704	0.0373711	FAM168B
NM_001009996.3	57.0995	-0.103981	0.241609	-0.430371	0.666926	0.78092	511.322	-0.227125	0.128435	-1.76841	0.0769928	0.116088	176.446	0.0993174	0.239643	0.414438	0.678553	0.795103	DALRD3
NM_001009999.3	1575.94	-0.160785	0.0753734	-2.13318	0.0329101	0.0917762	3422.18	0.218879	0.0692877	3.15898	0.00158321	0.00371635	2553.25	-0.388109	0.0836295	-4.64081	3.47042399921865e-06	7.2335828600274e-05	KDM1A
NM_001010.3	4671.55	0.131403	0.0833333	1.57683	0.114834	0.232989	27913.2	-0.411943	0.0931797	-4.42096	9.82654789444444e-06	3.76059578140251e-05	11418	0.535812	0.136648	3.92112	8.81399202259821e-05	0.00101947	RPS6
NM_001010851.3	99.7186	-1.65617	0.208664	-7.93701	2.07119062534733e-15	1.21294100996903e-13	428.04	-1.65754	0.128947	-12.8544	8.12764698721881e-38	6.28364047351311e-36	207.348	0.00740534	0.219293	0.0337692	0.973061	0.984149	ZNF766
NM_001010853.3	117	0.845327	0.174037	4.85716	1.1908323934662e-06	1.65441343889629e-05	937.291	0.319515	0.108572	2.94288	0.00325172	0.00708984	337.629	0.508779	0.183983	2.76536	0.00568597	0.0270814	PM20D2
NM_001010854.2	47.776	-0.373163	0.275719	-1.35342	0.175922	0.319605	718.393	0.498056	0.104286	4.77587	1.78928351707529e-06	7.9821557429293e-06	210.67	-0.837704	0.237994	-3.51985	0.000431795	0.00364819	TTC7B
NM_001010858.3	41.5894	0.620811	0.28505	2.1779	0.0294132	0.0841675	2468.12	-0.425411	0.0815669	-5.21548	1.83341249400765e-07	9.77858676392561e-07	582.605	1.03843	0.219894	4.72241	2.33064536928609e-06	5.21273256069503e-05	RNF187
NM_001010883.3	50.1167	-0.0924962	0.264525	-0.349669	0.726587	0.825558	504.964	0.220688	0.107765	2.04786	0.0405734	0.0660998	167.029	-0.309904	0.229183	-1.35221	0.176307	0.334524	FAM102B
NM_001010924.2	108.626	-0.213073	0.177508	-1.20036	0.230001	0.38553	2291.83	0.209254	0.0854168	2.44979	0.0142938	0.0263173	621.653	-0.426742	0.163496	-2.61011	0.00905122	0.0389387	FAM171A1
NM_001010942.3	745.633	-0.256021	0.0983817	-2.60232	0.00925949	0.0335418	3422.25	-0.149188	0.0755165	-1.97557	0.0482035	0.077036	1598.7	-0.112077	0.115671	-0.968927	0.332582	0.510013	RAP1B
NM_001010982.5	61.9639	-0.12277	0.252159	-0.486873	0.626348	0.750923	274.076	-0.495656	0.139846	-3.54431	0.00039364	0.00106219	130.64	0.33417	0.254582	1.31262	0.18931	0.35129	AFMID
NM_001011.4	3636.95	0.245279	0.0723621	3.3896	0.000699948	0.00418332	15336.1	-0.331918	0.0897592	-3.69787	0.000217412	0.000624449	7503.13	0.56966	0.119638	4.76152	1.92141774988951e-06	4.52552918074535e-05	RPS7
NM_001011551.3	249.047	-0.337515	0.127227	-2.65285	0.00798157	0.0299949	266.243	-0.054661	0.144546	-0.378156	0.705315	0.762598	343.989	-0.289444	0.161553	-1.79163	0.0731922	0.181784	C1GALT1C1
NM_001011658.4	91.1611	-0.474756	0.208045	-2.28198	0.0224903	0.068297	292.697	-0.854199	0.132634	-6.44026	1.19272880280533e-10	1.0426478860208e-09	168.214	0.346609	0.216061	1.60422	0.108667	0.241252	TRAPPC2
NM_001011663.2	93.5118	-0.500286	0.192824	-2.59452	0.00947222	0.0341685	501.675	-0.118915	0.111653	-1.06504	0.286859	0.361786	216.212	-0.388309	0.189625	-2.04778	0.040582	0.120744	PCGF6
NM_001011713.3	48.757	-0.459551	0.275821	-1.66612	0.0956893	0.204446	659.179	0.0252385	0.124185	0.203233	0.838953	0.873361	198.866	-0.485923	0.25914	-1.87514	0.0607736	0.159342	NAA30
NM_001012.2	2651.1	0.309067	0.0740585	4.17328	3.00241228997078e-05	0.000283214	23144.2	-0.311426	0.0859611	-3.62287	0.000291349	0.000809762	8062.33	0.613022	0.115694	5.29865	1.16661109172879e-07	4.20378834421246e-06	RPS8
NM_001012339.3	232.555	-0.19424	0.13424	-1.44696	0.147908	0.281877	1269.61	0.199369	0.080802	2.46738	0.0136106	0.0252525	542.472	-0.406317	0.130958	-3.10265	0.00191798	0.0117022	DNAJC21
NM_001012426.2	152.874	0.154592	0.159956	0.966465	0.333811	0.498059	3194.58	0.109775	0.0828055	1.3257	0.18494	0.248483	868.224	0.0260129	0.154355	0.168526	0.86617	0.921234	FOXP4
NM_001012507.4	124.292	-0.101409	0.182747	-0.554913	0.578954	0.715044	597.504	-0.224423	0.118907	-1.88738	0.0591086	0.0924134	272.359	0.101091	0.205691	0.491471	0.623093	0.755134	CENPW
NM_001012614.2	164.165	0.192181	0.152931	1.25665	0.20888	0.360057	3704.55	0.0504451	0.0786328	0.641527	0.52118	0.595039	991.729	0.144934	0.146509	0.989247	0.322543	0.500954	CTBP1
NM_001012750.3	220.244	0.385278	0.139009	2.7716	0.0055781	0.0223362	806.137	-0.0292135	0.0987126	-0.295945	0.767272	0.815474	427.778	0.414287	0.150829	2.74674	0.00601914	0.0283539	ABI1
NM_001012754.4	69.8236	-0.255983	0.219137	-1.16814	0.242751	0.399953	370.29	-0.917977	0.138569	-6.62471	3.47931356267698e-11	3.2650529390511e-10	160.463	0.644304	0.229537	2.80697	0.00500099	0.0245828	NHLRC3
NM_001012759.3	39.6526	0.582721	0.304377	1.91447	0.0555602	0.135221	471.923	-0.194643	0.120703	-1.61258	0.106836	0.154824	147.839	0.77435	0.270593	2.86168	0.00421401	0.0214942	CTU2
NM_001012967.3	57.1465	-0.229979	0.245928	-0.935148	0.349712	0.514322	111.474	-0.0670274	0.234419	-0.28593	0.774932	0.821221	89.8516	-0.165858	0.313921	-0.528343	0.597261	0.737459	DDX60L
NM_001012968.3	182.24	-0.176484	0.144177	-1.22408	0.220921	0.374855	873.747	-0.420533	0.120484	-3.49038	0.000482337	0.00127659	398.75	0.236209	0.180042	1.31197	0.189532	0.35147	SPIN4
NM_001012981.5	96.0546	-0.64531	0.19134	-3.37258	0.000744673	0.00438842	480.016	-0.709805	0.110134	-6.44492	1.15663788394094e-10	1.01320035841687e-09	214.385	0.0582577	0.183927	0.316743	0.751438	0.846986	ZKSCAN2
NM_001012991.3	194.604	-0.34211	0.151775	-2.25406	0.0241923	0.0720661	1398.78	-0.18888	0.108345	-1.74332	0.081277	0.121656	526.893	-0.158406	0.183706	-0.862278	0.388534	0.562328	KNOP1
NM_001012994.2	72.5124	0.587001	0.212029	2.7685	0.00563152	0.0225074	913.984	0.854438	0.0963784	8.86546	7.619197894843e-19	1.71676418876583e-17	281.543	-0.282617	0.188482	-1.49943	0.133761	0.278621	SNX30
NM_001013.4	1158.09	0.504042	0.0979883	5.1439	2.69088446767908e-07	4.29891764295164e-06	17399.9	-0.416132	0.075928	-5.48062	4.23838629485676e-08	2.53671032008224e-07	5101.24	0.912184	0.126887	7.18897	6.52823965793665e-13	1.03860597727777e-10	RPS9
NM_001013251.3	876.356	-0.474002	0.086115	-5.50429	3.70663454506235e-08	7.13654089463716e-07	3490.27	-0.621521	0.0757	-8.21031	2.20609608129356e-16	3.873077432721e-15	1763.49	0.140589	0.100263	1.4022	0.160854	0.313819	SLC3A2
NM_001013437.2	452.44	-0.0108275	0.113889	-0.0950704	0.924259	0.959895	824.902	0.340007	0.0964245	3.52614	0.00042166	0.0011284	698.711	-0.356177	0.135459	-2.62942	0.00855319	0.0371947	SEH1L
NM_001013620.4	174.349	-0.599919	0.150669	-3.98171	6.84205920182281e-05	0.000581058	210.966	-0.674456	0.193973	-3.47706	0.000506935	0.0013354	246.121	0.0593794	0.233088	0.254751	0.798916	0.878172	ALG10B
NM_001013627.3	88.7671	-0.263895	0.220661	-1.19593	0.231723	0.387415	730.758	0.58298	0.0960976	6.06654	1.30694554914776e-09	9.87769519521806e-09	260.505	-0.810225	0.203432	-3.98278	6.81134876624377e-05	0.000834786	NHSL2
NM_001013663.2	50.3482	0.291744	0.25762	1.13246	0.257442	0.416196	617.176	-0.270988	0.155297	-1.74496	0.0809916	0.121315	191.654	0.560785	0.28541	1.96484	0.0494325	0.138399	PTRHD1
NM_001013694.3	63.0939	0.0808744	0.227607	0.355325	0.722346	0.823182	666.844	-0.0273776	0.109258	-0.250578	0.80214	0.843584	217.069	0.103676	0.21135	0.490545	0.623749	0.755559	SRRD
NM_001013703.4	337.019	-0.734913	0.116546	-6.3058	2.86718055598161e-10	8.14105509380232e-09	1439.33	0.292853	0.0929081	3.15207	0.00162118	0.00379702	699.437	-1.0371	0.134765	-7.69564	1.40788946278354e-14	3.12403261847127e-12	EIF2AK4
NM_001013836.2	73.1341	-0.00991599	0.219906	-0.0450919	0.964034	0.981255	592.375	-0.250135	0.119466	-2.09379	0.0362791	0.0599223	212.446	0.226285	0.221952	1.01953	0.307953	0.486838	MAD1L1
NM_001013839.4	404.846	0.121696	0.111089	1.09548	0.273305	0.433963	3404.1	-0.00289407	0.0683981	-0.0423122	0.96625	0.974343	1203.14	0.110641	0.111623	0.991205	0.321585	0.50002	EXOC7
NM_001014.5	2639.52	0.251447	0.0980732	2.56387	0.0103511	0.0366401	20243.1	-0.341773	0.0955099	-3.5784	0.000345699	0.000945539	7420.39	0.586517	0.153557	3.81955	0.000133697	0.00140566	RPS10
NM_001014286.3	450.963	-0.36064	0.115897	-3.11173	0.00185997	0.00940918	863.645	-0.0116934	0.0937885	-0.124679	0.900778	0.923799	705.502	-0.350407	0.135774	-2.58081	0.00985681	0.041432	SUPT20H
NM_001014436.3	253.641	0.0163982	0.130813	0.125357	0.900241	0.94493	2908.08	-0.254658	0.0697947	-3.64868	0.000263595	0.000741675	921.719	0.261637	0.12214	2.14211	0.0321843	0.101526	DBNL
NM_001014437.3	561.972	-0.219372	0.0969695	-2.26227	0.0236804	0.071037	1441.35	-0.00895376	0.0915308	-0.0978223	0.922073	0.940147	958.403	-0.220087	0.121781	-1.80724	0.0707251	0.177486	CARS1
NM_001014446.3	95.6047	-0.230421	0.189593	-1.21535	0.224233	0.378943	226.752	-0.305581	0.203246	-1.5035	0.132711	0.186947	159.022	0.0639396	0.276425	0.231309	0.817075	0.888633	OCIAD2
NM_001014809.3	1065.53	0.116564	0.0843528	1.38186	0.167014	0.307895	7864.32	0.0124587	0.063556	0.196027	0.844589	0.877909	2929.1	0.095474	0.0876845	1.08883	0.276227	0.452788	CRMP1
NM_001014840.2	442.083	0.281678	0.109128	2.58116	0.00984681	0.0352604	2809.5	-0.000745744	0.0929648	-0.00802179	0.9936	0.994871	1116.99	0.27352	0.139953	1.95437	0.0506577	0.140302	CUTA
NM_001015.5	2582.23	0.601772	0.0970198	6.20257	5.55483983201298e-10	1.48710997788462e-08	16488.9	-0.393185	0.0802384	-4.9002	9.57375751731753e-07	4.49209658120461e-06	6540.45	0.986913	0.136846	7.21183	5.52064656054547e-13	9.12746898010185e-11	RPS11
NM_001015048.3	255.661	-0.0504961	0.134486	-0.375474	0.707308	0.81297	2050.24	0.191049	0.0751609	2.54186	0.0110264	0.0208621	738.248	-0.247361	0.1338	-1.84874	0.0644953	0.166217	BAG5
NM_001015877.2	615.022	-0.0637649	0.0946102	-0.673974	0.500328	0.648673	1736.48	0.0570428	0.0929389	0.613766	0.53937	0.61191	1083.28	-0.129944	0.123444	-1.05265	0.292499	0.470252	PHF6
NM_001016.4	1663.07	0.0807781	0.0875694	0.922447	0.356295	0.521195	14022.2	-0.598952	0.0767752	-7.80137	6.12366670895518e-15	9.1985988157514e-14	4949.49	0.670736	0.11732	5.71717	1.0831286464445e-08	5.62974911579173e-07	RPS12
NM_001017.3	3156.12	0.0770273	0.0761701	1.01125	0.311895	0.477006	8868.66	-0.156751	0.111249	-1.40901	0.158832	0.218099	5549.71	0.2278	0.151562	1.50301	0.132836	0.277039	RPS13
NM_001017392.5	431.103	-0.442969	0.108321	-4.08941	4.32480479057054e-05	0.000393007	2892.98	0.251697	0.0845507	2.97687	0.00291206	0.00642574	1122.68	-0.70164	0.127071	-5.52165	3.35828933079071e-08	1.51428318915654e-06	SUGP2
NM_001017405.3	247.539	0.223365	0.134549	1.6601	0.0968945	0.206747	2068.45	-0.155713	0.0789258	-1.9729	0.0485068	0.077418	732.776	0.369864	0.136009	2.71941	0.00653983	0.0301827	MAEA
NM_001017420.3	213.921	-0.127421	0.147738	-0.862482	0.388422	0.550608	299.883	0.378327	0.159162	2.37699	0.0174545	0.0313488	310.891	-0.515883	0.20925	-2.46539	0.0136865	0.0530354	ESCO2
NM_001017928.4	136.516	0.0262998	0.162009	0.162335	0.871042	0.926175	331.229	-0.193258	0.149099	-1.29617	0.194916	0.259981	228.731	0.211023	0.205049	1.02914	0.303416	0.482172	MIX23
NM_001017962.3	277.369	-0.317546	0.120796	-2.62879	0.00856896	0.0316384	355.837	0.23933	0.133976	1.78636	0.0740408	0.112341	395.943	-0.564828	0.153466	-3.68047	0.000232806	0.00222171	P4HA1
NM_001017969.3	66.8973	-0.115363	0.229149	-0.503442	0.614653	0.741966	582.231	0.565423	0.126184	4.48096	7.4308279497059e-06	2.92205259599494e-05	203.105	-0.675791	0.230647	-2.92999	0.00338978	0.0180674	KIAA2026
NM_001017979.3	53.1939	-0.276183	0.259827	-1.06295	0.287805	0.448794	409.6	0.170913	0.118882	1.43766	0.15053	0.208295	149.911	-0.450065	0.236719	-1.90126	0.0572677	0.152907	RAB28
NM_001017980.4	171.814	-0.0786801	0.148383	-0.530252	0.595938	0.727625	2082.4	-0.318964	0.0811358	-3.93124	8.45083552814311e-05	0.000264839	648.777	0.240893	0.144742	1.66429	0.0960543	0.221171	VMA21
NM_001017995.3	380.022	0.393511	0.121302	3.24406	0.0011784	0.00648658	3719.54	0.345325	0.0820893	4.2067	2.5913052601619e-05	9.0609665673794e-05	1243.15	0.0435854	0.14067	0.309841	0.756682	0.850817	SH3PXD2B
NM_001017998.4	54.523	0.234311	0.257972	0.90828	0.36373	0.528732	1548.61	-0.125773	0.0968113	-1.29915	0.193892	0.258819	398.33	0.301725	0.220593	1.36779	0.171377	0.327881	GNG10
NM_001018.5	1428.67	0.467906	0.0831555	5.62688	1.83501450580379e-08	3.77431154327886e-07	24496.7	-0.112269	0.225343	-0.498212	0.618334	0.685078	6951.99	0.576488	0.202216	2.85086	0.0043601	0.0221205	RPS15
NM_001018005.2	736.255	-0.031833	0.126649	-0.251348	0.801545	0.880134	2244.64	-0.0211168	0.105965	-0.199282	0.842042	0.876036	1332.64	-0.016662	0.184909	-0.0901094	0.9282	0.958084	TPM1
NM_001018050.4	51.4962	0.194833	0.251951	0.773298	0.439346	0.598063	1420.08	-0.152461	0.101258	-1.50567	0.132153	0.186322	367.021	0.314754	0.221758	1.41936	0.155795	0.307615	POLR3H
NM_001018055.3	113.331	0.0553341	0.175644	0.315036	0.752734	0.845585	502.004	-0.11596	0.10607	-1.09324	0.274288	0.348106	239.039	0.163319	0.170279	0.959129	0.337494	0.51516	BRCC3
NM_001018057.2	159.294	0.12365	0.177813	0.695394	0.486808	0.636868	2339.17	0.113367	0.0741627	1.52862	0.126359	0.179324	690.082	0.0200693	0.171529	0.117002	0.906858	0.945195	DKK3
NM_001018069.2	2757.96	-0.0244136	0.0851651	-0.286662	0.774371	0.860378	11670.6	0.00408442	0.0754056	0.0541661	0.956803	0.967016	5699.32	-0.0375285	0.114955	-0.326462	0.744075	0.841475	SERBP1
NM_001018072.2	315.943	-0.0237685	0.123493	-0.192469	0.847375	0.910307	1990.4	0.203379	0.0935633	2.1737	0.0297276	0.0502637	794.561	-0.231642	0.147112	-1.5746	0.11535	0.250807	BTBD11
NM_001018108.4	148.202	0.192396	0.171064	1.1247	0.260714	0.419748	6507.85	-0.458856	0.0971354	-4.72388	2.31381317118134e-06	1.00871720608097e-05	1580.55	0.646514	0.183297	3.52714	0.000420067	0.00356698	SERF2
NM_001018109.3	199.935	-0.0200668	0.147521	-0.136027	0.8918	0.939834	455.696	-0.0724123	0.140573	-0.515123	0.606467	0.675036	328.566	0.0433119	0.201387	0.215069	0.829714	0.897458	PIR
NM_001018111.3	1432.46	0.0480828	0.0854682	0.562581	0.57372	0.711183	13559.1	-0.156809	0.0637822	-2.45851	0.0139515	0.0257637	4584.69	0.198921	0.0960509	2.07099	0.0383594	0.115806	PODXL
NM_001018113.3	99.6949	-0.198091	0.194727	-1.01728	0.30902	0.47364	132.215	0.524054	0.21912	2.39163	0.0167735	0.0302678	143.218	-0.729555	0.267802	-2.72423	0.00644509	0.0299257	FANCB
NM_001018115.3	684.537	-0.122109	0.102304	-1.1936	0.232636	0.388403	1073.5	-0.144261	0.0904714	-1.59454	0.110814	0.159903	1019.62	0.0140997	0.129821	0.108609	0.913512	0.949431	FANCD2
NM_001019.5	2681.29	0.207654	0.0769924	2.69707	0.00699525	0.0268507	10198.4	-0.166092	0.107019	-1.55199	0.120664	0.17214	5291.99	0.365886	0.14649	2.49768	0.0125008	0.0495799	RPS15A
NM_001020.6	2029.09	0.339051	0.0799266	4.24203	2.21510145489539e-05	0.000218524	16806.2	-0.232576	0.12157	-1.9131	0.0557355	0.0876439	5974.42	0.566148	0.168256	3.36481	0.000765971	0.00571058	RPS16
NM_001020658.2	662.005	0.403832	0.096798	4.1719	3.02071160657376e-05	0.000284599	2066.75	0.630369	0.0926683	6.80243	1.02869865402974e-11	1.02469013052895e-10	1208.93	-0.235266	0.129093	-1.82245	0.0683865	0.173008	PUM1
NM_001021.6	1519.22	0.177437	0.0837328	2.11909	0.0340832	0.0942992	12520.8	-0.393851	0.0811423	-4.85383	1.21098231437893e-06	5.58869001274438e-06	4459.1	0.563209	0.115654	4.86978	1.11720075066328e-06	2.90748047209653e-05	RPS17
NM_001022.4	1913.58	0.610555	0.0938161	6.50799	7.61614004590032e-11	2.4055022100029e-09	28593.9	-0.296826	0.117026	-2.53641	0.0111997	0.0211661	8396.38	0.902069	0.173554	5.19762	2.01855311307703e-07	6.57159839747704e-06	RPS19
NM_001023.4	1980.88	-0.0343709	0.0792562	-0.433669	0.664529	0.779269	15073.9	-0.336512	0.0821569	-4.09597	4.20407992649802e-05	0.000140642	5543.28	0.293826	0.114364	2.56921	0.0101932	0.0425489	RPS20
NM_001023561.4	61.3518	0.163311	0.230539	0.708389	0.478703	0.630274	268.297	1.17046	0.168209	6.95834	3.44294261676048e-12	3.66334311003038e-11	128.687	-1.01316	0.260932	-3.88284	0.000103244	0.00115098	ZNF749
NM_001023563.4	80.4243	-0.487247	0.209207	-2.32902	0.0198582	0.0617266	269.555	0.390316	0.151055	2.58394	0.00976795	0.0187377	150.876	-0.89715	0.229054	-3.91676	8.97470185084512e-05	0.0010324	ZNF805
NM_001023570.4	152.128	0.0908032	0.157118	0.57793	0.563311	0.702307	687.151	-0.0266569	0.110247	-0.241793	0.808941	0.848723	323.774	0.106816	0.17201	0.620988	0.534608	0.688216	IQCB1
NM_001024.4	1213.35	0.230655	0.0775727	2.9734	0.00294522	0.0135721	7429.82	-0.168707	0.124514	-1.35492	0.175444	0.237504	3004.9	0.391467	0.168519	2.32299	0.0201798	0.071225	RPS21
NM_001024211.2	47.4568	-0.171231	0.264628	-0.647061	0.517593	0.663721	323.668	-0.114405	0.157359	-0.727034	0.467205	0.543804	124.7	-0.0847006	0.27915	-0.303423	0.761567	0.853814	S100A13
NM_001024401.3	42.617	0.768065	0.276882	2.77398	0.00553754	0.022216	2799.33	0.725487	0.0851963	8.51548	1.65906032301206e-17	3.30517762222758e-16	656.116	0.0122188	0.222031	0.0550317	0.956113	0.974018	SBK1
NM_001024599.5	1119.56	0.646585	0.104941	6.16144	7.20882407434051e-10	1.88795072729545e-08	5.96572	-1.20463	1.08132	-1.11403	0.265267	0.33916	1288.02	1.84378	1.07059	1.72221	0.0850309	0.202823	H2BC18
NM_001024630.4	89.9883	0.684746	0.193294	3.54251	0.000396335	0.00259294	1229.84	0.0791039	0.125958	0.628016	0.529994	0.602958	369.985	0.601935	0.217676	2.76528	0.00568739	0.0270814	RUNX2
NM_001024674.3	41.7879	0.685561	0.302332	2.26758	0.0233548	0.0703145	558.166	0.344362	0.12732	2.7047	0.00683656	0.0136618	169.049	0.291146	0.27643	1.05324	0.292233	0.470071	LIN52
NM_001024736.2	557.601	0.243575	0.11518	2.11473	0.0344531	0.0948721	6659.76	-0.205854	0.0648037	-3.17659	0.00149019	0.00352451	2084.17	0.440471	0.126535	3.48101	0.000499522	0.00405387	CD276
NM_001024807.3	394.822	0.0647565	0.120955	0.535376	0.59239	0.725546	3923.21	-0.00918449	0.0747246	-0.122911	0.902177	0.924896	1304.28	0.0593462	0.135386	0.438348	0.661134	0.78147	APLP1
NM_001024808.3	57.6794	0.16338	0.237434	0.688106	0.491386	0.640968	993.721	0.0873175	0.0892742	0.978082	0.328034	0.404913	281.691	0.0672487	0.196359	0.342477	0.731992	0.83385	BCL7A
NM_001024924.2	423.345	-0.331032	0.104814	-3.15827	0.00158706	0.00829225	632.173	-0.277905	0.109319	-2.54215	0.0110173	0.0208495	623.613	-0.0611067	0.131725	-0.463895	0.642723	0.768806	EXOC1
NM_001025.5	2728.69	0.303425	0.084909	3.57353	0.000352202	0.00234978	15362.5	-0.320764	0.0804647	-3.98639	6.70862860496282e-05	0.000215346	6464.99	0.61571	0.121077	5.08528	3.67091610519333e-07	1.1008012126441e-05	RPS23
NM_001025091.2	469.36	0.26081	0.107522	2.42564	0.0152812	0.0502718	2514.01	0.235936	0.0699287	3.37395	0.000740976	0.00187909	1084.34	0.0194596	0.108859	0.178759	0.858127	0.915915	ABCF1
NM_001025248.2	565.761	-0.0905588	0.0974582	-0.929207	0.352782	0.517393	1566.16	-0.403765	0.0966395	-4.17806	2.94011942889141e-05	0.000101376	989.662	0.304381	0.130733	2.32827	0.0198978	0.0704063	DUT
NM_001025300.3	93.9218	-0.0800168	0.18987	-0.421429	0.673442	0.786257	736.731	-0.0485688	0.106956	-0.454102	0.649756	0.713512	267.63	-0.0485837	0.187608	-0.258965	0.795663	0.87631	RAB12
NM_001025356.3	357.832	-0.0457786	0.112242	-0.407857	0.683378	0.793355	1259.01	0.308685	0.0888077	3.47589	0.000509169	0.00134003	684.187	-0.361909	0.124267	-2.91234	0.00358729	0.0188814	ANO6
NM_001025595.3	171.629	0.223009	0.148222	1.50456	0.132438	0.25931	490.846	-0.00620846	0.116067	-0.0534903	0.957341	0.967328	303.629	0.218923	0.16431	1.33238	0.182736	0.343245	ARFIP1
NM_001025603.2	49.1517	0.0606303	0.254328	0.238395	0.811575	0.886348	1099.95	0.312081	0.0903662	3.45352	0.000553325	0.00144451	294.963	-0.247239	0.209104	-1.18237	0.237058	0.408852	RFX5
NM_001025780.3	163.861	0.0541952	0.14933	0.362923	0.716662	0.819803	652.284	0.0684868	0.105616	0.648449	0.516695	0.590862	329.755	-0.0244416	0.16019	-0.152579	0.87873	0.928194	ABHD17B
NM_001028.3	2116.63	0.19241	0.074872	2.56985	0.0101742	0.0360803	8619.63	-0.470093	0.101411	-4.63553	3.56024050346984e-06	1.48451987742407e-05	4300.64	0.655772	0.136838	4.79231	1.64868099513888e-06	4.01782605520551e-05	RPS25
NM_001029.5	1944.12	0.11308	0.0889176	1.27174	0.203464	0.35392	12865.1	-0.184565	0.123624	-1.49296	0.135448	0.190173	5023.13	0.292563	0.177955	1.64403	0.100171	0.227543	RPS26
NM_001029858.4	444.323	-0.00559426	0.115108	-0.0486003	0.961238	0.979947	3077.57	0.249722	0.0773373	3.229	0.00124222	0.00299818	1177.8	-0.25563	0.128243	-1.99332	0.0462263	0.131955	SLC35F1
NM_001029896.2	65.4165	0.223604	0.2303	0.970927	0.331584	0.495951	526.293	-0.196999	0.104964	-1.87682	0.0605423	0.0942702	189.23	0.424605	0.205333	2.06788	0.0386511	0.116229	WDR45
NM_001030.6	1582.09	0.278637	0.104136	2.67571	0.00745707	0.0282631	11751	-0.0243382	0.285919	-0.0851226	0.932164	0.948255	4365.9	0.300458	0.303418	0.990244	0.322055	0.500565	RPS27
NM_001030006.2	2646.52	-0.436391	0.073136	-5.96685	2.41878536147133e-09	5.89526501540107e-08	7294.93	-0.0329913	0.0644706	-0.511727	0.608842	0.676875	4623.53	-0.413004	0.0848393	-4.86807	1.12691091665267e-06	2.92372703052779e-05	AP2B1
NM_001030055.2	803.152	-0.494214	0.092618	-5.33605	9.49929679261896e-08	1.67589058268108e-06	1184.24	0.561473	0.133044	4.22021	2.44079139168374e-05	8.60968985254035e-05	1180	-1.06065	0.173259	-6.12174	9.25566799413081e-10	6.24350340212088e-08	ARHGAP5
NM_001031.5	324.432	0.628042	0.121294	5.17785	2.24462458444137e-07	3.66129963647854e-06	10765.2	-0.118785	0.230805	-0.514656	0.606794	0.67531	2706.27	0.745107	0.288658	2.58128	0.00984356	0.041397	RPS28
NM_001031623.3	239.489	-0.235984	0.131582	-1.79344	0.0729029	0.166246	505.324	-0.0981545	0.109418	-0.897061	0.369687	0.447771	384.804	-0.144975	0.146795	-0.987604	0.323347	0.501649	ZNF451
NM_001031684.3	1302.19	-0.582178	0.0988771	-5.8879	3.91134271491015e-09	9.16232030967703e-08	3801.06	-0.706163	0.0683151	-10.3369	4.80026458530457e-25	1.70682825571146e-23	2320.15	0.113097	0.119978	0.942649	0.345861	0.521979	SRSF7
NM_001031685.3	460.665	0.384815	0.101726	3.78285	0.000155041	0.00116842	1510.33	0.424154	0.0816317	5.19594	2.03684007040287e-07	1.07952523731352e-06	856.879	-0.0511017	0.110611	-0.461994	0.644085	0.769651	TP53BP2
NM_001031689.3	657.272	-0.50577	0.0939325	-5.3844	7.26874085345604e-08	1.32391558568455e-06	969.228	-0.032937	0.0925207	-0.355996	0.721843	0.776209	965.584	-0.480096	0.112301	-4.27509	1.91060315444198e-05	0.000291852	PLAA
NM_001031692.3	504.019	0.311348	0.10286	3.02689	0.0024708	0.0118321	906.61	0.767967	0.0889358	8.63507	5.86891028563379e-18	1.22116807350706e-16	775.862	-0.463641	0.115928	-3.99938	6.3509914301185e-05	0.000792183	LRRC17
NM_001031701.3	63.1465	-0.48715	0.23132	-2.10595	0.0352084	0.0964628	277.013	-0.69941	0.147264	-4.74938	2.04044006579682e-06	9.0072228572393e-06	132.584	0.215865	0.238755	0.904126	0.365929	0.539897	NT5DC3
NM_001031702.4	587.004	0.0909202	0.0989699	0.918665	0.358271	0.52344	5472.17	0.167614	0.0782541	2.14192	0.0321997	0.0540424	1860.87	-0.086352	0.116731	-0.73975	0.459451	0.628401	SEMA5B
NM_001031703.3	86.6511	-0.109282	0.194028	-0.563228	0.573279	0.71088	586.537	-0.320797	0.104045	-3.08326	0.00204747	0.00467462	226.712	0.20574	0.182567	1.12693	0.259773	0.435555	ELP6
NM_001031710.3	764.203	-0.0851393	0.0973212	-0.874828	0.381667	0.543701	1746.57	0.184452	0.0840567	2.19438	0.0282081	0.0480222	1256.96	-0.276051	0.119818	-2.30392	0.0212271	0.0740493	KLHL7
NM_001031711.3	256.107	-0.31803	0.143202	-2.22085	0.0263611	0.0770548	5836.52	-0.08175	0.0706411	-1.15726	0.247167	0.318921	1559.35	-0.230764	0.144513	-1.59684	0.1103	0.243838	ERGIC1
NM_001031712.3	163.466	-0.178455	0.155365	-1.14862	0.250715	0.40903	381.392	-0.234566	0.13265	-1.76831	0.0770095	0.116093	270.491	0.0467333	0.184629	0.25312	0.800175	0.878754	TRMT11
NM_001031713.4	102.91	-0.357584	0.188489	-1.89711	0.0578137	0.139777	2135.73	-0.0646632	0.0802041	-0.806234	0.420108	0.498557	581.152	-0.284042	0.16477	-1.72386	0.0847323	0.202283	MCUR1
NM_001031722.4	120.821	0.354517	0.168858	2.0995	0.0357732	0.0976928	406.815	0.24167	0.136598	1.76921	0.0768591	0.115949	227.042	0.104707	0.196962	0.531612	0.594995	0.735845	ATAT1
NM_001031723.4	127.8	0.073827	0.178868	0.412745	0.679793	0.790715	614.741	0.0122629	0.116868	0.104929	0.916432	0.935645	280.076	0.052153	0.199178	0.261841	0.793444	0.875123	DNAJB14
NM_001031725.6	78.6974	-0.579962	0.209394	-2.76972	0.00561043	0.0224423	281.538	-0.388524	0.132084	-2.94148	0.00326647	0.00711281	151.474	-0.197862	0.206961	-0.956035	0.339055	0.516795	DDX59
NM_001031732.4	443.383	0.304725	0.109173	2.79121	0.00525119	0.0212607	1480.93	0.355717	0.0911996	3.90042	9.6026167089221e-05	0.000297614	830.605	-0.0604141	0.132835	-0.454807	0.649248	0.772792	YTHDC1
NM_001031827.3	61.5898	0.615287	0.283369	2.17133	0.0299063	0.0853664	723.362	0.10027	0.421905	0.237659	0.812145	0.851343	227.569	0.482356	0.595837	0.809543	0.418203	0.590173	BOLA2
NM_001032.5	965.31	0.242555	0.112313	2.15964	0.0308008	0.0874262	2434.31	-0.427824	0.108471	-3.94414	8.00853636939871e-05	0.000251915	1636.99	0.6641	0.174449	3.80684	0.000140754	0.00146342	RPS29
NM_001032221.6	100.841	0.361437	0.195418	1.84956	0.0643771	0.151449	910.801	0.242087	0.131646	1.83893	0.0659259	0.101564	313.374	0.110872	0.230452	0.481106	0.630441	0.760294	STXBP1
NM_001032283.3	1779.53	0.153648	0.0719978	2.13406	0.0328378	0.0916351	6748.83	0.215441	0.0701108	3.07286	0.00212018	0.00482624	3508.29	-0.0710776	0.0859719	-0.826754	0.408376	0.580778	TMPO
NM_001032288.3	449.513	0.075595	0.103105	0.733184	0.463446	0.61898	5545.61	-0.0946441	0.0770881	-1.22774	0.219545	0.287954	1718.57	0.160251	0.115249	1.39048	0.164384	0.318701	UBE2V1
NM_001032296.4	378.753	-0.0207343	0.10947	-0.189407	0.849774	0.911405	2872.28	0.240228	0.0710128	3.38289	0.000717282	0.0018267	1057.99	-0.27256	0.108779	-2.50562	0.0122235	0.0487553	STK24
NM_001032363.4	584.326	-0.284128	0.105929	-2.68226	0.00731271	0.027816	1980.57	-0.343027	0.0968607	-3.54145	0.000397934	0.00107293	1100.87	0.0501616	0.145167	0.345545	0.729685	0.832557	MICOS10
NM_001032373.2	45.4027	-0.583573	0.275384	-2.11912	0.0340802	0.0942992	232.533	-0.764503	0.164699	-4.64181	3.45365747469278e-06	1.44332367474534e-05	102.551	0.199271	0.283178	0.703694	0.481624	0.646207	ZNF226
NM_001032382.2	120.945	0.755541	0.173835	4.3463	1.38455656137321e-05	0.000144863	613.558	0.138543	0.116001	1.19433	0.232351	0.30194	271.954	0.60616	0.187704	3.22933	0.00124079	0.00834316	PQBP1
NM_001032386.2	43.5317	-0.0240958	0.273403	-0.0881326	0.929771	0.962074	358.252	-0.510376	0.138534	-3.68412	0.000229493	0.000656908	127.668	0.505324	0.262698	1.92359	0.0544055	0.147412	SUOX
NM_001032396.4	219.488	0.214274	0.135289	1.58382	0.113234	0.230771	1258.28	0.105573	0.088453	1.19355	0.232653	0.302231	525.055	0.0974025	0.141573	0.688003	0.491451	0.653924	PJA1
NM_001032999.3	54.2386	0.038174	0.249046	0.153281	0.878177	0.931987	590.088	0.321304	0.121575	2.64285	0.00822121	0.016078	190.302	-0.29335	0.238307	-1.23097	0.218333	0.387249	CBFA2T2
NM_001033.5	2070.36	-0.105087	0.0739054	-1.42191	0.155054	0.291132	2876.48	0.284706	0.0714539	3.98448	6.76289688260475e-05	0.000216778	3003.38	-0.398319	0.0870394	-4.57631	4.73242411399854e-06	9.38912944217311e-05	RRM1
NM_001033002.4	151.102	0.432976	0.154656	2.79961	0.00511651	0.0208745	340.179	0.0123027	0.145891	0.0843279	0.932796	0.948762	247.371	0.410277	0.193784	2.11719	0.0342439	0.106511	RPAIN
NM_001033025.3	233.126	-0.307113	0.129715	-2.3676	0.0179038	0.0568458	935.6	-0.286506	0.100753	-2.84363	0.00446021	0.00937078	470.714	-0.0311032	0.146106	-0.212882	0.831419	0.89844	EXTL2
NM_001033026.2	100.292	0.249448	0.186396	1.33827	0.180809	0.325455	2893.44	-0.0746201	0.0841217	-0.88705	0.375052	0.453518	742.447	0.337555	0.1686	2.00211	0.045273	0.130154	TMEM259
NM_001033031.2	36.103	0.141863	0.295983	0.479296	0.631728	0.754691	72.6083	-0.723453	0.243719	-2.96839	0.00299363	0.00658676	57.2094	0.852047	0.321466	2.65051	0.00803708	0.0354995	FAIM
NM_001033044.4	543.431	0.127342	0.111807	1.13894	0.254727	0.413706	4270.39	0.143595	0.077034	1.86405	0.0623149	0.0966374	1550.41	-0.0302022	0.132724	-0.227557	0.819991	0.891216	GLUL
NM_001033057.2	264.807	0.356166	0.123543	2.88293	0.00393997	0.0170454	2569.14	0.268777	0.0743376	3.61563	0.00029962	0.000830559	861.303	0.0730674	0.120308	0.607334	0.543629	0.695156	MAGI1
NM_001033088.3	71.027	-0.497463	0.22806	-2.18128	0.0291628	0.0835642	4170.48	-0.307247	0.08117	-3.78523	0.000153568	0.000457284	985.341	-0.181188	0.19025	-0.952364	0.340912	0.518408	NGRN
NM_001033561.2	129.898	-0.12549	0.170755	-0.734914	0.462392	0.618356	1460.54	0.183857	0.0876878	2.09673	0.0360177	0.0595607	465.902	-0.318861	0.161841	-1.97021	0.0488147	0.137248	PHF12
NM_001033564.3	43.2457	-0.144565	0.273996	-0.527619	0.597764	0.728638	428.224	-0.435347	0.121189	-3.5923	0.000327776	0.000900903	142.477	0.258478	0.245206	1.05413	0.291825	0.469772	FAM229B
NM_001033566.3	218.535	-0.252805	0.140693	-1.79685	0.072359	0.165526	677.717	0.539785	0.109443	4.93212	8.13424459593856e-07	3.86617480033696e-06	398.154	-0.796249	0.163631	-4.86613	1.1380228887928e-06	2.92697683490229e-05	RHOT1
NM_001033910.3	41.4321	0.516916	0.273646	1.889	0.0588922	0.141492	352.482	-0.591403	0.140647	-4.20488	2.61226074443762e-05	9.12666720289214e-05	123.971	1.10964	0.262555	4.2263	2.37561192300179e-05	0.000352661	TRAF5
NM_001033930.3	955.659	0.279895	0.0997959	2.80468	0.00503668	0.0206262	10124.3	-0.374428	0.0971665	-3.85346	0.000116458	0.000356481	3292.49	0.648159	0.151018	4.29192	1.77135104989708e-05	0.000275573	UBA52
NM_001034.4	2265.24	-0.0120199	0.0800037	-0.150242	0.880574	0.932673	5927.11	0.0980948	0.0667653	1.46925	0.141765	0.197922	3888.13	-0.119859	0.0941515	-1.27305	0.203001	0.368504	RRM2
NM_001034077.4	1738.43	0.838235	0.198932	4.21367	2.5125086939466e-05	0.000241872	22.4395	-0.678679	0.455551	-1.4898	0.136277	0.191178	2002.71	1.51764	0.320704	4.7322	2.22101997978289e-06	5.08568613600738e-05	H4C15
NM_001034116.2	172.596	0.308794	0.149299	2.06829	0.0386127	0.103405	579.034	0.165818	0.103418	1.60337	0.108854	0.157451	323.846	0.142278	0.153998	0.923898	0.35554	0.530492	EIF2B4
NM_001034852.3	421.367	0.585148	0.113185	5.16982	2.34322817166325e-07	3.79279139570752e-06	2297.6	0.320873	0.0865361	3.70797	0.000208929	0.000602663	982.337	0.253457	0.13558	1.86942	0.061564	0.161014	SMOC1
NM_001034954.3	91.7765	0.368074	0.191102	1.92606	0.0540967	0.132808	442.448	0.353433	0.112062	3.15391	0.00161097	0.0037752	201.41	0.0171446	0.184158	0.0930969	0.925827	0.956805	SORBS1
NM_001034996.3	2691.67	0.286498	0.0702702	4.0771	4.56015605021488e-05	0.000410414	8542.31	-0.262479	0.0704877	-3.72376	0.000196276	0.000569174	4944.62	0.539988	0.0879618	6.1389	8.30971980536085e-10	5.68016265526445e-08	RPL14
NM_001035005.4	205.608	-0.490274	0.145312	-3.37395	0.000740991	0.00436977	1278.22	-0.4952	0.0881665	-5.61665	1.94696842929501e-08	1.22349761026615e-07	513.294	0.0106564	0.150066	0.0710114	0.943389	0.966895	C18orf32
NM_001035006.5	3913.3	0.117882	0.0856678	1.37604	0.16881	0.310069	18329.6	-0.418219	0.077356	-5.40642	6.42967251061503e-08	3.70101436113066e-07	8469.3	0.527998	0.120301	4.38898	1.13881932885142e-05	0.000192435	RPL17
NM_001035235.4	105.18	-0.191929	0.185834	-1.0328	0.301699	0.464529	783.651	-0.560717	0.104387	-5.37151	7.80810173678454e-08	4.43388634338836e-07	290.693	0.366803	0.184976	1.98297	0.0473706	0.134542	SRA1
NM_001035267.2	414.103	0.225959	0.137636	1.64172	0.100648	0.212457	22928.8	-0.615686	0.108903	-5.65353	1.57190171481275e-08	1.00199816571309e-07	5443.62	0.834735	0.192383	4.33892	1.43185761149941e-05	0.000231736	RPL41
NM_001037131.3	75.796	-0.253661	0.225828	-1.12325	0.261331	0.420249	1976.64	0.760802	0.0796783	9.54842	1.31686797163426e-21	3.74906972870336e-20	515.846	-1.02529	0.192864	-5.31611	1.06006806770838e-07	3.92039208198117e-06	AGAP1
NM_001037132.4	2048.98	-0.178192	0.0838741	-2.12452	0.0336268	0.0933734	3824.88	-0.0638248	0.0773112	-0.825557	0.409055	0.4875	3184.03	-0.122096	0.110048	-1.10948	0.267224	0.443258	NRCAM
NM_001037165.2	124.126	0.422883	0.173438	2.43824	0.0147589	0.0490588	2223.1	-0.0575355	0.0904227	-0.636295	0.524584	0.598338	624.52	0.486159	0.170842	2.84567	0.0044318	0.02239	FOXK1
NM_001037171.2	234.396	-0.300029	0.137277	-2.18558	0.0288465	0.0828832	740.941	-0.255556	0.0993934	-2.57116	0.0101358	0.0193509	429.979	-0.0582508	0.150762	-0.386376	0.699218	0.810978	ACOT9
NM_001037172.3	44.3992	-0.325206	0.266092	-1.22216	0.221648	0.375739	580.146	0.0140753	0.111713	0.125995	0.899736	0.922842	176.76	-0.345521	0.233747	-1.47818	0.13936	0.285908	PXYLP1
NM_001037283.2	1063.02	0.111467	0.105219	1.05938	0.289427	0.450744	4770.18	0.171605	0.0662242	2.59127	0.00956217	0.0183973	2255.81	-0.0723362	0.127629	-0.566768	0.570872	0.717255	EIF3B
NM_001037317.2	46.7449	-0.246261	0.272155	-0.904859	0.36554	0.530021	238.372	0.0287246	0.14366	0.199948	0.841521	0.875602	105.376	-0.268421	0.259022	-1.03629	0.300069	0.478204	PLPPR5
NM_001037333.3	560.983	-0.284107	0.0979576	-2.90031	0.00372792	0.0163227	2622.64	0.132837	0.0780775	1.70134	0.0888784	0.131631	1213.31	-0.42534	0.110008	-3.86645	0.000110432	0.00120705	CYFIP2
NM_001037442.4	437.583	-0.354542	0.108791	-3.25893	0.00111834	0.00621685	1740.57	-0.198953	0.0779641	-2.55185	0.0107151	0.0203278	880.156	-0.16995	0.11533	-1.4736	0.14059	0.287453	RUFY3
NM_001037582.3	168.068	0.0523736	0.149825	0.349566	0.726665	0.825558	1398.05	-0.039526	0.0798453	-0.495032	0.620577	0.686751	496.209	0.0950823	0.140895	0.674846	0.499774	0.660931	SCD5
NM_001037637.2	2264.78	0.0576445	0.0739177	0.779847	0.435481	0.593857	6526.91	-0.193118	0.0754479	-2.55962	0.0104787	0.0199287	4017.62	0.242062	0.0988416	2.44899	0.0143258	0.055034	BTF3
NM_001037806.4	76.6358	0.503878	0.204696	2.46159	0.0138322	0.0465098	1000.22	0.314987	0.0960582	3.27913	0.00104128	0.00255232	304.945	0.177785	0.187498	0.948199	0.343028	0.520125	NCKAP5L
NM_001037954.4	102.833	-1.09484	0.193052	-5.67122	1.41782599145047e-08	2.97705991013683e-07	781.509	-0.776449	0.104998	-7.39489	1.41520390082877e-13	1.79607278197049e-12	287.492	-0.30934	0.189929	-1.62871	0.103374	0.232563	DIXDC1
NM_001037984.3	123.582	-0.0858004	0.169435	-0.50639	0.612583	0.740314	1209.99	-0.151176	0.096865	-1.56069	0.118598	0.169509	404.243	0.0668039	0.169206	0.394809	0.692984	0.805742	SLC38A10
NM_001039111.3	47.4035	-0.337466	0.279951	-1.20545	0.228031	0.383294	1121.21	-0.738449	0.103904	-7.10703	1.18562496044192e-12	1.34834838618679e-11	297.328	0.391563	0.236272	1.65726	0.0974672	0.223448	TRIM71
NM_001039141.3	179.747	-0.469773	0.161086	-2.91629	0.00354224	0.015722	2327.89	0.0956708	0.0776755	1.23167	0.218071	0.286378	711.19	-0.550572	0.157201	-3.50233	0.000461205	0.00383898	TRIOBP
NM_001039182.4	60.537	0.458754	0.278679	1.64617	0.0997281	0.211043	110.461	-1.73482	1.15385	-1.5035	0.132709	0.186947	93.471	2.13637	1.23568	1.7289	0.0838262	0.200574	BOLA2B
NM_001039469.3	141.556	0.637022	0.158027	4.03111	5.55142990890612e-05	0.000488167	979.933	0.704876	0.101037	6.97643	3.0276923066218e-12	3.25438304437524e-11	375.169	-0.0813426	0.164392	-0.494809	0.620735	0.753277	MARK2
NM_001039479.2	104.775	-0.0597888	0.186916	-0.319871	0.749066	0.842812	1537.11	0.0351119	0.0870983	0.40313	0.686853	0.746371	453.585	-0.118154	0.16957	-0.696789	0.485935	0.649557	AREL1
NM_001039547.3	41.0682	-0.245447	0.277057	-0.885909	0.375667	0.538867	390.585	-0.463069	0.121098	-3.82391	0.000131352	0.000397308	131.82	0.197653	0.245291	0.805791	0.420363	0.591935	GK5
NM_001039570.3	89.2409	0.0378998	0.193451	0.195914	0.844677	0.908692	3077.78	0.111777	0.0794647	1.40662	0.159539	0.21882	769.68	-0.0690396	0.165323	-0.417604	0.676237	0.793491	KREMEN1
NM_001039580.2	166.025	-0.493966	0.151079	-3.26959	0.00107702	0.00602111	441.71	-0.225515	0.125515	-1.79672	0.07238	0.110059	286.539	-0.278647	0.175067	-1.59166	0.111461	0.245365	MAP9
NM_001039591.3	3567.26	-0.136893	0.0831007	-1.64732	0.0994925	0.21065	5183.16	0.437151	0.0758397	5.76415	8.20703718111624e-09	5.50642534436835e-08	5224.16	-0.582713	0.111356	-5.23287	1.66895910363335e-07	5.69743447847629e-06	USP9X
NM_001039613.3	188.359	-0.334161	0.145787	-2.29212	0.0218989	0.0669882	924.955	-0.371765	0.0960406	-3.87092	0.000108427	0.000333715	416.927	0.027746	0.154291	0.179829	0.857287	0.91525	IAH1
NM_001039672.3	108.803	-0.0851315	0.204363	-0.41657	0.676993	0.788983	773.924	-0.407391	0.104484	-3.89908	9.65607952784193e-05	0.000299161	292.672	0.32707	0.210502	1.55376	0.120241	0.258285	YIF1B
NM_001039697.2	309.929	0.00869042	0.124605	0.0697439	0.944398	0.969223	958.337	0.269388	0.0874485	3.08054	0.00206628	0.00471374	563.922	-0.264564	0.129734	-2.03928	0.0414219	0.12215	SNAPC3
NM_001039705.3	277.715	-0.0997566	0.133488	-0.747309	0.454877	0.611701	1190.75	0.131827	0.0832746	1.58305	0.113411	0.163091	577.335	-0.245919	0.140647	-1.74848	0.0803816	0.194428	TRO
NM_001039707.2	51.3252	0.0727985	0.253899	0.286722	0.774325	0.860378	1103.72	-0.356359	0.0849575	-4.19456	2.73406227185883e-05	9.48536136885728e-05	298.149	0.384328	0.202905	1.89413	0.0582081	0.154453	ENTR1
NM_001039844.3	56.4777	-0.0498149	0.260688	-0.19109	0.848455	0.910922	620.104	-0.00732852	0.147731	-0.0496073	0.960435	0.969757	199.349	-0.0759598	0.28455	-0.266947	0.78951	0.872929	ACBD7
NM_001039886.4	92.385	-1.35113	0.204558	-6.60514	3.97144956236249e-11	1.32376419602383e-09	110.489	-0.266125	0.240511	-1.1065	0.268511	0.342425	130.155	-1.09314	0.283528	-3.85547	0.000115506	0.00124705	ZNF808
NM_001039960.3	285.235	0.0995636	0.11883	0.837867	0.402105	0.563656	1244.32	0.340599	0.0925699	3.67937	0.000233814	0.000668143	597.544	-0.252118	0.131282	-1.92043	0.0548038	0.148348	SLC4A8
NM_001040025.3	44.8747	-0.124524	0.273141	-0.455897	0.648464	0.769062	1059.25	-0.364726	0.094798	-3.8474	0.000119377	0.000363567	281.123	0.266707	0.224904	1.18587	0.235674	0.407595	ARL16
NM_001040058.2	3379.12	-0.619054	0.0803338	-7.70602	1.29798927927839e-14	7.10775557932123e-13	5596.03	-0.623554	0.0804842	-7.74754	9.36901159547517e-15	1.36833034168231e-13	5096.48	-0.0036041	0.112352	-0.0320786	0.974409	0.984756	SPP1
NM_001040092.3	1509.25	-0.0480051	0.0899256	-0.533831	0.593458	0.726151	2442.12	0.303089	0.0944058	3.2105	0.00132506	0.00316865	2264.08	-0.358523	0.133427	-2.68702	0.0072092	0.03271	ENPP2
NM_001040108.2	73.113	-0.503515	0.222354	-2.26448	0.0235448	0.0707752	231.993	-0.547972	0.142569	-3.84357	0.000121259	0.000369032	134.307	0.05577	0.220166	0.253309	0.800029	0.878709	MLH3
NM_001040118.3	41.951	-0.255813	0.281766	-0.907891	0.363936	0.528857	564.294	-0.398515	0.110543	-3.60506	0.000312077	0.000861972	170.503	0.147236	0.243545	0.604556	0.545474	0.696357	ARAP1
NM_001040157.3	121.049	-0.159469	0.178689	-0.892437	0.372159	0.53584	288.756	-0.234869	0.150168	-1.56405	0.117806	0.168521	201.696	0.0596372	0.214982	0.277406	0.781468	0.866791	CEP44
NM_001040167.2	126.576	0.736439	0.175218	4.20299	2.63414728925088e-05	0.000252429	2235.49	0.0128212	0.107282	0.119509	0.904872	0.926644	629.993	0.709381	0.192237	3.69013	0.000224135	0.00216484	LFNG
NM_001040181.2	311.779	0.311988	0.123769	2.52072	0.0117113	0.0406427	2063.56	0.262937	0.097727	2.69053	0.00713389	0.0142021	805.577	0.0409986	0.152377	0.26906	0.787884	0.871904	CLDND1
NM_001040185.3	55.2605	-0.611034	0.242507	-2.51966	0.0117469	0.0407326	161.806	-0.533019	0.205492	-2.59387	0.00949022	0.0182811	98.5796	-0.0858617	0.292535	-0.293509	0.769133	0.858302	ZNF765
NM_001040202.2	84.4812	-0.104933	0.198358	-0.529008	0.5968	0.728335	1482.18	0.184189	0.134943	1.36494	0.172271	0.233791	418.383	-0.298917	0.231663	-1.29031	0.196943	0.360066	PAQR3
NM_001040260.4	424.305	0.0969403	0.10651	0.910151	0.362743	0.527689	2809.07	0.546922	0.0708536	7.71904	1.17207196923029e-14	1.68550349568322e-13	1096.78	-0.461215	0.107915	-4.27386	1.92117231129988e-05	0.000292935	DCLK2
NM_001040272.6	96.3853	0.147502	0.185133	0.796737	0.425604	0.585787	350.899	0.428219	0.154154	2.77787	0.00547169	0.0112546	186.856	-0.289773	0.225293	-1.28621	0.198371	0.362019	ADAMTSL1
NM_001040402.3	205.861	-0.028019	0.148435	-0.188763	0.850279	0.911453	1341.31	-0.0319857	0.0838233	-0.381585	0.702769	0.760529	527.339	-0.0127981	0.151008	-0.084751	0.932459	0.960598	DCUN1D4
NM_001040429.3	120.786	0.801611	0.183335	4.37237	1.22903459598504e-05	0.000130864	1066.5	1.35643	0.286377	4.73653	2.17409192056624e-06	9.53725799823618e-06	370.201	-0.564094	0.271635	-2.07666	0.0378329	0.114668	PCDH17
NM_001040431.3	94.4322	-0.148079	0.196896	-0.752067	0.452011	0.610182	1249.67	-0.460282	0.104583	-4.40111	1.07696668020802e-05	4.09733553684559e-05	379.33	0.287144	0.197298	1.45538	0.145565	0.293449	COA3
NM_001040436.3	195.535	-0.124611	0.14054	-0.886658	0.375263	0.538379	459.496	0.0126392	0.109674	0.115244	0.908252	0.929212	324.334	-0.152565	0.149523	-1.02034	0.307566	0.486566	YARS2
NM_001040440.3	131.303	-0.715112	0.168318	-4.24857	2.15136992531528e-05	0.000214197	354.576	-0.493478	0.127983	-3.85582	0.000115342	0.00035345	227.739	-0.229056	0.183287	-1.24971	0.211406	0.378708	CCDC112
NM_001040441.3	76.4221	-0.613038	0.212725	-2.88183	0.00395371	0.0170808	502.882	-0.0785028	0.116215	-0.675495	0.499362	0.574095	196.842	-0.536924	0.207713	-2.58493	0.00973987	0.0411662	ZBTB8A
NM_001040446.3	134.269	-0.154495	0.171112	-0.902889	0.366585	0.530897	1031.38	-0.287139	0.0882456	-3.25386	0.00113848	0.00277123	377.813	0.101078	0.161588	0.625528	0.531625	0.68674	MTMR12
NM_001040450.3	79.7092	-0.455104	0.208207	-2.18583	0.0288283	0.0828592	1172.66	-0.347546	0.111519	-3.11646	0.00183035	0.00422123	345.71	-0.105201	0.208119	-0.505484	0.613219	0.748563	MINDY2
NM_001040455.2	53.6051	-0.0595142	0.24385	-0.244061	0.807184	0.883758	586.963	0.110118	0.121739	0.904538	0.36571	0.444197	188.805	-0.177417	0.231892	-0.765085	0.444221	0.614952	SIDT2
NM_001040456.3	135.104	0.0829143	0.166555	0.497819	0.618611	0.74417	2092.27	-0.232655	0.0732008	-3.17831	0.00148138	0.00350662	608.715	0.322732	0.14544	2.219	0.0264868	0.0876862	RHBDD2
NM_001040458.3	466.291	-0.344358	0.107254	-3.21067	0.00132424	0.00718157	711.663	-0.135691	0.105264	-1.28906	0.197377	0.26268	690.292	-0.216864	0.137256	-1.58	0.114107	0.248876	ERAP1
NM_001040616.3	48.7227	-0.29446	0.265344	-1.10973	0.267115	0.427111	160.009	-0.187583	0.184776	-1.0152	0.310013	0.386404	90.6754	-0.117001	0.287797	-0.406539	0.684346	0.799269	LINS1
NM_001040694.2	280.249	0.799998	0.142433	5.61665	1.94695453401292e-08	3.98237779086322e-07	1114.93	0.916837	0.12022	7.6263	2.41579337448249e-14	3.37051171635165e-13	563.943	-0.126051	0.197536	-0.638116	0.523398	0.680136	INCENP
NM_001040697.4	133.13	-0.133795	0.171028	-0.7823	0.434038	0.592642	327.409	-0.393506	0.137842	-2.85475	0.00430703	0.00909431	223.937	0.254182	0.198099	1.28311	0.199455	0.363555	UEVLD
NM_001040716.2	57.3648	0.222097	0.246204	0.902083	0.367013	0.531255	436.489	0.311109	0.119569	2.60191	0.0092705	0.0179262	160.565	-0.11619	0.231283	-0.502371	0.615407	0.750305	PC
NM_001040874.1	1968	0.805747	0.182651	4.4114	1.02702395175901e-05	0.000112125	83.0187	0.59231	3.09591	0.19132	0.848275	0.880958	2279.22	0.197454	2.72819	0.0723754	0.942303	0.966284	H2AC19
NM_001042371.3	102.003	0.741694	0.188281	3.93929	8.17218132599166e-05	0.00067631	1690.91	0.0996426	0.0946335	1.05293	0.292372	0.367515	483.791	0.617716	0.182467	3.38537	0.000710835	0.00538523	PGP
NM_001042388.3	768.148	0.336973	0.0869498	3.87549	0.000106409	0.000849761	5434.2	0.51113	0.0690602	7.40122	1.34937228394291e-13	1.72029655624613e-12	2060.94	-0.179894	0.0914204	-1.96776	0.0490954	0.137761	PPP4R1
NM_001042413.2	71.5585	0.422961	0.220648	1.9169	0.0552501	0.13476	841.285	0.889868	0.122506	7.26388	3.76128102984486e-13	4.54753446750396e-12	264.684	-0.46405	0.226991	-2.04436	0.0409185	0.121146	GLIS3
NM_001042424.3	517.102	0.0846288	0.101409	0.834531	0.403982	0.565065	5855.06	0.393067	0.0668396	5.88075	4.08417248587289e-09	2.86811012820424e-08	1863.68	-0.313782	0.102271	-3.06814	0.00215399	0.0127635	NSD2
NM_001042432.2	48.4061	0.445393	0.25624	1.73819	0.0821781	0.183142	494.172	0.110559	0.119551	0.924787	0.355077	0.432904	162.777	0.343865	0.236421	1.45446	0.145818	0.293593	CLN3
NM_001042454.3	185.442	-0.390664	0.153524	-2.54464	0.010939	0.0384208	1780.69	-0.75729	0.0988967	-7.65739	1.89756765931496e-14	2.68223464683646e-13	598.967	0.361257	0.174912	2.06537	0.0388882	0.116775	TGFB1I1
NM_001042462.2	91.4152	0.190025	0.207572	0.915466	0.359947	0.525162	1243.77	-0.355776	0.1106	-3.21678	0.00129637	0.00310974	374.639	0.552527	0.217001	2.5462	0.0108904	0.0447744	TRAPPC5
NM_001042472.3	165.431	-0.448161	0.154359	-2.90337	0.00369169	0.016223	1180.94	-0.0529449	0.0839863	-0.630399	0.528434	0.60169	446.131	-0.411928	0.147428	-2.7941	0.0052045	0.0253032	ABHD12
NM_001042475.3	60.5876	-0.0755214	0.233406	-0.323563	0.746269	0.840337	282.972	0.466305	0.134299	3.47215	0.000516309	0.00135755	130.975	-0.559548	0.225682	-2.47936	0.0131618	0.0517389	CEP85L
NM_001042479.2	39.3007	-0.0531672	0.286065	-0.185857	0.852557	0.91274	277.368	-0.796809	0.14033	-5.6781	1.36202913587982e-08	8.79526400617566e-08	105.235	0.746554	0.263975	2.82812	0.00468216	0.0233471	GEMIN8
NM_001042492.3	814.495	0.0872611	0.087101	1.00184	0.316421	0.48105	2303.81	0.680434	0.106637	6.38082	1.76137076026333e-10	1.5069108016994e-09	1435.63	-0.599987	0.140307	-4.27625	1.90069853031063e-05	0.00029159	NF1
NM_001042517.2	269.355	0.0156207	0.123064	0.126931	0.898995	0.944385	403.519	0.540057	0.136126	3.96733	7.26811462810995e-05	0.000230865	397.094	-0.533447	0.165372	-3.22575	0.00125644	0.00843494	DIAPH3
NM_001042545.2	150.529	0.227751	0.171054	1.33146	0.183038	0.328277	2586.53	0.0369931	0.0821137	0.450511	0.652342	0.715435	733.735	0.186203	0.165557	1.12471	0.260712	0.436869	LTBP4
NM_001042552.3	62.9182	-0.481974	0.237798	-2.02682	0.0426812	0.111296	313.883	-1.1016	0.147109	-7.48832	6.97630687923343e-14	9.21462979173983e-13	140.307	0.600456	0.250031	2.40152	0.0163271	0.060862	TATDN3
NM_001042603.3	492.756	0.0748838	0.106364	0.704035	0.481411	0.632306	1001.34	0.363837	0.0947941	3.83818	0.000123949	0.00037681	783.369	-0.293685	0.128463	-2.28614	0.0222459	0.0767817	KDM5A
NM_001042618.2	216.439	0.041092	0.140175	0.293147	0.76941	0.856898	701.194	0.250386	0.102498	2.44284	0.014572	0.0267419	400.764	-0.212065	0.153663	-1.38006	0.167568	0.323031	PARP2
NM_001042635.2	171.679	0.23093	0.162875	1.41783	0.15624	0.292716	498.815	-0.0599308	0.118477	-0.505845	0.612965	0.680561	305.388	0.273187	0.19009	1.43715	0.150676	0.300355	NGDN
NM_001042646.3	139.055	0.151497	0.178263	0.849855	0.395406	0.557039	2794.86	0.520314	0.0702826	7.40316	1.32981039833037e-13	1.69792609495909e-12	765.822	-0.372156	0.15537	-2.39529	0.0166071	0.0615791	TRAK1
NM_001042681.2	421.106	0.517952	0.108722	4.76398	1.89809828436842e-06	2.53269981520236e-05	4667.87	0.788066	0.0675487	11.6666	1.88745005547555e-31	1.05334712698626e-29	1496.4	-0.27763	0.111046	-2.50014	0.0124146	0.049354	RERE
NM_001042683.3	186.052	0.0727843	0.146383	0.497218	0.619035	0.744484	179.047	0.474783	0.17252	2.75205	0.00592243	0.0120522	252.681	-0.40908	0.192848	-2.12125	0.0339005	0.105831	SHPRH
NM_001042697.2	77.1725	-0.388199	0.207873	-1.86748	0.0618349	0.146888	362.268	-0.43189	0.127948	-3.37552	0.000736772	0.00187124	167.181	0.0402342	0.207655	0.193755	0.846368	0.907499	ZSWIM7
NM_001042724.2	284.7	0.309648	0.119305	2.59544	0.0094471	0.0341042	3560.8	0.124193	0.0716454	1.73344	0.0830166	0.123907	1099.1	0.183286	0.116116	1.57848	0.114456	0.249572	NECTIN2
NM_001042750.2	1227.76	0.136613	0.0850762	1.60577	0.108325	0.223843	2062.64	0.466022	0.0855543	5.4471	5.11988386520388e-08	3.01293724385985e-07	1858.3	-0.337993	0.112462	-3.00539	0.00265245	0.0149501	STAG2
NM_001044305.3	207.318	-0.0826737	0.135276	-0.611147	0.541102	0.684228	707.559	0.130002	0.10299	1.26227	0.206851	0.273519	391.671	-0.220029	0.14769	-1.4898	0.136276	0.281706	SMAP1
NM_001044385.3	181.179	-0.284416	0.145714	-1.95188	0.0509527	0.126975	1188.2	-0.188244	0.103656	-1.81604	0.0693635	0.106051	465.754	-0.100198	0.165137	-0.60676	0.54401	0.695156	TMEM237
NM_001046.3	548.176	-0.221573	0.0972949	-2.27733	0.0227665	0.0689866	776.187	0.492762	0.124984	3.9426	8.06035230662334e-05	0.000253167	798.34	-0.725812	0.153749	-4.72075	2.34977321277619e-06	5.22778040372793e-05	SLC12A2
NM_001047.4	60.8313	-0.740453	0.235796	-3.14023	0.00168815	0.00871247	1880.89	-0.463956	0.08662	-5.35622	8.49813856595126e-08	4.79342795818415e-07	477.497	-0.26891	0.199637	-1.34699	0.177982	0.336566	SRD5A1
NM_001047160.3	176.423	0.165184	0.147415	1.12054	0.262484	0.421705	1092.68	0.465646	0.0946106	4.92171	8.57893134105582e-07	4.06378046155578e-06	439.631	-0.309513	0.153082	-2.02188	0.0431887	0.125807	NET1
NM_001048166.1	261.195	0.028212	0.126408	0.223181	0.823395	0.894764	516.253	-0.0478574	0.120069	-0.398582	0.690201	0.749302	412.048	0.069907	0.155907	0.44839	0.653872	0.77676	STIL
NM_001048183.3	198.161	0.312251	0.139215	2.24294	0.0249004	0.0735499	1769.17	0.249736	0.0877995	2.84439	0.00444962	0.00935319	611.318	0.0515269	0.145809	0.353386	0.723799	0.829009	PHACTR4
NM_001048201.3	786.155	0.590667	0.106297	5.55677	2.74816803776691e-08	5.41656945783124e-07	4927.05	0.179128	0.0723653	2.47533	0.0133114	0.0247354	1971.64	0.401917	0.129707	3.09865	0.00194403	0.0118176	UHRF1
NM_001048205.2	221.461	0.197126	0.1459	1.3511	0.176663	0.32006	1072.36	0.00466625	0.0913153	0.0511004	0.959246	0.968864	487.022	0.176788	0.160393	1.10222	0.270366	0.446672	REC8
NM_001048241.3	488.419	0.0381369	0.104867	0.363668	0.716106	0.819504	1705.27	-0.420552	0.105373	-3.99108	6.5771898897217e-05	0.000211469	930.878	0.4523	0.149658	3.02223	0.00250922	0.0144126	UBL5
NM_001048249.4	65.4306	0.0336236	0.229409	0.146566	0.883474	0.935052	1337.8	-0.322859	0.0851298	-3.79255	0.000149108	0.000446213	365.116	0.372926	0.191373	1.94869	0.0513328	0.14145	SMIM15
NM_001064.4	1657.55	0.399946	0.0874875	4.57147	4.84314754381368e-06	5.81798621609413e-05	8443.64	0.171384	0.0705482	2.42932	0.0151271	0.0276281	3735.56	0.220677	0.111539	1.97849	0.047874	0.135461	TKT
NM_001065.4	164.679	-0.303652	0.151174	-2.00863	0.0445766	0.114818	2319.73	-0.476738	0.08618	-5.53189	3.16792583713333e-08	1.94436351271104e-07	691.897	0.171408	0.150441	1.13936	0.254551	0.429447	TNFRSF1A
NM_001067.4	4334.25	0.00660427	0.0908228	0.072716	0.942032	0.968091	5248.65	0.757684	0.0909033	8.33505	7.74622977097079e-17	1.42527245152775e-15	6121.19	-0.760222	0.141373	-5.37742	7.55592307492947e-08	2.93601582340117e-06	TOP2A
NM_001069.3	4597.49	-0.0389597	0.0877673	-0.443898	0.657117	0.774813	13250.4	-0.429279	0.0753585	-5.6965	1.22292893249125e-08	7.96415928446968e-08	8155.67	0.381671	0.122743	3.10952	0.00187391	0.0114831	TUBB2A
NM_001070.5	254.518	0.053815	0.127969	0.420531	0.674098	0.786879	1537.08	-0.080571	0.0849521	-0.948428	0.342912	0.420017	625.653	0.128562	0.134286	0.957381	0.338375	0.516039	TUBG1
NM_001071.4	1728.64	-0.0089423	0.0759291	-0.117772	0.906249	0.949155	6371.48	-0.107702	0.0664268	-1.62136	0.104941	0.152341	3367.52	0.0915095	0.0841085	1.08799	0.276598	0.453174	TYMS
NM_001071775.3	108.149	0.165215	0.182123	0.907165	0.36432	0.529161	1260.72	-0.000339715	0.103806	-0.0032726	0.997389	0.998099	397.553	0.165651	0.186955	0.886047	0.375592	0.549921	MZT1
NM_001076678.3	57.585	-0.123261	0.249845	-0.493349	0.621766	0.746658	139.085	-0.0851793	0.182434	-0.466904	0.640569	0.70563	96.3068	-0.0304633	0.267705	-0.113794	0.909401	0.946675	ZNF493
NM_001076786.3	582.11	-0.384141	0.0983189	-3.90709	9.34125185123996e-05	0.000761109	1929.59	0.177599	0.0898954	1.97561	0.0481986	0.077036	1087.23	-0.570085	0.122243	-4.66356	3.10791753552791e-06	6.54487628899432e-05	QSER1
NM_001077195.2	360.742	-0.810138	0.245461	-3.30047	0.000965223	0.00547059	2050.27	-0.892313	0.122105	-7.30773	2.71698344767724e-13	3.36211740287461e-12	858.642	0.078696	0.300528	0.261859	0.79343	0.875123	ZNF436
NM_001077198.3	103.377	-0.0516302	0.189485	-0.272477	0.785255	0.869037	1120.72	-0.162222	0.0898886	-1.8047	0.0711219	0.10838	361.695	0.10465	0.173486	0.603218	0.546363	0.696754	ATG9A
NM_001077199.3	180.499	0.0811449	0.152146	0.533334	0.593802	0.726467	1792.94	0.248051	0.0819879	3.02546	0.00248254	0.00555949	596.144	-0.186072	0.150106	-1.2396	0.215123	0.382926	SREK1
NM_001077207.4	1403.17	0.00143163	0.0775233	0.0184671	0.985266	0.993038	2586.48	0.271535	0.0761158	3.5674	0.000360547	0.000983278	2173.42	-0.278984	0.0933672	-2.98803	0.00280782	0.0156377	SEC31A
NM_001077350.3	77.9286	0.152363	0.206339	0.738412	0.460264	0.616488	835.813	-0.0878122	0.112347	-0.781619	0.434439	0.51325	270.755	0.220694	0.206184	1.07037	0.284451	0.461959	NPRL3
NM_001077351.2	208.858	0.255502	0.148211	1.72391	0.0847237	0.187281	1199.37	0.00541915	0.0908807	0.0596292	0.952451	0.963658	500.023	0.226298	0.159276	1.42079	0.155379	0.307224	RBM23
NM_001077365.2	81.4156	0.144621	0.208712	0.692918	0.488361	0.638284	533.21	-0.17437	0.116577	-1.49575	0.134718	0.189275	209.131	0.297171	0.209603	1.41778	0.156256	0.308126	POMT1
NM_001077415.3	55.1405	-0.242994	0.255114	-0.952494	0.340847	0.505071	531.987	-0.28283	0.111895	-2.52762	0.0114837	0.0216495	178.688	0.0392488	0.232004	0.169173	0.865661	0.92113	CRELD1
NM_001077446.4	122.093	0.333744	0.182923	1.8245	0.0680762	0.158323	1655.93	-0.0369434	0.0782949	-0.471849	0.637034	0.702908	499.277	0.363956	0.168284	2.16274	0.0305609	0.0973884	TSEN34
NM_001077498.3	37.3005	0.022269	0.29095	0.0765391	0.93899	0.966143	763.34	0.0468843	0.100998	0.464211	0.642497	0.707156	208.322	0.000644284	0.237278	0.00271532	0.997833	0.998544	FAM222B
NM_001077525.3	92.1203	-0.0674649	0.192123	-0.351155	0.725472	0.825294	673.969	-0.265967	0.108145	-2.45935	0.013919	0.0257257	251.92	0.18018	0.189601	0.950315	0.341952	0.519334	MTMR14
NM_001077619.2	106.197	-0.0167547	0.192584	-0.0869998	0.930672	0.962398	1239.7	0.0360594	0.0891171	0.40463	0.685749	0.745461	390.743	-0.0564996	0.177988	-0.317434	0.750914	0.846711	UBXN2B
NM_001077628.3	176.736	-0.23016	0.159701	-1.4412	0.149529	0.284068	2839.82	-0.399815	0.0749318	-5.33572	9.51675948282701e-08	5.30408281493275e-07	818.498	0.182001	0.15315	1.18839	0.234681	0.406632	APH1A
NM_001077663.3	58.295	0.0487315	0.237608	0.205092	0.8375	0.904191	470.558	-0.889427	0.121296	-7.33269	2.2557294108422e-13	2.80369199781228e-12	168.931	0.949711	0.226276	4.19714	2.70308686723258e-05	0.000390816	URGCP
NM_001077700.3	161.617	-0.0521421	0.154402	-0.337704	0.735586	0.832361	613.486	-0.280625	0.130703	-2.14704	0.0317899	0.0533972	318.663	0.217505	0.193976	1.1213	0.26216	0.438424	MIER1
NM_001078.4	50.6346	-0.485859	0.267975	-1.81308	0.0698198	0.161268	60.4246	-0.192811	0.299762	-0.643212	0.520087	0.594166	71.3146	-0.30079	0.357864	-0.840517	0.400619	0.574102	VCAM1
NM_001078170.3	504.019	0.806663	0.37216	2.16752	0.0301953	0.085997	281.079	-0.320627	0.180295	-1.77835	0.0753468	0.114014	640.206	1.11674	0.443773	2.51647	0.0118537	0.047618	RGPD2
NM_001078171.2	199.491	0.205803	0.143934	1.42984	0.152762	0.288069	4726.21	-0.427714	0.0797317	-5.36442	8.1211245134557e-08	4.59615287272607e-07	1253.47	0.609821	0.144486	4.22063	2.43622670591195e-05	0.00035913	RTL8C
NM_001078172.2	111.678	-0.0398667	0.188865	-0.211086	0.83282	0.900869	1520.11	-0.470355	0.0918025	-5.12356	2.99827912868638e-07	1.54346354413195e-06	457.795	0.404567	0.184698	2.19042	0.0284938	0.0926749	RTL8A
NM_001078173.2	94.9796	-0.0984811	0.204228	-0.482211	0.629656	0.753496	597.319	-0.15264	0.114004	-1.3389	0.180603	0.243666	238.607	0.0208031	0.209484	0.0993063	0.920895	0.953886	RTL8B
NM_001078645.3	688.906	-0.691517	0.106851	-6.4718	9.68449784205352e-11	2.9806339526291e-09	1470.73	-0.451379	0.0844748	-5.34336	9.12399666787635e-08	5.09191522650291e-07	1110.58	-0.24883	0.130497	-1.90679	0.0565484	0.151514	CDC16
NM_001079514.3	103.044	0.455288	0.180148	2.5273	0.0114944	0.0400216	1651.46	0.729343	0.0873644	8.34829	6.92584455594397e-17	1.28555268883127e-15	476.56	-0.295598	0.165129	-1.7901	0.0734374	0.182143	UBN1
NM_001079521.2	1225.75	-0.511713	0.0832379	-6.1476	7.86654816531338e-10	2.03492640116833e-08	2834.93	0.954969	0.0898126	10.6329	2.09470132005156e-26	8.40573715432119e-25	2023.95	-1.47561	0.118952	-12.4051	2.45148699423427e-35	1.03354691676917e-31	KTN1
NM_001079524.2	3822.17	-0.261886	0.0782981	-3.34473	0.000823624	0.00478678	10870.7	-0.16343	0.0767631	-2.12902	0.0332522	0.0555434	6749.25	-0.106699	0.109168	-0.977389	0.328377	0.5061	PAICS
NM_001079537.2	49.5659	-0.203698	0.292114	-0.697325	0.4856	0.636227	131.58	-0.0573328	0.210657	-0.272161	0.785498	0.829082	85.4737	-0.131643	0.341155	-0.385875	0.699589	0.811296	TRAPPC6B
NM_001079559.3	878.461	0.153201	0.0882499	1.73599	0.0825657	0.183625	4749.65	-0.110313	0.0872972	-1.26364	0.206358	0.272952	2039.02	0.254764	0.121841	2.09096	0.036532	0.111973	HNRNPUL2
NM_001079673.2	575.921	-0.0636222	0.106187	-0.599155	0.549069	0.689419	2011.52	0.314396	0.0978897	3.21174	0.00131936	0.0031559	1098.04	-0.387189	0.145775	-2.65607	0.00790568	0.0351215	FNDC3A
NM_001079675.5	74.2109	-0.908886	0.42366	-2.14532	0.0319272	0.0897287	1438.77	-0.945619	0.382556	-2.47184	0.0134418	0.0249612	396.982	0.029292	0.561614	0.0521568	0.958404	0.975526	ETV4
NM_001079802.2	72.9517	-0.387904	0.214572	-1.8078	0.0706377	0.162644	717.751	-0.510692	0.108209	-4.71948	2.36447379531971e-06	1.02761323739862e-05	239.333	0.1199	0.202091	0.593297	0.552982	0.701904	FKTN
NM_001079855.2	215.705	0.159033	0.149371	1.06468	0.287019	0.448229	1913.4	-0.180547	0.0766649	-2.35502	0.0185218	0.0330265	662.513	0.34478	0.148027	2.32917	0.0198503	0.0702973	GYG2
NM_001079862.4	528.125	0.148294	0.105592	1.4044	0.160199	0.298291	2587.5	-0.163144	0.101664	-1.60474	0.108552	0.157122	1167.71	0.303198	0.149832	2.02359	0.0430125	0.125597	DBI
NM_001079866.2	68.5434	-0.261923	0.223227	-1.17335	0.240655	0.397619	445.448	-0.469152	0.121393	-3.86472	0.000111216	0.000341924	175.288	0.201302	0.216874	0.928197	0.353306	0.528934	BCS1L
NM_001079872.2	719.901	-0.248193	0.0998525	-2.4856	0.0129334	0.0439787	1408.46	0.0440059	0.0988158	0.445332	0.65608	0.718584	1132.8	-0.300891	0.138721	-2.16904	0.0300795	0.0962876	CUL4B
NM_001079910.2	44.888	-0.510676	0.265981	-1.91998	0.054861	0.134177	88.075	0.192298	0.251982	0.763143	0.445378	0.523839	70.6761	-0.710167	0.3212	-2.21098	0.027037	0.0891925	LRRIQ1
NM_001080.3	56.1146	-0.655435	0.259915	-2.52172	0.0116781	0.0405607	523.405	-0.829512	0.115508	-7.1814	6.89994709024116e-13	8.07581307353642e-12	177.88	0.170932	0.235102	0.727055	0.467192	0.63487	ALDH5A1
NM_001080392.2	47.9142	0.502376	0.264307	1.90073	0.0573379	0.138786	1225.33	0.932284	0.0884313	10.5425	5.50349281022391e-26	2.12742816108976e-24	320.804	-0.429461	0.21275	-2.01861	0.0435276	0.12656	DENND11
NM_001080394.4	83.3528	-0.58729	0.204715	-2.86883	0.00411998	0.0176543	736.037	-0.250299	0.0972223	-2.5745	0.0100386	0.0191913	255.289	-0.339465	0.186612	-1.8191	0.0688968	0.174142	SPIDR
NM_001080414.4	68.4692	-0.0586503	0.225271	-0.260354	0.794591	0.875462	480.994	0.529742	0.122129	4.33757	1.44069395729046e-05	5.32955574103893e-05	183.008	-0.595936	0.222935	-2.67314	0.00751456	0.0337755	CCDC88C
NM_001080415.2	1081.98	-0.360094	0.0845728	-4.2578	2.06447406216042e-05	0.000206032	2947.54	-0.0592656	0.0731356	-0.810352	0.417738	0.496373	1882.56	-0.311476	0.0973894	-3.19826	0.00138262	0.00905143	U2SURP
NM_001080417.3	89.3506	-0.311828	0.200037	-1.55886	0.119031	0.239338	1450.09	-0.248661	0.0823917	-3.01804	0.00254417	0.00567993	417.003	-0.0873065	0.174946	-0.499047	0.617746	0.751944	ZNF629
NM_001080421.3	64.9918	-0.524218	0.25956	-2.01965	0.0434202	0.112665	820.655	-0.516136	0.111062	-4.64726	3.36372827678297e-06	1.41095760022151e-05	252.466	0.00387584	0.253281	0.0153025	0.987791	0.992026	UNC13A
NM_001080425.4	173.204	-0.283739	0.149795	-1.89418	0.0582005	0.14035	1740.26	-0.517344	0.0906617	-5.70632	1.15447670835185e-08	7.54753702194028e-08	576.182	0.229321	0.15694	1.46121	0.143959	0.291583	BEX4
NM_001080430.4	323.864	0.589056	0.128637	4.57923	4.66698322141095e-06	5.65469389456301e-05	1920.57	0.571228	0.0960059	5.94993	2.68261876511601e-09	1.94046595138477e-08	788.618	0.0124907	0.158261	0.0789245	0.937093	0.962784	TOX3
NM_001080432.3	425.696	0.0222685	0.107124	0.207876	0.835326	0.902885	1440.49	-0.0711889	0.0843013	-0.844458	0.398413	0.477043	801.439	0.0826181	0.11881	0.69538	0.486817	0.649809	FTO
NM_001080449.3	374.034	0.0707372	0.111548	0.634142	0.525988	0.671859	518.16	0.395665	0.121228	3.26381	0.00109924	0.00268191	542.2	-0.335175	0.146878	-2.282	0.0224892	0.077368	DNA2
NM_001080453.3	247.874	0.019989	0.131007	0.15258	0.87873	0.932	2510.91	0.154624	0.0750573	2.06008	0.0393914	0.0643815	829.238	-0.138578	0.129525	-1.0699	0.284665	0.462162	INTS1
NM_001080457.2	166.737	0.315509	0.167423	1.8845	0.0594968	0.142458	3608.36	0.592861	0.095467	6.21012	5.29444558741887e-10	4.23706485899134e-09	974.221	-0.284156	0.184348	-1.54141	0.123218	0.26345	LRRC4B
NM_001080466.2	82.3591	-0.0660393	0.217226	-0.304012	0.761118	0.851487	1258.73	-0.847898	0.154057	-5.50381	3.71665755915391e-08	2.25325706841655e-07	367.39	0.773643	0.273873	2.82483	0.00473063	0.0235263	BTBD17
NM_001080475.3	39.5032	0.00577935	0.29334	0.0197019	0.984281	0.992401	289.68	0.51949	0.144807	3.58746	0.00033391	0.000916268	108.193	-0.525487	0.274129	-1.91693	0.0552462	0.149149	PLEKHM3
NM_001080477.4	3532.4	-0.0306252	0.0730468	-0.419255	0.67503	0.787457	9744.46	0.417322	0.07297	5.71908	1.0710060353481e-08	7.02363257578091e-08	6172.6	-0.456985	0.0957495	-4.77271	1.81759713118131e-06	4.32937260172905e-05	TENM3
NM_001080480.3	54.2717	0.0513888	0.239747	0.214346	0.830277	0.899618	409.611	-0.424289	0.127358	-3.33145	0.000863937	0.00216421	151.126	0.475909	0.229148	2.07686	0.0378142	0.114653	MBOAT1
NM_001080495.3	222.365	0.223487	0.131862	1.69486	0.0901024	0.196086	3318.28	0.237241	0.0916987	2.58718	0.00967661	0.0185878	975.016	-0.0197473	0.14898	-0.13255	0.894549	0.937464	TNRC18
NM_001080496.3	56.3465	0.378622	0.242834	1.55918	0.118953	0.23926	1383.39	0.301724	0.0792714	3.80621	0.000141111	0.000424391	364.687	0.0578542	0.192783	0.3001	0.764101	0.855403	RGP1
NM_001080497.3	85.6866	-0.141898	0.209758	-0.676483	0.498734	0.647747	1768.31	0.386541	0.0756358	5.11056	3.21210006976383e-07	1.64449375989671e-06	481.864	-0.568784	0.172333	-3.3005	0.000965137	0.00683294	MEGF9
NM_001080517.3	235.063	0.420883	0.148129	2.84132	0.00449277	0.0188683	3315.99	0.688618	0.0784569	8.77703	1.67854761297517e-18	3.70291118705281e-17	989.146	-0.265604	0.155098	-1.71249	0.0868058	0.205603	SETD5
NM_001080533.3	135.654	0.265931	0.163167	1.6298	0.103143	0.215959	2514.07	-0.329597	0.0853406	-3.86213	0.000112401	0.000345443	700.669	0.600615	0.155761	3.856	0.000115256	0.00124595	UNC119B
NM_001080543.2	45.1853	0.598595	0.2796	2.1409	0.0322825	0.0905047	817.434	-0.207737	0.0990837	-2.09658	0.0360306	0.0595702	229.049	0.79291	0.230512	3.43977	0.000582211	0.00458375	CACTIN
NM_001080779.2	162.788	0.334704	0.146838	2.27941	0.0226427	0.0686609	1270.59	0.44314	0.100818	4.39544	1.10546688014303e-05	4.19629252205646e-05	462.566	-0.118735	0.159994	-0.742126	0.458011	0.627347	MYO1C
NM_001080792.4	66.2921	0.207867	0.223864	0.928543	0.353126	0.517808	164.55	0.307304	0.199192	1.54275	0.12289	0.17508	111.831	-0.110843	0.273578	-0.405161	0.685359	0.799615	CCDC32
NM_001080826.3	272.458	0.820339	0.138744	5.9126	3.36753160517553e-09	8.02533894525218e-08	2586.97	0.44167	0.0854867	5.16654	2.38470233743508e-07	1.25286076044672e-06	874.004	0.379889	0.156052	2.43437	0.0149177	0.0568911	PRAG1
NM_001081550.2	715.648	0.196533	0.0938528	2.09406	0.0362549	0.0986535	810.401	0.722977	0.105834	6.83121	8.42016662937874e-12	8.46739190761034e-11	998.329	-0.53523	0.129586	-4.1303	3.62293376084651e-05	0.000502444	THOC2
NM_001082486.2	70.1133	0.339288	0.219716	1.54421	0.122538	0.244467	537.262	-0.0719623	0.109277	-0.658529	0.510198	0.584401	197.011	0.42722	0.203337	2.10105	0.0356369	0.109668	ACD
NM_001082538.3	123.602	-0.479851	0.174462	-2.75046	0.00595115	0.0235268	353.882	-0.0426438	0.15667	-0.272189	0.785477	0.829082	218.742	-0.446202	0.224413	-1.98831	0.0467775	0.133253	TCTN1
NM_001082968.2	122.056	0.425829	0.1741	2.44589	0.0144495	0.048163	1435	0.839722	0.0866004	9.69652	3.119508213414e-22	9.45614953756827e-21	451.469	-0.430798	0.163045	-2.6422	0.00823696	0.0361786	TOM1L2
NM_001083538.3	1809.59	0.0769645	0.291846	0.263716	0.791999	0.873633	9.09265	1.70029	0.732046	2.32265	0.0201978	0.0356902	2081.95	-1.6254	0.526848	-3.08515	0.00203452	0.0122274	POTEE
NM_001083601.3	52.8959	0.0521326	0.250454	0.208153	0.83511	0.902869	1241.47	-0.0766089	0.093351	-0.820655	0.411843	0.490443	329.875	0.152264	0.211001	0.72163	0.470522	0.637647	NAA60
NM_001083603.3	129.383	-0.349787	0.175919	-1.98834	0.0467739	0.118988	887.948	-2.74646	0.288967	-9.50442	2.01160052204576e-21	5.65058586642654e-20	340.889	2.38907	0.268019	8.91378	4.9322966008826e-19	2.44641911403777e-16	PTCH1
NM_001083614.2	91.6453	0.224218	0.19107	1.17349	0.2406	0.397605	812.446	-0.337903	0.108939	-3.10176	0.00192375	0.00441829	281.337	0.557448	0.190736	2.92261	0.00347113	0.0183964	EARS2
NM_001083893.2	428.824	0.337082	0.122231	2.75775	0.00582001	0.0230919	987.144	0.752148	0.09947	7.56155	3.98285654232025e-14	5.43979450277679e-13	706.86	-0.425669	0.154581	-2.7537	0.00589264	0.0278513	STRN3
NM_001083926.2	46.7419	0.112135	0.268153	0.418174	0.67582	0.788269	404.617	-0.0440462	0.121446	-0.362682	0.716843	0.771986	141.407	0.123987	0.243275	0.509657	0.610292	0.74666	ASRGL1
NM_001083961.2	92.2081	0.337257	0.201134	1.67677	0.0935865	0.201382	673.903	0.309775	0.115201	2.68899	0.00716686	0.0142542	252.111	0.0255787	0.210713	0.121391	0.903381	0.943203	WDR62
NM_001083962.2	190.424	0.495043	0.150365	3.29228	0.000993792	0.00560954	1207.76	0.829993	0.102733	8.07914	6.52261027322298e-16	1.10818622525101e-14	480.749	-0.338769	0.17152	-1.9751	0.0482572	0.136317	TCF4
NM_001083965.2	93.4369	-0.256968	0.192875	-1.3323	0.182761	0.328155	328.249	-0.236298	0.129172	-1.82933	0.0673508	0.103597	178.521	-0.0309509	0.19736	-0.156825	0.875383	0.926476	TDRKH
NM_001084.5	183.847	-0.132507	0.148856	-0.890166	0.373377	0.53686	1222.95	-0.116136	0.0948433	-1.2245	0.220762	0.28919	476.313	-0.0177133	0.157992	-0.112115	0.910732	0.947359	PLOD3
NM_001084392.3	70.3393	0.45246	0.222185	2.03641	0.0417094	0.109473	1336.79	-0.412973	0.0949614	-4.34885	1.36850512304332e-05	5.09156409354795e-05	370.553	0.844738	0.199918	4.22542	2.38497262808326e-05	0.000353429	DDT
NM_001084393.2	41.0988	0.524705	0.28791	1.82246	0.0683851	0.158781	59.4292	-1.62488	0.290456	-5.59422	2.21622108042117e-08	1.3762781904723e-07	60.123	2.13634	0.353239	6.04786	1.46781234132753e-09	9.59425865277036e-08	DDTL
NM_001085365.2	70.8813	0.753951	0.2399	3.14278	0.00167353	0.00865029	1066.5	-0.464938	0.104951	-4.43005	9.42092102989823e-06	3.61356857164098e-05	312.577	1.22907	0.228738	5.37328	7.73176912319546e-08	2.99056317645799e-06	MZT2A
NM_001085377.2	228.749	0.459832	0.150374	3.05792	0.00222879	0.0108707	2143.34	0.484785	0.0894494	5.41966	5.97140111496435e-08	3.46086638210485e-07	727.602	-0.0264628	0.169611	-0.156021	0.876017	0.926797	MCC
NM_001085400.2	52.6207	-0.776575	0.267677	-2.90116	0.00371781	0.016287	251.73	-0.997457	0.143651	-6.94362	3.82167836104603e-12	4.01562139009164e-11	115.008	0.239055	0.252107	0.948227	0.343014	0.520125	RELL1
NM_001085411.3	123.139	-0.426327	0.175871	-2.42409	0.0153468	0.0503972	737.882	-0.875906	0.110406	-7.93347	2.1310242028871e-15	3.33794441593488e-14	301.357	0.430037	0.186156	2.31009	0.0208833	0.0731522	NADK2
NM_001085457.2	153.914	-0.316193	0.16463	-1.92063	0.0547785	0.134053	110.174	-0.551065	0.329553	-1.67216	0.0944932	0.139139	200.803	0.241748	0.552611	0.437466	0.661774	0.781961	CBWD6
NM_001085458.2	1277.74	0.0548211	0.0868704	0.631068	0.527996	0.673513	4762.85	-0.107407	0.0674918	-1.59141	0.111518	0.160643	2500.84	0.149869	0.099968	1.49917	0.13383	0.27863	CTNND1
NM_001085487.3	65.4114	-0.219618	0.240654	-0.912588	0.361459	0.526639	979.342	0.292921	0.114275	2.56329	0.0103685	0.0197369	287.49	-0.495993	0.231517	-2.14236	0.0321644	0.101526	MYSM1
NM_001087.5	307.508	0.057471	0.120492	0.476971	0.633383	0.756239	1615.98	-0.358773	0.0959159	-3.74049	0.00018366	0.000535721	703.633	0.404965	0.145342	2.78629	0.00533148	0.0258214	AAMP
NM_001089.3	89.2898	-0.155149	0.197805	-0.784353	0.432833	0.591969	1086.48	0.122317	0.0902183	1.35578	0.175168	0.23719	338.123	-0.265809	0.177129	-1.50065	0.133447	0.278107	ABCA3
NM_001093725.2	123.108	1.22005	0.196455	6.2103	5.28846466062514e-10	1.4248441687876e-08	4464.12	1.11513	0.0768731	14.5061	1.10895512810923e-47	1.22962695586532e-45	1109.78	0.119756	0.176027	0.680328	0.496297	0.657881	MEX3A
NM_001093771.3	1356.18	-0.187663	0.0796635	-2.35569	0.0184882	0.0583104	5077.78	-0.0721728	0.0725566	-0.99471	0.319877	0.396471	2659.38	-0.12458	0.0965255	-1.29065	0.196827	0.360021	TXNRD1
NM_001096.3	2158.58	0.239884	0.0854858	2.80613	0.00501404	0.0205758	6553.48	0.614937	0.0722262	8.51405	1.67967448479958e-17	3.33835303853917e-16	3902.33	-0.384196	0.112542	-3.4138	0.000640632	0.00494218	ACLY
NM_001097612.2	172.226	-0.159719	0.146879	-1.08742	0.276853	0.437456	412.085	0.19311	0.14624	1.3205	0.186669	0.250248	287.23	-0.361058	0.194994	-1.85163	0.0640785	0.165485	GPR89A
NM_001098.3	568.554	-0.193712	0.101797	-1.90292	0.0570505	0.138209	2075.57	0.0164778	0.0857271	0.192212	0.847576	0.88038	1103.42	-0.219256	0.125038	-1.75351	0.0795138	0.192772	ACO2
NM_001098204.2	1004.82	0.0959887	0.0946893	1.01372	0.310715	0.475547	3749.66	-0.170889	0.0779319	-2.1928	0.0283216	0.0481862	1967.55	0.256383	0.11938	2.14763	0.0317434	0.100438	HNRNPF
NM_001098272.3	14052.9	0.0382005	0.0657992	0.580562	0.561536	0.700573	26599.3	0.413049	0.077747	5.31273	1.07994220433226e-07	5.98728483941314e-07	21918.6	-0.383313	0.0988256	-3.87868	0.000105024	0.00116368	HMGCS1
NM_001098402.2	205.228	-0.156589	0.14097	-1.1108	0.266656	0.426726	729.732	0.0733976	0.128318	0.571998	0.567323	0.638978	394.051	-0.238206	0.18721	-1.2724	0.20323	0.3687	ZBTB21
NM_001098484.3	62.3733	-0.26318	0.244977	-1.0743	0.282686	0.444093	190.276	0.0625245	0.182679	0.342263	0.732153	0.785068	112.928	-0.319588	0.282721	-1.1304	0.258308	0.433788	SLC4A4
NM_001098507.2	906.18	0.459386	0.0983833	4.66935	3.02155333793265e-06	3.83169312763699e-05	4460.46	0.378541	0.0851575	4.44519	8.78148828810054e-06	3.39301246234861e-05	2008.56	0.0725445	0.132693	0.54671	0.584578	0.727382	ZNF207
NM_001098511.3	838.994	-0.101382	0.0884978	-1.14559	0.251964	0.410337	2162.76	0.23389	0.0814103	2.87297	0.00406628	0.0086292	1433.11	-0.343368	0.106695	-3.21821	0.00128993	0.00859819	KIF2A
NM_001098536.2	737.414	0.0225831	0.0911179	0.247845	0.804254	0.881684	2322.84	-0.127964	0.0807392	-1.5849	0.112989	0.162568	1350.88	0.141924	0.108577	1.30713	0.19117	0.353531	USP5
NM_001098616.3	211.846	-0.109298	0.139609	-0.782888	0.433693	0.592472	2985.64	-0.0910454	0.0677003	-1.34483	0.17868	0.241498	890.565	-0.0412613	0.125103	-0.329818	0.741537	0.839732	C1orf43
NM_001098638.2	92.9832	-0.115016	0.199143	-0.577553	0.563566	0.702417	813.97	0.96676	0.108406	8.91799	4.74832539367788e-19	1.10231785378853e-17	283.405	-1.08618	0.197282	-5.50575	3.6760533566683e-08	1.63500961694367e-06	RNF169
NM_001098811.2	82.0442	0.38057	0.202606	1.87837	0.06033	0.144003	313.664	0.245108	0.146322	1.67513	0.0939082	0.138375	162.274	0.12249	0.223068	0.549115	0.582926	0.725969	SEPTIN8
NM_001098816.3	146.648	0.00424261	0.166837	0.0254296	0.979712	0.989688	695.522	0.76363	0.157411	4.85119	1.22720335503047e-06	5.65735375976026e-06	319.422	-0.763527	0.244088	-3.12808	0.00175954	0.0109172	TENM4
NM_001099269.3	64.3439	-0.928215	0.247232	-3.75442	0.000173742	0.0012909	292.999	-1.27787	0.164929	-7.74801	9.33405372701413e-15	1.36559150620743e-13	137.392	0.34586	0.281	1.23082	0.218391	0.387271	ZNF506
NM_001099271.2	77.4523	-0.869663	0.220406	-3.94574	7.95549528051161e-05	0.000660972	141.355	-0.900914	0.198099	-4.54779	5.42128907791033e-06	2.19008643622005e-05	119.651	0.0333073	0.262381	0.126942	0.898986	0.940711	POC5
NM_001099272.2	130.545	-0.370493	0.177298	-2.08966	0.0366482	0.0993425	479.605	0.277047	0.112341	2.46613	0.0136581	0.0253239	254.036	-0.667326	0.185095	-3.60532	0.000311772	0.00283287	BTBD9
NM_001099274.3	76.5676	-0.0147822	0.21798	-0.0678145	0.945933	0.969855	596.913	-0.109516	0.106282	-1.03043	0.302806	0.37871	217.351	0.100414	0.202591	0.495649	0.620142	0.75303	TINF2
NM_001099286.3	68.8985	-0.914801	0.231503	-3.95157	7.76416925264329e-05	0.000646989	145.316	-0.541149	0.185929	-2.91052	0.00360824	0.00778459	110.683	-0.380694	0.259843	-1.46509	0.142896	0.2904	MTFR2
NM_001099334.3	55.0614	-0.916199	0.255487	-3.58609	0.000335676	0.00225362	230.236	-0.693241	0.153124	-4.52732	5.97371178238226e-06	2.39781401974534e-05	113.175	-0.231407	0.258384	-0.895593	0.37047	0.54464	C2orf80
NM_001099402.2	225.053	-0.260979	0.131579	-1.98344	0.0473188	0.11986	1429.2	0.225856	0.0816973	2.76454	0.00570028	0.0116498	568.517	-0.502685	0.129761	-3.87393	0.000107095	0.00118042	CCNK
NM_001099415.3	232.864	0.477903	0.137796	3.46819	0.000523968	0.00328522	2977.79	0.611318	0.0771425	7.92454	2.28999426686921e-15	3.57366327535312e-14	913.363	-0.140057	0.138512	-1.01116	0.31194	0.490723	POM121C
NM_001099625.2	71.9033	-0.0388697	0.227931	-0.170533	0.864591	0.921407	908.764	-0.292201	0.0962578	-3.03561	0.00240051	0.00540163	279.542	0.276702	0.204098	1.35573	0.175185	0.332693	MTFR1L
NM_001099645.2	601.933	-0.126393	0.103855	-1.21702	0.223598	0.37817	1163.31	-0.160214	0.111625	-1.43529	0.151205	0.209161	944.054	0.0237487	0.156291	0.151952	0.879225	0.928444	RPL22L1
NM_001099652.2	44.1205	1.43108	0.275196	5.20024	1.99032162109782e-07	3.30118902587037e-06	346.96	1.38427	0.178622	7.7497	9.21134176174666e-15	1.34998220915199e-13	125.975	0.0333775	0.31073	0.107416	0.914459	0.9499	GPR137C
NM_001099658.2	1165.54	-0.413222	0.0854684	-4.83479	1.3328424798242e-06	1.83059619419503e-05	3246.98	-0.193681	0.0853575	-2.26906	0.0232649	0.0404317	2043.34	-0.228023	0.115598	-1.97256	0.0485455	0.136719	LRRN3
NM_001099666.2	157.528	0.362123	0.151573	2.3891	0.0168896	0.0542176	2436.14	0.80338	0.113246	7.09414	1.30157762238227e-12	1.47029418549804e-11	709.276	-0.447947	0.182414	-2.45566	0.0140627	0.0541694	PTAR1
NM_001099673.3	230.248	-0.23922	0.138067	-1.73265	0.0831587	0.184692	503.828	0.0455373	0.161289	0.282334	0.777687	0.82321	373.908	-0.287191	0.222392	-1.29137	0.196575	0.359782	RBIS
NM_001099678.2	131.977	0.048627	0.16765	0.29005	0.771778	0.858417	1162.55	0.118191	0.100858	1.17185	0.241256	0.312149	403.68	-0.0708692	0.175158	-0.404601	0.685771	0.799813	LRRC58
NM_001099695.2	118.184	0.365821	0.175488	2.08459	0.0371066	0.100116	5334.31	-0.0474706	0.0836165	-0.567719	0.570226	0.641561	1292.13	0.416128	0.164184	2.53452	0.0112601	0.0457566	REPIN1
NM_001099771.2	1556.78	-0.0304897	0.30673	-0.0994024	0.920819	0.957965	43.179	1.8781	0.420979	4.46128	8.14727572896076e-06	3.17712193480377e-05	1798.83	-1.91668	0.602517	-3.18113	0.00146703	0.00950428	POTEF
NM_001099922.3	148.95	-0.176432	0.154919	-1.13887	0.254758	0.413706	341.045	-0.149012	0.135388	-1.10063	0.271058	0.344942	245.118	-0.0363411	0.17966	-0.202277	0.8397	0.90253	ALG13
NM_001100164.2	93.1894	-0.315405	0.202418	-1.55819	0.119189	0.239543	1115.93	0.0294616	0.127154	0.231701	0.81677	0.855011	348.996	-0.351438	0.22862	-1.53722	0.12424	0.265147	PHACTR2
NM_001100389.2	51.9149	-0.650775	0.255499	-2.54708	0.010863	0.0382016	368.714	-0.437839	0.140019	-3.127	0.00176601	0.00409189	139.581	-0.211839	0.256463	-0.826	0.408804	0.58119	TMEM192
NM_001100399.2	982.753	0.121072	0.0835157	1.44969	0.147145	0.280868	2840.62	0.649154	0.0821091	7.90599	2.6580422224658e-15	4.12510530547316e-14	1745.48	-0.537573	0.106676	-5.03929	4.67267751493373e-07	1.37282288522373e-05	PDS5A
NM_001100420.2	63.3497	-0.15993	0.22986	-0.695772	0.486571	0.636859	465.452	-0.0220992	0.157691	-0.140143	0.888547	0.913256	173.686	-0.151171	0.266098	-0.568104	0.569965	0.716556	C21orf91
NM_001100423.2	639.831	-0.148881	0.110458	-1.34785	0.177707	0.321694	2982.64	0.236074	0.0745963	3.16469	0.00155249	0.00365033	1381.99	-0.390997	0.131034	-2.98395	0.00284554	0.0157645	SPATS2L
NM_001100427.2	597.333	-0.35764	0.103711	-3.44843	0.000563858	0.00349408	1272.73	-0.0490002	0.0938271	-0.52224	0.601503	0.670397	962.534	-0.318403	0.13384	-2.37899	0.0173602	0.0633331	RAP1GDS1
NM_001100588.3	171.962	-0.74837	0.14822	-5.04904	4.44040847878203e-07	6.69985500198196e-06	1796.48	0.500729	0.0875018	5.7225	1.04970288657548e-08	6.90542250208555e-08	587.186	-1.25238	0.148148	-8.45357	2.82530512369767e-17	9.52918912120751e-15	RC3H2
NM_001100623.2	379.604	-0.0333676	0.106824	-0.312359	0.754768	0.846772	3594.11	-0.029987	0.0752496	-0.3985	0.690262	0.749302	1215.26	-0.0125086	0.111096	-0.112593	0.910353	0.947316	PLEKHB2
NM_001100624.3	263.033	0.240138	0.124179	1.9338	0.0531376	0.131218	1334.45	0.639827	0.110647	5.78259	7.35581069911172e-09	4.96694044562616e-08	591.694	-0.408198	0.162655	-2.50959	0.012087	0.0483378	CENPN
NM_001100913.3	94.8376	-0.38375	0.195611	-1.9618	0.049786	0.124694	2480.77	-0.0546991	0.077282	-0.707785	0.479079	0.554865	646.703	-0.329001	0.167893	-1.95958	0.0500444	0.139174	PACS2
NM_001101.5	37125.7	-0.0655323	0.0672987	-0.973753	0.330179	0.494565	172991	-0.273024	0.0743843	-3.67045	0.000242125	0.000686767	80161.6	0.199221	0.0983937	2.02473	0.042895	0.12543	ACTB
NM_001101662.2	1223.48	-0.320035	0.0779322	-4.10658	4.01558480039783e-05	0.000367053	2224.11	0.327742	0.0775788	4.22463	2.39336124660093e-05	8.4636404637457e-05	1888.48	-0.655951	0.0910417	-7.20496	5.80620514497482e-13	9.41498495815918e-11	NRDC
NM_001101669.3	70.2875	0.0203189	0.228135	0.0890651	0.92903	0.962052	221.196	0.272781	0.180101	1.5146	0.129874	0.183694	128.771	-0.257023	0.278303	-0.923536	0.355728	0.530509	INPP4B
NM_001102368.3	58.5388	-0.282665	0.245358	-1.15205	0.249302	0.407441	313.156	-0.18972	0.138683	-1.36801	0.171309	0.232842	135.157	-0.0869365	0.24454	-0.355511	0.722207	0.82796	DGLUCY
NM_001102371.2	95.0671	-0.459567	0.189298	-2.42774	0.015193	0.0501067	1143.38	-0.461915	0.105086	-4.39559	1.10474555462027e-05	4.19544424911446e-05	357.032	-0.00345608	0.190235	-0.0181674	0.985505	0.991073	FOXRED2
NM_001102401.4	121.412	0.098248	0.169071	0.581105	0.56117	0.700569	281.59	-0.0984583	0.139558	-0.705499	0.4805	0.555976	200.563	0.179902	0.18709	0.961578	0.336261	0.514117	TTI2
NM_001102420.3	655.869	0.568151	0.105031	5.40935	6.32550302736326e-08	1.16980190854724e-06	5591.99	0.577823	0.0938696	6.15559	7.48002074487325e-10	5.84190313410999e-09	1966.4	-0.0180973	0.147064	-0.123057	0.902062	0.94276	ZFAND5
NM_001102559.2	42.1743	-0.158114	0.286356	-0.552161	0.580838	0.716217	299.193	-0.334412	0.147955	-2.26023	0.0238068	0.0413053	113.319	0.180268	0.278943	0.646255	0.518114	0.675126	PLPP5
NM_001102564.3	75.6133	-0.311948	0.209342	-1.49013	0.136189	0.26538	263.634	-0.31802	0.148609	-2.13997	0.0323569	0.0542414	144.05	-0.00541552	0.223825	-0.0241953	0.980697	0.98867	IFT43
NM_001102575.2	129.889	0.389492	0.171498	2.27111	0.0231402	0.069818	1293.55	0.645776	0.100475	6.42721	1.29968422664179e-10	1.13028266025906e-09	429.765	-0.279391	0.177924	-1.57028	0.11635	0.252395	SNX18
NM_001103146.3	304.815	0.735049	0.127561	5.76232	8.29675164240697e-09	1.84608196834876e-07	791.408	0.514681	0.0994772	5.17386	2.2931253938805e-07	1.20851580326648e-06	521.914	0.21257	0.150268	1.4146	0.157185	0.309235	GIGYF2
NM_001104631.2	371.573	1.17557	0.115116	10.212	1.75159764161036e-24	2.23806407753033e-22	1745.79	1.26676	0.0900296	14.0705	5.76816742703158e-45	5.85642733826447e-43	805.729	-0.101344	0.135837	-0.74607	0.455625	0.624586	PDE4D
NM_001104647.3	65.8548	0.354074	0.221569	1.59803	0.110036	0.226381	1141.55	-0.45273	0.0948817	-4.77152	1.82840650398352e-06	8.14375349316551e-06	322.988	0.804458	0.194149	4.1435	3.42037816631033e-05	0.000479877	SLC25A36
NM_001105079.3	72.6297	0.371101	0.214107	1.73325	0.0830511	0.184502	1879.6	0.242464	0.0866068	2.79959	0.0051167	0.0106125	490.941	0.140038	0.184484	0.759081	0.447804	0.617751	FBRS
NM_001105192.3	162.578	0.886396	0.149356	5.93478	2.94232532999771e-09	7.1096359621406e-08	1611.97	1.1442	0.0905851	12.6312	1.42048450205852e-36	1.03193300852131e-34	536.522	-0.268391	0.152549	-1.75937	0.0785146	0.191008	TLE3
NM_001105203.2	64.4124	0.311311	0.229989	1.35359	0.175867	0.319605	1394.13	-0.0985236	0.0864022	-1.14029	0.254166	0.327	376.207	0.376798	0.193132	1.95099	0.0510588	0.141018	RUSC1
NM_001105206.3	116.751	0.114713	0.170135	0.674248	0.500154	0.648673	181.034	0.489274	0.164742	2.96994	0.0029786	0.00655883	173.426	-0.377109	0.197311	-1.91124	0.0559743	0.15055	LAMA4
NM_001105244.2	62.6284	-0.550204	0.233662	-2.3547	0.0185375	0.0583962	301.095	0.15668	0.133221	1.17609	0.239559	0.310244	137.263	-0.708367	0.228619	-3.09846	0.00194531	0.0118176	PTPRM
NM_001105539.3	326.343	-0.205685	0.117423	-1.75166	0.0798316	0.179	975.291	-0.186322	0.0870908	-2.1394	0.032403	0.054308	586.451	-0.0293558	0.122261	-0.240106	0.810248	0.884861	ZBTB10
NM_001105562.3	577.849	0.178679	0.100235	1.78261	0.0746503	0.169136	2009.8	0.276081	0.0734698	3.75775	0.000171449	0.000503942	1099.87	-0.102381	0.108406	-0.94442	0.344955	0.521265	UBE4B
NM_001105564.2	46.1459	-0.486577	0.271195	-1.7942	0.0727814	0.166152	464.267	-0.228342	0.120678	-1.89217	0.058469	0.0914983	153.649	-0.238939	0.244869	-0.975781	0.329173	0.506901	CCHCR1
NM_001105573.2	47.0872	-0.235582	0.260751	-0.903476	0.366273	0.530653	878.662	-0.167497	0.0962569	-1.74011	0.0818398	0.122346	244.535	-0.0797261	0.219404	-0.363375	0.716325	0.823195	FBXO45
NM_001106.4	83.1244	-0.0620764	0.207637	-0.298965	0.764966	0.854093	2079.29	-0.0581498	0.0909371	-0.639451	0.52253	0.596499	546.21	0.00663348	0.187482	0.0353819	0.971775	0.983438	ACVR2B
NM_001107.5	50.0729	0.0489751	0.256348	0.191049	0.848487	0.910922	145.597	-0.634773	0.237775	-2.66964	0.00759328	0.0149856	89.0806	0.676386	0.339172	1.99423	0.0461275	0.131848	ACYP1
NM_001109689.4	34.0195	0.41648	0.301978	1.37917	0.167841	0.308997	239.382	0.373507	0.150652	2.47928	0.013165	0.0244989	90.997	0.0109714	0.282012	0.0389039	0.968967	0.982011	ZNF250
NM_001110.4	1229.58	-0.16515	0.0795427	-2.07625	0.0378709	0.101871	2254.11	0.379079	0.0754224	5.02608	5.00610062204619e-07	2.47282590515728e-06	1901.94	-0.553343	0.091209	-6.06676	1.30513017751687e-09	8.59754504439239e-08	ADAM10
NM_001110303.4	49.7086	0.0891189	0.256724	0.347139	0.728487	0.826828	453.726	0.0683027	0.116561	0.585981	0.557889	0.630069	155.487	0.00747597	0.231286	0.0323234	0.974214	0.984756	USP20
NM_001110556.2	4911.5	0.142141	0.0873053	1.62809	0.103506	0.216439	24171.7	0.550717	0.0589748	9.33817	9.80143034989961e-21	2.57310447223065e-19	10887.6	-0.41779	0.11211	-3.72662	0.000194064	0.00190939	FLNA
NM_001110792.2	48.1451	0.855955	0.308436	2.77515	0.00551764	0.0221474	719.221	1.71174	0.511139	3.34888	0.00081139	0.00204534	211.487	-0.850352	0.680054	-1.25042	0.211147	0.378404	MECP2
NM_001111.5	879.136	0.00554637	0.0920026	0.0602849	0.951929	0.973752	4733.13	0.159788	0.0783899	2.03838	0.0415118	0.0674286	2036.39	-0.163755	0.114324	-1.43238	0.152036	0.302422	ADAR
NM_001111020.3	395.997	0.379944	0.109217	3.47879	0.000503689	0.00316513	2217.09	0.0429595	0.086522	0.496516	0.619531	0.686133	935.706	0.326977	0.129311	2.52861	0.0114514	0.0463333	SUPT5H
NM_001111067.4	90.3703	-0.782238	0.201539	-3.88132	0.000103893	0.000834372	322.458	-0.501544	0.131473	-3.81482	0.000136284	0.000411637	173.742	-0.285294	0.20734	-1.37597	0.16883	0.324942	ACVR1
NM_001111077.2	837.923	-0.243201	0.11617	-2.0935	0.0363048	0.0986652	3051.09	-0.160177	0.073557	-2.17759	0.0294364	0.0498314	1624.48	-0.0945395	0.146467	-0.645465	0.518626	0.675468	EZR
NM_001112732.3	116.28	0.230708	0.178291	1.294	0.195665	0.344046	1231.95	0.235356	0.127065	1.85225	0.0639903	0.0989987	400.724	-0.00953143	0.214563	-0.0444226	0.964568	0.979318	MCF2L
NM_001113378.2	1014.07	-0.227493	0.0814533	-2.79293	0.00522338	0.0211954	2182.57	-0.093785	0.0848999	-1.10465	0.269309	0.343158	1638.54	-0.142163	0.103797	-1.36963	0.170803	0.327354	FANCI
NM_001113407.3	389.301	0.38407	0.11208	3.42676	0.00061082	0.00373264	3291.59	-0.0559797	0.0770906	-0.726155	0.467744	0.544289	1160.82	0.43743	0.121946	3.58707	0.000334418	0.00298709	LDB1
NM_001113490.2	212.729	0.00535227	0.141055	0.0379446	0.969732	0.984915	1077.43	-0.279033	0.0893283	-3.12368	0.00178606	0.00413152	478.034	0.275387	0.148482	1.85468	0.0636417	0.16471	AMOT
NM_001113491.2	828.063	0.0946129	0.125273	0.755256	0.450096	0.607888	12326.6	-0.440134	0.0928759	-4.73894	2.14834637868994e-06	9.43905888071958e-06	3622.63	0.525841	0.175108	3.00296	0.00267368	0.0149997	SEPTIN9
NM_001113528.2	81.5596	0.293567	0.201754	1.45507	0.145649	0.278706	289.457	0.560693	0.143648	3.90324	9.49125195735916e-05	0.000294487	156.517	-0.273776	0.21715	-1.26077	0.207392	0.37398	METTL15
NM_001113738.2	40.9542	-0.103325	0.286631	-0.36048	0.718488	0.821	308.408	0.338498	0.144561	2.34156	0.0192033	0.0340922	113.932	-0.454745	0.276433	-1.64505	0.0999597	0.227478	ARL17A
NM_001114092.2	366.226	-0.856743	0.113308	-7.56119	3.99388916769289e-14	2.09195449386051e-12	1041.07	-0.674276	0.0900097	-7.49114	6.82777053444783e-14	9.03259376668632e-13	646.581	-0.186682	0.125451	-1.48809	0.136728	0.282127	THUMPD3
NM_001114118.3	195.656	0.927825	0.137289	6.75819	1.39724304328455e-11	5.07885801035284e-10	2191.52	0.421079	0.0944471	4.45836	8.25881198809434e-06	3.21464243065455e-05	700.004	0.498407	0.151768	3.284	0.00102344	0.00716683	NCBP3
NM_001114120.3	179.531	0.109799	0.155806	0.704717	0.480986	0.631898	527.001	0.227994	0.112802	2.02118	0.0432607	0.0699458	320.572	-0.120906	0.175094	-0.690521	0.489867	0.65233	DEPDC1
NM_001114122.3	593.47	-0.153541	0.0972002	-1.57964	0.11419	0.232096	1275.53	-0.0016261	0.0815912	-0.0199298	0.984099	0.988321	958.519	-0.162075	0.106578	-1.52071	0.128333	0.271069	CHEK1
NM_001114394.3	79.0285	0.269722	0.201729	1.33705	0.181208	0.325965	477.692	-0.179622	0.114522	-1.56845	0.116775	0.167187	194.348	0.446316	0.195098	2.28765	0.022158	0.0765096	TENT2
NM_001114600.3	53.3053	0.257806	0.244403	1.05484	0.291499	0.453044	6681.6	-0.019381	0.0694068	-0.279238	0.780062	0.825102	1509.55	0.294538	0.185105	1.5912	0.111565	0.245418	SZRD1
NM_001115016.3	167.971	0.57624	0.156648	3.67856	0.000234554	0.00168196	1722.4	0.155611	0.0745873	2.08629	0.0369525	0.0609033	566.422	0.420698	0.142415	2.95403	0.00313654	0.01691	KANSL3
NM_001116.4	41.0718	0.15229	0.282871	0.538373	0.590319	0.724623	325.596	0.448288	0.153287	2.92451	0.00344999	0.00746612	117.8	-0.284732	0.284371	-1.00127	0.316696	0.494974	ADCY9
NM_001122.4	112.406	-0.641542	0.179388	-3.57629	0.00034851	0.00232883	328.872	-0.735865	0.163731	-4.49436	6.97795109597602e-06	2.76071332797136e-05	200.459	0.0851968	0.233639	0.364652	0.715371	0.822895	PLIN2
NM_001122630.2	61.9939	0.963187	0.248765	3.87188	0.000107998	0.000860818	1213.53	0.559442	0.135708	4.1224	3.74952577127573e-05	0.000126846	334.467	0.389611	0.267251	1.45785	0.144883	0.292822	CDKN1C
NM_001122659.3	806.348	0.0421265	0.0877381	0.480139	0.631129	0.754451	1934.43	0.37397	0.0988336	3.78384	0.000154429	0.000459361	1346.15	-0.339303	0.128833	-2.63366	0.0084469	0.0368847	EDNRB
NM_001122764.3	47.1319	0.317503	0.260278	1.21986	0.222518	0.376882	200.804	-0.28498	0.168955	-1.68672	0.0916567	0.135388	97.6762	0.588873	0.270592	2.17624	0.0295371	0.0950597	PPOX
NM_001122769.3	36.7428	0.352929	0.305007	1.15712	0.247225	0.405575	150.161	0.668744	0.183371	3.64695	0.000265375	0.000745935	74.791	-0.362214	0.3076	-1.17755	0.238977	0.4109	LCA5
NM_001122955.4	481.363	0.334272	0.10641	3.14136	0.00168164	0.00868419	4715	-0.00141147	0.0745725	-0.0189275	0.984899	0.989007	1575.13	0.331678	0.117114	2.83209	0.0046245	0.0231417	BSCL2
NM_001122964.3	496.588	-0.057327	0.102924	-0.556984	0.577538	0.714027	1654.79	0.386198	0.0898328	4.29907	1.71515611806267e-05	6.2624006095815e-05	929.462	-0.451671	0.12548	-3.59956	0.000318761	0.0028839	PPP4R3B
NM_001123329.2	401.086	0.456426	0.115168	3.96312	7.39756561565723e-05	0.000620116	1037.4	0.330676	0.108584	3.04534	0.00232416	0.00525226	685.909	0.116621	0.156226	0.746488	0.455373	0.624443	ZBTB1
NM_001123363.4	885.132	1.12407	0.380393	2.95502	0.00312648	0.0142209	371.862	3.62106	2.58907	1.3986	NA	NA	1097.6	-2.49978	2.56091	-0.976128	0.329001	0.506877	RGPD6
NM_001123375.3	1265.06	0.841944	0.189935	4.43281	9.3014948045814e-06	0.000103074	3.79892	1.37101	1.08624	1.26216	0.206892	0.27353	1454.59	-0.538059	0.704466	-0.763784	0.444996	0.615208	H3C13
NM_001123385.2	657.206	1.03495	0.109835	9.42274	4.39446839088398e-21	4.41173237384817e-19	2921.14	1.1541	0.107877	10.6983	1.03664855944091e-26	4.26138410263831e-25	1388.86	-0.13103	0.166873	-0.785209	0.432331	0.603346	BCOR
NM_001124.3	138.461	0.610686	0.177537	3.43977	0.000582206	0.00358534	2902.4	0.424433	0.107133	3.96173	7.44096497423838e-05	0.000235379	788.443	0.166312	0.198969	0.83587	0.403228	0.576568	ADM
NM_001124767.2	49.5706	-0.378046	0.252914	-1.49476	0.134977	0.263364	190.661	-0.158613	0.172842	-0.917676	0.358788	0.436735	98.3041	-0.233611	0.268037	-0.871565	0.383446	0.557547	SMIM4
NM_001126.5	530.318	-0.153804	0.097605	-1.57578	0.115077	0.23339	1198.73	0.0399098	0.0980234	0.407146	0.683901	0.744027	869.306	-0.202593	0.125112	-1.61929	0.105384	0.236016	ADSS2
NM_001126111.3	118.504	0.000858171	0.173497	0.00494633	0.996053	0.999098	934.907	0.912215	0.117999	7.73069	1.0696804914227e-14	1.54883118577648e-13	338.973	-0.921306	0.195557	-4.7112	2.46258622212661e-06	5.40012884234442e-05	OSGIN2
NM_001126340.3	47.9134	0.554803	0.261214	2.12394	0.0336756	0.0934779	3723.44	0.60993	0.0706403	8.63431	5.90839925811852e-18	1.22334350241191e-16	862.53	-0.0430826	0.197421	-0.218226	0.827253	0.895544	ORAI2
NM_001127.4	510.965	-0.139826	0.102727	-1.36114	0.173468	0.316253	1929.59	-0.0790772	0.0892323	-0.886195	0.375512	0.453814	1005.56	-0.0697023	0.128411	-0.542805	0.587264	0.72971	AP1B1
NM_001127178.3	147.543	-0.193253	0.157516	-1.22688	0.219867	0.37377	472.533	0.243921	0.111433	2.18894	0.0286012	0.0485931	272.044	-0.438193	0.164319	-2.66673	0.00765934	0.03428	PIGG
NM_001127202.4	285.48	0.0152653	0.1204	0.126788	0.899108	0.944385	778.591	0.211335	0.099523	2.12348	0.0337138	0.0561919	496.922	-0.201775	0.136476	-1.47847	0.139283	0.285889	PCID2
NM_001127208.3	315.493	1.43576	0.11853	12.113	9.01477760671447e-34	2.00056893572166e-31	1054.15	1.55082	0.093818	16.5301	2.22813548465393e-61	3.29412240862783e-59	591.195	-0.120078	0.130402	-0.920822	0.357143	0.531679	TET2
NM_001127211.3	76.9907	0.0587612	0.222772	0.263772	0.791955	0.873633	365.094	0.186576	0.138966	1.34261	0.179399	0.242314	167.615	-0.156122	0.239574	-0.651666	0.514616	0.672022	SHTN1
NM_001127228.2	604.953	0.145821	0.0979584	1.4886	0.136592	0.26596	5207.78	-0.0892989	0.0744407	-1.1996	0.230296	0.29963	1823.94	0.226839	0.11118	2.04028	0.0413223	0.121918	CBX1
NM_001127453.2	121.645	0.0346038	0.185968	0.186074	0.852387	0.91274	553.801	-0.285019	0.107002	-2.66367	0.00772932	0.0152113	259.848	0.285402	0.191869	1.48748	0.136888	0.282215	GSDME
NM_001127496.3	243.794	1.18521	0.154004	7.69599	1.40398793912798e-14	7.63860018752663e-13	5232.89	0.721129	0.0838814	8.597	8.18253812089158e-18	1.68181094499399e-16	1414.87	0.463831	0.17175	2.70062	0.00692099	0.0316131	SPRY4
NM_001127649.3	38.9344	0.201069	0.306491	0.656038	0.5118	0.658832	1700.8	-0.0255273	0.0994231	-0.256754	0.797369	0.839404	413.41	0.154408	0.247778	0.623173	0.533171	0.687905	PEX26
NM_001127671.2	1407.23	-0.74077	0.0908641	-8.1525	3.56462270078018e-16	2.38575105045074e-14	4235.08	0.426229	0.10571	4.03206	5.52892156154768e-05	0.00018073	2535.88	-1.17858	0.15147	-7.78095	7.19798013819529e-15	1.68592690347952e-12	LIFR
NM_001127898.4	69.5132	-0.127571	0.220066	-0.579696	0.56212	0.701029	432.548	-0.191066	0.114497	-1.66874	0.0951687	0.140014	173.642	0.0700185	0.206532	0.339021	0.734594	0.836136	CLCN5
NM_001128.6	940.521	0.137015	0.0878788	1.55914	0.118963	0.23926	2126.47	0.333731	0.0768505	4.34261	1.40801828036779e-05	5.22243400029023e-05	1541.98	-0.207583	0.102526	-2.02467	0.0429009	0.12543	AP1G1
NM_001128126.3	45.8578	-0.504698	0.265019	-1.90439	0.05686	0.137827	247.718	-0.132894	0.158922	-0.83622	0.403031	0.481614	106.403	-0.391418	0.270587	-1.44655	0.148022	0.296536	AP4S1
NM_001128148.3	765.212	0.132846	0.0959046	1.38519	0.165994	0.306544	1592.77	0.341851	0.0905004	3.77734	0.000158514	0.000470186	1224.74	-0.21882	0.124824	-1.75303	0.0795975	0.192864	TFRC
NM_001128159.3	365.247	-0.0772707	0.1121	-0.689301	0.490634	0.640482	989.753	-0.124266	0.086812	-1.43144	0.152304	0.210404	634.28	0.0333565	0.119763	0.278521	0.780613	0.866354	VPS53
NM_001128174.3	54.5878	-0.245835	0.246192	-0.998548	0.318014	0.482948	153.213	-0.193282	0.191293	-1.0104	0.312303	0.388857	95.9578	-0.0542824	0.276933	-0.196012	0.8446	0.906745	UGT8
NM_001128203.2	65.3031	0.17304	0.224257	0.771614	0.440343	0.598938	340.864	-0.451755	0.138339	-3.26556	0.00109248	0.00266652	148.924	0.629431	0.23127	2.72163	0.00649613	0.0300633	PLAAT3
NM_001128205.2	71.0676	-0.34774	0.228603	-1.52115	0.128222	0.252758	300.464	0.0261346	0.14689	0.177919	0.858786	0.889175	146.808	-0.395152	0.242159	-1.63179	0.102724	0.231349	SULF1
NM_001128214.2	50.0439	-0.0922673	0.267612	-0.344781	0.730259	0.827948	277.624	-0.315186	0.140638	-2.24112	0.0250182	0.0431761	117.679	0.189238	0.259067	0.730458	0.46511	0.632924	KCTD6
NM_001128219.3	137.151	1.37496	0.165521	8.30689	9.82427277178901e-17	6.96202456172242e-15	3086.5	0.812465	0.0743808	10.9231	8.94398446143294e-28	3.90523093556971e-26	826.971	0.557281	0.147734	3.77219	0.00016182	0.00164394	VGLL4
NM_001128424.2	36.7227	0.498092	0.300569	1.65717	0.0974859	0.207548	439.343	0.816481	0.157845	5.17266	2.30780772957621e-07	1.21549348357117e-06	137.494	-0.339918	0.306158	-1.11027	0.266882	0.442808	GASK1B
NM_001128431.4	109.085	0.209182	0.184114	1.13615	0.255893	0.41499	905.779	0.339208	0.0962286	3.52502	0.000423444	0.00113281	321.737	-0.134442	0.177799	-0.756146	0.449562	0.619521	SLC39A14
NM_001128591.2	43.8576	0.345937	0.284158	1.21741	0.223447	0.378076	256.517	-0.630189	0.161761	-3.89581	9.7870991680064e-05	0.000302442	105.977	0.948455	0.293201	3.23483	0.00121716	0.00823025	PSMG4
NM_001128626.2	121.074	0.142959	0.170735	0.837315	0.402416	0.563851	772.083	0.689061	0.101438	6.79291	1.09897533912568e-11	1.08697948155071e-10	306.556	-0.55761	0.169485	-3.29003	0.00100178	0.00703329	SPIRE1
NM_001128636.4	175.643	-0.107904	0.147516	-0.731472	0.464491	0.619395	4099.15	0.0239249	0.0897039	0.266709	0.789693	0.832616	1090.35	-0.140241	0.154511	-0.907641	0.364068	0.537905	ELFN1
NM_001128917.2	247.22	0.376395	0.136251	2.76251	0.00573581	0.0228228	2786.02	-0.114068	0.0832292	-1.37053	0.170522	0.231929	887.969	0.48721	0.146016	3.33669	0.00084782	0.00616809	TOMM40
NM_001128918.3	323.118	0.243678	0.117988	2.06528	0.0388963	0.103966	1902.2	0.501449	0.0807147	6.21261	5.21114050264019e-10	4.17436131328412e-09	783.832	-0.261291	0.125969	-2.07424	0.0380568	0.115221	MARK3
NM_001129.5	198.237	0.613258	0.140023	4.37968	1.18853423331818e-05	0.000126872	1500.26	0.397273	0.0906072	4.38457	1.16217685505788e-05	4.38980921451041e-05	553.088	0.209745	0.147958	1.4176	0.156307	0.308132	AEBP1
NM_001129993.3	132.822	-0.023112	0.162917	-0.141864	0.887188	0.936998	545.299	0.280034	0.110768	2.52811	0.0114678	0.021634	270.892	-0.319366	0.170058	-1.87799	0.0603832	0.158597	SANBR
NM_001129994.2	61.8473	1.18583	0.243539	4.86918	1.12064675827186e-06	1.56661408668678e-05	2368.36	0.651037	0.0817607	7.96272	1.68301755345153e-15	2.66093600805554e-14	584.655	0.557769	0.198022	2.8167	0.00485196	0.023939	KCTD15
NM_001130.6	242.086	-0.272506	0.27527	-0.989961	0.322193	0.486753	6597.24	-0.237697	0.0954009	-2.49156	0.0127184	0.0237487	1708.03	-0.0344493	0.306457	-0.112411	0.910497	0.947348	TLE5
NM_001130004.2	1601.6	-0.266768	0.0899984	-2.96414	0.00303533	0.0139265	4644.31	-0.0585221	0.076398	-0.766017	0.443666	0.522248	2847.48	-0.216482	0.1168	-1.85344	0.0638199	0.16507	ACTN1
NM_001130009.3	111.226	-0.610765	0.178603	-3.41968	0.000626952	0.00381464	689.196	-0.466092	0.0985947	-4.72735	2.27466952212959e-06	9.93708660600623e-06	277.163	-0.154196	0.169335	-0.910595	0.362509	0.535914	GEN1
NM_001130021.3	380.847	-0.0863473	0.107226	-0.805285	0.420655	0.581252	1392.66	-0.238099	0.0986231	-2.41423	0.0157686	0.0286321	739.55	0.143155	0.135503	1.05647	0.290752	0.468496	ATP6V0A1
NM_001130028.2	83.081	2.22271	0.219492	10.1266	4.21043830130191e-24	5.29949644699687e-22	582.773	1.12856	0.108635	10.3885	2.79594180843376e-25	1.00689750511416e-23	221.86	1.08315	0.209919	5.15987	2.471221412586e-07	7.85658422514315e-06	CLK3
NM_001130031.2	89.544	-0.876776	0.206841	-4.23888	2.24639429736475e-05	0.000220931	665.64	0.0158983	0.130767	0.121578	0.903234	0.925456	247.211	-0.892176	0.229485	-3.88773	0.000101184	0.0011391	ZNF562
NM_001130040.2	271.271	-0.225772	0.129782	-1.73963	0.0819247	0.182861	9932.55	-0.543797	0.0841661	-6.46101	1.04008259143191e-10	9.13949530552316e-10	2463.64	0.316589	0.142101	2.22791	0.0258866	0.0861048	SHC1
NM_001130053.5	477.067	0.363374	0.104069	3.49167	0.000480019	0.00303448	5708.8	-0.344681	0.0728046	-4.73434	2.19774030759509e-06	9.62596547406642e-06	1785.36	0.703466	0.11269	6.24247	4.30702418479697e-10	3.21387857754053e-08	EEF1D
NM_001130058.2	72.5823	0.048116	0.212524	0.226403	0.820888	0.893232	257.839	0.635943	0.173077	3.67433	0.000238478	0.000678022	139.342	-0.600985	0.256338	-2.3445	0.0190526	0.0679574	SLC44A5
NM_001130072.2	122.048	-0.112877	0.186459	-0.605372	0.544932	0.686413	3563.04	0.097856	0.0781044	1.25289	0.210247	0.27753	912.658	-0.196538	0.171432	-1.14645	0.251609	0.425811	EPN1
NM_001130082.3	164.203	0.199631	0.153098	1.30395	0.192252	0.340004	1806.73	0.381633	0.0894624	4.26585	1.99146878513896e-05	7.16877721160444e-05	580.491	-0.194697	0.158084	-1.23161	0.218095	0.386908	PLXNB1
NM_001130100.2	57.8472	0.464364	0.246611	1.88298	0.0597035	0.142865	1181.86	0.99149	0.0908075	10.9186	9.3941765592772e-28	4.08065597242417e-26	322.835	-0.569421	0.205832	-2.76644	0.00566725	0.027059	KIFC3
NM_001130111.2	56.8219	0.1922	0.240354	0.799655	0.423911	0.58422	3207.78	-0.262801	0.0825338	-3.18417	0.00145171	0.00344607	760.474	0.445825	0.19642	2.26975	0.0232228	0.0792129	ABHD17A
NM_001130142.2	110.135	-0.206185	0.178507	-1.15505	0.248068	0.406431	212.48	-0.180853	0.156723	-1.15396	0.248515	0.320268	172.661	-0.0343736	0.205247	-0.167474	0.866997	0.921675	VWA5A
NM_001130144.3	46.565	0.22049	0.268211	0.822075	0.411034	0.571356	843.448	0.0481455	0.0949772	0.506917	0.612213	0.679905	236.351	0.17418	0.222853	0.781591	0.434455	0.605312	LTBP3
NM_001130145.3	436.707	0.443672	0.106665	4.15951	3.18931777401932e-05	0.000298839	3806.53	0.548673	0.0792532	6.92304	4.42041017405879e-12	4.59886376997449e-11	1327.34	-0.114911	0.121784	-0.943565	0.345392	0.521645	YAP1
NM_001130158.3	830.112	-0.0668022	0.0970484	-0.68834	0.491239	0.640875	1411	0.261114	0.0942635	2.77004	0.00560495	0.0115034	1260.04	-0.336428	0.132536	-2.5384	0.0111362	0.0454405	MYO1B
NM_001130438.3	2400.02	0.0242162	0.0806683	0.300195	0.764029	0.853724	4240.21	0.324415	0.0726678	4.46437	8.03062087939022e-06	3.14032678193139e-05	3677.99	-0.309837	0.103996	-2.97932	0.00288884	0.0159311	SPTAN1
NM_001130445.3	178.325	-0.533762	0.154742	-3.44937	0.000561889	0.00348669	1388.51	0.330788	0.0912062	3.62682	0.000286936	0.000799079	505.937	-0.863477	0.159884	-5.40066	6.63968159974164e-08	2.60399047669868e-06	ITPRID2
NM_001130475.3	151.877	-0.791068	0.16559	-4.77726	1.77699854532438e-06	2.38621476635677e-05	554.222	-0.563041	0.122122	-4.61047	4.01758981722609e-06	1.66043302549114e-05	294.655	-0.232614	0.1906	-1.22043	0.222301	0.392718	THAP5
NM_001130520.3	212.568	-0.208636	0.145416	-1.43476	0.151357	0.285994	783.248	-0.323739	0.108369	-2.98738	0.00281383	0.00622857	413.99	0.114467	0.169494	0.675345	0.499456	0.660614	ZNF195
NM_001130528.3	836.398	-0.17137	0.0895085	-1.91457	0.0555471	0.135221	4850.19	0.307162	0.0969955	3.16676	0.00154146	0.00362883	2012.72	-0.485066	0.134245	-3.61328	0.000302349	0.00275612	SPAG9
NM_001130823.3	705.556	0.377895	0.0973681	3.88109	0.000103987	0.000834372	2924.72	0.53365	0.0774796	6.88761	5.67368921767427e-12	5.82365152708174e-11	1445.15	-0.162634	0.117496	-1.38416	0.166309	0.321112	DNMT1
NM_001130842.2	160.442	0.877822	0.152753	5.74667	9.10190455219218e-09	1.99886357001658e-07	1863.05	1.45261	0.0819808	17.7189	2.99791133213814e-70	5.74168154452912e-68	588.532	-0.56868	0.143723	-3.95677	7.59711129005676e-05	0.000906174	ZNF286A
NM_001130864.2	103.602	-0.033254	0.183256	-0.181462	0.856005	0.914916	555.908	-0.172525	0.107333	-1.60739	0.107969	0.156333	239.544	0.136658	0.179582	0.760976	0.446672	0.617027	PWWP2A
NM_001130919.3	77.5025	-0.314164	0.215042	-1.46094	0.144032	0.27649	665.411	-0.503994	0.112914	-4.46354	8.06171415762349e-06	3.1510234325739e-05	233.262	0.190505	0.212795	0.895249	0.370654	0.544771	RABL2B
NM_001130924.3	57.6157	0.0641702	0.2491	0.257608	0.796709	0.876994	601.278	0.318552	0.114022	2.79377	0.00520967	0.0107761	196.593	-0.256338	0.229071	-1.11903	0.263127	0.439126	TMEM201
NM_001130929.2	205.079	-0.311474	0.143492	-2.17068	0.0299557	0.08543	1722.12	-0.417358	0.0843477	-4.94806	7.49556588205073e-07	3.5889280504569e-06	608.883	0.107847	0.147025	0.73353	0.463235	0.631425	STMP1
NM_001130963.2	336.423	0.14341	0.113079	1.26822	0.204718	0.355225	2545.78	-0.0287635	0.0740169	-0.388607	0.697567	0.756161	938.418	0.158901	0.112279	1.41524	0.156998	0.309064	NEMP1
NM_001130965.3	204.98	0.0375039	0.148582	0.252412	0.800723	0.87946	1655.25	0.0389216	0.0871783	0.44646	0.655265	0.717972	594.382	-0.0176812	0.153689	-0.115045	0.908409	0.946057	SUN1
NM_001131007.2	369.285	-0.0130601	0.112125	-0.116479	0.907273	0.949495	399.219	0.22532	0.119498	1.88555	0.0593558	0.0927311	511.015	-0.247132	0.138792	-1.7806	0.0749785	0.184968	TMEM131L
NM_001131016.2	226.612	0.0906166	0.136016	0.666219	0.505271	0.652856	2324.6	0.692082	0.0777307	8.90359	5.40703500940071e-19	1.24494765093497e-17	764.616	-0.605091	0.136511	-4.43254	9.31277333800698e-06	0.000163594	CIZ1
NM_001131035.2	72.8455	0.152125	0.210256	0.72352	0.46936	0.623325	542.31	-0.484162	0.1172	-4.13108	3.61060097218975e-05	0.000122737	201.222	0.621963	0.206513	3.01173	0.00259763	0.0147199	ZCCHC9
NM_001134225.2	94.1923	0.55414	0.194594	2.84768	0.00440396	0.01856	987.248	0.736592	0.0919311	8.01243	1.12461517848058e-15	1.82956218321541e-14	322.319	-0.191051	0.174964	-1.09194	0.274858	0.451335	INPP4A
NM_001134231.2	520.733	-0.532695	0.11586	-4.59775	4.27067885731455e-06	5.2270877799323e-05	7194.22	0.269499	0.06453	4.17633	2.96247334207251e-05	0.000102064	2158.28	-0.804686	0.125594	-6.40703	1.48378355490327e-10	1.25112629349444e-08	NT5DC2
NM_001134232.2	452.753	-0.385934	0.109737	-3.5169	0.000436626	0.00280623	1044.71	-0.191965	0.115293	-1.66502	0.0959095	0.140971	746.827	-0.201114	0.159398	-1.26171	0.207052	0.373607	TMEM106B
NM_001134337.3	55.0852	0.564225	0.248705	2.26865	0.0232899	0.0701441	681.995	1.0836	0.124347	8.7143	2.92552785118036e-18	6.28913857191247e-17	211.233	-0.522037	0.241681	-2.16003	0.0307707	0.0979088	RNF24
NM_001134375.2	156.064	0.268951	0.15055	1.78645	0.0740261	0.168083	1763.2	0.315392	0.0950812	3.31708	0.000909636	0.00226522	561.585	-0.0522451	0.15752	-0.331672	0.740137	0.838822	CCNJ
NM_001134382.3	130.028	0.225778	0.16314	1.38395	0.166373	0.306941	1290.95	0.42106	0.110386	3.81443	0.000136496	0.000411982	429.343	-0.203144	0.182377	-1.11387	0.265335	0.44137	IQSEC1
NM_001134389.2	92.8668	-0.423776	0.190099	-2.22925	0.0257976	0.0758282	923.564	-0.5057	0.0885065	-5.7137	1.10546099654342e-08	7.24395009165737e-08	306.846	0.077599	0.168395	0.460816	0.644931	0.770154	ZDHHC4
NM_001134398.2	114.485	0.36495	0.172931	2.11038	0.0348257	0.0955696	1076.54	0.0749186	0.0916076	0.81782	0.41346	0.492192	364.911	0.281474	0.163575	1.72076	0.0852936	0.203335	VAV2
NM_001134438.2	396.498	0.18283	0.113287	1.61386	0.106557	0.221057	1246.18	0.0743812	0.0893419	0.832546	0.405101	0.483608	725.813	0.104542	0.130638	0.800241	0.423571	0.594862	PHLDB2
NM_001134479.2	231.188	-2.64128	0.159977	-16.5104	3.08970987003327e-61	1.53267784317592e-58	818.035	-1.22958	0.121631	-10.1091	5.0362817338874e-24	1.68415659410592e-22	442.963	-1.42016	0.194015	-7.31987	2.48206442885452e-13	4.45292920512793e-11	LRRC8D
NM_001134647.2	95.6923	0.218609	0.184933	1.1821	0.237166	0.393473	234.947	0.82742	0.145595	5.68302	1.32334695852565e-08	8.57174851613808e-08	160.923	-0.612255	0.196259	-3.11963	0.00181075	0.0111692	AFAP1
NM_001134665.3	52.436	0.13782	0.24474	0.563131	0.573346	0.71088	221.39	-0.200715	0.162494	-1.23521	0.216752	0.284911	108.248	0.329101	0.256092	1.28509	0.198761	0.362604	TRMT10A
NM_001134693.2	155.939	0.519368	0.175326	2.9623	0.00305351	0.0139649	2915	-0.564548	0.125895	-4.48427	7.31641964082092e-06	2.88109665014943e-05	810.904	1.07689	0.225327	4.77922	1.75974801475229e-06	4.22283680622644e-05	OST4
NM_001134831.2	83.5849	-0.0899132	0.205033	-0.43853	0.661002	0.776907	418.11	0.466078	0.139691	3.33648	0.000848452	0.00212922	186.735	-0.563101	0.229171	-2.45712	0.0140054	0.0539981	AHI1
NM_001135036.2	71.6883	0.254135	0.237264	1.0711	0.284123	0.445479	53.7947	-0.820858	0.287258	-2.85757	0.00426902	0.00902309	94.0282	1.05846	0.316952	3.33951	0.000839251	0.00611631	TVP23C
NM_001135179.2	35.3405	0.382574	0.29791	1.28419	0.199074	0.348369	1523.85	0.248254	0.0818953	3.03136	0.00243453	0.00546505	370.947	0.14645	0.227567	0.643548	0.519869	0.676889	ZDHHC3
NM_001135553.4	38.4756	0.226398	0.294279	0.769332	0.441696	0.600391	318.404	-0.151217	0.136942	-1.10425	0.269486	0.343305	113.209	0.345949	0.271561	1.27392	0.20269	0.368326	MKNK1
NM_001135570.3	34.3869	0.59351	0.307273	1.93154	0.0534164	0.131675	290.876	0.341778	0.142647	2.39597	0.0165762	0.0299374	102.585	0.249572	0.282293	0.884087	0.376649	0.55099	C12orf73
NM_001135586.1	76.2062	0.0381141	0.211157	0.180501	0.856759	0.915374	1920.44	0.349358	0.105395	3.31475	0.000917266	0.00228354	503.886	-0.333545	0.203923	-1.63564	0.101915	0.230264	C5orf24
NM_001135629.3	178.256	-0.639168	0.157476	-4.05883	4.9319459367477e-05	0.000440584	401.275	-0.0709348	0.135412	-0.523845	0.600386	0.669771	291.885	-0.575595	0.196586	-2.92796	0.0034119	0.0181738	PPP1R21
NM_001135638.2	470.57	0.705648	0.100422	7.02681	2.11314193172623e-12	8.91006295512365e-11	2030.75	0.699888	0.113693	6.15596	7.46232168842932e-10	5.83348653695676e-09	981.062	-0.00313554	0.155597	-0.0201516	0.983922	0.98991	PIP5K1A
NM_001135651.3	462.841	-0.55395	0.102551	-5.4017	6.60130252644527e-08	1.21547563767496e-06	1710.45	-0.0463995	0.0742926	-0.624551	0.532266	0.605236	902.745	-0.515357	0.102392	-5.0332	4.82351476818804e-07	1.41221793490839e-05	EIF2AK2
NM_001135653.2	631.501	-0.0312234	0.0909732	-0.343215	0.731436	0.828833	3866.86	0.0102176	0.0696548	0.14669	0.883377	0.90894	1563.95	-0.0503935	0.09458	-0.532814	0.594163	0.735356	PABPC4
NM_001135673.4	332.162	0.58162	0.119857	4.85263	1.21832287587756e-06	1.67877725690776e-05	864.702	0.663861	0.10808	6.14231	8.13302802321192e-10	6.31677669600063e-09	569.243	-0.0912916	0.153176	-0.595991	0.551181	0.700374	ATL2
NM_001135674.2	94.4539	-0.815531	0.195099	-4.18009	2.91388900851118e-05	0.000275789	623.416	-0.62867	0.117421	-5.35399	8.60362474470514e-08	4.84644022216779e-07	243.659	-0.186528	0.203421	-0.916955	0.359166	0.53356	SMIM19
NM_001135726.3	74.9863	0.2105	0.20705	1.01666	0.309313	0.473895	109.543	1.72908	0.276325	6.25743	3.91362803925766e-10	3.19575033787057e-09	109.961	-1.52608	0.331022	-4.6102	4.02272443188904e-06	8.2129812129996e-05	HMBOX1
NM_001135812.2	550.426	0.342394	0.0976448	3.50653	0.000453997	0.00290482	3282.58	0.223747	0.0715793	3.12586	0.00177283	0.0041043	1344.14	0.105588	0.101741	1.03782	0.299353	0.477696	SINHCAF
NM_001135993.2	45.2784	0.509992	0.271472	1.87862	0.0602966	0.144003	170.503	0.338885	0.166489	2.03549	0.0418021	0.0678348	88.9833	0.142052	0.270012	0.526096	0.598821	0.738196	TTC39C
NM_001135998.3	271.487	0.134693	0.133653	1.00778	0.313561	0.478494	1863.7	-0.290324	0.0783557	-3.70521	0.000211213	0.000607947	715.97	0.403887	0.139446	2.89636	0.00377518	0.0196617	NDUFB11
NM_001136018.4	142.031	-0.354896	0.160099	-2.21673	0.0266415	0.0777435	470.677	-0.339419	0.11675	-2.90724	0.00364633	0.00785226	265.229	-0.0198682	0.171608	-0.115777	0.907829	0.945671	EPHX1
NM_001136035.4	74.8815	0.126541	0.225746	0.560546	0.575107	0.712379	725.791	-0.127035	0.095729	-1.32703	0.1845	0.248046	243.33	0.28985	0.198296	1.46171	0.143822	0.291446	TRMT1
NM_001136044.2	40.1528	0.651738	0.296024	2.20164	0.027691	0.0801092	1529.67	-0.202788	0.100488	-2.01804	0.0435873	0.0703795	377.734	0.843349	0.245389	3.43678	0.000588674	0.004626	TMUB1
NM_001136050.3	54.5237	0.0461599	0.243519	0.189554	0.849659	0.911405	354.566	-0.426521	0.13684	-3.11694	0.00182738	0.00421554	139.472	0.45611	0.24078	1.8943	0.0581853	0.154453	DHRS1
NM_001136108.3	50.7133	-0.420178	0.250027	-1.68053	0.092854	0.200317	735.341	-0.210431	0.112197	-1.87555	0.0607168	0.0945243	217.681	-0.215526	0.229911	-0.937434	0.348536	0.524233	R3HCC1
NM_001136139.4	142.258	0.519601	0.166077	3.12867	0.00175601	0.00900756	1291.94	0.664655	0.092172	7.21103	5.55310798717316e-13	6.57247766965003e-12	443.692	-0.145345	0.168194	-0.864149	0.387506	0.561321	TCF3
NM_001136156.2	191.702	-0.569962	0.175008	-3.25678	0.00112684	0.00625172	852.906	-0.379223	0.0945697	-4.00999	6.07224396500302e-05	0.000196735	405.183	-0.181834	0.194231	-0.936173	0.349184	0.524928	ZNF507
NM_001136157.2	152.023	0.0792977	0.152867	0.518736	0.603945	0.732815	1548.4	-0.108206	0.0868617	-1.24573	0.212865	0.280503	510.346	0.176986	0.150133	1.17886	0.238453	0.410251	OTUD5
NM_001136191.3	53.3379	0.174836	0.253127	0.690704	0.489751	0.639924	771.116	-0.261266	0.118397	-2.20671	0.0273345	0.0467522	228.426	0.397431	0.239478	1.65957	0.097001	0.222743	KANK2
NM_001136193.2	656.051	-0.569156	0.103997	-5.47281	4.4294345253176e-08	8.35647010111931e-07	859.365	-0.291176	0.0966057	-3.01407	0.0025777	0.00574968	940.253	-0.283543	0.12973	-2.18564	0.0288419	0.0935724	FASTKD2
NM_001136200.2	78.6693	0.260769	0.212741	1.22576	0.220289	0.374083	665.924	-0.0567311	0.106588	-0.532246	0.594556	0.664323	234.736	0.305183	0.201638	1.51352	0.130149	0.273502	BORCS7
NM_001136201.2	69.6671	-0.150387	0.214412	-0.701392	0.483058	0.633831	752.899	-0.451084	0.11344	-3.9764	6.99678229984416e-05	0.000223087	243.214	0.293864	0.208935	1.40648	0.159581	0.312273	ISOC2
NM_001136203.2	84.4138	0.4485	0.210588	2.12975	0.0331927	0.0924113	2004.41	-0.370077	0.104324	-3.54738	0.000389088	0.00105125	531.387	0.801641	0.207382	3.86552	0.000110851	0.00120917	CCDC124
NM_001136223.3	129.96	-0.32417	0.184988	-1.75239	0.0797075	0.178769	753.925	-0.371518	0.0987233	-3.76323	0.000167735	0.000494232	312.726	0.0130683	0.187575	0.0696697	0.944457	0.967168	RCOR3
NM_001136262.2	96.2671	-0.152298	0.194734	-0.782078	0.434169	0.592642	3586.05	-0.0974572	0.0697106	-1.39803	0.162105	0.221943	887.846	-0.073132	0.156208	-0.468171	0.639662	0.766685	ATXN7L3B
NM_001136265.2	199.549	2.1575	0.168253	12.8229	1.22002622211769e-37	3.31886488100596e-35	3271.53	2.23311	0.0908915	24.569	2.710978369275e-133	2.07685588344367e-130	939.377	-0.0880847	0.183719	-0.479452	0.631617	0.760842	IFFO2
NM_001136472.2	55.238	0.755929	0.242558	3.11648	0.00183022	0.00929774	1042.06	0.0674646	0.0855412	0.788679	0.4303	0.509003	289.356	0.701112	0.198458	3.5328	0.000411179	0.00352343	LITAF
NM_001136528.2	99.0846	-0.0126193	0.183962	-0.0685973	0.94531	0.969687	344.874	0.167697	0.134979	1.24239	0.214092	0.281899	188.634	-0.186699	0.198957	-0.938388	0.348045	0.523818	SERPINE2
NM_001137550.2	128.8	0.0738721	0.168959	0.437219	0.661952	0.777363	408.499	-0.00163609	0.117607	-0.0139114	0.988901	0.991883	236.597	0.0578556	0.176821	0.327199	0.743518	0.841261	LRRFIP1
NM_001137608.3	88.732	-0.822383	0.219921	-3.73945	0.000184424	0.00136067	117.469	0.140932	0.21077	0.668653	0.503717	0.578219	127.469	-0.964859	0.277921	-3.4717	0.000517172	0.00416106	ZNF732
NM_001137675.4	35.094	0.301469	0.304401	0.990368	0.321994	0.486627	1476.65	0.632356	0.106257	5.95119	2.66200661491043e-09	1.92721045909366e-08	360.534	-0.321491	0.252952	-1.27096	0.203744	0.369217	ATXN1L
NM_001141947.3	53.3085	-0.0288873	0.244751	-0.118027	0.906046	0.949155	156.803	-0.0267167	0.176882	-0.151043	0.879942	0.905959	95.2613	0.00362842	0.257577	0.0140867	0.988761	0.992764	CCDC66
NM_001141969.2	122.131	0.579689	0.170789	3.39418	0.000688349	0.00412825	1766.35	0.459305	0.0783473	5.86242	4.56161598126847e-09	3.17692048546689e-08	523.329	0.122458	0.15064	0.81292	0.416264	0.588521	DAXX
NM_001141980.3	1216.91	-0.213708	0.0779254	-2.74247	0.00609796	0.0239516	2247.05	0.222532	0.0805077	2.76411	0.00570789	0.0116579	1885.81	-0.444995	0.0952742	-4.67067	3.00217797859955e-06	6.39251634231096e-05	TP53BP1
NM_001142276.2	3678.47	-0.0931366	0.0669481	-1.39118	0.164172	0.303811	13150.5	0.099559	0.0647317	1.53803	0.124042	0.176369	7078.47	-0.20065	0.0771781	-2.59983	0.009327	0.0399215	APLP2
NM_001142286.2	370.843	-0.180451	0.110815	-1.62839	0.103441	0.216403	945.379	0.196919	0.110445	1.78297	0.0745915	0.113115	631.206	-0.386323	0.148546	-2.60069	0.00930353	0.0398817	SMC6
NM_001142327.2	168.636	0.25655	0.155644	1.64831	0.0992894	0.210379	1685.76	0.134311	0.0904294	1.48525	0.137477	0.192637	559.207	0.129268	0.160983	0.802989	0.421981	0.593419	DMTF1
NM_001142416.2	318.944	-0.469322	0.119517	-3.92684	8.60703387629478e-05	0.000707438	906.649	-0.358966	0.094262	-3.80817	0.000139997	0.000421791	563.042	-0.114606	0.132418	-0.865483	0.386774	0.560646	AIMP1
NM_001142524.2	102.179	-0.714762	0.188423	-3.7934	0.000148599	0.00112692	351.396	-0.405154	0.121593	-3.33207	0.000862039	0.0021601	193.621	-0.333048	0.189494	-1.75757	0.0788215	0.191589	BHLHB9
NM_001142551.2	215.061	-0.183989	0.136641	-1.34652	0.178135	0.322087	497.444	-0.164011	0.111751	-1.46764	0.142201	0.198333	354.985	-0.0330761	0.15186	-0.217806	0.82758	0.895554	WDR47
NM_001142556.2	793.178	-0.316546	0.0881127	-3.59251	0.000327502	0.00220593	1009.89	0.143369	0.0924257	1.55119	0.120857	0.172387	1130.66	-0.468345	0.108883	-4.30137	1.69748160077142e-05	0.000268006	HMMR
NM_001142565.3	300.484	0.578138	0.130057	4.44527	8.77822299472311e-06	9.76606260085752e-05	2918.22	0.233625	0.0726509	3.21572	0.00130116	0.00311857	977.998	0.336876	0.132649	2.5396	0.0110979	0.0453161	CPSF7
NM_001142568.3	239.446	0.276059	0.13818	1.99782	0.0457366	0.117055	966.239	0.564706	0.108017	5.22791	1.71433436630391e-07	9.19000999035819e-07	484.707	-0.298035	0.168075	-1.77322	0.0761915	0.187521	BBX
NM_001142569.3	40.7758	0.536942	0.291526	1.84183	0.0654996	0.153518	878.745	0.0727737	0.11524	0.631499	0.527714	0.601132	237.366	0.453918	0.257333	1.76393	0.0777434	0.189789	INAVA
NM_001142572.2	91.3826	-0.727834	0.2179	-3.34022	0.000837122	0.00483855	165.073	-0.493069	0.208614	-2.36355	0.0181006	0.0323851	140.773	-0.241215	0.296398	-0.81382	0.415748	0.587988	ZNF669
NM_001142616.3	225.042	0.0710768	0.143879	0.494004	0.621303	0.74636	1100.98	0.565729	0.0997568	5.67109	1.41895886044692e-08	9.12095066131671e-08	497.362	-0.502191	0.16456	-3.05172	0.00227532	0.013379	EHBP1
NM_001142684.2	92.0754	0.190338	0.195537	0.973409	0.33035	0.494733	327.647	0.232071	0.125536	1.84865	0.0645091	0.099655	176.872	-0.0555094	0.196283	-0.282803	0.777328	0.864131	ZMYM5
NM_001142725.2	107.278	-1.13994	0.195196	-5.83999	5.22045577907492e-09	1.19630716263421e-07	547.521	-0.791072	0.127458	-6.20653	5.41659825393036e-10	4.32142256552529e-09	241.941	-0.351002	0.216464	-1.62152	0.104906	0.235383	ERI2
NM_001142730.3	95.1985	-0.185233	0.198185	-0.934651	0.349968	0.514609	752.478	0.0978648	0.100739	0.971464	0.331317	0.408121	272.509	-0.280724	0.185688	-1.5118	0.130584	0.27397	KCTD1
NM_001142749.3	74.1683	-0.108892	0.228682	-0.47617	0.633953	0.756592	541.374	-0.0228462	0.112289	-0.203459	0.838777	0.873285	202.55	-0.0822745	0.215042	-0.382598	0.702018	0.813106	ELAPOR2
NM_001142782.2	96.7131	0.0982474	0.199963	0.491329	0.623194	0.748206	540.443	0.28052	0.105357	2.66258	0.00775441	0.0152536	228.351	-0.189315	0.192738	-0.98224	0.325981	0.503821	MAGI3
NM_001142930.2	1025.88	-0.0333362	0.0809238	-0.411945	0.68038	0.790963	3193.77	-0.0271274	0.0764643	-0.354772	0.722761	0.776875	1871.29	-0.0159047	0.0955519	-0.166451	0.867802	0.92197	API5
NM_001142966.3	203.842	-0.405743	0.153275	-2.64715	0.00811729	0.0303696	1327.66	0.201581	0.0859238	2.34604	0.0189742	0.0337403	522.024	-0.605354	0.158172	-3.8272	0.000129612	0.00137643	GREB1L
NM_001143667.2	295.27	-0.217972	0.127368	-1.71136	0.0870138	0.19129	1163.56	-0.245612	0.0917819	-2.67603	0.00744989	0.0147406	591.517	0.0220164	0.142779	0.1542	0.877452	0.927483	ZBED5
NM_001143674.4	97.4029	-0.440566	0.205551	-2.14334	0.0320857	0.0900427	354.748	-0.210685	0.144983	-1.45317	0.146176	0.20297	188.827	-0.227396	0.235981	-0.963619	0.335237	0.513109	MPC2
NM_001143676.3	59.4336	0.256956	0.6538	0.393019	0.694306	0.802175	182.474	0.368522	0.269963	1.36508	0.172227	0.233788	107.902	-0.12984	0.773578	-0.167844	0.866706	0.921572	SGK1
NM_001143688.3	178.44	-0.183442	0.145818	-1.25802	0.208385	0.35977	584.736	0.146532	0.11354	1.29057	0.196852	0.262148	331.826	-0.342784	0.163547	-2.09594	0.0360878	0.110787	DIS3L
NM_001143775.2	116.756	0.0372052	0.175303	0.212233	0.831925	0.900304	2243.59	-0.212088	0.0799821	-2.65169	0.00800893	0.0157216	620.418	0.251704	0.157601	1.5971	0.110244	0.243836	CTDNEP1
NM_001143780.3	62.1091	0.11881	0.23946	0.496161	0.619781	0.745104	1481.14	-0.30323	0.0922832	-3.28586	0.00101672	0.00250012	392.385	0.447584	0.207369	2.15839	0.0308972	0.0982092	SLC25A39
NM_001143820.2	199.388	-0.122693	0.297305	-0.412686	0.679837	0.790715	1245.02	-0.153161	0.148151	-1.03382	0.301221	0.377063	499.039	0.0172085	0.366071	0.0470087	0.962506	0.978049	ETS1
NM_001143835.2	141.697	0.37516	0.159565	2.35114	0.0187158	0.05887	656.882	0.466606	0.111003	4.20356	2.6275431379048e-05	9.16865673835351e-05	305.254	-0.0921188	0.171853	-0.536033	0.591936	0.733781	NFRKB
NM_001143842.2	137.333	0.0943211	0.167514	0.563065	0.573391	0.71088	1535.88	-0.189384	0.0875765	-2.1625	0.0305796	0.0515904	490.637	0.265569	0.161055	1.64893	0.0991616	0.225993	TMEM106C
NM_001143852.2	37.3681	0.864225	0.304794	2.83544	0.00457628	0.0191238	474.957	-0.120881	0.142925	-0.845765	0.397684	0.476394	145.858	0.982367	0.292627	3.35706	0.000787767	0.00583183	TCHP
NM_001143992.2	97.2985	0.393945	0.198619	1.98342	0.0473208	0.11986	527.633	-0.133007	0.108706	-1.22355	0.221123	0.289619	226.19	0.520175	0.194657	2.67226	0.00753423	0.0338278	WRAP53
NM_001143998.2	629.289	-0.218738	0.0974924	-2.24364	0.0248554	0.0734747	4563.5	0.039074	0.0785384	0.497515	0.618826	0.685443	1712.51	-0.264175	0.116921	-2.25944	0.0238562	0.0808814	SEC14L1
NM_001144.6	309.158	-0.471156	0.119974	-3.92717	8.59527253546003e-05	0.00070716	1839.99	0.115719	0.0767035	1.50865	0.131389	0.1854	754.166	-0.588974	0.119611	-4.92406	8.47659014928317e-07	2.26903517900812e-05	AMFR
NM_001144060.2	375.768	0.745865	0.12639	5.90129	3.60663353017335e-09	8.49573758657873e-08	1498.22	0.495546	0.103507	4.78755	1.68833045107274e-06	7.58398758592215e-06	756.771	0.241676	0.168594	1.43348	0.151721	0.301938	NHSL1
NM_001144061.2	2239.93	-0.1179	0.0776144	-1.51904	0.128752	0.253509	2221.7	0.446038	0.0944388	4.72304	2.32350294777527e-06	1.01189453958151e-05	3056.57	-0.572556	0.120872	-4.73688	2.17037582154934e-06	5.00016637358034e-05	COPB1
NM_001144068.2	65.8844	-0.982322	0.245444	-4.00223	6.2748177564929e-05	0.000541731	366.176	-1.01341	0.131499	-7.70659	1.29222811344986e-14	1.85197386259217e-13	155.028	0.0515455	0.245249	0.210176	0.83353	0.899457	ZNF772
NM_001144072.2	146.164	0.443407	0.163554	2.71108	0.00670651	0.0259312	780.04	0.236061	0.0925135	2.55164	0.0107217	0.020328	337.088	0.184138	0.159382	1.15533	0.247957	0.42159	UBAC2
NM_001144757.3	57.8993	0.00247871	0.237648	0.0104302	0.991678	0.996879	172.484	-0.33144	0.177007	-1.87246	0.0611428	0.0951348	103.92	0.324337	0.258414	1.25511	0.209439	0.376158	SCG5
NM_001144758.3	230.347	0.54255	0.12786	4.24331	2.20247559774157e-05	0.000217743	2126.91	0.564753	0.0955012	5.91357	3.34766970223297e-09	2.39074682887434e-08	725.943	-0.0305237	0.1477	-0.206661	0.836275	0.900731	PHLDB1
NM_001144831.2	741.44	0.100422	0.11359	0.884074	0.376656	0.539644	4957.93	-0.238412	0.0674197	-3.53624	0.000405861	0.00109021	1926.51	0.333303	0.134529	2.47756	0.0132283	0.0518539	PHB2
NM_001144877.3	51.4169	-0.186783	0.266984	-0.699604	0.484175	0.634616	331.243	0.315575	0.147681	2.13687	0.032609	0.0546096	130.919	-0.501749	0.276595	-1.81402	0.0696743	0.175214	SCAI
NM_001144888.2	212.4	0.542761	0.153302	3.54046	0.000399434	0.00260311	1452.84	0.426503	0.117019	3.64474	0.000267661	0.000751611	559.078	0.106117	0.198493	0.534613	0.592917	0.734394	BAIAP2
NM_001144952.2	327.32	-0.10621	0.1202	-0.883608	0.376908	0.539912	1890.26	0.174673	0.07753	2.25297	0.0242609	0.0420153	786.025	-0.280146	0.125872	-2.22564	0.0260383	0.0864731	SDK2
NM_001144955.2	106.721	-0.668799	0.18282	-3.65825	0.000253947	0.00179659	382.946	-0.412736	0.124521	-3.31459	0.000917779	0.00228415	205.665	-0.269209	0.19078	-1.4111	0.158216	0.310466	DTWD1
NM_001144967.3	99.0992	0.333194	0.19745	1.68748	0.0915102	0.198185	584.721	0.709567	0.105536	6.72349	1.77420277043522e-11	1.71655645768744e-10	240.713	-0.370728	0.195033	-1.90084	0.0573226	0.153005	NEDD4L
NM_001144989.2	65.0151	-0.00966313	0.223843	-0.0431692	0.965567	0.982542	380.684	0.248272	0.123144	2.01611	0.0437888	0.0706642	157.264	-0.260647	0.215182	-1.21128	0.225787	0.39771	ZNF814
NM_001144995.2	42.9715	0.844675	0.28303	2.9844	0.00284137	0.0132164	2249.49	0.745799	0.0883111	8.44514	3.03678356348378e-17	5.82937929145281e-16	537.259	0.0800382	0.227838	0.351294	0.725368	0.829666	CCDC85C
NM_001145064.3	80.1597	0.860204	0.203636	4.22423	2.39757242502776e-05	0.000232132	1040	0.943133	0.0971339	9.70962	2.7436410691761e-22	8.34680985196642e-21	317.705	-0.083106	0.188229	-0.441516	0.65884	0.780244	CASTOR2
NM_001145108.2	1022.89	-0.263775	0.0870987	-3.02846	0.00245806	0.0117978	3394.54	0.301065	0.0813208	3.70219	0.00021375	0.000614558	1911.58	-0.57354	0.111344	-5.15108	2.58993800305033e-07	8.14864076183597e-06	NELL2
NM_001145191.2	67.1765	-0.926132	0.234959	-3.94167	8.09159282246616e-05	0.000670299	767.824	-0.289487	0.105017	-2.75658	0.00584086	0.0119006	243.617	-0.646794	0.215455	-3.00199	0.00268219	0.0150374	FAM200B
NM_001145206.2	42.7026	0.845114	0.291302	2.90116	0.00371782	0.016287	403.332	0.38428	0.137534	2.79406	0.00520501	0.0107691	136.522	0.425795	0.278751	1.52751	0.126634	0.268785	KIAA1671
NM_001145263.2	740.123	0.0857557	0.0888977	0.964656	0.334717	0.498723	2379.49	0.137363	0.0713686	1.92469	0.0542678	0.0855455	1366.45	-0.0627163	0.0934645	-0.671017	0.502209	0.663111	NCOA4
NM_001145306.2	608.739	-0.0830861	0.0959033	-0.866353	0.386297	0.548366	6537.32	0.204647	0.0775626	2.63847	0.00832801	0.0162567	2116.71	-0.296078	0.11201	-2.64332	0.00820984	0.0361113	CDK6
NM_001145312.3	108.176	1.01135	0.185407	5.45474	4.9045127374924e-08	9.17067758653513e-07	961.389	0.645317	0.0927784	6.95547	3.5139422186592e-12	3.72946990889686e-11	332.76	0.363831	0.172964	2.10351	0.0354215	0.109165	ETV3
NM_001145313.3	57.1072	0.0562024	0.239517	0.234648	0.814482	0.888209	442.358	0.0498477	0.148997	0.334555	0.737961	0.790057	161.497	-0.0137676	0.259006	-0.0531554	0.957608	0.974908	FSD1L
NM_001145315.2	159.114	-0.247074	0.160248	-1.54182	0.123117	0.245137	674.338	-0.40629	0.119264	-3.40664	0.000657667	0.00169071	328.994	0.15591	0.187997	0.829324	0.406921	0.579588	DSN1
NM_001145344.1	78.478	-0.29332	0.204096	-1.43717	0.150671	0.285338	263.137	-0.393688	0.143169	-2.74981	0.00596307	0.0121232	147.226	0.0944878	0.21271	0.444209	0.656891	0.779006	ZNF566
NM_001145358.2	419.626	-0.00208208	0.105358	-0.0197619	0.984233	0.992401	1503.01	0.144545	0.0822229	1.75796	0.0787536	0.118401	808.068	-0.154017	0.114055	-1.35038	0.176896	0.334961	SIN3A
NM_001145365.3	40.1545	-0.107754	0.28028	-0.384453	0.700643	0.807948	546.601	0.247171	0.112823	2.19079	0.0284667	0.048394	164.672	-0.374904	0.244075	-1.53602	0.124534	0.265638	ZNF652
NM_001145374.2	44.735	0.159703	0.274189	0.582456	0.56026	0.699744	304.331	-1.06039	0.150654	-7.03861	1.94162604514507e-12	2.13604212564458e-11	117.363	1.21642	0.277647	4.38119	1.1803409543616e-05	0.000197866	ALKBH2
NM_001145418.2	328.513	0.0944455	0.115473	0.817902	0.413413	0.573973	1690.83	0.449254	0.0796989	5.63689	1.73148702475686e-08	1.0954385253473e-07	744.209	-0.362425	0.120308	-3.01248	0.0025912	0.0147003	TTC28
NM_001145440.3	58.7441	-0.205418	0.254093	-0.808439	0.418838	0.579398	46.6265	-0.563964	0.339503	-1.66114	0.0966844	0.141969	77.6112	0.355295	0.364623	0.974418	0.329849	0.50741	TYW1B
NM_001145450.3	75.7377	-0.560153	0.230414	-2.43107	0.0150541	0.0497407	346.056	-0.253293	0.146146	-1.73315	0.083069	0.123964	162.085	-0.332079	0.257071	-1.29178	0.196433	0.359681	MORN2
NM_001145543.2	93.8098	-0.79739	0.205682	-3.87681	0.000105835	0.000846784	1832.35	-1.44275	0.0815422	-17.6933	4.72622166705337e-70	8.85063777516861e-68	504.64	0.615294	0.180517	3.40852	0.000653169	0.00499909	ZSCAN18
NM_001145638.3	54.2717	0.714203	0.240399	2.9709	0.00296925	0.013668	1702.18	0.345597	0.0912087	3.78908	0.000151208	0.000451172	431.41	0.348653	0.204863	1.70188	0.0887776	0.208982	GPSM1
NM_001145667.2	1882.07	-0.136593	0.0845321	-1.61588	0.106121	0.220369	3381.06	0.170066	0.0778046	2.1858	0.02883	0.0489129	2896.55	-0.315884	0.113613	-2.78035	0.00543011	0.0261573	GLG1
NM_001145860.2	96.182	0.675316	0.190852	3.53843	0.000402519	0.00261513	376.47	0.200427	0.120395	1.66474	0.0959653	0.140987	192.158	0.458031	0.192078	2.38461	0.0170973	0.0627075	POP1
NM_001146.5	57.4342	0.253647	0.247488	1.02488	0.305418	0.468972	177.177	0.759416	0.179058	4.24118	2.22349397808821e-05	7.91943522964892e-05	104.411	-0.501577	0.270437	-1.85469	0.0636402	0.16471	ANGPT1
NM_001146069.2	80.06	0.416821	0.225434	1.84897	0.0644619	0.151449	1686.69	-0.192361	0.0854971	-2.24992	0.0244541	0.0423151	457.576	0.64318	0.197658	3.25401	0.00113789	0.00777657	MFSD10
NM_001146070.2	128.186	-0.524437	0.170662	-3.07296	0.00211947	0.0104219	251.79	0.147555	0.156445	0.943175	0.345591	0.422869	201.902	-0.682698	0.205897	-3.31572	0.000914075	0.00652623	TDRD3
NM_001146105.2	131.947	-0.419196	0.165107	-2.53893	0.0111191	0.0389399	228.282	-0.230455	0.155265	-1.48427	0.137736	0.192968	201.131	-0.201653	0.194439	-1.0371	0.299688	0.477821	PARP9
NM_001146108.2	379.373	-0.176334	0.13362	-1.31967	0.186946	0.33365	914.727	-0.0860681	0.0886004	-0.97142	0.331339	0.408121	634.303	-0.108763	0.156968	-0.692903	0.48837	0.650955	PTGR1
NM_001146154.2	64.5099	-0.543568	0.236365	-2.29969	0.0214656	0.0658253	136.617	-0.407654	0.196987	-2.06945	0.0385038	0.0631637	103.763	-0.130933	0.274188	-0.477529	0.632985	0.761982	PTGR2
NM_001146156.2	373.938	0.14239	0.110961	1.28325	0.199404	0.348874	2501.7	0.569579	0.0866815	6.57094	4.99993901455929e-11	4.57486276609024e-10	972.256	-0.435041	0.13015	-3.34262	0.000829904	0.00606872	GSK3B
NM_001146213.3	364.788	0.103338	0.127538	0.810256	0.417793	0.578354	560.69	0.0250691	0.119081	0.210521	0.833261	0.868509	540.806	0.0682254	0.170767	0.399522	0.689508	0.802965	TBC1D15
NM_001146274.2	130.854	0.395779	0.162641	2.43346	0.0149554	0.0495188	887.902	-0.0670388	0.0941751	-0.711853	0.476556	0.552474	342.844	0.447988	0.158667	2.82346	0.00475087	0.0235914	TCF7L2
NM_001146334.2	103.629	0.313823	0.22819	1.37527	0.169048	0.310382	498.764	0.00146911	0.119909	0.0122518	0.990225	0.992698	227.271	0.287755	0.257442	1.11774	0.263676	0.439825	NACAD
NM_001148.6	533.348	0.0929702	0.100788	0.922435	0.356301	0.521195	1374.24	0.200328	0.0800175	2.50355	0.0122955	0.0230306	910.828	-0.109158	0.107799	-1.0126	0.311251	0.490208	ANK2
NM_001151.4	156.639	0.00267996	0.159294	0.016824	0.986577	0.993747	952.29	-0.27138	0.092589	-2.93102	0.0033785	0.00733022	386.384	0.268051	0.160171	1.67352	0.0942241	0.218089	SLC25A4
NM_001152.5	1199.84	0.179048	0.0782286	2.28878	0.0220924	0.0674285	4930.31	-0.023303	0.0696713	-0.334471	0.738024	0.790057	2447.56	0.193255	0.0878026	2.20102	0.0277348	0.0909961	SLC25A5
NM_001153484.2	185.125	-0.723749	0.16178	-4.47366	7.68916551049869e-06	8.64569770000473e-05	1444.71	-0.570444	0.0976712	-5.84045	5.20597233100607e-09	3.5989113070868e-08	525.818	-0.165966	0.18091	-0.917398	0.358934	0.533398	SCOC
NM_001154.4	1924.11	0.336114	0.0779921	4.30959	1.63557832507329e-05	0.000168411	6643.19	0.371197	0.0794515	4.67199	2.98295926946235e-06	1.26572999817519e-05	3651.59	-0.0434963	0.107583	-0.404306	0.685988	0.799813	ANXA5
NM_001155.5	2117.29	-0.106534	0.0735405	-1.44864	0.147437	0.28124	4698.87	0.0307086	0.0795529	0.386015	0.699485	0.757656	3452.19	-0.146099	0.100849	-1.44869	0.147425	0.295763	ANXA6
NM_001156.5	560.318	-0.219283	0.0949261	-2.31004	0.0208861	0.0644466	1136.02	-0.441214	0.0843006	-5.23381	1.66047347203945e-07	8.92398593678345e-07	890.147	0.215552	0.103096	2.09078	0.0365478	0.111981	ANXA7
NM_001159699.2	44.7042	-0.215712	0.264107	-0.816761	0.414065	0.574784	428.34	-0.178481	0.160786	-1.11005	0.266976	0.340828	144.221	-0.0407354	0.285915	-0.142474	0.886706	0.933421	FHL1
NM_001159702.3	43.1595	-0.146537	0.271087	-0.540555	0.588814	0.723197	172.561	0.327475	0.24993	1.31027	0.190105	0.254288	86.9993	-0.486215	0.372854	-1.30404	0.192222	0.354508	FHL1
NM_001159773.2	75.2981	0.261557	0.225003	1.16246	0.245048	0.402903	2043.6	-0.250915	0.0837327	-2.99662	0.00272993	0.00605557	529.312	0.521254	0.188357	2.76737	0.00565098	0.0270119	CANT1
NM_001160148.2	100.414	1.08967	0.19287	5.64973	1.60696362476937e-08	3.35433768506932e-07	1017.68	0.920942	0.103765	8.87529	6.97534295818698e-19	1.5843993290739e-17	336.093	0.173224	0.191813	0.903088	0.366479	0.540456	DDHD1
NM_001160372.4	140.422	-0.227348	0.1666	-1.36463	0.172368	0.315105	467.502	-0.0971803	0.112226	-0.865935	0.386526	0.465189	262.748	-0.128598	0.175157	-0.734185	0.462836	0.631333	TRAPPC9
NM_001161.5	46.3445	0.164904	0.277299	0.594681	0.552057	0.691959	453.532	-0.739455	0.133321	-5.54642	2.91578940986977e-08	1.79746579056127e-07	151.503	0.868076	0.26548	3.26983	0.00107611	0.00743751	NUDT2
NM_001161346.2	59.7839	-0.101065	0.260946	-0.387303	0.698532	0.805954	1091.08	-0.356896	0.0947447	-3.76692	0.000165276	0.000487668	305.118	0.291418	0.22454	1.29785	0.194339	0.357058	CHFR
NM_001162371.3	63.0564	0.714283	0.252132	2.83297	0.00461173	0.0192053	3208.52	-0.267455	0.0892086	-2.99808	0.00271682	0.00602967	767.913	0.980868	0.214269	4.57774	4.70035751071047e-06	9.34750342696006e-05	LOC728392
NM_001162383.2	166.43	0.143536	0.147789	0.971218	0.33144	0.495836	1290.09	0.0632164	0.0892416	0.708374	0.478713	0.554594	470.965	0.0759776	0.149302	0.508887	0.610832	0.746779	ARHGEF2
NM_001162498.3	72.2763	0.945844	0.239868	3.94319	8.04062684201245e-05	0.000666732	269.445	1.0716	0.168945	6.34288	2.25501999026089e-10	1.90793709416953e-09	141.495	-0.124688	0.284618	-0.438087	0.661323	0.781538	LPAR6
NM_001162499.2	42.738	0.343027	0.275648	1.24444	0.213338	0.365419	263.679	-0.0701159	0.164055	-0.427393	0.669093	0.730842	106.242	0.393537	0.285362	1.37908	0.167869	0.323389	CAND2
NM_001162501.2	299.502	0.189244	0.128371	1.4742	0.140427	0.271611	1126.82	0.234529	0.0996048	2.35459	0.018543	0.0330572	588.504	-0.0507774	0.155989	-0.325519	0.744788	0.841943	TNRC6B
NM_001162529.3	135.881	0.240344	0.164268	1.46312	0.143434	0.275531	425.331	0.276743	0.129889	2.13061	0.0331216	0.0553471	248.362	-0.0435386	0.189417	-0.229856	0.818204	0.889517	FAM135A
NM_001162536.3	1188.15	0.164204	0.0912414	1.79967	0.071913	0.164758	492.811	-0.470591	0.1342	-3.50665	0.000453786	0.001209	1472.3	0.625794	0.154285	4.05608	4.99023983152759e-05	0.000649347	RBMXL1
NM_001163315.3	107.112	-0.204418	0.185771	-1.10038	0.271169	0.431465	469.582	0.0142108	0.123263	0.115288	0.908217	0.929212	224.873	-0.234315	0.199171	-1.17645	0.239414	0.411391	FBXL17
NM_001163424.2	149.116	-0.266193	0.172019	-1.54746	0.121752	0.243301	1554.9	-0.210547	0.148929	-1.41375	0.157437	0.21643	508.51	-0.0617462	0.247344	-0.249637	0.802868	0.881138	COPS9
NM_001163435.3	246.113	-0.27167	0.137713	-1.97273	0.0485262	0.122338	395.34	0.11952	0.137555	0.868888	0.384909	0.463441	368.642	-0.399626	0.184517	-2.1658	0.0303264	0.0968606	TBCK
NM_001163735.2	61.6516	0.156177	0.240012	0.650705	0.515237	0.662044	772.313	0.0843046	0.112433	0.74982	0.453363	0.531214	238.272	0.0923371	0.226227	0.408161	0.683155	0.798277	MYO19
NM_001163788.4	290.95	0.137472	0.118198	1.16307	0.244802	0.402577	1642.78	0.0939063	0.0931827	1.00777	0.313567	0.390084	690.478	0.0357235	0.136887	0.260972	0.794114	0.875405	PTBP3
NM_001164.5	193.915	0.199224	0.140419	1.41878	0.155962	0.292273	1374.07	0.0260739	0.0804903	0.323938	0.745985	0.796454	520.676	0.165851	0.133097	1.24609	0.21273	0.380111	APBB1
NM_001164094.2	110.854	-0.0421072	0.186731	-0.225497	0.821593	0.893547	1095.54	-0.610544	0.0878351	-6.95102	3.62649003028445e-12	3.83443305962448e-11	364.723	0.572244	0.169651	3.37307	0.000743346	0.00558836	COPS7A
NM_001164161.2	953.626	0.340943	0.0906608	3.76064	0.00016948	0.00126145	2301.33	0.543633	0.0852097	6.37995	1.77147385430135e-10	1.51248329991869e-09	1594.97	-0.211722	0.118215	-1.79099	0.0732946	0.181976	PPP6R3
NM_001164211.2	37.4818	0.31368	0.296419	1.05823	0.289949	0.45105	69.6764	0.916876	0.315383	2.90718	0.00364705	0.00785226	58.1728	-0.614793	0.401924	-1.52962	0.12611	0.267983	LRCH1
NM_001164273.2	542.434	0.00915584	0.100165	0.0914074	0.927169	0.961251	911.466	-0.245387	0.0985812	-2.48919	0.0128036	0.0239025	820.98	0.245489	0.125822	1.95107	0.0510481	0.141018	MGA
NM_001164380.2	371.651	-0.128251	0.109527	-1.17095	0.241617	0.398679	815.326	0.290163	0.0948597	3.05887	0.00222174	0.00503567	603.944	-0.424753	0.122939	-3.45499	0.000550319	0.00437351	STAU2
NM_001164463.1	893.875	1.03941	0.3509	2.96213	0.00305522	0.0139649	449.368	1.17127	0.160673	7.28979	3.10439708098029e-13	3.80797004387495e-12	1124.74	-0.141109	0.416553	-0.338755	0.734794	0.836203	RGPD8
NM_001164473.3	699.112	0.487331	0.101303	4.81064	1.50451332608676e-06	2.05300337846111e-05	3035.3	0.489316	0.0743789	6.57869	4.74597342377109e-11	4.35667952528529e-10	1461.37	-0.00887965	0.115826	-0.0766639	0.938891	0.963989	FNBP1L
NM_001164664.2	65.3844	0.281452	0.226942	1.24019	0.214903	0.367453	264.266	-0.175421	0.144328	-1.21544	0.224199	0.292874	132.426	0.456641	0.23237	1.96514	0.049398	0.13838	MAST4
NM_001164665.2	220.924	-0.316512	0.136462	-2.31942	0.0203724	0.0631387	1107.48	0.828947	0.103955	7.97406	1.5353889737094e-15	2.45051569724414e-14	494.136	-1.15161	0.159341	-7.2273	4.92685257667417e-13	8.47820835235033e-11	KIAA1549
NM_001164760.2	38.43	0.337627	0.300471	1.12366	0.261159	0.420055	420.339	-0.227322	0.12002	-1.89404	0.0582194	0.0911416	135.274	0.528386	0.258634	2.04298	0.041054	0.121343	PRKAR1B
NM_001165963.4	62.86	0.15509	0.24675	0.628531	0.529656	0.675222	542.581	0.0246015	0.125349	0.196265	0.844403	0.877842	189.891	0.128681	0.248682	0.517452	0.604841	0.743477	SCN1A
NM_001166.5	340.188	-0.168127	0.116386	-1.44456	0.148581	0.282531	1359.37	0.0340413	0.0845635	0.402553	0.687277	0.74664	685.669	-0.204829	0.125632	-1.6304	0.103018	0.231824	BIRC2
NM_001166037.2	155.22	-0.625488	0.162361	-3.85245	0.00011694	0.00091951	1076.28	-0.232005	0.0967151	-2.39885	0.0164468	0.0297355	411.587	-0.396062	0.167017	-2.37139	0.0177214	0.0643528	ZNF260
NM_001166105.3	140.262	-1.21632	0.166536	-7.30364	2.80079470876595e-13	1.31217232105685e-11	541.24	-1.2441	0.125154	-9.94054	2.77324715459851e-23	8.85233097416728e-22	278.445	0.0218853	0.188237	0.116265	0.907443	0.945454	TADA2A
NM_001166108.2	2624.47	0.189386	0.0784933	2.41276	0.0158321	0.0515825	9199.45	0.094266	0.0906913	1.03942	0.298611	0.374241	5010.52	0.0880036	0.125432	0.701606	0.482925	0.646894	PALLD
NM_001166114.2	71.0481	0.059533	0.220174	0.270391	0.78686	0.870241	730.123	-0.0319949	0.0954905	-0.335058	0.737581	0.789784	239.926	0.0842702	0.193113	0.436378	0.662563	0.782564	PNPLA6
NM_001166160.2	93.5636	0.358198	0.187984	1.90547	0.0567192	0.137605	571.434	0.183678	0.103613	1.77273	0.0762734	0.115293	231.412	0.167159	0.177199	0.943337	0.345508	0.521728	PPP1R9A
NM_001166269.2	126.082	0.0687504	0.170752	0.402632	0.687219	0.796388	530.014	-0.26349	0.130384	-2.02088	0.0432921	0.0699832	259.803	0.322165	0.202318	1.59237	0.111302	0.245166	HAUS4
NM_001166271.3	155.416	0.11931	0.151673	0.786626	0.431501	0.590722	2322.18	0.396678	0.0845303	4.69273	2.69579623332313e-06	1.1561055907488e-05	682.046	-0.280632	0.14663	-1.91388	0.0556354	0.149926	SPATA13
NM_001166293.2	209.061	0.181692	0.138343	1.31335	0.189066	0.336161	920.805	0.541161	0.115377	4.69039	2.72690936778823e-06	1.16707289194268e-05	439.909	-0.370116	0.17234	-2.14759	0.0317467	0.100438	SSX2IP
NM_001166412.2	403.798	0.124882	0.127164	0.982052	0.326074	0.490495	2323.82	0.24366	0.117965	2.06553	0.0388725	0.0636322	967.822	-0.124319	0.188838	-0.65834	0.51032	0.668689	SMOC2
NM_001166693.3	139.457	0.195904	0.168147	1.16508	0.243988	0.401574	842.591	0.246637	0.100198	2.46149	0.0138362	0.0256033	342.906	-0.060985	0.172349	-0.353847	0.723454	0.828881	AFF1
NM_001167.4	197.758	-0.0872929	0.14366	-0.607634	0.54343	0.685843	1180.81	0.00773098	0.0860039	0.089891	0.928374	0.945198	483.278	-0.104418	0.144649	-0.721873	0.470372	0.637624	XIAP
NM_001167608.3	58.6127	-0.318844	0.246774	-1.29205	0.19634	0.345017	507.569	-0.301015	0.109879	-2.73952	0.00615293	0.0124671	177.359	-0.01829	0.218689	-0.0836348	0.933347	0.960788	RHBDD1
NM_001167675.2	246.973	-0.0680402	0.126741	-0.536846	0.591374	0.725179	715.456	0.294412	0.140283	2.0987	0.0358432	0.0593186	438.951	-0.369315	0.191667	-1.92686	0.0539972	0.146751	CADM2
NM_001167740.2	75.2591	0.0271288	0.214042	0.126745	0.899142	0.944385	197.917	0.179433	0.166406	1.07828	0.280907	0.355436	129.404	-0.170169	0.239235	-0.711304	0.476896	0.64226	SMYD3
NM_001167856.3	518.415	0.407415	0.102684	3.96764	7.25879751741532e-05	0.000610303	1259.27	0.603757	0.0953445	6.33237	2.41416786702147e-10	2.0222855482495e-09	868.817	-0.206678	0.129998	-1.58986	0.111867	0.245898	SBNO1
NM_001168.3	308.323	0.289101	0.12559	2.30194	0.0213387	0.0654837	4144.66	-0.185665	0.0777446	-2.38814	0.0169339	0.0305245	1252.51	0.468988	0.133168	3.52178	0.000428655	0.00362894	BIRC5
NM_001168241.2	39.5821	0.80926	0.293693	2.75546	0.00586088	0.0232259	1269.96	0.470759	0.0951381	4.94816	7.49179197537021e-07	3.5889280504569e-06	320.851	0.310411	0.235929	1.3157	0.188276	0.350142	GAREM2
NM_001168243.4	42.7182	0.192998	0.277389	0.695768	0.486574	0.636859	1320.12	-0.322866	0.144065	-2.24112	0.0250183	0.0431761	335.273	0.515109	0.283777	1.81519	0.0694945	0.175023	C4orf48
NM_001168368.2	59.8023	-0.348303	0.246303	-1.41412	0.157325	0.29432	503.126	0.0425244	0.119758	0.355087	0.722525	0.776721	177.813	-0.426663	0.233902	-1.82411	0.0681362	0.172685	GALNT16
NM_001168478.2	113.67	-0.841612	0.177356	-4.74532	2.08178764546601e-06	2.76033258085139e-05	220.685	-1.04959	0.171972	-6.10326	1.0392923076642e-09	7.95758252180618e-09	178.479	0.200679	0.219336	0.914938	0.360224	0.534231	ARMCX5
NM_001168618.2	58.1391	-0.176589	0.235585	-0.749576	0.45351	0.610941	392.922	-0.469718	0.117264	-4.00564	6.18490392176906e-05	0.000199924	151.952	0.292715	0.213727	1.36957	0.17082	0.327354	IFT46
NM_001170535.3	105.16	-0.137632	0.189635	-0.725775	0.467977	0.622076	1157.47	-0.02477	0.100873	-0.245556	0.806026	0.846298	371.744	-0.109706	0.190698	-0.575287	0.565097	0.712242	ATAD3A
NM_001170543.2	66.4464	0.282595	0.222304	1.27121	0.203653	0.354032	1398.38	-0.239983	0.0846337	-2.83555	0.00457468	0.00958499	379.424	0.511315	0.186942	2.73515	0.00623509	0.0291593	PGAM5
NM_001170629.2	760.433	0.029852	0.0930385	0.320856	0.748319	0.842196	1760.93	0.324495	0.0793743	4.08817	4.34798095000963e-05	0.000144938	1255.82	-0.302315	0.108412	-2.78858	0.00529391	0.0256689	CHD8
NM_001170795.4	242.602	-0.199567	0.146387	-1.36328	0.172793	0.315629	1233.86	-0.487013	0.100133	-4.86367	1.15230090845796e-06	5.33540645910729e-06	546.164	0.285912	0.172488	1.65757	0.0974034	0.223448	ATRAID
NM_001171136.2	119.653	1.06365	0.189453	5.61432	1.97332585170149e-08	4.01957896313978e-07	2475.75	1.06826	0.0963933	11.0823	1.52955872960992e-28	7.12132122343799e-27	674.536	-0.0134429	0.193467	-0.0694842	0.944604	0.967201	ZBED1
NM_001171155.2	125.314	0.186664	0.169431	1.10171	0.270589	0.430786	269.112	-0.484222	0.21256	-2.27805	0.0227236	0.0396381	202.337	0.672243	0.284424	2.36352	0.0181023	0.0653138	PET100
NM_001171251.3	46.1147	-0.0719736	0.269061	-0.267499	0.789085	0.871673	280.623	-0.250769	0.14068	-1.78254	0.0746605	0.113181	113.818	0.165953	0.256006	0.648239	0.51683	0.673905	HROB
NM_001171613.2	808.614	-0.466783	0.0873049	-5.34658	8.96297779158446e-08	1.60477264790726e-06	1805.89	-0.236951	0.0853328	-2.77679	0.00548986	0.0112837	1320.84	-0.238124	0.107777	-2.20941	0.0271459	0.0894816	PREPL
NM_001172173.2	55.4293	1.29943	0.254384	5.10813	3.25367545011403e-07	5.0717643384125e-06	422.241	0.396029	0.151911	2.60698	0.00913437	0.0176833	155.181	0.891334	0.272843	3.26683	0.00108758	0.00748844	CSRNP3
NM_001172303.3	504.179	0.513351	0.111535	4.60262	4.1720695745132e-06	5.13621353603939e-05	872.922	0.886255	0.111433	7.95324	1.81692824443094e-15	2.85657729772752e-14	768.742	-0.381101	0.15573	-2.44719	0.0143973	0.0552324	MASTL
NM_001172638.2	65.7348	-1.28669	0.241282	-5.33274	9.67421253399257e-08	1.70318651981543e-06	421.97	-1.37393	0.143148	-9.59795	8.15490067654497e-22	2.36970165521533e-20	166.923	0.0885591	0.255287	0.3469	0.728667	0.832198	ZFP62
NM_001172773.2	73.4927	-0.810177	0.226402	-3.57849	0.000345583	0.00231662	347.476	-0.635899	0.134942	-4.7124	2.44815118622938e-06	1.05852078226552e-05	159.769	-0.161132	0.231568	-0.695832	0.486534	0.649724	ZNF548
NM_001172774.2	356.916	-0.308634	0.111632	-2.76474	0.00569681	0.022693	2100.85	0.0292195	0.078148	0.373899	0.70848	0.765136	865.584	-0.34747	0.115675	-3.00384	0.00266594	0.0149761	DPY19L3
NM_001173464.2	493.088	0.0184829	0.102052	0.181112	0.856279	0.914978	1134.78	0.628917	0.106378	5.91208	3.37813810907583e-09	2.41046315369873e-08	812.827	-0.620049	0.141525	-4.38121	1.18021485484017e-05	0.000197866	KIF21A
NM_001173524.2	1386.34	-0.236038	0.0845662	-2.79116	0.00525201	0.0212607	1491.08	-0.146089	0.118966	-1.22798	0.219453	0.287879	1916.7	-0.0964578	0.154208	-0.625502	0.531641	0.68674	RO60
NM_001174072.3	69.9833	-0.361324	0.215796	-1.67438	0.094056	0.201877	300.875	-0.466683	0.144062	-3.23945	0.0011976	0.00290171	145.626	0.10507	0.226127	0.46465	0.642182	0.768571	SERINC5
NM_001174096.2	405.223	0.261589	0.105262	2.48513	0.0129505	0.0440014	1457.25	0.431589	0.0944193	4.57098	4.8545723096198e-06	1.98012976055983e-05	781.664	-0.177774	0.129606	-1.37165	0.170172	0.326779	ZEB1
NM_001174100.2	53.1646	0.830952	0.254473	3.26539	0.00109315	0.00608887	1312.59	-0.275039	0.0864008	-3.1833	0.00145609	0.00345356	345.58	1.1299	0.20859	5.41684	6.06619026907638e-08	2.45914020907942e-06	PCBP4
NM_001174150.2	71.6186	0.891009	0.221828	4.01667	5.90253451345573e-05	0.000515043	460.985	0.188927	0.126646	1.49177	0.13576	0.190579	182.221	0.681867	0.225096	3.02924	0.00245174	0.0141499	ARL13B
NM_001174156.2	177.983	-0.47396	0.165734	-2.85977	0.00423954	0.0180512	1132.16	0.371256	0.0990781	3.7471	0.00017889	0.000523076	450.017	-0.852146	0.180787	-4.71353	2.43457154843471e-06	5.35987135676279e-05	SAMD8
NM_001177.6	248.453	0.114833	0.130332	0.881078	0.378275	0.54132	985.291	-0.216184	0.0890867	-2.42667	0.015238	0.0278005	499.019	0.322936	0.135398	2.38509	0.0170748	0.0626524	ARL1
NM_001177306.2	2743.5	-0.417414	0.0811386	-5.14445	2.6830160526478e-07	4.29891764295164e-06	6730.2	0.170454	0.0779472	2.18679	0.0287581	0.0488106	4612.15	-0.596335	0.110028	-5.41986	5.96451645108985e-08	2.4353286104163e-06	PAM
NM_001177382.2	57.1995	0.453388	0.237742	1.90706	0.0565126	0.137222	590.38	0.519682	0.124775	4.16494	3.11435374448633e-05	0.000107034	193.741	-0.0776149	0.232969	-0.333156	0.739016	0.838341	CPEB2
NM_001177479.2	59.563	0.255864	0.233838	1.09419	0.273871	0.434535	166.838	0.144512	0.194015	0.744849	0.456363	0.53369	104.626	0.105368	0.276903	0.380523	0.703557	0.814107	HDX
NM_001177701.3	69.9875	0.118272	0.220767	0.535731	0.592144	0.725546	396.465	-0.2845	0.137112	-2.07495	0.0379916	0.0624458	166.353	0.388539	0.232298	1.67259	0.0944086	0.218456	IFT27
NM_001178139.2	313.207	0.385504	0.120815	3.19085	0.00141853	0.00757471	2171.63	0.607422	0.115388	5.26418	1.40817785944818e-07	7.65594504617408e-07	830.9	-0.233421	0.174224	-1.33978	0.180318	0.340296	TFDP2
NM_001182.5	794.5	-0.012997	0.0887754	-0.146403	0.883603	0.935052	2416.15	-0.137204	0.0781577	-1.75547	0.0791786	0.118958	1436.8	0.113599	0.10409	1.09135	0.275118	0.451409	ALDH7A1
NM_001183.6	589.876	0.20716	0.0995287	2.08141	0.0373967	0.100788	3170.55	-0.0843894	0.074094	-1.13895	0.254724	0.327569	1364.99	0.289215	0.108621	2.66261	0.00775377	0.0345194	ATP6AP1
NM_001184.4	321.43	-0.036482	0.117719	-0.309906	0.756632	0.848156	405.088	-0.440167	0.130545	-3.37178	0.000746847	0.00189284	457.199	0.394175	0.155473	2.53532	0.0112344	0.0457118	ATR
NM_001184742.2	283.633	0.159224	0.126017	1.26351	0.206405	0.357122	775.23	0.519309	0.0970226	5.35245	8.67699755310239e-08	4.87798921814502e-07	494.057	-0.372543	0.140053	-2.66002	0.00781368	0.0347678	ZBTB33
NM_001184785.2	421.889	-0.18397	0.128151	-1.43557	0.151125	0.285749	1401.04	0.539012	0.101961	5.28645	1.24714652675927e-07	6.83335746488968e-07	788.594	-0.732136	0.168723	-4.33927	1.42954874913235e-05	0.000231736	PARD3
NM_001184819.2	254.498	0.147508	0.130452	1.13075	0.258159	0.416662	1154.58	0.224764	0.265837	0.845494	0.397835	0.476486	542.86	-0.0850134	0.234012	-0.363287	0.716391	0.823195	GNL3L
NM_001184880.2	59.6702	0.443646	0.236633	1.87483	0.0608167	0.145001	555.314	0.836481	0.147768	5.66076	1.50704349873442e-08	9.64301865135531e-08	189.03	-0.402391	0.261264	-1.54017	0.123519	0.263976	PCDH19
NM_001184900.3	48.2408	-0.456373	0.265187	-1.72095	0.0852606	0.188171	500.085	0.0697246	0.132822	0.524947	0.59962	0.669094	163.864	-0.522487	0.258147	-2.02399	0.0429715	0.125549	CARD8
NM_001184940.2	69.9756	0.440547	0.220593	1.9971	0.0458145	0.117183	1991.19	0.0514178	0.0907149	0.566807	0.570846	0.642001	512.051	0.383042	0.193083	1.98382	0.0472759	0.134355	FAM219A
NM_001184970.3	208.623	0.313442	0.13523	2.31784	0.0204579	0.0633337	1889.23	-0.186201	0.0776181	-2.39894	0.0164425	0.0297341	649.226	0.49869	0.130636	3.81741	0.000134858	0.00141433	PACSIN2
NM_001184989.2	259.362	-0.10536	0.133003	-0.792161	0.428267	0.588159	907.515	-0.380703	0.117712	-3.23418	0.00121994	0.00295075	494.766	0.267108	0.17708	1.5084	0.131451	0.275173	NDUFC1
NM_001185072.3	89.0988	0.184902	0.201146	0.919243	0.357968	0.523089	685.457	-0.371051	0.104862	-3.53848	0.000402438	0.00108315	250.959	0.554574	0.19535	2.83888	0.00452717	0.0227628	CLDN12
NM_001185181.3	111.552	-0.380702	0.181833	-2.09369	0.0362877	0.0986535	486.314	-0.716015	0.162541	-4.40514	1.0571793290032e-05	4.02750913449816e-05	233.576	0.329152	0.247953	1.32748	0.18435	0.345336	PFDN6
NM_001186.4	316.123	0.232021	0.121165	1.91492	0.0555031	0.135221	1400.52	0.542636	0.107179	5.06288	4.12965189251373e-07	2.0714628867984e-06	666.978	-0.319302	0.15905	-2.00756	0.0446899	0.129138	BACH1
NM_001190.4	74.8798	-0.269156	0.209865	-1.28252	0.199661	0.348961	702.114	-0.846521	0.10776	-7.85558	3.97928100805936e-15	6.06898954969196e-14	238.153	0.571506	0.198732	2.87576	0.00403055	0.0207425	BCAT2
NM_001190274.2	779.259	0.0446273	0.0974931	0.457748	0.647133	0.768068	1775.55	0.6004	0.0859755	6.98339	2.88145216600468e-12	3.10909057655844e-11	1280.7	-0.566083	0.123503	-4.58357	4.5709516005709e-06	9.17672949905092e-05	FBXO11
NM_001190467.2	57.4891	0.0838405	0.274452	0.305483	0.759998	0.850695	721.72	-0.343662	0.10886	-3.15692	0.00159447	0.0037407	222.498	0.474884	0.260013	1.82639	0.0677919	0.172123	PRR36
NM_001190737.2	129.496	0.0192674	0.165758	0.116238	0.907464	0.949577	970.38	-0.181081	0.0930156	-1.94678	0.0515607	0.0819042	359.127	0.187167	0.159518	1.17333	0.240663	0.412705	NFIB
NM_001190850.2	102.965	0.614566	0.18995	3.23542	0.00121465	0.00666005	286.249	0.416554	0.15656	2.66067	0.00779849	0.0153332	180.366	0.195412	0.228773	0.854176	0.393008	0.566468	CNOT4
NM_001190946.3	49.6748	0.442832	0.251051	1.76391	0.0777466	0.17507	604.891	0.162865	0.105177	1.54849	0.121505	0.173252	188.198	0.287013	0.217747	1.31811	0.187468	0.349179	FAM193B
NM_001191057.4	127.083	-0.155598	0.164972	-0.943179	0.345589	0.509681	213.627	0.592177	0.157531	3.75911	0.000170519	0.000501384	192.379	-0.75797	0.193397	-3.91924	8.88290652623119e-05	0.00102604	PDE1C
NM_001191061.2	58.3585	0.540708	0.237193	2.27961	0.0226308	0.0686495	1422.4	-0.289662	0.0896364	-3.23152	0.00123135	0.00297408	375.34	0.812135	0.201301	4.03444	5.47337562177322e-05	0.000700326	SLC25A22
NM_001193315.2	98.9433	-0.443449	0.193577	-2.29082	0.021974	0.0671863	379.38	-0.813521	0.14137	-5.75457	8.68625499419186e-09	5.80024333090767e-08	195.959	0.361759	0.224181	1.61369	0.106594	0.23803	VIPAS39
NM_001193360.2	115.663	0.193286	0.17834	1.08381	0.278448	0.439294	678.912	-0.175403	0.104331	-1.68122	0.0927201	0.136791	280.04	0.377787	0.178303	2.11879	0.0341081	0.106361	EXD2
NM_001193369.2	382.782	0.788801	0.118974	6.63	3.35685600618918e-11	1.13688219679491e-09	2036.31	0.754933	0.0802276	9.40989	4.96636360201217e-21	1.33711009821586e-19	881.455	0.0238105	0.130291	0.182749	0.854995	0.913729	DIDO1
NM_001193424.2	175.529	0.0136676	0.149982	0.0911282	0.927391	0.961276	942.965	0.0734142	0.0968409	0.75809	0.448397	0.526609	406.125	-0.0785561	0.157223	-0.499649	0.617322	0.751944	SUV39H2
NM_001193489.2	249.223	0.0708399	0.128145	0.552812	0.580392	0.715876	1130.93	0.0717955	0.091601	0.783785	0.433166	0.51189	531.495	-0.01184	0.136417	-0.0867927	0.930836	0.959747	SECISBP2L
NM_001193511.2	43.46	0.363731	0.275856	1.31855	0.187318	0.334107	386.301	-0.324884	0.131983	-2.46156	0.0138333	0.0256033	133.661	0.671077	0.258104	2.60002	0.00932173	0.0399215	MAP3K12
NM_001193552.2	211.843	-1.50394	0.153478	-9.79903	1.13675094665808e-22	1.33141954627328e-20	312.891	-1.21134	0.149721	-8.09062	5.93602773263033e-16	1.01260942718372e-14	311.349	-0.298693	0.201113	-1.4852	0.137491	0.283177	ZNF850
NM_001194998.2	109.108	0.0694689	0.175489	0.395858	0.69221	0.800412	303.424	0.351576	0.127776	2.7515	0.00593239	0.0120667	191.19	-0.288786	0.180459	-1.60028	0.109536	0.242672	CEP152
NM_001195248.2	94.2963	-0.260457	0.199757	-1.30387	0.192278	0.340004	620.346	-0.698893	0.114709	-6.09273	1.11000380013524e-09	8.46516020247937e-09	242.802	0.412734	0.206585	1.99789	0.0457285	0.131061	APTX
NM_001195305.3	51.7642	-0.0729136	0.257559	-0.283095	0.777104	0.862733	374.655	-0.125434	0.126789	-0.989309	0.322512	0.399267	140.714	0.0526402	0.240749	0.218652	0.826921	0.895432	BBIP1
NM_001195427.2	516.067	0.629336	0.107135	5.87425	4.24773130479987e-09	9.84011105692925e-08	11596.3	0.239775	0.0641169	3.73965	0.000184279	0.000537341	3107.16	0.374707	0.111452	3.36204	0.000773695	0.00574784	SRSF2
NM_001195518.2	309.338	-0.295272	0.119173	-2.47766	0.0132246	0.0447523	1120.31	-0.136444	0.0876416	-1.55684	0.119509	0.170667	598.344	-0.161993	0.12761	-1.26945	0.204282	0.369875	MICU1
NM_001195553.2	143.598	-0.0846691	0.15956	-0.530643	0.595666	0.727481	1129.36	0.0458195	0.12983	0.35292	0.724148	0.777673	409.849	-0.139391	0.205377	-0.678711	0.497321	0.658749	DCX
NM_001195626.3	113.818	0.0110428	0.186182	0.0593121	0.952704	0.974309	1075.06	0.0658265	0.0847086	0.777093	0.437104	0.515893	363.869	-0.048773	0.169549	-0.287663	0.773604	0.861923	MLLT10
NM_001197026.2	77.3423	-0.34053	0.229061	-1.48664	0.137111	0.26648	1119.15	0.485234	0.0988675	4.90793	9.20447305029037e-07	4.32605099803664e-06	331.535	-0.872916	0.209226	-4.17213	3.0176755030719e-05	0.000428368	PLEKHA8
NM_001197104.2	599.814	0.371704	0.0972581	3.82183	0.000132463	0.00102295	2212.07	0.807508	0.100718	8.0175	1.07915480299618e-15	1.75900145548333e-14	1169.01	-0.443506	0.1386	-3.1999	0.00137476	0.00901396	KMT2A
NM_001197293.3	2668	0.0829925	0.0799427	1.03815	0.299201	0.461948	6881.22	-0.616573	0.0749793	-8.22324	1.98070413951596e-16	3.5139776386739e-15	4557.59	0.690681	0.10846	6.36809	1.91396639972795e-10	1.52250610212321e-08	DPYSL2
NM_001197294.2	1966.35	0.00916332	0.093791	0.0976993	0.922171	0.95884	13681.1	0.0551741	0.0959549	0.575	0.565291	0.637371	5225.44	-0.0527424	0.147329	-0.357991	0.72035	0.826506	DPYSL3
NM_001198533.2	125.788	0.152043	0.167121	0.909779	0.362939	0.527792	393.561	0.0622668	0.13769	0.452223	0.651108	0.714625	229.872	0.077893	0.197253	0.394888	0.692926	0.805742	OXR1
NM_001198800.3	216.751	-0.168937	0.141481	-1.19407	0.232453	0.388322	575.27	-0.325643	0.109497	-2.974	0.0029395	0.00647612	373.802	0.146197	0.158853	0.920326	0.357402	0.531971	ASCC1
NM_001198934.2	38.3189	0.0421073	0.287904	0.146255	0.88372	0.935058	353.309	-0.132169	0.143246	-0.922675	0.356176	0.434182	120.608	0.191305	0.275215	0.695111	0.486986	0.649931	ABCC10
NM_001198950.3	56.2284	0.193732	0.240865	0.804316	0.421215	0.58174	227.473	0.53646	0.149077	3.59855	0.000319999	0.000881226	113.958	-0.348132	0.239211	-1.45534	0.145576	0.293449	MYO16
NM_001198956.2	120.628	-0.0257862	0.171888	-0.150017	0.880751	0.932736	512.74	0.649286	0.127373	5.09752	3.44131549803324e-07	1.7469858856582e-06	249.81	-0.680847	0.195096	-3.48981	0.000483357	0.00395312	DCAF6
NM_001199.4	59.4491	-0.240728	0.241718	-0.995905	0.319296	0.484372	38.4565	0.188909	0.353682	0.534121	0.593258	0.663048	76.6725	-0.435688	0.343748	-1.26747	0.204989	0.370756	BMP1
NM_001199135.3	84.4674	0.636513	0.198713	3.20317	0.00135923	0.00732419	347.617	0.730288	0.141403	5.16458	2.40979696482257e-07	1.2644681832229e-06	172.468	-0.108182	0.218209	-0.49577	0.620057	0.75303	TANK
NM_001199140.2	88.2305	1.32918	0.198905	6.6825	2.3490342581373e-11	8.18570491688918e-10	1478.28	1.03404	0.0943139	10.9638	5.70341108028944e-28	2.55652367944676e-26	422.01	0.280961	0.184436	1.52335	0.127671	0.270034	AMMECR1L
NM_001199161.2	146.393	0.125744	0.156007	0.806018	0.420232	0.580859	747.473	-0.243226	0.102829	-2.36534	0.0180133	0.0322357	330.201	0.355517	0.160943	2.20896	0.0271778	0.0895517	USP19
NM_001199165.4	169.257	-0.315721	0.155592	-2.02915	0.0424428	0.11088	399.692	0.221766	0.122134	1.81576	0.0694069	0.106093	281.181	-0.539962	0.172336	-3.1332	0.00172913	0.010784	CEP112
NM_001199196.2	140.958	0.262072	0.160334	1.63454	0.102146	0.214705	1167.18	0.092258	0.0979811	0.94159	0.346402	0.4238	415.011	0.159243	0.166665	0.955468	0.339341	0.516946	ARMC6
NM_001199198.3	245.153	-0.294252	0.126645	-2.32345	0.0201551	0.0625572	551.498	-0.12007	0.121502	-0.988214	0.323048	0.399871	401.286	-0.182072	0.158043	-1.15204	0.249304	0.423219	TBC1D23
NM_001199251.3	179.845	0.279528	0.141819	1.97101	0.0487226	0.122738	297.707	0.511893	0.132677	3.85817	0.000114237	0.00035083	271.256	-0.239744	0.162302	-1.47714	0.139638	0.286178	SGO1
NM_001199260.2	100.914	0.250201	0.192671	1.2986	0.194083	0.342191	666.112	0.337961	0.125764	2.68727	0.0072039	0.014311	260.389	-0.0845833	0.216056	-0.391488	0.695436	0.807702	TOR1AIP2
NM_001199261.3	304.618	-0.365061	0.1221	-2.98986	0.00279108	0.0130689	814.229	-0.224655	0.0987319	-2.27541	0.0228814	0.039872	526.561	-0.143521	0.138621	-1.03535	0.300508	0.478813	UCHL5
NM_001199298.2	80.7097	0.104393	0.20155	0.517949	0.604494	0.733159	458.969	0.203835	0.111472	1.82858	0.0674626	0.103686	192.262	-0.105776	0.190304	-0.555824	0.578331	0.722335	UIMC1
NM_001199383.2	540.389	0.175394	0.103837	1.68913	0.0911939	0.197777	3244.78	0.574559	0.080026	7.17965	6.98914532944319e-13	8.15755231180301e-12	1324.62	-0.405259	0.121257	-3.34216	0.000831283	0.00606872	RNF145
NM_001199397.3	125.062	-0.221299	0.171929	-1.28716	0.19804	0.347291	405.124	0.247063	0.13194	1.87254	0.0611319	0.0951348	231.583	-0.474435	0.196459	-2.41494	0.0157379	0.0592157	NEK1
NM_001199417.2	90.0415	-0.0508133	0.19983	-0.254283	0.799277	0.878895	1782.52	-0.214495	0.12217	-1.75571	0.0791379	0.118919	489.8	0.165893	0.220883	0.751044	0.452626	0.622195	ARHGAP23
NM_001199753.2	87.4569	0.0414638	0.211297	0.196234	0.844427	0.908645	858.874	-0.353294	0.109566	-3.2245	0.00126191	0.00303919	286.621	0.412968	0.212666	1.94186	0.0521543	0.143118	CPT1C
NM_001199867.2	46.8774	0.26811	0.275677	0.972548	0.330778	0.495286	1073.15	0.468701	0.0913883	5.12867	2.91789217410617e-07	1.50483949517703e-06	286.589	-0.178986	0.224268	-0.798093	0.424816	0.595914	MARK4
NM_001201338.2	685.006	0.756938	0.110272	6.86428	6.6827723636845e-12	2.59704236603463e-10	2896.22	0.672411	0.0855701	7.85802	3.90258486384515e-15	5.96861754040346e-14	1415.28	0.0755609	0.143535	0.526428	0.598591	0.73802	SAFB
NM_001201380.3	48.6864	-0.652627	0.269009	-2.42604	0.0152646	0.0502444	169.236	-0.108838	0.237481	-0.458301	0.646736	0.710845	92.664	-0.556594	0.361836	-1.53825	0.123988	0.264675	CNTNAP3B
NM_001201543.2	110.163	-0.541912	0.186308	-2.90869	0.0036295	0.0160418	364.883	-0.131192	0.127165	-1.03167	0.302225	0.378096	205.708	-0.427186	0.19772	-2.16056	0.030729	0.0978131	FAM161A
NM_001202438.2	249.866	0.469275	0.128194	3.66065	0.00025158	0.00178434	612.469	0.518064	0.123035	4.2107	2.5458429814113e-05	8.92421747269262e-05	419.883	-0.0561372	0.165265	-0.33968	0.734097	0.835862	EDRF1
NM_001202439.3	53.2373	-0.182824	0.24657	-0.741468	0.45841	0.614981	500.301	1.87596	0.14855	12.6285	1.4704827365386e-36	1.05014898481447e-34	169.767	-2.06912	0.260669	-7.93773	2.05911043495617e-15	5.10659387869131e-13	NCR3LG1
NM_001203.3	134.545	0.198665	0.160493	1.23784	0.215774	0.36842	554.495	0.321982	0.137401	2.34337	0.0191102	0.0339536	274.861	-0.132278	0.20277	-0.652352	0.514174	0.671812	BMPR1B
NM_001204.7	321.115	1.43255	0.120599	11.8786	1.5285156046493e-32	2.92953911227445e-30	3497.6	2.66409	0.119175	22.3545	1.0905612380355e-110	5.10564419606952e-108	1128.23	-1.23661	0.17801	-6.94685	3.73536562894701e-12	4.96486481541298e-10	BMPR2
NM_001204077.2	421.045	-0.348314	0.112001	-3.10993	0.0018713	0.00945515	815.456	0.0674772	0.103878	0.649584	0.515961	0.59028	660.657	-0.422881	0.139671	-3.02768	0.00246435	0.0142033	UBE4A
NM_001205.3	58.1557	0.0350091	0.240464	0.14559	0.884245	0.935379	244.548	-0.283275	0.146701	-1.93097	0.0534864	0.0845172	119.835	0.334744	0.241202	1.38782	0.165193	0.319583	BNIP1
NM_001205019.2	62.2062	-0.161667	0.230642	-0.700944	0.483338	0.634001	171.4	0.141831	0.212274	0.668152	0.504037	0.578444	108.643	-0.312364	0.298254	-1.04731	0.294957	0.472806	GK
NM_001206427.2	527.196	-0.355904	0.109262	-3.25734	0.00112462	0.00624351	874.031	0.0451038	0.120302	0.374923	0.707718	0.764509	795.417	-0.409529	0.164348	-2.49184	0.0127085	0.0503325	ATP5MK
NM_001206641.3	101.016	-0.410039	0.190207	-2.15575	0.0311032	0.0881658	368.938	-0.131632	0.129219	-1.01868	0.308357	0.384795	196.115	-0.283614	0.203581	-1.39313	0.163582	0.317669	COA6
NM_001206998.2	70.8987	0.85598	0.22196	3.85645	0.000115044	0.000907542	1242.82	0.906053	0.10182	8.89857	5.65729495656319e-19	1.29901974384082e-17	350.968	-0.0417357	0.204001	-0.204586	0.837896	0.901626	ZNRF3
NM_001206999.2	411.201	0.124061	0.109861	1.12926	0.258789	0.417359	1037.67	0.344957	0.0947714	3.63988	0.000272765	0.000763906	697.628	-0.22866	0.131947	-1.73297	0.0831016	0.19923	CIT
NM_001207067.2	2861.8	-0.432437	0.080277	-5.38681	7.17190411763196e-08	1.30910535549763e-06	10461.3	-0.0175695	0.0673733	-0.260778	0.794264	0.836344	5557.3	-0.424281	0.100689	-4.21379	2.51119500643589e-05	0.000367611	BZW1
NM_001211.6	968.176	0.284643	0.083012	3.42894	0.000605953	0.00370828	1537.58	0.655518	0.0836212	7.83914	4.53642546310198e-15	6.88801033829917e-14	1446.11	-0.381446	0.100032	-3.81322	0.000137166	0.00143142	BUB1B
NM_001212.4	919.315	0.0234712	0.0875773	0.268006	0.788695	0.871585	3776.37	-0.12929	0.0860299	-1.50285	0.132877	0.187125	1875.05	0.144003	0.119086	1.20924	0.226571	0.398325	C1QBP
NM_001214909.2	324.839	2.12211	0.121477	17.4691	2.46202115777868e-68	1.38414829490317e-65	3504.22	2.19891	0.0724796	30.3384	3.57550163480955e-202	4.30439318236287e-199	1133.78	-0.0848939	0.119484	-0.710506	0.47739	0.642617	ZNF48
NM_001218.5	72.4875	-0.18612	0.248515	-0.748931	0.453899	0.611154	840.026	-0.637085	0.14444	-4.41073	1.03020752346975e-05	3.93008546866436e-05	265.3	0.461749	0.284831	1.62113	0.104989	0.235383	CA12
NM_001219.5	1744.25	-0.106101	0.0793793	-1.33663	0.181343	0.326139	8088.62	-0.0429501	0.0600955	-0.714697	0.474796	0.550889	3757.76	-0.0750558	0.0831138	-0.903049	0.3665	0.540456	CALU
NM_001226.4	166.619	-0.571501	0.153732	-3.71752	0.000201186	0.00146638	425.832	-0.321103	0.118221	-2.71613	0.00660498	0.0132619	283.825	-0.261971	0.167362	-1.5653	0.117513	0.254005	CASP6
NM_001227.5	44.2836	-0.36336	0.278928	-1.3027	0.192676	0.340351	319.483	-0.576674	0.134252	-4.29545	1.74341432698121e-05	6.349071967792e-05	120.104	0.192276	0.258927	0.742589	0.457731	0.627065	CASP7
NM_001229.5	41.517	-0.103068	0.276527	-0.372722	0.709356	0.814875	302.197	-0.513397	0.130882	-3.9226	8.75993490732265e-05	0.00027361	113.198	0.378702	0.250246	1.51332	0.130199	0.273502	CASP9
NM_001235.5	2285.6	-0.17319	0.0827617	-2.09263	0.0363818	0.0988108	12322.7	-0.451148	0.0829132	-5.4412	5.29222092074344e-08	3.10250164725725e-07	5297.45	0.268765	0.12104	2.22045	0.0263879	0.0874267	SERPINH1
NM_001237.5	876.38	0.243676	0.0960078	2.53808	0.0111462	0.0389862	2288.77	0.322713	0.0846693	3.81146	0.000138151	0.000416677	1503.45	-0.0867804	0.12426	-0.698375	0.484943	0.648539	CCNA2
NM_001238.4	106.323	-0.519559	0.182222	-2.85123	0.00435498	0.0184273	541.357	-0.277345	0.113619	-2.44101	0.0146463	0.0268606	239.539	-0.246942	0.186695	-1.32271	0.185933	0.347163	CCNE1
NM_001239.4	169.25	0.105531	0.148927	0.708608	0.478568	0.630194	347.302	0.17159	0.125306	1.36937	0.170884	0.232302	269.805	-0.0821568	0.165076	-0.49769	0.618702	0.752256	CCNH
NM_001240.4	214.347	0.108731	0.136787	0.79489	0.426677	0.586977	1156.23	0.19636	0.106301	1.84721	0.0647163	0.0999384	496.943	-0.0936366	0.162504	-0.576212	0.564472	0.711773	CCNT1
NM_001242318.3	91.4006	0.741671	0.192593	3.85098	0.000117646	0.000923748	1083.95	0.444432	0.095883	4.63514	3.56687866860984e-06	1.48655225224407e-05	340.034	0.296648	0.179906	1.64891	0.0991667	0.225993	PDE7A
NM_001242481.2	67.5588	0.463604	0.215829	2.14802	0.031712	0.0893881	633.57	0.276021	0.120712	2.28661	0.0222189	0.0388703	214.997	0.174695	0.215978	0.808853	0.4186	0.590536	EIF1AD
NM_001242532.5	113.455	-0.285315	0.19928	-1.43173	0.152221	0.287305	298.974	0.201574	0.137336	1.46775	0.142172	0.198333	195.224	-0.490597	0.224085	-2.18934	0.0285724	0.0928411	MFSD11
NM_001242809.2	42.3077	-0.0228012	0.271551	-0.0839664	0.933083	0.963592	1242.34	0.366228	0.100925	3.62873	0.000284824	0.000793722	317.987	-0.383111	0.231329	-1.65613	0.0976955	0.223607	ANKRD6
NM_001242818.2	45.4227	0.493919	0.267131	1.84898	0.0644611	0.151449	885.509	-0.0288657	0.0991845	-0.29103	0.771028	0.818628	244.093	0.489859	0.224212	2.1848	0.0289034	0.0936683	DEF8
NM_001242835.2	137.099	0.438598	0.162398	2.70075	0.0069183	0.026588	1679.14	-0.0950543	0.0767678	-1.23821	0.21564	0.283671	521.491	0.532301	0.144456	3.68486	0.000228829	0.0022001	NDRG4
NM_001242850.2	147.097	-0.0254537	0.166443	-0.152927	0.878456	0.931987	884.494	-0.539699	0.106095	-5.08692	3.63933957982981e-07	1.84085922204236e-06	360.668	0.509819	0.180781	2.8201	0.00480094	0.0237707	RNF146
NM_001242868.2	198.254	0.148875	0.141864	1.04942	0.293984	0.45598	1202.8	0.431484	0.0847926	5.0887	3.60517698454277e-07	1.8257708202369e-06	488.632	-0.275795	0.140042	-1.96937	0.0489105	0.137425	SLAIN1
NM_001242896.3	62.8911	0.0572	0.23186	0.246701	0.80514	0.882243	314.896	0.0343595	0.136226	0.252225	0.800867	0.842561	140.551	0.00675923	0.230477	0.0293271	0.976604	0.986076	DEPDC5
NM_001242898.2	65.2074	-0.488651	0.230873	-2.11654	0.0342992	0.0947104	1151.9	-0.105254	0.0876661	-1.20062	0.229898	0.299338	324.622	-0.371868	0.194461	-1.9123	0.0558377	0.150279	PPP6R2
NM_001243177.4	1942.89	0.206931	0.0813324	2.54427	0.0109507	0.03843	13622.2	-0.252522	0.0783604	-3.22257	0.00127046	0.00305716	5185.31	0.450755	0.113319	3.97776	6.95670216531297e-05	0.000848899	ALDOA
NM_001243332.2	179.006	-0.277958	0.145628	-1.90869	0.0563024	0.13679	1069.75	-0.316699	0.0861366	-3.6767	0.000236268	0.000673329	437.591	0.031365	0.142651	0.219872	0.825971	0.894961	SEZ6L2
NM_001243351.2	287.266	-0.327329	0.124277	-2.63388	0.00844154	0.0312775	645.516	-0.107298	0.10307	-1.04102	0.297868	0.373476	470.097	-0.22276	0.141412	-1.57525	0.115198	0.250633	NUB1
NM_001243439.2	242.399	0.426877	0.131642	3.2427	0.00118404	0.00650911	1110.59	0.377561	0.0897752	4.20563	2.60354879861244e-05	9.1000023749096e-05	519.363	0.0345139	0.140802	0.245123	0.806361	0.882895	SPECC1
NM_001243925.2	39.0977	0.109722	0.288568	0.38023	0.703775	0.810119	1021.69	-0.316479	0.0861582	-3.67323	0.0002395	0.000680697	266.333	0.39741	0.226401	1.75534	0.0792011	0.192235	MAPKAPK3
NM_001244008.2	536.069	0.284344	0.104464	2.72195	0.00648988	0.0252324	4871.95	0.516214	0.0688423	7.4985	6.45541504733502e-14	8.63488612760193e-13	1672.65	-0.237147	0.11462	-2.06898	0.0385479	0.116043	KIF1A
NM_001244710.2	390.564	0.316689	0.106477	2.97424	0.00293714	0.0135426	959.182	0.757037	0.107361	7.05133	1.77212630973099e-12	1.96237955480986e-11	656.889	-0.449304	0.14118	-3.18248	0.00146017	0.0094855	GFPT1
NM_001244926.2	280.862	-0.356609	0.121165	-2.94317	0.00324874	0.0146978	1424.91	-0.24793	0.0839523	-2.95322	0.00314478	0.00687446	631.601	-0.118589	0.124585	-0.951868	0.341164	0.51851	PRPF4
NM_001244949.2	167.37	-0.546303	0.149439	-3.6557	0.000256477	0.00181297	600.211	-0.745293	0.107325	-6.94428	3.80383510630974e-12	4.00186247701276e-11	322.392	0.18924	0.157668	1.20024	0.230044	0.401435	GPAM
NM_001247.5	102.296	0.0607871	0.180923	0.335983	0.736884	0.833441	1583.88	-0.216197	0.0837279	-2.58214	0.0098191	0.0188229	460.816	0.276106	0.161346	1.71127	0.0870313	0.205906	ENTPD6
NM_001247997.2	233.76	-0.0369489	0.127969	-0.288733	0.772786	0.859296	1548.19	0.301338	0.0849411	3.54761	0.000388743	0.00105099	604.27	-0.349235	0.13037	-2.67881	0.00738841	0.0333507	CLIP1
NM_001251845.2	62.8735	-0.0764063	0.237332	-0.321938	0.747499	0.841386	377.419	-0.474862	0.123087	-3.85793	0.00011435	0.00035092	154.03	0.380517	0.226284	1.6816	0.0926472	0.215488	TRPC1
NM_001252078.2	388.277	0.163735	0.110236	1.48531	0.137461	0.267036	619.924	0.358174	0.119427	2.9991	0.00270781	0.00601125	580.628	-0.203751	0.149584	-1.36212	0.17316	0.330187	USP15
NM_001253.4	803.318	0.117224	0.0868166	1.35025	0.176935	0.320466	1434.74	0.328313	0.0940297	3.49159	0.000480152	0.00127253	1234.4	-0.219567	0.118175	-1.85797	0.0631727	0.16395	CDC5L
NM_001253697.2	1448.79	0.160338	0.101805	1.57495	0.115269	0.233439	4322.21	0.753221	0.119014	6.32886	2.46977720151302e-10	2.0668135528451e-09	2602.63	-0.597251	0.179911	-3.3197	0.000901141	0.00645159	ERBIN
NM_001253852.3	81.5461	-0.085707	0.214113	-0.400289	0.688944	0.79762	352.573	-1.17734	0.143239	-8.2194	2.04516167235511e-16	3.62070954053288e-15	170.062	1.07926	0.235604	4.58081	4.63177898755618e-06	9.23289844517109e-05	AP4B1
NM_001253875.2	274.977	-0.289275	0.136924	-2.11266	0.0346296	0.0951552	1321.42	-0.344508	0.117579	-2.93002	0.00338943	0.00734827	602.342	0.0454333	0.186528	0.243574	0.807561	0.883299	UXS1
NM_001254.4	483.097	0.284354	0.0994773	2.85849	0.00425668	0.0181022	1705.51	0.248788	0.0807445	3.08118	0.0020618	0.0047048	924.908	0.0286917	0.108949	0.26335	0.792281	0.874459	CDC6
NM_001255.3	721.216	0.2398	0.0977713	2.45266	0.0141803	0.0474346	2613.45	0.0427658	0.0769312	0.555897	0.578281	0.649184	1395.44	0.190449	0.116804	1.6305	0.102997	0.231824	CDC20
NM_001256.6	583.065	0.433273	0.0963964	4.4947	6.96692099652135e-06	7.95020903432538e-05	1737.65	0.733709	0.0964175	7.60971	2.7472000187828e-14	3.82024002611924e-13	1046.89	-0.309376	0.129937	-2.38098	0.0172667	0.0631364	CDC27
NM_001256007.3	179.141	-0.0731403	0.156229	-0.468162	0.639669	0.761481	527.043	0.319033	0.114102	2.79604	0.00517327	0.0107166	320.174	-0.40478	0.177252	-2.28364	0.0223928	0.0771306	PNPLA8
NM_001256012.3	6997.42	-0.265782	0.0729066	-3.64551	0.000266859	0.00186912	15189.3	-0.137843	0.063523	-2.16996	0.0300095	0.0506997	11336	-0.136852	0.0908994	-1.50554	0.132186	0.275923	MYH10
NM_001256071.3	414.267	-0.289092	0.110976	-2.60498	0.0091879	0.033377	1054.66	0.60868	0.104044	5.85023	4.90902095294363e-09	3.40479996464658e-08	704.9	-0.9073	0.143812	-6.30893	2.80967996402494e-10	2.17350655565672e-08	RNF213
NM_001256141.2	47.9214	-0.586603	0.271544	-2.16025	0.0307536	0.0873215	379.155	-0.80288	0.131101	-6.12414	9.11766248938532e-10	7.0490405319312e-09	137.237	0.206841	0.257432	0.80348	0.421698	0.593318	FSBP
NM_001256155.3	132.558	0.218917	0.168079	1.30246	0.192758	0.340424	647.799	0.210881	0.118248	1.78337	0.0745256	0.113036	292.817	-0.00330945	0.191166	-0.0173119	0.986188	0.991256	ARMCX4
NM_001256378.2	877.679	-0.108794	0.0840489	-1.29442	0.195522	0.344003	2346.79	0.225578	0.0800202	2.81901	0.0048172	0.0100382	1517.47	-0.341719	0.0997919	-3.42431	0.000616359	0.00479441	MCMBP
NM_001256409.2	231.404	0.240084	0.133237	1.80194	0.0715552	0.164242	740.253	-0.243235	0.104747	-2.32211	0.0202272	0.0357348	426.363	0.476212	0.152037	3.13221	0.00173496	0.0108124	LRRC42
NM_001256447.2	410.874	0.239686	0.110177	2.17547	0.0295951	0.0846019	2596.47	-0.143765	0.0853677	-1.68407	0.0921685	0.136097	1034.87	0.376802	0.12911	2.91846	0.00351768	0.0185963	BCAP31
NM_001256470.2	360.151	0.103891	0.113834	0.91265	0.361426	0.526639	1026.45	0.578996	0.0968555	5.97794	2.25981180765538e-09	1.65739200201148e-08	636.536	-0.481945	0.136043	-3.5426	0.000396198	0.00341939	PLEKHA5
NM_001256545.2	510.329	0.23728	0.101142	2.34602	0.0189752	0.0595247	1471.15	0.00697048	0.0989365	0.0704541	0.943832	0.957697	905.389	0.221334	0.135522	1.6332	0.102427	0.230927	MEGF10
NM_001256660.2	107.74	-0.0880292	0.17956	-0.49025	0.623957	0.748908	2158.29	-0.0793	0.0789774	-1.00408	0.315338	0.391824	591.616	-0.0159595	0.157901	-0.101073	0.919493	0.953297	TEAD2
NM_001256686.2	561.458	0.0980597	0.108434	0.904326	0.365823	0.530324	37.9679	3.38447	2.14016	1.58141	0.113785	0.163489	653.502	-3.32078	1.62274	-2.0464	0.0407174	0.120766	CSNK2A3
NM_001256706.2	84.9341	-0.319431	0.203411	-1.57037	0.116328	0.235026	136.095	-0.511723	0.203635	-2.51294	0.011973	0.0224914	127.091	0.189492	0.253748	0.746771	0.455202	0.624412	ANAPC10
NM_001256798.2	45.0491	0.677953	0.266701	2.542	0.011022	0.0386642	1251.06	0.273948	0.108375	2.52778	0.0114787	0.0216449	322.963	0.384181	0.23486	1.63579	0.101884	0.230256	NOL4L
NM_001256864.2	53.7943	-0.142917	0.265587	-0.538119	0.590495	0.724733	227.092	-0.0682519	0.190649	-0.357998	0.720345	0.7751	111.029	-0.0929204	0.318765	-0.291501	0.770668	0.859447	DNAJC6
NM_001256875.2	185.009	0.34669	0.141076	2.45746	0.0139923	0.0469895	1246.39	0.140638	0.0947653	1.48407	0.137791	0.193013	482.809	0.198715	0.15071	1.31852	0.187329	0.349073	CDCA8
NM_001257180.2	62.2708	-0.479488	0.232213	-2.06486	0.0389363	0.104007	634.542	-0.256884	0.11193	-2.29504	0.0217307	0.038135	209.103	-0.230829	0.217491	-1.06133	0.288542	0.466535	SLC20A2
NM_001258038.2	194.52	0.778387	0.148304	5.2486	1.53262563575871e-07	2.60052957471895e-06	2861.99	0.676987	0.0789473	8.57518	9.89343728323992e-18	2.00896375869549e-16	844.192	0.0999655	0.1466	0.681895	0.495305	0.657289	SPRY1
NM_001258217.2	126.523	0.0771026	0.168909	0.456475	0.648048	0.768851	619.076	-0.265514	0.108978	-2.43639	0.0148348	0.0271707	279.577	0.323532	0.175591	1.84253	0.0653983	0.167712	MIS12
NM_001258249.2	115.777	0.0725828	0.177188	0.409638	0.682071	0.792274	296.859	0.0239717	0.138273	0.173365	0.862364	0.891893	197.438	0.0400337	0.197026	0.20319	0.838987	0.902075	UTY
NM_001258308.2	155.983	0.575264	0.158656	3.62585	0.000288016	0.0019903	945.47	0.537353	0.111935	4.80058	1.58209205615552e-06	7.14868083497191e-06	384.265	0.0227139	0.182055	0.124764	0.90071	0.941814	NOP2
NM_001258315.2	1207.49	0.249992	0.0905214	2.76169	0.00575033	0.0228631	1782.69	0.495728	0.0963636	5.14435	2.68446350715164e-07	1.39383696702199e-06	1774.53	-0.254331	0.133948	-1.89873	0.0576003	0.153407	ECT2
NM_001258374.3	188.667	0.152156	0.154039	0.987776	0.323262	0.487931	619.787	0.512217	0.101091	5.06689	4.04360465160744e-07	2.03192942153225e-06	351.191	-0.354976	0.163261	-2.17429	0.0296834	0.0954213	EPS15L1
NM_001258392.3	138.739	0.195219	0.167353	1.16651	0.243409	0.400834	498.525	-0.037189	0.116889	-0.318156	0.750367	0.800322	267.487	0.224392	0.182577	1.22903	0.219062	0.388134	CLPB
NM_001258419.2	32.8726	0.226835	0.319688	0.709552	0.477982	0.630013	284.21	0.636281	0.172577	3.68693	0.000226974	0.000650581	99.3989	-0.404145	0.327699	-1.23328	0.217471	0.386126	LRRC4C
NM_001258429.2	57.5917	-0.162077	0.23897	-0.678233	0.497624	0.646504	1332.02	-0.476766	0.0831291	-5.73526	9.73654117398743e-09	6.45045852776667e-08	354.82	0.296931	0.196376	1.51205	0.13052	0.273904	C20orf27
NM_001260.3	112.542	-0.0804877	0.179765	-0.447739	0.654342	0.772804	583.571	-0.151967	0.110548	-1.37467	0.169234	0.230505	255.809	0.0575144	0.184587	0.311585	0.755356	0.850263	CDK8
NM_001261.4	141.71	0.445433	0.159339	2.79551	0.00518178	0.0210896	995.121	0.128522	0.0918607	1.3991	0.161783	0.22161	378.54	0.310964	0.154628	2.01104	0.0443209	0.128382	CDK9
NM_001261413.2	799.065	0.160662	0.0887066	1.81116	0.0701156	0.161774	2860.59	0.0451656	0.081462	0.554437	0.57928	0.649839	1538.35	0.107342	0.109408	0.981117	0.326535	0.504275	DCTN2
NM_001261434.2	104.541	-0.116299	0.181268	-0.641585	0.521143	0.667297	491.612	-0.415566	0.114093	-3.64236	0.000270154	0.000757601	226.694	0.296997	0.183809	1.61579	0.10614	0.23758	AARSD1
NM_001261826.3	455.251	-0.0245329	0.101596	-0.241475	0.809187	0.885262	3731.86	0.309213	0.086303	3.58287	0.000339833	0.000931309	1332.35	-0.343496	0.124697	-2.75465	0.00587552	0.027786	AP3D1
NM_001261833.2	121.316	-0.546852	0.179217	-3.05134	0.00227821	0.0110797	393.481	-0.42334	0.124121	-3.4107	0.000647959	0.0016683	224.724	-0.124274	0.191505	-0.648932	0.516382	0.673702	JRKL
NM_001261843.2	76.1632	-0.382253	0.210916	-1.81235	0.0699321	0.161439	510.012	-0.210063	0.108793	-1.93084	0.0535024	0.0845266	198.044	-0.194293	0.196185	-0.990354	0.322001	0.500565	ZNF623
NM_001265577.2	82.5742	0.755422	0.207526	3.64014	0.000272493	0.00190069	621.033	0.503345	0.11746	4.28523	1.82550734544914e-05	6.61658081724726e-05	229.563	0.257429	0.211687	1.21608	0.223954	0.395095	KIF18B
NM_001265589.2	1601.81	-0.0155456	0.0820477	-0.189471	0.849724	0.911405	6763.72	-0.134615	0.080776	-1.66653	0.0956085	0.14056	3306.75	0.110972	0.111933	0.991422	0.32148	0.499948	RTN3
NM_001267046.2	122.153	1.10055	0.178101	6.17936	6.43631026073324e-10	1.69616888839886e-08	559.797	0.9446	0.12388	7.62512	2.43813801730111e-14	3.39606430938784e-13	261.746	0.150182	0.199705	0.752023	0.452037	0.621487	FRMD6
NM_001267594.2	126.911	-0.277571	0.172492	-1.60918	0.107577	0.222679	716.55	-0.158799	0.0942824	-1.6843	0.0921246	0.136056	301.127	-0.113208	0.162976	-0.694631	0.487287	0.650127	SENP1
NM_001268.4	134.189	-0.0256944	0.166451	-0.154366	0.877321	0.931325	610.396	0.11792	0.108286	1.08897	0.276168	0.350123	286.513	-0.160456	0.172602	-0.929631	0.352562	0.528405	RCBTB2
NM_001270.4	1251.31	0.186622	0.0869924	2.14527	0.0319312	0.0897287	2003.2	0.343505	0.0763237	4.50063	6.77529515180835e-06	2.6855791272008e-05	1872.52	-0.167265	0.104592	-1.59921	0.109774	0.242944	CHD1
NM_001270366.2	99.6885	0.885028	0.191001	4.63364	3.59292311896564e-06	4.4954184958809e-05	2066.72	0.763751	0.0948722	8.05031	8.25836672669491e-16	1.37264805534237e-14	562.814	0.133437	0.184872	0.721781	0.470429	0.637624	PLPPR3
NM_001270377.2	66.178	0.0494272	0.22476	0.219911	0.825941	0.896672	364.202	-0.25899	0.132485	-1.95486	0.0506002	0.0804998	155.014	0.296966	0.226774	1.30952	0.190357	0.352612	ANKRD46
NM_001270454.2	126.14	0.178783	0.167685	1.06619	0.286339	0.447497	942.416	-0.0967052	0.0995445	-0.971478	0.33131	0.408121	349.24	0.278309	0.17025	1.63471	0.10211	0.230522	WWP2
NM_001270520.2	610.821	0.0268637	0.112259	0.239301	0.810872	0.885998	1641.07	-0.161919	0.0783155	-2.06752	0.0386849	0.0633866	1057.73	0.180212	0.133335	1.35157	0.176512	0.334705	DAAM1
NM_001270531.2	467.459	0.456087	0.106349	4.2886	1.79798798676669e-05	0.000183009	1332.89	0.321255	0.0817698	3.92877	8.53826541315735e-05	0.00026738	826.098	0.121999	0.115076	1.06016	0.289071	0.466986	WTAP
NM_001270616.2	79.7274	2.00793	0.225401	8.90824	5.1847683398106e-19	4.46154606220641e-17	351.898	2.27516	0.166183	13.6907	1.1536146775807e-42	1.13040824278751e-40	167.998	-0.273644	0.268319	-1.01985	0.307802	0.486757	PROX1
NM_001270764.2	59.715	1.15931	0.237748	4.87619	1.08152469287374e-06	1.51503284634622e-05	972.665	1.29628	0.105412	12.2973	9.36256312975419e-35	6.1161487980185e-33	279.594	-0.131536	0.21597	-0.609048	0.542493	0.694338	CHST15
NM_001270875.3	135.861	0.335348	0.163704	2.0485	0.0405108	0.107026	1383.68	-0.039602	0.0880034	-0.450006	0.652706	0.715726	456.031	0.380633	0.156741	2.42842	0.0151647	0.0576995	MEAF6
NM_001270941.2	197.225	-0.0852398	0.139809	-0.609686	0.54207	0.684835	1036.39	0.319176	0.0990382	3.22275	0.00126966	0.0030561	451.365	-0.414519	0.15337	-2.70274	0.006877	0.0314463	JAKMIP2
NM_001270960.2	123.655	0.185593	0.167931	1.10517	0.269085	0.429121	1107.91	-0.273022	0.11109	-2.45767	0.013984	0.0258146	382.226	0.44747	0.185919	2.4068	0.0160928	0.0603134	NOSIP
NM_001270974.2	72.588	-0.633246	0.234162	-2.70431	0.00684474	0.0263913	176.926	0.693358	0.195274	3.55069	0.000384225	0.00103944	121.77	-1.3304	0.290087	-4.58622	4.51352809972763e-06	9.10480118107736e-05	HYDIN
NM_001270975.2	470.088	0.222471	0.109495	2.03179	0.0421752	0.110298	3010.31	0.23609	0.0815987	2.8933	0.00381212	0.00816177	1192.77	-0.0218904	0.127107	-0.17222	0.863265	0.919768	IST1
NM_001271.4	197.164	0.573447	0.138055	4.15377	3.27038842058857e-05	0.000304808	2167.29	0.360135	0.0764653	4.70979	2.47977407065711e-06	1.07054590642559e-05	696.482	0.211468	0.131014	1.61408	0.106509	0.237967	CHD2
NM_001271186.2	91.2322	0.138202	0.193915	0.712694	0.476035	0.628724	1049.49	0.0297533	0.0968678	0.307154	0.758726	0.807806	332.318	0.103306	0.182373	0.566452	0.571086	0.717255	RAP2C
NM_001271641.2	434.201	0.0616195	0.10478	0.588086	0.556475	0.696047	6148.65	-0.272035	0.0680707	-3.99636	6.43249647026987e-05	0.000207054	1831.52	0.325482	0.105762	3.07751	0.0020874	0.0124772	MTCH1
NM_001271696.3	402.958	0.0192772	0.107827	0.178778	0.858112	0.916471	546.9	0.240263	0.107037	2.24467	0.0247896	0.0428165	581.725	-0.230231	0.129324	-1.78027	0.0750326	0.184993	ABCB7
NM_001271803.2	103.097	0.0183437	0.186425	0.0983971	0.921617	0.958677	2038.68	-0.219252	0.0988911	-2.21711	0.0266158	0.0456527	560.37	0.226488	0.187218	1.20975	0.226374	0.398162	REEP2
NM_001271838.2	108.031	0.0428441	0.181452	0.236117	0.813342	0.887655	416.779	0.197178	0.122613	1.60813	0.107807	0.156124	214.496	-0.169819	0.191736	-0.885692	0.375784	0.550082	RSRC1
NM_001271852.3	96.9156	-0.0981507	0.196109	-0.50049	0.61673	0.743196	314.142	0.0523833	0.132013	0.396805	0.691511	0.750369	179.475	-0.143587	0.206937	-0.693869	0.487765	0.650353	CEP57L1
NM_001271874.2	130.722	-0.0335847	0.162036	-0.207267	0.835802	0.903191	893.278	-0.147856	0.0905546	-1.63279	0.102514	0.149529	343.821	0.103087	0.152253	0.677081	0.498355	0.659675	AAR2
NM_001271875.2	93.9822	0.0136263	0.192856	0.070655	0.943672	0.969068	2943.15	0.133553	0.0940473	1.42006	0.15559	0.214136	746.027	-0.13741	0.183377	-0.74933	0.453658	0.623106	CUEDC1
NM_001271938.2	261.254	-0.084133	0.131553	-0.639538	0.522473	0.668591	3642.39	0.297768	0.0828162	3.59552	0.000323742	0.000890107	1090.02	-0.382357	0.142913	-2.67544	0.00746302	0.0336155	MEGF8
NM_001271958.2	214.992	0.389373	0.136615	2.85015	0.00436985	0.0184578	3944.99	-0.158456	0.0763038	-2.07665	0.0378336	0.0622217	1102.13	0.534375	0.13466	3.96833	7.23769794066918e-05	0.000873718	SLC39A1
NM_001271977.2	180.668	0.218255	0.157597	1.38489	0.166086	0.306544	4128.17	-0.100315	0.0662852	-1.51338	0.130184	0.183925	1102.36	0.325972	0.141387	2.30552	0.0211374	0.0738015	STK25
NM_001272004.3	126.89	-0.573105	0.17767	-3.22567	0.00125677	0.00685979	675.843	0.114754	0.104306	1.10017	0.27126	0.345058	292.361	-0.683222	0.181757	-3.75898	0.000170608	0.00171555	EPC1
NM_001272013.2	112.424	-0.477249	0.17588	-2.71349	0.00665781	0.0257666	1608.27	-0.303308	0.0803082	-3.7768	0.000158853	0.000471026	477.737	-0.182231	0.155739	-1.17011	0.241958	0.414168	ITPRIP
NM_001272063.2	670.249	0.00536944	0.100322	0.0535221	0.957316	0.977721	1726.94	0.691358	0.820195	0.842919	0.399274	0.477932	1144.43	-0.684184	0.844231	-0.810423	0.417697	0.589756	MAGED4
NM_001272071.2	723.099	-0.101814	0.103917	-0.979769	0.3272	0.491763	2710.11	0.162038	0.0938057	1.72738	0.0840995	0.12528	1418.51	-0.272029	0.143368	-1.89741	0.0577737	0.153717	AP1S2
NM_001273.5	2815.27	0.0605547	0.090928	0.665964	0.505434	0.652922	6600.49	0.173489	0.0688972	2.51809	0.0117995	0.0221951	4667.2	-0.122339	0.120129	-1.01839	0.308492	0.487391	CHD4
NM_001276252.2	65.209	-0.162642	0.224916	-0.723123	0.469604	0.623453	1483.27	0.00118844	0.0857361	0.0138616	0.98894	0.991883	396.459	-0.164104	0.18859	-0.87016	0.384213	0.558182	WDTC1
NM_001276270.2	133.362	0.075744	0.166624	0.454579	0.649412	0.769658	640.024	0.347332	0.108005	3.2159	0.00130036	0.00311754	292.009	-0.281596	0.173588	-1.62221	0.104758	0.235238	MBD4
NM_001276277.3	415.699	0.0636132	0.107869	0.589726	0.555374	0.695189	1283.92	0.273573	0.0972626	2.81273	0.00491231	0.0102112	756.098	-0.220141	0.134443	-1.63743	0.101541	0.229728	PPIP5K2
NM_001276380.2	348.642	0.117261	0.115974	1.0111	0.311967	0.47703	626.933	0.290872	0.116258	2.50194	0.0123513	0.0231196	536.537	-0.183587	0.150422	-1.22048	0.222283	0.392718	ESF1
NM_001277.3	254.465	0.338733	0.134671	2.51527	0.0118942	0.041125	1186.32	-0.0885209	0.0834157	-1.0612	0.288598	0.363367	549.583	0.404203	0.137909	2.93095	0.00337931	0.018023	CHKA
NM_001277062.2	217.627	0.0526987	0.132122	0.398863	0.689995	0.798617	799.589	0.127185	0.116976	1.08728	0.276914	0.350858	423.426	-0.0821515	0.165652	-0.495929	0.619944	0.753006	MFF
NM_001277074.2	42.1062	0.862707	0.277132	3.11298	0.00185207	0.00938048	630.873	-0.184353	0.123279	-1.49541	0.134808	0.18937	185.106	1.03896	0.256391	4.05226	5.07255849846891e-05	0.000657017	CCDC12
NM_001277403.2	90.3459	-0.213972	0.213578	-1.00184	0.316419	0.48105	147.447	0.20926	0.178322	1.17349	0.240599	0.311448	135.805	-0.433282	0.244742	-1.77036	0.076667	0.188252	ZNF730
NM_001277406.2	1817.63	0.0844102	0.310937	0.27147	0.786029	0.869551	36.716	1.05541	0.360585	2.92693	0.00342327	0.00741402	2097.23	-0.979189	0.438793	-2.23155	0.0256445	0.0856036	POTEI
NM_001278.5	123.76	-0.329253	0.16798	-1.96007	0.0499878	0.125088	590.807	0.630165	0.11222	5.61543	1.96074673393902e-08	1.22722349261492e-07	270.357	-0.965799	0.175429	-5.50536	3.68420098694613e-08	1.63500961694367e-06	CHUK
NM_001278116.2	1634.54	-0.217898	0.0753698	-2.89105	0.00383956	0.0167161	6305.71	0.0109183	0.0772621	0.141315	0.887621	0.912527	3245.63	-0.23782	0.0999979	-2.37825	0.0173949	0.0633853	L1CAM
NM_001278356.2	102.412	0.321567	0.20419	1.57484	0.115294	0.233439	1062.62	0.525968	0.119699	4.3941	1.11233395800485e-05	4.22045847100716e-05	348.115	-0.230116	0.227104	-1.01326	0.310936	0.490028	FRS2
NM_001278509.3	75.0307	-0.904177	0.214881	-4.2078	2.57873964633087e-05	0.000247401	316.758	-0.401653	0.147674	-2.71986	0.00653101	0.0131478	154.891	-0.512206	0.234025	-2.18868	0.0286203	0.0929251	ZNF180
NM_001278512.2	43.0058	0.402958	0.28296	1.42408	0.154423	0.290357	234.94	-0.334722	0.157951	-2.11915	0.0340781	0.0567205	100.312	0.745067	0.280165	2.65939	0.00782823	0.0348141	AP3B2
NM_001278556.2	1688.07	-0.235352	0.0774871	-3.03731	0.00238699	0.0115092	3992.19	-0.23924	0.0915459	-2.61334	0.00896622	0.0174096	2805.38	-0.00443176	0.119525	-0.0370781	0.970423	0.982895	ARPC3
NM_001278559.2	39.1713	0.580325	0.296372	1.9581	0.0502188	0.125517	1740.37	0.140706	0.0886082	1.58796	0.112296	0.161653	422.342	0.454712	0.233151	1.95029	0.0511421	0.141131	ZNF316
NM_001278624.2	79.997	-0.831535	0.216016	-3.84941	0.000118402	0.000928822	135.52	-0.260612	0.189515	-1.37515	0.169084	0.230371	121.294	-0.581041	0.248689	-2.33641	0.0194697	0.0692986	NFXL1
NM_001278628.2	345.077	-0.235417	0.112896	-2.08525	0.0370471	0.10007	626.459	-0.041485	0.109579	-0.378586	0.704995	0.762448	532.423	-0.204552	0.138998	-1.47162	0.141124	0.288056	CRNKL1
NM_001278639.2	1292.59	0.0358038	0.0852679	0.419897	0.67456	0.787127	3342.21	-0.109022	0.0980943	-1.1114	0.266396	0.340242	2209.86	0.138775	0.1335	1.03952	0.298565	0.476799	RANBP1
NM_001278689.2	67.3565	-0.288034	0.231679	-1.24325	0.213777	0.365898	252.766	-0.365853	0.149328	-2.45	0.0142856	0.0263135	132.181	0.0728146	0.243156	0.299457	0.764592	0.855725	EOGT
NM_001278716.2	48.6049	0.235946	0.257358	0.916801	0.359247	0.52445	367.267	-0.209354	0.120185	-1.74192	0.0815216	0.121957	135.452	0.444177	0.229946	1.93166	0.0534015	0.14558	FBXL4
NM_001281.3	415.866	0.112047	0.122311	0.916086	0.359622	0.524778	3956.92	-0.494099	0.0932279	-5.2999	1.15865175411144e-07	6.40679680570677e-07	1335.26	0.599559	0.156328	3.83527	0.000125425	0.00134041	TBCB
NM_001281293.2	297.176	0.197545	0.117747	1.67771	0.0934034	0.20109	793.709	0.421704	0.115928	3.63763	0.000275163	0.000769343	513.584	-0.232875	0.154331	-1.50893	0.131316	0.275034	ZNF281
NM_001281453.2	117.593	0.751524	0.182419	4.11978	3.79239370223043e-05	0.000349522	5053.32	0.0990027	0.0791685	1.25053	0.211105	0.278576	1230.63	0.620122	0.165565	3.74549	0.000180039	0.00179231	MBD3
NM_001281740.3	106.038	0.505699	0.17873	2.8294	0.00466361	0.0194022	704.669	0.831717	0.0978961	8.49591	1.96382205340502e-17	3.8666187953374e-16	274.7	-0.33602	0.168159	-1.99823	0.0456923	0.131047	FHOD3
NM_001281775.3	360.065	-0.113647	0.117503	-0.967186	0.333451	0.497874	1442.27	-0.741442	0.124567	-5.95215	2.64638441099422e-09	1.91919805778384e-08	726.344	0.615246	0.182544	3.37039	0.000750608	0.0056159	ZMYND8
NM_001282112.2	50.4803	0.103523	0.282054	0.367032	0.713595	0.817851	356.378	0.223385	0.153176	1.45835	0.144743	0.201312	135.279	-0.146494	0.295012	-0.49657	0.619492	0.752662	TOP3B
NM_001282116.2	314.909	0.744209	0.118322	6.28969	3.18107657988898e-10	9.00201973094085e-09	1496.77	0.389266	0.0854888	4.55341	5.27824812511521e-06	2.13639754804735e-05	686.397	0.349474	0.128693	2.71557	0.00661615	0.0304516	RFX3
NM_001282129.2	68.4782	-0.0261906	0.220469	-0.118795	0.905438	0.94887	440.154	0.29647	0.143894	2.06034	0.039366	0.0643526	174.115	-0.327053	0.241985	-1.35154	0.176522	0.334705	SSH2
NM_001282195.2	58.2361	0.0766558	0.241777	0.317051	0.751205	0.844324	251.644	0.230939	0.148774	1.55229	0.120594	0.17207	121.51	-0.178305	0.246476	-0.723416	0.469424	0.636876	SLC25A14
NM_001282359.2	148.954	-0.516583	0.163141	-3.16648	0.00154294	0.00810635	391.613	-0.592912	0.130137	-4.55607	5.2120402627028e-06	2.11362793373599e-05	256.031	0.078722	0.186436	0.422246	0.672845	0.791826	ZNF107
NM_001282531.3	1037.93	-0.00557794	0.0836767	-0.0666606	0.946852	0.970679	4161.31	0.0608878	0.0785636	0.775013	0.438332	0.516934	2094.8	-0.0742388	0.104099	-0.713154	0.475751	0.641326	ADNP
NM_001282547.2	82.9517	0.39972	0.201565	1.98308	0.0473584	0.11986	3139.28	0.375101	0.0892509	4.20277	2.63665755794395e-05	9.19284784476361e-05	776.071	0.00911971	0.182628	0.049936	0.960173	0.976502	STK40
NM_001282597.3	73.2862	0.0031458	0.212942	0.014773	0.988213	0.994701	243.082	0.375633	0.160527	2.34001	0.0192834	0.0342108	136.935	-0.38225	0.237973	-1.60628	0.108213	0.240754	CTNNA2
NM_001282659.2	944.941	0.210118	0.0936167	2.24445	0.0248036	0.0734131	2138.08	0.611394	0.0815661	7.49569	6.59518120714399e-14	8.75237669804762e-13	1549.52	-0.411782	0.116188	-3.5441	0.000393956	0.00341051	USP47
NM_001282680.3	427.067	0.585256	0.111036	5.27084	1.35798064572304e-07	2.33711240518008e-06	870.065	0.714325	0.105165	6.79244	1.10252007225145e-11	1.089207110066e-10	679.489	-0.139365	0.143485	-0.971288	0.331405	0.509092	GAPVD1
NM_001282684.2	66.176	0.0842683	0.229294	0.367513	0.713237	0.817662	931.301	-0.348125	0.107574	-3.23615	0.00121153	0.00293125	277.893	0.442061	0.217565	2.03186	0.0421679	0.124018	KCTD17
NM_001282805.2	785.725	-0.0570628	0.088811	-0.64252	0.520536	0.666719	1580.38	0.186911	0.0981551	1.90424	0.0568791	0.0892588	1245.73	-0.253175	0.126897	-1.99511	0.0460306	0.131703	MARCHF7
NM_001282857.2	242.915	0.359491	0.133698	2.68883	0.00717033	0.0273732	431.439	0.55412	0.119205	4.64845	3.34432753471826e-06	1.40421764499605e-05	372.749	-0.205129	0.158955	-1.29049	0.196881	0.360031	XRN1
NM_001282860.2	287.996	0.23614	0.121362	1.94575	0.0516853	0.128308	1388.12	0.0396422	0.0866354	0.457576	0.647257	0.711318	631.879	0.187916	0.130383	1.44126	0.14951	0.299051	GON4L
NM_001282874.2	1688.16	-0.141643	0.0808264	-1.75243	0.0797	0.178769	2133.34	0.273867	0.0904864	3.02662	0.00247308	0.00554346	2402.99	-0.424104	0.117043	-3.6235	0.000290644	0.00266381	SMARCA1
NM_001283.5	219.046	0.137138	0.136449	1.00505	0.314873	0.47989	1398.25	-0.560394	0.101812	-5.5042	3.70839113022235e-08	2.24986407878933e-07	554.722	0.688966	0.161132	4.27579	1.9046168844508e-05	0.00029159	AP1S1
NM_001283009.2	39.939	-0.163471	0.287529	-0.568538	0.56967	0.707515	501.633	0.0728044	0.115241	0.631756	0.527547	0.601086	154.634	-0.24814	0.247557	-1.00236	0.316172	0.494658	RTEL1
NM_001283041.3	98.7881	0.0150088	0.182607	0.0821917	0.934494	0.963869	612.503	0.289324	0.103929	2.78387	0.00537145	0.0110727	246.32	-0.276178	0.174706	-1.58082	0.11392	0.24866	USP25
NM_001284.4	245.935	-0.428844	0.130736	-3.28024	0.00103718	0.00582327	1238.64	-0.232044	0.094535	-2.45458	0.0141051	0.0260038	551.125	-0.205009	0.1463	-1.40129	0.161128	0.314134	AP3S1
NM_001284236.3	480.323	0.450092	0.0994908	4.52396	6.06926618255711e-06	7.07931458350541e-05	731.924	0.596504	0.119938	4.97343	6.57800586406542e-07	3.18579628830341e-06	710.711	-0.15482	0.146177	-1.05913	0.28954	0.466986	ZFYVE16
NM_001284240.2	115.499	0.278812	0.172296	1.61822	0.105616	0.219747	961.144	0.968298	0.110819	8.73768	2.37954786739378e-18	5.16815718518747e-17	341.139	-0.700702	0.182849	-3.83214	0.000127034	0.00135417	CCSER2
NM_001284254.2	43.1248	0.281622	0.286415	0.983268	0.325476	0.489869	2215.75	0.0400218	0.100086	0.399874	0.689249	0.748396	529.874	0.252194	0.239693	1.05215	0.292729	0.470419	GUCD1
NM_001284259.2	526.407	0.123441	0.113234	1.09014	0.275652	0.436244	497.829	0.661343	0.142256	4.64896	3.33618386988252e-06	1.40149658382353e-05	713.069	-0.546082	0.182859	-2.98636	0.00282319	0.0156819	KIF20B
NM_001284401.2	115.609	-0.472487	0.172207	-2.74372	0.00607469	0.0238713	271.813	-0.383616	0.141079	-2.71915	0.00654489	0.0131663	191.799	-0.0972762	0.190104	-0.511701	0.60886	0.745807	TAMM41
NM_001286.5	144.754	1.21636	0.179237	6.78633	1.15018311251882e-11	4.23558698160316e-10	1754.28	1.66319	0.101374	16.4064	1.72020527225901e-60	2.49933962574598e-58	547.004	-0.468291	0.194425	-2.4086	0.016014	0.0601258	CLCN6
NM_001286045.2	138.656	0.719495	0.160293	4.48863	7.16811810434609e-06	8.13576581076051e-05	651.532	0.821214	0.142972	5.74388	9.25307315015159e-09	6.14949900917409e-08	300.618	-0.110083	0.21292	-0.517018	0.605144	0.743477	RBM7
NM_001286069.2	125.222	0.150704	0.169509	0.889061	0.37397	0.537446	344.944	-0.0476003	0.122612	-0.388219	0.697854	0.756375	218.698	0.182314	0.176656	1.03203	0.302059	0.48074	C11orf54
NM_001286077.2	134.313	0.394751	0.162225	2.43336	0.0149595	0.0495188	1718.95	-0.176207	0.0806605	-2.18455	0.028922	0.0490591	526.871	0.562162	0.148313	3.79036	0.000150427	0.00154872	UBXN1
NM_001286086.2	38.6502	0.321172	0.301273	1.06605	0.286401	0.447512	786.79	-0.304372	0.136603	-2.22814	0.0258711	0.0444567	214.952	0.595475	0.290586	2.04922	0.0404404	0.120407	C11orf98
NM_001286134.2	236.594	0.473717	0.133552	3.54705	0.000389569	0.00255263	2511.39	0.0555938	0.0808741	0.687411	0.491824	0.566744	816.261	0.400559	0.136562	2.93316	0.00335535	0.017952	RIC8A
NM_001286176.2	220.746	0.188351	0.154991	1.21524	0.224274	0.378943	891.032	0.0871163	0.100262	0.868888	0.384908	0.463441	446.845	0.083898	0.176573	0.475145	0.634683	0.763042	C2CD5
NM_001286398.3	42.4545	0.386862	0.278717	1.38801	0.165133	0.305321	1163.03	1.14029	0.145109	7.85811	3.89967783136617e-15	5.96861754040346e-14	301.063	-0.7439	0.282727	-2.63116	0.00850933	0.0370613	RNF217
NM_001286445.3	400.968	0.287282	0.120783	2.37849	0.0173837	0.0555081	1118.32	0.312599	0.0913649	3.42143	0.000622924	0.00161024	703.202	-0.030487	0.141799	-0.215002	0.829766	0.897458	RIPOR2
NM_001286577.2	182.649	-0.17889	0.145461	-1.22981	0.218768	0.372516	640.642	0.469155	0.109578	4.28148	1.85657728384621e-05	6.71475397895795e-05	348.83	-0.655474	0.160962	-4.07224	4.65633958671803e-05	0.000613939	C2CD3
NM_001286581.2	144.228	0.65501	0.172512	3.79689	0.000146521	0.00111316	1600.33	0.485714	0.100905	4.8136	1.48236002316905e-06	6.72689710029379e-06	512.797	0.150603	0.187283	0.804147	0.421312	0.592925	PHRF1
NM_001286611.2	286.283	-0.322045	0.126868	-2.53843	0.011135	0.0389778	1042.57	-0.108555	0.0912641	-1.18946	0.234257	0.30408	555.062	-0.22123	0.139973	-1.58052	0.113988	0.248744	REPS1
NM_001286635.2	114.99	-0.283305	0.172002	-1.6471	0.0995366	0.210691	1711.36	-0.278563	0.07788	-3.57682	0.000347794	0.000950651	503.03	-0.0061424	0.150891	-0.0407075	0.967529	0.981253	C6orf89
NM_001286657.2	154.533	-0.499685	0.163693	-3.05259	0.00226879	0.0110402	455.577	-0.113326	0.128806	-0.879819	0.378958	0.457321	276.346	-0.397566	0.194064	-2.04863	0.0404983	0.120537	TMEM68
NM_001287.6	108.682	-0.0705853	0.17724	-0.398247	0.690448	0.798923	915.241	0.25552	0.0927252	2.75567	0.00585727	0.0119312	323.345	-0.339657	0.16605	-2.04551	0.040805	0.120938	CLCN7
NM_001287135.2	161.804	0.0521287	0.150411	0.346576	0.72891	0.827085	1209.6	0.506652	0.102482	4.94379	7.66180318885149e-07	3.66228108181801e-06	448.228	-0.46532	0.165167	-2.81727	0.00484332	0.0239104	CDK14
NM_001287491.2	123.253	0.62271	0.177627	3.50572	0.000455367	0.0029077	2462.04	0.970043	0.0913436	10.6197	2.41290822577221e-26	9.59131019744455e-25	675.6	-0.353743	0.172824	-2.04684	0.0406738	0.120766	TET3
NM_001287492.4	142.256	-1.02693	0.164359	-6.24808	4.15516600158239e-10	1.14138484988092e-08	416.932	-1.32907	0.125874	-10.5588	4.62561710627923e-26	1.80463311826922e-24	253.806	0.29619	0.180125	1.64436	0.100102	0.227543	FIGNL1
NM_001288565.2	183.62	0.0194098	0.153343	0.126577	0.899275	0.944407	1847.66	-0.501602	0.0870331	-5.76334	8.24643031615635e-09	5.52845411887427e-08	611.345	0.508595	0.157784	3.22337	0.00126693	0.00847837	TMEM9
NM_001288655.2	191.383	-0.0650847	0.144701	-0.449788	0.652863	0.771805	1547.07	-0.675081	0.0806305	-8.37252	5.6398192883947e-17	1.05380836237921e-15	555.108	0.609584	0.139848	4.35892	1.30707493780217e-05	0.000214935	DCAKD
NM_001288732.2	65.4347	0.21296	0.239569	0.888933	0.374039	0.537446	565.346	0.598683	0.139624	4.28782	1.80431759923936e-05	6.55387258999574e-05	197.755	-0.411542	0.259384	-1.58661	0.112601	0.246739	TEX2
NM_001288962.2	58.0639	-0.172365	0.234461	-0.735153	0.462247	0.618259	380.145	-0.0495595	0.124518	-0.39801	0.690623	0.749598	149.12	-0.125547	0.221737	-0.566199	0.571259	0.717255	TRIP10
NM_001288973.2	163.091	0.310721	0.154286	2.01393	0.0440169	0.113863	1461.14	0.569382	0.0907274	6.27575	3.47953854353523e-10	2.85234156676765e-09	504.249	-0.262058	0.156402	-1.67554	0.0938287	0.217518	ADAM12
NM_001288980.2	84.575	-0.279395	0.203919	-1.37013	0.170647	0.312841	623.919	-0.228766	0.139335	-1.64183	0.100624	0.147157	232.373	-0.0608099	0.234017	-0.259852	0.794978	0.875702	C18orf54
NM_001288985.2	186.388	-0.428974	0.153859	-2.7881	0.00530182	0.0214232	313.923	-0.0503225	0.139355	-0.361111	0.718017	0.772861	282.231	-0.388083	0.188548	-2.05827	0.0395643	0.11851	ABCA8
NM_001289104.2	704.975	0.218237	0.0945682	2.30772	0.0210147	0.0647249	3950.67	-0.298852	0.0837717	-3.56746	0.000360463	0.000983278	1666.53	0.507526	0.123514	4.10905	3.9728876440836e-05	0.000540313	PRKCSH
NM_001289125.3	67.3766	-0.0405863	0.219713	-0.184725	0.853445	0.913222	265.739	0.0742385	0.137689	0.539175	0.589766	0.659934	135.015	-0.123968	0.216529	-0.572527	0.566965	0.713956	IFNAR2
NM_001289187.2	87.7077	-1.17845	0.208709	-5.6464	1.63846370115399e-08	3.40324246104226e-07	441.452	-0.887674	0.140647	-6.31136	2.76592688412657e-10	2.29640057660439e-09	196.466	-0.299376	0.234284	-1.27783	0.201308	0.366149	ZNF302
NM_001289971.2	103.777	-0.714779	0.1921	-3.72087	0.000198541	0.0014496	980.405	-0.835638	0.106617	-7.83775	4.58708354908505e-15	6.93991976088684e-14	331.628	0.116256	0.194801	0.596792	0.550646	0.700203	ZNF84
NM_001290.5	116.721	0.348021	0.179155	1.94257	0.0520684	0.129069	576.441	0.269296	0.134095	2.00825	0.044617	0.0718081	259.119	0.0715578	0.215349	0.332287	0.739672	0.838567	LDB2
NM_001290047.2	93.9208	-0.129496	0.191854	-0.674972	0.499693	0.648394	786.923	0.553771	0.108437	5.10683	3.27613052481311e-07	1.67523980173544e-06	278.583	-0.678291	0.192247	-3.52822	0.000418369	0.00355614	CECR2
NM_001290117.2	167.781	0.222855	0.154823	1.43943	0.15003	0.284673	289.505	-0.203809	0.143502	-1.42025	0.155534	0.214094	255.527	0.415696	0.189263	2.19639	0.0280639	0.0917546	TIMM23B
NM_001290223.2	715.618	-0.259662	0.0888146	-2.92364	0.00345968	0.0154613	2087.53	0.371127	0.0951147	3.90189	9.54456277600333e-05	0.000296033	1275.09	-0.640079	0.123139	-5.19801	2.0143179159724e-07	6.57159839747704e-06	DOCK1
NM_001290264.2	64.6643	0.238625	0.224536	1.06275	0.287897	0.448794	3667.27	-0.203725	0.0686178	-2.96898	0.00298789	0.00657585	869.033	0.438804	0.173177	2.53385	0.0112816	0.0458218	SLC35E2B
NM_001290321.3	369.011	0.11762	0.117221	1.00341	0.315664	0.480504	657.409	0.358624	0.130438	2.74939	0.00597068	0.0121337	566.723	-0.248339	0.176242	-1.40908	0.158811	0.3112	DMXL1
NM_001291303.3	594.396	-0.25276	0.109754	-2.30297	0.0212804	0.0653999	520.48	0.642627	0.125908	5.10395	3.32639628136459e-07	1.69579803164304e-06	796.161	-0.903883	0.162321	-5.56848	2.56974330978001e-08	1.20378197711473e-06	FAT4
NM_001291415.2	168.799	0.291743	0.146406	1.9927	0.0462947	0.118054	478.469	0.721392	0.1159	6.22424	4.8389376920318e-10	3.90965751972694e-09	297.77	-0.436103	0.161809	-2.69517	0.00703536	0.0320834	KDM6A
NM_001291694.2	65.7379	0.753688	0.227871	3.30752	0.000941259	0.00535603	2016.77	0.470873	0.0821843	5.72947	1.00745450627111e-08	6.64825303394414e-08	512.733	0.281868	0.185872	1.51646	0.129403	0.27274	NR2C2
NM_001291867.2	119.459	0.154942	0.173118	0.895006	0.370784	0.534682	495.204	-0.0483685	0.144775	-0.334094	0.738309	0.790262	244.603	0.194664	0.218436	0.891173	0.372837	0.546952	NHS
NM_001291941.3	83.1277	-0.742126	0.215212	-3.44835	0.000564019	0.00349408	426.427	-0.536328	0.121497	-4.41431	1.0133087750273e-05	3.87087626797599e-05	187.975	-0.216693	0.215313	-1.00641	0.314218	0.493097	C3orf14
NM_001291978.2	241.391	0.159412	0.13016	1.22474	0.220674	0.374599	1090.29	0.498573	0.0839805	5.93677	2.90688492937818e-09	2.09908477291088e-08	513.837	-0.355952	0.129653	-2.74542	0.0060433	0.02842	NOP14
NM_001291999.2	161.34	0.312968	0.163077	1.91914	0.0549667	0.13428	364.35	0.162907	0.132908	1.22571	0.220309	0.288778	264.392	0.13369	0.194749	0.686475	0.492413	0.655101	NCK1
NM_001292034.3	224.629	0.721241	0.151717	4.75385	1.99582974167826e-06	2.6588992435344e-05	2411.3	1.23452	0.0977417	12.6304	1.43475024758262e-36	1.03338806293835e-34	781.139	-0.515498	0.176349	-2.92317	0.00346489	0.0183748	TAB2
NM_001293.3	576.56	0.134935	0.109548	1.23174	0.218045	0.371397	2321.88	-0.156006	0.0757968	-2.05822	0.0395694	0.0646223	1165.68	0.284064	0.125029	2.27199	0.0230873	0.0788466	CLNS1A
NM_001293298.2	75.1484	0.106824	0.213513	0.500318	0.616851	0.743236	223.561	0.175466	0.167033	1.05049	0.293492	0.368593	134.806	-0.0822823	0.244406	-0.336663	0.736371	0.836746	CEMIP
NM_001294.4	522.313	0.157356	0.113351	1.38822	0.165071	0.305299	2295.11	0.336377	0.0735722	4.57206	4.82944617140032e-06	1.9711538444708e-05	1097.92	-0.182089	0.128456	-1.41752	0.156332	0.308132	CLPTM1
NM_001294338.2	76.2873	-0.187554	0.206267	-0.909279	0.363203	0.528085	767.485	-0.727634	0.111826	-6.50682	7.67564855214458e-11	6.85924606033111e-10	253.958	0.536347	0.20304	2.64159	0.00825187	0.036185	CLK2
NM_001297551.2	143.658	-0.619857	0.164761	-3.76215	0.000168458	0.0012555	523.251	-0.777148	0.116683	-6.66035	2.73174978566418e-11	2.61002896188118e-10	278.479	0.161416	0.179045	0.901538	0.367302	0.540883	TMEM128
NM_001297568.2	64.3184	0.353871	0.226926	1.55941	0.118899	0.239245	201.921	0.28108	0.162188	1.73306	0.0830858	0.123967	117.673	0.0614336	0.241785	0.254083	0.799431	0.878624	ZNF124
NM_001297595.2	130.592	-0.0320275	0.172995	-0.185135	0.853123	0.912993	1334.59	0.0852629	0.0993246	0.858427	0.390657	0.469289	439.37	-0.110637	0.177905	-0.621889	0.534015	0.688119	SIN3B
NM_001297599.2	186.516	0.716854	0.141915	5.05131	4.38792868095973e-07	6.64333977855177e-06	960.576	0.395692	0.110705	3.57428	0.000351188	0.000959617	422.573	0.312481	0.167684	1.86351	0.0623906	0.16257	MIER3
NM_001297654.2	1067.3	0.0986721	0.0832197	1.18568	0.235748	0.392123	15384.3	-0.0519034	0.0731104	-0.709931	0.477747	0.553626	4561.12	0.143022	0.101854	1.40419	0.160262	0.31302	DDR1
NM_001297671.3	104.327	0.913536	0.188127	4.85595	1.19811239751446e-06	1.66178977767097e-05	1090.18	0.386981	0.104762	3.69389	0.000220847	0.000633881	356.23	0.52332	0.190931	2.74089	0.00612731	0.028703	RGL1
NM_001297719.2	40.5027	0.870251	0.298907	2.91145	0.00359761	0.0159344	262.276	0.800167	0.202651	3.94849	7.86444658695703e-05	0.000247937	103.397	0.0497571	0.353788	0.140641	0.888153	0.934329	ARNTL
NM_001297732.2	61.7448	0.00353107	0.234769	0.0150406	0.988	0.994605	414.428	-0.333047	0.127736	-2.6073	0.00912603	0.0176712	160.748	0.321141	0.231677	1.38616	0.165698	0.320378	COX18
NM_001297776.2	190.47	-1.04656	0.152854	-6.84677	7.55371722742628e-12	2.89547715358572e-10	1315.8	-0.999689	0.0991208	-10.0856	6.39941402528165e-24	2.12314417287592e-22	503.948	-0.0555471	0.168309	-0.330029	0.741378	0.839664	RIMKLB
NM_001300.6	128.674	0.832595	0.178957	4.6525	3.27941220592875e-06	4.14001244499957e-05	2021.02	0.593646	0.12415	4.78168	1.73839186588819e-06	7.77983444176301e-06	586.082	0.231275	0.216708	1.06722	0.285872	0.463374	KLF6
NM_001300759.2	51.9142	0.10038	0.272163	0.368823	0.71226	0.817209	297.044	-1.43342	0.138234	-10.3695	3.41439393687972e-25	1.22438713642917e-23	123.981	1.48564	0.260321	5.70697	1.15006062115572e-08	5.80677314825453e-07	TRIM36
NM_001300791.2	169.076	0.22171	0.148975	1.48824	0.136688	0.266025	398.218	0.374433	0.13071	2.8646	0.0041754	0.00884074	280.665	-0.167901	0.177933	-0.943619	0.345364	0.521645	KIF3A
NM_001300816.3	68.1027	0.293121	0.239709	1.22282	0.221396	0.375513	381.632	0.432258	0.122688	3.52323	0.000426318	0.00113978	161.017	-0.178723	0.231216	-0.772969	0.439541	0.610837	ZCCHC10
NM_001300826.2	74.952	-0.269658	0.215709	-1.2501	0.211262	0.362845	405.99	-0.040921	0.137789	-0.296982	0.76648	0.814929	174.167	-0.251939	0.232251	-1.08477	0.278023	0.454662	RNF19B
NM_001300829.2	345.332	-0.295661	0.12323	-2.39926	0.0164282	0.0530128	3995.15	-1.42776	0.107941	-13.2273	6.10645275542096e-40	5.30505952267345e-38	1262.05	1.12454	0.170476	6.59645	4.21109489692811e-11	4.43849402136222e-09	CIRBP
NM_001300860.2	797.9	0.0636993	0.0893436	0.712969	0.475865	0.628696	1690.66	0.43225	0.0868833	4.97506	6.52265000933334e-07	3.16444281109108e-06	1283.67	-0.377838	0.113263	-3.33593	0.000850149	0.00617438	DDX46
NM_001300862.2	38.6281	0.0385804	0.288454	0.133749	0.893601	0.941262	506.494	-0.563595	0.121097	-4.65407	3.25453137864422e-06	1.3726694658576e-05	154.151	0.615594	0.257927	2.3867	0.0170003	0.062553	MPND
NM_001300905.2	324.717	0.532608	0.115103	4.62724	3.70573451525886e-06	4.61602055645169e-05	2008.08	0.808102	0.0968949	8.33998	7.43016358658973e-17	1.37010915851623e-15	808.696	-0.285018	0.14288	-1.99481	0.046064	0.131754	BAZ2A
NM_001301043.2	743.573	-0.0528159	0.0879954	-0.600212	0.548365	0.688848	2405.44	-0.103777	0.0764094	-1.35816	0.174412	0.236297	1375.97	0.0412984	0.0986714	0.418544	0.675549	0.793066	CADM1
NM_001301073.2	221.985	0.182318	0.135904	1.34152	0.179751	0.323967	1168.69	0.186339	0.0873065	2.13431	0.0328173	0.0549149	508.432	-0.0152617	0.138716	-0.110021	0.912393	0.948618	CNOT8
NM_001301833.4	170.716	-0.085798	0.145563	-0.589422	0.555579	0.695339	625.22	0.268033	0.100029	2.67955	0.00737222	0.0146109	331.735	-0.363798	0.146696	-2.47994	0.0131405	0.0517022	MEMO1
NM_001302084.2	48.5153	-0.361462	0.258746	-1.39698	0.16242	0.301296	245.983	-0.211802	0.159641	-1.32674	0.184593	0.248097	109.061	-0.160528	0.266402	-0.602578	0.54679	0.697086	C11orf80
NM_001302769.2	80.4747	0.281655	0.211479	1.33184	0.182914	0.328195	602.497	0.330108	0.115686	2.85347	0.00432441	0.00912185	223.099	-0.0792484	0.211035	-0.375523	0.707271	0.817114	PARD3B
NM_001303.4	52.4037	-0.238802	0.257889	-0.925986	0.354453	0.519322	333.714	-0.0839606	0.13697	-0.612985	0.539886	0.612414	132.548	-0.151248	0.253351	-0.596992	0.550513	0.700203	COX10
NM_001303007.2	225.247	0.16974	0.141799	1.19704	0.231291	0.387307	3420.86	-0.511148	0.0930399	-5.49386	3.93250622403367e-08	2.37557203942163e-07	1000.14	0.677654	0.162627	4.16691	3.08759397979141e-05	0.000437556	DDAH2
NM_001303037.2	163.589	0.00779454	0.153304	0.0508437	0.95945	0.978834	555.72	0.573104	0.108239	5.29479	1.19153560338395e-07	6.56708340727045e-07	308.531	-0.580364	0.161708	-3.58897	0.00033199	0.00297169	PALS2
NM_001303143.2	159.296	-0.211304	0.155182	-1.36166	0.173305	0.316133	422.983	0.148881	0.115797	1.28571	0.198545	0.263902	274.764	-0.368619	0.165405	-2.22858	0.0258417	0.0859893	HAUS3
NM_001303256.3	205.019	0.527504	0.144562	3.64897	0.000263293	0.00185029	920.5	0.283301	0.0976847	2.90016	0.00372978	0.00800581	435.083	0.238045	0.156056	1.52539	0.127163	0.269407	MORC2
NM_001303264.2	207.876	0.76647	0.140422	5.45833	4.80627576436923e-08	9.00696078242793e-07	1758.23	0.720914	0.143557	5.02178	5.11935119283847e-07	2.5213777032174e-06	620.222	0.0346966	0.218946	0.158471	0.874086	0.925551	TSC22D2
NM_001303426.2	108.643	-0.225169	0.181609	-1.23986	0.215028	0.367517	634.574	0.161636	0.109788	1.47225	0.140954	0.196985	262.402	-0.397267	0.184084	-2.15808	0.0309218	0.0982414	ZNF639
NM_001303457.2	392.779	-0.244394	0.113073	-2.16138	0.0306656	0.0871305	1015.71	-0.251924	0.0904932	-2.7839	0.00537098	0.0110727	671.487	-0.00119521	0.125959	-0.0094889	0.992429	0.995262	TTI1
NM_001303512.2	113.88	-0.103226	0.182223	-0.566484	0.571065	0.709038	4228.95	-0.396855	0.0738802	-5.3716	7.8043105058493e-08	4.43388634338836e-07	1047.33	0.294282	0.15581	1.88872	0.0589293	0.155668	PDZD4
NM_001304.5	2471.18	-0.546145	0.0815555	-6.6966	2.13317883834947e-11	7.49545714325044e-10	4378.99	-0.150986	0.0711276	-2.12275	0.0337751	0.0562718	3789.57	-0.402708	0.100683	-3.99975	6.34094692632895e-05	0.000792102	CPD
NM_001304274.2	83.3863	-0.581794	0.211244	-2.75413	0.00588479	0.0232988	96.0128	-0.171236	0.227007	-0.754319	0.450658	0.528559	116.692	-0.423081	0.266792	-1.58581	0.112782	0.247072	IMMP1L
NM_001304504.2	177.802	-0.258776	0.156787	-1.65049	0.098842	0.209641	1261.49	-0.270275	0.0960476	-2.81397	0.00489332	0.0101767	477.761	0.0111908	0.171008	0.06544	0.947824	0.969254	HMG20A
NM_001304533.3	101.226	-0.0088598	0.184233	-0.0480902	0.961644	0.980006	1200.5	0.378794	0.115781	3.27164	0.00106927	0.00261559	376.572	-0.390959	0.199643	-1.95829	0.0501958	0.139411	NKAIN3
NM_001304808.3	144.115	0.284231	0.154897	1.83497	0.0665105	0.155436	1822.36	0.172781	0.0751207	2.30004	0.0214457	0.0376584	560.685	0.100826	0.137365	0.733995	0.462951	0.631345	BRD1
NM_001305203.2	83.9047	-1.64402	0.221324	-7.42812	1.1014963306266e-13	5.30795346067093e-12	783.774	-1.03404	0.100068	-10.3334	4.97559625263637e-25	1.75436609292748e-23	266.223	-0.61392	0.206045	-2.97954	0.00288686	0.0159306	ZFP90
NM_001306089.2	41.2648	0.360937	0.278639	1.29536	0.195197	0.343725	480.381	0.180796	0.137001	1.31968	0.186943	0.250576	151.557	0.17882	0.268656	0.66561	0.505661	0.665576	ZNF236
NM_001306144.3	120.371	-0.112544	0.173694	-0.647943	0.517022	0.663225	653.992	0.169979	0.103156	1.64779	0.0993965	0.145596	280.105	-0.288239	0.171083	-1.68479	0.0920296	0.214245	MTMR1
NM_001306158.2	69.3679	-0.379259	0.223236	-1.69891	0.0893356	0.194769	266.928	-0.646568	0.151837	-4.25831	2.05975995542807e-05	7.38306981896741e-05	137.542	0.267024	0.238519	1.11951	0.262922	0.439126	RABL2A
NM_001306215.2	186.359	0.719825	0.170816	4.21404	2.50837923745858e-05	0.00024175	2579.62	0.552955	0.234774	2.35526	0.0185098	0.033019	773.448	0.172281	0.335237	0.513908	0.607316	0.74529	ZNF827
NM_001308027.2	60.7824	0.266526	0.234385	1.13713	0.255486	0.414568	550.051	-0.380575	0.123981	-3.06962	0.00214335	0.00487371	189.067	0.618025	0.231589	2.66862	0.0076163	0.0341365	MSANTD2
NM_001308068.2	35.4829	0.265047	0.297412	0.891179	0.372833	0.536444	762.066	-0.192205	0.110437	-1.74041	0.0817878	0.12229	205.964	0.450584	0.255109	1.76625	0.0773546	0.189307	FLYWCH1
NM_001308120.2	87.3245	-0.141612	0.196856	-0.719365	0.471916	0.625045	366.653	0.0862946	0.119701	0.720916	0.470961	0.546967	179.817	-0.239915	0.191455	-1.25312	0.210163	0.376961	TOGARAM1
NM_001308142.2	167.193	0.535451	0.145792	3.67272	0.000239986	0.00171509	726.725	0.573909	0.0988144	5.80795	6.32424358948772e-09	4.31883312225389e-08	349.711	-0.0446478	0.148152	-0.301365	0.763136	0.854437	MRTFB
NM_001308147.2	64.5201	-0.0156496	0.225671	-0.0693472	0.944713	0.969223	847.258	-0.523943	0.104067	-5.03468	4.7863629137944e-07	2.37682264434564e-06	257.706	0.498889	0.2057	2.42533	0.0152946	0.0580136	PLEKHG3
NM_001308195.2	93.2074	0.148525	0.189306	0.784573	0.432704	0.591918	474.477	0.238635	0.132269	1.80416	0.0712063	0.108489	209.964	-0.103155	0.209082	-0.493373	0.621749	0.753995	SIMC1
NM_001308319.2	335.89	0.507656	0.112562	4.51002	6.48214941287119e-06	7.47797072486221e-05	1269.31	0.152315	0.0982698	1.54997	0.121149	0.172774	661.11	0.34734	0.136491	2.54478	0.0109348	0.0448235	CHD9
NM_001312.4	168.225	0.599543	0.169323	3.54082	0.000398881	0.00260281	3769.82	0.0760981	0.0778736	0.977201	0.32847	0.405325	1010.53	0.488554	0.16533	2.95503	0.00312638	0.0168985	CRIP2
NM_001312653.2	1327.51	0.591465	0.188052	3.14522	0.00165961	0.00859674	302.349	-0.0806591	0.138725	-0.581431	0.56095	0.633153	1591.24	0.662352	0.186215	3.55692	0.000375233	0.00327872	H2BC12
NM_001312673.2	155.889	-0.135222	0.154825	-0.873384	0.382454	0.544435	1424.98	-0.152229	0.0836648	-1.81951	0.0688341	0.105486	487.986	0.0150456	0.146289	0.102849	0.918083	0.952187	PCYT1A
NM_001313998.2	118.98	-0.380343	0.178264	-2.1336	0.0328758	0.0917108	889.997	-0.293204	0.0947007	-3.09611	0.00196076	0.00449737	329.597	-0.0829742	0.171024	-0.485162	0.627561	0.758	BECN1
NM_001314025.2	60.1322	0.0825168	0.247069	0.333982	0.738393	0.834701	249.118	-0.207577	0.148069	-1.40189	0.160948	0.220574	123.135	0.253985	0.255543	0.993907	0.320268	0.498523	YBEY
NM_001316.4	4649.66	-0.333848	0.0740746	-4.50691	6.5777146064176e-06	7.57785072075405e-05	4295.18	0.260601	0.0783233	3.32724	0.000877098	0.00219382	6275.86	-0.602847	0.102381	-5.88829	3.90206239692267e-09	2.40161971758043e-07	CSE1L
NM_001316979.2	35.9137	0.155615	0.299978	0.518755	0.603932	0.732815	594.699	-0.436924	0.120476	-3.62666	0.00028711	0.000799299	170.154	0.586326	0.262676	2.23213	0.0256067	0.0855111	ZBTB45
NM_001317162.2	192.272	0.447672	0.160292	2.79285	0.00522455	0.0211954	5004.51	0.149163	0.0702272	2.12401	0.0336694	0.0561401	1305.74	0.293998	0.150811	1.94945	0.0512422	0.141247	PLAGL1
NM_001317782.2	2059	0.322756	0.0869375	3.7125	0.000205221	0.00149321	25849.2	-0.624387	0.0950493	-6.56909	5.06250722832816e-11	4.62708768038193e-10	7966.92	0.939373	0.140048	6.7075	1.97992418762977e-11	2.28694804795812e-09	RPL8
NM_001317785.2	67.5382	-0.226765	0.226212	-1.00245	0.316128	0.481036	177.248	-0.582045	0.180407	-3.2263	0.00125403	0.00302281	116.02	0.348377	0.258795	1.34615	0.178254	0.336853	STYXL1
NM_001317950.2	34.9331	0.216288	0.294089	0.735453	0.462064	0.618211	456.42	-0.331916	0.144063	-2.30397	0.0212245	0.0373069	139.048	0.538507	0.282549	1.90589	0.0566645	0.151681	AKNA
NM_001318042.2	140.488	-0.266765	0.163697	-1.62963	0.103179	0.215959	2294.41	0.325596	0.0859503	3.78819	0.000151748	0.000452346	658.927	-0.600499	0.159429	-3.76656	0.00016551	0.00167426	ZNF618
NM_001318252.2	88.0011	-0.201989	0.202442	-0.997764	0.318394	0.483264	3294.11	-1.20278	0.0904736	-13.2942	2.49992748792796e-40	2.21756725692304e-38	814.614	0.992105	0.186839	5.30994	1.09660034678074e-07	4.0202322278501e-06	C7orf50
NM_001318510.2	398.939	1.32651	0.134372	9.87192	5.50976837109861e-23	6.54420798217952e-21	1141.26	1.88666	0.259556	7.2688	3.6269059745092e-13	4.39768872621425e-12	706.08	-0.549571	0.315944	-1.73946	0.0819544	0.197158	ACSL4
NM_001318734.2	67.3079	0.851033	0.22015	3.8657	0.00011077	0.000881535	1121.53	0.310907	0.10083	3.08349	0.00204587	0.00467233	320.506	0.516583	0.202969	2.54513	0.0109237	0.0447999	KLC2
NM_001318852.2	171.268	-0.0906852	0.157505	-0.57576	0.564777	0.703673	2326.91	0.0280479	0.0801397	0.349987	0.726348	0.77944	701.317	-0.124728	0.153833	-0.810802	0.417479	0.589547	MAPK8IP3
NM_001318891.2	81.2489	-0.744231	0.205265	-3.6257	0.000288177	0.0019903	187.998	-0.42817	0.161546	-2.65046	0.00803828	0.0157568	134.136	-0.328679	0.221227	-1.48571	0.137355	0.282966	ZNF184
NM_001318895.3	97.3785	-0.178477	0.230614	-0.773921	0.438978	0.597852	496.609	-0.24775	0.143717	-1.72388	0.0847301	0.126085	219.55	0.0475019	0.278144	0.170781	0.864396	0.920218	FHL2
NM_001318939.2	46.4863	-0.437255	0.261259	-1.67365	0.0941998	0.202134	125.551	-0.295693	0.199032	-1.48566	0.137369	0.19255	80.6513	-0.15043	0.28255	-0.532402	0.594448	0.735452	EEF1AKMT1
NM_001319.7	68.3092	0.526107	0.237986	2.21066	0.0270593	0.0787408	4411.96	0.41442	0.0690477	6.00194	1.94976071802605e-09	1.44254904045702e-08	1035.13	0.142064	0.181741	0.781685	0.4344	0.605312	CSNK1G2
NM_001319206.4	81.47	0.609668	0.212243	2.8725	0.00407241	0.0174861	687.241	0.405253	0.124702	3.24977	0.00115498	0.00280572	242.638	0.184459	0.224809	0.820514	0.411923	0.584639	MEF2A
NM_001319236.2	2088.23	0.299217	0.0847802	3.52933	0.000416618	0.00269428	9124.6	-0.324152	0.10512	-3.08365	0.00204479	0.00467231	4377.48	0.61771	0.149996	4.11818	3.81877790155552e-05	0.000524978	RPL34
NM_001319674.2	59.88	0.789861	0.23365	3.38053	0.000723455	0.00428735	365.825	0.459244	0.134984	3.40222	0.00066842	0.00171731	148.13	0.332238	0.233988	1.41989	0.155639	0.307413	GMEB1
NM_001319944.2	115.45	0.0332158	0.173491	0.191456	0.848169	0.910812	694.642	-0.205006	0.109185	-1.8776	0.0604357	0.0941564	283.18	0.238908	0.177438	1.34643	0.178163	0.336831	CEP85
NM_001319999.2	712.684	0.566267	0.0932701	6.07125	1.26916365824686e-09	3.21407121020894e-08	1742.63	0.372238	0.0800243	4.65157	3.29421088281982e-06	1.38593685020083e-05	1196.88	0.182897	0.10877	1.6815	0.0926661	0.215488	RACGAP1
NM_001320.7	867.855	-0.0998715	0.0869845	-1.14815	0.250905	0.409183	2816.3	-0.00513817	0.0773393	-0.0664368	0.94703	0.959671	1607.89	-0.100971	0.102461	-0.985461	0.324398	0.502354	CSNK2B
NM_001320047.2	154.281	0.0546014	0.154673	0.353011	0.72408	0.824378	313.858	0.292804	0.130846	2.23777	0.0252359	0.0434716	245.401	-0.24551	0.174624	-1.40593	0.159744	0.312521	C1orf112
NM_001320214.2	984.091	-1.09551	0.100949	-10.8522	1.94746144994926e-27	2.98598952862219e-25	4443.83	-0.869463	0.0851887	-10.2063	1.85771418597697e-24	6.33803945150928e-23	2094.16	-0.234977	0.136641	-1.71967	0.0854932	0.203753	SRSF5
NM_001320643.3	79.4037	0.862649	0.203866	4.23146	2.32182706507105e-05	0.00022662	1112.49	0.622386	0.0941429	6.61107	3.81541883558779e-11	3.56259823795332e-10	332.504	0.225531	0.185892	1.21323	0.225041	0.396561	SIK1B
NM_001320646.2	712.424	0.313222	0.107179	2.92242	0.00347328	0.0155056	1388.06	-0.492859	0.655904	-0.75142	0.4524	0.530306	1119.36	0.802744	0.665325	1.20654	0.227608	0.398958	U2AF1L5
NM_001320669.3	99.9806	-1.74777	0.219252	-7.97153	1.56717726838342e-15	9.37305383282085e-14	311.188	-1.36763	0.144699	-9.45153	3.33926437852486e-21	9.10678994104498e-20	182.35	-0.380938	0.242882	-1.56841	0.116786	0.252822	ZFP30
NM_001320714.2	216.408	-0.0814487	0.137787	-0.591119	0.554441	0.694327	621.026	0.047509	0.115068	0.412879	0.679695	0.74012	383.31	-0.140912	0.164728	-0.855424	0.392316	0.565762	DOP1B
NM_001320835.1	86.0524	0.348445	0.202173	1.7235	0.0847977	0.187395	222.141	0.586881	0.186386	3.14874	0.00163979	0.00383527	147.039	-0.248229	0.262819	-0.944487	0.344921	0.521265	DENND4A
NM_001320848.2	81.9382	-0.268491	0.207792	-1.29211	0.196319	0.345017	241.737	-0.603082	0.145591	-4.14231	3.43825945705803e-05	0.0001174	146.564	0.311864	0.217451	1.43418	0.15152	0.301608	FAHD2B
NM_001320925.4	80.8201	0.516055	0.204171	2.52757	0.0114855	0.0400071	876.874	-0.205056	0.139222	-1.47287	0.140787	0.196849	282.913	0.71091	0.23821	2.98439	0.00284147	0.0157627	NAA38
NM_001320973.2	121.976	0.133909	0.182349	0.734356	0.462732	0.618402	361.692	-0.0499389	0.146842	-0.340085	0.733792	0.786526	218.525	0.179624	0.224179	0.801256	0.422983	0.594234	BLZF1
NM_001321.3	1408.98	-0.0629154	0.0784201	-0.802287	0.422387	0.582596	6006.14	-0.301137	0.0886432	-3.39718	0.000680847	0.00174339	2920.91	0.229776	0.117644	1.95314	0.0508031	0.140496	CSRP2
NM_001321075.3	31.8618	0.552993	0.32407	1.7064	0.0879334	0.192809	890.425	-0.157779	0.10491	-1.50395	0.132595	0.186853	229.62	0.745403	0.264445	2.81875	0.00482112	0.0238147	DLG4
NM_001321092.3	394.448	0.139195	0.111871	1.24424	0.21341	0.365419	2784.26	-0.124948	0.0709559	-1.76093	0.0782507	0.117753	1056.76	0.265351	0.113121	2.34573	0.0189898	0.0678769	GPS1
NM_001321103.2	422.435	0.666346	0.112895	5.90237	3.5830806116269e-09	8.46389882292706e-08	1415.27	0.597178	0.256278	2.3302	0.0197956	0.0350236	792.254	0.0645121	0.21759	0.296485	0.766859	0.856558	SLC4A7
NM_001321154.2	77.5629	-0.285413	0.209596	-1.36173	0.173284	0.316133	388.342	-0.108436	0.126357	-0.858166	0.390801	0.469395	173.299	-0.187167	0.210739	-0.888146	0.374462	0.548552	METTL8
NM_001321209.2	172.799	-0.15326	0.146374	-1.04704	0.295081	0.457346	639.244	-0.312298	0.120349	-2.59494	0.00946072	0.0182434	337.11	0.151372	0.174615	0.866889	0.386003	0.559913	DPY30
NM_001321324.2	76.4118	-0.322495	0.209721	-1.53774	0.124113	0.246501	630.258	-0.624406	0.10733	-5.81761	5.96934919208922e-09	4.09305985693538e-08	224.394	0.292117	0.199739	1.4625	0.143605	0.291357	MOV10
NM_001321571.2	762.241	-0.311987	0.0977163	-3.19279	0.00140907	0.00753498	2033	-0.0613085	0.081091	-0.756046	0.449622	0.527564	1316.74	-0.255441	0.118085	-2.16319	0.0305265	0.0973523	CAMK2D
NM_001321759.2	56.1897	-0.237596	0.277616	-0.855845	0.392083	0.553707	303.752	0.0175171	0.137575	0.127327	0.898681	0.922098	130.412	-0.238743	0.286082	-0.834527	0.403984	0.577169	CDIN1
NM_001321967.2	416.72	-0.0484744	0.103968	-0.466245	0.64104	0.76279	1353.93	0.0276652	0.0789207	0.350544	0.72593	0.77909	772.42	-0.0880774	0.1061	-0.830136	0.406462	0.579392	ATAD1
NM_001322101.2	78.7212	0.302312	0.207507	1.45687	0.145152	0.277944	1537.24	0.299354	0.0813479	3.67992	0.000233309	0.000666925	423.721	0.0213003	0.172692	0.123342	0.901836	0.942641	CENPO
NM_001322131.2	133.615	-1.46614	0.205464	-7.13572	9.628184794848e-13	4.27339380920806e-11	532.068	-1.69536	0.114001	-14.8715	5.04880129009562e-50	5.99242936220222e-48	268.746	0.235486	0.227768	1.03388	0.301191	0.47963	ZNF160
NM_001322374.2	178.894	-0.403821	0.155903	-2.5902	0.00959211	0.0344948	1349.09	-0.26352	0.123356	-2.13625	0.032659	0.0546826	497.964	-0.148236	0.202226	-0.733022	0.463545	0.631602	CEBPZOS
NM_001322917.1	56.1826	-0.951576	0.249981	-3.80659	0.000140895	0.00107429	148.769	0.100557	0.201602	0.498787	0.617929	0.684719	96.8271	-1.06364	0.290208	-3.6651	0.000247242	0.00233193	ZNF567
NM_001322934.2	44.9551	0.15836	0.262141	0.604101	0.545777	0.687123	286.534	0.124522	0.153745	0.809921	0.417986	0.496598	113.773	0.0175663	0.265507	0.0661612	0.947249	0.968851	NFKB2
NM_001323043.2	91.0537	0.187578	0.195422	0.959859	0.337126	0.501084	682.177	0.291161	0.100512	2.89677	0.00377023	0.00808648	252.529	-0.120591	0.182476	-0.660859	0.508703	0.667712	PHTF1
NM_001323329.2	134.007	0.075322	0.159899	0.471059	0.637599	0.759767	842.976	0.469661	0.106916	4.39281	1.11895726335726e-05	4.2379563408142e-05	336.782	-0.400588	0.170269	-2.35268	0.0186388	0.0668775	MAPK8
NM_001323342.2	900.638	0.309637	0.0895886	3.45621	0.000547825	0.0034074	1668.74	0.689048	0.0983978	7.00267	2.51122636144896e-12	2.73412203461633e-11	1397.01	-0.386954	0.130835	-2.95756	0.00310082	0.0168034	AHCTF1
NM_001323682.2	45.2033	-0.115602	0.271036	-0.426518	0.66973	0.78366	1444.48	-0.337462	0.090259	-3.73882	0.000184882	0.000538915	364.996	0.255051	0.221294	1.15254	0.249097	0.422954	NRSN2
NM_001324.3	258.8	-0.370805	0.141048	-2.62892	0.00856564	0.0316384	612.742	-0.635925	0.104327	-6.09547	1.09114334510872e-09	8.33641429667376e-09	430.153	0.269529	0.158452	1.70102	0.0889397	0.20917	CSTF1
NM_001324242.2	43.0165	0.659058	0.272759	2.41627	0.0156806	0.0511743	315.923	0.191752	0.138144	1.38805	0.16512	0.225522	117.899	0.453316	0.256949	1.76423	0.0776937	0.189789	RBM41
NM_001324445.2	38.8489	-0.112471	0.290203	-0.38756	0.698341	0.805845	752.495	-0.338185	0.0994889	-3.39922	0.000675783	0.00173306	207.686	0.261529	0.234385	1.11581	0.264504	0.440509	ADAT1
NM_001325.3	164.337	-0.096919	0.15335	-0.63201	0.52738	0.673032	524.652	-0.107626	0.115617	-0.930883	0.351914	0.429607	302.622	-0.000589472	0.172788	-0.00341153	0.997278	0.998422	CSTF2
NM_001326.3	481.921	0.205073	0.105228	1.94885	0.0513131	0.127722	910.311	0.18516	0.0923419	2.00516	0.0449461	0.0722412	751.237	0.00597663	0.123358	0.0484497	0.961358	0.97744	CSTF3
NM_001326342.2	407.146	-0.129142	0.111498	-1.15825	0.246764	0.405013	3199.69	0.180316	0.0673473	2.67741	0.00741948	0.0146977	1161.59	-0.319734	0.109236	-2.92701	0.00342239	0.0182182	CELF2
NM_001329214.4	91.2458	-0.320886	0.192401	-1.6678	0.0953548	0.203948	170.211	-0.0470018	0.16679	-0.281802	0.778095	0.823538	141.752	-0.283254	0.212838	-1.33084	0.183241	0.343811	MIA2
NM_001329630.2	60.5009	0.513866	0.241497	2.12784	0.0333505	0.092761	403.208	1.29096	0.121145	10.6563	1.62957655078481e-26	6.57054621696824e-25	157.019	-0.816842	0.223743	-3.6508	0.000261424	0.00244112	PLEKHA7
NM_001329686.2	59.7907	-0.69384	0.240574	-2.8841	0.00392539	0.0170282	581.912	-0.938562	0.105348	-8.90918	5.14115129356842e-19	1.19023302062915e-17	194.8	0.227756	0.216097	1.05395	0.291906	0.469813	OARD1
NM_001329752.2	105.9	0.458445	0.198947	2.30436	0.0212023	0.0651839	1463.95	-0.407251	0.0934503	-4.35794	1.31289415651864e-05	4.89980471965569e-05	438.89	0.83265	0.194603	4.27872	1.87972794890467e-05	0.00028976	FAM136A
NM_001329943.3	362.699	-0.0478364	0.116201	-0.411669	0.680582	0.791088	452.691	0.316375	0.134166	2.3581	0.018369	0.0328095	515.08	-0.3744	0.166858	-2.24382	0.0248437	0.0835589	KIAA0586
NM_001329984.2	405.769	0.200581	0.12405	1.61694	0.105891	0.220103	3274.01	0.561441	0.08138	6.89901	5.23660346059717e-12	5.38813887209431e-11	1176.21	-0.367279	0.144524	-2.5413	0.0110441	0.0451619	SRGAP2C
NM_001330059.2	154.743	0.342459	0.171853	1.99274	0.0462896	0.118054	1564.55	0.615461	0.0999101	6.16015	7.26777680325265e-10	5.68668106973167e-09	517.164	-0.270057	0.191142	-1.41286	0.157697	0.309809	ZDHHC20
NM_001330063.2	396.62	-0.0450254	0.109644	-0.410653	0.681327	0.791631	1821.73	0.168429	0.0893541	1.88496	0.0594354	0.0928382	850.69	-0.220557	0.128819	-1.71214	0.0868702	0.205698	ANKFY1
NM_001330071.2	198.515	0.0681325	0.152334	0.447258	0.654689	0.772804	462.818	0.109879	0.130042	0.844947	0.39814	0.476784	328.457	-0.0515389	0.193081	-0.266929	0.789524	0.872929	DCLK1
NM_001330074.2	474.746	-0.310745	0.103866	-2.99177	0.00277361	0.0130088	722.134	0.118203	0.100875	1.17177	0.241288	0.312149	702.249	-0.440291	0.126623	-3.47718	0.000506714	0.00409254	WASHC2C
NM_001330078.2	75.2268	-0.539492	0.213423	-2.52781	0.0114777	0.0399965	304.848	0.398026	0.16263	2.44743	0.0143879	0.02645	152.582	-0.942398	0.251782	-3.74291	0.000181903	0.00180448	NRXN1
NM_001330103.2	141.98	-0.745555	0.169479	-4.3991	1.08699303331427e-05	0.000117209	442.712	-0.570807	0.116227	-4.91112	9.05579891120412e-07	4.26569130378519e-06	259.099	-0.190184	0.17948	-1.05964	0.289308	0.466986	RUFY2
NM_001330112.2	99.9847	-0.548569	0.19541	-2.80727	0.00499629	0.020523	734.821	-0.16487	0.106149	-1.5532	0.120376	0.171846	274.193	-0.385004	0.193813	-1.98647	0.046981	0.133652	SHLD2
NM_001330145.2	107.469	0.37083	0.179621	2.06451	0.0389696	0.104014	514.321	0.340395	0.124667	2.73043	0.00632508	0.0127729	234.99	0.0135819	0.19619	0.0692284	0.944808	0.967211	RIC8B
NM_001330177.2	192.329	-0.7142	0.158202	-4.51448	6.34708179206942e-06	7.34224152983833e-05	1602.18	-0.0298924	0.0844841	-0.353823	0.723471	0.777303	568.378	-0.690881	0.162251	-4.25809	2.06178641447883e-05	0.000309341	PCNX4
NM_001330195.2	38.8578	1.01187	0.303232	3.33696	0.000847005	0.00488229	252.637	0.46274	0.178633	2.59046	0.00958487	0.0184368	99.4301	0.522334	0.324252	1.61089	0.107204	0.239013	NRXN3
NM_001330218.2	71.3773	-1.03572	0.2382	-4.34812	1.37310390685824e-05	0.000143999	796.3	-0.318532	0.0915841	-3.47802	0.000505126	0.00133105	254.566	-0.723328	0.206968	-3.49487	0.000474285	0.00390544	CCNYL1
NM_001330239.4	907.354	-0.00276919	0.087517	-0.0316417	0.974758	0.987048	1595.25	0.57723	0.0873508	6.60818	3.89070846314878e-11	3.6228729523707e-10	1388.87	-0.587879	0.112633	-5.21943	1.79473644125435e-07	6.02917038751262e-06	TJP1
NM_001330288.2	596.202	0.147555	0.0968702	1.52322	0.127703	0.25197	2454.29	0.215325	0.0749718	2.87208	0.00407778	0.00865142	1217.25	-0.0730257	0.106616	-0.684942	0.49338	0.655652	SMARCC2
NM_001330301.2	266.536	-0.00970398	0.135692	-0.0715147	0.942988	0.968602	891.271	0.318319	0.108235	2.941	0.00327151	0.00712193	499.54	-0.333129	0.167489	-1.98896	0.0467056	0.133093	SAP130
NM_001330311.2	40.8339	0.476527	0.327979	1.45292	0.146245	0.279657	1104.12	0.271231	0.0937665	2.89262	0.00382042	0.00817682	286.3	0.2475	0.261778	0.945458	0.344425	0.521212	DVL1
NM_001330360.2	576.437	-0.000528153	0.0968716	-0.0054521	0.99565	0.998967	806.221	0.303536	0.10055	3.01877	0.00253805	0.00567156	837.368	-0.311838	0.122898	-2.53737	0.0111689	0.0455397	POLA1
NM_001330442.2	287.725	-0.101882	0.120689	-0.84417	0.398574	0.56029	934.279	0.214388	0.0970695	2.20861	0.027202	0.0465634	533.248	-0.320889	0.137676	-2.33075	0.0197664	0.0701181	MTA3
NM_001330564.2	554.139	0.141768	0.0985303	1.43882	0.150201	0.284724	1615.38	0.00907092	0.0865224	0.104839	0.916504	0.935645	987.044	0.123797	0.118399	1.04559	0.295752	0.473563	ZC3H13
NM_001330574.2	208.577	0.404333	0.143901	2.8098	0.00495722	0.0203824	849.324	0.686889	0.0981344	6.99947	2.56938915067534e-12	2.79383772551498e-11	423.93	-0.303291	0.156981	-1.93203	0.0533562	0.145504	ZNF711
NM_001330588.2	760.349	-0.174616	0.0904651	-1.9302	0.0535817	0.131951	755.534	0.201521	0.106938	1.88447	0.059501	0.0929235	1037.77	-0.384368	0.124693	-3.08253	0.0020525	0.0123092	TPP2
NM_001330640.2	291.709	0.0763444	0.121117	0.630337	0.528474	0.67402	627.404	0.155324	0.105781	1.46836	0.142007	0.198161	471.255	-0.0859462	0.139239	-0.617256	0.537066	0.690088	DENND4C
NM_001330668.2	191.876	-0.309457	0.15659	-1.97622	0.0481295	0.121593	323.213	-0.0947111	0.138444	-0.68411	0.493906	0.568521	290.593	-0.227289	0.195509	-1.16255	0.245013	0.41804	CBWD5
NM_001330672.2	764.855	0.379435	0.0927443	4.09119	4.29156980728462e-05	0.000390408	4362.67	0.509851	0.0734424	6.94218	3.86092580778181e-12	4.05180844111797e-11	1824.92	-0.14173	0.10692	-1.32556	0.184984	0.346081	LIMCH1
NM_001330691.3	334.281	-0.52966	0.114429	-4.62874	3.67896523303141e-06	4.58945470564406e-05	1179.27	0.115249	0.095675	1.20459	0.228363	0.297667	639.931	-0.655603	0.135617	-4.83424	1.33657563092571e-06	3.36418081193002e-05	CEP78
NM_001330700.2	2929.72	-0.196795	0.0745571	-2.63952	0.00830227	0.0308564	4902.32	0.65925	0.0815921	8.07982	6.48605508848573e-16	1.10420174203372e-14	4430.58	-0.864745	0.105919	-8.16423	3.23481731579127e-16	8.98588665696308e-14	TOP2B
NM_001330701.2	472.397	-0.29074	0.102424	-2.83859	0.00453134	0.0189984	1396.01	0.225232	0.0961897	2.34154	0.0192044	0.0340922	845.627	-0.524594	0.1302	-4.02913	5.59830591045197e-05	0.000710917	AGTPBP1
NM_001330707.2	125.911	-0.485089	0.17363	-2.7938	0.00520925	0.0211607	613.633	-0.294351	0.104105	-2.82745	0.00469209	0.00980904	277.684	-0.208683	0.174989	-1.19255	0.233046	0.404663	ZNF131
NM_001330723.2	297.157	0.0044389	0.121089	0.0366583	0.970757	0.985482	1485.44	0.0549064	0.0782294	0.701865	0.482763	0.558124	663.486	-0.0600277	0.120393	-0.498598	0.618063	0.751944	SNX27
NM_001330736.2	182.478	-0.34134	0.144973	-2.35451	0.018547	0.0584044	1239.85	-1.01369	0.0917974	-11.0426	2.37925584985409e-28	1.10164774981981e-26	478.288	0.655205	0.14913	4.39352	1.11530907351353e-05	0.000188841	ZNF518A
NM_001330988.2	105.293	1.40166	0.203792	6.87788	6.07514848348782e-12	2.40524540663159e-10	1317.37	1.02725	0.0950492	10.8076	3.16832676710776e-27	1.33497448332085e-25	406.742	0.354805	0.197888	1.79295	0.0729805	0.181633	SLC25A25
NM_001331036.3	127.155	-0.483498	0.16738	-2.88863	0.00386924	0.0168192	546.87	-0.0363731	0.115299	-0.315467	0.752407	0.80199	264.683	-0.460951	0.178241	-2.58611	0.00970653	0.0411284	ELF2
NM_001332.4	315.166	0.410475	0.137198	2.99186	0.00277288	0.0130088	2432.31	0.48712	0.0745515	6.53401	6.40329929351646e-11	5.77736650390398e-10	889.566	-0.0876965	0.148342	-0.591176	0.554402	0.703298	CTNND2
NM_001333.4	143.86	-0.113051	0.170898	-0.661508	0.508287	0.65511	245.71	-0.262903	0.166437	-1.5796	0.114199	0.164001	218.597	0.139165	0.225565	0.616961	0.53726	0.690088	CTSV
NM_001334.3	59.1225	-0.614226	0.234663	-2.61748	0.00885815	0.0325352	284.524	-0.666302	0.135492	-4.91766	8.75860548963069e-07	4.13958320028704e-06	129.6	0.0497637	0.226807	0.219409	0.826331	0.895134	CTSO
NM_001336.4	42.7206	-0.0572315	0.273852	-0.208987	0.834459	0.902409	507.178	-0.0124485	0.108638	-0.114587	0.908773	0.929622	159.046	-0.0753512	0.234473	-0.321364	0.747935	0.84441	CTSZ
NM_001338.5	211.912	0.254377	0.136933	1.85768	0.0632148	0.149392	1861.62	0.19419	0.0878007	2.21171	0.0269867	0.0462323	647.062	0.0505505	0.143831	0.351458	0.725245	0.829666	CXADR
NM_001343.4	70.6072	-0.757667	0.242294	-3.12706	0.00176564	0.00904047	251.381	-0.460175	0.174319	-2.63984	0.00829462	0.0162028	135.641	-0.294589	0.289646	-1.01707	0.309122	0.488021	DAB2
NM_001344.4	321.051	0.0754171	0.138272	0.545424	0.585462	0.720654	2877.33	-0.235399	0.0918836	-2.56193	0.0104093	0.0198056	992.456	0.307083	0.167735	1.83076	0.0671356	0.171075	DAD1
NM_001346231.2	195.667	0.11379	0.143976	0.790341	0.429329	0.588866	563.715	-0.147577	0.120029	-1.22951	0.21888	0.287261	346.992	0.251507	0.172703	1.4563	0.145311	0.293234	RELCH
NM_001346249.2	366.942	-0.226331	0.112607	-2.00992	0.0444401	0.114572	589.061	0.355263	0.124439	2.85492	0.00430483	0.00909193	549.485	-0.59001	0.157143	-3.7546	0.000173621	0.00173869	RALGAPA1
NM_001346311.2	143.695	-0.202451	0.178491	-1.13424	0.256696	0.41564	1419.95	-0.259529	0.0822252	-3.15632	0.00159772	0.00374728	472.827	0.0757485	0.171428	0.441867	0.658585	0.780127	ATG13
NM_001346516.2	164.461	0.275478	0.153785	1.79132	0.0732426	0.166799	763.463	0.450622	0.105583	4.26792	1.97300654242817e-05	7.10535304830864e-05	354.498	-0.177476	0.166936	-1.06314	0.287719	0.465652	LCOR
NM_001346754.2	80.5692	-1.09791	0.225727	-4.86388	1.15107920444095e-06	1.60182358598193e-05	631.436	-0.521612	0.112083	-4.65381	3.25860300376625e-06	1.37369922524953e-05	229.43	-0.572827	0.21727	-2.63648	0.00837718	0.0366371	PIGW
NM_001347217.2	69.9998	-0.364562	0.220303	-1.65482	0.0979603	0.208295	1298.85	-0.183949	0.083527	-2.20227	0.0276464	0.0472185	361.929	-0.158087	0.183897	-0.859651	0.389981	0.563938	WDR13
NM_001347702.2	45.8467	-0.131372	0.269369	-0.487704	0.625759	0.750751	183.838	-0.233526	0.165931	-1.40737	0.159317	0.218588	92.5504	0.0787916	0.27297	0.288645	0.772853	0.861313	SYNE1
NM_001347721.2	274.405	0.224333	0.123615	1.81477	0.0695595	0.160887	1787.97	0.39486	0.0831702	4.74761	2.05834420055738e-06	9.08088781069897e-06	702.949	-0.175954	0.128122	-1.37333	0.169649	0.325998	DYRK1A
NM_001348.3	190.419	0.697214	0.154893	4.50128	6.75459230039928e-06	7.74986079853975e-05	2164.86	0.326822	0.087839	3.72069	0.00019868	0.000574958	688.233	0.368605	0.165036	2.23349	0.0255169	0.0852451	DAPK3
NM_001348022.3	111.742	-1.14515	0.190161	-6.022	1.72279705104591e-09	4.29832767203259e-08	271.853	-0.736035	0.144881	-5.08029	3.76863518215921e-07	1.90169393293746e-06	187.347	-0.408701	0.21225	-1.92557	0.0541584	0.147074	ZNF606
NM_001348323.3	1521.29	-0.157555	0.0820288	-1.92072	0.0547668	0.134053	3433.16	0.252956	0.0718084	3.52265	0.000427254	0.00114156	2492.84	-0.418127	0.097521	-4.28756	1.80642824385218e-05	0.000279996	TRIP12
NM_001348716.2	292.133	2.37367	0.156114	15.2047	3.2934642354097e-52	1.20755582161783e-49	4462.82	2.43797	0.125079	19.4915	1.29627985388221e-84	3.21286774372512e-82	1304.49	-0.070475	0.219184	-0.321534	0.747806	0.84441	KDM6B
NM_001348719.2	60.9125	-0.750363	0.235392	-3.18772	0.00143401	0.00764412	166.823	-0.587173	0.195134	-3.00907	0.00262046	0.00583116	106.168	-0.170646	0.277174	-0.615666	0.538115	0.690727	ZNF439
NM_001348768.2	44.4607	0.18946	0.265056	0.714793	0.474737	0.627501	202.231	0.608285	0.170754	3.56234	0.000367559	0.00100046	94.9621	-0.415068	0.275642	-1.50582	0.132113	0.275877	HECW2
NM_001348800.3	53.695	1.59013	0.263652	6.03116	1.62783980897559e-09	4.07346383059085e-08	98.0818	2.6771	0.287357	9.31629	1.20485092112489e-20	3.13372799762946e-19	82.9901	-1.09488	0.370553	-2.95471	0.00312964	0.0169053	ZBTB20
NM_001348957.2	144.657	-0.344836	0.169537	-2.03399	0.0419525	0.109863	314.607	-0.145455	0.145754	-0.997951	0.318303	0.394752	234.446	-0.200549	0.208817	-0.960408	0.33685	0.514551	SMIM26
NM_001349.4	946.313	-0.0921994	0.088831	-1.03792	0.299308	0.462028	1318.76	0.104307	0.0848156	1.22981	0.218769	0.28716	1373.5	-0.20632	0.107602	-1.91744	0.055182	0.149037	DARS1
NM_001349206.2	116.646	0.811224	0.176398	4.59883	4.24880402986685e-06	5.20787273021325e-05	696.283	0.561945	0.102306	5.4928	3.95621195780705e-08	2.386470878199e-07	285.004	0.256765	0.174266	1.47341	0.140642	0.287489	LPIN1
NM_001349232.2	153.635	-0.134551	0.161931	-0.830916	0.406021	0.566767	363.142	-0.348598	0.119905	-2.90728	0.00364587	0.00785226	255.252	0.202396	0.172109	1.17598	0.239604	0.411391	ATG7
NM_001349278.2	200.741	-0.12323	0.140291	-0.878393	0.37973	0.542277	809.947	0.0282118	0.101695	0.277417	0.78146	0.826476	406.308	-0.153988	0.154551	-0.996362	0.319074	0.497216	ANKRD28
NM_001349338.3	144.037	0.436301	0.179282	2.4336	0.0149495	0.0495188	504.093	0.712595	0.111404	6.39647	1.59011051942124e-10	1.36593897524595e-09	274.835	-0.266344	0.195005	-1.36583	0.171991	0.328775	FOXP1
NM_001349723.3	62.9355	0.0249699	0.243713	0.102456	0.918395	0.956623	547.512	-0.190303	0.130249	-1.46107	0.143996	0.200496	190.979	0.22865	0.248965	0.9184	0.35841	0.532812	DNAJB5
NM_001349798.2	54.8879	-0.664205	0.245893	-2.7012	0.006909	0.0265868	431.918	-0.00261728	0.114299	-0.0228985	0.981731	0.986649	156.706	-0.659553	0.221031	-2.98399	0.00284517	0.0157645	FBXW7
NM_001349884.2	80.1399	-0.195715	0.206307	-0.948658	0.342794	0.507066	275.868	-0.0812979	0.136488	-0.595641	0.551415	0.623602	151.894	-0.107532	0.20893	-0.514682	0.606775	0.744921	DRAM2
NM_001350134.2	131.33	0.467293	0.182516	2.56028	0.0104587	0.0369638	336.162	0.679167	0.156664	4.33518	1.45643511975757e-05	5.37834301235628e-05	223.784	-0.221832	0.237687	-0.933296	0.350667	0.526407	ZNF654
NM_001350197.2	139.872	0.257335	0.160018	1.60816	0.1078	0.22298	470.412	0.462386	0.109628	4.21776	2.46746114933167e-05	8.6855869279106e-05	262.717	-0.215106	0.161934	-1.32835	0.184062	0.345044	EVI5
NM_001350599.2	200.184	0.335649	0.142338	2.35811	0.0183682	0.0580145	506.819	0.264669	0.123666	2.1402	0.0323385	0.0542414	339.929	0.0615384	0.173719	0.354241	0.723159	0.828713	MMS22L
NM_001350605.2	588.67	0.371644	0.0961864	3.86379	0.000111641	0.000887344	3475.18	0.103253	0.0923601	1.11794	0.263591	0.337478	1429.77	0.259818	0.130074	1.99746	0.045775	0.131061	SRSF11
NM_001350770.2	38.7052	0.663997	0.284862	2.33094	0.0197563	0.0615401	443.892	0.15156	0.129442	1.17087	0.241649	0.312568	140.686	0.509925	0.259667	1.96376	0.0495578	0.138535	C1orf109
NM_001350814.2	142.03	0.366093	0.157867	2.31899	0.0203955	0.0631639	2565.23	0.442008	0.0806859	5.47813	4.29841822062679e-08	2.56535200745198e-07	719.381	-0.0890192	0.146774	-0.606504	0.54418	0.695231	GRB10
NM_001351015.2	97.2103	-0.883665	0.208022	-4.24793	2.15752196885319e-05	0.000214556	320.263	-1.05516	0.127234	-8.29307	1.10364704100451e-16	2.00440379623814e-15	181.096	0.16402	0.215735	0.760288	0.447082	0.617392	R3HCC1L
NM_001351132.2	58.2308	-0.0642705	0.259904	-0.247285	0.804687	0.881862	513.421	-0.324956	0.109959	-2.95525	0.0031242	0.00683658	178.164	0.288976	0.226319	1.27685	0.201655	0.366613	PEX5
NM_001351169.2	397.618	0.0721259	0.106457	0.677509	0.498083	0.647001	1732.1	-0.348773	0.0803022	-4.34326	1.40384140909904e-05	5.21382615887071e-05	832.283	0.410238	0.111756	3.67083	0.000241766	0.00229311	NT5C2
NM_001351264.2	134.186	-0.0459063	0.16463	-0.278845	0.780364	0.865216	598.246	-0.0598311	0.117913	-0.507415	0.611863	0.679676	283.853	0.0026476	0.182099	0.0145394	0.9884	0.992519	C17orf80
NM_001351365.2	341.294	-0.307343	0.509933	-0.602713	0.5467	0.687697	2139.43	0.261804	0.104336	2.50923	0.0120994	0.0226833	856.01	-0.579302	0.524622	-1.10423	0.269495	0.445914	NBPF19
NM_001351411.2	238.974	-0.105476	0.157373	-0.670231	0.502711	0.650768	1600.85	0.0252429	0.0856605	0.294686	0.768234	0.816279	621.656	-0.126498	0.173986	-0.727061	0.467189	0.63487	LPAR1
NM_001351601.3	54.006	0.50202	0.265013	1.89433	0.0581819	0.140345	277.784	0.589672	0.153563	3.83994	0.000123066	0.000374262	122.285	-0.0979509	0.279027	-0.351045	0.725555	0.829768	INTS6L
NM_001351695.2	293.702	0.156715	0.12471	1.25663	0.208886	0.360057	436.887	-0.198216	0.11137	-1.7798	0.0751086	0.113756	432.252	0.339125	0.142768	2.37536	0.017532	0.0637582	INTS2
NM_001351774.2	71.5624	-1.19867	0.230512	-5.20003	1.99253553203844e-07	3.30118902587037e-06	822.838	-0.831031	0.120085	-6.92033	4.50588757204142e-12	4.68201166086227e-11	260.529	-0.36037	0.233799	-1.54137	0.123227	0.26345	ZNF320
NM_001352027.3	86.4121	-0.000917622	0.20104	-0.00456438	0.996358	0.999098	999.702	0.12855	0.0863002	1.48957	0.136337	0.191231	316.049	-0.129528	0.176736	-0.73289	0.463625	0.631602	PHF21A
NM_001352389.2	133.038	-0.450435	0.168171	-2.67843	0.0073968	0.0280726	515.249	-0.0570662	0.112036	-0.509354	0.610504	0.678365	264.618	-0.393973	0.176237	-2.23547	0.0253863	0.084977	STK33
NM_001352514.2	102.558	-0.418138	0.191106	-2.18799	0.0286704	0.0824898	810.944	-0.178283	0.0948801	-1.87903	0.0602399	0.0939381	293.604	-0.224504	0.178178	-1.26	0.20767	0.374215	HLCS
NM_001352688.2	69.2346	-0.0681128	0.254464	-0.267672	0.788952	0.871672	933.728	-0.429146	0.10512	-4.08243	4.45675212901736e-05	0.000148213	281.958	0.315734	0.245445	1.28637	0.198313	0.362019	SMIM30
NM_001352754.2	155.418	-0.361239	0.15318	-2.35826	0.0183607	0.0580145	499.084	0.153387	0.105783	1.45002	0.147054	0.204089	286.85	-0.521757	0.154832	-3.36981	0.000752192	0.00562277	ARMC9
NM_001353214.3	196.586	-0.244381	0.141863	-1.72265	0.0849523	0.187687	601.448	0.277699	0.113487	2.44696	0.0144066	0.0264785	356.298	-0.527039	0.162663	-3.24007	0.00119502	0.00810001	DYM
NM_001353345.2	90.2114	0.509691	0.200324	2.54433	0.0109487	0.03843	1192.03	0.734592	0.098412	7.46445	8.36454861193166e-14	1.09965758428624e-12	362.229	-0.240455	0.191207	-1.25756	0.208549	0.374944	SETD1B
NM_001353694.2	102.302	0.502452	0.180887	2.77772	0.00547426	0.0220355	784.852	0.867322	0.09915	8.74757	2.17995098349109e-18	4.74688551366394e-17	287.757	-0.362702	0.170862	-2.12278	0.0337721	0.105586	TIAM1
NM_001353788.2	126.864	0.688555	0.187631	3.66972	0.000242814	0.00173106	1417.63	0.279126	0.0870157	3.20777	0.00133769	0.00319521	453.143	0.393472	0.184128	2.13695	0.0326023	0.102537	APBA2
NM_001353812.2	87.0446	0.0209606	0.205024	0.102235	0.91857	0.956656	303.156	0.584191	0.148797	3.92608	8.63406618805641e-05	0.000270179	165.76	-0.584155	0.230951	-2.52934	0.0114277	0.0463038	ATP11C
NM_001353921.2	104.998	-0.245716	0.182808	-1.34411	0.178911	0.32287	938.321	-0.383994	0.0893226	-4.29895	1.71605745138739e-05	6.26297797437919e-05	323.967	0.123661	0.16485	0.75014	0.45317	0.62268	ARHGEF9
NM_001354046.2	217.782	-0.106538	0.13498	-0.789284	0.429946	0.589167	1409.1	0.384794	0.0849968	4.52716	5.97817403047935e-06	2.39781401974534e-05	555.822	-0.501225	0.136358	-3.67581	0.000237094	0.00225641	ARHGEF7
NM_001354587.1	57.9415	-0.783775	0.254547	-3.0791	0.00207627	0.0102573	198.168	-0.100862	0.155564	-0.648363	0.51675	0.590862	109.562	-0.696719	0.251322	-2.77221	0.00556767	0.0266894	ANKRD36
NM_001354689.3	297.735	0.0815523	0.126044	0.647016	0.517622	0.663721	3069.14	0.455106	0.068074	6.68546	2.30199716131472e-11	2.20693174953346e-10	1007.57	-0.369039	0.119386	-3.09115	0.00199381	0.0120342	RAF1
NM_001354761.2	1319.14	-0.113646	0.0782891	-1.45161	0.146609	0.280098	5719.86	-0.0553945	0.0648222	-0.854561	0.392794	0.471387	2756.04	-0.0688807	0.0848789	-0.811518	0.417068	0.589065	ADD1
NM_001354909.2	530.86	0.149661	0.0962232	1.55535	0.119863	0.240647	1690.63	0.2177	0.0973992	2.23513	0.025409	0.043734	976.56	-0.0772183	0.128382	-0.601474	0.547525	0.697512	PSPC1
NM_001354930.2	190.312	0.418475	0.143908	2.90794	0.0036382	0.0160633	872.263	0.269941	0.0938282	2.87697	0.00401512	0.00853999	407.796	0.138451	0.147574	0.938182	0.348151	0.523818	RIPK1
NM_001355197.2	56.5855	-0.820926	0.267528	-3.06856	0.00215091	0.0105538	92.1858	0.124712	0.246508	0.505914	0.612917	0.680561	85.0144	-0.954561	0.33668	-2.83521	0.00457951	0.0229834	ZNF66
NM_001355204.2	86.8877	-0.267978	0.213829	-1.25323	0.21012	0.361253	108.212	-0.09907	0.208883	-0.474284	0.635297	0.701382	123.346	-0.194077	0.263231	-0.737289	0.460947	0.629759	TRAPPC2B
NM_001355237.2	129.025	-0.523607	0.170941	-3.06309	0.00219064	0.0107218	286.158	0.425118	0.148043	2.87159	0.00408418	0.00866065	210.307	-0.953712	0.202131	-4.71829	2.37829798961959e-06	5.27731806538747e-05	ZNF738
NM_001355283.3	1751.73	0.0457657	0.0884632	0.517342	0.604918	0.733363	184.32	0.746653	0.160856	4.64176	3.45459101929672e-06	1.44332367474534e-05	2053.08	-0.708474	0.145554	-4.86743	1.13061393815845e-06	2.92433641918773e-05	RPSAP58
NM_001355404.2	287.705	-0.733569	0.12407	-5.91253	3.36887227157509e-09	8.02533894525218e-08	169.786	-0.207232	0.185052	-1.11986	0.262772	0.336583	367.518	-0.532044	0.183717	-2.896	0.00377949	0.019672	ZNF724
NM_001355407.2	126.259	0.446188	0.16848	2.64831	0.00808946	0.0303193	384.573	0.624571	0.150784	4.14217	3.44037561510617e-05	0.000117424	228.459	-0.185998	0.213626	-0.87067	0.383935	0.558065	NUDT4B
NM_001356.5	2647.88	0.456251	0.077077	5.91942	3.23075507584913e-09	7.7400447598397e-08	8959.88	0.431016	0.0657901	6.55138	5.70070903456376e-11	5.17671067179621e-10	4985.56	0.0149664	0.0915424	0.163491	0.870132	0.922771	DDX3X
NM_001357.5	3367.5	0.110508	0.0891298	1.23986	0.215027	0.367517	4744.08	0.440842	0.0776418	5.67789	1.36367627966355e-08	8.79915774021801e-08	4899.85	-0.339502	0.125299	-2.70954	0.00673774	0.0308971	DHX9
NM_001358.3	2030.94	0.577866	0.0831137	6.95271	3.58333692949486e-12	1.46690681196263e-10	3555.84	0.616034	0.0869149	7.08779	1.36274264570319e-12	1.53732694449006e-11	3105.18	-0.0466769	0.121709	-0.383514	0.701339	0.812431	DHX15
NM_001358291.2	284.41	-1.07072	0.127276	-8.41261	4.00984803323176e-17	2.91509038484857e-15	555.85	-0.973251	0.122216	-7.96339	1.6739158831017e-15	2.65152051633421e-14	447.356	-0.106329	0.162303	-0.655124	0.512388	0.670358	RMI1
NM_001358451.3	37.148	-0.0733395	0.304275	-0.24103	0.809532	0.885262	179.154	-0.13829	0.1665	-0.830571	0.406216	0.484664	81.4949	0.0695302	0.294752	0.235894	0.813515	0.88703	ABHD18
NM_001358921.2	71.2652	-0.102074	0.212585	-0.480158	0.631115	0.754451	329.708	-0.145201	0.124428	-1.16695	0.243231	0.314373	153.37	0.0454722	0.203746	0.22318	0.823395	0.893203	COQ2
NM_001359.2	753.627	-0.327487	0.0985348	-3.32357	0.000888734	0.00508805	1350.65	-0.390462	0.0821447	-4.75334	2.00083768741172e-06	8.85677219204143e-06	1158.79	0.0572812	0.115214	0.497172	0.619068	0.752267	DECR1
NM_001359084.1	71.4346	0.382911	0.212103	1.80531	0.0710268	0.163162	2133.24	0.21502	0.105747	2.03334	0.0420181	0.0681328	544.561	0.16056	0.205181	0.782531	0.433903	0.605138	CD24
NM_001360.3	668.522	1.18904	0.0984462	12.0781	1.37929907782375e-33	2.836982712997e-31	4587.53	1.06646	0.0783828	13.6058	3.69744997902398e-42	3.50094505317248e-40	1763.25	0.115186	0.118035	0.975858	0.329135	0.506901	DHCR7
NM_001360016.2	360.094	0.233104	0.11233	2.07517	0.0379705	0.102074	1825.9	0.0851984	0.0806268	1.0567	0.290648	0.365648	809.66	0.141596	0.121359	1.16676	0.243309	0.41572	G6PD
NM_001360452.2	452.274	-0.0357116	0.102158	-0.349573	0.726659	0.825558	1483.89	-0.0981825	0.0806859	-1.21685	0.223662	0.292444	841.446	0.0551868	0.109627	0.503404	0.61468	0.749636	PCMT1
NM_001361041.2	64.2607	-0.308382	0.22446	-1.37388	0.169478	0.311035	80.2535	-0.633464	0.245795	-2.57721	0.00996017	0.0190717	91.2606	0.309718	0.277313	1.11685	0.264057	0.439953	FRRS1
NM_001361665.2	39.2009	-0.0229237	0.29841	-0.0768193	0.938767	0.966031	799.398	0.646592	0.328368	1.9691	0.0489412	0.0780522	218.363	-0.684416	0.450756	-1.51837	0.128921	0.272037	FGF2
NM_001363.5	381.765	0.226419	0.110687	2.04558	0.0407974	0.107649	1901.29	-0.0291991	0.0827815	-0.352725	0.724294	0.77773	850.835	0.242637	0.122074	1.98761	0.0468543	0.133381	DKC1
NM_001363059.2	59.3579	-0.270147	0.240775	-1.12199	0.261866	0.420953	646.686	0.0659332	0.112236	0.587451	0.556901	0.629257	208.417	-0.357354	0.222739	-1.60436	0.108634	0.241252	MTUS1
NM_001363118.2	56.057	0.233848	0.243196	0.961562	0.33627	0.500223	1081.5	-0.34075	0.107588	-3.16718	0.00153924	0.00362728	298.807	0.552369	0.223883	2.46722	0.0136168	0.0528621	SLC52A2
NM_001363540.2	89.1827	0.332917	0.197282	1.68751	0.0915045	0.198185	251.219	0.659422	0.154336	4.27264	1.93171307147337e-05	6.96259454803512e-05	156.956	-0.329492	0.22129	-1.48896	0.136498	0.282026	DOCK4
NM_001363541.2	944.697	0.414772	0.0914988	4.53308	5.8129087483376e-06	6.84365617676524e-05	8015.05	0.0401898	0.0804643	0.499474	0.617446	0.684544	2823.23	0.366099	0.121278	3.01868	0.00253881	0.0145231	DBN1
NM_001363644.2	48.0387	-0.277249	0.269838	-1.02747	0.304201	0.467358	556.33	0.0710021	0.103121	0.688531	0.491118	0.566163	175.79	-0.333432	0.222518	-1.49845	0.134016	0.278813	TBCEL
NM_001363705.2	246.622	0.293854	0.132989	2.2096	0.0271326	0.0788997	379.816	0.0774548	0.123131	0.629044	0.52932	0.602537	365.822	0.207564	0.160236	1.29537	0.195194	0.358032	UBR2
NM_001363758.2	129.762	0.0234401	0.185856	0.126119	0.899637	0.94467	1242.35	-0.653406	0.0989133	-6.60584	3.95263101646847e-11	3.67647037260262e-10	418.318	0.670367	0.19693	3.40408	0.000663864	0.00507038	GATD3B
NM_001363818.2	137.578	-0.358741	0.173842	-2.06361	0.0390551	0.104126	1272.48	-0.150139	0.09001	-1.66803	0.0953095	0.140194	433.918	-0.217237	0.170025	-1.27768	0.201364	0.366164	MTX3
NM_001363845.2	58.9918	-0.151596	0.242003	-0.626423	0.531038	0.676676	789.726	-0.052205	0.0946619	-0.551489	0.581299	0.651757	238.96	-0.0788257	0.20619	-0.382296	0.702242	0.813143	SEPTIN3
NM_001363941.2	189.092	-0.1017	0.152331	-0.667622	0.504375	0.652061	547.871	0.233394	0.114088	2.04575	0.0407814	0.0663574	336.044	-0.341596	0.173808	-1.96536	0.0493726	0.138355	ARMC8
NM_001364013.2	102.654	-0.353301	0.229018	-1.54268	0.122908	0.245032	854.191	-0.957859	0.101294	-9.45623	3.19246696399164e-21	8.76316583242916e-20	302.99	0.584841	0.241841	2.41828	0.015594	0.0588054	NOTCH2NLC
NM_001364564.1	346.306	-0.82963	0.125284	-6.62199	3.54395871616478e-11	1.1954481541367e-09	2440.06	-1.08174	0.234351	-4.6159	3.91403881030037e-06	1.62081597318925e-05	926.562	0.233179	0.215584	1.08161	0.279424	0.456256	SALL2
NM_001364614.2	141.95	-0.47437	0.175706	-2.6998	0.0069382	0.0266438	636.873	-0.120629	0.112514	-1.07212	0.283667	0.35839	301.11	-0.360741	0.191453	-1.88423	0.0595333	0.156772	KDM1B
NM_001364716.4	212.102	-0.0894329	0.145925	-0.612871	0.539962	0.683136	3732.31	0.486247	0.0709817	6.85032	7.36852879786136e-12	7.47227342714533e-11	1052.98	-0.586826	0.137242	-4.27586	1.90402822118911e-05	0.00029159	MPRIP
NM_001364730.1	180.456	-0.225151	0.148718	-1.51395	0.130039	0.255741	124.037	1.09634	0.200109	5.4787	4.28452717433959e-08	2.55887388363995e-07	234.377	-1.3323	0.204095	-6.52783	6.67279197981044e-11	6.27278189852275e-09	ZNF69
NM_001364857.2	40.3698	-0.115141	0.287744	-0.40015	0.689046	0.797628	768.233	0.183551	0.0946063	1.94015	0.0523613	0.0830663	212.93	-0.261677	0.230908	-1.13325	0.257108	0.432463	ADGRB2
NM_001364905.1	585.517	-0.255613	0.103717	-2.46452	0.0137198	0.0462058	720.529	0.394467	0.107567	3.66716	0.000245256	0.00069518	829.247	-0.659716	0.138264	-4.77143	1.8292044154492e-06	4.34474693832892e-05	LRBA
NM_001364929.1	1009.29	-0.0297736	0.0853915	-0.348671	0.727336	0.82586	2194.62	0.35413	0.0745615	4.74951	2.03913891884666e-06	9.00619689157277e-06	1635.9	-0.392282	0.097265	-4.03312	5.50407271786356e-05	0.00070122	ECPAS
NM_001365088.1	50.5261	0.0913813	0.250949	0.364142	0.715752	0.819321	291.949	0.217524	0.136492	1.59368	0.111008	0.160101	121.337	-0.125506	0.2379	-0.527558	0.597806	0.737734	SLC12A6
NM_001365225.1	123.368	0.0728881	0.166304	0.438283	0.661181	0.776907	991.225	-0.165574	0.0910974	-1.81755	0.0691329	0.10577	356.604	0.225188	0.157425	1.43045	0.152588	0.303163	ADPGK
NM_001365324.3	70.9872	0.168515	0.220324	0.764849	0.444362	0.602945	296.789	0.275131	0.142639	1.92887	0.0537476	0.0848344	145.934	-0.102162	0.23104	-0.442181	0.658358	0.780002	TENT4B
NM_001365479.2	103.08	-0.274348	0.18667	-1.4697	0.141644	0.272974	671.467	-0.0741019	0.100035	-0.740759	0.45884	0.535843	264.033	-0.193811	0.177014	-1.09489	0.273565	0.449984	USP40
NM_001365480.1	825.947	-0.159507	0.0894235	-1.78372	0.0744687	0.168879	2420.65	0.393425	0.0834829	4.71264	2.44532139964145e-06	1.05852078226552e-05	1474.11	-0.560328	0.111993	-5.00323	5.63773680292226e-07	1.59521465510874e-05	CCDC88A
NM_001365536.1	142.237	-0.399125	0.161365	-2.47342	0.0133826	0.0452509	321.897	0.138602	0.145253	0.954205	0.33998	0.41685	233.29	-0.547361	0.196383	-2.7872	0.00531649	0.0257636	SCN9A
NM_001365588.1	282.693	0.261369	0.138147	1.89196	0.0584958	0.140813	452.35	0.483727	0.113184	4.2738	1.92167181878676e-05	6.9293660320565e-05	422.982	-0.222127	0.16616	-1.33683	0.181279	0.341117	NLGN4Y
NM_001365613.2	223.902	0.115572	0.139172	0.830423	0.406299	0.566897	890.164	-0.42801	0.0927883	-4.61276	3.97353120936305e-06	1.64383640163488e-05	450.219	0.545889	0.148297	3.68106	0.000232264	0.00222108	RRBP1
NM_001365621.2	218.642	0.223003	0.133125	1.67515	0.0939055	0.20166	2612.86	0.0704362	0.0737096	0.955591	0.339279	0.416172	817.699	0.139972	0.126571	1.10587	0.268782	0.445104	DLGAP4
NM_001365631.1	566.57	0.180968	0.0982324	1.84225	0.065439	0.153419	1615.78	0.213207	0.0847901	2.51452	0.0119193	0.0224006	1001.48	-0.0418894	0.115828	-0.361652	0.717612	0.824262	CLASP2
NM_001365635.2	491.631	-0.366283	0.114423	-3.20114	0.00136887	0.00736676	1270.64	0.208414	0.089412	2.33094	0.0197567	0.0349723	840.564	-0.580922	0.138342	-4.19918	2.6788433326268e-05	0.00038811	TASOR
NM_001365715.1	423.386	0.458848	0.1036	4.42903	9.46566764882649e-06	0.00010451	1863.18	0.721131	0.0897417	8.03563	9.31018408054642e-16	1.53536049406585e-14	890.583	-0.270237	0.123957	-2.18009	0.0292511	0.0945002	LRCH3
NM_001365792.1	76.809	0.0947122	0.21111	0.448639	0.653692	0.772482	1104.44	0.138261	0.113089	1.22258	0.221487	0.290049	327.65	-0.0444686	0.209777	-0.21198	0.832123	0.898783	DAB1
NM_001365896.1	2701.04	0.113511	0.0814722	1.39324	0.163546	0.303029	8178.07	-0.190164	0.0642723	-2.95872	0.00308918	0.00677401	4876.27	0.296565	0.0964139	3.07595	0.0020983	0.01249	NACA
NM_001365919.1	108.602	0.0551295	0.184594	0.298653	0.765205	0.854133	3141.36	0.497641	0.0691196	7.19972	6.03360504697674e-13	7.11121534697524e-12	806.002	-0.478331	0.151622	-3.15475	0.00160637	0.0102303	MSL1
NM_001365951.3	2081.9	0.0576781	0.0708703	0.813854	0.415729	0.576541	5948.59	0.450247	0.0745194	6.04201	1.52209997871591e-09	1.14422270478492e-08	3682.49	-0.401782	0.0896806	-4.48014	7.4594483803684e-06	0.000136111	KIF1B
NM_001365999.1	93.1864	0.0387238	0.203728	0.190076	0.849249	0.911392	756.032	0.37182	0.106355	3.49601	0.000472274	0.0012535	271.029	-0.337628	0.202081	-1.67076	0.0947693	0.21881	SZT2
NM_001366006.2	3173.67	-0.280798	0.0791564	-3.54737	0.000389091	0.00255148	8034.72	0.234227	0.0765548	3.05959	0.00221638	0.00502488	5389.61	-0.523218	0.107057	-4.88729	1.02231191908594e-06	2.67706028004118e-05	ADGRL2
NM_001366057.1	150.638	0.125143	0.168763	0.741528	0.458373	0.614981	1279.17	0.61581	0.0977336	6.3009	2.95918019567913e-10	2.45201686420728e-09	450.526	-0.512238	0.176814	-2.89704	0.00376705	0.0196437	OTUD4
NM_001366145.2	66.6979	0.130075	0.226897	0.573277	0.566457	0.704581	311.207	1.08613	0.151354	7.17608	7.17381808319386e-13	8.33845034304479e-12	144.156	-0.964421	0.246164	-3.91779	8.93627852848308e-05	0.00102938	TRPM3
NM_001366178.1	54.3598	0.233555	0.260951	0.895012	0.37078	0.534682	913.895	-0.0251317	0.103343	-0.243188	0.80786	0.8478	260.55	0.301144	0.228454	1.31818	0.187442	0.349179	ARHGAP33
NM_001366207.1	221.745	0.159544	0.132716	1.20215	0.229304	0.384744	799.011	0.362349	0.102032	3.55132	0.000383303	0.00103761	428.086	-0.210584	0.147576	-1.42695	0.153595	0.30466	DLG1
NM_001366230.1	160.057	-0.389624	0.15762	-2.47192	0.0134389	0.0453864	456.851	0.109251	0.111964	0.975765	0.329181	0.406032	283.01	-0.491872	0.16589	-2.96505	0.00302634	0.0164633	ARHGAP28
NM_001366244.2	160.837	0.597137	0.156869	3.80661	0.000140887	0.00107429	1054.32	0.683482	0.08926	7.65721	1.90019471242597e-14	2.68223464683646e-13	413.502	-0.109217	0.156247	-0.699006	0.484548	0.648217	GOLGA2
NM_001366245.2	144.476	-0.274577	0.159991	-1.7162	0.086126	0.189734	295.156	0.140375	0.14278	0.983158	0.32553	0.402176	230.013	-0.426468	0.187576	-2.27358	0.0229911	0.0786136	LIN9
NM_001366282.2	1139.33	0.0276144	0.0837521	0.329716	0.741615	0.836772	1658.35	0.0795392	0.0792682	1.00342	0.315659	0.392107	1668.97	-0.0629603	0.0993626	-0.633642	0.526315	0.682332	GOLGB1
NM_001366293.2	819.242	-0.249277	0.086531	-2.88078	0.00396688	0.0171026	2558.1	-0.163199	0.124949	-1.30612	0.191512	0.255967	1496.18	-0.0942762	0.168706	-0.558818	0.576286	0.72117	COX7A2
NM_001366299.1	1161.84	0.20931	0.0890526	2.35041	0.0187529	0.0589427	9984.73	0.24667	0.0713961	3.45495	0.00055039	0.00143774	3500.15	-0.0462698	0.109959	-0.42079	0.673909	0.792188	KHSRP
NM_001366306.2	78.1533	0.595595	0.231471	2.57309	0.0100796	0.0358465	334.782	0.288528	0.13438	2.14711	0.0317848	0.0533972	162.425	0.281692	0.243368	1.15747	0.247079	0.420458	KPNA5
NM_001366318.2	181.225	0.253535	0.14563	1.74095	0.0816918	0.18254	1110.36	0.597217	0.0993971	6.0084	1.87365239334051e-09	1.3899004153768e-08	449.077	-0.357295	0.159063	-2.24625	0.0246881	0.083106	FAM193A
NM_001366335.1	360.397	-0.0435211	0.118835	-0.36623	0.714194	0.818314	1796.71	-0.0784848	0.0926746	-0.846886	0.397059	0.475827	803.744	0.0251401	0.146125	0.172045	0.863402	0.919799	CCDC14
NM_001366418.1	281.178	-0.0314461	0.129003	-0.243763	0.807414	0.883817	692.551	-0.225823	0.117271	-1.92565	0.0541485	0.0854033	473.247	0.186674	0.166936	1.11824	0.263465	0.439561	SETDB1
NM_001366432.2	505.563	0.0749241	0.101251	0.739985	0.459309	0.615697	1903.62	0.586707	0.086259	6.80168	1.03403198536667e-11	1.02878247233588e-10	993.804	-0.522572	0.11998	-4.35549	1.32769313371533e-05	0.000217804	PPP4R3A
NM_001366446.1	75.2554	-0.18903	0.211003	-0.895862	0.370327	0.534388	240.883	-0.123037	0.146731	-0.838521	0.401738	0.48041	138.712	-0.076675	0.219541	-0.349251	0.726901	0.830925	RABGAP1L
NM_001366458.2	67.8325	0.595841	0.22572	2.63973	0.00829722	0.0308512	486.832	0.286326	0.115583	2.47723	0.0132405	0.0246091	183.487	0.291546	0.215036	1.3558	0.175162	0.332693	DCBLD1
NM_001366481.3	672.483	0.081484	0.0994291	0.819518	0.412491	0.572975	4954.19	0.0391147	0.0806054	0.485262	0.62749	0.693763	1846.67	0.0322674	0.122495	0.263418	0.792228	0.874459	RPL7L1
NM_001366508.1	149.541	-0.0165268	0.170295	-0.0970476	0.922689	0.958964	1250.73	0.164794	0.0906199	1.81852	0.0689851	0.10564	443.01	-0.171389	0.172755	-0.992093	0.321152	0.499531	RGMB
NM_001366521.1	570.687	-0.371095	0.104572	-3.5487	0.000387135	0.00254261	904.26	0.0835807	0.115712	0.722314	0.470102	0.54627	851.869	-0.46415	0.153378	-3.02618	0.00247662	0.0142643	ATP2B1
NM_001366661.1	137.181	0.346647	0.162349	2.1352	0.0327445	0.0915262	1339.63	0.102277	0.091966	1.11212	0.266089	0.340004	448.091	0.240518	0.162583	1.47936	0.139045	0.285521	CLUH
NM_001366673.1	547.936	-0.172958	0.104491	-1.65525	0.0978738	0.208247	1774.52	0.308513	0.0943443	3.27008	0.00107516	0.00262773	1014.48	-0.490163	0.136033	-3.60327	0.000314237	0.00285215	DPY19L1
NM_001366683.2	89.7302	0.143862	0.220351	0.652877	0.513835	0.660746	241.379	0.452635	0.163513	2.76819	0.00563681	0.0115547	155.473	-0.311213	0.263899	-1.17928	0.238285	0.410065	DOCK9
NM_001366686.3	107.536	0.124611	0.186459	0.668304	0.50394	0.651598	634.99	0.772918	0.106661	7.24651	4.2764723653171e-13	5.13359439067339e-12	261.301	-0.653613	0.185578	-3.52204	0.000428244	0.00362894	SIK3
NM_001366722.1	32.0016	0.582215	0.318321	1.82902	0.0673964	0.157178	128.371	0.818204	0.213222	3.83734	0.000124376	0.000377748	64.625	-0.254773	0.340448	-0.748348	0.45425	0.623716	GRIP1
NM_001366735.2	422.748	0.0514929	0.112003	0.459745	0.645699	0.767035	822.326	0.355626	0.1253	2.83821	0.00453671	0.0095149	664.14	-0.309501	0.169003	-1.83133	0.0670509	0.171014	RBM26
NM_001366845.3	411.262	-0.155951	0.105798	-1.47404	0.14047	0.271631	1582.65	0.253778	0.0790052	3.21217	0.00131738	0.00315205	815.832	-0.415195	0.111324	-3.72959	0.000191791	0.00189365	ZNF106
NM_001366854.1	48.033	-0.316065	0.257827	-1.22588	0.220244	0.374082	546.204	0.145857	0.13883	1.05061	0.293436	0.368577	173.579	-0.464731	0.259319	-1.79212	0.0731131	0.181759	TMEM132B
NM_001367479.1	58.6417	-0.602851	0.240592	-2.50569	0.0122211	0.0419116	106.042	-0.125553	0.258237	-0.486193	0.62683	0.693124	90.395	-0.482469	0.331751	-1.45431	0.14586	0.293598	DNAH14
NM_001367534.1	70.5783	0.461726	0.222896	2.07149	0.0383132	0.102746	523.319	0.0447424	0.107411	0.416553	0.677005	0.737719	194.524	0.443983	0.202402	2.19357	0.0282666	0.0922766	CAMK2G
NM_001367549.1	440.166	-0.0669174	0.103224	-0.648273	0.516808	0.663099	2155.81	0.787044	0.107635	7.31215	2.62897924646136e-13	3.26279942708835e-12	973.397	-0.861689	0.149711	-5.75568	8.62951099466828e-09	4.66436132737455e-07	ATP13A3
NM_001367561.1	1186.89	-0.355872	0.0842433	-4.22433	2.39651127651795e-05	0.000232132	1296.22	0.324062	0.100677	3.21882	0.00128721	0.00309217	1645.45	-0.688664	0.125057	-5.50682	3.65377013699059e-08	1.63500961694367e-06	DOCK7
NM_001367710.1	142.329	0.427757	0.188172	2.27323	0.0230125	0.0695072	1463.44	0.664387	0.104874	6.33508	2.37225241278006e-10	1.99490895979167e-09	480.955	-0.245793	0.210537	-1.16746	0.243025	0.415403	MIDEAS
NM_001367721.1	501.566	-0.203932	0.0994089	-2.05145	0.0402236	0.106468	1375.8	0.415991	0.0875377	4.75214	2.01277124278207e-06	8.89906781895306e-06	874.744	-0.625958	0.114165	-5.48292	4.18364153036555e-08	1.81309747461224e-06	CASK
NM_001367773.1	231.575	-0.0954902	0.131106	-0.728345	0.466402	0.620472	1307.53	0.290752	0.0906454	3.20758	0.00133858	0.00319644	549.694	-0.401516	0.142171	-2.82418	0.00474021	0.023553	ESYT2
NM_001367774.2	54.073	-0.271855	0.246672	-1.10209	0.270422	0.430786	299.16	0.200067	0.132731	1.50731	0.131731	0.18579	126.98	-0.472264	0.232657	-2.02987	0.0423694	0.124441	BCLAF3
NM_001367799.1	148.676	0.324613	0.157327	2.0633	0.0390842	0.104138	859.418	0.27183	0.10549	2.57682	0.00997127	0.0190758	357.205	0.0515551	0.171052	0.301399	0.76311	0.854437	ZSWIM8
NM_001367805.3	551.608	0.38479	0.109961	3.49933	0.000466435	0.00296193	1053.36	0.635459	0.0876774	7.2477	4.23901802668145e-13	5.09589228400066e-12	862.384	-0.253832	0.131738	-1.9268	0.0540049	0.146751	KIF23
NM_001367806.1	53.4074	-0.440116	0.26904	-1.63587	0.101866	0.214331	583.91	0.362125	0.116292	3.11393	0.00184616	0.00425302	187.986	-0.781049	0.248401	-3.1443	0.00166484	0.0104839	PYGO1
NM_001367823.1	106.698	0.467266	0.196306	2.3803	0.0172987	0.0553205	1158.55	0.243626	0.0895637	2.72014	0.00652541	0.0131397	373.801	0.190613	0.185372	1.02827	0.303824	0.482456	ARHGEF18
NM_001367834.3	41.691	0.906335	0.275035	3.29535	0.000983002	0.00556027	391.064	1.02405	0.132427	7.73291	1.05117090261554e-14	1.52465011985218e-13	132.719	-0.137516	0.255935	-0.537308	0.591055	0.732908	ZSWIM4
NM_001367871.1	40.2434	0.629864	0.284498	2.21395	0.0268323	0.0782422	1555.44	0.179282	0.0989374	1.81207	0.0699748	0.106864	383.517	0.426902	0.238234	1.79195	0.0731415	0.181759	FBRSL1
NM_001367909.1	77.7632	-0.723601	0.225567	-3.20792	0.001337	0.00723215	316.897	-1.09421	0.186601	-5.8639	4.52121624594368e-09	3.1513886935126e-08	158.018	0.360074	0.297811	1.20907	0.226637	0.398325	ZNF678
NM_001367916.1	707.828	-0.268098	0.0930541	-2.8811	0.00396293	0.0170977	2184.59	-0.292341	0.0845416	-3.45796	0.000544287	0.001424	1286.91	0.0160629	0.114509	0.140277	0.888442	0.934329	MAGT1
NM_001367949.2	1426.03	-0.128458	0.080787	-1.59008	0.111816	0.228704	2086.05	0.67007	0.113464	5.90559	3.51377281986901e-09	2.4924716795485e-08	2091.5	-0.804639	0.146785	-5.48175	4.21131187195988e-08	1.81309747461224e-06	FAT3
NM_001368238.1	142.576	0.113108	0.17388	0.650492	0.515374	0.662101	356.085	0.0598754	0.124052	0.482664	0.629335	0.695619	241.043	0.0372558	0.193474	0.192562	0.847302	0.908039	LOC102724159
NM_001368809.2	125.899	0.284557	0.167092	1.70299	0.08857	0.193852	1456.83	0.0245552	0.0862425	0.284723	0.775856	0.822097	460.463	0.261267	0.157076	1.66331	0.0962497	0.2215	AMPD2
NM_001368882.1	38.4553	-0.0231244	0.309026	-0.0748301	0.94035	0.966952	341.039	-0.37723	0.182869	-2.06285	0.039127	0.0640239	118.133	0.35482	0.346443	1.02418	0.305751	0.484421	COL13A1
NM_001369387.1	42.714	-0.130201	0.286461	-0.454514	0.649459	0.769658	167.239	0.496572	0.223864	2.21819	0.026542	0.0455447	85.3548	-0.628612	0.355742	-1.76705	0.0772204	0.189225	GNAL
NM_001369441.2	186.733	-0.0686053	0.140405	-0.488625	0.625107	0.750075	573.544	-0.187384	0.105278	-1.7799	0.0750926	0.113753	338.91	0.111379	0.148689	0.749073	0.453813	0.623217	NIF3L1
NM_001369450.1	75.8065	0.579688	0.217775	2.66186	0.00777094	0.0292947	488.2	0.0499034	0.11673	0.427513	0.669006	0.730841	192.932	0.523525	0.213013	2.45772	0.0139823	0.0539335	WDR74
NM_001369598.1	121.301	0.507292	0.171627	2.95578	0.00311879	0.0142013	461.241	0.564903	0.118101	4.78321	1.72517801300097e-06	7.7330186784889e-06	239.385	-0.0624138	0.180483	-0.345816	0.729481	0.832557	ST7
NM_001369623.2	169.196	0.0432831	0.146774	0.294897	0.768073	0.855635	1086.32	0.257762	0.0900351	2.8629	0.00419781	0.00888371	429.979	-0.227138	0.146136	-1.55429	0.120114	0.258236	PI4KB
NM_001369783.1	168.917	-0.496374	0.16128	-3.07772	0.00208594	0.010299	390.446	-0.394135	0.130426	-3.02191	0.00251187	0.00561764	278.797	-0.120125	0.192059	-0.62546	0.531669	0.68674	MLF1
NM_001369789.1	107.806	-0.293814	0.195668	-1.5016	0.133201	0.260563	1765.3	-0.069578	0.08134	-0.855397	0.392331	0.4711	506.554	-0.241829	0.17232	-1.40337	0.160506	0.313284	PWWP3A
NM_001369817.2	82.7014	-0.799205	0.219258	-3.64505	0.000267343	0.00187096	618.158	-0.0527635	0.130286	-0.404982	0.685491	0.74541	229.02	-0.749409	0.238663	-3.14003	0.0016893	0.0106003	LRRC8B
NM_001370062.2	243.232	0.257425	0.143157	1.7982	0.0721446	0.165145	947.859	0.273473	0.0935514	2.92324	0.0034641	0.00749281	485.089	-0.0168507	0.16212	-0.10394	0.917217	0.951523	UBAP2
NM_001370100.5	224.289	0.185502	0.130234	1.42438	0.154336	0.290258	2023.56	0.3555	0.0861863	4.12479	3.71079845026873e-05	0.00012569	696.422	-0.175624	0.135284	-1.29818	0.194226	0.356955	ZMYND11
NM_001370150.2	65.2208	-0.179737	0.22888	-0.785287	0.432285	0.591603	1172.14	-0.078096	0.0836709	-0.933371	0.350628	0.428162	329.008	-0.132657	0.188508	-0.703724	0.481605	0.646207	ISG20L2
NM_001370181.1	229.587	-0.0571931	0.131443	-0.435118	0.663477	0.778287	726.556	0.259265	0.0966226	2.68327	0.00729061	0.0144696	421.4	-0.322637	0.138173	-2.33502	0.0195423	0.0694983	GSTCD
NM_001370259.2	88.8368	0.132257	0.194265	0.680807	0.495993	0.645238	1160.46	-0.2195	0.0882349	-2.48768	0.0128578	0.0239931	353.586	0.350755	0.172007	2.03919	0.0414313	0.12215	MEN1
NM_001370285.1	57.9442	-0.725735	0.254811	-2.84813	0.00439765	0.0185427	26.2639	-0.871266	0.400212	-2.17701	0.0294797	0.0498846	72.2795	0.144002	0.36983	0.389373	0.697	0.808809	HELB
NM_001370298.3	78.1073	-0.889291	0.228105	-3.8986	9.6748850290574e-05	0.000785258	308.648	-1.37416	0.184353	-7.45395	9.05846017174568e-14	1.18902872067447e-12	156.603	0.47615	0.296152	1.60779	0.107881	0.240267	FGD4
NM_001370300.1	34.89	0.421577	0.3011	1.40013	0.161476	0.300204	399.809	-0.235528	0.142558	-1.65216	0.0985024	0.144437	126.748	0.673447	0.284364	2.36826	0.0178721	0.064706	SS18L2
NM_001370302.1	42.7123	0.670257	0.278754	2.40447	0.0161959	0.0524905	1462.32	0.608594	0.0846684	7.18797	6.57604534773893e-13	7.70741782272545e-12	366.168	0.0154797	0.21932	0.0705804	0.943732	0.966895	TSPAN11
NM_001370348.2	575.343	0.0158373	0.0962313	0.164575	0.869278	0.924767	1091.66	-0.0274638	0.0968895	-0.283455	0.776828	0.822731	897.819	0.0352385	0.122082	0.288645	0.772853	0.861313	PHF3
NM_001370472.1	199.527	0.249695	0.146817	1.70071	0.0889966	0.194482	2192.85	0.301495	0.0781676	3.85703	0.000114772	0.00035196	704.741	-0.0678684	0.14343	-0.473181	0.636084	0.763808	CNOT6
NM_001370476.2	67.1144	-0.107516	0.240917	-0.446278	0.655397	0.773326	264.484	-0.136409	0.148332	-0.919616	0.357774	0.435877	134.44	0.0161123	0.252082	0.0639168	0.949036	0.969645	SLC35B3
NM_001370595.2	85.5196	-0.189937	0.203668	-0.932582	0.351036	0.515639	614.939	-0.0213399	0.121576	-0.175528	0.860665	0.890463	231.557	-0.169492	0.212018	-0.799423	0.424045	0.59523	COA8
NM_001370597.1	38.7546	-0.0300553	0.309205	-0.0972018	0.922566	0.958955	765.585	-0.0203991	0.123473	-0.165212	0.868777	0.897424	210.433	-0.044796	0.280721	-0.159575	0.873216	0.925343	ATP8B2
NM_001370658.1	52.9639	-0.209986	0.251827	-0.833851	0.404365	0.56532	218.323	-0.0908631	0.156853	-0.579287	0.562396	0.63453	108.21	-0.118852	0.25584	-0.464554	0.642251	0.768571	BTD
NM_001371072.1	861.111	0.0472042	0.0885866	0.53286	0.594131	0.726565	2668.69	0.117789	0.0714952	1.64751	0.0994523	0.145652	1568.23	-0.0822	0.0972108	-0.845585	0.397784	0.571594	USP11
NM_001371189.2	204.036	-0.20443	0.151926	-1.3456	0.178433	0.322441	1347.6	0.307039	0.0887157	3.46093	0.000538308	0.00141011	526.632	-0.523588	0.160387	-3.26452	0.0010965	0.00754134	UNC13B
NM_001371333.1	449.685	0.219816	0.101578	2.16402	0.0304631	0.0866855	2446.01	-0.0918137	0.0865858	-1.06038	0.288973	0.363785	1046.98	0.303388	0.122389	2.47889	0.0131793	0.0517836	DIABLO
NM_001371340.3	307.485	0.535567	0.132811	4.03254	5.51780889295872e-05	0.000486224	195.558	-0.0967359	1.53955	-0.0628339	0.949899	0.961422	395.741	0.642218	1.59895	0.40165	0.687941	0.801758	LIMS4
NM_001371445.1	282.3	0.273179	0.120939	2.25881	0.0238952	0.071482	1608.04	0.214012	0.0775539	2.75952	0.00578862	0.0118027	673.057	0.0547356	0.11985	0.4567	0.647887	0.771619	LSM12
NM_001371533.1	184.016	-0.227749	0.15563	-1.4634	0.143359	0.275449	692.31	0.35205	0.0995997	3.53465	0.000408311	0.00109581	361.601	-0.58317	0.165852	-3.51621	0.000437758	0.00368749	FUT8
NM_001371589.1	160.125	0.237812	0.161463	1.47286	0.140789	0.272186	3530.54	0.202787	0.0720581	2.81421	0.00488968	0.0101742	949.418	0.0551166	0.145936	0.377677	0.70567	0.815545	WIZ
NM_001371596.2	92.5796	-0.442405	0.196026	-2.25687	0.0240162	0.0716409	305.203	-0.560127	0.155105	-3.61127	0.000304703	0.000843261	172.515	0.105264	0.22997	0.457729	0.647147	0.77154	MFSD8
NM_001371623.1	248.818	0.128311	0.142719	0.899043	0.36863	0.532669	1636.58	0.248276	0.0802111	3.09528	0.0019663	0.00450885	640.852	-0.124416	0.152515	-0.815766	0.414634	0.587003	TCOF1
NM_001371910.2	143.611	0.792622	0.168233	4.71146	2.45945642534851e-06	3.19577750923945e-05	1633.87	1.61339	0.123769	13.0355	7.6906449383313e-39	6.17229189479217e-37	519.529	-0.832144	0.207999	-4.00072	6.31500891279409e-05	0.000790032	MAP3K2
NM_001371928.1	86.8558	0.352212	0.206205	1.70807	0.087624	0.19223	1349.32	0.256005	0.116649	2.19466	0.028188	0.0480015	392.358	0.0960638	0.218769	0.43911	0.660582	0.781319	AHDC1
NM_001372043.1	98.4535	-0.0651315	0.18417	-0.353649	0.723602	0.824185	176.805	0.664759	0.184299	3.60696	0.00030981	0.00085655	151.503	-0.73832	0.228266	-3.23447	0.0012187	0.00823404	PCSK5
NM_001372052.1	944.209	-0.0565179	0.0840669	-0.672297	0.501395	0.649394	6051.28	0.0469969	0.0685614	0.685471	0.493047	0.567765	2396.87	-0.110853	0.0922444	-1.20173	0.229469	0.400679	HP1BP3
NM_001372078.1	203.148	0.172274	0.145711	1.1823	0.237086	0.393417	921.348	0.831774	0.111755	7.44282	9.8554866838757e-14	1.28351343834688e-12	433.244	-0.663641	0.174404	-3.80519	0.000141694	0.00147139	REV3L
NM_001372080.1	52.1274	-0.489764	0.252718	-1.93799	0.0526247	0.130142	944.397	-0.0225044	0.100948	-0.222931	0.823589	0.860246	264.603	-0.501236	0.221521	-2.2627	0.0236542	0.0803358	ZSCAN29
NM_001372327.1	149.857	-0.136415	0.172524	-0.790699	0.429119	0.588704	1025.74	-0.593994	0.0904408	-6.56777	5.10739160106375e-11	4.6630540652399e-10	394.466	0.455592	0.171982	2.64907	0.00807143	0.0355767	SLC29A1
NM_001372574.1	454.5	0.480074	0.110789	4.33321	1.46950908876967e-05	0.000153181	736.21	1.05115	0.121077	8.6817	3.89905390402286e-18	8.31831069600016e-17	682.08	-0.57922	0.162038	-3.57459	0.000350781	0.00311018	ATXN2
NM_001374258.1	115.878	0.24147	0.17094	1.4126	0.157773	0.294881	686.711	0.560707	0.123019	4.55789	5.16699534329209e-06	2.09741183805021e-05	282.069	-0.326478	0.193691	-1.68556	0.0918797	0.213955	BRAF
NM_001374353.1	138.007	0.405665	0.160823	2.52243	0.0116548	0.0405047	1755.68	0.464679	0.0856908	5.42274	5.86916682765897e-08	3.40629950803596e-07	539.257	-0.0607239	0.153563	-0.395433	0.692523	0.80565	GLI2
NM_001374736.1	1401.09	-0.16736	0.0822528	-2.0347	0.041881	0.109752	2863.6	0.751513	0.0842196	8.92325	4.52800009948225e-19	1.05699326421986e-17	2231.31	-0.927357	0.110297	-8.40778	4.17846492893801e-17	1.35510831849251e-14	DST
NM_001374828.1	274.432	0.270079	0.125501	2.15202	0.0313961	0.0887462	1570.22	0.722109	0.084128	8.58346	9.20645841180783e-18	1.87851876601222e-16	655.947	-0.462867	0.133076	-3.47821	0.000504776	0.00408864	ARID1B
NM_001375405.1	133.835	-0.465063	0.165814	-2.80472	0.00503598	0.0206262	617.407	-0.206762	0.106808	-1.93584	0.0528877	0.0836967	287.637	-0.271206	0.169516	-1.59989	0.109624	0.242738	CEP120
NM_001375462.1	286.27	-0.14769	0.120935	-1.22123	0.221997	0.376227	2285.54	0.230428	0.0856423	2.69058	0.00713275	0.0142021	824.491	-0.38292	0.132251	-2.8954	0.00378681	0.019698	LPP
NM_001375505.1	4232.93	-0.0483423	0.0904867	-0.534248	0.59317	0.725904	12647	0.206608	0.0944068	2.18849	0.028634	0.0486391	7606.7	-0.262362	0.144147	-1.82011	0.0687428	0.173857	MAP2
NM_001375524.1	849.414	0.0271822	0.0936409	0.290281	0.771601	0.858417	2094.04	1.04134	0.0831164	12.5287	5.20151997293257e-36	3.62257924065312e-34	1430.62	-1.02288	0.118846	-8.60675	7.51587856280314e-18	3.01780419245505e-15	TRRAP
NM_001375567.1	463.985	-0.384014	0.10518	-3.65103	0.000261195	0.00184169	1013.33	0.26996	0.0996126	2.7101	0.00672625	0.0134765	753.023	-0.661714	0.132159	-5.00696	5.52951156939522e-07	1.56985998495423e-05	FOCAD
NM_001375584.1	298.079	0.360814	0.121313	2.97424	0.00293719	0.0135426	2227.84	0.483514	0.0854824	5.6563	1.54673978401122e-08	9.87452739383527e-08	825.59	-0.126536	0.133693	-0.946471	0.343908	0.52071	SMG7
NM_001375635.1	62.0399	0.0245465	0.246722	0.0994905	0.920749	0.957965	1052.21	-0.560437	0.0900953	-6.22049	4.95619403966869e-10	3.99291081953041e-09	299.283	0.569846	0.208804	2.7291	0.00635073	0.0295907	CDC42SE2
NM_001375670.1	440.352	0.13129	0.107892	1.21686	0.223656	0.37817	6153.44	0.121426	0.0707217	1.71696	0.085987	0.12764	1839.86	0.00697246	0.111289	0.062652	0.950044	0.970175	ABI2
NM_001375765.1	46.7995	0.60574	0.256543	2.36117	0.0182174	0.0577548	1202	-0.185493	0.117699	-1.57599	0.115027	0.16499	314.322	0.789349	0.240868	3.2771	0.0010488	0.0072945	GIGYF1
NM_001375808.2	210.983	-0.549014	0.140846	-3.89796	9.70048296909559e-05	0.000786579	1194.83	-0.585825	0.109109	-5.36916	7.91027666197328e-08	4.48586146907462e-07	501.38	0.0288841	0.170455	0.169453	0.86544	0.921039	LPIN2
NM_001375883.1	55.3405	0.222122	0.249016	0.891999	0.372393	0.535995	1592.02	0.567909	0.0765535	7.41846	1.18493644599213e-13	1.52449762295812e-12	408.799	-0.326001	0.189747	-1.71808	0.0857817	0.204	GPR161
NM_001375905.1	39.6368	0.56074	0.31015	1.80796	0.0706123	0.162644	286.897	1.30007	0.476567	2.72798	0.00637231	0.0128529	107.783	-0.695932	0.606883	-1.14673	0.251492	0.425734	SGMS2
NM_001375912.1	335.355	-0.308313	0.145612	-2.11736	0.0342292	0.0945788	4651.28	0.239868	0.0734195	3.26708	0.00108663	0.0026542	1393.75	-0.543204	0.162613	-3.34047	0.000836357	0.00610049	ZNF532
NM_001376.5	3662.14	0.102379	0.08484	1.20674	0.227534	0.382764	5266.2	0.670477	0.0721086	9.29815	1.42914253330906e-20	3.70565665482938e-19	5351.51	-0.57728	0.112989	-5.10915	3.23605506568815e-07	9.88443815503733e-06	DYNC1H1
NM_001376000.2	549.168	-0.494973	0.10572	-4.68194	2.84170073509626e-06	3.6364282699646e-05	1067.26	-0.413553	0.0965762	-4.28215	1.85097013066736e-05	6.69734877249197e-05	862.501	-0.0904439	0.1326	-0.682083	0.495186	0.657235	GTF2H2C
NM_001376013.1	592.664	-0.191929	0.0966572	-1.98567	0.0470701	0.119417	2370.45	0.101577	0.0793236	1.28054	0.200357	0.2661	1195.01	-0.303033	0.110439	-2.74389	0.00607152	0.0285209	EPB41
NM_001376049.1	134.758	-0.961381	0.168014	-5.72205	1.05248797386656e-08	2.28414796407559e-07	367.726	-0.390087	0.135574	-2.87731	0.00401086	0.00853308	234.581	-0.579253	0.193281	-2.99695	0.00272695	0.0152579	FAM169A
NM_001376113.1	224.993	0.480741	0.136466	3.52279	0.000427022	0.00274891	1030.12	0.636124	0.123275	5.16021	2.46673890693572e-07	1.29273686372806e-06	481.96	-0.163439	0.18517	-0.882644	0.377429	0.551705	ZBTB38
NM_001376223.1	71.6761	-0.675432	0.225558	-2.99449	0.00274904	0.012944	553.521	-1.0347	0.149428	-6.92443	4.37735151699121e-12	4.55969607338503e-11	202.28	0.35306	0.259688	1.35956	0.17397	0.331356	ZNF587B
NM_001376312.2	69.7787	-0.351595	0.222873	-1.57756	0.114667	0.232896	531.981	0.153743	0.109132	1.40878	0.158901	0.218123	195.519	-0.508432	0.206338	-2.46407	0.0137368	0.0531812	GTDC1
NM_001376342.1	268.349	0.542984	0.124885	4.34788	1.37458992246276e-05	0.000143999	3259.44	0.7384	0.0865347	8.53299	1.42606865982731e-17	2.86130490389636e-16	1015.23	-0.208459	0.138421	-1.50598	0.132073	0.275877	ZC3H11A
NM_001376376.1	738.114	0.295052	0.0932969	3.1625	0.00156419	0.00819814	4574.39	0.408459	0.079314	5.1499	2.60630259023577e-07	1.35659740135373e-06	1840.09	-0.123923	0.114878	-1.07874	0.280704	0.458168	CELF1
NM_001376558.2	89.3571	0.181156	0.200517	0.903443	0.366291	0.530653	716.973	0.138919	0.108468	1.28073	0.200288	0.266092	258.136	0.0178278	0.199968	0.089153	0.92896	0.958633	ARFIP2
NM_001376587.1	255.671	-0.222797	0.134826	-1.65248	0.0984376	0.208941	442.633	-0.285707	0.127074	-2.24835	0.0245541	0.0424621	389.899	0.0539736	0.175908	0.306829	0.758973	0.852262	IFI16
NM_001376852.1	177.661	-0.503836	0.146136	-3.44772	0.00056535	0.00349787	1332.87	-0.0843824	0.0936893	-0.900662	0.367768	0.446271	493.058	-0.424785	0.151891	-2.79665	0.00516358	0.0251964	TMEM181
NM_001376937.1	620.195	0.765114	0.0984517	7.77146	7.75852390588477e-15	4.36184213988842e-13	8.71394	-0.569415	0.798364	-0.713228	0.475705	0.551715	714.607	1.35446	0.42084	3.21847	0.00128877	0.00859769	H3C4
NM_001377.3	926.941	-0.535386	0.0982587	-5.44874	5.07289574461544e-08	9.44364896563842e-07	631.807	0.516282	0.120271	4.29264	1.76562587657642e-05	6.42163541731095e-05	1202.8	-1.06029	0.150751	-7.03339	2.01573664111564e-12	2.93046402722191e-10	DYNC2H1
NM_001377137.1	507.179	0.194287	0.102755	1.89078	0.0586534	0.141039	1205.34	0.296031	0.0909085	3.25636	0.00112849	0.0027477	844.208	-0.111469	0.122829	-0.907511	0.364136	0.537911	GBF1
NM_001377229.1	95.1762	-1.51582	0.220531	-6.8735	6.26447568047169e-12	2.46861324361765e-10	273.192	-1.15319	0.149679	-7.70445	1.31411054773259e-14	1.88013745089008e-13	168.635	-0.356939	0.246134	-1.45018	0.147008	0.295136	DISP1
NM_001377299.1	569.393	-0.112408	0.0955979	-1.17584	0.239658	0.39637	1590.97	-0.260046	0.0831499	-3.12744	0.00176337	0.00408689	999.201	0.142425	0.108881	1.30807	0.190849	0.353185	NDUFS2
NM_001377334.1	73.0785	0.257931	0.213243	1.20956	0.226447	0.381926	474.262	-0.0724944	0.164661	-0.440265	0.659745	0.722223	186.802	0.321618	0.266727	1.20579	0.227897	0.399175	PIK3C2B
NM_001377405.1	52.5556	0.237987	0.249282	0.95469	0.339735	0.504031	578.357	0.608714	0.110193	5.52407	3.31236255642011e-08	2.02563710181076e-07	185.808	-0.409319	0.221937	-1.8443	0.0651394	0.167516	ATXN7
NM_001377448.1	43.0699	0.690636	0.280413	2.46293	0.0137808	0.046374	952.244	0.645436	0.1094	5.89978	3.63996016438002e-09	2.57574717289482e-08	256.017	0.0478987	0.245758	0.194902	0.845469	0.906997	BAHCC1
NM_001377458.1	315.29	-0.310707	0.122426	-2.53793	0.0111511	0.0389874	676.645	-0.176832	0.0964132	-1.83411	0.0666383	0.102606	509.082	-0.150343	0.135239	-1.11169	0.266272	0.442405	CLCC1
NM_001377500.1	33.5968	0.846927	0.307971	2.75002	0.00595913	0.0235268	1135.64	0.449237	0.133028	3.37701	0.000732779	0.00186278	284.849	0.40593	0.285721	1.42072	0.155397	0.307224	EFCC1
NM_001377540.1	84.7104	-0.296797	0.212323	-1.39785	0.162157	0.30094	643.513	0.525908	0.127659	4.11963	3.7948681351621e-05	0.000128277	236.864	-0.821949	0.229711	-3.57819	0.000345987	0.00307091	SLMAP
NM_001377935.1	88.7762	0.102048	0.195109	0.523031	0.600953	0.73129	1867.94	0.782873	0.0774404	10.1094	5.02078404477727e-24	1.68415659410592e-22	507.168	-0.684227	0.163768	-4.17803	2.94048139870178e-05	0.000418114	RAPGEF1
NM_001377960.1	324.898	-1.11793	0.128637	-8.69059	3.60557980366505e-18	2.86847683814221e-16	802.921	-0.615922	0.111536	-5.52219	3.3480239514801e-08	2.04596068449042e-07	547.446	-0.511359	0.163652	-3.12467	0.00178005	0.0109959	RBM12B
NM_001378.3	1998.12	-0.205375	0.0776344	-2.64542	0.00815907	0.0304609	2860.83	-0.109639	0.0835403	-1.31241	0.189382	0.253441	2916.74	-0.104539	0.107346	-0.973854	0.330129	0.507594	DYNC1I2
NM_001378024.1	144.45	0.115261	0.159576	0.722292	0.470115	0.623934	1072.62	0.334193	0.112878	2.96066	0.00306983	0.00674034	398.586	-0.224118	0.184277	-1.2162	0.223907	0.395095	ARHGAP32
NM_001378026.1	160.939	0.39089	0.152077	2.57034	0.0101598	0.0360486	316.429	0.449667	0.184326	2.43953	0.0147065	0.0269651	253.546	-0.0627286	0.241208	-0.26006	0.794817	0.875702	NBEAL1
NM_001378067.1	207.247	-0.52136	0.14123	-3.69155	0.00022289	0.0016079	1106.35	-0.603658	0.100706	-5.99427	2.04405285743037e-09	1.50833917947161e-08	477.877	0.0802565	0.157402	0.509883	0.610133	0.746658	MTMR4
NM_001378074.1	178.483	0.0534472	0.152907	0.349541	0.726683	0.825558	1579.12	-0.321403	0.0912283	-3.52306	0.00042659	0.00114014	547.302	0.375882	0.16027	2.3453	0.0190116	0.0678926	BOC
NM_001378107.1	117.652	-0.0922671	0.200172	-0.460939	0.644842	0.766258	996.494	0.314703	0.0899736	3.49773	0.000469235	0.00124582	351.244	-0.395178	0.199812	-1.97775	0.0479569	0.13565	R3HDM1
NM_001378120.1	56.5937	0.170978	0.240896	0.709758	0.477854	0.62998	470.292	0.939921	0.143678	6.54186	6.07595623154217e-11	5.49968669851835e-10	167.028	-0.770799	0.253749	-3.03765	0.00238433	0.0138428	MBD5
NM_001378122.1	86.1146	-0.781127	0.209402	-3.73028	0.000191268	0.00140258	546.031	-0.302208	0.120715	-2.50349	0.0122976	0.0230306	217.297	-0.469849	0.214224	-2.19327	0.0282882	0.0922766	SH3D19
NM_001378204.1	93.8419	-0.0169455	0.199909	-0.0847661	0.932447	0.963459	238.279	-0.0765211	0.149164	-0.513001	0.607951	0.676241	159.486	0.0501405	0.219867	0.228049	0.819608	0.890929	CCDC18
NM_001378213.1	76.8482	0.52926	0.211723	2.49978	0.0124271	0.0425489	1463.94	0.69958	0.102251	6.84182	7.8194917050684e-12	7.90106194227955e-11	405.836	-0.176475	0.201969	-0.873776	0.38224	0.556274	BCL9L
NM_001378328.1	310.916	-0.0136902	0.120696	-0.113427	0.909692	0.950965	3991.26	0.330903	0.0766493	4.3171	1.58090834772904e-05	5.80493012911226e-05	1222.69	-0.34928	0.126622	-2.75844	0.00580773	0.0275272	CELSR1
NM_001378414.1	32.6256	0.756193	0.306911	2.46389	0.013744	0.0462687	583.511	0.721241	0.131147	5.49947	3.80942913887519e-08	2.30618242480612e-07	164.042	0.0443089	0.279815	0.15835	0.874181	0.925551	HDAC4
NM_001378418.1	264.64	-0.0278341	0.134488	-0.206963	0.836038	0.903191	968.646	0.585398	0.0994263	5.88777	3.91451877311611e-09	2.75126352802748e-08	514.218	-0.614965	0.157293	-3.90968	9.24184643568099e-05	0.00106023	TCF20
NM_001378454.1	546.099	-0.307494	0.0995627	-3.08845	0.00201204	0.0100163	876.224	0.583833	0.0941633	6.20021	5.63873740005193e-10	4.48279623304129e-09	817.793	-0.898699	0.120197	-7.47692	7.608709837258e-14	1.45810548517635e-11	ALMS1
NM_001378457.1	475.676	-0.2739	0.108622	-2.52158	0.0116829	0.0405607	922.062	0.345724	0.092661	3.73106	0.000190672	0.000554259	746.773	-0.629404	0.129756	-4.85069	1.23032626708131e-06	3.12473225422579e-05	DMXL2
NM_001378615.1	121.258	0.120187	0.176941	0.67925	0.496979	0.645866	388.141	0.187004	0.127492	1.46679	0.142432	0.198622	223.466	-0.0678613	0.192998	-0.351616	0.725126	0.829666	CC2D2A
NM_001378687.1	681.149	-0.225079	0.0940564	-2.39302	0.0167103	0.0537239	1753.38	0.200131	0.0951238	2.1039	0.0353873	0.0586333	1163.02	-0.433951	0.127657	-3.39935	0.000675452	0.00515422	ATP2C1
NM_001378743.1	65.789	-0.510968	0.225764	-2.26328	0.0236185	0.0709061	296.422	-0.127728	0.142142	-0.898592	0.36887	0.447133	139.837	-0.39339	0.230136	-1.70938	0.0873802	0.206482	CYLD
NM_001378778.1	956.88	-0.154108	0.0899952	-1.7124	0.086823	0.19097	2181.04	0.544385	0.0816629	6.66625	2.62424058398705e-11	2.51015611819057e-10	1572.89	-0.70738	0.113929	-6.20894	5.33420287576489e-10	3.87741367659048e-08	MPDZ
NM_001378964.1	243.642	-0.172466	0.145669	-1.18396	0.236429	0.39288	857.137	0.132263	0.108904	1.21449	0.22456	0.293151	465.796	-0.30902	0.176896	-1.74691	0.0806537	0.194863	CDON
NM_001378974.1	334.79	-0.0022633	0.120444	-0.0187914	0.985008	0.993015	1721.16	0.50776	0.0831148	6.10914	1.00168458735769e-09	7.70182118399932e-09	757.936	-0.526828	0.131063	-4.01965	5.82846433122106e-05	0.000735713	FBXW11
NM_001379029.1	353.736	-0.0991597	0.112523	-0.881239	0.378188	0.541287	452.029	0.442796	0.158377	2.79583	0.00517663	0.0107209	504.492	-0.550625	0.191349	-2.8776	0.00400712	0.0206528	CERT1
NM_001379081.2	163.47	-0.483588	0.157972	-3.06122	0.00220439	0.0107703	317.941	-0.619771	0.181725	-3.41048	0.000648478	0.00166913	256.789	0.122293	0.245355	0.498434	0.618178	0.751944	FREM1
NM_001379110.1	157.726	-0.0939148	0.157641	-0.595752	0.551341	0.691369	527.732	0.0736467	0.123505	0.596303	0.550973	0.623228	295.67	-0.173446	0.185385	-0.9356	0.349479	0.525278	SLC9A6
NM_001379286.1	369.273	0.182378	0.127224	1.43351	0.151711	0.286599	2991.67	0.278302	0.0883715	3.14923	0.00163703	0.00383096	1073.02	-0.100737	0.155303	-0.648647	0.516567	0.673838	ZNF423
NM_001379291.1	395.217	0.246114	0.120021	2.05059	0.0403067	0.106621	2716.02	0.863733	0.101604	8.50094	1.88058553026599e-17	3.72886923848271e-16	1043.33	-0.626705	0.162305	-3.86128	0.000112794	0.00122562	BRD4
NM_001379313.1	240.68	-0.155139	0.128471	-1.20758	0.22721	0.382524	960.876	-0.340159	0.0919975	-3.69748	0.000217748	0.000625199	484.832	0.178528	0.134939	1.32303	0.185825	0.347042	SRPRB
NM_001379403.1	339.18	0.339685	0.114595	2.96421	0.00303462	0.0139265	2663.69	0.773951	0.0725554	10.667	1.45183053606902e-26	5.88200765742963e-25	967.421	-0.438824	0.112946	-3.88527	0.000102216	0.00114918	WDR26
NM_001379451.1	118.39	-0.129603	0.180616	-0.71756	0.473029	0.62593	734.554	-0.263188	0.0969966	-2.71337	0.00666026	0.0133624	295.266	0.137084	0.175391	0.781586	0.434458	0.605312	BCORL1
NM_001379659.1	86.0976	0.068361	0.195074	0.350436	0.726012	0.825558	1097.34	0.198015	0.0983594	2.01317	0.0440965	0.0710926	336.796	-0.132869	0.182828	-0.726743	0.467383	0.635027	ZNF142
NM_001381853.1	192.099	-0.36322	0.153898	-2.36013	0.0182686	0.0578721	1544.67	0.114319	0.106018	1.0783	0.280899	0.355436	555.601	-0.487223	0.181623	-2.6826	0.00730527	0.0330284	CHML
NM_001381865.2	147.073	0.484553	0.159251	3.0427	0.00234467	0.0113571	1686.02	0.238235	0.0831303	2.8658	0.00415952	0.00881153	534.522	0.234445	0.151291	1.54963	0.12123	0.259906	RCC1
NM_001382.4	149.44	0.278837	0.160628	1.73592	0.0825781	0.183625	475.971	0.138414	0.112448	1.23092	0.218352	0.286702	274.928	0.137004	0.171306	0.799763	0.423848	0.595053	DPAGT1
NM_001382226.1	351.944	0.305429	0.113682	2.68669	0.00721629	0.0275113	5221.25	-0.277929	0.07481	-3.71513	0.0002031	0.000586541	1535.98	0.572486	0.120341	4.75721	1.96287953801723e-06	4.57209952059705e-05	MLF2
NM_001382241.1	341.534	0.534391	0.115658	4.62046	3.82882436777293e-06	4.76231207867686e-05	2786.81	0.143535	0.072707	1.97415	0.0483647	0.077279	996.571	0.389598	0.115819	3.36385	0.000768638	0.00572035	TNPO2
NM_001382266.1	84.569	0.0304768	0.201231	0.151452	0.879619	0.932576	522.353	-0.192836	0.158654	-1.21545	0.224194	0.292874	210.414	0.215585	0.255017	0.845376	0.397901	0.571618	RNFT2
NM_001382293.1	232.194	-0.241695	0.149668	-1.61488	0.106338	0.220764	1579.15	-0.291762	0.102487	-2.84682	0.0044158	0.0092937	609.181	0.0378828	0.182515	0.20756	0.835573	0.90039	LAMTOR5
NM_001382294.1	158.037	-0.0134907	0.162975	-0.0827776	0.934028	0.963813	1941.82	-0.437026	0.096803	-4.51459	6.3439658607483e-06	2.53367773974056e-05	602.435	0.410143	0.175777	2.33332	0.0196313	0.0697562	TOMM6
NM_001382309.1	38.7385	0.52792	0.286074	1.84539	0.0649801	0.152428	2354.67	0.536372	0.0901239	5.95149	2.65707655740313e-09	1.92529528368325e-08	555.102	-0.0380045	0.229594	-0.165529	0.868528	0.922084	ATXN7L3
NM_001382344.1	500.98	0.813411	0.379003	2.14619	0.0318579	0.0897022	303.111	-0.211755	0.183639	-1.15311	0.248867	0.320673	641.529	1.01346	0.462458	2.19146	0.0284184	0.0925496	RGPD1
NM_001382347.1	353.697	-0.684369	0.113251	-6.04293	1.51344714754992e-09	3.7984820819311e-08	1110.51	0.19827	0.115971	1.70965	0.0873305	0.129498	647.279	-0.891887	0.159096	-5.60598	2.0707797291048e-08	9.92091742943845e-07	MYO5A
NM_001382391.1	67.6997	0.24905	0.228941	1.08784	0.276667	0.437326	307.03	0.0741037	0.137073	0.540617	0.588772	0.659083	144.334	0.167099	0.231799	0.72088	0.470983	0.637807	CSPP1
NM_001382430.1	129.181	-0.230744	0.182975	-1.26107	0.207285	0.358351	4534.33	-0.0377821	0.0650025	-0.581241	0.561078	0.633213	1131.29	-0.181306	0.15639	-1.15932	0.246325	0.419428	AKT1
NM_001382507.1	78.2739	-0.694851	0.21828	-3.18329	0.0014561	0.00775696	386.319	-0.79179	0.12724	-6.2228	4.8834612462894e-10	3.94185133357095e-09	173.693	0.0896174	0.221066	0.405387	0.685193	0.799615	DMAC2L
NM_001382508.1	372.748	-0.221154	0.114299	-1.93487	0.0530061	0.13097	1673.42	0.0862091	0.087562	0.98455	0.324845	0.401565	791.073	-0.311719	0.1295	-2.40711	0.0160794	0.0603134	DROSHA
NM_001382548.1	578.113	0.39544	0.0942445	4.1959	2.71794246720019e-05	0.000259281	2075	0.240907	0.0781425	3.08292	0.00204981	0.0046787	1114.26	0.146282	0.105186	1.3907	0.164316	0.318655	TCERG1
NM_001382567.1	65.2121	-0.225864	0.222858	-1.01349	0.310825	0.475629	847.055	-0.206413	0.0956384	-2.15827	0.030907	0.0520594	258.525	-0.0197128	0.196174	-0.100486	0.919958	0.953571	STIM1
NM_001382683.1	51.4399	0.0352432	0.251776	0.139979	0.888677	0.937714	314.302	-0.305134	0.154343	-1.97699	0.0480428	0.0768229	127.215	0.335871	0.26412	1.27166	0.203494	0.369003	MBNL2
NM_001382779.1	46.1931	0.226781	0.272488	0.83226	0.405262	0.566292	2327.47	0.00108816	0.0871964	0.0124794	0.990043	0.992635	557.644	0.226841	0.21699	1.0454	0.295837	0.47359	FBXL19
NM_001384125.1	467	-0.419016	0.104642	-4.00429	6.22045852011137e-05	0.000538022	949.245	0.553451	0.114334	4.84065	1.29414239125636e-06	5.92703148430292e-06	742.649	-0.982753	0.150319	-6.53777	6.24411982261553e-11	5.98300208457888e-09	KIAA1109
NM_001384369.1	91.8394	-0.113211	0.204132	-0.554599	0.579169	0.715136	1149.43	-0.478669	0.089962	-5.32079	1.03315696434237e-07	5.73923120534816e-07	354.657	0.371606	0.189619	1.95975	0.0500253	0.139169	NRM
NM_001384528.1	191.741	0.465186	0.14281	3.25738	0.00112446	0.00624351	4281.83	0.318418	0.0782084	4.0714	4.67309612813083e-05	0.000154614	1148.8	0.145471	0.141294	1.02956	0.303218	0.48213	GATAD2A
NM_001384574.2	123.861	0.379395	0.188023	2.01781	0.0436109	0.112986	2980.78	0.600512	0.0896726	6.69672	2.13151263162882e-11	2.0481478844625e-10	788.76	-0.221234	0.183937	-1.20277	0.229065	0.400389	SAMD4B
NM_001384609.1	61.7203	-0.441877	0.238996	-1.84889	0.0644733	0.151449	402.54	-0.4631	0.122852	-3.76959	0.000163516	0.00048332	158.159	0.0417707	0.22809	0.183132	0.854694	0.913639	SLITRK5
NM_001384647.1	808.083	0.151389	0.0912686	1.65872	0.0971717	0.207088	4172.3	-0.271746	0.102907	-2.64069	0.00827367	0.0161693	1832.95	0.413799	0.144816	2.85741	0.00427118	0.0217086	SNRPD2
NM_001384732.1	325.812	-0.711899	0.121004	-5.88327	4.02229268571767e-09	9.3961202821765e-08	498.366	0.464426	0.132272	3.51115	0.000446169	0.00118983	482.629	-1.1861	0.169298	-7.00598	2.45259819759432e-12	3.39021442657628e-10	CPLANE1
NM_001384980.1	51.2099	0.411151	0.308925	1.33091	0.183219	0.328462	2890.01	-0.302686	0.0963574	-3.14129	0.00168207	0.00392437	685.149	0.702942	0.416811	1.68648	0.0917039	0.213604	NPIPB4
NM_001385012.1	868.063	-0.0680077	0.0921419	-0.738075	0.460469	0.61663	1347.48	0.567603	0.0979562	5.79446	6.85418794613718e-09	4.64684165905857e-08	1289.99	-0.643927	0.129601	-4.96853	6.74635928754448e-07	1.88361925538328e-05	NBEA
NM_001385016.1	124.879	0.0800504	0.164323	0.487153	0.62615	0.750899	257.884	0.29676	0.146225	2.02947	0.0424105	0.068703	199.436	-0.225229	0.186892	-1.20513	0.228153	0.399345	FAM214A
NM_001385026.1	162.26	0.414066	0.157343	2.63162	0.00849786	0.0314447	960.734	0.830199	0.102538	8.09648	5.65735848038153e-16	9.67029612863594e-15	394.829	-0.415075	0.17127	-2.42351	0.0153712	0.0581992	PEAK1
NM_001385079.1	61.1225	-0.0446253	0.23857	-0.187053	0.851619	0.912542	620.686	0.390404	0.139602	2.79655	0.00516513	0.0107024	204.788	-0.432614	0.254574	-1.69936	0.0892509	0.209628	PDE10A
NM_001385109.1	153.645	0.329619	0.16526	1.99454	0.0460928	0.117717	5113	-0.0845494	0.0787572	-1.07354	0.283027	0.357689	1284.84	0.410468	0.15852	2.58938	0.00961499	0.0407821	PHC2
NM_001385174.1	52.714	-0.410791	0.25081	-1.63786	0.101452	0.21371	866.063	-0.00754233	0.116746	-0.0646046	0.948489	0.960459	248.293	-0.432808	0.236262	-1.8319	0.0669668	0.170871	USP36
NM_001385305.1	385.594	-0.602115	0.125445	-4.79982	1.58810534104312e-06	2.1600794098414e-05	3750.25	-0.115	0.0750419	-1.53247	0.125406	0.178121	1255.94	-0.48466	0.133411	-3.63284	0.000280324	0.0025861	PTPRA
NM_001385408.1	62.9581	-0.285079	0.246882	-1.15472	0.248206	0.406431	1709.9	-0.475268	0.0764677	-6.21527	5.12363112255098e-10	4.11207994949877e-09	442.873	0.190901	0.19945	0.957136	0.338499	0.516134	NBPF15
NM_001385469.3	76.5877	-0.363147	0.230261	-1.57711	0.11477	0.232989	776.568	-0.254385	0.0970234	-2.62189	0.00874434	0.0170299	256.328	-0.128107	0.212934	-0.601628	0.547422	0.697512	NBPF11
NM_001385482.1	71.4144	0.155609	0.213344	0.72938	0.465769	0.6202	448.241	-0.173841	0.126518	-1.37404	0.169431	0.230698	179.191	0.328857	0.214124	1.53582	0.124582	0.265656	HAUS7
NM_001385682.1	2855.42	-0.138021	0.0719054	-1.91948	0.0549236	0.134252	7644.01	0.0020919	0.0718421	0.029118	0.97677	0.982718	4939.09	-0.148751	0.0936574	-1.58824	0.112231	0.246256	MAP4
NM_001385745.1	89.4514	-0.252377	0.213962	-1.17954	0.238183	0.394517	257.402	0.142017	0.151809	0.935499	0.349531	0.427008	158.565	-0.392003	0.240121	-1.63253	0.102569	0.231123	ZNF384
NM_001385875.1	42.4556	-0.0268943	0.270434	-0.0994488	0.920782	0.957965	575.336	-0.393875	0.114598	-3.43701	0.00058817	0.00152649	173.486	0.372426	0.240749	1.54695	0.121876	0.261092	ZFYVE27
NM_001385981.1	122.731	0.228102	0.179265	1.27243	0.203221	0.353645	1236.94	0.31622	0.105331	3.00214	0.0026809	0.00595465	409.223	-0.0824727	0.191369	-0.430961	0.666497	0.78633	PXN
NM_001385994.1	35.4611	0.884122	0.318524	2.77568	0.00550857	0.0221314	843.695	0.514625	0.112887	4.55876	5.14562714245781e-06	2.09075216632073e-05	223.675	0.362911	0.267112	1.35865	0.174259	0.331606	FAM13B
NM_001386135.1	308.796	0.118134	0.13204	0.894679	0.370959	0.534752	1706.68	0.589179	0.0825198	7.13985	9.34327237121936e-13	1.07269422714258e-11	725.012	-0.472347	0.146454	-3.22523	0.00125873	0.00843893	AFF3
NM_001386140.1	147.946	-0.00865399	0.158753	-0.0545122	0.956527	0.977389	168.641	0.087975	0.16583	0.530512	0.595757	0.665312	206.615	-0.0969453	0.190932	-0.507748	0.61163	0.74726	MTTP
NM_001386188.2	327.678	0.3052	0.118249	2.58099	0.00985185	0.0352634	854.507	0.672216	0.106337	6.32155	2.58947366830393e-10	2.16054402007893e-09	561.947	-0.374649	0.149435	-2.50711	0.0121724	0.0485744	CENPI
NM_001386298.1	144.658	0.762409	0.16184	4.71089	2.4664090247507e-06	3.19720064518369e-05	2573.38	0.742921	0.0869687	8.54239	1.3147480713427e-17	2.64424391341406e-16	724.368	0.0118374	0.159487	0.0742216	0.940834	0.965451	CIC
NM_001386393.1	188.675	-0.0491923	0.139277	-0.353197	0.723941	0.824378	1253.77	0.0695022	0.0893128	0.778189	0.436458	0.515275	488.638	-0.123546	0.142376	-0.867743	0.385535	0.559427	PANK2
NM_001386795.1	218.828	0.319893	0.144154	2.21911	0.0264791	0.0773462	946.873	0.776385	0.109366	7.09899	1.25672999543687e-12	1.42536523170208e-11	456.754	-0.465164	0.173122	-2.68691	0.00721157	0.03271	DTNA
NM_001386863.1	537.783	0.13086	0.0992605	1.31835	0.187386	0.334157	3294.24	0.0571472	0.0735682	0.776792	0.437281	0.51603	1332.19	0.062798	0.108714	0.577643	0.563505	0.710964	ACIN1
NM_001386888.1	1252.17	0.152956	0.0853084	1.79297	0.0729771	0.166329	6904.86	0.517916	0.0622631	8.31819	8.93186867999545e-17	1.63273009471413e-15	2936.42	-0.374221	0.0944317	-3.96287	7.40530549488827e-05	0.000887792	AFDN
NM_001386889.1	41.5659	0.516646	0.274502	1.88212	0.0598199	0.143028	516.955	0.526841	0.1232	4.27632	1.90008052759711e-05	6.85556270138197e-05	159.85	-0.0278367	0.248185	-0.112161	0.910696	0.947359	MBNL3
NM_001386928.1	214.136	-0.497886	0.146871	-3.38995	0.000699064	0.004181	1203.32	-0.491438	0.0885001	-5.55297	2.80860135468942e-08	1.73519674603869e-07	506.856	-0.0254946	0.154116	-0.165425	0.868609	0.922084	CHURC1
NM_001386936.1	324.831	0.166593	0.117361	1.4195	0.155754	0.2921	1443.63	0.264246	0.0854336	3.093	0.00198143	0.00454107	686.325	-0.112181	0.128009	-0.876356	0.380837	0.554997	SIPA1L1
NM_001387011.1	133.705	0.170228	0.164257	1.03635	0.300038	0.462659	566.518	-0.169326	0.116224	-1.45689	0.145148	0.201775	276.473	0.334272	0.181481	1.84191	0.065488	0.167892	AMBRA1
NM_001387048.1	144.015	-0.264673	0.173176	-1.52835	0.126426	0.250058	735.449	0.1135	0.0992845	1.14318	0.252966	0.325556	324.895	-0.371317	0.173668	-2.13808	0.03251	0.102323	SULF2
NM_001387283.1	1148.78	0.24329	0.10328	2.35563	0.0184911	0.0583104	421.154	0.421216	0.195415	2.1555	0.0311229	0.0523917	1411.61	-0.189616	0.330865	-0.573092	0.566582	0.713581	SMARCA4
NM_001387287.1	54.458	-0.07742	0.253802	-0.30504	0.760336	0.850837	213.788	0.376242	0.15394	2.44408	0.0145221	0.0266734	108.909	-0.453737	0.252276	-1.79857	0.0720863	0.179619	CENPL
NM_001387360.1	65.8458	0.255847	0.230126	1.11177	0.266238	0.426501	558.942	0.599248	0.105103	5.70152	1.18746445257465e-08	7.74871670204941e-08	196.864	-0.361653	0.205618	-1.75886	0.0786021	0.191166	TRIM9
NM_001387430.1	33.6226	0.754301	0.312051	2.41724	0.0156387	0.051114	898.445	-0.150179	0.0997221	-1.50598	0.132073	0.186241	233.358	0.888175	0.250586	3.5444	0.000393512	0.00341051	SH2B1
NM_001387552.1	519.341	0.0635311	0.101613	0.625229	0.531821	0.677147	1352.11	0.585418	0.0990476	5.91047	3.41122682580432e-09	2.42790612002137e-08	890.04	-0.531231	0.13406	-3.96264	7.41259209802302e-05	0.000887792	ADGRL3
NM_001387579.1	338.036	0.482252	0.12265	3.93195	8.42608846936983e-05	0.000695957	685.686	0.802783	0.111225	7.21765	5.2893465020426e-13	6.27793281305817e-12	537.211	-0.33059	0.155808	-2.12178	0.0338564	0.105807	DCAF1
NM_001387691.1	260.487	0.448336	0.134645	3.32976	0.000869221	0.00499669	3377.03	0.587686	0.0841911	6.98038	2.94385425622943e-12	3.17236059044059e-11	1031.7	-0.142563	0.148081	-0.962736	0.33568	0.513321	POM121
NM_001387844.1	1946.55	0.327596	0.0826064	3.96575	7.31666927020004e-05	0.000614556	3223.04	0.687512	0.0777733	8.83995	9.57612267106239e-19	2.1462230252405e-17	2936.39	-0.368561	0.110932	-3.32241	0.00089244	0.0064043	PRRC2C
NM_001387850.1	138.812	0.488255	0.176533	2.7658	0.00567838	0.0226318	229.321	0.771736	0.204753	3.76911	0.000163832	0.000483916	209.279	-0.287425	0.279339	-1.02895	0.303504	0.482222	FILIP1L
NM_001387994.1	1021.57	0.149152	0.0872061	1.71033	0.0872041	0.191608	3748.52	0.300255	0.0746964	4.01967	5.82791990540534e-05	0.000189548	1986.81	-0.160796	0.104775	-1.53468	0.124863	0.266139	BAG6
NM_001388.5	121.682	-0.225318	0.175676	-1.28258	0.199639	0.348961	550.198	-0.598933	0.106505	-5.62355	1.87073240590118e-08	1.17734592864296e-07	259.055	0.351631	0.175306	2.00581	0.0448764	0.129401	DRG2
NM_001388303.1	301.046	0.108728	0.117865	0.922482	0.356277	0.521195	1250.43	1.08632	0.100877	10.7688	4.83412666602723e-27	2.01669234725799e-25	617.263	-0.986187	0.144078	-6.84481	7.65767957249687e-12	9.35790639931792e-10	HECTD4
NM_001388306.1	524.97	0.913914	0.107036	8.53834	1.3615817541559e-17	1.0344341380898e-15	10008.3	0.354333	0.0683466	5.18435	2.1677318225415e-07	1.1452963052387e-06	2773.33	0.553251	0.115431	4.79291	1.64380012247834e-06	4.01782605520551e-05	MIDN
NM_001388419.1	67.8787	-0.0645373	0.22136	-0.291549	0.770631	0.857805	327.193	0.899711	0.168703	5.3331	9.65524214259502e-08	5.37770823104086e-07	148.949	-0.967007	0.26326	-3.6732	0.000239533	0.00227705	KALRN
NM_001388490.1	238.976	0.811156	0.130608	6.21059	5.27858698775678e-10	1.4248441687876e-08	4974.81	0.504125	0.0810968	6.21633	5.08901730828573e-10	4.08819340866767e-09	1353.43	0.30346	0.137662	2.20438	0.0274974	0.0902875	MAP7D1
NM_001388492.1	578.412	-0.106384	0.0995164	-1.06901	0.285065	0.445919	2395.6	0.526825	0.0761703	6.91641	4.63218184526616e-12	4.80731482882487e-11	1184.29	-0.638786	0.110717	-5.76953	7.9492198130574e-09	4.32437557830322e-07	HTT
NM_001389683.1	191.1	-0.158154	0.146494	-1.07959	0.280325	0.441309	1908.22	0.0828138	0.0945022	0.876316	0.380858	0.45922	633.28	-0.255455	0.160269	-1.59391	0.110956	0.244851	GOLGA3
NM_001391906.1	771.588	-0.0488377	0.0905198	-0.539525	0.589524	0.723753	2308.38	0.654035	0.0815675	8.01833	1.07195327924726e-15	1.75239887962649e-14	1387.49	-0.711473	0.110588	-6.43353	1.24670063635513e-10	1.10654523849963e-08	EIF4G3
NM_001391956.1	139.82	-0.066367	0.161766	-0.410265	0.681611	0.791849	547.767	0.118021	0.117521	1.00426	0.315253	0.391777	279.413	-0.185386	0.177874	-1.04223	0.297306	0.475419	USP54
NM_001391963.1	2084.46	0.0209419	0.0743665	0.281603	0.778248	0.863434	4767.14	-0.0301949	0.0704805	-0.428414	0.668349	0.730219	3428.77	0.0435815	0.0875954	0.497532	0.618814	0.752267	VDAC2
NM_001392073.1	61.291	-0.495232	0.251735	-1.96727	0.0491518	0.123546	341.326	-0.388534	0.127957	-3.03644	0.00239389	0.00539105	144.375	-0.123967	0.24858	-0.498699	0.617992	0.751944	KAT14
NM_001393381.1	44.6693	0.527296	0.28206	1.86944	0.0615611	0.14632	567.427	0.764494	0.131114	5.83077	5.51724821045385e-09	3.80162311279596e-08	174.383	-0.265203	0.268819	-0.986547	0.323865	0.502083	CRACD
NM_001393769.1	38.5059	0.736031	0.288888	2.54781	0.0108402	0.0381373	134.53	0.657601	0.208455	3.15464	0.00160695	0.00376685	73.423	0.0736785	0.317342	0.232174	0.816403	0.888246	MED12L
NM_001393918.1	45.6498	0.428782	0.267385	1.60361	0.1088	0.224605	1825	-0.258745	0.102396	-2.52691	0.0115071	0.0216839	447.976	0.654313	0.232116	2.8189	0.00481884	0.0238147	CBARP
NM_001393986.1	432.162	0.858669	0.131917	6.50915	7.55766199104381e-11	2.39600614926588e-09	1445.46	1.27706	0.100192	12.7461	3.27542096254275e-37	2.5092702228498e-35	810.315	-0.428606	0.175537	-2.44168	0.0146192	0.0559296	PRDM2
NM_001393997.1	435.424	0.397379	0.111113	3.57635	0.000348419	0.00232883	3633.23	-0.00456732	0.067537	-0.0676269	0.946083	0.959288	1287.94	0.397752	0.114554	3.47217	0.000516265	0.00415773	CCAR2
NM_001394.7	133.122	-0.387213	0.17295	-2.23887	0.0251645	0.0742001	2182.18	-0.386255	0.0961168	-4.0186	5.85445932365884e-05	0.000190264	625.833	0.00680237	0.176243	0.0385966	0.969212	0.982141	DUSP4
NM_001394014.1	291.127	0.173805	0.119171	1.45845	0.144717	0.277489	1623.63	0.390043	0.0863629	4.51633	6.29208632719246e-06	2.51534210053372e-05	686.607	-0.227466	0.128411	-1.7714	0.0764948	0.188008	CDC42BPA
NM_001394031.1	47.7056	-0.64507	0.263239	-2.45051	0.0142653	0.0476431	676.894	0.0284526	0.0984955	0.288872	0.772679	0.819762	201.54	-0.65968	0.221483	-2.97846	0.00289698	0.0159447	R3HDM2
NM_001394062.1	1814.94	-0.116181	0.0822464	-1.4126	0.157774	0.294881	5655.03	0.695383	0.0785168	8.85648	8.25813386358714e-19	1.8557678418253e-17	3312.35	-0.81973	0.109608	-7.47874	7.50395193273494e-14	1.45810548517635e-11	MACF1
NM_001394067.2	486.428	0.611376	0.108954	5.61135	2.00758553456438e-08	4.07951055734492e-07	2439.47	1.4096	0.120688	11.6797	1.61840291603321e-31	9.09828747125039e-30	1088.24	-0.805692	0.175847	-4.58177	4.61062235429937e-06	9.22305998318556e-05	RAPGEF2
NM_001394073.1	43.6477	-0.114617	0.271676	-0.421888	0.673107	0.786084	321.438	0.0347961	0.146129	0.238119	0.811788	0.851075	119.836	-0.172184	0.266588	-0.645882	0.518355	0.675336	HS6ST2
NM_001394098.1	158.869	0.523655	0.160067	3.27147	0.0010699	0.00598705	1946.83	0.676704	0.128237	5.27697	1.31340809692096e-07	7.17774969698632e-07	604.73	-0.160932	0.210266	-0.765371	0.444051	0.614844	RASSF8
NM_001394154.1	143.813	-0.2613	0.165851	-1.57552	0.115138	0.233403	1075.48	0.0913358	0.0867032	1.05343	0.292144	0.367283	398.417	-0.381951	0.157431	-2.42616	0.0152597	0.0579596	RGS12
NM_001394372.1	38.3234	0.288855	0.283466	1.01901	0.308198	0.472538	561.237	0.346907	0.144156	2.40648	0.0161072	0.0291654	165.736	-0.068002	0.280608	-0.242338	0.808518	0.883747	BICRA
NM_001394390.1	62.4997	0.162371	0.229109	0.708708	0.478506	0.630194	473.033	-0.0789361	0.109309	-0.722141	0.470208	0.546318	174.337	0.244285	0.206273	1.18428	0.236301	0.407963	STON2
NM_001394395.1	53.7183	-0.334465	0.24963	-1.33984	0.180297	0.324742	364.348	0.138192	0.157657	0.876537	0.380738	0.459142	140.716	-0.479532	0.27239	-1.76046	0.07833	0.190686	PPIP5K1
NM_001394674.1	313.4	-0.0366073	0.115465	-0.317043	0.751211	0.844324	767.176	-0.0320068	0.115534	-0.277034	0.781754	0.826564	526.503	-0.0127175	0.153063	-0.0830866	0.933783	0.960788	EMC3
NM_001394779.1	48.9492	-0.181215	0.25516	-0.710203	0.477578	0.629893	175.288	-0.660317	0.16115	-4.09752	4.17598958734811e-05	0.000139814	94.2364	0.467458	0.250888	1.86322	0.062432	0.162601	DYRK4
NM_001394796.1	271.459	-0.102033	0.134667	-0.757673	0.448647	0.606422	1140.5	-0.279511	0.0864703	-3.23245	0.00122736	0.00296614	559.043	0.17171	0.143857	1.19362	0.232627	0.40443	INTS14
NM_001394837.1	1238.41	-0.0990769	0.0801175	-1.23664	0.216219	0.369066	3654.55	0.419343	0.0708296	5.92045	3.21065604359111e-09	2.29874243664761e-08	2215.77	-0.528892	0.0909727	-5.81374	6.10915511766323e-09	3.52824629809153e-07	KLC1
NM_001394901.1	306.564	0.531164	0.134163	3.95909	7.52345200652633e-05	0.000629417	139.173	8.03653	1.97149	4.07638	4.57424724757859e-05	0.000151786	382.572	-7.48121	1.20125	-6.22787	4.72813218458016e-10	3.49715882284034e-08	LIMS3
NM_001394928.1	336.602	-0.469512	0.1208	-3.88669	0.000101618	0.000820046	495.707	-0.600271	0.152834	-3.92759	8.58018144179422e-05	0.000268593	494.32	0.11979	0.199635	0.600045	0.548476	0.698388	ITGA6
NM_001394955.1	130.586	-0.0136494	0.17224	-0.0792464	0.936837	0.965061	310.626	0.0535147	0.128207	0.41741	0.676379	0.737271	217.419	-0.0931201	0.185043	-0.503234	0.6148	0.749673	MAIP1
NM_001397.3	315.158	0.186548	0.116915	1.59558	0.110583	0.226841	2581.66	0.166883	0.0864486	1.93043	0.0535541	0.0845869	921.916	0.012859	0.133846	0.0960728	0.923463	0.955181	ECE1
NM_001398.3	191.171	0.201255	0.139302	1.44474	0.14853	0.282531	1376.52	-0.461659	0.0953028	-4.84413	1.27169622381039e-06	5.84966379806231e-06	517.967	0.656485	0.150611	4.35882	1.30765492332741e-05	0.000214935	ECH1
NM_001402.6	45277.1	0.272624	0.0852261	3.19883	0.00137988	0.00741179	255354	-0.323193	0.0584447	-5.52989	3.20433692623483e-08	1.9652800056318e-07	107370	0.587315	0.109403	5.36837	7.94516589090248e-08	3.03727347390872e-06	EEF1A1
NM_001404.5	3517.13	0.559706	0.0831345	6.73254	1.66724859914521e-11	5.98293933471982e-10	36703.5	-0.380283	0.0645096	-5.89497	3.74743390546753e-09	2.64043691650292e-08	11995.3	0.93119	0.104077	8.94709	3.64992457836533e-19	2.05174426965176e-16	EEF1G
NM_001407.3	162.672	-0.116737	0.153857	-0.75874	0.448008	0.606383	1485.76	0.318065	0.0858302	3.70574	0.000210773	0.000607036	509.086	-0.429936	0.150982	-2.84759	0.00440513	0.0222875	CELSR3
NM_001408.3	664.336	0.238406	0.0939822	2.53671	0.01119	0.0390745	4461.24	0.819267	0.0719566	11.3856	4.93419048252662e-30	2.56669278989209e-28	1731.04	-0.588491	0.103806	-5.66912	1.43534150188154e-08	7.16141984844091e-07	CELSR2
NM_001412.4	485.428	-0.103323	0.100617	-1.02689	0.304475	0.467693	2823.27	-0.0968622	0.0861105	-1.12486	0.260649	0.33427	1169.83	-0.0163465	0.122388	-0.133563	0.893748	0.937091	EIF1AX
NM_001414.4	298.208	-0.172049	0.127318	-1.35133	0.176589	0.32006	1527.25	-0.175907	0.0821557	-2.14114	0.0322629	0.0541377	673.629	-0.00387201	0.134159	-0.0288613	0.976975	0.986215	EIF2B1
NM_001415.4	1738.35	-0.394151	0.0776826	-5.07386	3.89820726911239e-07	5.98790198550542e-06	5595.25	-0.195045	0.0723761	-2.69488	0.00704137	0.0140444	3210.85	-0.208749	0.0963712	-2.16609	0.030304	0.096826	EIF2S3
NM_001416.4	699.275	0.227772	0.109139	2.08698	0.0368895	0.0997082	6292.3	-0.000922734	0.0819963	-0.0112534	0.991021	0.993261	2167.39	0.219288	0.138639	1.58172	0.113713	0.248336	EIF4A1
NM_001417.7	1262.34	0.39864	0.0880218	4.52888	5.92971480502786e-06	6.94064376656521e-05	8653.71	-0.027776	0.0653242	-0.425202	0.67069	0.732326	3326.34	0.41621	0.101264	4.11013	3.95435122777472e-05	0.00053918	EIF4B
NM_001418.4	3062.55	-0.169359	0.0698303	-2.42529	0.015296	0.0502889	33412.1	0.201811	0.0652775	3.09159	0.00199087	0.00456022	10762.7	-0.379933	0.0810135	-4.68975	2.73539592847759e-06	5.90191727995646e-05	EIF4G2
NM_001419.3	680.02	0.309201	0.0957957	3.22771	0.00124785	0.00681991	4563.95	0.126073	0.0651101	1.93631	0.0528294	0.0836673	1770.75	0.176809	0.0977998	1.80786	0.0706279	0.177348	ELAVL1
NM_001420.4	122.184	0.132535	0.207803	0.637794	0.523608	0.66984	1852.69	-0.0677681	0.0907557	-0.746709	0.455239	0.532746	541.95	0.196903	0.213544	0.922073	0.356491	0.531177	ELAVL3
NM_001423.3	477.177	0.874628	0.10349	8.4513	2.88085505720253e-17	2.16912952655258e-15	4617.22	1.11868	0.0903111	12.3869	3.07537024440541e-35	2.04064134248853e-33	1549.94	-0.25224	0.13342	-1.89058	0.058681	0.15538	EMP1
NM_001424.6	37.9677	0.187794	0.305478	0.614755	0.538716	0.682439	496.748	0.165155	0.136465	1.21024	0.226188	0.29506	151.331	0.00994269	0.289941	0.0342922	0.972644	0.983963	EMP2
NM_001425.3	54.6888	0.356078	0.239103	1.48923	0.136428	0.265765	467.794	-0.178026	0.158948	-1.12003	0.262702	0.336545	164.26	0.526766	0.271686	1.93888	0.0525165	0.143913	EMP3
NM_001426.4	91.4909	1.12946	0.208935	5.40582	6.45108837274737e-08	1.19041637302798e-06	1845.58	0.630547	0.098425	6.40637	1.49023018632818e-10	1.28538073492197e-09	505.424	0.485052	0.202017	2.40105	0.0163482	0.0608679	EN1
NM_001427.4	259.37	1.28458	0.136646	9.40078	5.41606057087976e-21	5.31088823188709e-19	12488.1	1.64832	0.0708732	23.2573	1.19903321661179e-119	6.31515807274221e-117	3008.06	-0.383624	0.133244	-2.8791	0.00398809	0.0205673	EN2
NM_001428.5	7766.12	0.085906	0.0663528	1.29469	0.195428	0.343952	28200.9	-0.0680764	0.0708234	-0.961214	0.336445	0.413358	15038.1	0.145234	0.0896438	1.62012	0.105207	0.235743	ENO1
NM_001429.4	812.305	0.250413	0.0885706	2.82727	0.00469461	0.0194831	2354.72	0.778889	0.0868819	8.96492	3.10505376447853e-19	7.35008091945523e-18	1444.21	-0.537386	0.115297	-4.66089	3.14845816916641e-06	6.58877945065727e-05	EP300
NM_001431.4	626.024	-0.176252	0.100684	-1.75055	0.0800238	0.179336	2305.16	-0.137608	0.0736288	-1.86894	0.0616311	0.0957885	1219.21	-0.0509934	0.111482	-0.457416	0.647372	0.77154	EPB41L2
NM_001436.4	636.119	0.0483137	0.0969806	0.498179	0.618358	0.74401	4148.74	-0.157397	0.0829774	-1.89687	0.0578458	0.0906071	1630.43	0.196168	0.123719	1.58559	0.112832	0.247117	FBL
NM_001440.4	214.311	0.0835072	0.135264	0.617366	0.536993	0.68128	4355.91	0.125095	0.0784225	1.59514	0.11068	0.159764	1190.4	-0.0506837	0.132783	-0.381703	0.702682	0.813428	EXTL3
NM_001444.3	702	-0.271333	0.115413	-2.35096	0.0187249	0.0588767	1537.12	-0.236991	0.0852349	-2.78045	0.00542839	0.0111819	1139.99	-0.0460715	0.14723	-0.312922	0.75434	0.849438	FABP5
NM_001446.5	3480.7	-0.182597	0.0766885	-2.38103	0.0172644	0.0552316	9051.3	-0.45807	0.0815588	-5.61644	1.94935514239733e-08	1.22354235963007e-07	5961.36	0.267237	0.111039	2.40669	0.0160977	0.0603134	FABP7
NM_001448.3	7003.78	0.143297	0.0774523	1.85014	0.0642937	0.151365	17880.2	0.326079	0.0697311	4.67623	2.92191276590249e-06	1.24232890404946e-05	11925.9	-0.191438	0.102757	-1.86302	0.06246	0.162601	GPC4
NM_001455.4	60.9059	0.223974	0.247114	0.90636	0.364745	0.529232	706.759	-0.31063	0.1045	-2.97253	0.0029536	0.00650548	223.172	0.514672	0.226785	2.26943	0.0232422	0.0792471	FOXO3
NM_001457.4	366.571	-0.492465	0.115577	-4.26094	2.03569772576384e-05	0.000203401	928.158	-0.434626	0.0947872	-4.58528	4.53381020478773e-06	1.85558128196922e-05	622.559	-0.0673805	0.135461	-0.497416	0.618896	0.752267	FLNB
NM_001458.5	842.485	0.27228	0.112971	2.41018	0.0159448	0.0518359	4026.05	0.994013	0.306829	3.23963	0.00119685	0.00290074	1841.74	-0.723774	0.343098	-2.10953	0.0348992	0.107949	FLNC
NM_001466.4	175.429	0.0821768	0.162782	0.504826	0.613681	0.741217	1331.39	-0.496395	0.139748	-3.55206	0.000382225	0.00103503	490.18	0.570744	0.231215	2.46845	0.0135698	0.052777	FZD2
NM_001469.5	3637.85	-0.0119463	0.0653468	-0.182813	0.854945	0.914246	10437.1	0.063565	0.0619763	1.02563	0.305064	0.381195	6443.33	-0.0842124	0.0677969	-1.24213	0.21419	0.381505	XRCC6
NM_001470.4	65.8712	-0.148912	0.245547	-0.606452	0.544215	0.685843	1662.17	-0.332981	0.0889938	-3.74162	0.00018284	0.000533701	435.881	0.225205	0.210383	1.07045	0.284416	0.461959	GABBR1
NM_001482.3	219.148	0.25127	0.140894	1.7834	0.0745213	0.16889	461.353	0.166219	0.127922	1.29938	0.193814	0.258756	351.818	0.0747217	0.177812	0.420228	0.674319	0.792188	GATM
NM_001483.3	308.314	-0.057336	0.120356	-0.476387	0.633799	0.756521	1593.81	-0.108603	0.0789798	-1.37507	0.169109	0.230371	699.75	0.0490332	0.122746	0.399469	0.689548	0.802965	NIPSNAP2
NM_001485.4	203.039	0.523757	0.162511	3.22291	0.00126896	0.00691286	4193.29	0.103175	0.131503	0.784582	0.432699	0.511423	1142.31	0.392778	0.305396	1.28613	0.198398	0.362019	GBX2
NM_001487.4	116.161	-0.00785558	0.176548	-0.0444953	0.96451	0.981621	1026.12	-0.4008	0.130657	-3.06758	0.00215803	0.0049018	355.895	0.382551	0.216599	1.76618	0.0773664	0.189307	BLOC1S1
NM_001493.3	972.918	0.320653	0.0955674	3.35525	0.000792927	0.00463235	7526.4	-0.176368	0.0657575	-2.6821	0.00731606	0.0145099	2749.24	0.486946	0.108932	4.4702	7.81481066487896e-06	0.000141404	GDI1
NM_001494.4	4431.69	-0.20234	0.0741647	-2.72826	0.00636698	0.0248693	7342.08	0.0261641	0.0688466	0.380035	0.70392	0.761578	6685	-0.237033	0.0926573	-2.55817	0.0105225	0.0436212	GDI2
NM_001497.4	39.9048	-0.0742858	0.287587	-0.258308	0.79617	0.876514	382.172	0.0631332	0.117207	0.538645	0.590132	0.66008	128.709	-0.114564	0.24745	-0.462981	0.643378	0.769171	B4GALT1
NM_001498.4	80.1747	-0.577082	0.21496	-2.6846	0.00726174	0.0276471	312.465	-0.144744	0.131846	-1.09782	0.272283	0.346083	159.851	-0.434383	0.219244	-1.98128	0.04756	0.134799	GCLC
NM_001500.4	50.6514	-0.339723	0.259908	-1.30709	0.191183	0.33885	236.954	-0.453655	0.157831	-2.8743	0.0040492	0.00860378	109.567	0.100033	0.266818	0.374913	0.707725	0.817383	GMDS
NM_001510.4	37.8834	-0.170046	0.301422	-0.564146	0.572655	0.710385	59.2071	0.191809	0.305119	0.628636	0.529587	0.60276	56.3737	-0.362556	0.385861	-0.939604	0.347421	0.52349	GRID2
NM_001512.4	300.312	-0.286282	0.122834	-2.33064	0.0197722	0.06155	1022.53	-0.427632	0.0892595	-4.79088	1.66052126654492e-06	7.47500679122545e-06	566.698	0.13257	0.131087	1.01131	0.311866	0.490723	GSTA4
NM_001514.6	213.596	-0.108251	0.138208	-0.783242	0.433485	0.592284	386.573	0.25294	0.120086	2.10632	0.0351767	0.0583492	329.249	-0.369128	0.15586	-2.36833	0.0178685	0.064706	GTF2B
NM_001516.5	246.406	-0.767491	0.133013	-5.77003	7.92578416306607e-09	1.76820470495069e-07	1221.8	-0.759752	0.0896084	-8.47858	2.27954018812819e-17	4.45700351864415e-16	547.907	-0.00987271	0.139654	-0.0706942	0.943641	0.966895	GTF2H3
NM_001519.4	46.2395	0.488683	0.264306	1.84893	0.0644685	0.151449	728.867	-0.353495	0.0994792	-3.55346	0.000380202	0.00103026	211.061	0.830203	0.219436	3.78336	0.000154728	0.00158526	BRF1
NM_001520.4	713.641	0.134426	0.102976	1.30541	0.191753	0.339504	2376.34	0.237706	0.0745089	3.1903	0.00142123	0.00337563	1335.51	-0.113787	0.122572	-0.928327	0.353238	0.528934	GTF3C1
NM_001527.4	3735.78	-0.0995911	0.0768659	-1.29565	0.195097	0.34362	5967.5	0.173857	0.0677291	2.56695	0.0102598	0.0195609	5587.47	-0.282755	0.0952805	-2.96761	0.00300128	0.0163586	HDAC2
NM_001530.4	2018.49	-0.0730514	0.0779457	-0.937208	0.348652	0.51312	3295.88	0.349232	0.0866852	4.02874	5.60760515883112e-05	0.000183018	3034.61	-0.431445	0.112942	-3.82007	0.000133412	0.00140566	HIF1A
NM_001533.3	3299.63	0.21571	0.0749503	2.87804	0.00400152	0.0172343	7431.4	0.0624803	0.0712063	0.877455	0.38024	0.458672	5402.91	0.145226	0.0953352	1.52332	0.127679	0.270034	HNRNPL
NM_001536.6	1124.11	0.191805	0.0844306	2.27175	0.0231017	0.0697267	5852.2	-0.00623798	0.0721277	-0.0864852	0.931081	0.947268	2560.39	0.191657	0.101004	1.89751	0.0577604	0.153717	PRMT1
NM_001537.4	462.263	-0.0824484	0.112516	-0.732772	0.463698	0.619218	4305.54	-0.0945861	0.0730787	-1.2943	0.19556	0.260633	1464.4	-0.00213218	0.123283	-0.0172951	0.986201	0.991256	HSBP1
NM_001539.4	2024.1	0.298884	0.0866216	3.45045	0.00055965	0.00347535	5662.79	0.378228	0.0906798	4.17103	3.0322685872e-05	0.000104298	3553.77	-0.0865747	0.130688	-0.662454	0.50768	0.66689	DNAJA1
NM_001540.5	285.914	0.10272	0.119448	0.859956	0.389813	0.551866	4246.67	-0.38875	0.111264	-3.49393	0.000475958	0.00126248	1248.92	0.481899	0.167607	2.87518	0.00403797	0.0207611	HSPB1
NM_001543.5	135.528	0.419963	0.15878	2.64494	0.00817059	0.0304609	4660.59	0.476983	0.0672006	7.0979	1.26667352974572e-12	1.43278628659962e-11	1166.34	-0.0653224	0.134073	-0.487214	0.626107	0.756893	NDST1
NM_001545.3	95.1839	-0.27275	0.188648	-1.44582	0.148229	0.282262	498.268	-0.528364	0.108893	-4.85213	1.22143124142475e-06	5.63382653064386e-06	217.374	0.239335	0.181801	1.31646	0.188019	0.34977	MRPL58
NM_001546.4	169.425	2.49049	0.186631	13.3445	1.27536247631601e-40	3.98338213436034e-38	8629.06	1.83909	0.0969941	18.9608	3.59544507008032e-80	8.41633766821302e-78	2067.23	0.644499	0.200404	3.21599	0.00129994	0.00864524	ID4
NM_001550.4	193.608	0.265226	0.140542	1.88716	0.0591382	0.141881	1615.54	0.395008	0.0827328	4.7745	1.80152344697999e-06	8.02825916853536e-06	572.759	-0.147117	0.137711	-1.0683	0.285384	0.462781	IFRD1
NM_001551.3	143.588	0.285263	0.164839	1.73056	0.0835306	0.185226	790.74	-0.0889334	0.119209	-0.74603	0.455649	0.533097	336.375	0.359651	0.193456	1.85908	0.0630155	0.163693	IGBP1
NM_001553.3	56.8493	-0.434296	0.245663	-1.76785	0.0770853	0.173813	367.113	-0.598935	0.148341	-4.03756	5.40108103239688e-05	0.000176856	144.858	0.164675	0.259257	0.635178	0.525312	0.681451	IGFBP7
NM_001554.5	2901.98	1.23395	0.0853564	14.4564	2.2841137815275e-47	7.4084351998544e-45	10806.6	1.19806	0.0813223	14.7322	4.00395061373853e-49	4.62209477013351e-47	5678.99	0.0275764	0.12323	0.22378	0.822928	0.892812	CCN1
NM_001556.3	85.3009	0.111557	0.202763	0.550182	0.582194	0.71747	758.333	-0.00211093	0.101656	-0.0207654	0.983433	0.988005	262.39	0.120523	0.1903	0.63333	0.526518	0.68249	IKBKB
NM_001560.3	217.653	-0.341103	0.140893	-2.42102	0.0154771	0.0507065	1194.85	-0.215338	0.083968	-2.56453	0.0103317	0.0196757	509.074	-0.131219	0.139845	-0.938316	0.348082	0.523818	IL13RA1
NM_001567.4	221.276	0.212656	0.133262	1.59577	0.11054	0.226841	3237.75	0.477545	0.0679321	7.02973	2.06926764710665e-12	2.27349654004794e-11	956.332	-0.260643	0.11966	-2.1782	0.0293914	0.0948606	INPPL1
NM_001568.3	936.122	0.198308	0.0885888	2.23853	0.0251868	0.0742399	5495.31	0.0300986	0.0801212	0.375663	0.707167	0.764209	2266.88	0.160357	0.112766	1.42204	0.155016	0.306732	EIF3E
NM_001569.4	53.8605	0.194851	0.26112	0.746212	0.455539	0.612391	2070.87	0.286191	0.0922694	3.10169	0.00192419	0.00441829	510.876	-0.0735959	0.219642	-0.335073	0.73757	0.837038	IRAK1
NM_001571.6	79.7007	0.257717	0.20232	1.27381	0.20273	0.353138	960.168	-0.141592	0.0955883	-1.48127	0.138536	0.194024	299.709	0.381157	0.184562	2.0652	0.0389038	0.116781	IRF3
[truncated: 6,434 more rows]
