# Supplementary material for: eIF3 engages with 3’-UTR termini of highly translated mRNAs
Source: bioRxiv preprint, doi:10.1101/2023.11.11.566681, version 4 (2024-11-24)
Supplement: Supplementary File 5 [file 566681_file06.xlsx]

## Sheet: SantiNPC.DESeq2normalized.mRNAc
transcript	mRNA_Undiff_1	mRNA_Undiff_2	mRNA_Undiff_3	mRNA_Diff_1	mRNA_Diff_2	mRNA_Diff_3
NM_000014.6	20635.1	18349.6	21699.4	27534.8	28402.2	27813
NM_000016.6	1652.86	1704.58	1827.97	1457.14	1244.48	1356.3
NM_000018.4	1177.71	1216.56	1192	977.154	1166.95	1087.37
NM_000019.4	850.985	865.82	844.041	647.218	810.68	779.78
NM_000021.4	1552.49	1768.72	1515.28	1595.45	1540.88	1442.64
NM_000026.4	2484.62	2405.06	2231.18	2163.12	2206.3	2124.38
NM_000027.4	202.87	242.51	216.3	166.324	122.682	167.288
NM_000038.6	1088.02	1195.51	1222.57	1107.32	1164	1146.73
NM_000043.6	174.041	204.43	188.087	125.647	122.682	116.023
NM_000044.6	981.249	903.9	1079.15	807.215	850.919	858.927
NM_000046.5	1007.94	1099.31	1115.59	1208.56	1074.69	1198.9
NM_000048.4	518.92	447.942	426.723	258.526	332.712	342.671
NM_000051.4	1171.31	1101.31	1200.23	1423.7	1465.31	1350
NM_000052.7	185.786	235.495	300.939	403.155	392.581	367.855
NM_000053.4	163.364	169.356	191.614	178.979	181.569	199.667
NM_000055.4	566.968	641.348	661.832	683.375	751.792	778.88
NM_000057.4	786.921	689.449	767.631	598.405	736.089	678.148
NM_000059.4	767.702	725.525	627.741	305.53	331.731	297.701
NM_000062.3	3158.36	3144.61	2616.76	3072.48	2921.78	2862.79
NM_000067.3	512.513	438.923	454.936	1751.83	1262.15	1497.5
NM_000071.3	2202.74	2239.71	2200.62	1693.07	2004.13	2009.26
NM_000075.4	6422.43	6738.16	6814.63	5162.38	5629.61	5732.78
NM_000077.5	669.47	993.087	700.625	307.338	497.596	548.634
NM_000081.4	171.905	135.284	137.539	1112.74	475.023	449.7
NM_000082.4	547.748	524.102	383.228	465.527	476.986	413.724
NM_000088.4	2169.64	1991.19	2422.8	3083.32	3419.38	3680.34
NM_000089.4	1404.07	1374.89	1574.05	1480.65	1528.12	1573.95
NM_000090.4	276.544	227.478	302.115	327.225	358.23	353.464
NM_000096.4	341.675	339.714	485.5	531.514	480.912	508.161
NM_000097.7	417.485	465.979	419.669	427.562	335.657	363.358
NM_000098.3	775.176	662.392	679.465	252.198	323.879	348.068
NM_000099.4	3288.63	3399.14	2826.01	2473.17	2534.11	2591.17
NM_000100.4	1035.7	1162.44	1230.8	685.183	809.698	804.064
NM_000108.5	1783.12	1709.59	1719.82	1470.7	1593.88	1557.76
NM_000110.4	28.8289	63.1327	108.15	75.0267	71.646	76.449
NM_000112.4	626.761	675.42	724.136	366.998	467.171	433.511
NM_000113.3	1331.47	1241.61	1239.02	1371.27	1240.56	1235.78
NM_000117.3	2353.29	2290.82	2249.99	1533.07	1369.13	1505.6
NM_000122.2	1072.01	1095.3	1135.58	1302.57	1242.52	1188.11
NM_000123.4	550.952	613.289	596.001	516.147	519.188	475.783
NM_000124.4	124.925	113.238	111.677	76.8345	103.052	99.8334
NM_000126.4	1694.5	1651.47	1561.12	1368.56	1467.27	1423.75
NM_000127.3	1128.6	954.005	1068.57	1206.75	1231.72	1135.94
NM_000135.4	1128.6	1071.25	1016.85	949.132	978.508	833.744
NM_000136.3	778.379	809.702	812.301	807.215	815.587	802.265
NM_000137.4	379.046	417.878	351.488	230.504	238.493	267.122
NM_000138.5	445.246	371.781	449.058	596.598	528.021	523.451
NM_000140.5	762.363	738.552	828.759	541.457	519.188	549.533
NM_000141.5	153.754	172.362	190.438	466.431	367.063	359.76
NM_000142.5	1516.18	1317.77	1274.29	3373.49	3111.2	3512.16
NM_000143.4	1390.19	1462.07	1543.49	1368.56	1302.39	1269.05
NM_000144.5	364.098	424.893	303.291	283.836	390.618	337.275
NM_000146.4	36277.4	39815.7	28949	27053.9	27498.3	27683.5
NM_000152.5	679.08	602.266	737.067	611.061	629.111	693.437
NM_000153.4	705.773	731.538	847.568	704.166	660.517	667.355
NM_000156.6	634.235	718.51	819.355	451.968	534.891	575.616
NM_000157.4	1176.64	1010.12	1059.17	731.284	905.88	909.293
NM_000158.4	353.421	372.784	400.861	381.461	292.473	323.784
NM_000159.4	526.394	509.07	478.447	380.557	414.173	429.913
NM_000165.5	11184.5	10437.9	10976.1	14864.3	12663.7	12481.9
NM_000168.6	2845.52	2535.33	2902.42	4274.71	4296.8	4384.57
NM_000169.3	290.424	290.611	270.375	337.168	311.12	312.092
NM_000170.3	1830.1	1916.03	1914.96	1450.82	1513.4	1434.54
NM_000175.5	3780.85	3790.97	3553.67	3174.62	3303.57	3480.68
NM_000176.3	449.517	414.872	424.372	324.513	275.788	262.625
NM_000178.4	1301.57	1217.56	1066.22	893.088	1053.1	1075.68
NM_000179.3	2240.11	2333.91	2467.47	2531.02	2762.79	2703.6
NM_000181.4	633.167	632.329	552.506	568.576	570.224	536.942
NM_000182.5	3664.47	3590.55	3541.92	3361.74	3426.25	3392.54
NM_000183.3	1985.99	2012.23	1900.86	1818.72	1708.71	1737.64
NM_000186.4	51.2513	52.1095	65.8305	67.7952	71.646	60.2598
NM_000188.3	2304.17	2529.32	2641.45	2090.8	2585.15	2486.84
NM_000189.5	621.422	686.443	795.844	427.562	523.114	494.67
NM_000190.4	496.497	554.165	559.559	417.618	502.504	518.054
NM_000191.3	571.239	665.399	665.358	251.294	320.935	315.689
NM_000194.3	687.622	772.624	760.577	483.606	464.227	482.078
NM_000195.5	726.06	737.55	674.763	560.44	651.684	596.302
NM_000199.5	486.888	562.182	497.255	244.063	376.878	340.873
NM_000202.8	4942.55	4778.04	5344.03	6081.68	5775.85	5689.6
NM_000204.5	71.5383	47.099	59.9528	81.3542	60.85	61.1592
NM_000210.4	338.472	209.44	424.372	299.203	309.157	323.784
NM_000213.5	175.109	176.371	204.545	264.853	183.532	253.631
NM_000214.3	3302.51	3448.25	3564.25	10257	8083.24	8466.05
NM_000215.4	658.793	694.46	603.054	358.862	392.581	380.446
NM_000232.5	2105.58	2364.97	2304.07	2270.69	2057.12	2089.31
NM_000234.3	1745.75	1846.88	1832.67	1649.68	1625.28	1726.85
NM_000235.4	1350.69	1584.33	1405.95	809.926	1017.77	949.766
NM_000237.3	5787.13	6237.11	6002.33	3339.14	6187.07	5795.73
NM_000249.4	1340.01	1267.66	1409.48	1202.23	1134.56	1161.13
NM_000251.3	1872.81	1769.72	1969.04	2188.43	2115.03	2018.25
NM_000252.3	350.217	300.632	330.328	367.902	394.544	363.358
NM_000254.3	1092.29	1203.53	1027.43	969.923	933.361	1071.19
NM_000255.4	588.322	598.258	728.838	595.694	531.947	548.634
NM_000262.3	830.698	886.864	888.712	674.336	785.162	760.892
NM_000264.5	861.663	748.573	1027.43	1046.76	1498.68	1827.58
NM_000268.4	962.03	1227.58	1014.5	1044.05	874.474	981.245
NM_000269.3	4442.85	4840.17	3849.91	3642.86	3836.5	3849.43
NM_000270.4	405.74	483.015	457.287	373.325	338.601	368.754
NM_000271.5	576.577	563.184	672.412	1274.55	1036.41	1086.48
NM_000274.4	775.176	785.651	797.019	744.843	804.791	773.484
NM_000276.4	875.543	842.771	907.52	968.115	1018.75	856.229
NM_000281.4	763.431	893.879	725.311	567.672	565.316	634.976
NM_000282.4	249.85	272.573	315.046	307.338	376.878	321.086
NM_000284.4	1762.83	1883.96	1718.65	1513.19	1560.51	1642.3
NM_000285.4	838.173	750.578	856.972	801.791	863.678	871.519
NM_000289.6	1876.01	1885.96	2130.09	1849.45	1986.46	1972.38
NM_000291.4	5459.33	5465.49	5863.62	4833.34	5191.88	5140.97
NM_000292.3	257.324	245.516	283.306	327.225	249.289	241.939
NM_000293.3	1882.42	1808.8	1859.71	1870.24	1960.94	1644.1
NM_000297.4	1631.5	1615.4	1550.54	1159.75	1359.31	1266.36
NM_000302.4	2046.85	2047.3	2362.84	1914.54	2039.46	1895.04
NM_000303.3	629.964	638.342	608.932	668.008	627.148	691.639
NM_000304.4	1722.26	1944.09	1711.59	2263.45	1954.07	1929.21
NM_000305.3	6113.86	5958.52	5737.83	6651.16	6371.59	6050.26
NM_000307.5	818.953	846.78	861.674	1536.69	1316.13	1394.97
NM_000308.4	1423.29	1336.81	1274.29	1115.46	1034.45	1180.91
NM_000310.4	3211.75	3257.85	3131.65	2645.82	2563.55	2637.04
NM_000311.5	974.843	1027.16	914.574	1312.51	1346.55	1268.15
NM_000313.4	787.989	751.58	807.599	749.363	763.57	694.337
NM_000314.8	1878.15	1953.11	2038.39	1888.32	1938.37	2010.16
NM_000317.3	403.604	519.091	349.137	366.998	351.36	337.275
NM_000318.3	719.654	772.624	735.891	573.095	620.278	630.479
NM_000320.3	1449.99	1534.22	1507.05	1003.37	1005.01	1040.61
NM_000321.3	1158.49	1301.74	1570.53	2142.33	1889.3	1891.44
NM_000328.3	160.16	123.259	115.203	197.058	175.68	160.993
NM_000329.3	268.002	208.438	251.567	126.551	162.921	124.117
NM_000344.4	1256.73	1056.22	1170.84	899.416	903.917	966.855
NM_000346.4	1536.47	1697.57	1403.6	2646.72	3237.81	3224.35
NM_000355.4	1591.99	1447.04	1568.18	1174.21	1290.61	1287.94
NM_000365.6	12798.9	14036.5	11364	9926.12	10777.3	11286.6
NM_000367.5	519.987	555.167	576.017	417.618	477.967	490.173
NM_000368.5	949.217	775.63	831.11	1206.75	1116.89	1019.02
NM_000373.4	1102.97	1120.35	1094.43	1029.58	1124.74	1027.11
NM_000374.5	1246.05	1210.54	1050.94	919.303	961.823	1000.13
NM_000380.4	262.663	351.739	279.78	242.255	225.734	203.264
NM_000381.4	3642.05	3272.88	3345.6	7635.54	6350	6180.68
NM_000382.3	990.859	845.778	982.755	736.708	807.735	804.064
NM_000386.4	1319.72	1285.7	1318.96	1496.92	1529.1	1442.64
NM_000387.6	312.847	263.554	265.673	179.883	185.494	179.88
NM_000389.5	6359.43	6059.74	6143.4	3958.33	4316.43	4416.05
NM_000390.4	316.05	249.524	319.748	447.448	468.153	412.825
NM_000391.4	1853.59	1773.73	1843.25	1637.03	1527.14	1530.78
NM_000393.5	6890.1	7124.98	8600.28	9441.61	9206.02	8838.4
NM_000398.7	5237.24	5485.53	5479.21	4160.82	4504.87	4653.5
NM_000399.5	330.998	418.88	410.265	1042.24	807.735	872.418
NM_000400.4	1116.85	1095.3	1200.23	1053.99	1066.84	1033.41
NM_000404.4	856.324	949.997	949.84	834.333	869.567	808.561
NM_000405.5	1271.67	1377.9	1050.94	1001.56	910.788	919.187
NM_000408.5	794.395	819.723	895.765	837.948	813.624	854.43
NM_000414.4	1516.18	1555.27	1602.27	1814.2	1742.08	1752.93
NM_000416.3	493.294	501.053	559.559	525.187	517.225	488.374
NM_000426.4	446.314	395.832	464.34	536.034	674.258	614.29
NM_000430.4	4621.16	4657.79	4867.93	6201.9	5642.37	5867.69
NM_000431.4	948.149	1016.14	976.878	1791.6	1760.73	1741.24
NM_000434.4	1180.92	1223.57	1186.12	1362.23	1406.42	1332.01
NM_000435.3	5355.76	5117.76	5634.39	15113.8	14692.3	16034.5
NM_000436.4	972.707	1024.15	988.633	1049.47	1014.82	1066.69
NM_000454.5	4078.75	4463.38	4056.8	3058.92	3573.47	3404.23
NM_000455.5	1590.93	1748.68	1802.11	1347.77	1481.01	1825.78
NM_000465.4	768.77	820.725	912.223	582.135	858.771	665.556
NM_000466.3	420.688	378.796	378.525	290.163	318.972	293.204
NM_000476.3	557.358	576.211	576.017	447.448	474.041	478.481
NM_000484.4	14211.6	13985.4	16016.8	14119.5	15920.1	15439.1
NM_000485.3	849.918	959.016	873.43	480.894	649.721	800.466
NM_000489.6	1297.3	1341.82	1487.06	2761.52	2601.83	2387.01
NM_000516.7	29667	30886.9	29416.8	39602.3	33393.9	33255.3
NM_000520.6	1256.73	1370.88	1286.05	1027.77	989.304	1061.29
NM_000521.4	886.221	894.881	867.552	805.407	894.103	837.341
NM_000527.5	2086.36	2069.35	2158.3	7923	6604.19	6978.44
NM_000528.4	951.353	1124.36	1016.85	1068.45	1238.59	1221.39
NM_000532.5	1047.45	964.026	1033.3	857.835	911.769	916.489
NM_000533.5	256.257	254.535	249.215	476.374	430.858	382.245
NM_000534.5	380.114	381.803	430.249	563.152	502.504	504.563
NM_000535.7	1026.09	984.068	885.185	636.371	746.885	708.727
NM_000543.5	800.802	956.009	921.627	804.503	761.607	700.633
NM_000546.6	3654.86	3529.42	3507.83	2132.38	2176.86	2078.51
NM_000548.5	1240.71	1152.42	1125	1566.52	1329.87	1452.53
NM_000551.4	1927.26	2313.86	1628.13	1394.77	1430.96	1487.61
NM_000553.6	522.123	443.933	566.613	592.982	582.983	551.332
NM_000581.4	5471.08	5993.6	5013.7	3306.6	3668.67	3787.37
NM_000597.3	13771.7	14304.1	15273.9	9360.25	11334.8	11633.7
NM_000598.5	3372.98	3171.67	3105.79	3057.11	3146.54	3303.5
NM_000599.4	6033.78	6166.96	6537.2	5227.46	5713.03	5989.1
NM_000602.5	1474.54	1169.46	1088.55	4907.47	3581.32	3869.22
NM_000610.4	1709.45	1715.61	1571.7	1246.53	1132.6	1110.76
NM_000611.6	1674.21	1629.42	1517.63	1594.54	1460.4	1466.92
NM_000617.3	862.731	865.82	879.307	678.856	829.327	779.78
NM_000629.3	1300.5	1335.81	1053.29	1503.24	1519.29	1423.75
NM_000636.4	1973.18	2207.64	2249.99	1576.46	1634.12	1729.55
NM_000637.5	2047.92	2051.31	1800.93	1968.77	1919.72	2038.94
NM_000640.3	104.638	87.1833	84.6392	103.953	91.2751	76.449
NM_000642.3	276.544	287.605	355.014	436.601	377.859	425.416
NM_000660.7	604.338	575.209	463.165	1512.28	1171.85	1224.98
NM_000661.5	19626.1	21789.8	19201.3	14011.9	15194.8	15132.4
NM_000666.3	301.101	372.784	312.695	223.272	176.661	221.252
NM_000671.4	4994.87	5221.98	5248.81	3992.68	4046.53	4023.92
NM_000687.4	5456.13	5769.13	5677.88	4836.96	5026.02	4855.86
NM_000688.6	616.084	645.357	572.49	770.153	795.958	762.691
NM_000690.4	794.395	673.415	761.753	673.432	615.371	635.876
NM_000692.5	1155.29	1198.52	1215.51	612.868	702.72	820.253
NM_000696.4	1148.88	1187.5	1264.89	827.101	845.03	944.37
NM_000700.3	3732.8	3881.16	4140.27	2836.55	2702.92	2684.71
NM_000701.8	4418.29	4525.51	4999.59	6226.31	5899.51	5986.41
NM_000709.4	361.962	397.836	398.51	255.814	329.768	292.305
NM_000712.4	540.274	612.287	498.431	393.212	410.247	398.434
NM_000713.3	316.05	283.596	350.312	169.94	177.643	205.063
NM_000722.4	461.262	500.051	520.766	449.256	459.32	414.623
NM_000754.4	1489.49	1539.24	1283.69	1130.82	1056.04	1134.14
NM_000755.5	747.415	660.388	733.54	583.038	655.61	653.864
NM_000757.6	365.166	379.798	358.541	248.582	211.994	248.234
NM_000783.4	367.301	377.794	420.845	604.733	462.264	482.078
NM_000786.4	3666.6	3684.75	3875.77	9553.7	7473.76	7469.52
NM_000788.3	1032.5	1096.3	1364.81	1096.47	984.397	956.962
NM_000791.4	7879.89	7125.98	6975.68	6652.97	6189.04	6390.24
NM_000801.5	4463.14	4548.56	3856.96	3656.42	3670.63	3720.82
NM_000819.5	1698.77	1550.26	1706.89	1837.7	1785.26	1821.28
NM_000821.7	562.697	604.27	594.826	774.673	722.349	736.609
NM_000824.5	88.6221	93.1959	101.097	145.534	136.422	155.596
NM_000827.4	7123.93	6761.21	6465.5	6127.78	6018.26	5934.24
NM_000829.4	556.29	539.133	591.299	596.598	626.166	612.491
NM_000834.5	783.718	730.536	777.035	1550.25	1156.15	1192.6
NM_000840.3	222.089	261.55	275.077	117.512	216.901	179.88
NM_000848.4	540.274	595.251	633.619	492.645	473.06	548.634
NM_000849.5	192.192	202.425	193.965	184.403	200.216	219.454
NM_000850.5	400.401	342.72	390.281	298.299	350.378	324.683
NM_000852.4	12970.9	13904.2	11463.9	10990	12010	11709.3
NM_000855.3	760.228	624.312	934.558	1404.72	1116.89	1018.12
NM_000857.5	85.4189	59.1243	97.5702	103.953	75.5718	106.129
NM_000858.7	3603.61	3804	3302.11	2284.25	2322.12	2355.53
NM_000859.3	9093.91	8094.01	8553.26	18638.2	15760.2	15730.5
NM_000875.5	3024.9	2882.06	3062.29	10210	5984.9	6228.34
NM_000876.4	3443.45	3181.69	3564.25	4817.98	4508.79	4495.2
NM_000884.3	3450.92	3616.6	3652.42	3204.45	3343.81	3427.61
NM_000885.6	497.565	542.14	551.33	478.182	570.224	462.292
NM_000891.3	390.791	288.607	365.594	567.672	354.304	430.813
NM_000895.3	976.978	1129.37	1100.31	904.84	986.359	956.962
NM_000901.5	224.225	230.484	228.056	248.582	240.456	255.43
NM_000903.3	2936.27	3076.47	2880.08	2098.03	2661.7	2555.2
NM_000904.6	542.41	515.083	489.027	385.077	444.598	396.635
NM_000918.4	12282.2	12913.1	12519.6	11080.4	11493.8	11682.3
NM_000921.5	1594.13	1735.65	1925.54	3015.53	2599.87	2495.83
NM_000922.4	342.743	296.623	373.823	397.732	340.564	348.967
NM_000925.4	1312.25	1260.65	1264.89	1082.01	1266.07	1249.27
NM_000930.5	3461.6	3484.32	3557.2	5709.26	4900.39	5428.78
NM_000932.5	692.961	657.382	722.96	764.73	876.437	919.187
NM_000938.3	2062.87	2071.35	2198.27	2626.84	2778.49	2785.44
NM_000941.3	1181.98	1211.55	1398.9	1106.42	1157.13	1217.79
NM_000942.5	8151.1	9168.27	7591.67	6492.97	7404.08	7322.91
NM_000944.5	129.196	164.345	161.05	201.578	156.051	162.791
NM_000945.4	1577.05	1512.18	1480.01	2890.79	2565.52	2495.83
NM_000946.3	485.82	430.906	496.08	373.325	362.156	363.358
NM_000947.5	375.843	402.847	436.127	474.566	455.394	438.008
NM_000964.4	676.944	671.411	605.406	1276.36	1325.94	1454.33
NM_000967.4	51424.3	54471.5	51759.2	39389.9	38530.8	38746.1
NM_000968.4	42705.2	42860.1	38075.9	37062.3	34530.4	33534.1
NM_000969.5	20878.5	21303.8	19517.6	17889.8	16977.2	17367.4
NM_000970.6	33719.1	35330.3	29039.5	27613.4	27849.7	27053.9
NM_000971.4	27220.9	29752.5	25076.7	21583.3	20609.5	20420
NM_000972.3	33365.7	36006.7	32796.5	25557.9	26473.7	27381.3
NM_000975.5	16302.2	18700.3	15698.2	11911.2	13529.3	12949.6
NM_000976.4	16021.4	17097.9	12541.9	11576.7	12016.9	12464.8
NM_000977.4	39774.2	44229	35802.4	28212.7	29476.9	31112.9
NM_000978.4	18645.9	20297.7	13002.7	16032.2	15466.7	15771.9
NM_000979.4	19752	22296.9	16535.2	14354.5	15027	16021.9
NM_000980.4	25857.4	28480.9	20070.1	20212.9	20541.8	21593.7
NM_000981.4	23140	24960.5	17744.8	17663.8	18353.2	18769.6
NM_000982.4	18147.2	19303.6	12708.8	13040.2	13671.6	14429.1
NM_000983.4	8939.08	10304.7	8416.9	6280.54	6896.66	7323.81
NM_000984.6	17207.6	18839.6	14989.4	12152.5	13783.5	14753.8
NM_000986.4	13517.5	15442.5	10876.1	10233.5	10389.7	10689.4
NM_000987.5	17957.2	19332.6	11998.8	14257.8	13294.8	13250.9
NM_000988.5	10998.7	12445.2	12131.6	7188.1	8641.69	8581.17
NM_000989.4	11961.8	13117.6	8976.46	9424.43	9916.59	9824.15
NM_000990.5	24980.7	27346.5	22122.6	15944.5	18419.9	19569.1
NM_000991.5	22611.4	24785.1	15347.9	16135.3	16710.2	17841.4
NM_000992.3	18184.6	20074.2	15236.2	14197.2	14192.8	14913
NM_000993.5	12218.1	13739.9	11744.9	8362.31	9241.35	9773.78
NM_000994.4	16574.5	17490.8	12657.1	11437.5	13022.9	13276
NM_000996.4	10365.6	11990.2	10040.3	7880.51	8615.19	9249.43
NM_000997.5	9882.96	12557.4	9902.79	7796.45	8886.07	8412.09
NM_000998.5	20782.4	23971.4	14856.5	15367.8	17283.4	16609.2
NM_000999.4	5870.41	7135	4490.58	4719.45	5059.39	4832.48
NM_001000.4	6941.35	8543.96	8325.21	4292.79	5268.44	5526.81
NM_001001.5	2338.34	2732.74	2064.26	1755.44	2204.34	2274.58
NM_001001330.3	1331.47	1269.67	1585.81	1819.62	1601.73	1640.51
NM_001001410.3	2287.09	2513.28	2325.23	1439.97	1732.26	1764.62
NM_001001415.4	235.97	241.508	235.109	96.7211	85.3863	99.8334
NM_001001433.3	1754.29	1820.83	2040.75	1745.5	1738.15	1631.51
NM_001001436.4	491.158	587.234	459.638	687.895	637.944	646.669
NM_001001520.3	2686.42	3149.62	2845.99	2180.29	2500.74	2732.38
NM_001001563.5	1729.73	1781.75	1670.45	1533.07	1648.84	1609.93
NM_001001660.3	380.114	361.76	323.275	260.333	207.086	256.329
NM_001001664.3	294.695	281.592	315.046	643.602	510.355	563.024
NM_001001701.4	1951.82	2277.79	1965.51	1555.67	1691.04	1519.09
NM_001001790.3	2898.9	2973.25	2103.05	2183.91	2244.58	2262.89
NM_001001852.4	1713.72	1692.56	1625.78	1825.95	1538.92	1646.8
NM_001001872.4	288.289	228.48	313.87	450.16	421.043	485.676
NM_001001973.3	2749.42	2812.91	2483.93	2540.06	2701.94	2542.6
NM_001001976.3	404.672	417.878	474.92	858.739	709.59	736.609
NM_001001995.3	5734.81	5916.44	6544.26	6023.83	5483.37	5194.03
NM_001001998.3	1315.45	1169.46	1202.58	1923.58	1876.54	1683.68
NM_001002.4	49066.7	51824.9	47667.2	40179	40482.9	40701.4
NM_001002002.3	775.176	818.721	801.721	573.095	679.165	712.325
NM_001002010.5	489.023	465.979	490.202	382.365	419.08	393.937
NM_001002030.2	1487.36	1508.17	1432.99	1586.41	1578.18	1505.6
NM_001002248.3	2076.75	2262.76	2179.46	1664.15	1747.97	1678.28
NM_001002257.3	288.289	275.579	311.519	215.137	192.365	219.454
NM_001002296.2	668.403	603.268	722.96	622.812	581.02	591.805
NM_001002755.4	575.51	623.31	506.66	416.714	457.357	433.511
NM_001002759.2	215.683	241.508	229.231	134.686	117.774	116.023
NM_001002800.3	3197.87	3474.3	3568.95	4553.12	4400.83	4264.95
NM_001002836.4	1238.57	1465.08	1028.6	1148.9	1293.55	1462.42
NM_001002847.4	1404.07	1617.4	1381.27	778.289	886.251	852.631
NM_001002860.4	705.773	617.298	641.847	1713.86	1382.87	1406.66
NM_001002909.4	1496.97	1387.92	1609.32	1964.25	1860.83	1859.96
NM_001002926.2	818.953	805.694	912.223	640.89	575.131	588.208
NM_001003.3	26731.8	29864.8	22100.2	18703.3	20374	21614.4
NM_001003681.3	1079.48	1108.33	1076.8	1313.42	1275.89	1285.24
NM_001003692.2	344.879	384.809	313.87	263.949	298.361	238.341
NM_001003694.2	649.183	615.293	704.151	931.958	965.749	1010.93
NM_001003699.4	719.654	679.428	664.183	568.576	663.462	825.649
NM_001003703.2	1475.61	1554.27	1320.14	1321.55	1283.74	1165.62
NM_001003722.2	795.463	778.637	693.571	686.991	598.686	612.491
NM_001003787.4	815.75	873.837	838.163	641.794	632.055	643.071
NM_001003795.3	675.877	587.234	490.202	604.733	621.259	694.337
NM_001003796.2	2554.02	2709.7	2356.97	2145.94	2123.86	2190.94
NM_001003800.2	1309.04	1160.44	1273.11	2725.37	2462.46	2297.97
NM_001003801.2	886.221	862.814	772.333	791.848	834.234	768.088
NM_001003891.3	1506.58	1507.17	1241.38	1759.06	1721.47	1658.49
NM_001003897.2	1502.3	1651.47	1476.48	1286.3	1350.48	1226.78
NM_001004.4	12905.7	14923.4	10685.7	10086.1	10971.7	10751.4
NM_001004019.2	306.44	278.586	275.077	201.578	270.881	302.198
NM_001004051.4	637.438	572.203	707.678	334.456	374.915	397.535
NM_001004067.4	133.467	26.0548	164.576	146.438	109.923	77.3484
NM_001004106.3	1120.05	1058.22	971	865.97	906.862	1004.63
NM_001004127.3	838.173	621.306	858.148	740.323	1051.14	1058.59
NM_001004304.4	569.103	547.15	631.267	602.021	722.349	819.353
NM_001004333.5	2219.82	2308.85	2080.71	1490.59	1690.06	1736.74
NM_001004356.3	2144.01	2086.39	1972.56	3370.78	2960.06	3453.7
NM_001005.5	26534.3	29708.4	27952.1	19541.3	21024.7	21647.7
NM_001005273.3	2519.86	2484.22	2856.57	3612.13	3608.8	4011.32
NM_001005361.3	2030.83	2161.54	2081.89	2662.99	2525.28	2567.79
NM_001005373.4	430.298	519.091	392.632	328.129	432.82	411.026
NM_001005464.3	14.9483	12.0253	4.70218	35.2535	12.7589	17.0886
NM_001005743.2	495.429	510.072	500.782	600.213	569.242	630.479
NM_001005751.3	675.877	680.43	713.556	681.567	851.901	770.786
NM_001006.5	33857.9	37289.4	28599.8	27382.9	25834.8	25557.3
NM_001006605.5	92.893	111.234	99.9213	169.94	127.589	107.928
NM_001006617.3	1876.01	1952.1	1914.96	2079.05	2062.03	2084.81
NM_001006634.3	972.707	869.828	976.878	1496.01	1362.26	1343.7
NM_001006681.2	203.938	233.491	172.805	99.4329	161.94	121.419
NM_001006935.3	1265.27	1341.82	1135.58	698.742	850.919	873.317
NM_001007.5	19822.5	20780.7	16829.1	16175	15655.1	15617.2
NM_001007025.2	1578.11	1522.2	1364.81	1369.46	1520.27	1493
NM_001007157.2	807.208	860.809	888.712	1315.23	1255.28	1165.62
NM_001007228.2	731.399	693.458	706.502	771.961	771.421	756.395
NM_001007237.3	1092.29	924.944	1133.23	1165.17	1254.3	1148.53
NM_001007253.4	430.298	315.664	456.111	649.026	538.817	505.463
NM_001007527.2	325.659	310.653	430.249	308.242	324.861	324.683
NM_001007553.3	12081.4	12104.4	12039.9	13837.4	13073.9	12697.7
NM_001007559.3	2592.46	2643.56	2627.34	2799.49	2738.25	2670.32
NM_001007561.3	1312.25	1456.06	1351.88	1379.41	1439.79	1366.19
NM_001007563.3	15146.9	16809.3	15383.2	14526.2	18285.4	18412.5
NM_001008.4	6064.74	6183	5758.99	4694.14	4611.84	4756.93
NM_001008212.2	764.499	751.58	712.38	728.572	706.646	634.077
NM_001008216.2	466.601	456.961	451.409	323.609	388.655	352.565
NM_001008272.2	1200.14	1272.68	1180.25	1209.47	1393.66	1365.29
NM_001008388.5	825.36	805.694	933.382	856.931	844.049	726.715
NM_001008390.2	2183.52	2136.49	2409.87	3000.16	2592.02	2673.92
NM_001008393.4	711.112	815.715	739.418	865.97	864.659	877.814
NM_001008395.4	1641.11	1883.96	1676.33	1073.88	1267.05	1207.89
NM_001008397.4	1369.91	1469.09	1430.64	1146.19	1109.04	1085.58
NM_001008661.3	728.196	804.691	819.355	599.309	756.7	699.733
NM_001008708.4	147.348	208.438	237.46	190.73	174.698	213.158
NM_001008710.3	661.996	662.392	635.97	856.027	885.27	883.211
NM_001008727.5	1354.96	1416.98	1166.14	2108.88	1769.56	1798.8
NM_001008895.4	2547.62	2419.08	2382.83	3095.08	2811.86	2834.91
NM_001008938.4	3000.34	3431.21	3412.61	4950.86	4767.89	4766.82
NM_001009.4	13509	13939.3	11989.4	11727.7	11552.7	11569.9
NM_001009184.2	3125.26	2937.17	3104.61	2634.97	2831.49	2876.28
NM_001009552.2	3196.8	3393.13	3568.95	3419.59	3069.98	3075.95
NM_001009566.3	6743.82	6772.24	6778.19	6640.31	6702.34	6632.17
NM_001009881.3	789.057	616.295	752.349	1438.16	1316.13	1275.35
NM_001009894.3	287.221	298.628	396.159	373.325	290.51	327.382
NM_001009899.4	408.943	459.967	530.171	724.052	703.701	647.568
NM_001009921.3	696.164	738.552	654.778	671.624	693.887	637.675
NM_001009923.2	2498.5	2635.54	2392.23	1928.09	1985.48	1980.48
NM_001009944.3	2376.78	2107.43	2030.17	3005.59	2908.04	3087.64
NM_001009984.3	765.567	756.59	834.637	590.27	694.868	647.568
NM_001009993.4	6549.49	6037.69	6337.36	7085.95	7168.53	7006.33
NM_001009996.3	635.303	489.028	530.171	423.946	485.819	503.664
NM_001009999.3	3165.84	3070.45	3253.91	3794.72	3613.71	3634.48
NM_001010.3	33021.9	35650.9	26940	24028.4	23891.5	23946.5
NM_001010851.3	618.219	722.519	608.932	188.923	211.994	217.655
NM_001010853.3	777.312	817.719	907.52	1169.69	1008.93	942.571
NM_001010854.2	609.677	552.161	625.39	840.66	899.992	782.478
NM_001010858.3	2783.59	2789.86	2915.35	1966.96	2063.99	2288.97
NM_001010883.3	458.059	463.975	477.271	559.536	556.483	514.457
NM_001010924.2	2215.55	1966.13	2197.09	2644.92	2388.85	2338.44
NM_001010942.3	3524.6	3700.78	3571.3	3430.44	3279.03	3027.38
NM_001010982.5	338.472	338.712	284.482	227.792	224.753	230.246
NM_001011.4	17539.7	18934.8	14801.3	12967	13958.2	13815.7
NM_001011551.3	284.018	269.567	259.795	236.831	295.417	251.832
NM_001011658.4	373.708	395.832	360.892	201.578	211.012	213.158
NM_001011663.2	499.7	527.108	540.751	498.972	441.653	501.865
NM_001011713.3	621.422	592.245	747.646	752.074	640.888	600.799
NM_001012.2	26121.1	28401.7	22373	20451.5	20834.3	20683.5
NM_001012339.3	1189.46	1170.46	1186.12	1315.23	1384.83	1371.58
NM_001012426.2	3229.9	3122.56	2865.98	3076.09	3332.03	3540.94
NM_001012507.4	661.996	702.477	566.613	528.802	516.244	608.894
NM_001012614.2	3666.6	3861.12	3390.27	3563.31	3823.74	3922.28
NM_001012750.3	769.838	795.672	878.132	841.564	787.125	764.49
NM_001012754.4	497.565	431.908	524.293	273.893	218.864	275.216
NM_001012759.3	505.039	520.093	485.5	383.269	468.153	469.487
NM_001012967.3	93.9608	136.286	111.677	80.4503	118.756	127.715
NM_001012968.3	909.711	994.09	1096.78	623.716	830.309	787.874
NM_001012981.5	601.135	599.26	586.597	370.614	379.822	342.671
NM_001012991.3	1570.64	1610.38	1288.4	1162.46	1351.46	1409.36
NM_001012994.2	703.638	596.253	653.603	1206.75	1167.93	1155.73
NM_001013.4	17991.3	20849.8	20835.4	14572.3	14824.8	15325.8
NM_001013251.3	4126.8	4203.84	4361.27	2550.91	2863.88	2834.91
NM_001013437.2	776.244	692.456	715.907	967.211	910.788	886.808
NM_001013620.4	205.005	230.484	343.259	149.149	168.81	169.087
NM_001013627.3	594.729	582.224	578.368	853.315	855.826	920.086
NM_001013663.2	720.722	803.689	499.606	511.628	527.04	640.373
NM_001013694.3	721.789	675.42	621.863	605.637	659.536	716.822
NM_001013703.4	1326.13	1155.43	1401.25	1644.26	1534.99	1573.95
NM_001013836.2	696.164	645.357	588.948	481.798	534.891	607.095
NM_001013839.4	3442.38	3446.24	3333.84	3470.21	3290.81	3441.1
NM_001014.5	23348.2	25530.7	19008.6	17869	17786.9	17915.1
NM_001014286.3	848.85	845.778	907.52	912.071	830.309	837.341
NM_001014436.3	3185.06	3147.62	3159.86	2605.14	2595.94	2754.86
NM_001014437.3	1476.68	1358.86	1502.35	1303.48	1495.73	1510.99
NM_001014446.3	208.208	304.64	238.636	142.822	240.456	225.749
NM_001014809.3	7923.67	7604.99	7963.14	8099.26	7855.54	7739.34
NM_001014840.2	3019.56	2997.3	2412.22	2781.41	2830.51	2816.02
NM_001015.5	17950.8	20175.4	18038.7	13061.9	14525.5	15181
NM_001015048.3	1896.3	1847.88	2000.78	2144.14	2193.55	2218.82
NM_001015877.2	1609.08	1658.49	1839.73	1926.29	1763.67	1621.62
NM_001016.4	15979.7	18067	16628.1	10393.5	11260.2	11804.6
NM_001017.3	9823.17	10810.7	7414.16	8175.19	8691.74	8296.96
NM_001017392.5	2730.2	2369.98	2824.83	3128.52	3254.5	3049.87
NM_001017405.3	2225.16	2136.49	2178.28	1829.57	1981.55	2059.63
NM_001017420.3	278.679	202.425	302.115	354.343	352.341	309.394
NM_001017928.4	322.456	427.899	309.168	324.513	288.547	314.79
NM_001017962.3	307.508	299.63	372.648	382.365	412.21	360.659
NM_001017969.3	452.72	404.851	552.506	734.9	701.738	646.669
NM_001017979.3	380.114	384.809	391.456	471.854	410.247	419.12
NM_001017980.4	2182.45	2453.16	2299.37	1933.52	1769.56	1856.36
NM_001017995.3	3298.24	3071.46	3460.8	3829.07	4260.48	4397.17
NM_001017998.4	1584.52	1788.76	1474.13	1598.16	1392.68	1453.43
NM_001018.5	28367.6	30748.6	17231.1	23920.8	23426.3	23285.5
NM_001018005.2	2527.33	2117.45	2138.32	2521.08	2209.25	1954.4
NM_001018050.4	1423.29	1635.44	1425.94	1233.87	1294.54	1507.39
NM_001018055.3	509.31	520.093	537.224	471.854	488.763	484.777
NM_001018057.2	2319.12	2175.57	2247.64	2367.41	2400.63	2524.62
NM_001018069.2	11061.7	11099.3	12802.9	11568.6	11789.2	11702.1
NM_001018072.2	1901.64	1670.51	1979.62	1953.4	2286.78	2150.47
NM_001018108.4	7391.93	8203.24	7006.25	4733.91	5656.11	6055.66
NM_001018109.3	439.907	555.167	405.563	409.483	423.987	500.066
NM_001018111.3	14771.1	13673.7	14441.6	12579.2	12974.8	12914.5
NM_001018113.3	134.535	93.1959	97.5702	180.787	164.884	122.318
NM_001018115.3	1065.6	1095.3	1221.39	1034.1	1011.88	1012.72
NM_001019.5	11397	12297.8	8657.89	9714.6	9358.15	9764.78
NM_001020.6	19240.6	21508.2	13723.3	15118.3	15662	15584.8
NM_001020658.2	1632.57	1644.46	1589.34	2749.77	2576.31	2208.03
NM_001021.6	14140	15505.6	13010.9	10153	11097.3	11218.2
NM_001022.4	33663.6	36723.2	24186.8	25280.4	25379.4	26329.9
NM_001023.4	16971.7	18493.9	15004.7	12962.4	13468.5	13542.3
NM_001023561.4	170.838	189.398	134.012	423.946	375.896	315.689
NM_001023563.4	214.615	221.466	264.498	344.399	294.436	277.915
NM_001023570.4	770.905	636.338	673.587	733.996	649.721	658.361
NM_001024.4	8009.09	9510.99	6069.34	6421.56	7395.24	7172.71
NM_001024211.2	387.588	357.752	263.322	276.604	324.861	331.879
NM_001024401.3	1950.75	2205.64	2173.58	3267.73	3436.06	3762.19
NM_001024599.5	1.06774	18.0379	5.87772	3.61574	0	7.1952
NM_001024630.4	1222.56	1215.56	1149.68	977.154	1407.4	1406.66
NM_001024674.3	509.31	558.173	406.738	649.93	643.833	581.012
NM_001024736.2	7097.24	7285.31	7019.18	5974.11	6219.46	6363.25
NM_001024807.3	4104.38	3973.35	3728.83	3774.84	3829.63	4128.25
NM_001024808.3	987.656	959.016	943.962	963.595	1053.1	1055
NM_001024924.2	628.896	732.54	717.082	604.733	580.038	529.747
NM_001025.5	16327.8	18802.5	16057.9	12897.4	14321.4	13768
NM_001025091.2	2358.63	2311.86	2255.87	2710.9	2711.75	2735.08
NM_001025248.2	1598.4	1908.01	1845.61	1466.18	1271.96	1306.83
NM_001025300.3	734.602	760.599	752.349	816.254	691.924	664.657
NM_001025356.3	1127.53	1036.18	1211.99	1400.2	1408.38	1369.79
NM_001025595.3	449.517	495.041	531.346	499.876	513.299	455.996
NM_001025603.2	969.504	962.022	1013.32	1142.57	1208.17	1304.13
NM_001025780.3	578.713	642.35	690.045	670.72	643.833	688.041
NM_001028.3	9585.06	10933	9516.03	6082.58	7564.05	8037.04
NM_001029.5	14599.2	16119.9	10340.1	12821.4	11902.1	11408
NM_001029858.4	2680.02	2794.87	2961.2	3146.6	3470.41	3412.32
NM_001029896.2	552.019	585.23	548.979	482.702	488.763	500.066
NM_001030.6	13434.3	14540.6	7575.21	11028.9	12056.2	11871.2
NM_001030006.2	7236.05	7510.79	7388.3	7480.07	7041.92	7112.45
NM_001030055.2	955.624	817.719	1097.96	1700.3	1315.15	1218.69
NM_001031.5	12475.4	13616.6	7531.71	10458.5	10498.6	10010.3
NM_001031623.3	490.091	517.087	560.735	486.317	495.633	482.078
NM_001031684.3	4737.54	4574.62	4827.96	2816.66	2881.54	2968.02
NM_001031685.3	1310.11	1220.57	1340.12	1776.23	1677.3	1737.64
NM_001031689.3	938.54	953.003	1049.76	933.766	1004.03	936.275
NM_001031692.3	654.522	668.405	690.045	1150.71	1124.74	1151.23
NM_001031701.3	345.946	324.682	358.541	244.967	186.476	201.466
NM_001031702.4	5203.08	4727.94	5534.46	5554.68	5843.57	5969.32
NM_001031703.3	653.454	646.359	654.778	491.741	515.262	557.628
NM_001031710.3	1510.85	1636.44	1758.61	1813.29	1891.26	1868.95
NM_001031711.3	6012.42	5976.56	6016.44	5295.26	5767.99	5950.43
NM_001031712.3	400.401	369.777	467.867	366.998	319.953	363.358
NM_001031713.4	2250.79	2283.8	2014.88	2123.34	2106.2	2035.34
NM_001031722.4	437.772	370.779	309.168	443.832	448.524	430.813
NM_001031723.4	587.255	552.161	698.274	658.065	582.001	610.693
NM_001031725.6	319.253	325.685	312.695	241.351	237.511	252.731
NM_001031732.4	1203.34	1370.88	1323.66	1799.74	1597.8	1590.14
NM_001031827.3	794.395	952.001	347.961	735.804	827.364	682.645
NM_001032.5	2445.11	3294.93	2636.75	1911.82	2164.1	2153.16
NM_001032221.6	857.392	815.715	831.11	1224.83	816.568	919.187
NM_001032283.3	5857.6	6355.36	6525.45	7371.6	7054.68	7328.31
NM_001032288.3	5710.25	6034.68	5436.89	5752.65	5074.11	5265.09
NM_001032296.4	2592.46	2669.61	2639.1	3245.13	3047.41	3039.97
NM_001032363.4	2319.12	2337.91	1986.67	1571.04	1786.24	1882.44
NM_001032373.2	293.627	300.632	283.306	147.342	211.994	158.294
NM_001032382.2	531.732	640.346	579.544	583.038	702.72	643.97
NM_001032386.2	398.265	474.998	389.105	261.237	300.324	325.583
NM_001032396.4	1188.39	1164.45	1284.87	1241.1	1286.68	1384.18
NM_001032999.3	611.813	486.022	476.096	668.912	611.445	686.242
NM_001033.5	2528.4	2527.31	2726.09	3159.26	3146.54	3171.28
NM_001033002.4	286.153	345.727	384.403	312.762	383.748	328.281
NM_001033025.3	959.894	970.039	1155.56	840.66	862.696	824.75
NM_001033026.2	2840.18	3034.38	3030.55	2625.93	2728.44	3101.13
NM_001033031.2	86.4866	94.198	90.5169	49.7165	59.8686	54.8634
NM_001033044.4	4009.35	4214.86	3949.83	4822.5	4191.78	4434.04
NM_001033057.2	2420.56	2222.67	2348.74	2712.71	2838.36	2871.78
NM_001033088.3	4835.78	4827.15	4174.36	3848.05	3778.59	3558.93
NM_001033561.2	1397.67	1403.95	1300.15	1433.64	1644.91	1582.94
NM_001033564.3	510.378	505.062	460.814	349.823	402.395	340.873
NM_001033566.3	518.92	561.18	577.192	865.97	824.42	718.621
NM_001033910.3	475.142	407.857	387.93	243.159	290.51	310.293
NM_001033930.3	11718.4	12648.6	9923.95	8031.47	8810.5	9612.79
NM_001034.4	5730.54	5731.05	5715.5	6418.85	6081.08	5885.67
NM_001034077.4	23.4902	38.08	21.1598	12.6551	17.6661	21.5856
NM_001034116.2	553.087	517.087	567.788	598.405	605.556	632.278
NM_001034852.3	2138.67	2117.45	1872.64	2644.92	2361.37	2650.53
NM_001034954.3	403.604	370.779	391.456	495.357	490.726	502.765
NM_001034996.3	9279.69	9618.22	9052.87	7260.41	7993.93	8048.73
NM_001035005.4	1405.14	1596.36	1484.71	1109.13	1032.49	1041.51
NM_001035006.5	20238.9	22693.7	19970.2	16741.8	15435.3	14897.7
NM_001035235.4	889.424	995.092	916.925	569.479	676.221	654.763
NM_001035267.2	24742.6	29912.9	28589.2	14795.6	19776.3	19756.2
NM_001037131.3	1395.53	1573.31	1431.81	2522.88	2479.15	2457.16
NM_001037132.4	3631.37	3980.37	4116.76	3590.43	3914.03	3716.32
NM_001037165.2	2369.31	2385.01	2046.62	2004.93	2245.56	2287.17
NM_001037171.2	804.005	867.824	746.471	664.393	682.109	680.846
NM_001037172.3	565.9	563.184	603.054	628.235	600.649	519.853
NM_001037283.2	4468.47	4340.12	4652.81	5011.42	5081.96	5066.32
NM_001037317.2	242.376	246.518	218.651	242.255	249.289	231.146
NM_001037333.3	2604.21	2368.98	2533.3	2876.32	2751.99	2601.06
NM_001037442.4	1895.23	1910.01	1775.07	1571.94	1648.84	1642.3
NM_001037582.3	1394.46	1405.96	1451.8	1413.76	1331.83	1390.47
NM_001037637.2	7175.18	7362.48	6350.29	6110.61	5995.69	6167.19
NM_001037806.4	918.253	874.839	881.659	1066.64	1040.34	1219.59
NM_001037954.4	955.624	969.037	1035.65	518.859	636.962	572.918
NM_001037984.3	1242.84	1157.43	1421.23	1164.27	1103.15	1171.02
NM_001039111.3	1330.4	1377.9	1497.64	734.9	927.472	858.927
NM_001039141.3	2274.28	2293.82	2182.99	2354.75	2563.55	2297.97
NM_001039182.4	96.0962	191.402	222.178	3.61574	34.3508	115.123
NM_001039469.3	752.754	661.39	822.881	1166.98	1231.72	1243.87
NM_001039479.2	1515.12	1397.94	1643.41	1513.19	1567.38	1585.64
NM_001039547.3	477.278	422.889	458.462	347.111	313.083	324.683
NM_001039570.3	2914.92	2769.82	3192.78	3327.39	3100.41	3161.39
NM_001039580.2	487.955	435.916	505.484	452.872	365.1	402.931
NM_001039591.3	4376.65	4242.92	4592.85	6346.53	5979.01	5560.99
NM_001039613.3	980.181	1106.33	1043.88	775.577	781.236	862.525
NM_001039672.3	790.124	902.898	954.542	636.371	695.85	663.757
NM_001039697.2	853.121	882.856	871.079	1038.62	1083.52	1020.82
NM_001039705.3	1127.53	1096.3	1186.12	1256.47	1228.78	1249.27
NM_001039707.2	1270.61	1217.56	1229.62	933.766	1003.04	967.754
NM_001039844.3	635.303	752.582	476.096	690.607	575.131	590.906
NM_001039886.4	146.28	127.268	88.1659	125.647	88.3307	87.2418
NM_001039960.3	1086.96	1007.12	1201.41	1378.5	1443.72	1348.2
NM_001040025.3	1247.12	1209.54	1120.29	867.778	908.825	1001.93
NM_001040058.2	6527.07	6681.04	7153.19	4782.72	4371.39	4060.79
NM_001040092.3	2188.86	2001.21	2371.07	2993.83	2538.04	2559.69
NM_001040108.2	278.679	278.586	269.2	187.115	190.402	187.975
NM_001040118.3	635.303	598.258	692.396	461.007	478.949	519.853
NM_001040157.3	306.44	272.573	358.541	293.779	239.474	261.725
NM_001040167.2	2289.23	2039.29	2348.74	1888.32	2319.17	2528.21
NM_001040181.2	1772.44	1999.2	1856.19	2550	2169.99	2033.54
NM_001040185.3	235.97	171.36	166.927	161.804	107.96	126.815
NM_001040202.2	1234.3	1328.79	1601.09	1957.02	1376	1395.87
NM_001040260.4	2204.87	2275.78	2368.72	3293.04	3332.03	3379.94
NM_001040272.6	310.711	288.607	298.588	500.78	352.341	354.364
NM_001040402.3	1340.01	1325.79	1403.6	1397.48	1266.07	1314.92
NM_001040429.3	563.765	574.207	659.481	2125.15	1219.95	1256.46
NM_001040431.3	1464.93	1608.38	1267.24	974.443	1120.82	1062.19
NM_001040436.3	449.517	459.967	463.165	476.374	446.561	461.392
NM_001040440.3	428.162	384.809	431.425	279.316	282.658	321.086
NM_001040441.3	559.494	531.116	458.462	474.566	481.893	511.759
NM_001040446.3	1184.12	1073.26	1143.8	922.014	953.972	911.092
NM_001040450.3	1188.39	1197.52	1555.25	1065.74	990.285	1038.81
NM_001040455.2	532.8	544.144	617.161	665.297	638.925	523.451
NM_001040456.3	2250.79	2281.8	2248.82	1857.59	1973.7	1940.91
NM_001040458.3	721.789	696.464	818.179	663.489	648.74	721.319
NM_001040616.3	147.348	185.39	178.683	170.844	127.589	150.2
NM_001040694.2	644.912	843.774	827.583	1267.32	1564.43	1541.57
NM_001040697.4	330.998	363.765	420.845	270.277	304.25	274.317
NM_001040716.2	395.062	362.763	411.441	442.928	498.578	508.161
NM_001040874.1	0	0	198.667	135.59	1.9629	161.892
NM_001042371.3	1640.04	1670.51	1586.99	1595.45	1678.28	1974.18
NM_001042388.3	4361.7	4450.35	4632.82	6474.89	6598.3	6087.14
NM_001042413.2	555.223	515.083	700.625	1195.91	1071.75	1009.13
NM_001042424.3	5265.01	4844.18	5078.35	6734.32	6668.97	6539.54
NM_001042432.2	495.429	456.961	473.745	481.798	476.986	580.113
NM_001042454.3	2437.64	2239.71	2034.87	1188.68	1339.68	1443.54
NM_001042462.2	1356.02	1567.29	1264.89	967.211	1089.41	1217.79
NM_001042472.3	1188.39	1171.46	1248.43	1188.68	1168.91	1119.75
NM_001042475.3	240.241	236.497	236.284	349.823	312.102	322.885
NM_001042479.2	369.437	361.76	324.45	197.962	220.827	189.773
NM_001042492.3	1768.17	1659.49	1884.4	3312.92	2724.51	2473.35
NM_001042517.2	277.611	350.737	358.541	528.802	459.32	446.102
NM_001042545.2	2671.47	2492.24	2496.86	2560.85	2456.57	2841.2
NM_001042552.3	361.962	491.032	431.425	191.634	202.179	205.063
NM_001042603.3	875.543	799.681	953.367	1143.48	1109.04	1126.95
NM_001042618.2	669.47	624.312	627.741	823.485	749.829	712.325
NM_001042635.2	519.987	562.182	444.356	479.99	491.708	494.67
NM_001042646.3	2377.85	2238.71	2272.33	3252.36	3294.74	3333.18
NM_001042681.2	3451.99	3509.38	3309.16	5911.74	5751.31	6073.65
NM_001042683.3	160.16	124.261	165.752	201.578	202.179	220.353
NM_001042697.2	435.636	415.874	396.159	299.203	342.527	284.21
NM_001042724.2	3302.51	3470.29	3450.22	3565.12	3680.45	3896.2
NM_001042750.2	1647.52	1659.49	1891.45	2506.61	2390.82	2279.98
NM_001044305.3	675.877	675.42	675.938	812.638	717.442	688.041
NM_001044385.3	1179.85	1334.81	1282.52	1260.09	1007.95	1063.99
NM_001046.3	625.693	543.142	767.631	970.827	845.03	904.796
NM_001047.4	2174.98	2207.64	2159.48	1433.64	1589.95	1719.65
NM_001047160.3	925.727	893.879	934.558	1395.68	1198.35	1207.89
NM_001048166.1	512.513	515.083	546.628	446.544	572.187	504.563
NM_001048183.3	1760.7	1554.27	1534.09	1824.14	1911.87	2029.95
NM_001048201.3	4373.45	4627.73	4864.4	5069.27	5186.97	5440.47
NM_001048205.2	1067.74	1058.22	1086.2	999.753	1062.91	1159.33
NM_001048241.3	1730.8	2182.59	1942	1296.24	1565.42	1514.59
NM_001048249.4	1419.02	1537.23	1504.7	1246.53	1126.71	1192.6
NM_001064.4	7768.85	8346.54	7711.57	8459.03	9136.34	9239.54
NM_001065.4	2779.32	2701.68	2616.76	1746.4	2097.36	1976.88
NM_001067.4	3349.49	4100.62	4254.3	6765.05	6476.6	6545.83
NM_001069.3	14951.5	15806.2	14863.6	10311.2	11612.5	11957.5
NM_001070.5	1556.76	1481.11	1703.36	1469.8	1477.09	1534.38
NM_001071.4	6497.17	6638.95	6691.2	5851.18	6338.22	6212.16
NM_001071775.3	1146.75	1226.58	1410.65	1364.04	1146.34	1269.95
NM_001076678.3	142.009	130.274	157.523	133.782	142.311	128.614
NM_001076786.3	1841.84	1637.44	1954.93	2158.6	2048.29	1936.41
NM_001077195.2	2675.75	2601.47	2716.68	1108.23	1682.21	1517.29
NM_001077198.3	1092.29	1211.55	1247.25	1036.81	1090.39	1046
NM_001077199.3	1551.42	1607.38	1759.79	2004.93	1936.41	1897.73
NM_001077207.4	2336.21	2303.84	2392.23	2993.83	2669.55	2823.22
NM_001077350.3	840.308	940.978	801.721	713.205	816.568	902.098
NM_001077351.2	1236.44	1152.42	1202.58	1100.09	1235.65	1269.05
NM_001077365.2	569.103	570.199	557.208	481.798	453.431	567.521
NM_001077415.3	538.139	586.232	627.741	450.16	498.578	491.072
NM_001077446.4	1650.72	1756.69	1623.43	1664.15	1603.69	1636.91
NM_001077498.3	790.124	734.544	727.662	713.205	829.327	785.176
NM_001077525.3	801.87	700.472	705.327	563.152	617.333	655.663
NM_001077619.2	1250.32	1212.55	1209.64	1345.06	1263.13	1157.53
NM_001077628.3	3040.91	3381.11	3270.37	2400.85	2430.08	2515.62
NM_001077663.3	663.064	629.323	540.751	317.281	324.861	348.068
NM_001077700.3	639.574	590.241	789.966	607.445	565.316	488.374
NM_001078.4	41.6417	74.1559	77.5859	60.5637	61.8315	46.7688
NM_001078170.3	371.572	281.592	283.306	308.242	249.289	192.472
NM_001078171.2	5626.97	5663.91	4973.73	4060.48	3804.11	4228.08
NM_001078172.2	1723.33	1946.09	1626.95	1251.05	1237.61	1335.61
NM_001078173.2	607.542	595.251	684.167	508.012	612.426	576.515
NM_001078645.3	1772.44	1573.31	1751.56	1232.06	1270	1224.98
NM_001079514.3	1279.15	1123.36	1327.19	2071.82	2008.05	2099.2
NM_001079521.2	1929.4	1893.98	1965.51	4190.65	3651	3379.05
NM_001079524.2	11406.6	12400.1	10649.3	10732.4	10220.8	9815.15
NM_001079537.2	156.957	117.246	128.134	119.32	158.995	108.827
NM_001079559.3	4595.53	4948.4	5249.98	4106.58	4656.99	4940.4
NM_001079673.2	1602.67	1751.68	2026.64	2391.81	2161.16	2135.18
NM_001079675.5	1681.68	2023.25	1977.27	526.994	1253.31	1170.12
NM_001079802.2	839.24	767.613	923.978	584.846	635	555.829
NM_001079855.2	2045.78	2025.26	2027.81	1703.92	1806.85	1870.75
NM_001079862.4	2643.71	3013.33	2542.7	2107.07	2580.24	2637.94
NM_001079866.2	495.429	510.072	546.628	416.714	361.174	342.671
NM_001079872.2	1407.28	1323.78	1430.64	1624.37	1341.65	1323.02
NM_001079910.2	82.2157	67.1411	97.5702	110.28	101.09	70.1532
NM_001080.3	697.231	704.481	607.757	387.788	347.434	395.736
NM_001080392.2	809.344	830.746	888.712	1702.11	1561.49	1559.56
NM_001080394.4	752.754	809.702	836.988	693.319	672.295	651.166
NM_001080414.4	407.875	391.824	380.876	494.453	617.333	593.604
NM_001080415.2	3101.77	3019.35	2902.42	2982.08	2924.73	2754.86
NM_001080417.3	1595.2	1569.3	1559.95	1276.36	1287.67	1412.06
NM_001080421.3	924.659	979.058	993.335	597.501	777.31	652.065
NM_001080425.4	1971.04	2186.6	1989.02	1328.79	1397.59	1568.55
NM_001080430.4	1478.81	1533.22	1624.6	2598.82	2104.23	2183.74
NM_001080432.3	1534.34	1389.92	1504.7	1464.38	1346.55	1403.06
NM_001080449.3	444.178	391.824	507.835	619.196	582.001	563.924
NM_001080453.3	2430.17	2251.73	2448.66	2619.61	2580.24	2735.08
NM_001080457.2	2749.42	3032.37	2849.52	3815.51	4289.93	4913.42
NM_001080466.2	1461.73	1701.58	1691.61	629.139	943.176	1125.15
NM_001080475.3	248.782	199.419	266.849	338.072	350.378	334.577
NM_001080477.4	8600.61	7742.27	8693.15	11654.4	10941.2	10835.1
NM_001080480.3	456.991	460.969	490.202	301.011	378.841	369.653
NM_001080495.3	3112.45	3142.61	2882.44	3175.53	3607.82	3988.84
NM_001080496.3	1255.66	1240.61	1221.39	1496.01	1516.34	1570.35
NM_001080497.3	1536.47	1506.17	1556.42	2060.97	1954.07	1995.77
NM_001080517.3	2705.64	2478.21	2433.38	4199.69	4234.97	3844.04
NM_001080533.3	2687.49	2723.73	2989.41	2038.37	2280.89	2364.52
NM_001080543.2	877.679	839.765	911.047	745.747	823.438	706.928
NM_001080779.2	1042.11	996.094	1194.35	1591.83	1347.53	1451.63
NM_001080792.4	178.312	109.23	153.996	165.42	203.161	177.182
NM_001080826.3	2123.73	2310.86	2146.54	2696.44	3159.29	3084.94
NM_001081550.2	564.832	623.31	646.55	1081.11	1036.41	910.193
NM_001082486.2	577.645	568.194	505.484	542.361	528.021	501.865
NM_001082538.3	427.094	281.592	369.121	381.461	347.434	316.589
NM_001082968.2	1005.81	1065.24	1014.5	1725.61	1965.85	1832.98
NM_001083538.3	6.40641	4.00843	2.35109	17.1748	14.7218	9.8934
NM_001083601.3	1218.29	1349.84	1254.31	1101.9	1289.63	1234.88
NM_001083603.3	1316.52	1797.78	1522.33	294.683	244.382	151.999
NM_001083614.2	996.198	779.639	946.313	710.493	724.312	717.721
NM_001083893.2	767.702	673.415	766.455	1339.63	1165.97	1209.69
NM_001083926.2	387.588	437.92	406.738	431.177	384.729	379.547
NM_001083961.2	623.558	588.236	593.65	643.602	760.625	833.744
NM_001083962.2	824.292	828.742	956.893	1686.74	1558.55	1391.37
NM_001083965.2	352.353	335.706	377.35	280.22	318.972	304.897
NM_001084.5	1240.71	1176.47	1400.07	1120.88	1236.63	1162.92
NM_001084392.3	1491.63	1686.55	1401.25	1088.34	1153.21	1199.8
NM_001084393.2	87.5543	99.2085	82.2881	21.6945	34.3508	31.479
NM_001085365.2	1177.71	1382.91	1149.68	893.088	822.457	973.151
NM_001085377.2	1856.79	1634.44	1869.12	2323.11	2696.05	2480.54
NM_001085400.2	326.727	347.731	331.504	155.477	182.55	166.389
NM_001085411.3	978.046	891.875	995.686	455.584	568.261	537.841
NM_001085457.2	106.774	176.371	109.326	37.9653	122.682	107.928
NM_001085458.2	4865.67	4805.1	5150.06	4502.5	4688.4	4565.35
NM_001085487.3	952.42	737.55	952.191	1157.94	1002.06	1073.88
NM_001087.5	1633.64	1935.07	1878.52	1292.63	1502.6	1453.43
NM_001089.3	1080.55	1006.11	1034.48	1157.04	1186.58	1054.1
NM_001093725.2	2936.27	2566.39	2958.85	6170.26	6081.08	6071.85
NM_001093771.3	5024.76	5163.85	5426.31	4683.29	4968.11	5200.33
NM_001096.3	4796.27	5336.22	5400.45	7746.73	8095.02	7946.2
NM_001097612.2	430.298	336.708	386.754	490.837	468.153	359.76
NM_001098.3	2062.87	1926.05	2202.97	1943.46	2195.51	2122.58
NM_001098204.2	3796.87	3851.09	4267.23	3338.23	3645.11	3599.4
NM_001098272.3	22095.7	22242.8	24115.1	33205.2	28417	29520.1
NM_001098402.2	690.825	645.357	798.195	872.298	733.145	638.574
NM_001098484.3	178.312	158.333	222.178	169.94	226.715	186.176
NM_001098507.2	3801.14	3954.31	3880.47	5644.17	4855.24	4627.41
NM_001098511.3	1925.13	1971.14	2067.78	2499.38	2323.1	2190.04
NM_001098536.2	2277.48	2382.01	2619.11	2211.03	2161.16	2286.27
NM_001098616.3	3019.56	3131.58	3088.16	2879.04	2902.15	2893.37
NM_001098638.2	542.41	550.156	560.735	1218.51	1033.47	978.547
NM_001098811.2	314.982	250.527	296.237	386.884	324.861	308.494
NM_001098816.3	539.207	440.927	567.788	1121.78	694.868	808.561
NM_001099269.3	453.788	447.942	342.084	145.534	203.161	165.49
NM_001099271.2	184.718	172.362	195.14	75.9306	113.848	106.129
NM_001099272.2	411.078	456.961	432.6	524.283	553.539	499.167
NM_001099274.3	566.968	631.327	660.656	555.016	582.001	585.509
NM_001099286.3	145.212	182.383	189.263	111.184	119.737	124.117
NM_001099334.3	298.966	296.623	257.444	157.285	189.42	181.679
NM_001099402.2	1376.31	1284.7	1291.92	1560.19	1480.03	1582.04
NM_001099415.3	2483.55	2249.73	2335.81	3791.11	3444.9	3561.62
NM_001099625.2	988.723	1022.15	989.809	757.498	892.14	802.265
NM_001099645.2	1216.15	1421.99	1043.88	1044.05	1128.67	1125.15
NM_001099652.2	209.276	170.358	197.492	649.026	390.618	464.99
NM_001099658.2	3319.59	3336.01	3739.41	3297.56	2935.52	2853.8
NM_001099666.2	1735.07	1647.46	1943.18	3687.15	2902.15	2701.8
NM_001099673.3	550.952	586.232	349.137	517.955	544.706	473.984
NM_001099678.2	1113.65	1081.27	1150.86	1364.94	1085.49	1179.11
NM_001099695.2	5521.26	5701.99	5041.91	4808.03	5255.68	5677.01
NM_001099771.2	33.0998	6.01264	16.4576	59.6598	74.5904	69.2538
NM_001099922.3	365.166	333.701	377.35	357.959	328.786	283.311
NM_001100164.2	1082.68	1011.13	1220.22	894.896	1234.67	1251.96
NM_001100389.2	478.346	446.939	346.786	310.05	308.176	321.985
NM_001100399.2	2196.33	2205.64	2234.71	3810.09	3343.81	3253.13
NM_001100420.2	475.142	374.788	558.384	543.265	389.637	451.499
NM_001100423.2	2859.4	2763.81	2593.25	3302.98	3277.07	3099.33
NM_001100427.2	1401.94	1259.65	1221.39	1351.38	1190.5	1211.49
NM_001100588.3	1557.83	1338.81	1568.18	2180.29	2066.94	2066.82
NM_001100623.2	3500.04	3517.39	3878.12	3694.39	3538.14	3436.61
NM_001100624.3	1094.43	1100.31	934.558	1862.11	1436.85	1578.45
NM_001100913.3	2677.88	2546.35	2358.14	2434.3	2468.35	2399.6
NM_001101.5	193252	202975	171707	159246	155205	155564
NM_001101662.2	1994.53	1859.91	2064.26	2535.54	2500.74	2389.71
NM_001101669.3	185.786	186.392	229.231	187.115	257.14	281.512
NM_001102368.3	333.134	302.636	365.594	274.796	324.861	277.915
NM_001102371.2	1454.26	1390.92	1128.52	991.617	946.12	948.867
NM_001102401.4	293.627	259.546	320.924	263.949	281.677	269.82
NM_001102420.3	4524	4569.61	4367.15	7742.21	6016.3	6332.67
NM_001102559.2	341.675	294.619	365.594	245.87	243.4	303.997
NM_001102564.3	297.898	303.638	276.253	270.277	207.086	226.649
NM_001102575.2	965.233	955.007	1107.36	1746.4	1521.25	1466.02
NM_001103146.3	679.08	651.369	624.214	856.931	962.805	974.05
NM_001104631.2	990.859	1021.15	1063.87	2717.23	2348.62	2333.04
NM_001104647.3	1212.95	1294.72	1450.62	987.098	977.526	926.382
NM_001105079.3	1829.03	1659.49	1677.5	1882.9	2051.24	2177.45
NM_001105192.3	917.185	1085.28	1009.79	2098.94	2234.77	2325.85
NM_001105203.2	1508.71	1433.01	1383.62	1379.41	1254.3	1405.76
NM_001105206.3	155.889	144.303	151.645	190.73	228.678	214.957
NM_001105244.2	305.372	280.59	268.024	329.937	325.842	296.802
NM_001105539.3	1013.28	1020.14	1081.5	912.975	923.547	900.299
NM_001105562.3	1768.17	1813.81	1872.64	2197.47	2222.99	2183.74
NM_001105564.2	482.617	533.121	486.675	380.557	436.746	465.889
NM_001105573.2	965.233	883.858	940.436	887.665	776.329	818.454
NM_001106.4	2009.48	2004.21	2351.09	1904.59	2053.2	2153.16
NM_001107.5	148.415	193.407	189.263	70.507	144.273	127.715
NM_001109689.4	233.834	210.442	181.034	271.181	260.085	279.713
NM_001110.4	1913.38	1914.02	2052.5	2635.88	2529.2	2479.65
NM_001110303.4	473.007	448.944	406.738	464.623	440.672	488.374
NM_001110556.2	19487.2	19885.8	19467	29071.5	28071.5	29047
NM_001110792.2	190.057	462.973	356.19	612.868	1188.54	1504.7
NM_001111.5	4672.41	4047.51	4695.13	4975.26	5098.64	4909.82
NM_001111020.3	2100.24	2197.62	2254.69	2047.41	2254.4	2448.17
NM_001111067.4	345.946	391.824	396.159	282.932	266.955	250.933
NM_001111077.2	3216.02	3276.89	3168.09	3052.59	2749.05	2843.9
NM_001112732.3	1169.17	1111.34	1114.42	1038.62	1387.77	1570.35
NM_001113378.2	2273.21	2173.57	2313.47	1946.17	2301.51	2087.51
NM_001113407.3	3329.2	3398.14	3338.55	2964.01	3337.92	3381.74
NM_001113490.2	1129.66	1241.61	1172.02	922.918	1009.91	988.441
NM_001113491.2	13642.5	15063.7	13870.3	8944.44	11096.3	11342.3
NM_001113528.2	258.392	206.434	237.46	353.439	314.065	366.955
NM_001113738.2	273.34	269.567	273.902	331.744	402.395	299.5
NM_001114092.2	1333.6	1311.76	1194.35	819.87	778.292	808.561
NM_001114118.3	2111.98	1810.81	1698.66	2651.24	2376.1	2500.33
NM_001114120.3	437.772	498.047	520.766	584.846	580.038	540.539
NM_001114122.3	1291.96	1257.64	1278.99	1228.45	1318.09	1278.05
NM_001114394.3	513.581	485.019	524.293	458.295	408.284	476.682
NM_001114600.3	6556.97	6851.4	6771.14	6314.89	6582.6	7012.62
NM_001115016.3	1600.54	1656.48	1631.66	1803.35	1815.69	1826.68
NM_001116.4	305.372	211.444	310.344	376.941	379.822	369.653
NM_001122.4	438.839	403.849	390.281	192.538	236.53	311.192
NM_001122630.2	842.444	1164.45	935.734	1184.16	1486.9	1667.49
NM_001122659.3	1456.39	1772.73	1826.8	2342.1	2112.09	2096.5
NM_001122764.3	199.667	201.423	260.971	170.844	199.235	172.685
NM_001122769.3	116.383	106.223	125.783	205.193	163.903	183.478
NM_001122955.4	4550.69	5071.66	4528.2	4783.63	4812.06	4543.77
NM_001122964.3	1515.12	1395.93	1393.02	2055.55	1756.8	1812.29
NM_001123329.2	935.337	808.7	1014.5	1274.55	1091.37	1099.97
NM_001123363.4	0	2.00421	165.752	19.8866	1980.57	62.958
NM_001123375.3	2.13547	3.00632	1.17554	8.13542	2.94436	5.3964
NM_001123385.2	1856.79	1659.49	1918.49	3365.35	4182.95	4543.77
NM_001124.3	2286.02	2700.68	2448.66	3906.81	3070.96	3001.3
NM_001124767.2	171.905	232.489	198.667	159.997	188.439	192.472
NM_001126.5	1191.59	1086.28	1269.59	1322.46	1196.39	1126.05
NM_001126111.3	687.622	588.236	671.236	1411.95	1184.61	1065.79
NM_001126340.3	2934.14	2894.08	3016.45	4552.22	4283.06	4660.69
NM_001127.4	2041.51	1845.88	2060.73	1718.38	1888.31	2022.75
NM_001127178.3	437.772	412.868	447.883	493.549	503.485	539.64
NM_001127202.4	736.738	666.401	762.929	832.525	796.939	876.016
NM_001127208.3	522.123	501.053	587.772	1555.67	1587.01	1571.25
NM_001127211.3	335.269	336.708	352.663	443.832	396.507	325.583
NM_001127228.2	5156.1	5819.23	5130.08	4975.26	5079.02	5087.01
NM_001127453.2	636.371	626.316	561.91	503.492	483.856	510.859
NM_001127496.3	3946.35	3889.17	4019.19	5804.17	7112.58	6625.88
NM_001127649.3	1830.1	1854.9	1461.2	1733.75	1642.95	1681.88
NM_001127671.2	3240.58	3246.82	4356.57	4906.56	4867.02	4792.9
NM_001127898.4	445.246	473.996	464.34	395.02	387.674	429.014
NM_001128.6	1853.59	1877.95	1913.79	2512.94	2292.67	2307.86
NM_001128126.3	296.831	269.567	210.422	252.198	230.641	226.649
NM_001128148.3	1390.19	1317.77	1508.22	1928.09	1699.88	1712.46
NM_001128159.3	1015.42	1077.26	1003.92	950.94	941.213	949.766
NM_001128174.3	156.957	186.392	146.943	166.324	118.756	143.904
NM_001128203.2	420.688	408.859	351.488	257.622	283.64	322.885
NM_001128205.2	270.137	289.609	333.855	334.456	312.102	262.625
NM_001128214.2	316.05	314.661	292.711	277.508	234.567	230.246
NM_001128219.3	2195.26	2375.99	2146.54	4055.06	3867.9	3878.21
NM_001128424.2	286.153	317.668	351.488	708.686	481.893	490.173
NM_001128431.4	765.567	772.624	861.674	977.154	1073.71	983.944
NM_001128591.2	286.153	377.794	270.375	210.617	207.086	187.075
NM_001128626.2	628.896	536.127	608.932	953.652	989.304	915.589
NM_001128636.4	4548.55	3923.25	3722.95	3848.05	4234.97	4317.12
NM_001128917.2	2846.58	2939.18	2902.42	2424.36	2703.9	2899.67
NM_001128918.3	1575.98	1652.47	1495.29	2340.29	2201.4	2147.77
NM_001129.5	1333.6	1214.55	1337.77	1612.62	1643.93	1859.06
NM_001129993.3	506.107	508.068	463.165	649.026	565.316	580.113
NM_001129994.2	1766.04	1814.81	1949.05	3068.86	2711.75	2899.67
NM_001130.6	6453.4	7682.15	7282.5	5293.45	6300.92	6571.02
NM_001130004.2	4530.4	4559.58	5126.55	4620.02	4660.92	4368.39
NM_001130009.3	829.631	754.586	814.652	579.423	594.76	562.125
NM_001130021.3	1573.84	1631.43	1315.43	1338.73	1277.85	1218.69
NM_001130028.2	393.995	368.775	333.855	817.158	805.772	777.082
NM_001130031.2	778.379	676.422	530.171	697.838	674.258	636.775
NM_001130040.2	12019.5	11181.5	12146.9	7148.32	8602.43	8496.63
NM_001130053.5	6321	6839.38	6001.16	5103.62	4935.72	5051.93
NM_001130058.2	197.531	192.404	216.3	396.828	266.955	277.015
NM_001130072.2	3354.83	3563.49	3407.9	3392.47	3757.98	3901.6
NM_001130082.3	1707.31	1441.03	1559.95	2101.65	1917.76	2112.69
NM_001130100.2	726.06	803.689	844.041	1560.19	1531.07	1626.12
NM_001130111.2	3421.03	3611.59	3464.33	2634.97	2987.54	3127.21
NM_001130142.2	247.715	198.417	231.582	193.442	192.365	211.359
NM_001130144.3	785.854	830.746	872.254	889.473	812.642	869.72
NM_001130145.3	3043.05	2879.05	3353.83	4639.9	4339.98	4583.34
NM_001130158.3	1176.64	1344.83	1329.54	1412.85	1552.66	1649.5
NM_001130438.3	3781.92	3793.97	3720.6	5045.77	4526.46	4572.55
NM_001130445.3	1163.83	1182.49	1344.82	1620.76	1558.55	1460.63
NM_001130475.3	602.203	615.293	766.455	472.758	438.709	429.913
NM_001130520.3	908.643	935.967	766.455	709.589	732.163	646.669
NM_001130528.3	4402.27	4103.63	4502.34	6202.81	5124.16	4765.92
NM_001130823.3	2282.82	2340.92	2547.41	3507.27	3295.72	3574.22
NM_001130842.2	1058.13	954.005	979.229	2832.93	2731.38	2622.65
NM_001130864.2	594.729	580.22	592.475	483.606	524.095	560.326
NM_001130919.3	733.534	861.811	745.295	494.453	579.057	578.314
NM_001130924.3	600.068	492.034	513.713	670.72	624.204	706.928
NM_001130929.2	1952.89	2032.27	1923.19	1391.16	1435.86	1597.33
NM_001130963.2	2676.81	2459.17	2577.97	2599.72	2494.85	2466.15
NM_001130965.3	1778.85	1548.25	1571.7	1759.06	1654.73	1618.92
NM_001131007.2	363.03	383.807	357.366	461.911	408.284	420.919
NM_001131016.2	1878.15	1757.69	1696.31	2874.52	2765.73	2975.21
NM_001131035.2	649.183	630.325	618.337	507.108	396.507	452.398
NM_001134225.2	698.299	754.586	768.806	1233.87	1290.61	1177.31
NM_001134231.2	6729.94	6481.62	6360.87	8081.18	7731.88	7779.81
NM_001134232.2	1042.11	985.071	1316.61	1045.85	944.157	934.477
NM_001134337.3	502.904	383.807	425.547	1039.53	869.567	870.619
NM_001134375.2	1517.25	1514.18	1683.38	2187.52	1852	1824.88
NM_001134382.3	1179.85	956.009	1176.72	1304.38	1524.2	1604.53
NM_001134389.2	1093.36	1098.31	1059.17	756.594	791.05	742.904
NM_001134398.2	1005.81	1086.28	1053.29	1019.64	1149.28	1144.94
NM_001134438.2	1135	1223.57	1283.69	1256.47	1352.44	1225.88
NM_001134479.2	1183.05	994.09	1263.71	429.369	549.613	488.374
NM_001134647.2	161.228	177.373	169.278	297.395	312.102	292.305
NM_001134665.3	226.36	238.501	245.689	245.87	188.439	183.478
NM_001134693.2	3328.13	4148.72	2956.49	1964.25	2452.65	2639.74
NM_001134831.2	357.691	330.695	365.594	581.231	442.635	430.813
NM_001135036.2	74.7415	70.1474	61.1283	45.1968	38.2766	33.2778
NM_001135179.2	1427.56	1357.85	1394.2	1754.54	1601.73	1607.23
NM_001135553.4	312.847	317.668	374.999	296.491	327.805	280.613
NM_001135570.3	251.986	287.605	229.231	308.242	354.304	313.891
NM_001135586.1	1642.18	1487.13	1939.65	2356.56	2059.09	2038.04
NM_001135629.3	410.011	364.767	459.638	371.518	359.212	442.505
NM_001135638.2	1617.62	1403.95	1622.25	2999.26	2284.82	2256.59
NM_001135651.3	1736.14	1736.65	1740.98	1684.03	1702.82	1662.09
NM_001135653.2	3966.64	3752.89	3840.5	4040.59	3761.91	3838.64
NM_001135673.4	715.383	688.447	603.054	1176.92	1006.97	997.435
NM_001135674.2	765.567	807.698	698.274	527.898	423.006	518.054
NM_001135726.3	56.59	43.0906	52.8995	243.159	126.607	134.91
NM_001135812.2	2940.54	3038.39	3106.96	3668.17	3558.75	3382.64
NM_001135993.2	161.228	150.316	139.89	178.979	199.235	193.371
NM_001135998.3	1971.04	2174.57	2005.48	1650.59	1685.15	1695.37
NM_001136018.4	496.497	554.165	526.644	453.776	405.34	387.641
NM_001136035.4	719.654	762.603	791.142	686.087	702.72	692.538
NM_001136044.2	1649.65	1667.51	1594.04	1304.38	1321.03	1641.4
NM_001136050.3	359.827	386.813	473.745	292.875	310.139	303.997
NM_001136108.3	779.447	784.649	802.897	610.157	649.721	785.176
NM_001136139.4	1022.89	1046.2	928.68	1552.96	1494.75	1706.16
NM_001136156.2	908.643	977.054	1007.44	705.07	765.533	753.697
NM_001136157.2	1617.62	1595.35	1606.97	1617.14	1371.09	1482.21
NM_001136191.3	918.253	783.647	820.53	610.157	690.942	803.164
NM_001136193.2	1005.81	866.822	965.122	774.673	790.069	753.697
NM_001136200.2	676.944	632.329	728.838	699.646	607.519	650.266
NM_001136201.2	797.599	992.085	818.179	600.213	686.035	623.284
NM_001136203.2	2181.38	2435.12	2163	1479.74	1835.32	1931.91
NM_001136223.3	824.292	826.738	900.467	642.698	699.775	629.58
NM_001136262.2	3554.49	3812.01	3754.69	3368.97	3507.71	3518.45
NM_001136265.2	1082.68	1243.61	1115.59	5942.47	5010.31	5234.51
NM_001136472.2	1045.31	1013.13	994.511	1042.24	1058.99	1098.17
NM_001136528.2	313.914	309.651	351.488	408.579	358.23	327.382
NM_001137550.2	406.807	390.821	429.074	393.212	398.47	432.611
NM_001137608.3	118.519	122.257	94.0436	141.918	124.644	103.431
NM_001137675.4	1170.24	1058.22	1247.25	2052.84	1624.3	1707.06
NM_001141947.3	171.905	168.354	134.012	153.669	159.977	152.898
NM_001141969.2	1537.54	1488.13	1436.52	2127.86	2026.7	1981.38
NM_001141980.3	2098.1	1980.16	2144.19	2315.88	2592.02	2351.93
NM_001142276.2	12044.1	13162.7	12884	13517.5	13575.4	13719.4
NM_001142286.2	847.782	821.727	974.527	1141.67	952.99	933.577
NM_001142327.2	1546.08	1652.47	1623.43	1936.23	1750.91	1605.43
NM_001142416.2	1054.92	1060.23	940.436	782.808	824.42	777.082
NM_001142524.2	402.536	403.849	394.983	310.05	287.565	309.394
NM_001142551.2	536.003	482.013	559.559	464.623	482.874	459.593
NM_001142556.2	936.404	960.018	982.755	1100.99	1105.12	974.05
NM_001142565.3	2654.39	2812.91	2579.15	3101.4	3120.04	3241.44
NM_001142568.3	719.654	754.586	865.201	1260.99	1159.1	1037.91
NM_001142569.3	826.428	831.748	912.223	785.52	870.548	1046
NM_001142572.2	195.396	246.518	136.363	136.494	145.255	130.413
NM_001142616.3	809.344	869.828	985.106	1319.75	1388.75	1233.08
NM_001142684.2	310.711	309.651	283.306	358.862	355.286	348.068
NM_001142725.2	580.848	724.523	777.035	429.369	385.711	387.641
NM_001142730.3	733.534	703.479	744.12	710.493	793.995	829.247
NM_001142749.3	564.832	507.066	565.437	571.287	547.65	491.972
NM_001142782.2	470.871	496.043	497.255	610.157	602.612	565.723
NM_001142930.2	3118.86	3083.48	3470.21	3218.01	3201.5	3070.55
NM_001142966.3	1222.56	1232.59	1249.6	1359.52	1530.08	1371.58
NM_001143667.2	1202.27	1344.83	1239.02	1053.09	1137.5	1004.63
NM_001143674.4	351.285	443.933	345.61	295.587	370.989	321.086
NM_001143676.3	164.431	157.331	156.347	332.648	127.589	156.496
NM_001143688.3	611.813	485.019	568.964	614.676	616.352	611.592
NM_001143775.2	2291.36	2497.25	2435.73	1947.08	2118.96	2171.15
NM_001143780.3	1583.45	1728.63	1596.39	1231.16	1285.7	1461.52
NM_001143820.2	1406.21	1291.72	1235.5	1564.71	974.582	997.435
NM_001143835.2	582.984	494.038	578.368	809.022	775.347	701.532
NM_001143842.2	1533.27	1714.6	1661.04	1377.6	1541.86	1386.87
NM_001143852.2	465.533	446.939	572.49	374.229	509.374	481.179
NM_001143992.2	531.732	533.121	591.299	482.702	525.077	501.865
NM_001143998.2	4144.95	4654.78	4705.71	4396.74	4626.57	4852.26
NM_001144.6	1806.61	1703.58	1789.18	1982.33	1867.7	1890.54
NM_001144060.2	1139.27	1326.79	1263.71	1520.42	1864.76	1874.35
NM_001144061.2	1798.07	1716.61	2130.09	2714.52	2505.65	2465.26
NM_001144068.2	496.497	495.041	477.271	207.905	264.011	256.329
NM_001144072.2	726.06	694.46	728.838	856.931	851.901	822.052
NM_001144757.3	208.208	196.413	171.63	128.359	163.903	166.389
NM_001144758.3	1767.1	1680.53	1699.84	2206.51	2606.74	2800.73
NM_001144831.2	5386.73	5359.26	5353.43	4348.83	4738.45	4560.86
NM_001144877.3	279.747	301.634	304.466	439.313	316.028	346.269
NM_001144888.2	1366.7	1116.35	1236.67	1954.31	1445.68	1597.33
NM_001144952.2	1831.17	1740.66	1756.26	1938.94	1971.74	2102.8
NM_001144955.2	434.568	399.84	478.447	335.36	313.083	336.376
NM_001144967.3	442.043	412.868	477.271	724.956	726.275	724.916
NM_001144989.2	342.743	379.798	320.924	423.946	398.47	418.221
NM_001144995.2	1857.86	1628.42	1555.25	2748.87	2730.4	2976.11
NM_001145064.3	774.108	720.514	639.496	1411.95	1315.15	1378.78
NM_001145108.2	3074.01	2827.94	3224.52	4006.24	3579.36	3655.16
NM_001145191.2	816.818	863.816	853.445	775.577	649.721	647.568
NM_001145206.2	390.791	312.657	346.786	524.283	420.062	425.416
NM_001145263.2	2333	2199.62	2266.45	2488.53	2510.55	2478.75
NM_001145306.2	6071.15	5921.45	6231.56	7672.61	6721.97	6605.19
NM_001145312.3	744.212	701.474	805.248	1173.31	1143.39	1200.7
NM_001145313.3	396.13	384.809	524.293	525.187	418.099	405.629
NM_001145315.2	791.192	817.719	695.922	507.108	657.573	576.515
NM_001145344.1	292.56	331.697	271.551	222.368	238.493	222.152
NM_001145358.2	1404.07	1490.13	1388.32	1496.92	1623.32	1615.32
NM_001145365.3	502.904	549.154	446.707	607.445	577.094	596.302
NM_001145374.2	442.043	420.885	371.472	190.73	168.81	232.045
NM_001145418.2	1398.73	1439.02	1451.8	2041.09	1850.04	1964.29
NM_001145440.3	67.2674	58.1222	41.1441	26.2141	51.0355	35.976
NM_001145450.3	369.437	443.933	315.046	331.744	291.491	324.683
NM_001145543.2	2607.41	2732.74	2696.7	916.591	1031.51	1009.13
NM_001145638.3	1581.32	1437.02	1480.01	2100.75	1766.61	1847.37
NM_001145667.2	2949.09	3386.12	3210.41	3457.55	3591.13	3692.04
NM_001145860.2	370.504	347.731	332.679	419.426	394.544	393.937
NM_001146.5	136.67	115.242	143.416	258.526	204.142	205.063
NM_001146069.2	1773.51	1890.97	1731.58	1454.43	1617.43	1652.2
NM_001146070.2	262.663	216.455	237.46	240.447	308.176	245.536
NM_001146105.2	235.97	266.56	236.284	195.25	240.456	195.17
NM_001146108.2	960.962	964.026	900.467	882.241	891.159	889.507
NM_001146154.2	146.28	175.369	145.768	133.782	96.1823	122.318
NM_001146156.2	2028.7	1927.05	2087.77	3304.79	2853.08	2808.83
NM_001146213.3	480.481	555.167	632.443	557.728	577.094	561.226
NM_001146274.2	928.93	891.875	905.169	840.66	825.401	935.376
NM_001146334.2	549.884	449.946	496.08	540.554	484.837	471.286
NM_001148.6	1313.32	1259.65	1263.71	1446.3	1515.36	1447.13
NM_001151.4	1073.07	1042.19	1009.79	891.281	798.902	898.501
NM_001152.5	5119.79	5104.73	4684.55	4916.51	4965.17	4791.1
NM_001153484.2	1529	1734.65	1917.31	1158.85	1117.87	1210.59
NM_001154.4	6073.28	5926.46	5379.29	8062.2	7063.51	7354.39
NM_001155.5	4606.21	4365.18	4976.08	4430.19	4974.98	4840.57
NM_001156.5	1309.04	1324.78	1290.75	945.517	1007.95	938.074
NM_001159699.2	421.756	517.087	425.547	511.628	329.768	364.257
NM_001159702.3	234.902	96.2022	128.134	188.019	199.235	188.874
NM_001159773.2	2098.1	2142.5	2422.8	1856.68	1925.61	1815.89
NM_001160148.2	715.383	694.46	700.625	1498.73	1303.37	1193.5
NM_001160372.4	461.262	472.994	516.064	469.143	436.746	448.801
NM_001161.5	593.661	626.316	480.798	338.072	372.952	309.394
NM_001161346.2	1241.78	1246.62	1187.3	865.97	968.693	1036.11
NM_001162371.3	3324.93	3844.08	3345.6	2733.5	2823.64	3179.38
NM_001162383.2	1248.18	1301.74	1235.5	1255.57	1264.11	1435.44
NM_001162498.3	164.431	181.381	175.156	282.028	416.136	397.535
NM_001162499.2	307.508	226.476	276.253	225.08	300.324	246.436
NM_001162501.2	933.201	1156.43	1015.67	1185.06	1278.83	1191.7
NM_001162529.3	342.743	382.805	429.074	516.147	449.505	431.712
NM_001162536.3	615.016	498.047	605.406	453.776	348.416	436.209
NM_001163315.3	463.397	412.868	526.644	460.103	454.412	500.066
NM_001163424.2	1676.35	2133.48	1193.18	1374.89	1481.01	1470.52
NM_001163435.3	341.675	391.824	403.212	421.234	464.227	349.867
NM_001163735.2	796.531	655.378	798.195	726.764	799.884	857.128
NM_001163788.4	1598.4	1535.23	1635.18	1903.69	1585.05	1599.13
NM_001164.5	1307.98	1360.86	1416.53	1392.96	1392.68	1373.38
NM_001164094.2	1354.96	1262.65	1354.23	842.468	910.788	848.134
NM_001164161.2	1766.04	1832.85	2020.76	2925.14	2645.01	2618.15
NM_001164211.2	55.5223	24.0506	65.8305	103.953	81.4605	87.2418
NM_001164273.2	941.743	929.955	1095.61	849.7	845.03	806.762
NM_001164380.2	745.28	702.477	753.524	940.997	897.047	852.631
NM_001164463.1	282.95	265.558	280.955	800.887	506.429	559.427
NM_001164473.3	2583.92	2558.38	2433.38	3732.35	3517.52	3386.24
NM_001164664.2	290.424	263.554	286.833	244.967	276.77	223.051
NM_001164665.2	702.57	778.637	913.398	1376.69	1452.55	1421.05
NM_001164760.2	444.178	428.902	487.851	381.461	364.119	415.523
NM_001165963.4	481.549	584.228	547.804	473.662	569.242	599
NM_001166.5	1265.27	1358.86	1405.95	1349.58	1431.94	1344.6
NM_001166037.2	1135	1127.37	1226.09	1082.01	982.434	904.796
NM_001166105.3	765.567	727.529	789.966	267.565	363.137	333.677
NM_001166108.2	8667.88	9238.42	8790.72	10908.7	8956.73	8634.24
NM_001166114.2	720.722	731.538	762.929	749.363	694.868	721.319
NM_001166160.2	543.478	552.161	509.011	592.982	631.074	599.9
NM_001166269.2	507.175	668.405	558.384	434.793	531.947	479.38
NM_001166271.3	1900.57	1893.98	2221.78	2622.32	2674.46	2619.95
NM_001166293.2	713.248	732.54	805.248	1271.84	1031.51	970.453
NM_001166412.2	2330.87	1924.04	2130.09	3020.05	2145.45	2392.4
NM_001166693.3	767.702	701.474	844.041	901.224	947.101	894.004
NM_001167.4	1223.63	1210.54	1097.96	1185.06	1177.74	1189.91
NM_001167608.3	574.442	579.217	526.644	458.295	476.004	430.813
NM_001167675.2	531.732	626.316	771.157	916.591	718.423	728.514
NM_001167740.2	177.244	205.432	173.981	241.351	194.328	195.17
NM_001167856.3	950.285	1058.22	989.809	1666.86	1481.99	1408.46
NM_001168.3	4064.87	4682.84	4484.7	3726.93	4004.32	3904.3
NM_001168241.2	1180.92	995.092	1018.02	1510.48	1391.7	1523.58
NM_001168243.4	1551.42	1691.56	1157.91	989.81	1108.06	1421.95
NM_001168368.2	512.513	488.026	486.675	579.423	490.726	461.392
NM_001168478.2	278.679	311.655	302.115	110.28	164.884	156.496
NM_001168618.2	450.585	460.969	457.287	339.88	337.62	311.192
NM_001170535.3	1235.37	1099.31	1167.32	1015.12	1250.37	1177.31
NM_001170543.2	1470.27	1468.09	1605.79	1240.2	1263.13	1342.8
NM_001170629.2	1498.03	1527.21	1666.92	1966.06	1961.92	1945.4
NM_001170795.4	1304.77	1527.21	1488.24	923.822	1071.75	1087.37
NM_001171136.2	1585.59	1483.12	1729.23	2995.64	3353.62	3707.33
NM_001171155.2	244.511	382.805	313.87	147.342	258.122	268.021
NM_001171251.3	307.508	271.571	336.206	253.102	268.918	246.436
NM_001171613.2	1897.37	1852.89	2112.45	1744.6	1636.08	1591.94
NM_001172173.2	309.643	363.765	420.845	520.667	529.984	388.541
NM_001172303.3	605.406	569.196	665.358	1284.49	1048.19	1064.89
NM_001172638.2	651.319	601.264	573.666	186.211	273.825	245.536
NM_001172773.2	407.875	450.948	409.09	235.927	301.306	279.713
NM_001172774.2	2011.61	2026.26	2201.8	2201.08	2110.12	2054.23
NM_001173464.2	848.85	823.731	1002.74	1524.94	1314.16	1294.24
NM_001173524.2	1366.7	1492.14	1842.08	1604.49	1285.7	1355.4
NM_001174072.3	336.337	325.685	385.579	217.848	270.881	268.921
NM_001174096.2	1153.15	1240.61	1329.54	1528.56	1691.04	1800.6
NM_001174100.2	1377.38	1527.21	1407.13	1166.98	1150.26	1246.57
NM_001174150.2	422.823	425.895	444.356	566.768	434.783	471.286
NM_001174156.2	989.791	919.934	1053.29	1411.04	1210.13	1208.79
NM_001177.6	1001.54	1112.34	1062.69	911.167	925.509	898.501
NM_001177306.2	6140.55	5888.38	6972.16	7062.45	7144.97	7172.71
NM_001177382.2	429.23	476.001	551.33	779.193	641.87	664.657
NM_001177479.2	138.806	165.348	171.63	218.752	148.199	158.294
NM_001177701.3	414.281	510.072	380.876	337.168	384.729	351.665
NM_001178139.2	1846.12	1962.12	1353.05	2623.22	2635.2	2610.06
NM_001182.5	2379.98	2690.66	2521.54	2330.35	2345.67	2228.71
NM_001183.6	3227.77	3155.63	3406.73	2943.21	3222.11	3067.85
NM_001184.4	446.314	420.885	532.522	323.609	369.026	338.174
NM_001184742.2	665.199	630.325	615.985	969.019	881.344	889.507
NM_001184785.2	1265.27	972.043	1190.83	1679.51	1630.19	1668.39
NM_001184819.2	1216.15	1273.68	704.151	1248.34	1173.82	1311.33
NM_001184880.2	351.285	383.807	461.989	867.778	610.463	656.562
NM_001184900.3	398.265	562.182	503.133	493.549	538.817	504.563
NM_001184940.2	1880.28	1861.91	2126.56	2041.09	1859.85	2177.45
NM_001184970.3	1963.57	2090.39	1978.44	1693.07	1782.32	1827.58
NM_001184989.2	922.524	1214.55	941.611	734.9	806.754	824.75
NM_001185072.3	708.977	757.592	853.445	595.694	601.63	595.403
NM_001185181.3	482.617	656.38	674.763	284.74	387.674	431.712
NM_001186.4	1100.84	1135.39	1184.95	1943.46	1531.07	1507.39
NM_001190.4	904.372	836.759	966.298	454.68	528.021	522.551
NM_001190274.2	1315.45	1440.03	1478.84	2250.8	2167.05	2001.16
NM_001190467.2	839.24	825.736	757.051	669.816	559.428	679.047
NM_001190737.2	982.317	993.087	1119.12	932.862	899.992	894.903
NM_001190850.2	268.002	216.455	251.567	385.077	313.083	283.311
NM_001190946.3	606.474	568.194	537.224	665.297	647.758	604.397
NM_001191057.4	156.957	172.362	182.209	283.836	234.567	251.832
NM_001191061.2	1586.66	1587.34	1519.98	1178.73	1263.13	1398.57
NM_001193315.2	482.617	463.975	504.309	223.272	284.621	317.488
NM_001193360.2	686.554	722.519	751.173	586.654	687.998	638.574
NM_001193369.2	1633.64	1436.02	1476.48	2573.5	2576.31	2521.92
NM_001193424.2	929.998	891.875	935.734	1061.22	899.992	938.974
NM_001193489.2	1169.17	1026.16	1113.24	1172.4	1209.15	1095.47
NM_001193511.2	450.585	412.868	425.547	301.011	335.657	392.138
NM_001193552.2	412.146	509.07	389.105	182.595	209.049	175.383
NM_001194998.2	266.934	261.55	271.551	341.688	341.545	337.275
NM_001195248.2	791.192	816.717	694.747	429.369	471.097	518.954
NM_001195305.3	360.895	416.876	394.983	334.456	350.378	390.34
NM_001195427.2	10742.5	10968.1	10193.1	12809.7	12292.7	12571.8
NM_001195518.2	1189.46	1215.56	1114.42	1076.59	1017.77	1108.06
NM_001195553.2	1120.05	1058.22	1156.74	1437.26	990.285	1013.62
NM_001195626.3	1020.76	1039.18	1092.08	1091.05	1110.02	1097.27
NM_001197026.2	982.317	845.778	971	1419.18	1257.24	1239.37
NM_001197104.2	1813.02	1422.99	1590.51	3035.42	2825.6	2584.88
NM_001197293.3	7761.37	9023.97	8202.95	5341.36	5457.86	5499.83
NM_001197294.2	14143.2	12597.5	13518.8	16208.5	12664.7	12954.1
NM_001198533.2	323.524	409.862	422.021	438.409	402.395	365.156
NM_001198800.3	671.606	644.354	603.054	510.724	550.595	471.286
NM_001198934.2	343.811	339.714	425.547	292.875	346.453	371.452
NM_001198950.3	180.447	188.396	188.087	244.967	278.732	284.21
NM_001198956.2	423.891	415.874	357.366	707.782	619.296	552.232
NM_001199.4	35.2353	36.0758	36.4419	48.8125	48.0912	26.0826
NM_001199135.3	260.528	234.493	290.36	489.933	387.674	422.718
NM_001199140.2	1003.67	912.919	994.511	2197.47	1880.46	1880.65
NM_001199161.2	827.495	728.531	875.781	681.567	697.813	673.651
NM_001199165.4	364.098	343.722	399.685	414.003	459.32	417.322
NM_001199196.2	1105.11	1096.3	1188.48	1066.64	1273.92	1272.65
NM_001199198.3	573.374	509.07	641.847	579.423	513.299	491.972
NM_001199251.3	242.376	241.508	252.742	375.133	332.712	341.772
NM_001199260.2	576.577	617.298	571.315	885.857	700.757	644.87
NM_001199261.3	860.595	872.835	899.292	816.254	742.959	693.437
NM_001199298.2	433.501	421.887	424.372	463.719	498.578	511.759
NM_001199383.2	2762.23	2543.35	2515.67	4172.57	3689.28	3785.57
NM_001199397.3	371.572	346.729	393.807	503.492	423.006	392.138
NM_001199417.2	1917.65	1971.14	1855.01	1275.45	1807.83	1868.05
NM_001199753.2	933.201	936.969	1020.37	647.218	819.513	795.969
NM_001199867.2	891.559	943.984	865.201	1306.19	1162.04	1269.95
NM_001201338.2	2031.9	2314.87	2353.44	3364.45	3513.6	3799.07
NM_001201380.3	156.957	157.331	212.774	99.4329	187.457	201.466
NM_001201543.2	420.688	356.75	366.77	350.727	366.082	328.281
NM_001202438.2	538.139	471.992	500.782	774.673	781.236	607.994
NM_001202439.3	245.579	189.398	208.071	944.613	702.72	711.425
NM_001203.3	497.565	512.076	469.042	754.786	525.077	568.421
NM_001204.7	980.181	892.877	987.458	7435.77	5259.6	5429.68
NM_001204077.2	787.989	720.514	881.659	852.411	857.789	792.371
NM_001205.3	282.95	285.6	236.284	216.041	229.66	216.755
NM_001205019.2	149.483	119.251	221.002	185.307	192.365	160.993
NM_001206427.2	969.504	904.902	705.327	876.818	952.99	834.643
NM_001206641.3	365.166	422.889	369.121	369.71	317.991	368.754
NM_001206998.2	925.727	740.557	929.856	1668.67	1626.27	1565.86
NM_001206999.2	827.495	972.043	942.787	1152.52	1204.24	1126.95
NM_001207067.2	10461.7	10618.3	10495.3	11052.4	10146.3	9994.13
NM_001211.6	1106.17	1208.54	1268.41	1893.75	1881.44	1867.15
NM_001212.4	4254.93	4010.43	3570.13	3404.22	3574.45	3844.04
NM_001214909.2	1251.39	1310.76	1196.7	5781.57	5663.96	5820.92
NM_001218.5	965.233	1010.12	1092.08	479.086	749.829	743.804
NM_001219.5	8224.77	8199.23	8202.95	7939.27	8006.69	7958.79
NM_001226.4	467.668	441.929	510.186	369.71	367.063	398.434
NM_001227.5	413.214	367.773	366.77	277.508	232.604	259.027
NM_001229.5	348.082	351.739	366.77	248.582	233.586	264.424
NM_001235.5	13254.9	15012.6	14433.3	9378.33	11076.7	10780.2
NM_001237.5	1947.55	1924.04	2231.18	2577.12	2623.42	2429.28
NM_001238.4	585.119	618.3	576.017	441.121	489.745	537.841
NM_001239.4	336.337	321.676	322.099	397.732	354.304	351.665
NM_001240.4	1186.25	944.986	1102.66	1353.19	1174.8	1175.52
NM_001242318.3	935.337	925.946	893.414	1375.79	1222.89	1150.33
NM_001242481.2	650.251	593.247	474.92	691.511	689.961	701.532
NM_001242532.5	258.392	261.55	315.046	325.417	325.842	307.595
NM_001242809.2	1142.48	1092.3	1021.55	1580.08	1295.52	1322.12
NM_001242818.2	890.492	868.826	923.978	940.093	899.992	789.673
NM_001242835.2	1687.02	1751.68	1764.49	1576.46	1664.54	1630.61
NM_001242850.2	1032.5	1138.39	972.175	643.602	767.496	752.798
NM_001242868.2	970.572	1066.24	1035.65	1380.31	1411.33	1352.7
NM_001242896.3	282.95	332.699	317.397	310.05	350.378	295.903
NM_001242898.2	1116.85	1252.63	1211.99	1074.78	1122.78	1132.34
NM_001243177.4	14425.1	16073.8	13933.7	11610.1	12770.7	12919.9
NM_001243332.2	1187.32	1212.55	1160.26	957.268	911.769	989.34
NM_001243351.2	655.59	725.525	626.565	611.061	631.074	623.284
NM_001243439.2	926.795	1043.19	927.505	1246.53	1229.76	1289.74
NM_001243925.2	1122.19	1174.47	1102.66	892.184	928.454	910.193
NM_001244008.2	3971.98	4163.75	3892.23	5796.94	5515.76	5891.07
NM_001244710.2	671.606	741.559	726.487	1372.17	1110.02	1133.24
NM_001244926.2	1582.38	1458.06	1601.09	1322.46	1340.66	1244.77
NM_001244949.2	732.467	721.517	801.721	423.042	480.912	441.605
NM_001247.5	1651.79	1745.67	1709.24	1358.62	1503.58	1534.38
NM_001247997.2	1425.43	1377.9	1357.75	1828.66	1704.78	1594.64
NM_001251845.2	430.298	453.954	432.6	344.399	309.157	294.104
NM_001252078.2	544.545	480.009	606.581	758.402	696.831	633.178
NM_001253.4	1138.21	1405.96	1271.94	1643.36	1562.47	1586.54
NM_001253697.2	2978.98	3252.84	3425.54	6710.82	4657.97	4907.13
NM_001253852.3	558.426	466.982	440.829	197.058	244.382	207.761
NM_001253875.2	1600.54	1476.1	1357.75	954.556	1319.07	1220.49
NM_001254.4	1463.87	1625.42	1586.99	1792.5	1875.56	1888.74
NM_001255.3	2467.54	2646.56	2609.71	2490.34	2743.16	2723.38
NM_001256.6	1314.38	1226.58	1375.39	2440.63	2044.36	2024.55
NM_001256007.3	440.975	451.95	514.889	626.427	572.187	555.829
NM_001256012.3	15266.5	16523.7	15952.1	14320.1	14737.5	14335.5
NM_001256071.3	847.782	734.544	925.154	1287.2	1340.66	1192.6
NM_001256141.2	445.246	449.946	551.33	272.085	285.603	270.719
NM_001256155.3	505.039	667.403	628.916	668.912	720.386	696.136
NM_001256378.2	2197.4	2085.38	2208.85	2702.77	2516.44	2369.92
NM_001256409.2	781.583	764.607	861.674	615.58	717.442	700.633
NM_001256447.2	2602.07	2908.11	2666.14	2250.8	2559.63	2592.07
NM_001256470.2	874.476	832.75	761.753	1326.07	1194.43	1169.22
NM_001256545.2	1331.47	1445.04	1626.95	1345.96	1534.99	1542.47
NM_001256660.2	2227.3	2194.61	2231.18	1982.33	2063.99	2250.3
NM_001256686.2	0	0	19.9843	122.935	57.9057	26.982
NM_001256706.2	140.941	145.305	193.965	120.223	121.7	94.437
NM_001256798.2	1313.32	1104.32	979.229	1355	1436.85	1317.62
NM_001256864.2	256.257	228.48	212.774	293.779	180.587	190.673
NM_001256875.2	1139.27	1218.56	1199.06	1171.5	1339.68	1410.26
NM_001257180.2	643.845	714.502	714.731	646.314	532.929	554.93
NM_001258038.2	2177.11	2223.67	2206.5	3228.86	3682.41	3653.36
NM_001258217.2	676.944	738.552	611.283	584.846	561.391	541.439
NM_001258249.2	287.221	308.649	286.833	264.853	327.805	305.796
NM_001258308.2	894.763	741.559	677.114	1163.37	1147.32	1048.7
NM_001258315.2	1347.48	1437.02	1655.17	2246.28	1976.64	2033.54
NM_001258374.3	533.868	505.062	493.729	746.651	703.701	735.709
NM_001258392.3	532.8	504.06	477.271	481.798	543.725	451.499
NM_001258419.2	214.615	173.364	280.955	367.902	303.269	365.156
NM_001258429.2	1557.83	1585.33	1507.05	1073.88	1094.32	1173.72
NM_001260.3	554.155	634.333	654.778	537.842	533.91	586.409
NM_001261.4	1023.96	929.955	898.116	1060.32	1050.15	1008.23
NM_001261413.2	2956.56	2725.73	2764.88	2662.09	3016.98	3037.27
NM_001261434.2	579.781	578.215	527.82	441.121	384.729	438.008
NM_001261826.3	3686.89	3020.35	3293.88	4067.71	3993.53	4328.81
NM_001261833.2	468.736	426.897	457.287	369.71	308.176	330.08
NM_001261843.2	568.035	516.085	557.208	472.758	492.689	453.298
NM_001265577.2	523.191	533.121	484.324	626.427	780.254	778.88
NM_001265589.2	7347.09	7361.47	6527.8	6977.48	6185.11	6183.37
NM_001267046.2	364.098	351.739	433.776	821.678	706.646	680.846
NM_001267594.2	767.702	737.55	762.929	684.279	661.499	685.343
NM_001268.4	539.207	616.295	600.703	665.297	652.666	588.208
NM_001270.4	1737.21	1716.61	1844.43	2286.96	2269.12	2164.86
NM_001270366.2	1393.4	1748.68	1452.97	2647.63	2512.52	2645.14
NM_001270377.2	380.114	409.862	400.861	335.36	287.565	371.452
NM_001270454.2	902.237	1019.14	1000.39	828.909	944.157	959.66
NM_001270520.2	1723.33	1666.5	1810.34	1569.23	1519.29	1557.76
NM_001270531.2	1226.83	1156.43	1172.02	1522.23	1488.86	1430.95
NM_001270616.2	103.57	133.28	124.608	707.782	524.095	518.054
NM_001270764.2	545.613	545.146	598.352	1229.35	1515.36	1402.16
NM_001270875.3	1409.41	1502.16	1295.45	1420.08	1335.76	1339.21
NM_001270941.2	923.591	983.066	859.323	1262.8	1091.37	1098.17
NM_001270960.2	1154.22	1425	1056.81	997.041	997.155	1017.22
NM_001270974.2	124.925	112.236	169.278	253.102	214.938	187.075
NM_001270975.2	2889.29	2827.94	2575.62	3494.62	3165.18	3109.23
NM_001271.4	1794.86	1974.15	1925.54	2499.38	2385.91	2423.88
NM_001271186.2	940.675	1031.17	1144.98	1030.49	1065.86	1083.78
NM_001271641.2	6433.11	6899.5	6847.55	5444.4	5482.39	5784.94
NM_001271696.3	523.191	490.03	491.378	585.75	562.372	628.681
NM_001271803.2	2142.95	2280.79	2155.95	1644.26	1865.74	2142.37
NM_001271838.2	404.672	371.781	389.105	465.527	396.507	473.084
NM_001271852.3	311.779	297.626	316.222	351.631	307.195	300.4
NM_001271874.2	920.388	926.948	969.824	809.022	875.455	858.028
NM_001271875.2	2772.91	2821.93	2826.01	2642.2	3223.09	3372.75
NM_001271938.2	3261.93	3084.48	3458.45	3801.95	3872.81	4374.68
NM_001271958.2	4052.06	4386.22	4045.05	3484.67	3812.94	3889.01
NM_001271977.2	4260.27	4371.19	4182.59	3909.52	4070.08	3975.35
NM_001272004.3	663.064	636.338	647.725	771.057	682.109	654.763
NM_001272013.2	1727.6	1724.63	1878.52	1400.2	1464.33	1454.33
NM_001272063.2	2596.73	373.786	992.16	1789.79	3267.25	1341.9
NM_001272071.2	2586.06	2861.01	2225.31	2915.19	2890.38	2782.74
NM_001273.5	5828.77	6289.22	6494.88	6940.42	7037.01	7012.62
NM_001276252.2	1574.91	1467.08	1405.95	1520.42	1399.55	1531.68
NM_001276270.2	626.761	511.074	552.506	722.245	712.534	715.023
NM_001276277.3	1042.11	1138.39	1308.38	1432.74	1388.75	1393.17
NM_001276380.2	569.103	518.089	605.406	769.249	679.165	620.586
NM_001277.3	1199.07	1256.64	1211.99	1176.02	1167.93	1106.26
NM_001277062.2	726.06	809.702	757.051	956.364	834.234	714.124
NM_001277074.2	644.912	722.519	645.374	493.549	623.222	655.663
NM_001277403.2	137.738	128.27	144.592	173.556	152.125	148.401
NM_001277406.2	28.8289	26.0548	16.4576	58.7558	46.1283	44.0706
NM_001278.5	406.807	474.998	510.186	726.764	705.664	720.419
NM_001278116.2	6154.43	5873.35	6819.33	6080.78	6347.05	6559.32
NM_001278356.2	888.356	822.729	902.818	1506.86	1099.23	1155.73
NM_001278509.3	383.317	342.72	356.19	319.089	226.715	272.518
NM_001278512.2	307.508	229.482	249.215	212.425	214.938	196.069
NM_001278556.2	4736.48	4493.45	3735.88	3564.22	3780.55	3642.57
NM_001278559.2	1694.5	1745.67	1525.86	1804.26	1717.54	1954.4
NM_001278624.2	144.144	145.305	153.996	143.726	109.923	116.023
NM_001278628.2	640.641	603.268	663.007	562.248	611.445	678.148
NM_001278639.2	3614.29	3835.06	2954.14	3308.4	3320.25	3021.08
NM_001278689.2	323.524	248.522	282.131	225.984	217.882	218.554
NM_001278716.2	386.52	404.851	390.281	337.168	326.824	357.961
NM_001281.3	4719.39	5124.77	4038	3096.88	3440.97	3321.48
NM_001281293.2	619.287	678.426	738.242	997.945	943.176	785.176
NM_001281453.2	4948.96	5239.01	4450.61	5137.07	5106.5	5437.77
NM_001281740.3	515.716	526.106	478.447	888.569	899.992	919.187
NM_001281775.3	1902.71	1776.73	1735.1	843.372	1125.73	1269.95
NM_001282112.2	308.576	351.739	325.626	305.53	457.357	389.44
NM_001282116.2	1187.32	1354.85	1346	1702.11	1727.36	1662.99
NM_001282129.2	342.743	428.902	413.792	579.423	441.653	434.41
NM_001282195.2	219.954	253.533	221.002	301.011	246.344	268.021
NM_001282359.2	454.855	462.973	494.904	325.417	343.508	268.021
NM_001282531.3	4122.53	3859.11	4240.19	4585.67	4046.53	4113.86
NM_001282547.2	2798.54	2683.64	2719.03	3774.84	3097.46	3762.19
NM_001282597.3	221.021	202.425	211.598	328.129	255.178	240.14
NM_001282659.2	1691.29	1643.45	1740.98	2769.66	2565.52	2417.59
NM_001282680.3	680.148	644.354	652.427	1204.04	1070.76	968.654
NM_001282684.2	952.42	1122.36	1054.46	737.611	811.661	909.293
NM_001282805.2	1297.3	1519.19	1618.73	1797.93	1630.19	1618.92
NM_001282857.2	350.217	350.737	347.961	564.056	481.893	493.771
NM_001282860.2	1467.07	1335.81	1303.68	1344.15	1462.36	1415.66
NM_001282874.2	1764.97	1869.93	2160.65	2372.83	2395.72	2235.91
NM_001283.5	1519.39	1863.92	1615.2	1025.97	1178.72	1186.31
NM_001283009.2	537.071	452.952	477.271	516.147	485.819	540.539
NM_001283041.3	529.597	544.144	580.719	715.013	651.684	653.864
NM_001284.4	1212.95	1463.08	1337.77	1189.58	1115.91	1112.56
NM_001284236.3	528.529	561.18	659.481	992.521	853.863	795.969
NM_001284240.2	641.709	596.253	713.556	1373.98	1327.9	1113.46
NM_001284254.2	2400.27	2239.71	1913.79	2027.53	2360.39	2352.83
NM_001284259.2	302.169	395.832	459.638	604.733	651.684	572.918
NM_001284401.2	284.018	335.706	303.291	221.464	234.567	251.832
NM_001286.5	825.36	881.854	818.179	3050.78	2529.2	2420.29
NM_001286045.2	475.142	424.893	513.713	1035.91	729.219	730.313
NM_001286069.2	348.082	363.765	339.732	347.111	344.49	326.482
NM_001286077.2	1807.68	1911.02	1751.56	1546.63	1684.17	1612.62
NM_001286086.2	754.889	1010.12	842.866	577.615	731.182	804.064
NM_001286134.2	2356.49	2370.98	2662.61	2440.63	2608.7	2628.95
NM_001286176.2	820.021	825.736	947.489	965.403	930.417	857.128
NM_001286398.3	665.199	746.569	766.455	2080.86	1347.53	1371.58
NM_001286445.3	968.436	944.986	1080.33	1197.71	1292.57	1225.88
NM_001286577.2	585.119	497.045	530.171	791.848	749.829	689.84
NM_001286581.2	1487.36	1338.81	1173.19	1736.46	1867.7	1998.47
NM_001286611.2	1130.73	995.092	1120.29	1028.68	991.267	989.34
NM_001286635.2	1919.79	1857.91	1850.31	1475.22	1570.32	1594.64
NM_001286657.2	455.923	478.005	486.675	509.82	418.099	384.943
NM_001287.6	809.344	848.784	845.217	946.421	979.489	1062.19
NM_001287135.2	950.285	995.092	1053.29	1605.39	1370.11	1283.44
NM_001287491.2	1699.84	1491.13	1803.29	3502.75	3185.79	3089.44
NM_001287492.4	559.494	597.255	632.443	211.521	257.14	243.737
NM_001288565.2	1999.87	2335.91	2160.65	1447.2	1557.56	1584.74
NM_001288655.2	1893.1	1891.98	1923.19	1260.99	1139.47	1173.72
NM_001288732.2	502.904	376.792	470.218	800.887	625.185	616.089
NM_001288962.2	366.233	376.792	417.318	343.496	386.692	390.34
NM_001288973.2	1236.44	1091.29	1202.58	1881.99	1696.93	1657.59
NM_001288980.2	564.832	614.291	841.69	589.366	592.797	540.539
NM_001288985.2	333.134	282.594	343.259	336.264	280.695	307.595
NM_001289104.2	4314.72	4619.71	4140.27	3314.73	3429.19	3885.41
NM_001289125.3	269.069	245.516	262.146	273.893	286.584	257.228
NM_001289187.2	589.39	607.276	521.942	248.582	352.341	329.18
NM_001289971.2	1286.62	1243.61	1239.02	602.925	787.125	723.118
NM_001290.5	426.027	630.325	511.362	611.061	635	644.87
NM_001290047.2	640.641	572.203	701.8	997.945	863.678	945.269
NM_001290117.2	322.456	294.619	312.695	229.6	282.658	295.003
NM_001290223.2	1817.29	1605.37	2040.75	2464.13	2290.71	2306.96
NM_001290264.2	3885.49	3846.08	4046.22	3298.46	3455.69	3471.68
NM_001290321.3	637.438	505.062	586.597	867.778	659.536	688.041
NM_001291303.3	401.469	400.843	417.318	738.515	602.612	562.125
NM_001291415.2	354.488	377.794	351.488	623.716	542.743	620.586
NM_001291694.2	1779.92	1579.32	1712.77	2364.7	2437.93	2226.01
NM_001291867.2	406.807	594.249	509.011	532.418	501.522	427.215
NM_001291941.3	485.82	530.114	498.431	386.884	331.731	325.583
NM_001291978.2	881.95	915.925	913.398	1298.05	1276.87	1255.56
NM_001291999.2	321.388	320.674	390.281	416.714	360.193	376.849
NM_001292034.3	1476.68	1387.92	1450.62	3858	3298.66	2995.9
NM_001293.3	2534.8	2480.21	2326.4	2278.82	2143.49	2167.55
NM_001293298.2	192.192	183.385	255.093	215.137	247.326	248.234
NM_001294.4	1991.33	1981.16	2114.8	2550	2512.52	2620.85
NM_001294338.2	1067.74	968.035	834.637	545.977	585.927	602.598
NM_001297551.2	592.593	698.468	691.22	371.518	415.154	370.553
NM_001297568.2	154.822	199.419	192.789	232.311	210.031	222.152
NM_001297595.2	1419.02	1183.49	1283.69	1502.34	1279.81	1339.21
NM_001297599.2	806.141	828.742	854.621	1271.84	1001.08	1001.03
NM_001297654.2	15188.5	15527.6	16267.2	13945	15403.9	15973.3
NM_001297671.3	1023.96	874.839	935.734	1089.24	1313.18	1304.13
NM_001297719.2	222.089	143.301	209.247	427.562	316.028	255.43
NM_001297732.2	486.888	493.036	405.563	395.924	366.082	339.074
NM_001297776.2	1775.64	1700.57	1786.83	770.153	880.363	981.245
NM_001300.6	1557.83	1585.33	1690.43	3041.74	2143.49	2107.29
NM_001300759.2	449.517	421.887	429.074	143.726	170.773	167.288
NM_001300791.2	367.301	309.651	364.419	478.182	398.47	471.286
NM_001300816.3	304.305	321.676	349.137	462.815	431.839	420.02
NM_001300826.2	440.975	415.874	378.525	459.199	336.638	404.73
NM_001300829.2	5833.04	6302.25	5339.32	1797.93	2236.73	2461.66
NM_001300860.2	1303.71	1470.09	1544.67	1986.85	1936.41	1902.23
NM_001300862.2	624.625	621.306	566.613	377.845	381.785	466.789
NM_001300905.2	1647.52	1283.7	1449.45	2663.9	2448.72	2555.2
NM_001301043.2	2483.55	2401.05	2592.08	2439.72	2274.02	2242.2
NM_001301073.2	1139.27	1096.3	1043.88	1300.76	1247.43	1184.51
NM_001301833.4	579.781	552.161	570.139	708.686	683.091	657.461
NM_001302084.2	226.36	277.583	288.008	195.25	251.252	237.442
NM_001302769.2	523.191	532.118	546.628	766.537	634.018	612.491
NM_001303.4	310.711	334.704	385.579	312.762	303.269	355.263
NM_001303007.2	3623.9	4364.17	4073.26	2543.67	2908.04	3012.09
NM_001303037.2	461.262	418.88	460.814	705.07	638.925	649.367
NM_001303143.2	384.385	408.859	410.265	463.719	452.449	418.221
NM_001303256.3	839.24	773.626	879.307	1085.63	987.341	957.861
NM_001303264.2	1221.49	1322.78	1440.04	2862.76	1768.58	1933.71
NM_001303426.2	556.29	652.371	587.772	681.567	711.553	617.888
NM_001303457.2	1125.39	1033.17	1154.38	900.32	961.823	919.187
NM_001303512.2	4796.27	5033.58	4590.5	3549.76	3546.97	3856.63
NM_001304.5	4514.39	4443.34	4866.75	4122.85	4281.09	4045.5
NM_001304274.2	106.774	106.223	91.6925	77.7385	110.904	82.7448
NM_001304504.2	1330.4	1441.03	1365.98	1015.12	1190.5	1225.88
NM_001304533.3	1009.01	990.081	1133.23	1603.58	1270	1197.1
NM_001304808.3	1716.92	1762.71	1659.87	1918.15	1915.79	1960.69
NM_001305203.2	1144.61	983.066	1032.13	515.243	511.337	516.256
NM_001306089.2	497.565	448.944	404.387	601.117	444.598	485.676
NM_001306144.3	616.084	568.194	663.007	682.471	711.553	682.645
NM_001306158.2	333.134	281.592	363.243	230.504	194.328	198.767
NM_001306215.2	2288.16	1863.92	2121.86	3999.01	2548.83	2655.93
NM_001308027.2	607.542	664.397	594.826	542.361	407.303	483.877
NM_001308068.2	731.399	927.951	778.211	688.799	707.627	738.407
NM_001308120.2	355.556	343.722	367.945	372.421	390.618	369.653
NM_001308142.2	565.9	567.192	619.512	837.948	911.769	858.028
NM_001308147.2	1051.72	901.896	1045.06	638.179	726.275	720.419
NM_001308195.2	511.445	386.813	407.914	562.248	482.874	495.569
NM_001308319.2	1136.07	1125.37	1347.17	1426.41	1274.91	1305.93
NM_001312.4	3739.21	3823.04	3447.87	3630.21	3905.2	4073.38
NM_001312653.2	338.472	313.659	279.78	266.661	305.232	310.293
NM_001312673.2	1490.56	1487.13	1522.33	1263.7	1428.99	1357.19
NM_001313998.2	923.591	1038.18	978.053	811.734	829.327	759.094
NM_001314025.2	257.324	280.59	263.322	239.543	201.198	252.731
NM_001316.4	4002.94	3634.64	4088.54	4960.8	4639.32	4444.83
NM_001316979.2	710.044	682.434	659.481	427.562	521.151	567.521
NM_001317162.2	4849.66	4460.38	4929.06	5177.74	5357.75	5252.5
NM_001317782.2	28446.6	33010.4	32614.3	17611.4	20937.3	22475.1
NM_001317785.2	216.75	230.484	190.438	154.573	113.848	157.395
NM_001317950.2	519.987	491.032	514.889	310.954	446.561	455.096
NM_001318042.2	2241.18	2001.21	1866.76	2634.97	2486.02	2536.31
NM_001318252.2	4249.59	4993.5	4535.25	1820.53	1998.24	2167.55
NM_001318510.2	432.433	480.009	545.453	2399.05	1464.33	1526.28
NM_001318734.2	1026.09	1073.26	902.818	1129.02	1286.68	1311.33
NM_001318852.2	2203.81	2413.07	2295.84	2244.47	2298.56	2505.73
NM_001318891.2	224.225	198.417	224.529	146.438	169.791	164.59
NM_001318895.3	594.729	515.083	507.835	560.44	400.432	401.132
NM_001318939.2	156.957	123.259	135.188	119.32	97.1638	121.419
NM_001319.7	3922.86	3721.82	3702.97	4867.69	5041.72	5214.72
NM_001319206.4	651.319	547.15	576.017	915.687	694.868	738.407
NM_001319236.2	10120	11934.1	8380.46	8119.15	8039.07	8154.86
NM_001319674.2	341.675	302.636	279.78	401.347	395.525	473.984
NM_001319944.2	719.654	755.588	755.875	609.253	731.182	596.302
NM_001319999.2	1552.49	1562.28	1441.22	1894.65	2045.35	1959.79
NM_001320.7	2946.95	2872.04	2643.8	2879.94	2876.64	2678.41
NM_001320047.2	260.528	287.605	298.588	353.439	326.824	356.162
NM_001320214.2	5551.16	6221.08	5458.05	2860.05	3268.24	3304.4
NM_001320643.3	865.934	910.915	851.094	1230.26	1375.01	1441.74
NM_001320646.2	1398.73	700.472	2769.58	1725.61	1009.91	724.017
NM_001320669.3	461.262	482.013	402.036	152.765	175.68	193.371
NM_001320714.2	655.59	589.239	587.772	714.109	584.946	594.503
NM_001320835.1	168.702	169.356	195.14	344.399	227.697	227.548
NM_001320848.2	292.56	300.632	280.955	184.403	211.994	179.88
NM_001320925.4	938.54	1079.27	798.195	649.93	926.491	868.82
NM_001320973.2	433.501	338.712	331.504	401.347	349.397	315.689
NM_001321.3	6602.88	7271.28	6016.44	4913.79	5570.72	5661.72
NM_001321075.3	974.843	992.085	849.919	839.756	769.459	916.489
NM_001321092.3	2951.22	2942.18	2820.13	2574.41	2717.64	2700
NM_001321103.2	1196.93	930.957	1251.96	2222.78	1357.35	1531.68
NM_001321154.2	413.214	356.75	439.654	391.404	361.174	367.855
NM_001321209.2	638.506	805.694	679.465	599.309	601.63	510.859
NM_001321324.2	733.534	763.605	797.019	466.431	475.023	545.936
NM_001321571.2	2018.02	1991.19	2220.6	2085.38	1937.39	1945.4
NM_001321759.2	319.253	262.552	324.45	293.779	313.083	309.394
NM_001321967.2	1329.33	1334.81	1358.93	1395.68	1359.31	1345.5
NM_001322101.2	1370.97	1445.04	1317.79	1662.34	1760.73	1666.59
NM_001322131.2	776.244	865.82	797.019	236.831	250.27	266.222
NM_001322374.2	1588.79	1663.5	1162.61	1309.8	1128.67	1241.17
NM_001322917.1	147.348	110.232	173.981	169.036	136.422	155.596
NM_001322934.2	276.544	228.48	318.573	319.993	268.918	306.695
NM_001323043.2	599	654.375	586.597	772.865	761.607	718.621
NM_001323329.2	717.518	691.453	712.38	1113.65	900.973	921.885
NM_001323342.2	1224.69	1347.83	1260.18	2338.48	1946.22	1895.04
NM_001323682.2	1631.5	1668.51	1537.61	1186.87	1247.43	1394.97
NM_001324.3	746.347	728.531	761.753	467.335	519.188	453.298
NM_001324242.2	334.201	276.581	273.902	356.151	343.508	311.192
NM_001324445.2	908.643	784.649	827.583	652.642	683.091	658.361
NM_001325.3	516.784	532.118	584.246	461.007	501.522	552.232
NM_001326.3	807.208	847.782	901.643	1005.18	942.194	957.861
NM_001326342.2	2943.75	3045.4	3010.57	3359.02	3446.86	3392.54
NM_001329214.4	185.786	160.337	172.805	165.42	178.624	158.294
NM_001329630.2	250.918	228.48	222.178	564.96	587.89	564.823
NM_001329686.2	774.108	780.641	739.418	375.133	399.451	422.718
NM_001329752.2	1704.11	1811.81	1490.59	1308.9	1252.33	1215.99
NM_001329943.3	338.472	393.828	478.447	519.763	482.874	502.765
NM_001329984.2	2628.77	2479.21	2828.36	4166.24	3722.65	3818.85
NM_001330059.2	1123.26	1292.72	1291.92	2112.5	1730.3	1836.57
NM_001330063.2	1720.12	1541.24	1886.75	1947.08	1927.57	1907.63
NM_001330071.2	408.943	441.929	485.5	550.497	425.95	464.09
NM_001330074.2	689.757	662.392	726.487	795.463	697.813	760.892
NM_001330078.2	276.544	248.522	264.498	434.793	294.436	310.293
NM_001330103.2	562.697	490.03	534.873	357.959	368.045	342.671
NM_001330112.2	836.037	790.662	702.976	742.131	685.054	652.065
NM_001330145.2	482.617	450.948	427.898	648.122	578.075	498.268
NM_001330177.2	1551.42	1616.4	1689.26	1698.5	1522.23	1535.28
NM_001330195.2	165.499	235.495	236.284	239.543	338.601	300.4
NM_001330218.2	904.372	874.839	872.254	689.703	713.516	723.118
NM_001330239.4	1253.52	1319.77	1267.24	2054.65	1920.7	1755.63
NM_001330288.2	2145.08	2319.88	2349.91	2611.47	2593.98	2705.39
NM_001330301.2	878.747	712.498	788.79	976.251	1076.65	914.69
NM_001330311.2	1076.28	933.963	992.16	1164.27	1172.84	1285.24
NM_001330360.2	671.606	751.58	741.769	924.726	926.491	821.152
NM_001330442.2	863.798	856.801	874.605	922.014	990.285	1098.17
NM_001330564.2	1479.88	1616.4	1735.1	1585.5	1675.34	1600.03
NM_001330574.2	657.725	638.342	657.129	1116.36	957.897	1068.49
NM_001330588.2	714.315	694.46	699.449	852.411	865.641	706.928
NM_001330640.2	608.609	536.127	637.145	666.201	662.48	653.864
NM_001330668.2	332.066	307.647	362.068	272.989	331.731	332.778
NM_001330672.2	3610.01	3774.93	3412.61	5233.79	5264.51	4880.14
NM_001330691.3	1109.38	1110.33	1177.9	1324.27	1097.26	1256.46
NM_001330700.2	3842.78	3480.32	4082.67	6358.28	5937.79	5712.09
NM_001330701.2	1286.62	1278.69	1296.63	1684.03	1481.01	1349.1
NM_001330707.2	723.925	679.428	624.214	552.305	550.595	551.332
NM_001330723.2	1439.31	1456.06	1476.48	1564.71	1483.96	1492.1
NM_001330736.2	1613.35	1605.37	1757.44	878.625	758.663	825.649
NM_001330988.2	782.65	950.999	867.552	1855.78	1697.91	1749.33
NM_001331036.3	576.577	567.192	517.24	602.021	517.225	500.966
NM_001332.4	2059.66	1952.1	2065.43	2942.31	2849.16	2725.18
NM_001333.4	227.428	267.562	309.168	223.272	256.159	190.673
NM_001334.3	356.624	365.769	324.45	226.888	224.753	208.661
NM_001336.4	503.971	539.133	484.324	488.125	521.151	506.362
NM_001338.5	1660.33	1768.72	1780.95	2186.62	1895.18	1877.95
NM_001343.4	249.85	326.687	296.237	188.923	264.011	182.578
NM_001344.4	3263	3316.97	2753.13	2738.93	2751.01	2440.97
NM_001346231.2	640.641	503.057	634.794	556.824	517.225	529.747
NM_001346249.2	498.633	493.036	559.559	752.074	664.443	566.622
NM_001346311.2	1532.2	1548.25	1561.12	1227.54	1367.16	1283.44
NM_001346516.2	666.267	678.426	590.123	961.788	855.826	828.347
NM_001346754.2	720.722	768.616	742.944	496.261	587.89	472.185
NM_001347217.2	1333.6	1398.94	1411.83	1165.17	1272.94	1210.59
NM_001347702.2	198.599	209.44	188.087	179.883	146.236	180.779
NM_001347721.2	1472.41	1548.25	1614.02	2099.84	2097.36	1895.94
NM_001348.3	1839.71	2055.32	1866.76	2612.37	2228.88	2386.11
NM_001348022.3	300.034	367.773	351.488	197.058	195.309	219.454
NM_001348323.3	3101.77	3195.72	3101.09	3933.02	3692.22	3575.11
NM_001348716.2	1482.02	1315.77	1374.21	9439.8	6214.56	6950.56
NM_001348719.2	200.734	216.455	183.385	98.529	146.236	155.596
NM_001348768.2	128.128	184.388	168.103	247.678	229.66	255.43
NM_001348800.3	25.6257	28.059	25.862	229.6	135.44	143.904
NM_001348957.2	360.895	355.748	273.902	272.989	311.12	312.991
NM_001349.4	1306.91	1183.49	1323.66	1353.19	1391.7	1353.6
NM_001349206.2	531.732	548.152	607.757	801.791	872.511	815.756
NM_001349232.2	403.604	408.859	407.914	331.744	320.935	305.796
NM_001349278.2	754.889	868.826	781.737	865.97	827.364	760.892
NM_001349338.3	377.978	406.855	360.892	630.043	596.723	652.065
NM_001349723.3	577.645	579.217	593.65	411.291	558.446	564.823
NM_001349798.2	429.23	410.864	457.287	442.025	434.783	417.322
NM_001349884.2	278.679	288.607	283.306	255.814	292.473	256.329
NM_001350134.2	258.392	234.493	283.306	504.396	352.341	384.044
NM_001350197.2	392.927	397.836	396.159	560.44	552.558	522.551
NM_001350599.2	474.075	417.878	490.202	625.523	525.077	508.161
NM_001350605.2	2976.85	3479.31	3597.17	3930.31	3438.03	3429.41
NM_001350770.2	455.923	381.803	424.372	524.283	463.245	413.724
NM_001350814.2	2210.21	2070.35	2246.47	3181.85	2830.51	2852
NM_001351015.2	433.501	435.916	427.898	215.137	203.161	205.963
NM_001351132.2	556.29	586.232	570.139	419.426	478.949	469.487
NM_001351169.2	1953.96	1910.01	1957.28	1580.08	1569.34	1421.95
NM_001351264.2	689.757	554.165	587.772	571.287	636.962	549.533
NM_001351365.2	2137.61	1662.49	2038.39	2522.88	2342.73	2132.48
NM_001351411.2	1590.93	1524.2	1645.76	1486.97	1675.34	1681.88
NM_001351601.3	265.866	206.434	192.789	357.959	329.768	313.891
NM_001351695.2	474.075	459.967	466.691	404.963	396.507	419.12
NM_001351774.2	1139.27	1099.31	921.627	540.554	554.52	681.745
NM_001352027.3	942.811	974.047	948.665	1080.2	1022.67	1029.81
NM_001352389.2	545.613	548.152	481.973	479.99	501.522	534.244
NM_001352514.2	844.579	870.83	867.552	808.118	758.663	715.922
NM_001352688.2	1079.48	1156.43	978.053	720.437	801.846	866.122
NM_001352754.2	466.601	482.013	469.042	530.61	519.188	527.048
NM_001353214.3	593.661	503.057	534.873	723.149	626.166	627.781
NM_001353345.2	862.731	848.784	974.527	1379.41	1463.35	1623.42
NM_001353694.2	556.29	517.087	594.826	988.002	1059.97	992.938
NM_001353788.2	1317.59	1201.53	1324.84	1612.62	1455.49	1593.74
NM_001353812.2	240.241	222.468	265.673	417.618	357.249	315.689
NM_001353921.2	1093.36	1016.14	1077.97	799.983	841.105	801.365
NM_001354046.2	1281.28	1142.4	1243.73	1634.32	1619.4	1533.48
NM_001354587.1	215.683	190.4	209.247	188.923	202.179	182.578
NM_001354689.3	2605.28	2559.38	2602.66	3626.59	3542.06	3478.88
NM_001354761.2	5876.82	5946.5	5664.95	5485.99	5613.91	5730.98
NM_001354909.2	1593.06	1358.86	1739.81	1829.57	1760.73	1861.76
NM_001354930.2	842.444	747.571	782.913	984.386	948.083	928.181
NM_001355197.2	112.112	70.1474	82.2881	79.5463	111.886	97.1352
NM_001355204.2	115.315	103.217	117.554	98.529	93.238	121.419
NM_001355237.2	226.36	276.581	229.231	340.784	355.286	288.707
NM_001355283.3	139.873	142.299	130.485	227.792	242.419	223.051
NM_001355404.2	205.005	200.421	139.89	151.861	156.051	165.49
NM_001355407.2	266.934	264.556	377.35	448.352	511.337	438.907
NM_001356.5	7435.71	7618.01	7840.88	10717.1	10211	9936.57
NM_001357.5	3658.06	4225.88	4190.82	5605.3	5407.8	5376.61
NM_001358.3	2607.41	2797.88	3019.97	4695.95	4019.05	4194.8
NM_001358291.2	702.57	684.439	822.881	330.84	400.432	393.937
NM_001358451.3	197.531	192.404	172.805	155.477	189.42	167.288
NM_001358921.2	349.15	332.699	357.366	319.993	304.25	314.79
NM_001359.2	1467.07	1551.26	1578.76	1129.02	1180.69	1197.1
NM_001359084.1	1887.76	2132.48	1903.21	2681.98	2099.33	2094.7
NM_001360.3	2776.11	2950.2	3170.44	6584.27	6060.47	5983.71
NM_001360016.2	1710.51	1871.93	1732.75	1789.79	1915.79	1934.61
NM_001360452.2	1589.86	1542.24	1470.61	1485.17	1413.29	1402.16
NM_001361041.2	102.503	80.1685	110.501	71.4109	53.9799	62.958
NM_001361665.2	511.445	621.306	737.067	1371.27	798.902	756.395
NM_001363.5	2010.55	1978.16	1771.55	1825.95	1958	1863.56
NM_001363059.2	658.793	626.316	610.108	577.615	717.442	689.84
NM_001363118.2	1065.6	1225.58	1335.42	884.049	932.38	1046
NM_001363540.2	198.599	164.345	222.178	319.089	317.991	285.11
NM_001363541.2	7532.88	8518.91	7657.5	7515.32	8199.05	8666.62
NM_001363644.2	549.884	528.11	550.155	551.401	570.224	588.208
NM_001363705.2	392.927	368.775	346.786	409.483	398.47	362.458
NM_001363758.2	1489.49	1685.54	1381.27	945.517	921.584	1030.71
NM_001363818.2	1295.16	1358.86	1362.46	1307.99	1116.89	1193.5
NM_001363845.2	844.579	791.664	775.859	786.424	742.959	796.868
NM_001363941.2	525.326	478.005	507.835	648.122	592.797	535.143
NM_001364013.2	1105.11	1050.21	1228.44	597.501	600.649	543.238
NM_001364564.1	3324.93	3195.72	3422.01	1090.15	1786.24	1821.28
NM_001364614.2	675.877	665.399	648.901	673.432	625.185	532.445
NM_001364716.4	3147.69	3054.42	3125.77	4548.6	4379.24	4138.14
NM_001364730.1	82.2157	66.139	89.3414	169.94	163.903	172.685
NM_001364857.2	679.08	745.567	733.54	802.695	827.364	821.152
NM_001364905.1	610.745	591.243	666.534	884.953	831.29	738.407
NM_001364929.1	1966.77	1845.88	1967.86	2521.98	2468.35	2396.9
NM_001365088.1	288.289	253.533	268.024	292.875	339.582	309.394
NM_001365225.1	1036.77	1086.28	1020.37	872.298	975.563	956.062
NM_001365324.3	233.834	280.59	291.535	353.439	320.935	300.4
NM_001365479.2	684.419	695.462	686.518	647.218	616.352	698.834
NM_001365480.1	2172.84	1978.16	2127.74	2981.18	2633.24	2630.74
NM_001365536.1	319.253	256.539	344.435	368.806	324.861	317.488
NM_001365588.1	361.962	373.786	396.159	502.588	541.762	537.841
NM_001365613.2	975.911	1046.2	1041.53	715.917	775.347	786.076
NM_001365621.2	2621.29	2616.5	2408.69	2702.77	2623.42	2704.5
NM_001365631.1	1523.66	1494.14	1471.78	1857.59	1742.08	1605.43
NM_001365635.2	1208.68	1082.27	1247.25	1321.55	1347.53	1416.55
NM_001365715.1	1519.39	1425	1275.47	2454.19	2301.51	2203.53
NM_001365792.1	944.946	1068.25	1141.45	999.753	1299.44	1172.82
NM_001365896.1	8895.31	8923.76	8328.73	7641.87	7645.51	7633.21
NM_001365919.1	2590.33	2604.47	2620.29	3685.35	3556.78	3790.97
NM_001365951.3	5079.22	4654.78	5351.08	7043.47	6896.66	6666.35
NM_001365999.1	737.805	646.359	592.475	848.796	883.307	827.448
NM_001366006.2	7023.57	7160.05	7969.02	8262.88	9154.99	8637.84
NM_001366057.1	1025.03	920.936	1086.2	1685.84	1449.6	1507.39
NM_001366145.2	206.073	161.339	231.582	450.16	425.95	392.138
NM_001366178.1	997.265	861.811	906.345	815.35	961.823	940.772
NM_001366207.1	692.961	638.342	767.631	935.573	864.659	894.903
NM_001366230.1	411.078	461.971	445.531	477.278	473.06	472.185
NM_001366244.2	815.75	847.782	762.929	1253.76	1308.28	1337.41
NM_001366245.2	324.592	247.52	270.375	311.858	317.991	298.601
NM_001366282.2	1640.04	1520.2	1678.68	1706.63	1693.01	1711.56
NM_001366293.2	2909.58	3119.56	2077.19	2208.31	2485.04	2548.9
NM_001366299.1	9021.3	9498.97	8878.89	10405.2	10515.3	11588.8
NM_001366306.2	273.34	289.609	342.084	389.596	354.304	359.76
NM_001366318.2	909.711	871.833	869.903	1502.34	1269.02	1239.37
NM_001366335.1	1839.71	1952.1	1744.51	1945.27	1641.97	1656.69
NM_001366418.1	773.041	702.477	764.104	552.305	730.2	633.178
NM_001366432.2	1555.69	1402.95	1608.15	2433.39	2206.3	2215.22
NM_001366446.1	266.934	252.531	233.933	251.294	213.957	226.649
NM_001366458.2	402.536	462.973	450.234	500.78	570.224	534.244
NM_001366481.3	5255.4	5013.54	4390.66	5032.21	5105.51	4927.81
NM_001366508.1	1109.38	1253.64	1174.37	1339.63	1390.72	1236.67
NM_001366521.1	836.037	761.601	1038.01	950.036	943.176	896.702
NM_001366661.1	1222.56	1369.88	1283.69	1281.78	1387.77	1492.1
NM_001366673.1	1590.93	1418.98	1748.03	2060.07	1983.51	1845.57
NM_001366683.2	191.125	223.47	196.316	229.6	319.953	287.808
NM_001366686.3	493.294	462.973	450.234	867.778	757.681	777.981
NM_001366722.1	105.706	96.2022	76.4104	188.923	170.773	132.212
NM_001366735.2	666.267	633.331	866.376	1014.22	892.14	861.625
NM_001366845.3	1386.99	1452.05	1492.94	1772.62	1685.15	1706.16
NM_001366854.1	579.781	467.984	507.835	468.239	662.48	590.906
NM_001367479.1	128.128	106.223	97.5702	141.918	92.2565	70.1532
NM_001367534.1	545.613	507.066	492.553	530.61	549.613	514.457
NM_001367549.1	1562.1	1450.05	1735.1	3174.62	2514.48	2498.53
NM_001367561.1	1063.46	1106.33	1284.87	1517.71	1491.81	1313.12
NM_001367710.1	1090.16	1113.34	1194.35	2068.2	1595.84	1718.75
NM_001367721.1	1127.53	1126.37	1283.69	1600.87	1590.93	1525.38
NM_001367773.1	1158.49	1250.63	1119.12	1438.16	1342.63	1536.18
NM_001367774.2	298.966	263.554	272.726	316.377	336.638	306.695
NM_001367799.1	735.67	737.55	864.025	885.857	910.788	1022.62
NM_001367805.3	814.682	793.668	867.552	1243.82	1305.33	1295.14
NM_001367806.1	545.613	487.024	500.782	736.708	594.76	638.574
NM_001367823.1	1026.09	1095.3	1061.52	1198.62	1217.98	1351.8
NM_001367834.3	266.934	218.459	289.184	503.492	525.077	543.238
NM_001367871.1	1537.54	1522.2	1316.61	1712.96	1475.12	1768.22
NM_001367909.1	401.469	329.693	564.261	169.036	212.975	223.951
NM_001367916.1	2209.15	2401.05	2606.18	2037.47	1944.26	1909.43
NM_001367949.2	1483.09	1461.07	1887.92	2886.27	2491.91	2306.06
NM_001368238.1	321.388	370.779	353.839	374.229	359.212	357.062
NM_001368809.2	1399.8	1458.06	1475.31	1350.48	1531.07	1526.28
NM_001368882.1	324.592	433.912	397.334	207.001	331.731	351.665
NM_001369387.1	118.519	185.39	111.677	244.063	185.494	158.294
NM_001369441.2	627.829	600.262	604.23	507.108	528.021	573.817
NM_001369450.1	494.362	478.005	466.691	442.928	509.374	537.841
NM_001369598.1	341.675	394.83	379.701	592.078	533.91	525.25
NM_001369623.2	974.843	952.001	1042.71	1255.57	1143.39	1149.43
NM_001369783.1	461.262	421.887	447.883	354.343	288.547	368.754
NM_001369789.1	1758.56	1840.87	1824.45	1657.82	1664.54	1845.57
NM_001369817.2	597.932	586.232	705.327	713.205	527.04	579.214
NM_001370062.2	906.508	862.814	805.248	1035.01	989.304	1088.27
NM_001370100.5	1810.88	1668.51	1847.96	2442.43	2265.19	2106.39
NM_001370150.2	1249.25	1177.48	1184.95	1175.12	1121.8	1124.25
NM_001370181.1	689.757	620.304	674.763	787.328	793.013	794.17
NM_001370259.2	1327.2	1192.51	1226.09	1027.77	1076.65	1112.56
NM_001370285.1	33.0998	30.0632	38.793	20.7905	18.6476	16.1892
NM_001370298.3	382.249	394.83	559.559	131.071	184.513	199.667
NM_001370300.1	373.708	517.087	405.563	334.456	386.692	381.346
NM_001370302.1	1192.66	1112.34	1170.84	1875.67	1680.25	1742.14
NM_001370348.2	1137.14	1008.12	1161.44	996.137	1134.56	1112.56
NM_001370472.1	1926.2	1990.18	1977.27	2572.6	2404.56	2286.27
NM_001370476.2	286.153	247.52	297.413	226.888	280.695	248.234
NM_001370595.2	641.709	665.399	550.155	621.908	676.221	534.244
NM_001370597.1	920.388	652.371	740.593	790.944	740.015	749.2
NM_001370658.1	203.938	228.48	243.338	188.019	215.919	230.246
NM_001371072.1	2511.31	2533.32	2635.57	2870	2709.79	2752.16
NM_001371189.2	1235.37	1102.32	1277.82	1545.73	1457.46	1466.92
NM_001371333.1	2482.49	2778.84	2308.77	2463.22	2345.67	2297.07
NM_001371340.3	213.547	182.383	210.422	493.549	71.646	1.7988
NM_001371445.1	1514.05	1458.06	1495.29	1786.18	1682.21	1712.46
NM_001371533.1	563.765	618.3	643.023	764.73	785.162	778.88
NM_001371589.1	3413.55	3317.97	3116.37	3773.93	3670.63	3890.8
NM_001371596.2	328.863	400.843	360.892	262.141	279.714	198.767
NM_001371623.1	1428.63	1534.22	1525.86	1808.78	1698.89	1823.08
NM_001371910.2	728.196	827.74	859.323	3001.07	2243.6	2143.27
NM_001371928.1	1322.92	1286.7	1079.15	1242.01	1507.51	1657.59
NM_001372043.1	158.025	108.227	144.592	241.351	208.068	200.566
NM_001372052.1	5779.65	5828.25	6251.55	6360.09	6005.51	6082.64
NM_001372078.1	689.757	572.203	727.662	1110.03	1291.59	1136.84
NM_001372080.1	1010.08	955.007	889.887	1032.29	904.899	874.217
NM_001372327.1	1246.05	1253.64	1201.41	773.769	876.437	803.164
NM_001372574.1	515.716	442.931	479.622	1153.42	933.361	892.205
NM_001374258.1	600.068	493.036	572.49	943.709	741.978	768.987
NM_001374353.1	1536.47	1374.89	1515.28	1900.07	2108.16	2099.2
NM_001374736.1	2178.18	2015.24	2210.02	3890.54	3571.5	3316.09
NM_001374828.1	1132.87	1140.4	1283.69	1939.85	1995.29	1929.21
NM_001375405.1	619.287	669.407	695.922	536.034	615.371	568.421
NM_001375462.1	2101.3	2022.25	2187.69	2712.71	2331.93	2357.33
NM_001375505.1	11327.6	11252.7	12650	15592.9	12336.9	12722
NM_001375524.1	1358.16	1328.79	1422.41	3039.94	2750.03	2664.92
NM_001375567.1	867.001	869.828	1020.37	1097.38	1175.78	1049.6
NM_001375584.1	2016.95	1731.64	1825.62	2738.02	2584.16	2470.65
NM_001375635.1	1173.44	1279.69	1309.56	854.219	818.531	877.814
NM_001375670.1	5736.94	5879.36	6068.16	6791.27	6346.07	6098.83
NM_001375765.1	1317.59	1364.87	1154.38	948.229	1122.78	1304.13
NM_001375808.2	1380.58	1417.98	1503.52	800.887	1065.86	1000.13
NM_001375883.1	1269.54	1278.69	1300.15	1930.81	1860.83	1912.12
NM_001375905.1	214.615	105.221	177.507	626.427	273.825	323.784
NM_001375912.1	4395.87	4022.46	4378.9	4780.01	5152.62	5177.85
NM_001376.5	3975.18	4009.43	4208.45	6875.33	6338.22	6190.57
NM_001376000.2	1270.61	1231.59	1154.38	925.63	990.285	831.046
NM_001376013.1	2352.22	2292.82	2215.9	2636.78	2382.97	2342.04
NM_001376049.1	415.349	367.773	469.042	292.875	315.046	346.269
NM_001376113.1	784.786	747.571	888.712	1497.82	1095.3	1166.52
NM_001376223.1	858.46	798.679	573.666	319.089	403.377	367.855
NM_001376312.2	491.158	506.064	513.713	514.339	582.001	584.61
NM_001376342.1	2453.66	2497.25	2378.13	4560.36	3817.85	3849.43
NM_001376376.1	4056.33	4125.67	3610.1	5528.47	5060.37	5065.42
NM_001376558.2	746.347	675.42	625.39	716.821	719.404	818.454
NM_001376587.1	459.126	525.104	474.92	410.387	346.453	439.807
NM_001376852.1	1317.59	1310.76	1488.24	1401.1	1257.24	1222.28
NM_001376937.1	14.9483	15.0316	1.17554	6.32755	4.90726	9.8934
NM_001377.3	449.517	507.066	604.23	771.961	754.737	703.331
NM_001377137.1	1095.5	1048.2	1102.66	1213.08	1406.42	1366.19
NM_001377229.1	326.727	408.859	394.983	154.573	178.624	175.383
NM_001377299.1	1646.45	1806.8	1748.03	1383.02	1525.18	1436.34
NM_001377334.1	452.72	492.034	513.713	325.417	510.355	551.332
NM_001377405.1	458.059	457.963	458.462	770.153	675.239	650.266
NM_001377448.1	802.937	740.557	684.167	1035.91	1150.26	1299.63
NM_001377458.1	745.28	702.477	706.502	637.275	626.166	642.172
NM_001377500.1	968.436	939.976	972.175	988.002	1448.62	1496.6
NM_001377540.1	578.713	472.994	531.346	888.569	708.608	680.846
NM_001377935.1	1366.7	1325.79	1428.29	2392.72	2282.86	2411.29
NM_001377960.1	861.663	963.024	1090.91	585.75	671.313	644.87
NM_001378.3	2766.5	2923.14	3219.82	2908.86	2729.42	2617.25
NM_001378024.1	987.656	902.898	956.893	1408.33	1073.71	1106.26
NM_001378026.1	280.815	206.434	316.222	461.911	322.898	310.293
NM_001378067.1	1390.19	1243.61	1369.51	781.904	958.879	894.004
NM_001378074.1	1889.89	1568.3	1805.64	1396.58	1367.16	1447.13
NM_001378107.1	848.85	874.839	941.611	1129.92	1118.86	1064.89
NM_001378120.1	297.898	338.712	330.328	749.363	582.001	523.451
NM_001378122.1	653.454	542.14	613.634	432.985	512.318	521.652
NM_001378204.1	263.731	238.501	231.582	257.622	217.882	220.353
NM_001378213.1	1232.17	1123.36	990.984	1679.51	1774.47	1983.18
NM_001378328.1	3810.75	3317.97	3478.44	4557.64	4304.65	4478.11
NM_001378414.1	347.014	493.036	481.973	733.092	706.646	739.307
NM_001378418.1	832.834	689.449	802.897	1113.65	1177.74	1195.3
NM_001378454.1	717.518	680.43	706.502	1116.36	993.23	1043.3
NM_001378457.1	781.583	786.654	868.728	997.041	1065.86	1032.51
NM_001378615.1	368.369	369.777	350.312	370.614	463.245	406.529
NM_001378687.1	1556.76	1551.26	1789.18	2064.59	1791.15	1767.32
NM_001378743.1	316.05	283.596	329.153	301.011	302.287	246.436
NM_001378778.1	1652.86	1860.91	1809.16	2709.1	2588.09	2466.15
NM_001378964.1	775.176	846.78	831.11	783.712	1003.04	902.998
NM_001378974.1	1417.95	1342.82	1504.7	2120.63	1943.28	1997.57
NM_001379029.1	435.636	293.617	420.845	450.16	605.556	506.362
NM_001379081.2	382.249	362.763	410.265	172.652	317.991	261.725
NM_001379110.1	516.784	512.076	513.713	453.776	580.038	590.006
NM_001379286.1	2504.91	2997.3	2608.53	3062.53	3407.6	3369.15
NM_001379291.1	2084.22	2036.28	1657.52	3845.34	3218.18	3454.6
NM_001379313.1	1084.82	1051.21	1085.03	789.136	853.863	901.199
NM_001379403.1	1918.72	1917.03	2063.08	3387.05	3305.53	3390.74
NM_001379451.1	812.547	751.58	840.514	653.545	678.183	670.952
NM_001379659.1	1116.85	969.037	980.404	1251.95	1185.59	1080.18
NM_001381853.1	1373.11	1378.9	1699.84	1760.87	1582.1	1473.22
NM_001381865.2	1517.25	1469.09	1656.34	1901.88	1786.24	1785.31
NM_001382.4	485.82	433.912	439.654	475.47	507.411	513.557
NM_001382226.1	5303.44	5986.58	5877.72	4529.62	4779.67	4850.46
NM_001382241.1	2724.86	2524.31	2696.7	2955.87	2840.32	2978.81
NM_001382266.1	558.426	685.441	426.723	419.426	493.67	550.433
NM_001382293.1	1688.09	1990.18	1535.26	1348.67	1425.07	1487.61
NM_001382294.1	2235.84	2510.28	1953.76	1702.11	1617.43	1631.51
NM_001382309.1	1855.72	1759.7	2152.42	2779.6	2676.42	2904.16
NM_001382344.1	322.456	388.817	264.498	295.587	210.031	337.275
NM_001382347.1	1062.4	947.993	1093.26	1381.21	1160.08	1018.12
NM_001382391.1	325.659	298.628	272.726	335.36	322.898	286.909
NM_001382430.1	4669.21	4575.62	4536.43	4513.35	4369.43	4541.97
NM_001382507.1	523.191	513.078	432.6	279.316	273.825	295.903
NM_001382508.1	1723.33	1492.14	1655.17	1719.29	1813.72	1636.91
NM_001382548.1	1912.31	1866.92	1927.89	2392.72	2148.4	2201.73
NM_001382567.1	954.556	858.805	909.872	781	748.848	829.247
NM_001382683.1	298.966	326.687	417.318	313.666	272.844	256.329
NM_001382779.1	2231.57	2524.31	2222.95	2163.12	2337.82	2485.04
NM_001384125.1	722.857	693.458	893.414	1239.3	1070.76	1075.68
NM_001384369.1	1369.91	1394.93	1249.6	913.879	961.823	1006.43
NM_001384528.1	3898.3	3899.2	3635.96	4786.34	4394.94	5076.21
NM_001384574.2	2549.75	2207.64	2351.09	3925.79	3287.86	3562.52
NM_001384609.1	442.043	484.017	473.745	309.146	336.638	369.653
NM_001384647.1	4695.9	5117.76	3876.95	3426.82	3946.42	3969.95
NM_001384732.1	500.768	352.741	403.212	568.576	593.779	571.119
NM_001384980.1	3232.04	3504.37	2838.94	2851.01	2445.78	2467.95
NM_001385012.1	1032.5	1116.35	1108.54	1792.5	1586.03	1448.93
NM_001385016.1	210.344	222.468	262.146	301.011	279.714	271.619
NM_001385026.1	695.096	625.314	755.875	1297.15	1252.33	1138.64
NM_001385079.1	543.478	435.916	633.619	801.791	664.443	644.87
NM_001385109.1	5387.79	5512.59	4886.74	4644.42	5008.35	5238.11
NM_001385174.1	988.723	801.685	814.652	974.443	825.401	791.472
NM_001385305.1	4155.63	3864.12	3678.28	3478.34	3695.17	3629.98
NM_001385408.1	1966.77	2060.33	1939.65	1440.87	1406.42	1445.34
NM_001385469.3	880.882	799.681	854.621	743.939	674.258	706.029
NM_001385482.1	515.716	435.916	473.745	395.924	476.004	392.138
NM_001385682.1	7113.26	8031.88	7770.35	7865.14	7428.61	7654.79
NM_001385745.1	262.663	206.434	265.673	248.582	277.751	283.311
NM_001385875.1	657.725	635.335	667.709	470.047	456.375	564.823
NM_001385981.1	1079.48	970.039	1257.83	1294.44	1369.13	1450.73
NM_001385994.1	676.944	681.432	726.487	1143.48	956.916	876.915
NM_001386135.1	1307.98	1305.74	1476.48	2036.57	2059.09	2054.23
NM_001386140.1	165.499	175.369	149.294	175.364	172.736	173.584
NM_001386188.2	590.458	725.525	660.656	1125.4	984.397	1040.61
NM_001386298.1	2038.31	1961.12	1775.07	3461.17	2986.56	3218.05
NM_001386393.1	1254.59	1262.65	1153.21	1358.62	1199.33	1294.24
NM_001386795.1	752.754	664.397	677.114	1349.58	1168.91	1068.49
NM_001386863.1	3053.72	3359.06	3273.89	3233.38	3421.34	3424.02
NM_001386888.1	5574.65	5671.92	5789.56	8134.52	8219.66	8038.84
NM_001386889.1	428.162	390.821	452.585	692.415	581.02	556.729
NM_001386928.1	1384.85	1446.04	1387.14	945.517	1079.6	976.748
NM_001386936.1	1268.47	1290.71	1376.56	1473.42	1640.01	1612.62
NM_001387011.1	545.613	597.255	657.129	520.667	495.633	582.811
NM_001387048.1	723.925	730.536	664.183	735.804	812.642	745.603
NM_001387283.1	350.217	495.041	233.933	517.955	427.913	501.865
NM_001387287.1	198.599	178.375	181.034	238.639	263.029	223.051
NM_001387360.1	430.298	461.971	440.829	678.856	696.831	644.87
NM_001387430.1	1001.54	940.978	892.238	775.577	908.825	871.519
NM_001387552.1	972.707	1077.26	1195.53	1750.92	1579.16	1537.07
NM_001387579.1	557.358	443.933	498.431	913.879	825.401	875.116
NM_001387691.1	2894.63	2554.37	2647.33	4363.3	3757.98	4044.6
NM_001387844.1	2404.54	2640.55	2361.67	4183.41	3869.87	3878.21
NM_001387850.1	160.16	167.352	181.034	399.54	238.493	229.347
NM_001387994.1	3362.3	3134.59	3584.24	4186.13	4127.99	4095.87
NM_001388.5	625.693	706.485	655.954	433.889	435.765	443.404
NM_001388303.1	694.028	845.778	862.85	1792.5	1628.23	1679.18
NM_001388306.1	8955.1	8789.48	8612.04	11517.9	10531	11644.5
NM_001388419.1	209.276	185.39	291.535	456.488	454.412	366.056
NM_001388490.1	3925	4434.32	3982.75	5437.17	5848.47	6221.15
NM_001388492.1	1928.33	1886.97	2074.84	2734.41	2852.1	2896.97
NM_001389683.1	2012.68	1877.95	1669.27	2118.83	1821.58	1949
NM_001391906.1	1803.41	1647.46	1932.6	2860.96	2817.75	2788.14
NM_001391956.1	547.748	506.064	521.942	505.3	638.925	566.622
NM_001391963.1	4851.79	4936.38	4662.21	4949.95	4699.19	4503.3
NM_001392073.1	405.74	361.76	393.807	276.604	293.454	316.589
NM_001393381.1	474.075	355.748	432.6	796.367	637.944	707.828
NM_001393769.1	80.0802	112.236	121.081	188.019	160.958	144.803
NM_001393918.1	2215.55	1822.83	1926.72	1541.21	1580.14	1863.56
NM_001393986.1	922.524	775.63	835.812	2260.74	1902.05	1975.98
NM_001393997.1	3551.29	3612.59	3753.51	3566.93	3671.61	3643.47
NM_001394.7	2657.59	2308.85	2451.01	1661.43	2035.53	1978.68
NM_001394014.1	1345.35	1333.8	1538.79	1897.36	1808.82	1817.69
NM_001394031.1	695.096	660.388	654.778	670.72	718.423	661.958
NM_001394062.1	4369.17	4066.55	4518.79	6601.44	7541.48	6832.74
NM_001394067.2	1350.69	1215.56	1437.69	4328.95	3249.59	3054.36
NM_001394073.1	335.269	272.573	345.61	369.71	303.269	302.198
NM_001394098.1	1498.03	1480.11	1517.63	3042.65	2054.18	2088.41
NM_001394154.1	1018.62	1082.27	1022.72	1079.3	1158.11	1091.87
NM_001394372.1	546.681	515.083	419.669	504.396	668.369	713.224
NM_001394390.1	462.33	503.057	492.553	463.719	452.449	464.09
NM_001394395.1	418.552	280.59	342.084	437.505	349.397	357.961
NM_001394674.1	875.543	801.685	648.901	765.633	745.904	765.389
NM_001394779.1	217.818	212.447	213.949	139.206	132.496	135.809
NM_001394796.1	1249.25	1227.58	1275.47	1091.95	1014.82	983.944
NM_001394837.1	3249.12	2959.22	3173.97	4234.94	4126.03	4184.01
NM_001394901.1	2.13547	1.00211	0	1.80787	365.1	464.99
NM_001394928.1	601.135	676.422	513.713	303.722	436.746	442.505
NM_001394955.1	298.966	308.649	306.817	299.203	331.731	318.388
NM_001397.3	2481.42	2397.04	2419.27	2485.82	2686.23	3020.18
NM_001398.3	1669.94	1589.34	1524.68	1026.87	1238.59	1209.69
NM_001402.6	276607	291481	283424	226055	225233	229324
NM_001404.5	41014.9	43029.4	40494	30550.3	32053.2	33079
NM_001407.3	1408.34	1287.71	1271.94	1740.08	1572.29	1634.21
NM_001408.3	3284.36	3042.4	3357.36	5874.68	5522.63	5686.01
NM_001412.4	2664	2938.18	3152.81	2912.48	2645.01	2627.15
NM_001414.4	1700.9	1628.42	1530.56	1442.68	1473.16	1387.77
NM_001415.4	6165.11	6213.06	5539.17	5301.58	5244.88	5107.69
NM_001416.4	6608.22	6184	6090.5	5712.87	6303.87	6854.33
NM_001417.7	8509.85	9024.97	8675.52	8248.41	8733.94	8729.58
NM_001418.4	30943	30052.2	32242.8	37363.3	35343.1	34528
NM_001419.3	4465.27	4347.14	4281.33	4848.71	4736.49	4704.76
NM_001420.4	2103.44	1807.8	1777.42	1891.03	1710.67	1825.78
NM_001423.3	2953.36	2966.23	2815.43	7151.94	5669.85	6146.5
NM_001424.6	505.039	516.085	383.228	571.287	465.208	539.64
NM_001425.3	486.888	602.266	399.685	358.862	466.19	492.871
NM_001426.4	1459.59	1522.2	1363.63	2486.73	1965.85	2275.48
NM_001427.4	6425.63	6019.65	5675.53	18907.6	18367.9	19532.3
NM_001428.5	26901.6	29605.2	30091.6	26237.6	28198.1	28171
NM_001429.4	1754.29	1701.58	1746.86	3306.6	2823.64	2795.33
NM_001431.4	2416.29	2469.19	2359.32	2287.86	2141.53	2156.76
NM_001436.4	4420.43	4684.85	4018.01	3688.96	3905.2	4175.01
NM_001440.4	4075.55	4027.47	4398.89	4234.94	4861.13	4537.47
NM_001444.3	1666.74	1774.73	1547.02	1452.62	1363.24	1418.35
NM_001446.5	10243.9	11245.6	9938.05	6934.99	7980.19	7965.09
NM_001448.3	15972.3	16019.7	15612.4	21421.5	19143.2	19112.2
NM_001455.4	760.228	778.637	808.775	564.96	661.499	666.455
NM_001457.4	1014.35	1144.41	1041.53	828.005	785.162	755.496
NM_001458.5	2589.26	2722.72	2762.53	7612.95	3970.96	4497.9
NM_001466.4	1610.15	1615.4	1448.27	804.503	1288.65	1221.39
NM_001469.5	10284.4	10429.9	9906.32	10641.1	10848	10513.1
NM_001470.4	1966.77	1763.71	1829.15	1359.52	1468.25	1585.64
NM_001482.3	384.385	441.929	478.447	433.889	501.522	527.948
NM_001483.3	1701.97	1684.54	1574.05	1499.63	1545.79	1556.86
NM_001485.4	4131.07	4287.01	3711.19	3199.93	4981.85	4848.66
NM_001487.4	1264.2	1312.76	925.154	780.096	905.88	968.654
NM_001493.3	7924.74	8333.52	7698.64	7159.17	6917.28	7125.05
NM_001494.4	7532.88	7297.34	6995.67	7739.5	7385.43	7101.66
NM_001497.4	364.098	385.811	371.472	396.828	381.785	393.038
NM_001498.4	311.779	321.676	351.488	296.491	276.77	316.589
NM_001500.4	296.831	267.562	257.444	182.595	182.55	234.743
NM_001510.4	40.574	49.1032	76.4104	51.5243	75.5718	62.0586
NM_001512.4	1210.81	1190.5	1116.77	844.276	915.695	857.128
NM_001514.6	336.337	366.771	355.014	436.601	429.876	394.837
NM_001516.5	1493.76	1468.09	1648.11	938.285	859.752	922.784
NM_001519.4	833.902	799.681	819.355	588.462	675.239	656.562
NM_001520.4	2105.58	2142.5	2295.84	2515.65	2581.22	2617.25
NM_001527.4	5568.24	5650.88	5606.17	6678.28	6157.63	6143.8
NM_001530.4	2946.95	2569.4	3182.2	3739.58	3688.3	3648.87
NM_001533.3	6955.23	7044.81	7812.67	7501.76	7738.75	7535.17
NM_001536.6	5847.99	6194.02	5550.92	5618.86	6052.62	5848.8
NM_001537.4	4274.15	4740.97	4323.65	4027.94	4255.58	4210.99
NM_001539.4	4815.49	5000.51	4958.45	7344.48	5993.73	5864.09
NM_001540.5	4796.27	5455.47	4193.17	3129.43	3829.63	4076.08
NM_001543.5	3876.95	3857.11	3958.06	5475.14	5205.62	5590.67
NM_001545.3	591.526	616.295	557.208	416.714	411.228	396.635
NM_001546.4	3614.29	3875.15	3820.52	15780.9	12311.3	12372.1
NM_001550.4	1290.89	1425	1471.78	1837.7	1852	1815.89
NM_001551.3	905.44	839.765	699.449	856.931	734.126	708.727
NM_001553.3	393.995	474.998	457.287	235.927	334.675	305.796
NM_001554.5	6389.33	6842.38	6450.21	16708.3	14009.2	14439.9
NM_001556.3	775.176	686.443	815.828	739.419	781.236	751.898
NM_001560.3	1333.6	1241.61	1276.64	1143.48	1085.49	1088.27
NM_001567.4	2703.51	2681.64	2735.49	3712.46	3719.7	3873.72
NM_001568.3	5602.41	5580.73	5130.08	6030.15	5468.65	5159.86
NM_001569.4	1849.32	1895.99	1852.66	1987.75	2396.71	2442.77
NM_001571.6	1004.74	983.066	1034.48	854.219	885.27	999.233
[truncated: 6,434 more rows]
