# Supplementary material for: eIF3 engages with 3’-UTR termini of highly translated mRNAs
Source: bioRxiv preprint, doi:10.1101/2023.11.11.566681, version 4 (2024-11-24)
Supplement: Supplementary File 6 [file 566681_file07.xlsx]

## Sheet: SantiNPC.DESeq2normalized.monoA
Transcript	Monosome_Diff_1	Monosome_Diff_2	Monosome_Diff_3	Monosome_Undiff_1	Monosome_Undiff_2	Monosome_Undiff_3	Disome_Diff_1	Disome_Diff_2	Disome_Diff_3	Disome_Undiff_1	Disome_Undiff_2	Disome_Undiff_3
NM_000014.6	4655.98	4871.71	4827.64	6081.29	6087.8	5709.21	3446.65	3694.3	3902.2	5458.25	4845.83	4095.48
NM_000016.6	140.67	139.397	151.2	200.244	172.881	154.222	62.0087	77.4427	105.852	132.787	89.3024	74.9969
NM_000018.4	67.0142	47.6622	54.4319	50.0234	49.7184	54.2757	25.8369	57.3649	74.3821	45.4272	56.4015	48.911
NM_000019.4	106.861	107.29	119.616	146.176	143.747	125.099	98.1804	97.5204	97.269	80.3712	117.503	104.344
NM_000021.4	87.5411	97.3185	88.0319	96.9017	85.4808	89.0254	82.6782	77.4427	68.6604	80.3712	51.7014	52.1718
NM_000026.4	120.143	153.556	152.88	179.425	166.251	153.23	98.1804	68.8379	94.4081	108.326	70.5019	78.2577
NM_000027.4	18.112	19.3441	18.144	26.5094	23.0275	28.1307	5.16739	11.473	8.58256	20.9664	4.70012	6.52147
NM_000038.6	161.8	180.677	160.272	159.656	168.345	165.144	98.1804	177.831	134.46	181.709	220.906	241.294
NM_000043.6	8.45225	13.1619	8.39999	9.13602	9.59478	12.907	10.3348	5.73649	2.86085	6.9888	9.40025	0
NM_000044.6	39.8463	40.4829	44.6879	37.5925	32.7967	31.7711	51.6739	63.1014	60.0779	69.888	37.601	78.2577
NM_000046.5	31.9978	36.4944	33.936	49.1248	64.7212	57.2543	31.0043	40.1555	25.7477	27.9552	14.1004	29.3466
NM_000048.4	16.3008	16.3527	22.176	16.4748	16.9217	16.5475	20.6696	14.3412	28.6085	24.4608	18.8005	13.0429
NM_000051.4	210.099	223.354	201.6	269.587	270.224	231.665	186.026	183.568	228.868	352.934	263.207	264.12
NM_000052.7	60.9769	52.0495	58.4639	47.028	44.6593	41.3687	36.1717	48.7602	22.8868	38.4384	32.9009	32.6074
NM_000053.4	10.2634	15.3556	8.73599	9.28579	11.3393	10.2594	10.3348	34.419	14.3043	6.9888	4.70012	13.0429
NM_000055.4	150.329	176.091	162.624	186.914	167.298	161.503	129.185	174.963	154.486	188.698	206.805	143.472
NM_000057.4	92.9747	102.304	100.128	110.082	114.614	100.278	139.52	80.3109	85.8256	136.282	89.3024	101.083
NM_000059.4	89.3523	90.1393	96.0959	119.367	128.745	115.832	62.0087	111.862	97.269	195.686	173.905	140.212
NM_000062.3	196.817	200.221	185.136	165.497	170.613	200.555	196.361	140.544	160.208	167.731	197.405	149.994
NM_000067.3	108.068	76.5785	80.6399	18.8711	23.5508	20.5189	82.6782	48.7602	51.4953	10.4832	18.8005	16.3037
NM_000071.3	38.6388	36.8933	42.6719	29.2053	31.4011	33.4259	82.6782	88.9157	71.5213	59.4048	61.1016	74.9969
NM_000075.4	207.08	215.577	242.928	245.025	240.044	240.931	139.52	192.173	148.764	241.114	249.107	195.644
NM_000077.5	13.8858	11.5665	11.088	7.189	7.85028	13.238	5.16739	5.73649	8.58256	17.472	14.1004	9.78221
NM_000081.4	53.7321	28.7169	34.272	19.7697	19.7129	12.907	180.859	88.9157	48.6345	31.4496	32.9009	26.0859
NM_000082.4	15.0933	12.5637	13.44	13.0301	13.4327	11.2523	5.16739	8.60474	20.026	13.9776	4.70012	39.1288
NM_000088.4	107.464	116.463	123.984	76.0836	98.2157	85.385	201.528	166.358	211.703	115.315	159.804	91.3006
NM_000089.4	115.313	102.703	109.872	105.738	124.034	114.839	124.017	131.939	134.46	129.293	145.704	74.9969
NM_000090.4	34.4127	26.1244	27.552	22.0163	27.2143	26.8069	31.0043	20.0777	40.0519	66.3936	56.4015	29.3466
NM_000096.4	157.574	154.553	157.92	178.976	182.301	154.222	113.683	131.939	137.321	111.821	136.304	120.647
NM_000097.7	22.3381	15.3556	17.808	14.8273	15.3516	18.2022	25.8369	20.0777	20.026	20.9664	4.70012	16.3037
NM_000098.3	29.5829	33.3037	27.216	70.8416	69.6058	69.8303	25.8369	25.8142	25.7477	115.315	84.6022	68.4754
NM_000099.4	50.1097	64.8125	76.2719	80.5767	84.6085	59.24	98.1804	74.5744	54.3562	111.821	51.7014	65.2147
NM_000100.4	26.5642	35.0985	30.576	20.6684	20.7596	40.7068	31.0043	14.3412	8.58256	20.9664	9.40025	13.0429
NM_000108.5	243.908	234.721	268.128	293.101	283.657	284.947	191.193	131.939	171.651	234.125	206.805	172.819
NM_000110.4	14.4896	12.7631	15.456	11.3826	11.8626	11.2523	5.16739	14.3412	11.4434	3.4944	14.1004	13.0429
NM_000112.4	24.753	38.4887	31.248	57.8115	58.9643	66.5208	20.6696	43.0237	14.3043	45.4272	28.2007	65.2147
NM_000113.3	48.9023	44.8702	51.4079	48.376	50.2418	53.2829	10.3348	57.3649	45.7736	41.9328	47.0012	22.8251
NM_000117.3	54.3359	60.6247	54.7679	65.3001	67.6868	87.0397	41.3391	43.0237	14.3043	41.9328	56.4015	74.9969
NM_000122.2	54.9396	63.4166	53.4239	45.081	51.8118	49.9734	98.1804	57.3649	60.0779	48.9216	98.7026	35.8681
NM_000123.4	48.9023	46.2662	46.3679	48.5257	58.9643	51.9591	25.8369	43.0237	54.3562	69.888	70.5019	65.2147
NM_000124.4	15.697	16.1533	12.096	20.0693	20.5852	20.8498	5.16739	25.8142	14.3043	13.9776	9.40025	9.78221
NM_000126.4	164.819	167.516	197.568	176.73	172.183	179.706	98.1804	83.1792	128.738	101.338	112.803	133.69
NM_000127.3	30.1866	31.7083	34.272	45.3805	40.9959	42.3615	36.1717	45.892	25.7477	62.8992	56.4015	55.4325
NM_000135.4	35.0164	28.9164	35.952	36.3943	35.4135	30.1164	108.515	91.7839	114.434	139.776	61.1016	101.083
NM_000136.3	42.2612	41.8789	38.304	44.6317	46.4039	43.6853	41.3391	45.892	62.9387	52.416	61.1016	48.911
NM_000137.4	17.5082	18.7458	18.144	22.7652	17.794	21.5117	25.8369	17.2095	8.58256	24.4608	23.5006	19.5644
NM_000138.5	104.446	106.293	114.24	123.112	131.536	111.861	62.0087	68.8379	97.269	69.888	61.1016	94.5613
NM_000140.5	33.2053	28.3181	26.544	36.2445	35.0646	32.764	5.16739	14.3412	17.1651	10.4832	18.8005	13.0429
NM_000141.5	12.0746	10.7689	9.07199	8.53693	6.10577	4.63329	10.3348	20.0777	17.1651	10.4832	4.70012	9.78221
NM_000142.5	31.9978	21.1389	24.864	13.1798	12.386	12.5761	134.352	74.5744	120.156	31.4496	56.4015	52.1718
NM_000143.4	213.117	222.556	238.896	275.728	281.912	246.888	201.528	186.436	171.651	167.731	173.905	146.733
NM_000144.5	13.2821	12.3642	13.104	14.9771	16.3984	15.5546	0	5.73649	8.58256	3.4944	0	19.5644
NM_000146.4	101.427	93.7289	109.872	148.273	181.08	132.38	180.859	140.544	240.312	265.574	390.11	221.73
NM_000152.5	22.3381	23.9308	23.856	20.8181	24.772	25.4831	20.6696	25.8142	62.9387	52.416	37.601	35.8681
NM_000153.4	65.8068	76.7779	74.9279	88.0652	94.5522	98.9539	36.1717	37.2872	51.4953	48.9216	75.202	65.2147
NM_000156.6	12.6784	11.3671	16.8	14.0785	12.9093	13.5689	10.3348	11.473	8.58256	3.4944	9.40025	9.78221
NM_000157.4	59.1657	68.801	59.1359	60.8069	68.908	66.5208	46.5065	45.892	57.217	83.8656	84.6022	94.5613
NM_000158.4	60.3732	62.8183	65.5199	89.2634	89.4931	73.4708	67.1761	68.8379	62.9387	69.888	65.8017	88.0399
NM_000159.4	19.3194	17.5492	14.784	17.673	10.467	17.2094	31.0043	14.3412	20.026	17.472	28.2007	29.3466
NM_000165.5	1135.62	937.887	983.135	903.268	926.158	791.962	1235.01	1023.96	978.411	775.757	803.721	652.147
NM_000168.6	93.5784	120.252	104.496	86.7173	89.842	101.932	294.541	349.926	268.92	132.787	202.105	218.469
NM_000169.3	37.4314	43.6737	41.6639	33.8482	32.6223	31.7711	25.8369	51.6284	34.3302	27.9552	51.7014	22.8251
NM_000170.3	147.914	142.388	140.784	204.737	195.559	166.137	118.85	131.939	125.877	272.563	249.107	179.34
NM_000175.5	240.285	236.117	231.168	194.852	199.397	224.384	268.704	263.879	208.842	195.686	178.605	195.644
NM_000176.3	14.4896	14.3585	13.776	29.8044	19.8874	26.476	0	5.73649	0	31.4496	9.40025	22.8251
NM_000178.4	52.5247	52.2489	55.1039	54.6663	53.2074	56.2614	82.6782	60.2332	57.217	55.9104	56.4015	58.6932
NM_000179.3	488.419	517.902	536.591	519.854	576.908	478.553	449.563	476.129	483.484	552.115	582.815	417.374
NM_000181.4	26.5642	20.9394	22.848	21.1177	22.3297	23.4974	36.1717	40.1555	34.3302	41.9328	32.9009	39.1288
NM_000182.5	381.559	391.667	394.127	442.423	422.17	404.089	377.219	407.291	377.632	492.711	357.209	319.552
NM_000183.3	203.458	189.851	193.872	224.357	220.506	215.448	258.369	278.22	231.729	248.102	239.706	264.12
NM_000186.4	19.3194	19.9423	19.824	19.4702	25.9931	24.1593	10.3348	11.473	17.1651	27.9552	9.40025	13.0429
NM_000188.3	143.688	156.946	186.48	135.393	160.32	169.777	155.022	172.095	100.13	122.304	183.305	149.994
NM_000189.5	34.4127	32.7054	39.3119	39.2399	39.0769	35.4116	31.0043	63.1014	48.6345	55.9104	47.0012	48.911
NM_000190.4	13.2821	18.1475	22.848	22.4656	24.9464	21.8427	10.3348	17.2095	14.3043	17.472	14.1004	16.3037
NM_000191.3	23.5455	24.5291	19.152	35.1961	33.3201	36.7354	36.1717	14.3412	40.0519	27.9552	28.2007	16.3037
NM_000194.3	56.7508	46.4656	46.7039	77.2817	72.7459	66.8518	56.8413	31.5507	28.6085	62.8992	79.9021	45.6503
NM_000195.5	15.697	10.1706	12.432	12.7305	11.6882	8.93564	10.3348	14.3412	37.1911	38.4384	32.9009	29.3466
NM_000199.5	4.82986	15.555	11.424	12.2812	12.2115	14.8927	5.16739	11.473	14.3043	17.472	32.9009	6.52147
NM_000202.8	25.3567	32.1071	22.848	34.5971	39.4258	43.6853	87.8456	108.993	42.9128	90.8544	108.103	149.994
NM_000204.5	18.7157	16.3527	16.128	23.514	21.6319	20.1879	31.0043	17.2095	34.3302	27.9552	9.40025	19.5644
NM_000210.4	61.5807	70.7952	81.9839	98.3994	104.67	107.559	15.5022	25.8142	37.1911	55.9104	28.2007	39.1288
NM_000213.5	18.7157	14.5579	15.792	14.0785	16.3984	17.2094	46.5065	54.4967	20.026	20.9664	37.601	35.8681
NM_000214.3	823.49	645.334	711.311	376.374	386.582	345.511	816.448	631.014	609.361	398.362	427.711	361.942
NM_000215.4	19.3194	19.1446	17.808	21.1177	20.9341	29.1236	46.5065	71.7062	40.0519	45.4272	37.601	58.6932
NM_000232.5	104.446	101.905	105.168	122.812	110.253	111.199	51.6739	37.2872	42.9128	41.9328	42.3011	39.1288
NM_000234.3	68.2217	75.1826	66.8639	65.1503	68.908	68.5065	113.683	137.676	117.295	185.203	112.803	114.126
NM_000235.4	92.9747	117.261	121.296	160.554	183.173	154.884	186.026	137.676	183.095	279.552	272.607	221.73
NM_000237.3	229.418	412.208	393.455	421.006	445.198	407.73	180.859	478.997	429.128	412.339	380.71	456.503
NM_000249.4	143.084	144.781	144.144	144.379	151.772	131.056	160.189	160.622	214.564	206.17	155.104	149.994
NM_000251.3	441.328	465.055	453.599	548.91	572.023	473.92	397.889	407.291	437.71	471.744	498.213	414.113
NM_000252.3	36.8276	37.4916	32.256	36.5441	36.9835	29.1236	41.3391	31.5507	57.217	52.416	65.8017	16.3037
NM_000254.3	76.6739	74.7837	79.6319	72.1895	78.3283	63.5423	51.6739	86.0474	62.9387	83.8656	89.3024	74.9969
NM_000255.4	78.4851	94.9255	99.4559	104.84	104.845	97.6301	51.6739	63.1014	51.4953	45.4272	56.4015	71.7362
NM_000262.3	22.9418	20.5406	22.512	31.4519	30.3544	28.7926	15.5022	43.0237	37.1911	24.4608	61.1016	39.1288
NM_000264.5	34.4127	25.5262	30.912	34.5971	40.4725	45.0091	56.8413	117.598	82.9647	87.36	136.304	140.212
NM_000268.4	27.7717	32.506	34.272	35.945	30.5288	39.383	46.5065	54.4967	60.0779	38.4384	51.7014	78.2577
NM_000269.3	207.08	200.021	182.448	169.241	156.133	202.872	124.017	140.544	117.295	62.8992	103.403	91.3006
NM_000270.4	35.6202	28.1187	22.512	27.7076	25.4698	33.0949	41.3391	31.5507	45.7736	69.888	70.5019	61.954
NM_000271.5	190.176	158.94	170.688	138.838	150.027	140.323	180.859	166.358	108.712	157.248	164.504	120.647
NM_000274.4	102.031	101.506	100.8	110.98	113.044	110.206	144.687	140.544	128.738	143.27	150.404	127.169
NM_000276.4	49.506	65.012	51.0719	67.8462	67.5124	64.2042	41.3391	43.0237	42.9128	48.9216	65.8017	52.1718
NM_000281.4	18.112	26.7227	24.192	20.6684	18.3173	30.4474	31.0043	11.473	14.3043	6.9888	4.70012	9.78221
NM_000282.4	44.0724	57.8327	44.6879	46.7285	46.4039	48.9805	20.6696	37.2872	42.9128	48.9216	37.601	39.1288
NM_000284.4	83.315	93.1306	105.84	117.42	115.486	109.544	82.6782	86.0474	68.6604	73.3824	75.202	91.3006
NM_000285.4	42.865	34.3008	45.0239	27.5578	33.4945	31.7711	56.8413	22.946	34.3302	31.4496	23.5006	35.8681
NM_000289.6	164.819	161.333	186.144	164.598	160.146	170.108	206.696	180.7	194.538	167.731	122.203	185.862
NM_000291.4	495.664	501.549	495.599	613.461	570.628	559.966	713.1	628.146	695.187	887.578	756.72	613.018
NM_000292.3	15.0933	15.7544	18.816	17.8227	21.8063	22.8355	31.0043	14.3412	31.4694	31.4496	51.7014	39.1288
NM_000293.3	78.4851	78.5727	79.2959	136.741	128.57	126.754	87.8456	83.1792	71.5213	115.315	141.004	153.255
NM_000297.4	25.3567	31.9077	26.88	45.5303	37.5069	40.0449	46.5065	65.9697	25.7477	104.832	37.601	68.4754
NM_000302.4	102.031	107.689	91.7279	90.6113	101.53	112.854	98.1804	108.993	111.573	111.821	84.6022	123.908
NM_000303.3	24.753	26.9221	28.224	31.4519	27.2143	22.8355	15.5022	14.3412	22.8868	31.4496	9.40025	26.0859
NM_000304.4	61.5807	86.7491	56.4479	52.1202	53.3819	66.5208	129.185	157.754	114.434	146.765	108.103	88.0399
NM_000305.3	629.089	685.218	653.519	762.184	723.098	776.738	180.859	232.328	237.451	178.214	230.306	299.988
NM_000307.5	34.4127	31.5089	29.904	17.0739	18.4918	14.5618	36.1717	45.892	71.5213	55.9104	47.0012	39.1288
NM_000308.4	75.4665	87.5468	85.3439	87.1666	81.1195	83.0683	51.6739	57.3649	68.6604	69.888	47.0012	58.6932
NM_000310.4	161.196	150.963	168.336	195.301	193.815	179.044	124.017	108.993	123.017	101.338	117.503	91.3006
NM_000311.5	33.2053	34.8991	37.632	21.4172	22.6786	30.4474	5.16739	25.8142	31.4694	10.4832	0	6.52147
NM_000313.4	74.8628	81.3647	73.2479	119.966	117.231	100.278	31.0043	28.6825	31.4694	87.36	84.6022	45.6503
NM_000314.8	39.2426	45.2691	43.6799	56.4636	60.7088	55.9305	31.0043	34.419	22.8868	38.4384	65.8017	48.911
NM_000317.3	36.8276	30.3123	34.272	38.9404	37.8558	29.1236	15.5022	14.3412	5.7217	17.472	28.2007	22.8251
NM_000318.3	27.1679	22.7342	23.856	29.3551	28.6099	30.4474	15.5022	8.60474	17.1651	17.472	9.40025	6.52147
NM_000320.3	31.9978	43.0754	33.936	38.6409	39.4258	47.6567	15.5022	37.2872	20.026	34.944	37.601	39.1288
NM_000321.3	291.602	282.982	265.104	284.115	289.588	279.652	118.85	152.017	131.599	202.675	206.805	185.862
NM_000328.3	13.8858	17.9481	14.112	13.1798	9.42033	9.26659	15.5022	11.473	11.4434	6.9888	18.8005	6.52147
NM_000329.3	15.697	19.1446	18.816	41.786	37.5069	29.1236	5.16739	22.946	25.7477	20.9664	23.5006	19.5644
NM_000344.4	100.823	115.466	116.256	117.121	128.745	149.92	67.1761	48.7602	34.3302	41.9328	37.601	48.911
NM_000346.4	69.4292	84.5554	77.6159	23.6638	33.669	38.3901	87.8456	103.257	102.991	59.4048	47.0012	52.1718
NM_000355.4	66.4105	82.7606	77.6159	88.6643	86.353	86.3778	67.1761	80.3109	74.3821	73.3824	89.3024	107.604
NM_000365.6	499.89	458.075	533.567	424.301	447.291	462.336	583.915	487.602	529.258	597.543	465.312	440.199
NM_000367.5	25.9605	21.9366	25.536	33.6984	28.0865	31.1092	10.3348	14.3412	8.58256	17.472	9.40025	9.78221
NM_000368.5	39.2426	32.3066	33.6	23.514	20.4107	29.1236	46.5065	65.9697	54.3562	34.944	28.2007	39.1288
NM_000373.4	73.0516	80.1681	96.7679	103.941	95.9478	99.6158	62.0087	68.8379	94.4081	108.326	84.6022	58.6932
NM_000374.5	71.2404	58.431	53.7599	55.4152	59.1387	53.9448	108.515	60.2332	74.3821	59.4048	70.5019	88.0399
NM_000380.4	22.9418	19.7429	24.864	28.3067	25.6442	23.4974	20.6696	14.3412	17.1651	13.9776	14.1004	13.0429
NM_000381.4	287.98	246.487	230.832	147.524	139.909	155.877	222.198	186.436	185.955	76.8768	103.403	114.126
NM_000382.3	54.3359	53.246	66.8639	78.1804	75.3626	82.4064	41.3391	17.2095	14.3043	59.4048	32.9009	29.3466
NM_000386.4	124.369	125.836	119.28	120.416	107.81	113.185	103.348	97.5204	88.6864	97.8432	94.0025	101.083
NM_000387.6	10.2634	13.9596	10.416	17.8227	15.7006	17.2094	0	8.60474	17.1651	13.9776	0	16.3037
NM_000389.5	50.1097	30.9106	35.28	40.5879	43.2637	40.7068	108.515	103.257	94.4081	129.293	131.603	159.776
NM_000390.4	39.2426	31.9077	39.9839	34.8966	25.4698	22.1736	25.8369	22.946	28.6085	24.4608	14.1004	19.5644
NM_000391.4	49.506	51.0523	43.0079	48.975	58.6154	54.6067	93.013	45.892	57.217	62.8992	98.7026	65.2147
NM_000393.5	779.418	657.698	781.871	746.757	835.095	678.115	1260.84	978.072	1347.46	1754.19	1682.64	955.396
NM_000398.7	117.728	135.408	137.76	126.407	128.919	137.675	149.854	131.939	105.852	111.821	145.704	101.083
NM_000399.5	24.1493	24.9279	26.544	7.48854	8.89698	10.2594	51.6739	37.2872	31.4694	6.9888	18.8005	9.78221
NM_000400.4	39.8463	40.6823	36.96	35.945	41.1703	41.3687	67.1761	48.7602	68.6604	48.9216	37.601	68.4754
NM_000404.4	62.7881	67.6045	61.4879	83.1228	84.4341	80.7517	31.0043	51.6284	54.3562	80.3712	89.3024	78.2577
NM_000405.5	23.5455	31.5089	27.216	32.7998	38.3791	38.3901	31.0043	17.2095	20.026	13.9776	32.9009	35.8681
NM_000408.5	72.4478	79.3704	74.9279	83.8716	78.6772	74.1327	98.1804	57.3649	74.3821	94.3488	47.0012	74.9969
NM_000414.4	274.698	243.296	242.928	246.972	265.863	250.198	242.867	243.801	271.781	167.731	220.906	241.294
NM_000416.3	74.8628	68.4022	74.5919	96.3026	92.8077	80.4207	67.1761	31.5507	62.9387	108.326	103.403	65.2147
NM_000426.4	138.858	152.16	146.496	222.559	222.076	188.31	77.5108	83.1792	102.991	150.259	145.704	107.604
NM_000430.4	304.885	297.34	322.224	234.99	216.144	252.845	263.537	240.933	194.538	136.282	188.005	224.991
NM_000431.4	56.7508	37.0927	51.4079	21.2675	20.4107	23.4974	72.3435	77.4427	62.9387	24.4608	51.7014	29.3466
NM_000434.4	53.7321	51.4512	50.3999	33.0993	39.0769	40.3758	62.0087	51.6284	71.5213	20.9664	32.9009	22.8251
NM_000435.3	448.573	407.222	395.807	223.608	248.941	250.198	1477.87	1150.17	1258.77	590.554	498.213	629.322
NM_000436.4	70.6366	76.3791	81.3119	91.2104	89.3187	81.4136	77.5108	71.7062	74.3821	101.338	37.601	81.5184
NM_000454.5	223.381	207.998	238.896	196.35	206.724	221.074	180.859	189.304	148.764	115.315	112.803	198.905
NM_000455.5	12.0746	8.77462	11.088	10.1844	8.89698	11.5832	56.8413	31.5507	22.8868	34.944	51.7014	52.1718
NM_000465.4	71.2404	86.1508	86.3519	105.738	104.496	112.854	87.8456	51.6284	80.1039	76.8768	89.3024	97.8221
NM_000466.3	37.4314	42.4771	51.4079	66.0489	69.2569	53.2829	51.6739	28.6825	42.9128	87.36	70.5019	101.083
NM_000476.3	12.6784	11.1677	19.824	12.7305	13.6071	9.92848	0	11.473	5.7217	10.4832	4.70012	3.26074
NM_000484.4	1291.38	1380.01	1417.25	1461.16	1497.31	1473.06	1085.15	969.468	1072.82	1097.24	930.625	1173.86
NM_000485.3	23.5455	26.1244	25.536	17.673	20.4107	21.1808	51.6739	37.2872	17.1651	38.4384	47.0012	42.3896
NM_000489.6	283.754	307.112	329.952	364.243	403.155	334.59	289.374	301.166	291.807	297.024	347.809	273.902
NM_000516.7	1020.91	891.222	1016.73	867.323	977.272	1057.05	573.58	585.122	546.423	447.283	592.216	557.586
NM_000520.6	80.2963	76.3791	74.9279	108.734	94.5522	95.6444	93.013	83.1792	91.5473	129.293	145.704	127.169
NM_000521.4	102.031	118.457	113.904	131.349	134.327	144.625	41.3391	45.892	42.9128	73.3824	94.0025	88.0399
NM_000527.5	457.025	330.644	344.4	106.637	104.321	102.925	532.241	504.812	560.727	227.136	178.605	169.558
NM_000528.4	53.7321	47.0639	52.4159	32.0509	32.9712	38.0592	67.1761	65.9697	60.0779	34.944	47.0012	48.911
NM_000532.5	103.842	119.255	120.288	148.273	162.239	147.273	134.352	131.939	105.852	153.754	155.104	127.169
NM_000533.5	9.65971	17.1504	17.808	6.1406	9.59478	10.5904	31.0043	34.419	25.7477	10.4832	4.70012	3.26074
NM_000534.5	68.2217	78.5727	68.8799	62.4544	70.1291	64.5351	67.1761	83.1792	82.9647	48.9216	108.103	58.6932
NM_000535.7	24.1493	27.9193	28.896	47.3276	44.6593	56.9233	20.6696	43.0237	31.4694	48.9216	75.202	48.911
NM_000543.5	22.9418	17.5492	19.488	29.2053	30.7033	34.4187	10.3348	20.0777	20.026	27.9552	14.1004	26.0859
NM_000546.6	113.502	97.1191	92.7359	107.386	106.589	114.839	93.013	74.5744	102.991	90.8544	112.803	88.0399
NM_000548.5	57.3545	62.0206	73.9199	62.0051	63.6745	55.2686	175.691	134.808	171.651	136.282	112.803	123.908
NM_000551.4	19.9232	14.3585	18.816	16.9241	20.9341	26.476	10.3348	8.60474	2.86085	6.9888	0	16.3037
NM_000553.6	61.5807	62.8183	60.8159	63.353	58.4409	59.24	67.1761	86.0474	42.9128	97.8432	84.6022	52.1718
NM_000581.4	52.5247	44.6708	53.0879	51.5212	47.4506	50.3043	72.3435	60.2332	74.3821	59.4048	79.9021	97.8221
NM_000597.3	282.547	311.499	304.416	254.161	277.202	307.452	439.228	458.92	409.102	415.834	352.509	518.457
NM_000598.5	51.3172	56.8356	60.4799	43.2838	42.7404	52.621	77.5108	43.0237	51.4953	55.9104	37.601	58.6932
NM_000599.4	79.6926	72.9889	75.2639	75.6342	79.375	75.4565	144.687	97.5204	102.991	122.304	122.203	104.344
NM_000602.5	196.213	163.926	174.384	74.4361	55.4753	62.8804	258.369	183.568	214.564	76.8768	28.2007	48.911
NM_000610.4	123.161	114.469	98.7839	133.596	130.14	126.423	67.1761	77.4427	97.269	62.8992	51.7014	71.7362
NM_000611.6	74.259	65.6102	57.4559	69.4936	61.5811	75.1255	15.5022	45.892	60.0779	59.4048	61.1016	45.6503
NM_000617.3	47.0911	57.8327	50.0639	50.323	48.6717	42.0306	36.1717	43.0237	62.9387	48.9216	42.3011	35.8681
NM_000629.3	75.4665	87.3474	76.9439	92.109	94.7267	85.7159	25.8369	17.2095	25.7477	41.9328	37.601	29.3466
NM_000636.4	57.3545	64.6131	65.8559	61.5558	59.3132	71.4851	56.8413	37.2872	42.9128	55.9104	42.3011	97.8221
NM_000637.5	90.5598	105.694	113.232	111.879	109.032	126.754	20.6696	48.7602	40.0519	59.4048	61.1016	35.8681
NM_000640.3	22.9418	18.7458	17.472	33.5487	30.8778	35.0806	10.3348	22.946	20.026	6.9888	28.2007	35.8681
NM_000642.3	89.3523	88.1451	89.0399	88.8141	93.1566	89.3564	67.1761	114.73	82.9647	115.315	98.7026	81.5184
NM_000660.7	17.5082	15.7544	16.8	6.44014	8.72253	7.61184	25.8369	20.0777	40.0519	3.4944	9.40025	6.52147
NM_000661.5	1521.4	1363.86	1398.09	1452.03	1443.06	1311.22	1508.88	1339.47	1393.23	1352.33	1175.03	903.224
NM_000666.3	10.8672	11.3671	13.104	9.58533	12.5604	8.93564	10.3348	5.73649	8.58256	10.4832	28.2007	16.3037
NM_000671.4	399.067	417.592	397.151	499.635	477.82	474.582	521.906	456.051	431.989	429.811	474.713	397.81
NM_000687.4	220.966	201.417	188.832	171.038	182.999	194.598	480.567	413.028	431.989	499.699	498.213	410.853
NM_000688.6	63.9956	52.2489	57.1199	51.5212	49.0206	55.2686	93.013	63.1014	51.4953	34.944	61.1016	26.0859
NM_000690.4	45.8836	36.295	44.6879	35.3459	30.7033	34.0878	41.3391	54.4967	31.4694	31.4496	23.5006	26.0859
NM_000692.5	23.5455	31.3094	34.608	41.786	43.6126	49.9734	51.6739	51.6284	42.9128	90.8544	37.601	84.7791
NM_000696.4	79.6926	89.9399	80.6399	109.932	105.368	99.6158	77.5108	74.5744	85.8256	80.3712	103.403	97.8221
NM_000700.3	370.691	368.534	343.728	562.539	562.08	555.995	423.726	470.393	486.345	440.294	606.316	534.761
NM_000701.8	655.653	627.984	639.743	616.457	675.298	685.065	403.056	421.632	480.623	363.418	394.81	388.028
NM_000709.4	19.3194	16.5521	18.48	13.4794	10.467	14.8927	10.3348	14.3412	20.026	13.9776	9.40025	13.0429
NM_000712.4	34.4127	32.1071	33.936	41.3367	36.1113	35.0806	67.1761	43.0237	74.3821	66.3936	42.3011	35.8681
NM_000713.3	15.697	10.37	12.768	10.1844	15.0027	10.2594	10.3348	17.2095	11.4434	10.4832	23.5006	39.1288
NM_000722.4	45.2799	49.6564	45.3599	82.0744	75.1882	61.2257	15.5022	17.2095	25.7477	34.944	18.8005	26.0859
NM_000754.4	38.0351	37.2921	25.2	27.8574	32.7967	30.1164	113.683	63.1014	85.8256	83.8656	32.9009	68.4754
NM_000755.5	14.4896	22.7342	22.848	17.2236	17.4451	19.1951	36.1717	17.2095	20.026	24.4608	51.7014	26.0859
NM_000757.6	10.2634	11.1677	10.752	11.9817	13.4327	14.5618	20.6696	5.73649	0	13.9776	14.1004	19.5644
NM_000783.4	22.3381	12.1648	16.128	7.33877	8.54808	11.5832	10.3348	28.6825	17.1651	6.9888	23.5006	22.8251
NM_000786.4	1192.97	1055.55	1003.63	732.08	719.783	715.513	744.104	823.187	821.064	387.878	427.711	394.549
NM_000788.3	77.2777	81.9629	89.3759	95.5538	94.9011	84.0612	56.8413	77.4427	77.243	125.798	56.4015	61.954
NM_000791.4	246.926	237.513	247.632	310.774	299.881	303.812	315.211	289.693	314.694	328.474	366.61	264.12
NM_000801.5	70.0329	65.2114	70.2239	60.6572	68.908	76.4493	56.8413	74.5744	94.4081	66.3936	94.0025	107.604
NM_000819.5	282.547	264.236	293.664	322.007	343.668	286.933	377.219	378.609	449.154	464.755	521.714	299.988
NM_000821.7	56.7508	54.642	54.0959	46.7285	51.8118	46.6639	93.013	45.892	57.217	73.3824	37.601	55.4325
NM_000824.5	16.9045	14.159	14.112	14.6775	12.386	14.2308	5.16739	14.3412	8.58256	17.472	9.40025	6.52147
NM_000827.4	294.621	258.652	275.184	305.532	285.75	291.897	289.374	235.196	268.92	272.563	230.306	260.859
NM_000829.4	70.6366	73.7866	91.7279	100.946	89.842	99.9467	72.3435	65.9697	60.0779	59.4048	61.1016	45.6503
NM_000834.5	24.753	21.1389	22.512	21.567	18.1429	20.1879	56.8413	68.8379	45.7736	73.3824	84.6022	88.0399
NM_000840.3	3.62239	14.159	11.424	18.4218	23.8997	27.4688	5.16739	11.473	17.1651	17.472	18.8005	6.52147
NM_000848.4	33.809	30.3123	34.944	33.998	34.7157	26.145	31.0043	40.1555	17.1651	17.472	18.8005	29.3466
NM_000849.5	26.5642	21.7371	23.52	28.756	20.9341	26.145	20.6696	14.3412	31.4694	13.9776	32.9009	29.3466
NM_000850.5	18.7157	15.555	19.152	18.5716	20.4107	16.5475	25.8369	14.3412	14.3043	13.9776	28.2007	16.3037
NM_000852.4	437.102	404.031	370.272	300.59	312.964	352.13	475.4	444.578	575.031	464.755	427.711	443.46
NM_000855.3	33.809	28.9164	27.888	54.3668	46.0549	43.6853	36.1717	40.1555	60.0779	52.416	84.6022	42.3896
NM_000857.5	7.24478	11.766	11.088	10.1844	7.85028	10.2594	5.16739	8.60474	2.86085	3.4944	14.1004	6.52147
NM_000858.7	14.4896	12.5637	12.432	13.1798	20.0618	17.5403	25.8369	22.946	20.026	31.4496	14.1004	26.0859
NM_000859.3	2855.65	2514.13	2458.51	1647.03	1536.91	1559.1	2594.03	2635.92	2440.31	1205.57	1212.63	1421.68
NM_000875.5	246.323	177.886	164.976	141.833	141.828	148.265	480.567	329.848	328.998	272.563	277.307	234.773
NM_000876.4	533.699	536.249	556.079	701.077	733.739	679.108	273.872	349.926	306.111	527.655	408.911	489.11
NM_000884.3	336.882	307.311	303.744	297.744	286.448	267.076	206.696	220.855	234.59	171.226	131.603	192.383
NM_000885.6	44.0724	53.8443	47.3759	60.2079	63.5	59.24	10.3348	34.419	17.1651	41.9328	32.9009	29.3466
NM_000891.3	36.8276	22.3354	32.256	29.2053	24.5975	25.1522	46.5065	25.8142	40.0519	20.9664	23.5006	19.5644
NM_000895.3	155.763	158.741	144.144	180.324	177.416	189.965	217.03	238.065	217.425	234.125	206.805	163.037
NM_000901.5	15.0933	22.136	18.144	15.2766	18.1429	18.2022	20.6696	22.946	28.6085	24.4608	47.0012	9.78221
NM_000903.3	226.399	244.892	262.752	287.859	279.644	286.602	227.365	298.298	271.781	251.597	244.406	293.466
NM_000904.6	14.4896	18.3469	12.432	18.5716	16.7473	21.5117	5.16739	11.473	8.58256	3.4944	9.40025	16.3037
NM_000918.4	476.344	461.864	470.063	469.831	482.007	472.927	449.563	395.818	386.215	342.451	385.41	436.939
NM_000921.5	134.632	134.411	125.664	122.363	117.754	101.271	160.189	157.754	171.651	174.72	145.704	127.169
NM_000922.4	20.5269	13.7602	19.488	22.4656	17.6195	15.2237	0	17.2095	11.4434	17.472	28.2007	6.52147
NM_000925.4	114.709	126.634	129.024	141.234	128.919	124.768	108.515	83.1792	137.321	76.8768	98.7026	61.954
NM_000930.5	274.094	242.299	255.696	173.285	175.497	169.777	423.726	361.399	357.606	248.102	206.805	202.166
NM_000932.5	26.5642	24.9279	33.6	24.5624	26.6909	27.7998	72.3435	65.9697	68.6604	55.9104	70.5019	35.8681
NM_000938.3	484.797	469.642	447.215	524.647	497.533	422.622	542.576	461.788	414.824	461.261	437.112	381.506
NM_000941.3	68.2217	54.0437	55.1039	51.2216	60.5343	57.5852	87.8456	83.1792	80.1039	73.3824	61.1016	74.9969
NM_000942.5	500.494	442.72	476.447	477.469	439.79	466.308	382.387	358.531	377.632	377.395	319.608	335.856
NM_000944.5	15.697	18.9452	17.808	17.5232	18.1429	20.5189	10.3348	8.60474	5.7217	0	14.1004	9.78221
NM_000945.4	158.178	128.628	132.048	104.54	102.054	88.6945	77.5108	143.412	120.156	45.4272	61.1016	78.2577
NM_000946.3	62.1844	72.5901	69.8879	120.715	112.695	97.2991	41.3391	51.6284	80.1039	115.315	117.503	84.7791
NM_000947.5	73.0516	91.1364	84.6719	94.8049	100.309	89.6873	108.515	166.358	94.4081	83.8656	79.9021	120.647
NM_000964.4	17.5082	21.1389	20.832	6.88946	8.37363	7.61184	20.6696	22.946	40.0519	17.472	18.8005	22.8251
NM_000967.4	1387.38	1168.02	1231.77	1035.52	1097.29	1121.26	1452.04	1150.17	1201.56	1118.21	1123.33	1310.82
NM_000968.4	1988.09	1850.05	1886.64	1880.52	1804.17	1806.65	1462.37	1259.16	1602.08	1202.07	1311.33	1496.68
NM_000969.5	1931.34	1679.34	1669.92	1824.21	1571.63	1572.01	1942.94	1792.65	2234.33	1789.13	1734.35	1542.33
NM_000970.6	1700.71	1665.98	1572.14	1576.04	1490.85	1562.08	1674.23	1632.03	1481.92	1069.29	1297.23	1310.82
NM_000971.4	1956.09	1816.55	1765.01	1765.5	1521.03	1815.92	1198.83	1471.41	1356.04	915.533	1001.13	1252.12
NM_000972.3	1641.55	1322.97	1445.81	1192.77	1102.88	1082.2	1116.16	1041.17	1175.81	758.285	686.218	857.573
NM_000975.5	1122.94	1019.45	1035.21	1069.21	1074.96	898.528	837.117	783.031	818.204	485.722	512.314	639.104
NM_000976.4	481.778	398.448	425.375	415.464	420.251	392.175	335.88	332.717	406.241	241.114	249.107	303.248
NM_000977.4	443.139	368.135	411.935	294.449	365.648	329.957	490.902	324.112	331.859	286.541	366.61	374.985
NM_000978.4	951.481	775.956	817.151	824.338	752.056	710.879	578.748	533.494	640.831	478.733	423.011	534.761
NM_000979.4	556.037	462.263	470.399	344.473	384.315	372.98	449.563	335.585	340.441	209.664	338.409	313.031
NM_000980.4	478.156	397.251	412.607	292.652	314.185	293.883	501.237	349.926	443.432	262.08	324.309	326.074
NM_000981.4	69.4292	54.4425	57.1199	44.9312	45.1827	50.9662	129.185	143.412	125.877	59.4048	103.403	130.429
NM_000982.4	781.229	634.365	725.759	764.879	734.437	580.154	609.752	539.23	652.274	538.138	639.217	538.021
NM_000983.4	522.832	505.937	554.063	559.693	548.124	419.975	537.409	461.788	537.84	520.666	437.112	365.202
NM_000984.6	398.463	356.369	341.712	209.529	233.938	332.604	351.382	453.183	354.746	104.832	211.506	313.031
NM_000986.4	816.849	690.204	739.535	717.552	768.804	698.303	511.572	513.416	580.753	394.867	371.31	358.681
NM_000987.5	789.681	661.088	743.231	658.991	655.236	602.659	372.052	415.896	383.354	349.44	338.409	309.77
NM_000988.5	827.716	812.65	783.215	787.645	799.333	822.74	1188.5	972.336	1027.05	1191.59	1311.33	730.405
NM_000989.4	743.798	778.149	772.463	680.259	685.416	741.327	268.704	275.352	351.885	167.731	310.208	286.945
NM_000990.5	865.752	710.944	769.439	601.479	618.253	629.797	377.219	286.825	371.911	283.046	338.409	296.727
NM_000991.5	283.754	230.932	246.288	149.471	173.578	179.375	356.55	255.274	294.668	171.226	145.704	264.12
NM_000992.3	441.932	378.505	402.191	374.277	376.988	368.678	242.867	286.825	288.946	255.091	239.706	280.423
NM_000993.5	794.511	725.901	725.759	618.404	686.986	704.591	537.409	504.812	512.092	230.63	361.91	407.592
NM_000994.4	818.66	733.479	747.935	605.523	540.273	636.416	594.25	633.883	517.814	356.429	286.708	521.718
NM_000996.4	953.293	845.554	858.815	895.18	969.596	787.66	713.1	719.93	712.352	566.093	728.519	635.843
NM_000997.5	659.275	512.717	582.623	503.08	387.978	451.746	428.893	272.483	417.684	202.675	314.908	326.074
NM_000998.5	727.497	519.896	645.455	444.22	466.655	440.494	511.572	415.896	509.232	209.664	352.509	244.555
NM_000999.4	480.571	458.474	446.879	437.78	387.978	455.717	971.469	567.913	823.925	803.712	878.923	573.889
NM_001000.4	361.032	317.282	325.248	400.038	344.365	296.2	418.559	341.321	271.781	370.406	310.208	273.902
NM_001001.5	126.18	111.278	129.024	113.976	107.287	113.847	56.8413	57.3649	60.0779	45.4272	51.7014	97.8221
NM_001001330.3	99.012	101.506	107.52	142.582	123.685	116.825	51.6739	57.3649	97.269	66.3936	79.9021	55.4325
NM_001001410.3	16.3008	11.3671	15.792	11.3826	14.3049	13.5689	31.0043	22.946	40.0519	24.4608	28.2007	32.6074
NM_001001415.4	11.4709	8.77462	12.768	25.1615	20.5852	24.1593	0	2.86825	2.86085	20.9664	18.8005	22.8251
NM_001001433.3	20.5269	19.1446	19.488	15.1268	12.2115	16.2165	20.6696	25.8142	25.7477	38.4384	28.2007	13.0429
NM_001001436.4	17.5082	28.7169	17.136	14.2282	9.94368	13.5689	10.3348	14.3412	14.3043	10.4832	0	3.26074
NM_001001520.3	115.917	98.7145	97.7759	70.3923	71.0014	92.6659	93.013	97.5204	91.5473	73.3824	47.0012	133.69
NM_001001563.5	68.2217	68.4022	65.8559	53.4682	52.5096	74.7946	87.8456	74.5744	65.7996	52.416	47.0012	81.5184
NM_001001660.3	9.05598	10.9683	9.74399	16.4748	14.3049	14.8927	5.16739	8.60474	17.1651	10.4832	9.40025	13.0429
NM_001001664.3	15.697	10.37	11.76	8.38716	5.58242	8.27374	20.6696	11.473	14.3043	17.472	4.70012	3.26074
NM_001001701.4	13.8858	17.7487	15.12	14.2282	13.4327	11.2523	5.16739	11.473	8.58256	0	9.40025	3.26074
NM_001001790.3	33.809	38.0898	35.616	31.6016	34.5412	42.6925	5.16739	11.473	28.6085	6.9888	18.8005	13.0429
NM_001001852.4	17.5082	10.5694	12.432	9.58533	10.2926	7.61184	51.6739	37.2872	31.4694	17.472	37.601	16.3037
NM_001001872.4	60.3732	56.0379	60.8159	54.0673	55.3008	52.621	46.5065	14.3412	34.3302	10.4832	9.40025	13.0429
NM_001001973.3	346.542	400.841	386.064	435.833	443.802	431.227	315.211	347.058	300.389	349.44	465.312	290.205
NM_001001976.3	35.6202	44.6708	41.6639	28.9058	26.1676	25.8141	5.16739	20.0777	34.3302	24.4608	14.1004	22.8251
NM_001001995.3	497.475	448.104	473.759	505.177	486.543	477.56	470.232	418.764	369.05	405.35	305.508	384.767
NM_001001998.3	181.12	158.94	171.024	151.568	160.669	166.468	186.026	215.119	171.651	136.282	150.404	169.558
NM_001002.4	1016.68	890.026	933.071	1102.01	1061.01	1032.56	1167.83	1049.78	1218.72	1404.75	1184.43	1330.38
NM_001002002.3	35.6202	40.4829	50.3999	41.786	42.5659	45.3401	10.3348	31.5507	48.6345	41.9328	42.3011	52.1718
NM_001002010.5	54.3359	54.8414	54.0959	67.8462	58.9643	51.9591	25.8369	31.5507	31.4694	55.9104	47.0012	45.6503
NM_001002030.2	131.01	98.3156	121.632	122.812	119.15	100.278	67.1761	48.7602	68.6604	62.8992	79.9021	48.911
NM_001002248.3	50.1097	50.4541	58.1279	77.8808	79.5495	55.2686	98.1804	63.1014	62.9387	87.36	103.403	81.5184
NM_001002257.3	31.3941	32.7054	25.2	32.5003	26.1676	32.764	20.6696	31.5507	31.4694	34.944	28.2007	26.0859
NM_001002296.2	42.865	44.6708	37.296	52.1202	49.544	44.6782	20.6696	20.0777	25.7477	13.9776	28.2007	26.0859
NM_001002755.4	53.7321	69.7981	67.1999	69.3439	64.1978	59.5709	36.1717	20.0777	34.3302	17.472	18.8005	26.0859
NM_001002759.2	10.8672	17.7487	13.776	28.756	31.2267	33.0949	10.3348	28.6825	14.3043	17.472	32.9009	26.0859
NM_001002800.3	696.103	731.883	689.471	679.66	806.834	627.811	635.589	803.109	746.682	744.307	855.423	544.543
NM_001002836.4	10.2634	13.5608	8.39999	9.7351	9.07143	9.92848	25.8369	31.5507	37.1911	13.9776	14.1004	16.3037
NM_001002847.4	36.2239	33.1043	34.944	47.1778	55.8242	58.909	51.6739	131.939	102.991	223.642	155.104	189.123
NM_001002860.4	39.8463	40.0841	43.3439	28.4564	19.5385	23.4974	87.8456	63.1014	34.3302	62.8992	32.9009	32.6074
NM_001002909.4	64.5993	66.8068	70.2239	49.7239	55.4753	69.1684	67.1761	91.7839	71.5213	97.8432	61.1016	107.604
NM_001002926.2	27.7717	24.7285	25.2	45.081	38.0302	38.0592	20.6696	8.60474	20.026	13.9776	14.1004	22.8251
NM_001003.3	434.083	335.43	365.568	420.257	443.628	332.935	857.787	499.075	740.961	831.667	822.522	433.678
NM_001003681.3	39.2426	40.2835	33.6	46.1294	38.2047	44.0163	51.6739	63.1014	25.7477	52.416	51.7014	78.2577
NM_001003692.2	10.2634	12.1648	13.44	13.7789	11.8626	11.9142	15.5022	11.473	20.026	3.4944	4.70012	13.0429
NM_001003694.2	25.3567	21.5377	25.872	23.8136	22.1552	26.476	72.3435	48.7602	57.217	62.8992	56.4015	45.6503
NM_001003699.4	14.4896	17.9481	15.792	15.2766	15.875	17.2094	46.5065	57.3649	48.6345	66.3936	18.8005	32.6074
NM_001003703.2	168.441	181.675	186.144	252.663	269.352	204.858	103.348	172.095	180.234	157.248	173.905	149.994
NM_001003722.2	22.3381	41.6795	32.928	41.786	36.1113	38.0592	31.0043	48.7602	57.217	41.9328	94.0025	42.3896
NM_001003787.4	30.1866	27.9193	28.224	31.6016	32.0989	36.4044	36.1717	48.7602	37.1911	38.4384	18.8005	45.6503
NM_001003795.3	31.9978	28.3181	36.624	21.4172	22.1552	30.7783	20.6696	25.8142	20.026	20.9664	28.2007	22.8251
NM_001003796.2	68.8254	85.3531	81.9839	72.0397	70.6525	80.0898	41.3391	97.5204	80.1039	73.3824	61.1016	58.6932
NM_001003800.2	59.7695	57.035	46.3679	29.5048	34.1923	34.4187	98.1804	83.1792	57.217	66.3936	42.3011	58.6932
NM_001003801.2	15.0933	20.5406	24.864	28.0071	24.0742	29.4545	62.0087	43.0237	45.7736	45.4272	28.2007	32.6074
NM_001003891.3	64.5993	62.22	57.1199	32.0509	40.4725	41.3687	98.1804	152.017	114.434	59.4048	75.202	110.865
NM_001003897.2	19.3194	12.7631	12.768	13.9287	13.7816	11.5832	5.16739	11.473	14.3043	0	9.40025	6.52147
NM_001004.4	535.51	404.031	446.879	348.367	367.567	316.719	516.739	415.896	500.649	436.8	399.511	345.638
NM_001004019.2	3.62239	13.3614	12.096	11.8319	9.94368	13.8999	15.5022	17.2095	14.3043	20.9664	18.8005	35.8681
NM_001004051.4	39.2426	42.6766	42.3359	70.0927	75.7115	54.9376	72.3435	40.1555	68.6604	150.259	98.7026	101.083
NM_001004067.4	305.488	238.311	294.336	259.703	312.79	336.245	186.026	183.568	174.512	132.787	183.305	211.948
NM_001004106.3	6.03732	9.37289	15.12	14.6775	14.8283	15.2237	56.8413	31.5507	37.1911	31.4496	32.9009	19.5644
NM_001004127.3	45.2799	52.2489	44.6879	53.7677	51.9863	41.3687	51.6739	40.1555	48.6345	41.9328	47.0012	55.4325
NM_001004304.4	13.2821	11.1677	13.776	10.3342	10.9904	9.59753	5.16739	17.2095	17.1651	13.9776	14.1004	3.26074
NM_001004333.5	72.4478	97.7174	80.9759	97.351	94.7267	89.6873	62.0087	71.7062	57.217	34.944	61.1016	84.7791
NM_001004356.3	28.3754	20.3412	19.488	13.0301	13.2582	19.857	46.5065	57.3649	40.0519	52.416	47.0012	45.6503
NM_001005.5	949.067	759.603	891.743	640.869	710.014	684.734	1204	849.001	1072.82	698.88	742.62	717.362
NM_001005273.3	106.861	94.726	81.6479	67.0973	82.6896	89.6873	253.202	226.592	183.095	139.776	192.705	185.862
NM_001005361.3	124.972	120.651	113.232	95.2542	98.2157	107.89	149.854	137.676	123.017	101.338	98.7026	97.8221
NM_001005373.4	24.753	25.3267	33.264	23.0647	25.1209	26.8069	41.3391	25.8142	28.6085	48.9216	4.70012	19.5644
NM_001005464.3	652.634	478.017	586.319	326.201	376.115	376.951	831.95	639.619	826.786	506.688	573.415	463.024
NM_001005743.2	22.9418	26.3239	24.528	13.3296	14.4794	17.5403	10.3348	14.3412	14.3043	13.9776	37.601	19.5644
NM_001005751.3	129.199	110.082	123.648	137.34	149.504	144.625	108.515	108.993	114.434	146.765	131.603	123.908
NM_001006.5	1991.71	1628.49	1918.89	1879.47	1909.01	1517.07	1059.31	846.133	1092.85	1111.22	1433.54	893.442
NM_001006605.5	12.6784	12.3642	6.71999	9.28579	8.37363	6.94994	0	5.73649	0	3.4944	9.40025	0
NM_001006617.3	39.8463	43.8731	36.624	50.323	46.2294	57.9162	51.6739	37.2872	42.9128	27.9552	14.1004	45.6503
NM_001006634.3	109.879	85.9514	78.6239	58.2608	59.4876	60.2328	124.017	77.4427	88.6864	48.9216	65.8017	61.954
NM_001006681.2	10.2634	11.5665	16.128	13.6291	17.2706	12.5761	20.6696	5.73649	11.4434	6.9888	14.1004	13.0429
NM_001006935.3	45.2799	52.2489	47.3759	55.7147	49.1951	57.2543	20.6696	17.2095	31.4694	6.9888	23.5006	19.5644
NM_001007.5	1176.07	960.023	1107.12	986.54	946.045	872.052	1297.01	1078.46	1150.06	754.791	817.822	710.84
NM_001007025.2	38.6388	57.6333	52.7519	51.9705	39.0769	44.3472	31.0043	34.419	22.8868	24.4608	14.1004	29.3466
NM_001007157.2	159.385	148.371	159.936	141.983	152.47	159.849	82.6782	126.203	82.9647	111.821	183.305	149.994
NM_001007228.2	44.0724	43.4743	46.0319	44.7815	31.9245	39.383	51.6739	43.0237	60.0779	31.4496	18.8005	32.6074
NM_001007237.3	29.5829	36.4944	35.952	25.1615	31.5756	34.7497	51.6739	28.6825	57.217	38.4384	47.0012	42.3896
NM_001007253.4	9.05598	12.7631	8.39999	16.325	12.5604	15.2237	31.0043	8.60474	14.3043	31.4496	28.2007	22.8251
NM_001007527.2	35.0164	30.3123	28.896	42.5349	35.5879	38.3901	15.5022	25.8142	22.8868	17.472	14.1004	6.52147
NM_001007553.3	741.383	754.617	736.175	854.892	893.536	816.452	707.932	794.504	695.187	649.959	737.92	759.751
NM_001007559.3	141.273	190.449	163.632	117.271	129.442	141.977	155.022	131.939	123.017	136.282	141.004	120.647
NM_001007561.3	15.697	15.3556	16.464	13.3296	11.6882	14.5618	46.5065	51.6284	45.7736	34.944	32.9009	29.3466
NM_001007563.3	188.968	226.944	236.208	175.681	201.839	174.41	294.541	335.585	294.668	164.237	206.805	202.166
NM_001008.4	472.722	403.433	459.983	470.73	461.247	405.082	454.73	387.213	403.38	419.328	427.711	430.417
NM_001008212.2	40.45	29.7141	33.264	57.0627	43.7871	37.0663	31.0043	11.473	20.026	41.9328	47.0012	35.8681
NM_001008216.2	17.5082	16.3527	17.136	17.0739	15.5261	19.1951	20.6696	17.2095	8.58256	20.9664	9.40025	29.3466
NM_001008272.2	58.562	44.272	62.1599	30.4035	30.3544	22.5046	41.3391	37.2872	60.0779	6.9888	42.3011	32.6074
NM_001008388.5	59.1657	68.801	67.5359	57.512	64.8956	61.5566	51.6739	54.4967	57.217	34.944	51.7014	42.3896
NM_001008390.2	63.9956	63.2172	56.4479	50.6225	51.9863	43.0234	5.16739	25.8142	17.1651	10.4832	14.1004	13.0429
NM_001008393.4	10.8672	16.1533	11.424	11.083	9.76923	10.9213	15.5022	11.473	5.7217	0	0	3.26074
NM_001008395.4	26.5642	23.3325	29.904	22.7652	27.2143	15.5546	41.3391	2.86825	28.6085	17.472	37.601	19.5644
NM_001008397.4	42.865	58.0322	60.1439	77.132	75.1882	73.4708	31.0043	34.419	45.7736	24.4608	18.8005	58.6932
NM_001008661.3	97.2008	114.668	112.56	148.872	131.536	142.639	93.013	94.6522	97.269	174.72	225.606	127.169
NM_001008708.4	12.0746	14.9567	17.472	16.6246	16.3984	13.238	5.16739	20.0777	17.1651	10.4832	28.2007	16.3037
NM_001008710.3	27.1679	34.8991	27.216	28.9058	31.5756	30.7783	36.1717	45.892	48.6345	38.4384	37.601	32.6074
NM_001008727.5	80.2963	84.5554	89.7119	147.674	128.919	128.077	56.8413	54.4967	82.9647	104.832	65.8017	74.9969
NM_001008895.4	144.896	147.972	144.144	177.478	158.924	164.813	103.348	108.993	123.017	146.765	192.705	133.69
NM_001008938.4	930.351	852.534	859.823	826.885	1009.02	846.9	868.121	889.157	846.812	754.791	1034.03	769.534
NM_001009.4	830.735	702.169	731.807	586.802	570.279	563.938	738.937	570.781	680.883	443.789	526.414	430.417
NM_001009184.2	95.3896	109.882	92.0639	85.9684	92.9822	104.911	103.348	129.071	97.269	90.8544	89.3024	123.908
NM_001009552.2	169.649	186.66	165.648	183.17	197.478	210.484	98.1804	91.7839	82.9647	118.81	117.503	114.126
NM_001009566.3	345.938	349.788	344.064	333.989	348.901	384.563	196.361	295.429	274.642	216.653	220.906	280.423
NM_001009881.3	127.387	127.83	120.96	100.047	104.147	93.6587	129.185	134.808	97.269	115.315	75.202	94.5613
NM_001009894.3	39.2426	40.8818	32.928	42.2354	33.3201	34.0878	25.8369	17.2095	42.9128	27.9552	37.601	19.5644
NM_001009899.4	9.05598	13.5608	15.12	21.2675	19.7129	24.8212	82.6782	83.1792	57.217	52.416	32.9009	71.7362
NM_001009921.3	68.2217	61.0235	53.4239	79.3785	70.8269	67.8446	87.8456	43.0237	45.7736	125.798	84.6022	88.0399
NM_001009923.2	24.753	26.5233	25.872	17.673	24.0742	31.1092	20.6696	8.60474	0	3.4944	4.70012	16.3037
NM_001009944.3	42.865	46.2662	44.6879	42.0856	36.8091	44.6782	268.704	332.717	366.189	300.518	253.807	202.166
NM_001009984.3	41.6575	42.4771	45.3599	46.7285	46.7528	37.0663	56.8413	45.892	57.217	118.81	94.0025	91.3006
NM_001009993.4	76.6739	91.3358	79.2959	52.1202	54.2541	71.4851	129.185	131.939	108.712	108.326	108.103	120.647
NM_001009996.3	18.112	12.7631	13.776	14.2282	16.7473	15.5546	31.0043	43.0237	28.6085	55.9104	56.4015	42.3896
NM_001009999.3	397.256	407.82	382.032	446.616	444.326	438.177	253.202	338.453	328.998	419.328	404.211	335.856
NM_001010.3	1384.96	1166.63	1349.71	1221.23	1235.11	1100.74	697.598	696.984	803.899	517.171	681.518	893.442
NM_001010851.3	9.65971	15.7544	11.424	41.3367	41.6937	39.383	15.5022	2.86825	11.4434	10.4832	28.2007	32.6074
NM_001010853.3	42.2612	36.0956	42.3359	22.0163	23.5508	20.5189	10.3348	31.5507	14.3043	31.4496	14.1004	29.3466
NM_001010854.2	10.2634	13.1619	9.07199	11.083	15.5261	17.2094	31.0043	11.473	40.0519	27.9552	37.601	26.0859
NM_001010858.3	15.697	12.7631	11.76	9.13602	6.45467	10.5904	56.8413	17.2095	14.3043	3.4944	9.40025	13.0429
NM_001010883.3	12.0746	12.5637	13.776	15.2766	10.1181	16.2165	10.3348	11.473	11.4434	10.4832	14.1004	6.52147
NM_001010924.2	25.3567	26.7227	27.888	28.756	32.9712	31.7711	56.8413	60.2332	71.5213	52.416	61.1016	48.911
NM_001010942.3	178.101	198.426	163.632	209.23	210.911	230.341	98.1804	143.412	74.3821	108.326	112.803	120.647
NM_001010982.5	22.9418	12.9625	12.768	14.6775	19.7129	15.8856	5.16739	2.86825	5.7217	20.9664	4.70012	9.78221
NM_001011.4	1109.06	992.33	1048.32	882.449	854.11	920.701	1038.65	1167.38	929.777	978.432	1137.43	821.705
NM_001011551.3	56.1471	61.2229	57.7919	73.6872	77.9794	70.8232	72.3435	74.5744	102.991	111.821	112.803	110.865
NM_001011658.4	23.5455	17.5492	21.168	29.5048	31.9245	21.8427	20.6696	17.2095	20.026	20.9664	14.1004	19.5644
NM_001011663.2	19.3194	21.7371	20.496	32.0509	27.5632	28.1307	0	20.0777	8.58256	10.4832	18.8005	16.3037
NM_001011713.3	7.24478	10.5694	14.448	17.9725	12.386	15.2237	5.16739	2.86825	2.86085	17.472	4.70012	0
NM_001012.2	831.339	739.262	772.463	631.434	610.926	647.337	542.576	478.997	492.067	300.518	296.108	449.982
NM_001012339.3	62.1844	54.4425	57.1199	68.4452	59.3132	69.8303	20.6696	20.0777	22.8868	34.944	23.5006	29.3466
NM_001012426.2	51.9209	40.0841	37.632	38.6409	35.7624	40.0449	160.189	94.6522	137.321	108.326	65.8017	195.644
NM_001012507.4	35.6202	25.7256	35.952	37.2929	34.7157	29.1236	15.5022	14.3412	22.8868	24.4608	56.4015	13.0429
NM_001012614.2	40.45	49.6564	48.3839	37.1432	44.136	42.3615	118.85	103.257	85.8256	101.338	70.5019	94.5613
NM_001012750.3	62.1844	68.6016	66.8639	50.7723	44.6593	58.5781	36.1717	37.2872	42.9128	13.9776	37.601	35.8681
NM_001012754.4	20.5269	16.1533	14.784	20.8181	19.0151	20.1879	10.3348	22.946	8.58256	24.4608	18.8005	9.78221
NM_001012759.3	15.0933	9.97116	12.768	6.44014	7.15247	11.9142	20.6696	14.3412	14.3043	6.9888	9.40025	9.78221
NM_001012967.3	9.65971	17.3498	13.776	16.1752	16.7473	17.5403	31.0043	20.0777	11.4434	17.472	32.9009	22.8251
NM_001012968.3	39.8463	45.4685	50.3999	52.5695	50.4162	52.29	25.8369	68.8379	34.3302	31.4496	42.3011	61.954
NM_001012981.5	21.1306	20.5406	18.144	32.3505	28.7843	32.433	15.5022	17.2095	17.1651	41.9328	18.8005	19.5644
NM_001012991.3	35.0164	50.8529	49.0559	54.0673	63.8489	57.9162	41.3391	40.1555	42.9128	69.888	28.2007	32.6074
NM_001012994.2	21.7343	23.7314	24.192	16.6246	16.2239	13.238	5.16739	31.5507	2.86085	6.9888	23.5006	16.3037
NM_001013.4	377.936	354.973	349.44	228.4	241.963	296.531	392.722	404.423	420.545	220.147	324.309	293.466
NM_001013251.3	182.327	200.62	200.592	271.235	273.887	270.717	366.885	289.693	311.833	380.89	380.71	374.985
NM_001013437.2	105.653	124.041	128.352	131.798	109.381	123.113	77.5108	63.1014	51.4953	48.9216	75.202	65.2147
NM_001013620.4	33.809	41.48	33.936	54.9659	55.6497	58.5781	20.6696	34.419	51.4953	41.9328	56.4015	48.911
NM_001013627.3	12.6784	26.1244	23.52	22.3158	26.6909	30.4474	31.0043	51.6284	31.4694	20.9664	51.7014	61.954
NM_001013663.2	14.4896	14.159	15.12	9.7351	11.6882	15.2237	10.3348	14.3412	5.7217	6.9888	9.40025	0
NM_001013694.3	19.3194	18.3469	14.112	15.8757	15.875	17.2094	10.3348	8.60474	25.7477	20.9664	4.70012	13.0429
NM_001013703.4	71.8441	69.0004	61.4879	114.125	108.857	112.854	103.348	63.1014	71.5213	97.8432	155.104	130.429
NM_001013836.2	22.3381	16.3527	19.824	16.7743	19.0151	22.5046	20.6696	17.2095	28.6085	17.472	9.40025	32.6074
NM_001013839.4	116.52	100.509	120.624	99.4478	103.449	105.904	160.189	149.149	157.347	122.304	126.903	156.515
NM_001014.5	875.411	671.857	746.591	697.033	633.779	589.09	966.302	696.984	869.699	545.127	502.913	544.543
NM_001014286.3	84.5225	117.261	109.872	137.19	132.234	138.999	103.348	86.0474	100.13	83.8656	126.903	120.647
NM_001014436.3	59.7695	67.8039	75.5999	71.1411	68.7335	61.8876	82.6782	94.6522	102.991	129.293	79.9021	110.865
NM_001014437.3	142.481	135.608	137.088	154.414	169.566	158.194	180.859	197.909	143.043	129.293	150.404	127.169
NM_001014446.3	18.7157	24.1302	26.544	27.5578	27.9121	27.7998	5.16739	31.5507	17.1651	17.472	4.70012	13.0429
NM_001014809.3	309.111	287.967	287.616	263.597	262.199	290.905	232.533	226.592	226.007	223.642	178.605	260.859
NM_001014840.2	126.784	121.848	139.44	114.425	103.973	99.2848	103.348	117.598	131.599	66.3936	70.5019	81.5184
NM_001015.5	943.633	758.805	782.543	529.14	497.533	611.264	558.078	565.045	492.067	223.642	192.705	401.07
NM_001015048.3	63.3918	73.3877	63.1679	77.8808	65.419	64.8661	15.5022	31.5507	34.3302	31.4496	65.8017	39.1288
NM_001015877.2	172.667	154.952	153.888	163.1	170.613	166.799	191.193	229.46	205.981	122.304	126.903	153.255
NM_001016.4	482.382	411.211	474.095	452.308	434.033	401.111	397.889	315.507	369.05	349.44	300.808	339.117
NM_001017.3	914.05	845.355	829.247	850.548	833.35	766.148	1007.64	963.731	1084.26	856.128	846.022	697.797
NM_001017392.5	95.3896	100.709	94.4159	121.614	138.339	138.006	211.863	157.754	160.208	195.686	258.507	169.558
NM_001017405.3	61.5807	70.5958	80.3039	62.0051	65.7679	54.9376	82.6782	57.3649	57.217	69.888	79.9021	68.4754
NM_001017420.3	43.4687	58.8299	59.8079	61.8553	65.5934	51.9591	41.3391	54.4967	60.0779	76.8768	65.8017	55.4325
NM_001017928.4	36.8276	38.2893	34.944	35.1961	39.6003	33.0949	5.16739	31.5507	22.8868	3.4944	4.70012	22.8251
NM_001017962.3	62.7881	68.6016	64.8479	81.9246	81.9918	82.7374	82.6782	54.4967	42.9128	62.8992	37.601	42.3896
NM_001017969.3	12.6784	16.5521	21.168	16.7743	18.4918	21.1808	41.3391	37.2872	17.1651	48.9216	37.601	45.6503
NM_001017979.3	11.4709	10.5694	16.128	14.6775	13.2582	18.8641	10.3348	5.73649	2.86085	13.9776	4.70012	6.52147
NM_001017980.4	41.0538	46.2662	45.0239	42.6847	49.3695	49.9734	20.6696	31.5507	25.7477	17.472	18.8005	32.6074
NM_001017995.3	108.068	115.067	119.28	74.8854	88.6209	100.94	118.85	186.436	160.208	111.821	136.304	143.472
NM_001017998.4	19.9232	14.159	14.112	15.4264	14.1305	9.26659	15.5022	25.8142	14.3043	6.9888	32.9009	22.8251
NM_001018.5	484.797	419.786	421.007	309.277	326.048	320.028	372.052	349.926	326.137	216.653	300.808	309.77
NM_001018005.2	249.341	160.137	175.728	205.935	189.802	194.598	206.696	120.466	108.712	97.8432	98.7026	120.647
NM_001018050.4	15.697	13.9596	14.784	13.1798	14.6538	9.92848	0	11.473	5.7217	20.9664	23.5006	16.3037
NM_001018055.3	28.3754	32.7054	30.912	32.65	29.1332	27.1379	10.3348	20.0777	31.4694	20.9664	4.70012	19.5644
NM_001018057.2	41.6575	42.876	46.7039	37.1432	32.0989	53.9448	51.6739	25.8142	62.9387	6.9888	28.2007	55.4325
NM_001018069.2	784.851	664.279	737.183	776.112	761.302	679.439	294.541	272.483	237.451	199.181	282.007	251.077
NM_001018072.2	71.2404	94.5266	81.9839	84.7703	86.5275	85.385	113.683	146.281	148.764	174.72	188.005	189.123
NM_001018108.4	41.6575	36.8933	47.0399	32.7998	32.9712	45.3401	20.6696	5.73649	22.8868	6.9888	23.5006	19.5644
NM_001018109.3	43.4687	50.4541	63.8399	54.3668	55.4753	51.6281	31.0043	68.8379	48.6345	83.8656	51.7014	52.1718
NM_001018111.3	381.559	394.659	383.376	358.102	352.39	417.327	330.713	283.956	343.302	314.496	366.61	427.156
NM_001018113.3	26.5642	22.9337	24.528	27.5578	23.5508	34.0878	41.3391	14.3412	31.4694	13.9776	23.5006	39.1288
NM_001018115.3	168.441	183.669	169.68	170.14	210.213	190.958	170.524	272.483	254.616	248.102	253.807	202.166
NM_001019.5	805.982	741.057	746.255	640.12	632.732	715.182	873.289	906.366	926.916	751.296	780.221	681.494
NM_001020.6	626.674	549.61	634.703	483.46	478.169	466.97	413.391	324.112	452.015	241.114	361.91	332.595
NM_001020658.2	201.646	190.449	211.008	150.37	162.762	140.654	284.206	226.592	257.477	209.664	225.606	221.73
NM_001021.6	429.253	418.589	440.159	412.619	364.951	359.742	521.906	467.524	569.31	433.306	568.715	440.199
NM_001022.4	707.574	535.85	605.135	398.84	400.015	407.73	707.932	590.859	706.63	352.934	314.908	476.067
NM_001023.4	528.265	520.694	511.391	514.313	505.034	583.464	496.069	493.339	540.701	566.093	502.913	531.5
NM_001023561.4	16.3008	18.1475	17.136	17.5232	13.6071	15.2237	31.0043	8.60474	8.58256	17.472	14.1004	13.0429
NM_001023563.4	18.7157	14.9567	20.496	25.461	25.2953	23.4974	20.6696	8.60474	14.3043	34.944	37.601	29.3466
NM_001023570.4	45.2799	44.0725	36.288	41.786	38.0302	37.3973	36.1717	54.4967	42.9128	41.9328	65.8017	26.0859
NM_001024.4	344.127	349.389	351.792	297.145	302.497	292.228	237.7	249.538	317.555	237.619	173.905	208.687
NM_001024211.2	14.4896	9.57231	12.432	13.9287	13.4327	11.9142	5.16739	8.60474	0	10.4832	9.40025	9.78221
NM_001024401.3	16.9045	11.766	14.448	7.63831	8.02473	9.26659	67.1761	54.4967	51.4953	24.4608	28.2007	45.6503
NM_001024599.5	404.5	325.259	361.536	199.195	249.29	247.881	242.867	240.933	260.338	125.798	141.004	133.69
NM_001024630.4	25.9605	29.9135	31.92	17.2236	18.1429	20.5189	5.16739	25.8142	31.4694	17.472	51.7014	16.3037
NM_001024674.3	19.9232	13.3614	8.73599	9.13602	9.24588	6.28804	0	2.86825	5.7217	6.9888	0	3.26074
NM_001024736.2	183.534	154.752	144.48	122.513	129.268	155.877	423.726	332.717	346.163	314.496	413.611	339.117
NM_001024807.3	123.765	96.5208	103.824	91.8095	111.299	103.256	175.691	114.73	163.069	188.698	159.804	140.212
NM_001024808.3	13.2821	16.3527	18.816	14.6775	16.0495	12.907	15.5022	14.3412	20.026	24.4608	0	6.52147
NM_001024924.2	94.7859	100.709	103.152	124.759	129.791	122.782	56.8413	126.203	100.13	97.8432	141.004	117.386
NM_001025.5	812.019	729.49	863.855	599.982	652.968	698.965	315.211	289.693	311.833	248.102	319.608	303.248
NM_001025091.2	128.595	128.827	149.856	111.429	107.636	123.113	139.52	106.125	102.991	83.8656	61.1016	61.954
NM_001025248.2	150.329	138.001	150.528	156.211	160.32	147.934	93.013	91.7839	91.5473	90.8544	89.3024	97.8221
NM_001025300.3	24.1493	22.9337	26.208	25.7606	27.7376	23.1665	10.3348	8.60474	11.4434	6.9888	18.8005	6.52147
NM_001025356.3	95.9934	97.7174	87.0239	98.9985	92.6333	98.9539	67.1761	63.1014	51.4953	48.9216	98.7026	91.3006
NM_001025595.3	47.6948	51.6506	48.3839	45.2308	43.6126	37.3973	51.6739	40.1555	40.0519	27.9552	47.0012	48.911
NM_001025603.2	10.8672	12.9625	15.792	12.5807	12.386	13.8999	36.1717	43.0237	25.7477	41.9328	18.8005	22.8251
NM_001025780.3	45.2799	44.0725	44.0159	39.839	46.4039	42.0306	41.3391	48.7602	25.7477	20.9664	28.2007	22.8251
NM_001028.3	632.711	580.521	590.687	521.053	546.379	508.007	537.409	484.734	517.814	401.856	404.211	381.506
NM_001029.5	585.016	492.177	538.271	474.923	544.111	469.617	211.863	266.747	371.911	244.608	319.608	309.77
NM_001029858.4	97.8046	127.431	125.328	113.376	115.835	129.732	46.5065	74.5744	54.3562	45.4272	70.5019	91.3006
NM_001029896.2	20.5269	19.3441	16.128	16.1752	13.0838	19.1951	10.3348	5.73649	17.1651	20.9664	9.40025	9.78221
NM_001030.6	489.023	418.39	479.807	387.757	430.021	320.69	366.885	249.538	406.241	258.586	258.507	156.515
NM_001030006.2	602.524	586.304	607.151	799.027	855.506	775.415	759.606	771.558	712.352	926.016	977.626	867.356
NM_001030055.2	186.553	176.49	171.024	260.451	257.14	230.672	175.691	180.7	114.434	276.058	258.507	238.034
NM_001031.5	111.69	92.9312	110.544	62.9037	69.7802	70.1613	118.85	103.257	145.903	38.4384	61.1016	74.9969
NM_001031623.3	54.3359	62.8183	57.7919	71.2909	72.5714	63.5423	41.3391	57.3649	31.4694	87.36	84.6022	78.2577
NM_001031684.3	297.64	262.242	275.52	468.183	406.295	369.009	351.382	392.95	434.849	660.442	620.416	430.417
NM_001031685.3	139.462	138.2	139.44	109.333	109.032	99.9467	82.6782	71.7062	91.5473	73.3824	84.6022	58.6932
NM_001031689.3	134.028	143.784	154.224	200.244	209.166	208.167	77.5108	126.203	131.599	209.664	206.805	130.429
NM_001031692.3	144.292	159.738	140.784	125.658	118.626	115.501	134.352	134.808	120.156	101.338	79.9021	114.126
NM_001031701.3	11.4709	15.9539	13.776	21.1177	18.3173	20.1879	10.3348	5.73649	25.7477	17.472	4.70012	6.52147
NM_001031702.4	175.082	155.949	152.88	141.833	151.074	160.51	506.404	384.345	328.998	321.485	357.209	329.334
NM_001031703.3	21.7343	23.1331	21.504	23.3642	25.1209	23.4974	41.3391	14.3412	11.4434	34.944	42.3011	29.3466
NM_001031710.3	170.856	212.585	205.632	212.225	215.621	203.203	113.683	166.358	108.712	153.754	75.202	163.037
NM_001031711.3	56.1471	63.0177	60.8159	66.4982	69.6058	92.9968	46.5065	48.7602	62.9387	62.8992	56.4015	84.7791
NM_001031712.3	36.8276	37.8904	47.3759	48.5257	42.7404	47.6567	15.5022	34.419	22.8868	45.4272	42.3011	48.911
NM_001031713.4	19.3194	26.7227	24.864	33.6984	28.261	31.4402	31.0043	11.473	17.1651	24.4608	14.1004	13.0429
NM_001031722.4	38.6388	37.0927	32.592	28.9058	26.8654	28.7926	46.5065	43.0237	34.3302	13.9776	28.2007	35.8681
NM_001031723.4	33.2053	36.4944	34.944	40.2883	28.6099	30.4474	25.8369	34.419	42.9128	27.9552	32.9009	26.0859
NM_001031725.6	13.8858	17.5492	18.48	26.2099	26.6909	22.8355	10.3348	8.60474	5.7217	20.9664	32.9009	19.5644
NM_001031732.4	136.443	117.66	137.424	100.197	102.751	113.516	62.0087	114.73	62.9387	69.888	98.7026	81.5184
NM_001031827.3	19.3194	15.555	23.856	8.68671	10.467	20.5189	10.3348	5.73649	8.58256	3.4944	9.40025	9.78221
NM_001032.5	292.81	269.62	275.184	263.297	251.907	187.979	377.219	226.592	306.111	195.686	286.708	166.298
NM_001032221.6	35.6202	28.7169	26.208	19.3204	23.3764	27.7998	31.0043	37.2872	25.7477	31.4496	23.5006	13.0429
NM_001032283.3	508.342	491.379	496.607	449.013	449.734	446.12	403.056	332.717	328.998	269.069	239.706	280.423
NM_001032288.3	126.18	119.255	123.312	121.165	110.951	116.825	103.348	68.8379	105.852	55.9104	32.9009	71.7362
NM_001032296.4	99.012	94.9255	106.512	98.8487	105.194	100.278	46.5065	63.1014	74.3821	24.4608	47.0012	58.6932
NM_001032363.4	130.406	141.59	148.512	181.223	180.556	150.582	98.1804	88.9157	102.991	104.832	51.7014	81.5184
NM_001032373.2	7.24478	11.3671	9.40799	13.1798	13.7816	17.5403	5.16739	20.0777	20.026	24.4608	23.5006	35.8681
NM_001032382.2	41.6575	40.8818	38.9759	27.2583	21.1085	23.1665	36.1717	43.0237	37.1911	10.4832	14.1004	13.0429
NM_001032386.2	9.65971	13.9596	10.08	11.2328	11.3393	13.238	10.3348	28.6825	22.8868	24.4608	23.5006	19.5644
NM_001032396.4	69.4292	62.8183	56.4479	50.6225	56.522	54.6067	98.1804	74.5744	71.5213	90.8544	51.7014	74.9969
NM_001032999.3	17.5082	15.1562	11.424	12.431	15.5261	14.5618	25.8369	22.946	17.1651	3.4944	9.40025	9.78221
NM_001033.5	514.983	542.631	533.231	561.64	598.191	555.002	620.087	628.146	577.892	541.632	615.716	547.804
NM_001033002.4	47.6948	42.0783	49.3919	33.3989	35.5879	33.0949	67.1761	25.8142	31.4694	20.9664	42.3011	16.3037
NM_001033025.3	58.562	55.8385	52.4159	67.3969	71.1758	66.8518	46.5065	48.7602	57.217	41.9328	65.8017	58.6932
NM_001033026.2	23.5455	31.9077	30.24	23.2145	24.4231	26.8069	98.1804	140.544	82.9647	45.4272	65.8017	110.865
NM_001033031.2	10.8672	9.77174	9.74399	10.484	7.50137	9.26659	0	0	0	0	0	9.78221
NM_001033044.4	178.101	136.605	141.456	137.04	146.015	128.408	217.03	160.622	188.816	115.315	136.304	146.733
NM_001033057.2	80.2963	77.3762	80.3039	61.2563	65.9423	57.5852	170.524	131.939	105.852	115.315	117.503	224.991
NM_001033088.3	16.9045	15.7544	14.112	21.567	17.9684	27.1379	103.348	83.1792	57.217	55.9104	70.5019	146.733
NM_001033561.2	38.6388	32.7054	28.224	35.3459	32.7967	39.7139	77.5108	86.0474	82.9647	52.416	56.4015	71.7362
NM_001033564.3	12.6784	10.5694	10.08	13.9287	11.5137	10.2594	20.6696	8.60474	8.58256	17.472	9.40025	13.0429
NM_001033566.3	44.6762	56.4368	56.4479	58.1111	69.4313	63.8732	36.1717	40.1555	34.3302	27.9552	32.9009	52.1718
NM_001033910.3	11.4709	13.3614	13.776	9.58533	8.02473	9.92848	5.16739	14.3412	14.3043	27.9552	28.2007	22.8251
NM_001033930.3	306.696	252.071	281.232	242.778	238.648	204.196	372.052	318.375	326.137	94.3488	141.004	247.816
NM_001034.4	630.9	591.29	580.271	651.203	590.166	572.543	651.091	688.379	669.439	656.947	578.115	661.929
NM_001034077.4	659.879	482.804	636.719	262.398	361.985	372.318	506.404	421.632	463.458	150.259	202.105	303.248
NM_001034116.2	44.6762	49.8558	56.7839	39.6893	39.2514	45.3401	41.3391	34.419	31.4694	41.9328	51.7014	42.3896
NM_001034852.3	144.896	124.839	135.072	96.9017	80.9451	90.0183	134.352	103.257	105.852	94.3488	150.404	91.3006
NM_001034954.3	24.753	30.3123	26.88	20.3688	23.0275	21.1808	15.5022	20.0777	17.1651	20.9664	23.5006	3.26074
NM_001034996.3	826.509	762.196	773.471	646.86	640.408	647.999	501.237	430.237	437.71	335.462	376.01	339.117
NM_001035005.4	38.6388	52.6477	43.0079	64.2517	61.93	67.8446	46.5065	71.7062	37.1911	48.9216	79.9021	65.2147
NM_001035006.5	1194.79	994.324	1065.45	1064.12	1006.41	922.356	692.43	608.068	657.996	447.283	526.414	482.589
NM_001035235.4	28.9791	27.7198	21.504	27.7076	28.9588	33.0949	15.5022	20.0777	22.8868	17.472	32.9009	19.5644
NM_001035267.2	140.67	90.3387	128.352	104.54	103.275	93.9896	0	0	2.86085	3.4944	4.70012	6.52147
NM_001037131.3	21.1306	18.5464	15.792	17.2236	26.5165	21.8427	62.0087	57.3649	74.3821	41.9328	56.4015	42.3896
NM_001037132.4	451.591	550.608	527.855	581.26	589.643	570.557	304.876	278.22	306.111	370.406	380.71	348.899
NM_001037165.2	32.6015	44.4714	35.28	27.8574	29.4821	28.4617	46.5065	45.892	65.7996	52.416	18.8005	58.6932
NM_001037171.2	53.1284	50.6535	64.5119	71.5904	70.8269	63.5423	46.5065	54.4967	48.6345	69.888	89.3024	65.2147
NM_001037172.3	10.8672	11.1677	9.40799	13.6291	12.9093	12.907	15.5022	14.3412	8.58256	13.9776	14.1004	22.8251
NM_001037283.2	321.185	249.279	314.16	276.926	289.762	245.895	196.361	203.646	234.59	276.058	220.906	127.169
NM_001037317.2	10.2634	13.3614	10.08	16.0255	10.9904	13.8999	5.16739	14.3412	2.86085	13.9776	23.5006	16.3037
NM_001037333.3	134.028	140.793	128.688	165.047	170.264	156.87	186.026	174.963	123.017	199.181	197.405	218.469
NM_001037442.4	114.105	97.9168	96.4319	136.291	124.209	129.732	93.013	123.335	134.46	139.776	122.203	176.08
NM_001037582.3	41.6575	48.4598	45.3599	40.1386	46.7528	46.002	41.3391	37.2872	34.3302	24.4608	23.5006	35.8681
NM_001037637.2	653.238	597.671	595.055	598.185	595.923	575.852	470.232	476.129	452.015	345.946	399.511	342.377
NM_001037806.4	25.3567	22.9337	23.52	16.6246	16.0495	17.8713	124.017	80.3109	65.7996	52.416	108.103	84.7791
NM_001037954.4	14.4896	19.7429	16.8	36.3943	36.1113	40.7068	0	14.3412	17.1651	31.4496	47.0012	52.1718
NM_001037984.3	28.9791	33.5031	32.256	34.1477	31.0522	37.3973	93.013	77.4427	68.6604	76.8768	117.503	52.1718
NM_001039111.3	7.24478	9.37289	16.464	15.1268	13.2582	14.2308	51.6739	31.5507	45.7736	48.9216	61.1016	55.4325
NM_001039141.3	33.2053	46.4656	38.304	48.376	56.8709	63.8732	186.026	146.281	128.738	94.3488	145.704	110.865
NM_001039182.4	16.9045	15.3556	22.848	10.484	9.94368	21.1808	10.3348	5.73649	5.7217	3.4944	9.40025	9.78221
NM_001039469.3	45.8836	43.2748	48.7199	28.756	31.2267	28.1307	41.3391	68.8379	74.3821	41.9328	14.1004	45.6503
NM_001039479.2	34.4127	25.3267	23.184	27.7076	27.2143	29.4545	62.0087	60.2332	37.1911	73.3824	56.4015	65.2147
NM_001039547.3	9.65971	9.37289	11.088	13.0301	11.1648	11.2523	15.5022	8.60474	5.7217	27.9552	23.5006	19.5644
NM_001039570.3	21.1306	24.1302	26.208	23.0647	22.1552	25.8141	72.3435	45.892	40.0519	48.9216	47.0012	45.6503
NM_001039580.2	34.4127	35.8962	39.6479	55.2654	49.8929	49.9734	36.1717	20.0777	31.4694	38.4384	37.601	39.1288
NM_001039591.3	919.484	918.942	874.607	1045.4	1050.89	885.621	780.276	719.93	726.656	915.533	1019.93	860.834
NM_001039613.3	45.8836	40.2835	47.0399	54.0673	51.9863	61.5566	15.5022	11.473	22.8868	24.4608	9.40025	26.0859
NM_001039672.3	23.5455	27.1216	32.592	31.4519	21.9808	37.0663	36.1717	43.0237	31.4694	38.4384	32.9009	52.1718
NM_001039697.2	68.8254	83.1595	94.7519	84.4707	83.2129	80.4207	41.3391	57.3649	62.9387	69.888	47.0012	55.4325
NM_001039705.3	67.0142	69.5987	77.9519	79.9776	84.6085	64.2042	196.361	220.855	174.512	276.058	225.606	146.733
NM_001039707.2	18.112	12.9625	11.76	13.9287	13.2582	11.9142	41.3391	17.2095	34.3302	24.4608	28.2007	19.5644
NM_001039844.3	21.1306	10.5694	14.112	15.5762	15.875	12.907	10.3348	2.86825	8.58256	0	4.70012	3.26074
NM_001039886.4	11.4709	13.3614	16.128	34.1477	35.0646	37.3973	10.3348	22.946	2.86085	20.9664	14.1004	16.3037
NM_001039960.3	78.4851	75.7808	81.6479	74.7356	73.2692	71.4851	77.5108	65.9697	74.3821	52.416	89.3024	48.911
NM_001040025.3	10.8672	13.7602	9.07199	12.7305	10.9904	14.2308	0	8.60474	2.86085	27.9552	9.40025	19.5644
NM_001040058.2	789.681	673.253	667.967	1120.88	1055.25	1088.82	573.58	573.649	617.944	796.723	709.719	674.972
NM_001040092.3	449.177	362.352	376.992	421.455	404.551	395.154	258.369	278.22	240.312	283.046	333.709	299.988
NM_001040108.2	10.2634	17.9481	18.816	22.4656	24.4231	22.8355	10.3348	20.0777	45.7736	24.4608	28.2007	39.1288
NM_001040118.3	7.84851	10.1706	12.096	10.3342	14.3049	12.2451	20.6696	40.1555	25.7477	38.4384	56.4015	65.2147
NM_001040157.3	31.9978	28.1187	32.256	38.3413	34.7157	27.7998	15.5022	20.0777	31.4694	24.4608	28.2007	19.5644
NM_001040167.2	44.0724	43.2748	39.6479	29.9542	23.5508	21.5117	87.8456	74.5744	100.13	55.9104	37.601	29.3466
NM_001040181.2	95.3896	88.9428	91.3919	79.079	64.1978	78.766	41.3391	74.5744	31.4694	27.9552	32.9009	35.8681
NM_001040185.3	10.8672	12.3642	11.424	18.4218	17.6195	17.5403	15.5022	17.2095	8.58256	20.9664	14.1004	16.3037
NM_001040202.2	22.9418	19.7429	22.512	21.8665	23.0275	24.8212	25.8369	14.3412	25.7477	24.4608	47.0012	29.3466
NM_001040260.4	115.917	110.082	124.32	104.39	113.916	108.882	144.687	192.173	134.46	174.72	169.204	127.169
NM_001040272.6	28.9791	26.1244	25.872	23.2145	23.8997	25.8141	41.3391	34.419	48.6345	55.9104	28.2007	42.3896
NM_001040402.3	57.9583	57.035	48.7199	62.0051	56.8709	46.002	62.0087	45.892	62.9387	55.9104	79.9021	55.4325
NM_001040429.3	48.2986	42.2777	31.92	20.8181	23.3764	26.145	98.1804	60.2332	97.269	52.416	37.601	39.1288
NM_001040431.3	27.1679	22.9337	22.512	29.2053	27.7376	21.1808	31.0043	25.8142	31.4694	34.944	14.1004	39.1288
NM_001040436.3	54.9396	45.2691	50.0639	53.0189	52.6841	56.2614	41.3391	40.1555	62.9387	83.8656	89.3024	55.4325
NM_001040440.3	24.753	27.321	26.88	47.028	40.647	43.0234	25.8369	2.86825	17.1651	34.944	18.8005	39.1288
NM_001040441.3	15.0933	17.9481	14.784	26.809	23.5508	23.8284	10.3348	17.2095	20.026	41.9328	18.8005	26.0859
NM_001040446.3	39.2426	31.5089	32.256	41.3367	38.5536	31.4402	20.6696	34.419	11.4434	66.3936	56.4015	52.1718
NM_001040450.3	13.8858	20.3412	18.48	25.6108	25.1209	23.8284	36.1717	11.473	8.58256	38.4384	32.9009	39.1288
NM_001040455.2	14.4896	12.9625	14.448	14.2282	13.2582	16.2165	15.5022	14.3412	25.7477	31.4496	28.2007	42.3896
NM_001040456.3	36.2239	41.6795	32.256	32.5003	36.9835	36.0735	41.3391	43.0237	48.6345	69.888	65.8017	71.7362
NM_001040458.3	105.653	119.455	101.472	135.093	146.19	136.682	98.1804	88.9157	80.1039	101.338	145.704	107.604
NM_001040616.3	12.6784	12.9625	9.40799	16.9241	12.5604	13.238	15.5022	8.60474	20.026	20.9664	47.0012	29.3466
NM_001040694.2	101.427	88.7433	94.0799	43.134	63.5	56.5924	72.3435	103.257	85.8256	31.4496	32.9009	78.2577
NM_001040697.4	30.1866	38.2893	32.256	42.0856	35.9368	33.7568	10.3348	14.3412	31.4694	3.4944	18.8005	16.3037
NM_001040716.2	19.9232	13.1619	16.8	11.8319	15.0027	14.8927	25.8369	54.4967	31.4694	31.4496	51.7014	29.3466
NM_001040874.1	744.401	576.134	677.039	344.922	336.69	463.329	444.396	410.159	477.762	241.114	286.708	326.074
NM_001042371.3	36.2239	31.9077	34.608	23.514	19.0151	17.5403	46.5065	51.6284	57.217	69.888	18.8005	29.3466
NM_001042388.3	221.57	234.522	226.8	179.725	178.114	185.663	284.206	292.561	294.668	213.158	249.107	348.899
NM_001042413.2	22.9418	23.1331	18.816	13.6291	16.2239	19.526	62.0087	28.6825	34.3302	45.4272	18.8005	26.0859
NM_001042424.3	144.292	140.195	139.44	125.059	130.14	146.611	372.052	315.507	308.972	276.058	343.109	299.988
NM_001042432.2	13.2821	16.3527	14.448	9.58533	12.0371	11.5832	36.1717	22.946	25.7477	6.9888	23.5006	9.78221
NM_001042454.3	39.2426	42.4771	45.3599	47.028	60.5343	61.5566	103.348	71.7062	88.6864	97.8432	84.6022	74.9969
NM_001042462.2	25.3567	27.5204	23.856	17.8227	22.3297	29.1236	51.6739	45.892	51.4953	41.9328	51.7014	55.4325
NM_001042472.3	42.865	34.8991	34.944	46.1294	53.7308	51.6281	41.3391	31.5507	34.3302	31.4496	56.4015	26.0859
NM_001042475.3	15.697	15.1562	16.464	19.0209	14.8283	15.5546	15.5022	8.60474	11.4434	20.9664	14.1004	22.8251
NM_001042479.2	10.2634	10.5694	9.74399	11.3826	8.54808	12.2451	5.16739	20.0777	17.1651	10.4832	14.1004	13.0429
NM_001042492.3	237.87	218.368	214.704	210.278	207.422	211.808	382.387	306.902	223.146	314.496	366.61	374.985
NM_001042517.2	78.4851	72.1912	66.1919	70.8416	71.5247	70.8232	56.8413	63.1014	62.9387	97.8432	79.9021	71.7362
NM_001042545.2	50.7135	46.2662	32.592	33.998	35.4135	41.3687	113.683	74.5744	94.4081	52.416	56.4015	101.083
NM_001042552.3	13.8858	10.9683	17.472	18.5716	20.0618	19.526	0	0	14.3043	3.4944	14.1004	9.78221
NM_001042603.3	118.331	140.195	142.128	124.01	123.162	138.999	124.017	117.598	105.852	132.787	178.605	120.647
NM_001042618.2	47.6948	60.2258	65.8559	54.5166	60.7088	56.5924	36.1717	48.7602	45.7736	41.9328	23.5006	48.911
NM_001042635.2	55.5433	39.2864	54.7679	45.5303	39.2514	39.7139	36.1717	28.6825	51.4953	38.4384	37.601	22.8251
NM_001042646.3	46.4874	37.0927	33.264	31.0026	30.8778	43.3544	129.185	157.754	94.4081	83.8656	141.004	114.126
NM_001042681.2	135.84	131.22	128.352	83.1228	97.5179	96.3063	139.52	195.041	208.842	146.765	150.404	136.951
NM_001042683.3	44.0724	56.2373	50.3999	45.081	51.6374	49.6424	98.1804	63.1014	65.7996	62.8992	42.3011	58.6932
NM_001042697.2	17.5082	17.1504	18.48	22.3158	21.9808	25.8141	5.16739	8.60474	14.3043	13.9776	4.70012	13.0429
NM_001042724.2	77.8814	86.7491	85.6799	66.0489	68.0357	70.1613	134.352	114.73	151.625	104.832	126.903	117.386
NM_001042750.2	335.071	361.754	328.944	325.003	317.674	291.566	165.356	223.723	237.451	290.035	249.107	234.773
NM_001044305.3	55.5433	53.6448	51.4079	53.3184	57.5687	59.5709	46.5065	37.2872	51.4953	41.9328	32.9009	55.4325
NM_001044385.3	37.4314	47.2633	44.3519	54.9659	51.9863	53.2829	15.5022	25.8142	11.4434	31.4496	32.9009	32.6074
NM_001046.3	124.369	137.004	141.12	158.607	156.657	157.532	56.8413	83.1792	94.4081	118.81	112.803	58.6932
NM_001047.4	9.65971	13.5608	12.432	20.5186	21.1085	19.857	5.16739	25.8142	14.3043	27.9552	23.5006	9.78221
NM_001047160.3	45.8836	47.6622	55.1039	47.3276	41.3448	44.3472	15.5022	48.7602	20.026	48.9216	47.0012	55.4325
NM_001048166.1	61.5807	73.7866	73.9199	72.1895	67.6868	67.8446	41.3391	80.3109	45.7736	73.3824	65.8017	55.4325
NM_001048183.3	62.1844	56.2373	57.1199	42.9842	49.8929	47.9877	41.3391	28.6825	60.0779	41.9328	47.0012	42.3896
NM_001048201.3	281.339	232.328	240.912	144.828	172.881	183.015	408.224	341.321	431.989	195.686	220.906	270.641
NM_001048205.2	62.7881	58.431	68.5439	52.27	64.5467	46.9948	124.017	100.389	94.4081	97.8432	79.9021	68.4754
NM_001048241.3	146.103	120.651	130.704	130.151	129.093	123.113	139.52	77.4427	102.991	76.8768	131.603	78.2577
NM_001048249.4	18.7157	19.5435	14.112	15.8757	16.0495	20.1879	20.6696	0	2.86085	3.4944	9.40025	13.0429
NM_001064.4	461.855	548.414	491.567	358.102	406.121	380.261	666.593	676.906	623.666	527.655	549.915	479.328
NM_001065.4	37.4314	43.4743	35.952	48.376	49.7184	47.9877	56.8413	48.7602	40.0519	38.4384	42.3011	32.6074
NM_001067.4	1164	1128.93	1173.98	1032.07	1333.33	1088.49	1302.18	1454.2	1504.81	1223.04	1602.74	1206.47
NM_001069.3	1304.06	1124.15	1191.45	1105.91	1237.38	1379.4	1477.87	1600.48	1524.83	1488.61	1555.74	1757.54
NM_001070.5	66.4105	66.2085	73.5839	61.1065	66.989	72.147	77.5108	68.8379	97.269	83.8656	32.9009	71.7362
NM_001071.4	444.95	472.434	456.287	478.518	445.721	462.005	320.378	421.632	394.798	317.99	385.41	355.42
NM_001071775.3	26.5642	29.5146	34.272	24.5624	26.6909	31.1092	0	5.73649	2.86085	0	0	13.0429
NM_001076678.3	13.8858	14.3585	15.12	14.5278	12.9093	21.1808	5.16739	8.60474	8.58256	10.4832	14.1004	9.78221
NM_001076786.3	129.802	131.619	141.12	182.571	164.681	179.706	98.1804	134.808	137.321	143.27	206.805	228.251
NM_001077195.2	48.2986	86.1508	72.9119	127.006	108.334	133.373	36.1717	100.389	62.9387	118.81	112.803	133.69
NM_001077198.3	31.9978	26.7227	22.512	25.7606	25.9931	32.1021	20.6696	43.0237	45.7736	52.416	23.5006	26.0859
NM_001077199.3	57.3545	42.876	49.0559	41.6363	48.6717	48.6496	62.0087	63.1014	62.9387	45.4272	42.3011	84.7791
NM_001077207.4	385.785	368.335	366.24	368.137	361.81	390.189	361.717	367.136	380.493	352.934	380.71	401.07
NM_001077350.3	25.3567	21.3383	19.488	19.7697	20.5852	17.8713	46.5065	43.0237	31.4694	41.9328	42.3011	22.8251
NM_001077351.2	72.4478	51.4512	59.8079	50.323	54.0797	45.3401	56.8413	40.1555	37.1911	38.4384	47.0012	35.8681
NM_001077365.2	25.9605	18.7458	24.192	21.1177	18.1429	21.8427	20.6696	28.6825	22.8868	10.4832	23.5006	26.0859
NM_001077415.3	15.697	14.5579	10.08	12.8803	17.9684	16.8784	10.3348	5.73649	14.3043	10.4832	9.40025	16.3037
NM_001077446.4	39.2426	34.1014	35.28	22.3158	32.2734	31.7711	72.3435	40.1555	71.5213	80.3712	51.7014	48.911
NM_001077498.3	7.84851	12.1648	9.40799	9.7351	10.467	9.92848	36.1717	31.5507	25.7477	20.9664	23.5006	26.0859
NM_001077525.3	26.5642	22.3354	23.52	26.809	23.0275	24.8212	31.0043	37.2872	22.8868	48.9216	56.4015	58.6932
NM_001077619.2	23.5455	32.7054	27.552	32.3505	30.1799	23.1665	5.16739	11.473	8.58256	6.9888	28.2007	13.0429
NM_001077628.3	38.6388	45.6679	43.6799	44.4819	47.2761	62.5494	62.0087	83.1792	82.9647	48.9216	51.7014	74.9969
NM_001077663.3	14.4896	16.3527	15.792	13.6291	14.3049	18.5332	41.3391	11.473	22.8868	41.9328	51.7014	39.1288
NM_001077700.3	46.4874	36.8933	44.6879	44.7815	44.4849	40.7068	31.0043	22.946	31.4694	45.4272	47.0012	13.0429
NM_001078.4	7.84851	11.1677	14.112	13.3296	19.1896	15.2237	20.6696	11.473	14.3043	34.944	14.1004	22.8251
NM_001078170.3	239.078	104.897	168.336	75.784	110.602	106.235	160.189	137.676	134.46	83.8656	98.7026	114.126
NM_001078171.2	67.0142	51.0523	54.4319	50.7723	49.544	45.671	129.185	77.4427	114.434	55.9104	89.3024	58.6932
NM_001078172.2	30.1866	25.7256	32.928	29.0555	35.5879	24.8212	46.5065	37.2872	88.6864	48.9216	42.3011	26.0859
NM_001078173.2	28.9791	18.5464	27.216	26.5094	27.5632	22.8355	15.5022	51.6284	37.1911	34.944	56.4015	16.3037
NM_001078645.3	129.199	144.582	146.16	245.025	238.299	196.584	118.85	83.1792	77.243	178.214	173.905	133.69
NM_001079514.3	34.4127	30.1129	31.248	23.6638	23.5508	21.5117	165.356	106.125	82.9647	69.888	61.1016	61.954
NM_001079521.2	254.171	272.013	278.88	372.33	406.644	373.311	222.198	255.274	248.894	300.518	258.507	257.598
NM_001079524.2	957.519	890.225	929.039	1176.45	1135.32	1013.7	1069.65	955.126	1089.98	1167.13	1170.33	1092.35
NM_001079537.2	4.82986	15.555	14.784	11.9817	14.4794	17.5403	5.16739	14.3412	11.4434	3.4944	9.40025	9.78221
NM_001079559.3	255.379	235.519	247.296	211.476	215.098	237.953	180.859	189.304	223.146	209.664	169.204	202.166
NM_001079673.2	132.217	166.319	147.504	147.075	158.401	168.122	242.867	232.328	240.312	167.731	169.204	185.862
NM_001079675.5	6.03732	17.1504	17.136	20.5186	31.2267	26.476	5.16739	31.5507	37.1911	31.4496	42.3011	32.6074
NM_001079802.2	16.3008	18.7458	15.12	23.6638	21.4574	21.1808	20.6696	14.3412	2.86085	13.9776	4.70012	9.78221
NM_001079855.2	54.9396	61.2229	63.8399	53.9175	45.0082	65.528	41.3391	80.3109	65.7996	45.4272	56.4015	84.7791
NM_001079862.4	152.14	150.963	139.44	138.388	118.975	143.301	186.026	206.514	268.92	143.27	89.3024	140.212
NM_001079866.2	15.697	18.7458	15.12	22.6154	19.364	17.8713	20.6696	17.2095	17.1651	31.4496	23.5006	26.0859
NM_001079872.2	168.441	188.256	168	218.366	218.587	187.648	160.189	232.328	188.816	227.136	202.105	208.687
NM_001079910.2	9.05598	10.1706	10.08	14.378	13.4327	14.5618	0	11.473	11.4434	13.9776	4.70012	9.78221
NM_001080.3	7.24478	10.1706	16.8	18.5716	17.9684	18.8641	15.5022	11.473	17.1651	20.9664	18.8005	29.3466
NM_001080392.2	15.697	14.159	14.784	10.9333	8.02473	12.907	15.5022	37.2872	25.7477	20.9664	18.8005	13.0429
NM_001080394.4	17.5082	17.9481	17.472	28.0071	23.3764	28.7926	46.5065	34.419	34.3302	41.9328	61.1016	61.954
NM_001080414.4	20.5269	17.3498	15.792	15.2766	19.8874	20.5189	51.6739	31.5507	40.0519	24.4608	42.3011	65.2147
NM_001080415.2	258.397	247.484	252	329.795	337.387	302.488	279.039	240.933	214.564	262.08	211.506	277.163
NM_001080417.3	23.5455	20.9394	19.824	25.1615	30.3544	22.8355	67.1761	63.1014	37.1911	31.4496	61.1016	81.5184
NM_001080421.3	15.0933	13.5608	13.44	16.7743	15.5261	29.4545	36.1717	43.0237	25.7477	41.9328	47.0012	61.954
NM_001080425.4	41.6575	40.4829	41.9999	46.5787	48.3228	57.5852	5.16739	20.0777	20.026	20.9664	0	19.5644
NM_001080430.4	103.238	109.284	96.0959	63.6526	62.1044	82.7374	82.6782	91.7839	108.712	48.9216	42.3011	74.9969
NM_001080432.3	121.954	106.891	114.24	110.082	107.113	119.473	82.6782	71.7062	91.5473	48.9216	51.7014	91.3006
NM_001080449.3	97.8046	100.509	107.856	101.844	99.4368	89.6873	149.854	129.071	140.182	150.259	145.704	117.386
NM_001080453.3	59.7695	70.5958	67.8719	62.754	72.2225	62.5494	258.369	212.25	180.234	199.181	192.705	159.776
NM_001080457.2	52.5247	43.2748	51.4079	31.9012	38.5536	48.6496	155.022	91.7839	91.5473	108.326	89.3024	114.126
NM_001080466.2	16.9045	24.5291	21.504	17.8227	25.2953	25.4831	41.3391	45.892	40.0519	41.9328	56.4015	58.6932
NM_001080475.3	7.24478	9.37289	14.784	11.083	10.9904	9.59753	5.16739	17.2095	11.4434	13.9776	14.1004	22.8251
NM_001080477.4	962.349	904.384	924.671	989.685	965.933	892.571	986.971	843.265	726.656	992.41	803.721	1020.61
NM_001080480.3	12.6784	15.555	15.456	14.0785	14.6538	14.2308	0	28.6825	14.3043	31.4496	32.9009	26.0859
NM_001080495.3	62.1844	64.6131	63.5039	50.9221	54.603	59.24	289.374	278.22	220.286	202.675	188.005	221.73
NM_001080496.3	21.1306	15.9539	14.112	11.9817	12.5604	14.2308	31.0043	28.6825	25.7477	20.9664	28.2007	19.5644
NM_001080497.3	21.1306	19.7429	24.864	27.5578	24.9464	18.5332	51.6739	25.8142	17.1651	20.9664	37.601	32.6074
NM_001080517.3	68.2217	85.9514	59.1359	55.1156	49.8929	56.9233	222.198	292.561	231.729	143.27	188.005	264.12
NM_001080533.3	32.6015	42.6766	41.6639	32.9496	32.2734	34.4187	31.0043	34.419	40.0519	34.944	18.8005	29.3466
NM_001080543.2	19.3194	13.5608	10.752	8.38716	8.54808	11.5832	5.16739	11.473	34.3302	17.472	42.3011	29.3466
NM_001080779.2	47.6948	47.2633	50.0639	38.9404	38.2047	37.7282	56.8413	57.3649	77.243	62.8992	65.8017	71.7362
NM_001080792.4	18.7157	16.7516	21.504	17.8227	14.8283	16.2165	15.5022	40.1555	37.1911	20.9664	23.5006	22.8251
NM_001080826.3	81.5038	103.301	90.3839	45.2308	53.033	61.5566	149.854	186.436	171.651	66.3936	136.304	117.386
NM_001081550.2	211.91	204.808	194.208	171.338	191.198	169.115	196.361	217.987	234.59	223.642	202.105	195.644
NM_001082486.2	17.5082	21.5377	22.512	14.6775	15.875	19.857	25.8369	17.2095	2.86085	24.4608	47.0012	42.3896
NM_001082538.3	30.1866	24.7285	27.888	36.6938	34.8901	43.0234	5.16739	20.0777	17.1651	24.4608	32.9009	22.8251
NM_001082968.2	36.8276	32.506	42.6719	25.7606	29.6566	27.4688	20.6696	40.1555	57.217	17.472	9.40025	29.3466
NM_001083538.3	633.315	361.554	488.207	369.634	459.154	578.831	20.6696	45.892	48.6345	34.944	37.601	48.911
NM_001083601.3	13.2821	16.951	12.096	12.431	14.4794	15.2237	5.16739	25.8142	14.3043	3.4944	28.2007	22.8251
NM_001083603.3	30.7903	26.7227	33.264	32.7998	39.0769	44.0163	62.0087	106.125	82.9647	94.3488	136.304	136.951
NM_001083614.2	24.753	25.1273	28.56	22.3158	20.7596	24.8212	51.6739	25.8142	22.8868	31.4496	47.0012	68.4754
NM_001083893.2	143.084	126.634	114.24	115.174	93.68	91.673	98.1804	88.9157	97.269	94.3488	56.4015	48.911
NM_001083926.2	15.697	10.1706	13.44	12.1314	10.2926	12.907	10.3348	11.473	11.4434	3.4944	0	13.0429
NM_001083961.2	24.753	27.9193	28.896	17.3734	25.4698	22.8355	62.0087	80.3109	77.243	66.3936	75.202	68.4754
NM_001083962.2	59.7695	59.2287	57.7919	34.8966	43.0893	49.3115	51.6739	60.2332	85.8256	31.4496	51.7014	32.6074
NM_001083965.2	24.753	23.9308	19.488	29.0555	25.4698	26.476	25.8369	14.3412	17.1651	24.4608	9.40025	32.6074
NM_001084.5	43.4687	45.6679	49.7279	45.9796	49.544	59.24	139.52	83.1792	82.9647	111.821	122.203	104.344
NM_001084392.3	22.9418	21.5377	20.832	14.378	19.364	13.238	10.3348	22.946	11.4434	10.4832	28.2007	19.5644
NM_001084393.2	13.8858	13.3614	11.76	7.78808	11.8626	6.94994	0	11.473	8.58256	3.4944	18.8005	9.78221
NM_001085365.2	24.1493	20.9394	25.2	10.3342	12.7349	19.857	20.6696	8.60474	17.1651	10.4832	14.1004	16.3037
NM_001085377.2	62.7881	76.3791	70.5599	41.0372	57.9176	56.5924	62.0087	68.8379	88.6864	73.3824	51.7014	71.7362
NM_001085400.2	4.82986	11.1677	13.776	17.2236	18.8407	18.2022	5.16739	11.473	0	17.472	14.1004	13.0429
NM_001085411.3	28.3754	25.1273	31.248	39.9888	39.4258	32.433	10.3348	17.2095	11.4434	31.4496	18.8005	52.1718
NM_001085457.2	41.6575	31.3094	37.296	39.3897	45.8805	50.3043	31.0043	14.3412	14.3043	10.4832	37.601	16.3037
NM_001085458.2	379.144	318.479	344.736	327.698	348.378	321.683	408.224	395.818	349.024	380.89	455.912	440.199
NM_001085487.3	10.2634	20.9394	15.792	20.5186	19.364	17.5403	41.3391	51.6284	45.7736	59.4048	32.9009	26.0859
NM_001087.5	89.3523	81.1653	81.3119	81.4753	85.4808	72.147	103.348	94.6522	111.573	80.3712	108.103	84.7791
NM_001089.3	21.7343	25.1273	19.824	22.6154	25.8187	27.4688	98.1804	63.1014	48.6345	45.4272	79.9021	74.9969
NM_001093725.2	47.0911	45.2691	44.0159	13.6291	20.7596	25.8141	93.013	94.6522	88.6864	59.4048	32.9009	48.911
NM_001093771.3	327.223	337.225	347.424	392.399	396.003	365.037	253.202	255.274	311.833	391.373	296.108	260.859
NM_001096.3	621.24	614.224	629.999	480.315	589.468	511.317	888.791	874.815	909.751	580.071	709.719	743.448
NM_001097612.2	40.45	42.0783	46.7039	47.7769	46.0549	51.9591	41.3391	34.419	37.1911	48.9216	37.601	48.911
NM_001098.3	134.632	137.801	150.528	151.718	175.672	157.532	232.533	197.909	208.842	209.664	225.606	254.337
NM_001098204.2	313.941	265.233	252.672	262.249	266.212	243.91	186.026	261.01	223.146	153.754	126.903	189.123
NM_001098272.3	3931.5	3733	3698.68	3814.96	3700.62	3557.38	4857.35	5225.95	5035.1	4036.03	3934	3596.59
NM_001098402.2	60.9769	49.8558	45.3599	55.8645	57.3942	58.2471	41.3391	40.1555	40.0519	55.9104	28.2007	42.3896
NM_001098484.3	8.45225	18.5464	16.8	17.2236	19.7129	18.8641	0	8.60474	11.4434	17.472	4.70012	13.0429
NM_001098507.2	289.791	305.118	241.92	197.697	210.562	201.548	248.035	304.034	283.224	230.63	310.208	221.73
NM_001098511.3	207.08	223.553	214.704	241.73	231.67	220.743	93.013	100.389	94.4081	111.821	155.104	110.865
NM_001098536.2	187.761	195.435	209.328	203.089	189.453	192.282	206.696	243.801	268.92	290.035	310.208	296.727
NM_001098616.3	54.9396	51.6506	57.1199	63.353	59.8365	51.2972	25.8369	45.892	48.6345	59.4048	75.202	52.1718
NM_001098638.2	27.7717	24.7285	18.816	25.0117	23.0275	29.1236	20.6696	31.5507	37.1911	27.9552	28.2007	55.4325
NM_001098811.2	28.9791	23.3325	22.176	18.8711	17.4451	20.1879	31.0043	22.946	5.7217	31.4496	9.40025	26.0859
NM_001098816.3	49.506	37.4916	31.584	37.5925	39.2514	38.7211	72.3435	57.3649	54.3562	66.3936	47.0012	97.8221
NM_001099269.3	12.6784	11.1677	11.424	21.2675	17.794	28.4617	15.5022	17.2095	14.3043	6.9888	47.0012	35.8681
NM_001099271.2	10.2634	17.9481	14.112	28.0071	26.8654	26.476	5.16739	11.473	48.6345	48.9216	37.601	42.3896
NM_001099272.2	33.2053	31.11	27.552	43.8828	41.5192	31.1092	15.5022	48.7602	34.3302	27.9552	23.5006	22.8251
NM_001099274.3	16.3008	18.5464	25.2	18.7213	19.364	24.1593	10.3348	8.60474	8.58256	10.4832	23.5006	32.6074
NM_001099286.3	10.2634	13.9596	13.44	27.5578	24.2486	20.5189	0	20.0777	11.4434	13.9776	14.1004	9.78221
NM_001099334.3	9.65971	11.5665	9.07199	22.0163	19.364	16.2165	15.5022	20.0777	8.58256	6.9888	9.40025	13.0429
NM_001099402.2	59.1657	51.85	53.4239	66.3485	64.0234	64.5351	41.3391	54.4967	34.3302	62.8992	47.0012	22.8251
NM_001099415.3	79.0889	70.197	66.8639	44.9312	52.5096	58.2471	175.691	114.73	120.156	87.36	84.6022	107.604
NM_001099625.2	17.5082	19.3441	18.816	16.6246	16.7473	25.8141	25.8369	31.5507	14.3043	31.4496	9.40025	29.3466
NM_001099645.2	134.028	165.92	157.248	166.994	178.986	157.863	129.185	149.149	157.347	136.282	117.503	136.951
NM_001099652.2	18.112	14.9567	18.48	6.1406	6.45467	6.28804	31.0043	17.2095	31.4694	10.4832	9.40025	6.52147
NM_001099658.2	257.19	278.395	261.408	374.277	355.356	334.259	124.017	103.257	180.234	188.698	211.506	215.209
NM_001099666.2	42.2612	49.8558	48.3839	38.0418	34.8901	38.0592	51.6739	43.0237	28.6085	10.4832	42.3011	35.8681
NM_001099673.3	59.1657	54.8414	55.7759	67.0973	73.7926	56.9233	20.6696	17.2095	22.8868	10.4832	18.8005	26.0859
NM_001099678.2	34.4127	39.6852	32.256	36.5441	31.4011	36.4044	46.5065	22.946	14.3043	38.4384	28.2007	39.1288
NM_001099695.2	36.8276	37.8904	30.912	24.5624	27.7376	30.7783	139.52	146.281	134.46	178.214	159.804	172.819
NM_001099771.2	528.265	288.565	412.943	327.249	414.669	515.288	0	17.2095	22.8868	38.4384	37.601	32.6074
NM_001099922.3	36.2239	38.6881	36.624	42.2354	44.6593	39.383	31.0043	34.419	28.6085	52.416	75.202	35.8681
NM_001100164.2	16.9045	24.5291	24.192	28.9058	31.4011	22.8355	31.0043	45.892	31.4694	27.9552	32.9009	55.4325
NM_001100389.2	11.4709	11.1677	9.40799	15.1268	16.2239	19.526	0	2.86825	8.58256	3.4944	0	6.52147
NM_001100399.2	283.15	259.848	275.856	249.219	256.442	244.572	155.022	223.723	205.981	262.08	197.405	202.166
NM_001100420.2	19.3194	13.9596	15.12	17.673	16.2239	18.8641	5.16739	11.473	5.7217	17.472	0	6.52147
NM_001100423.2	161.196	160.137	161.28	154.713	174.451	210.153	124.017	103.257	114.434	118.81	145.704	123.908
NM_001100427.2	143.084	139.796	136.416	185.266	191.896	157.201	98.1804	117.598	94.4081	174.72	122.203	101.083
NM_001100588.3	31.9978	35.6968	33.936	56.164	57.9176	58.909	98.1804	126.203	102.991	115.315	131.603	97.8221
NM_001100623.2	100.219	99.1133	100.128	99.8971	104.496	102.263	134.352	137.676	80.1039	129.293	178.605	107.604
NM_001100624.3	77.8814	74.7837	74.2559	61.8553	61.0577	70.1613	46.5065	14.3412	48.6345	31.4496	9.40025	13.0429
NM_001100913.3	24.1493	22.3354	19.152	24.5624	29.831	31.4402	134.352	88.9157	68.6604	80.3712	75.202	107.604
NM_001101.5	10146.3	9345.97	9456.71	9658.27	10020.3	10656.2	17543.3	16437.9	17162.3	18052.1	16661.9	16108
NM_001101662.2	288.584	295.545	283.584	358.701	362.508	364.706	232.533	261.01	283.224	380.89	310.208	303.248
NM_001101669.3	15.697	22.136	17.808	15.5762	22.1552	18.8641	10.3348	17.2095	31.4694	24.4608	18.8005	26.0859
NM_001102368.3	15.0933	15.9539	10.752	14.5278	17.9684	19.1951	51.6739	37.2872	22.8868	59.4048	47.0012	32.6074
NM_001102371.2	20.5269	22.9337	20.16	30.5532	29.4821	28.1307	36.1717	11.473	34.3302	20.9664	37.601	39.1288
NM_001102401.4	38.0351	31.11	31.92	31.3021	30.7033	30.7783	36.1717	25.8142	48.6345	20.9664	18.8005	39.1288
NM_001102420.3	232.437	187.657	206.304	126.556	146.015	148.265	113.683	54.4967	123.017	52.416	61.1016	55.4325
NM_001102559.2	12.6784	11.9654	7.05599	10.9333	10.8159	13.8999	0	8.60474	0	10.4832	9.40025	13.0429
NM_001102564.3	20.5269	17.5492	16.128	21.567	21.8063	23.1665	10.3348	17.2095	2.86085	20.9664	14.1004	16.3037
NM_001102575.2	48.2986	34.1014	36.624	29.2053	30.3544	28.7926	46.5065	45.892	51.4953	34.944	61.1016	58.6932
NM_001103146.3	101.427	96.122	105.84	51.6709	66.1168	65.528	165.356	174.963	157.347	45.4272	94.0025	68.4754
NM_001104631.2	148.518	137.801	125.328	57.3622	64.5467	59.5709	124.017	123.335	137.321	73.3824	75.202	71.7362
NM_001104647.3	16.9045	19.5435	22.176	16.325	14.3049	15.8856	20.6696	8.60474	11.4434	27.9552	32.9009	19.5644
NM_001105079.3	19.3194	22.136	23.184	16.4748	15.0027	19.857	46.5065	88.9157	74.3821	45.4272	42.3011	88.0399
NM_001105192.3	59.1657	53.246	56.1119	28.9058	30.3544	31.7711	149.854	106.125	108.712	66.3936	51.7014	58.6932
NM_001105203.2	23.5455	18.3469	15.792	16.7743	14.1305	14.2308	72.3435	48.7602	31.4694	34.944	56.4015	32.6074
NM_001105206.3	30.1866	34.1014	31.92	29.8044	28.9588	31.4402	25.8369	20.0777	17.1651	13.9776	18.8005	26.0859
NM_001105244.2	13.2821	12.9625	14.112	16.9241	20.5852	22.1736	20.6696	20.0777	17.1651	27.9552	4.70012	26.0859
NM_001105539.3	88.1449	81.7635	72.5759	93.457	89.4931	95.6444	103.348	51.6284	77.243	87.36	56.4015	94.5613
NM_001105562.3	161.8	165.521	160.944	130.301	148.283	155.877	201.528	183.568	217.425	213.158	244.406	208.687
NM_001105564.2	6.64105	11.3671	11.76	15.1268	12.9093	15.8856	46.5065	17.2095	28.6085	59.4048	23.5006	19.5644
NM_001105573.2	12.0746	11.766	10.752	14.9771	12.0371	13.5689	20.6696	5.73649	5.7217	10.4832	4.70012	19.5644
NM_001106.4	16.3008	23.7314	23.856	20.3688	25.6442	22.8355	41.3391	43.0237	80.1039	55.9104	65.8017	55.4325
NM_001107.5	15.0933	13.7602	11.76	13.6291	10.8159	14.8927	5.16739	8.60474	5.7217	0	4.70012	6.52147
NM_001109689.4	12.0746	8.97405	10.416	8.23739	7.32692	7.28089	20.6696	8.60474	14.3043	20.9664	18.8005	13.0429
NM_001110.4	309.714	314.49	301.056	356.904	345.063	335.914	191.193	169.227	145.903	153.754	117.503	172.819
NM_001110303.4	16.3008	13.7602	11.088	13.4794	11.1648	13.5689	10.3348	25.8142	14.3043	17.472	42.3011	16.3037
NM_001110556.2	1365.04	1375.02	1370.88	1083.44	1400.66	1247.68	3012.59	3017.4	2935.23	2418.13	2617.97	2823.8
NM_001110792.2	23.5455	10.7689	15.456	5.99083	8.89698	12.2451	10.3348	11.473	28.6085	6.9888	14.1004	6.52147
NM_001111.5	234.852	217.571	250.992	218.366	245.103	236.96	335.88	269.615	217.425	304.013	352.509	329.334
NM_001111020.3	117.124	112.874	127.68	87.9155	96.6456	90.0183	134.352	131.939	120.156	115.315	103.403	120.647
NM_001111067.4	19.9232	17.7487	15.456	29.0555	27.7376	34.4187	0	11.473	17.1651	10.4832	18.8005	13.0429
NM_001111077.2	228.211	186.86	200.928	262.848	262.199	196.584	222.198	229.46	137.321	230.63	169.204	234.773
NM_001112732.3	25.3567	37.0927	36.288	28.9058	27.5632	30.4474	62.0087	111.862	82.9647	59.4048	61.1016	84.7791
NM_001113378.2	254.171	249.478	242.256	294.749	286.622	291.897	232.533	209.382	297.529	342.451	314.908	244.555
NM_001113407.3	114.105	123.642	112.224	84.6205	87.0508	99.9467	103.348	108.993	114.434	101.338	79.9021	133.69
NM_001113490.2	61.5807	55.6391	53.0879	49.1248	60.7088	59.5709	72.3435	54.4967	100.13	87.36	131.603	88.0399
NM_001113491.2	211.306	220.562	247.968	178.677	195.385	268.731	201.528	263.879	180.234	178.214	188.005	260.859
NM_001113528.2	21.7343	24.1302	25.536	17.8227	21.8063	19.1951	46.5065	25.8142	31.4694	34.944	23.5006	9.78221
NM_001113738.2	12.0746	9.57231	10.08	8.68671	13.0838	11.9142	10.3348	22.946	25.7477	0	32.9009	13.0429
NM_001114092.2	63.9956	73.7866	68.5439	123.86	128.57	126.092	87.8456	80.3109	57.217	122.304	131.603	117.386
NM_001114118.3	68.2217	68.801	67.5359	34.8966	36.8091	36.0735	25.8369	60.2332	20.026	48.9216	28.2007	71.7362
NM_001114120.3	41.0538	57.8327	48.7199	50.323	47.2761	41.3687	20.6696	20.0777	22.8868	24.4608	32.9009	13.0429
NM_001114122.3	149.122	149.567	150.192	178.077	161.018	159.518	77.5108	140.544	120.156	125.798	117.503	130.429
NM_001114394.3	21.1306	23.9308	23.52	19.9195	18.1429	19.526	15.5022	11.473	14.3043	20.9664	23.5006	19.5644
NM_001114600.3	12.0746	16.1533	17.472	12.431	13.0838	13.8999	25.8369	25.8142	28.6085	13.9776	0	13.0429
NM_001115016.3	59.1657	54.8414	46.0319	31.9012	34.8901	41.3687	82.6782	88.9157	60.0779	80.3712	79.9021	104.344
NM_001116.4	10.8672	13.3614	9.74399	8.53693	11.1648	11.9142	41.3391	34.419	22.8868	13.9776	14.1004	26.0859
NM_001122.4	24.753	22.5348	22.848	35.3459	33.669	40.3758	20.6696	31.5507	14.3043	31.4496	23.5006	22.8251
NM_001122630.2	22.9418	20.5406	22.176	8.38716	15.0027	9.92848	41.3391	37.2872	51.4953	20.9664	18.8005	22.8251
NM_001122659.3	232.437	208.198	214.032	212.824	208.817	211.146	118.85	154.885	197.399	164.237	122.203	117.386
NM_001122764.3	16.3008	12.5637	13.104	9.88487	11.1648	12.2451	15.5022	22.946	40.0519	17.472	18.8005	6.52147
NM_001122769.3	12.6784	8.5752	12.432	9.58533	9.42033	5.95709	0	14.3412	0	6.9888	0	3.26074
NM_001122955.4	142.481	144.582	139.776	106.787	106.589	128.408	196.361	174.963	157.347	111.821	112.803	169.558
NM_001122964.3	132.821	129.426	126	138.987	123.685	141.977	46.5065	71.7062	71.5213	90.8544	65.8017	68.4754
NM_001123329.2	132.821	122.845	116.256	88.8141	99.7857	79.7588	139.52	108.993	77.243	94.3488	108.103	104.344
NM_001123363.4	465.477	192.244	311.136	117.72	165.379	161.503	661.426	504.812	477.762	192.192	202.105	176.08
NM_001123375.3	505.324	332.638	458.975	219.714	258.361	244.903	656.258	441.71	615.083	363.418	479.413	381.506
NM_001123385.2	194.402	250.675	257.376	107.985	120.894	117.818	258.369	232.328	251.755	150.259	197.405	211.948
NM_001124.3	57.9583	38.6881	38.64	27.7076	31.5756	26.476	139.52	88.9157	54.3562	59.4048	98.7026	84.7791
NM_001124767.2	12.0746	11.1677	11.424	15.5762	15.0027	13.8999	0	0	0	3.4944	0	22.8251
NM_001126.5	135.84	135.01	130.032	153.964	144.271	147.603	118.85	80.3109	125.877	143.27	98.7026	104.344
NM_001126111.3	32.6015	32.3066	29.904	29.3551	35.5879	29.4545	5.16739	22.946	17.1651	38.4384	18.8005	29.3466
NM_001126340.3	14.4896	14.159	16.464	8.53693	10.2926	12.5761	36.1717	54.4967	60.0779	38.4384	14.1004	13.0429
NM_001127.4	120.143	129.027	138.096	137.789	152.819	138.006	165.356	163.49	145.903	164.237	188.005	198.905
NM_001127178.3	31.9978	39.8846	36.96	40.8874	44.4849	41.3687	82.6782	60.2332	42.9128	55.9104	61.1016	65.2147
NM_001127202.4	74.8628	80.9658	72.2399	73.0881	76.2349	78.435	62.0087	68.8379	51.4953	41.9328	51.7014	61.954
NM_001127208.3	121.954	125.437	119.28	44.1824	43.4382	49.3115	170.524	189.304	131.599	48.9216	94.0025	45.6503
NM_001127211.3	27.1679	15.3556	21.504	19.1707	19.8874	19.857	25.8369	40.1555	8.58256	10.4832	4.70012	29.3466
NM_001127228.2	160.593	169.51	176.736	164.299	146.713	147.934	72.3435	103.257	102.991	90.8544	94.0025	91.3006
NM_001127453.2	39.8463	26.7227	33.6	32.65	35.239	26.145	15.5022	40.1555	31.4694	38.4384	56.4015	55.4325
NM_001127496.3	73.6553	112.076	82.9919	37.7422	43.2637	39.383	139.52	189.304	163.069	101.338	98.7026	78.2577
NM_001127649.3	11.4709	8.37578	14.112	11.083	10.8159	6.28804	36.1717	11.473	17.1651	13.9776	23.5006	19.5644
NM_001127671.2	242.096	296.343	298.704	475.073	487.415	447.444	196.361	103.257	160.208	213.158	230.306	228.251
NM_001127898.4	18.112	18.3469	16.128	17.9725	17.6195	22.8355	5.16739	22.946	14.3043	31.4496	14.1004	16.3037
NM_001128.6	277.113	262.84	247.968	249.219	238.648	225.708	253.202	261.01	323.276	258.586	249.107	254.337
NM_001128126.3	10.8672	9.37289	10.416	14.8273	14.8283	12.907	0	5.73649	8.58256	20.9664	0	9.78221
NM_001128148.3	217.343	206.602	216.72	208.481	198.35	174.079	165.356	143.412	114.434	125.798	220.906	149.994
NM_001128159.3	98.4083	91.3358	95.0879	106.337	96.6456	95.3134	46.5065	86.0474	71.5213	73.3824	37.601	71.7362
NM_001128174.3	9.65971	13.7602	15.792	14.9771	17.0962	15.8856	0	5.73649	17.1651	10.4832	4.70012	13.0429
NM_001128203.2	15.0933	19.5435	19.824	14.6775	17.2706	17.8713	5.16739	14.3412	8.58256	13.9776	9.40025	9.78221
NM_001128205.2	22.9418	15.9539	12.096	21.567	20.0618	20.8498	10.3348	20.0777	14.3043	6.9888	23.5006	6.52147
NM_001128214.2	17.5082	9.57231	12.432	12.2812	12.9093	15.2237	5.16739	5.73649	14.3043	10.4832	9.40025	3.26074
NM_001128219.3	52.5247	49.2575	55.7759	19.0209	19.5385	22.8355	72.3435	57.3649	74.3821	17.472	37.601	35.8681
NM_001128424.2	13.8858	9.37289	11.424	6.44014	9.24588	8.27374	25.8369	11.473	17.1651	13.9776	14.1004	6.52147
NM_001128431.4	32.6015	29.3152	31.248	22.1661	28.4354	30.4474	51.6739	43.0237	37.1911	45.4272	47.0012	48.911
NM_001128591.2	18.112	9.97116	11.76	9.88487	8.72253	11.5832	10.3348	2.86825	5.7217	0	0	6.52147
NM_001128626.2	34.4127	30.5118	36.624	28.3067	31.0522	32.433	36.1717	34.419	42.9128	76.8768	37.601	39.1288
NM_001128636.4	47.6948	44.6708	42.6719	50.1732	43.6126	51.6281	155.022	169.227	111.573	132.787	117.503	169.558
NM_001128917.2	78.4851	79.3704	64.1759	54.9659	52.8585	64.8661	56.8413	86.0474	62.9387	62.8992	61.1016	104.344
NM_001128918.3	93.5784	97.9168	87.0239	72.7886	79.8984	84.7231	93.013	100.389	94.4081	73.3824	75.202	81.5184
NM_001129.5	64.5993	61.0235	65.1839	39.9888	38.728	46.9948	62.0087	71.7062	88.6864	55.9104	32.9009	101.083
NM_001129993.3	36.8276	34.1014	34.944	36.3943	37.6813	32.1021	15.5022	40.1555	40.0519	52.416	70.5019	35.8681
NM_001129994.2	19.3194	21.5377	26.88	8.53693	9.24588	13.238	41.3391	37.2872	22.8868	38.4384	23.5006	26.0859
NM_001130.6	44.0724	66.8068	62.8319	56.3138	64.3723	92.3349	87.8456	63.1014	57.217	83.8656	65.8017	74.9969
NM_001130004.2	403.293	382.494	373.632	418.759	456.188	523.562	434.061	430.237	363.328	513.677	488.813	596.715
NM_001130009.3	21.7343	24.1302	24.192	38.3413	35.7624	33.4259	20.6696	22.946	40.0519	69.888	51.7014	81.5184
NM_001130021.3	101.427	97.3185	96.7679	105.588	105.368	101.601	149.854	143.412	131.599	178.214	169.204	146.733
NM_001130028.2	39.8463	34.3008	34.944	6.88946	8.02473	8.60469	41.3391	34.419	31.4694	3.4944	18.8005	13.0429
NM_001130031.2	12.0746	20.1417	16.8	33.0993	31.4011	29.4545	10.3348	22.946	8.58256	13.9776	18.8005	6.52147
NM_001130040.2	62.7881	70.7952	64.1759	73.6872	72.7459	89.0254	191.193	217.987	228.868	192.192	258.507	326.074
NM_001130053.5	131.01	141.79	153.888	106.487	110.078	118.48	284.206	212.25	274.642	223.642	159.804	241.294
NM_001130058.2	21.7343	18.3469	19.488	19.0209	20.4107	16.8784	10.3348	17.2095	20.026	31.4496	28.2007	35.8681
NM_001130072.2	30.1866	31.7083	30.576	27.5578	31.5756	43.3544	113.683	94.6522	111.573	52.416	84.6022	68.4754
NM_001130082.3	49.506	44.6708	46.3679	36.2445	45.3571	40.0449	170.524	189.304	91.5473	108.326	79.9021	114.126
NM_001130100.2	16.9045	15.3556	21.84	14.5278	13.7816	9.92848	62.0087	86.0474	65.7996	31.4496	14.1004	22.8251
NM_001130111.2	18.112	15.555	14.784	14.5278	11.8626	15.8856	72.3435	60.2332	57.217	80.3712	117.503	61.954
NM_001130142.2	25.9605	26.9221	28.56	28.6062	34.7157	31.1092	15.5022	22.946	25.7477	45.4272	23.5006	22.8251
NM_001130144.3	12.6784	11.9654	15.12	8.98625	12.386	13.238	36.1717	31.5507	28.6085	17.472	23.5006	16.3037
NM_001130145.3	138.858	132.417	130.704	90.9109	106.066	98.292	144.687	126.203	105.852	104.832	108.103	114.126
NM_001130158.3	185.346	235.319	223.104	224.656	233.24	223.722	129.185	195.041	157.347	185.203	155.104	169.558
NM_001130438.3	678.595	594.082	661.247	606.572	675.473	616.228	749.272	648.224	637.97	733.824	780.221	776.055
NM_001130445.3	35.6202	38.4887	40.9919	53.4682	50.0673	66.1899	118.85	68.8379	71.5213	87.36	94.0025	91.3006
NM_001130475.3	29.5829	34.3008	24.192	53.9175	49.544	50.9662	15.5022	14.3412	37.1911	34.944	65.8017	29.3466
NM_001130520.3	43.4687	58.0322	53.7599	63.0535	54.2541	66.8518	46.5065	65.9697	60.0779	83.8656	56.4015	42.3896
NM_001130528.3	223.985	194.438	212.016	238.285	237.078	229.679	351.382	229.46	165.929	293.53	277.307	299.988
NM_001130823.3	205.873	222.157	206.304	147.225	170.264	174.741	325.546	263.879	251.755	237.619	230.306	234.773
NM_001130842.2	49.506	59.0293	56.1119	29.9542	28.4354	33.0949	82.6782	43.0237	42.9128	27.9552	28.2007	39.1288
NM_001130864.2	23.5455	29.7141	27.888	30.5532	27.2143	26.476	20.6696	25.8142	17.1651	27.9552	28.2007	19.5644
NM_001130919.3	18.112	17.1504	19.488	19.62	21.6319	27.7998	5.16739	5.73649	8.58256	10.4832	18.8005	19.5644
NM_001130924.3	10.8672	17.5492	18.144	15.8757	17.6195	11.9142	67.1761	40.1555	42.9128	34.944	23.5006	55.4325
NM_001130929.2	42.865	54.8414	46.7039	63.8024	56.3475	62.8804	51.6739	28.6825	57.217	52.416	75.202	65.2147
NM_001130963.2	102.031	91.7347	89.0399	84.321	84.9574	85.054	87.8456	68.8379	45.7736	41.9328	51.7014	84.7791
NM_001130965.3	67.0142	56.0379	44.0159	54.6663	53.5563	51.9591	77.5108	63.1014	88.6864	104.832	75.202	65.2147
NM_001131007.2	92.371	100.31	100.464	99.8971	105.194	91.3421	20.6696	34.419	54.3562	80.3712	42.3011	71.7362
NM_001131016.2	60.9769	60.6247	64.1759	51.2216	60.3599	64.5351	165.356	183.568	148.764	122.304	150.404	163.037
NM_001131035.2	19.9232	19.9423	21.504	19.9195	17.794	17.2094	5.16739	5.73649	8.58256	6.9888	14.1004	6.52147
NM_001134225.2	24.753	29.9135	34.608	20.3688	22.853	17.8713	72.3435	63.1014	82.9647	62.8992	65.8017	71.7362
NM_001134231.2	113.502	123.842	100.464	146.326	162.239	185.332	242.867	223.723	171.651	209.664	244.406	257.598
NM_001134232.2	116.52	104.897	93.7439	141.983	137.641	128.077	62.0087	91.7839	60.0779	66.3936	94.0025	78.2577
NM_001134337.3	15.697	21.1389	15.456	13.4794	12.2115	9.92848	10.3348	31.5507	28.6085	13.9776	14.1004	13.0429
NM_001134375.2	41.0538	46.4656	48.0479	38.3413	37.8558	37.3973	10.3348	37.2872	14.3043	20.9664	47.0012	32.6074
NM_001134382.3	35.0164	37.8904	38.64	30.2537	34.3668	31.4402	56.8413	83.1792	71.5213	66.3936	70.5019	55.4325
NM_001134389.2	19.3194	21.1389	22.512	27.5578	29.3077	28.4617	5.16739	5.73649	20.026	27.9552	4.70012	22.8251
NM_001134398.2	36.2239	32.7054	33.936	26.2099	24.5975	29.1236	46.5065	43.0237	51.4953	52.416	32.9009	48.911
NM_001134438.2	99.6158	124.64	110.208	97.6506	103.275	97.6301	77.5108	123.335	91.5473	132.787	89.3024	130.429
NM_001134479.2	15.697	17.3498	17.472	110.231	106.24	102.263	0	2.86825	17.1651	80.3712	75.202	71.7362
NM_001134647.2	26.5642	28.7169	26.544	24.1131	22.6786	24.1593	10.3348	20.0777	14.3043	27.9552	14.1004	19.5644
NM_001134665.3	16.3008	14.5579	13.104	12.431	13.4327	13.8999	0	2.86825	8.58256	6.9888	9.40025	9.78221
NM_001134693.2	47.6948	55.2402	41.9999	29.3551	30.7033	44.0163	15.5022	14.3412	22.8868	10.4832	32.9009	58.6932
NM_001134831.2	20.5269	20.3412	23.52	19.3204	25.2953	24.4903	31.0043	40.1555	31.4694	76.8768	32.9009	35.8681
NM_001135036.2	23.5455	13.9596	25.536	16.4748	17.0962	17.8713	5.16739	20.0777	5.7217	10.4832	9.40025	16.3037
NM_001135179.2	9.65971	10.1706	11.76	7.93785	6.97802	9.92848	10.3348	28.6825	11.4434	10.4832	18.8005	13.0429
NM_001135553.4	13.2821	8.17635	12.096	8.38716	9.24588	10.2594	5.16739	2.86825	8.58256	10.4832	4.70012	13.0429
NM_001135570.3	13.2821	10.9683	8.73599	5.99083	7.32692	8.60469	10.3348	5.73649	20.026	0	0	3.26074
NM_001135586.1	20.5269	17.7487	23.856	21.1177	19.8874	18.5332	25.8369	14.3412	14.3043	27.9552	23.5006	13.0429
NM_001135629.3	27.7717	40.2835	41.6639	61.5558	60.7088	52.621	51.6739	43.0237	37.1911	59.4048	70.5019	55.4325
NM_001135638.2	155.159	151.562	158.592	95.5538	91.761	98.6229	139.52	120.466	100.13	69.888	75.202	81.5184
NM_001135651.3	100.823	102.902	95.4239	149.471	145.143	145.287	46.5065	65.9697	57.217	83.8656	131.603	117.386
NM_001135653.2	164.819	166.917	166.656	170.439	171.659	167.791	180.859	157.754	174.512	230.63	211.506	280.423
NM_001135673.4	105.653	111.677	101.136	76.2333	73.2692	62.2185	77.5108	97.5204	111.573	52.416	32.9009	48.911
NM_001135674.2	16.3008	20.3412	17.136	33.0993	30.5288	33.4259	0	0	8.58256	17.472	9.40025	19.5644
NM_001135726.3	23.5455	21.1389	19.824	17.8227	19.1896	18.2022	15.5022	37.2872	20.026	10.4832	14.1004	9.78221
NM_001135812.2	173.271	161.732	157.584	133.745	129.268	123.113	72.3435	111.862	117.295	76.8768	122.203	120.647
NM_001135993.2	16.3008	12.5637	14.112	11.8319	8.19918	9.26659	15.5022	14.3412	14.3043	6.9888	9.40025	9.78221
NM_001135998.3	88.1449	69.5987	71.2319	66.3485	76.2349	61.8876	77.5108	83.1792	42.9128	73.3824	84.6022	45.6503
NM_001136018.4	32.6015	32.506	33.936	41.187	39.6003	46.9948	25.8369	28.6825	51.4953	34.944	56.4015	16.3037
NM_001136035.4	14.4896	24.5291	21.84	19.3204	16.2239	23.1665	56.8413	43.0237	48.6345	24.4608	51.7014	52.1718
NM_001136044.2	16.9045	13.3614	9.07199	6.58991	9.24588	8.93564	25.8369	28.6825	25.7477	20.9664	14.1004	29.3466
NM_001136050.3	14.4896	12.7631	17.136	14.6775	13.4327	14.5618	15.5022	22.946	31.4694	10.4832	18.8005	16.3037
NM_001136108.3	10.8672	12.1648	11.424	15.5762	16.0495	14.8927	5.16739	20.0777	11.4434	48.9216	14.1004	22.8251
NM_001136139.4	44.0724	42.4771	46.3679	26.5094	30.3544	37.3973	165.356	123.335	151.625	122.304	112.803	65.2147
NM_001136156.2	29.5829	55.0408	35.616	61.2563	61.0577	63.5423	25.8369	34.419	37.1911	76.8768	65.8017	74.9969
NM_001136157.2	41.6575	42.4771	40.6559	38.6409	42.217	37.0663	46.5065	31.5507	25.7477	17.472	32.9009	48.911
NM_001136191.3	18.7157	13.9596	13.44	14.9771	13.7816	10.2594	36.1717	40.1555	31.4694	45.4272	56.4015	52.1718
NM_001136193.2	121.954	154.553	142.128	223.158	201.49	204.196	118.85	200.777	160.208	234.125	183.305	195.644
NM_001136200.2	20.5269	25.1273	22.848	22.4656	19.364	15.2237	10.3348	20.0777	28.6085	3.4944	9.40025	6.52147
NM_001136201.2	16.9045	18.5464	17.136	20.2191	19.8874	18.5332	41.3391	45.892	65.7996	48.9216	51.7014	42.3896
NM_001136203.2	32.6015	22.136	23.52	16.9241	17.4451	22.1736	20.6696	11.473	14.3043	6.9888	14.1004	22.8251
NM_001136223.3	35.6202	25.1273	33.264	42.5349	40.4725	30.4474	10.3348	31.5507	45.7736	45.4272	23.5006	39.1288
NM_001136262.2	20.5269	21.9366	30.24	28.3067	27.2143	25.4831	15.5022	8.60474	42.9128	24.4608	14.1004	19.5644
NM_001136265.2	103.842	70.5958	85.6799	17.9725	17.6195	22.8355	87.8456	51.6284	91.5473	24.4608	9.40025	19.5644
NM_001136472.2	18.7157	18.7458	17.472	9.7351	10.2926	13.238	25.8369	8.60474	11.4434	6.9888	23.5006	9.78221
NM_001136528.2	27.7717	26.3239	24.528	25.1615	25.6442	28.7926	31.0043	20.0777	25.7477	13.9776	14.1004	22.8251
NM_001137550.2	41.6575	32.1071	32.592	30.703	34.1923	34.4187	31.0043	20.0777	5.7217	20.9664	9.40025	22.8251
NM_001137608.3	18.112	18.9452	13.44	25.3113	27.5632	38.3901	15.5022	17.2095	11.4434	13.9776	28.2007	26.0859
NM_001137675.4	11.4709	11.5665	7.72799	8.68671	6.97802	9.59753	25.8369	43.0237	31.4694	41.9328	47.0012	19.5644
NM_001141947.3	13.2821	15.555	12.768	13.3296	14.3049	15.8856	20.6696	22.946	5.7217	17.472	28.2007	35.8681
NM_001141969.2	33.809	43.0754	39.3119	26.3597	27.9121	24.4903	67.1761	71.7062	62.9387	80.3712	70.5019	55.4325
NM_001141980.3	298.244	299.733	301.392	348.666	354.135	340.878	330.713	283.956	360.467	391.373	385.41	394.549
NM_001142276.2	912.239	949.454	976.751	1000.32	1014.43	1020.32	475.4	593.727	575.031	538.138	517.014	684.754
NM_001142286.2	97.2008	95.1249	85.6799	104.84	107.985	101.271	72.3435	68.8379	80.1039	94.3488	56.4015	78.2577
NM_001142327.2	42.865	55.4397	46.3679	37.4427	40.8214	46.3329	56.8413	91.7839	60.0779	101.338	122.203	74.9969
NM_001142416.2	62.7881	74.9831	74.2559	103.941	96.6456	96.6372	93.013	83.1792	85.8256	97.8432	141.004	68.4754
NM_001142524.2	24.1493	18.5464	20.16	32.7998	35.4135	32.1021	46.5065	22.946	17.1651	45.4272	32.9009	35.8681
NM_001142551.2	52.5247	53.246	55.4399	64.701	63.1511	54.2757	51.6739	80.3109	40.0519	55.9104	32.9009	91.3006
NM_001142556.2	186.553	192.643	184.464	234.242	243.184	225.377	165.356	157.754	188.816	181.709	159.804	153.255
NM_001142565.3	108.672	93.1306	85.3439	58.1111	61.0577	73.4708	134.352	131.939	105.852	87.36	94.0025	84.7791
NM_001142568.3	81.5038	67.6045	60.8159	51.9705	57.5687	62.8804	41.3391	60.2332	62.9387	52.416	37.601	58.6932
NM_001142569.3	13.8858	15.3556	9.40799	10.7835	8.02473	7.61184	31.0043	25.8142	31.4694	41.9328	18.8005	32.6074
NM_001142572.2	18.112	13.5608	23.856	32.7998	26.1676	31.4402	20.6696	8.60474	28.6085	13.9776	37.601	13.0429
NM_001142616.3	51.3172	64.2143	67.8719	59.459	65.7679	50.6353	72.3435	57.3649	54.3562	48.9216	79.9021	71.7362
NM_001142684.2	27.1679	28.3181	23.184	23.8136	25.2953	19.1951	20.6696	17.2095	8.58256	34.944	14.1004	22.8251
NM_001142725.2	13.2821	20.74	18.144	42.5349	41.1703	35.4116	10.3348	11.473	20.026	24.4608	32.9009	16.3037
NM_001142730.3	16.9045	23.3325	29.904	27.5578	26.5165	27.7998	46.5065	14.3412	77.243	20.9664	47.0012	16.3037
NM_001142749.3	12.0746	21.5377	22.512	23.9633	20.7596	17.5403	15.5022	17.2095	34.3302	27.9552	23.5006	19.5644
NM_001142782.2	27.7717	30.9106	21.168	24.4126	28.6099	21.5117	46.5065	25.8142	34.3302	27.9552	18.8005	32.6074
NM_001142930.2	275.905	268.025	266.112	277.525	279.993	270.386	129.185	163.49	171.651	272.563	183.305	185.862
NM_001142966.3	38.6388	53.6448	46.0319	70.542	55.9986	60.5638	103.348	154.885	131.599	164.237	150.404	156.515
NM_001143667.2	63.9956	79.5699	73.2479	91.0606	87.0508	76.4493	87.8456	83.1792	65.7996	94.3488	61.1016	48.911
NM_001143674.4	12.6784	25.3267	26.208	31.1523	30.7033	29.4545	15.5022	17.2095	14.3043	20.9664	4.70012	6.52147
NM_001143676.3	34.4127	9.97116	7.72799	14.2282	14.6538	13.8999	20.6696	14.3412	11.4434	20.9664	18.8005	16.3037
NM_001143688.3	48.2986	43.8731	41.9999	53.9175	48.1484	48.6496	31.0043	28.6825	28.6085	41.9328	37.601	45.6503
NM_001143775.2	28.3754	30.3123	34.944	27.7076	30.7033	34.4187	56.8413	48.7602	34.3302	48.9216	37.601	52.1718
NM_001143780.3	14.4896	17.3498	18.816	13.0301	15.0027	20.5189	20.6696	22.946	40.0519	66.3936	32.9009	32.6074
NM_001143820.2	74.259	41.2806	37.968	55.4152	55.8242	53.6138	25.8369	37.2872	48.6345	41.9328	28.2007	42.3896
NM_001143835.2	39.8463	47.2633	39.6479	31.9012	33.1456	34.4187	67.1761	57.3649	74.3821	55.9104	47.0012	52.1718
NM_001143842.2	43.4687	32.9048	37.632	35.4957	31.4011	38.3901	10.3348	11.473	2.86085	27.9552	14.1004	22.8251
NM_001143852.2	15.697	11.5665	11.088	6.1406	5.58242	9.59753	10.3348	11.473	0	0	9.40025	16.3037
NM_001143992.2	31.9978	34.1014	22.176	22.6154	23.8997	20.5189	51.6739	20.0777	42.9128	52.416	37.601	16.3037
NM_001143998.2	143.688	158.143	159.936	169.091	179.161	194.929	113.683	146.281	140.182	129.293	173.905	149.994
NM_001144.6	65.203	72.7895	67.5359	98.8487	89.6676	99.6158	139.52	74.5744	82.9647	115.315	108.103	97.8221
NM_001144060.2	133.425	133.614	107.856	64.2517	79.375	81.4136	211.863	209.382	177.373	150.259	141.004	163.037
NM_001144061.2	596.487	580.122	538.943	602.528	658.028	600.342	604.585	708.457	698.048	691.891	733.219	652.147
NM_001144068.2	8.45225	13.1619	12.432	21.8665	19.8874	29.4545	10.3348	17.2095	11.4434	41.9328	4.70012	9.78221
NM_001144072.2	47.0911	40.2835	48.0479	31.3021	37.5069	29.1236	36.1717	20.0777	11.4434	27.9552	28.2007	13.0429
NM_001144757.3	12.6784	14.9567	18.48	16.0255	16.3984	13.8999	20.6696	22.946	31.4694	13.9776	23.5006	19.5644
NM_001144758.3	70.6366	72.7895	74.2559	48.8253	50.9396	50.3043	180.859	195.041	188.816	108.326	155.104	130.429
NM_001144831.2	208.891	209.195	192.192	167.144	176.021	230.672	227.365	232.328	188.816	167.731	150.404	224.991
NM_001144877.3	12.0746	11.1677	14.784	10.9333	14.6538	18.5332	20.6696	8.60474	8.58256	17.472	9.40025	19.5644
NM_001144888.2	81.5038	54.2431	67.5359	49.1248	44.3104	42.3615	98.1804	94.6522	51.4953	80.3712	89.3024	58.6932
NM_001144952.2	74.259	90.7376	84.3359	83.8716	93.5055	95.9753	170.524	183.568	243.172	153.754	197.405	257.598
NM_001144955.2	24.753	20.74	20.832	32.65	35.0646	36.4044	5.16739	14.3412	20.026	27.9552	32.9009	6.52147
NM_001144967.3	25.3567	30.7112	31.248	18.5716	27.2143	25.1522	25.8369	17.2095	17.1651	20.9664	23.5006	39.1288
NM_001144989.2	15.697	16.5521	19.152	15.5762	18.3173	18.5332	25.8369	17.2095	20.026	41.9328	47.0012	42.3896
NM_001144995.2	15.697	11.5665	16.8	6.58991	8.37363	9.59753	56.8413	54.4967	65.7996	41.9328	23.5006	48.911
NM_001145064.3	28.3754	29.3152	24.528	14.5278	15.0027	16.2165	77.5108	63.1014	37.1911	24.4608	42.3011	61.954
NM_001145108.2	236.059	253.267	252	314.818	297.962	278.99	144.687	106.125	208.842	174.72	173.905	133.69
NM_001145191.2	9.05598	12.3642	15.12	24.7122	25.8187	20.1879	10.3348	8.60474	2.86085	6.9888	23.5006	16.3037
NM_001145206.2	21.1306	12.1648	11.088	7.33877	7.85028	8.60469	25.8369	11.473	28.6085	13.9776	4.70012	13.0429
NM_001145263.2	211.306	194.836	202.944	184.218	194.861	193.605	222.198	263.879	194.538	199.181	155.104	234.773
NM_001145306.2	149.726	160.336	161.28	175.981	165.03	159.518	118.85	97.5204	151.625	122.304	131.603	107.604
NM_001145312.3	31.3941	37.4916	46.0319	18.8711	19.7129	19.1951	46.5065	37.2872	51.4953	27.9552	23.5006	13.0429
NM_001145313.3	16.9045	13.7602	16.464	16.4748	14.6538	12.907	15.5022	22.946	8.58256	41.9328	14.1004	26.0859
NM_001145315.2	28.9791	42.876	42.6719	47.1778	48.3228	44.0163	25.8369	43.0237	57.217	55.9104	65.8017	97.8221
NM_001145344.1	17.5082	19.7429	18.816	23.6638	23.7253	21.8427	25.8369	28.6825	20.026	13.9776	32.9009	42.3896
NM_001145358.2	112.898	112.275	109.2	114.425	105.368	115.832	113.683	114.73	102.991	132.787	89.3024	143.472
NM_001145365.3	12.0746	10.37	8.73599	10.6337	12.0371	10.2594	0	22.946	17.1651	17.472	18.8005	26.0859
NM_001145374.2	13.8858	12.9625	10.752	8.68671	12.9093	12.2451	5.16739	11.473	11.4434	17.472	14.1004	22.8251
NM_001145418.2	92.9747	95.3243	82.3199	85.3693	84.4341	84.0612	263.537	143.412	114.434	174.72	188.005	153.255
NM_001145440.3	20.5269	10.5694	13.776	17.2236	14.8283	16.8784	5.16739	8.60474	8.58256	6.9888	4.70012	16.3037
NM_001145450.3	20.5269	11.5665	18.144	21.567	25.9931	23.1665	5.16739	2.86825	2.86085	3.4944	9.40025	6.52147
NM_001145543.2	21.7343	18.1475	15.792	31.1523	36.8091	26.145	62.0087	43.0237	34.3302	90.8544	70.5019	78.2577
NM_001145638.3	19.3194	16.951	17.808	10.6337	11.3393	10.5904	72.3435	57.3649	57.217	62.8992	28.2007	55.4325
NM_001145667.2	474.533	459.471	497.615	496.041	578.827	498.741	279.039	338.453	357.606	363.418	380.71	345.638
NM_001145860.2	33.809	29.1158	31.92	17.5232	22.3297	18.8641	72.3435	60.2332	48.6345	38.4384	42.3011	22.8251
NM_001146.5	10.2634	17.5492	21.168	14.378	13.7816	14.5618	41.3391	20.0777	25.7477	6.9888	4.70012	9.78221
NM_001146069.2	16.3008	30.1129	25.2	15.4264	20.9341	19.857	98.1804	45.892	65.7996	31.4496	37.601	13.0429
NM_001146070.2	29.5829	24.3296	30.576	38.6409	38.9025	42.6925	25.8369	11.473	14.3043	66.3936	14.1004	52.1718
NM_001146105.2	33.2053	27.321	30.576	40.5879	39.9492	39.052	25.8369	17.2095	31.4694	31.4496	28.2007	35.8681
NM_001146108.2	111.69	76.1797	99.7919	112.478	110.253	95.3134	103.348	63.1014	91.5473	48.9216	65.8017	42.3896
NM_001146154.2	11.4709	17.5492	11.76	20.5186	19.5385	22.1736	20.6696	11.473	31.4694	20.9664	18.8005	22.8251
NM_001146156.2	102.031	106.293	104.16	87.7657	101.181	95.6444	124.017	103.257	108.712	104.832	122.203	120.647
NM_001146213.3	105.049	94.726	103.824	101.545	101.705	75.4565	129.185	120.466	97.269	136.282	131.603	107.604
NM_001146274.2	39.2426	39.4858	40.3199	31.3021	31.4011	27.1379	46.5065	31.5507	57.217	27.9552	42.3011	35.8681
NM_001146334.2	40.45	29.5146	23.184	22.7652	32.6223	16.8784	77.5108	60.2332	91.5473	52.416	75.202	68.4754
NM_001148.6	131.614	155.151	150.192	138.838	133.455	142.308	129.185	163.49	185.955	178.214	141.004	238.034
NM_001151.4	39.8463	37.4916	47.3759	39.3897	38.728	47.3258	46.5065	43.0237	54.3562	34.944	37.601	74.9969
NM_001152.5	338.09	330.245	348.768	296.846	303.893	297.855	335.88	352.794	320.415	230.63	253.807	290.205
NM_001153484.2	35.0164	37.4916	39.3119	70.8416	64.1978	48.6496	20.6696	17.2095	25.7477	24.4608	32.9009	19.5644
NM_001154.4	618.221	540.038	557.759	458.748	443.104	454.063	537.409	616.673	617.944	447.283	432.411	456.503
NM_001155.5	556.037	537.446	533.903	553.852	604.297	595.378	413.391	490.47	391.937	440.294	394.81	560.847
NM_001156.5	134.028	137.602	140.784	158.757	158.401	165.144	124.017	166.358	183.095	188.698	122.203	166.298
NM_001159699.2	10.2634	11.3671	11.088	12.7305	12.0371	13.8999	0	8.60474	11.4434	6.9888	9.40025	19.5644
NM_001159702.3	8.45225	10.9683	12.768	11.9817	11.5137	13.238	0	8.60474	14.3043	10.4832	9.40025	29.3466
NM_001159773.2	18.7157	19.9423	26.208	18.5716	14.3049	22.5046	36.1717	25.8142	28.6085	31.4496	47.0012	32.6074
NM_001160148.2	36.8276	37.4916	33.936	13.9287	17.6195	20.5189	51.6739	48.7602	22.8868	13.9776	28.2007	35.8681
NM_001160372.4	28.3754	36.295	37.296	35.945	44.3104	42.0306	51.6739	37.2872	34.3302	66.3936	47.0012	71.7362
NM_001161.5	18.112	11.766	10.08	13.3296	9.76923	10.9213	0	11.473	8.58256	3.4944	18.8005	26.0859
NM_001161346.2	10.8672	15.555	18.48	15.8757	12.2115	22.5046	25.8369	40.1555	31.4694	52.416	70.5019	32.6074
NM_001162371.3	25.3567	21.3383	15.792	8.98625	14.6538	14.5618	31.0043	37.2872	17.1651	34.944	32.9009	35.8681
NM_001162383.2	42.2612	49.457	47.0399	41.9358	44.3104	40.7068	87.8456	106.125	71.5213	111.821	79.9021	81.5184
NM_001162498.3	15.0933	32.3066	27.552	13.1798	14.6538	12.5761	10.3348	20.0777	37.1911	6.9888	14.1004	9.78221
NM_001162499.2	15.697	10.7689	12.096	10.0346	8.72253	10.9213	10.3348	17.2095	25.7477	17.472	51.7014	19.5644
NM_001162501.2	84.5225	85.752	82.9919	64.5512	73.4437	87.0397	124.017	100.389	114.434	118.81	117.503	136.951
NM_001162529.3	39.2426	43.0754	34.944	35.7952	31.75	32.1021	31.0043	37.2872	34.3302	66.3936	70.5019	52.1718
NM_001162536.3	365.258	306.713	331.296	280.82	288.541	324.661	206.696	183.568	191.677	80.3712	159.804	179.34
NM_001163315.3	25.3567	22.5348	31.92	31.4519	29.6566	30.1164	25.8369	17.2095	20.026	31.4496	18.8005	19.5644
NM_001163424.2	37.4314	35.0985	36.288	39.9888	53.2074	36.0735	10.3348	5.73649	2.86085	3.4944	4.70012	9.78221
NM_001163435.3	63.9956	62.6189	52.0799	69.7932	80.2473	64.2042	56.8413	97.5204	60.0779	125.798	122.203	107.604
NM_001163735.2	12.0746	21.5377	17.136	14.5278	17.2706	15.8856	51.6739	43.0237	48.6345	41.9328	75.202	58.6932
NM_001163788.4	83.315	82.3618	77.2799	71.7402	72.7459	77.1112	31.0043	60.2332	34.3302	62.8992	70.5019	71.7362
NM_001164.5	59.1657	53.8443	52.4159	46.5787	45.0082	52.621	87.8456	86.0474	40.0519	108.326	98.7026	61.954
NM_001164094.2	23.5455	27.1216	35.616	26.809	30.5288	33.4259	5.16739	25.8142	25.7477	31.4496	28.2007	26.0859
NM_001164161.2	298.847	291.956	261.072	235.44	224.518	210.484	242.867	272.483	251.755	237.619	192.705	182.601
NM_001164211.2	11.4709	11.766	10.08	11.2328	7.32692	7.94279	5.16739	14.3412	11.4434	6.9888	14.1004	9.78221
NM_001164273.2	143.084	152.359	138.768	148.423	148.981	134.365	149.854	163.49	171.651	206.17	202.105	270.641
NM_001164380.2	90.5598	96.5208	95.4239	98.3994	107.636	104.911	129.185	97.5204	85.8256	122.304	89.3024	84.7791
NM_001164463.1	454.006	200.42	305.76	129.702	163.111	174.41	614.919	487.602	469.18	174.72	188.005	176.08
NM_001164473.3	218.551	216.574	215.376	164.149	134.676	166.799	175.691	157.754	140.182	115.315	65.8017	110.865
NM_001164664.2	18.112	21.3383	17.472	13.9287	18.3173	15.2237	25.8369	22.946	25.7477	24.4608	32.9009	32.6074
NM_001164665.2	53.7321	56.6362	46.0319	62.4544	65.419	68.5065	113.683	83.1792	88.6864	73.3824	98.7026	71.7362
NM_001164760.2	16.3008	11.1677	7.39199	8.98625	8.89698	8.60469	20.6696	20.0777	11.4434	3.4944	4.70012	6.52147
NM_001165963.4	21.1306	18.5464	13.104	11.9817	17.0962	18.5332	36.1717	37.2872	34.3302	41.9328	47.0012	52.1718
NM_001166.5	76.6739	89.541	87.6959	89.8625	100.832	98.6229	56.8413	60.2332	65.7996	94.3488	84.6022	65.2147
NM_001166037.2	27.1679	33.3037	35.952	55.1156	45.0082	51.2972	25.8369	17.2095	25.7477	31.4496	47.0012	29.3466
NM_001166105.3	21.7343	23.3325	21.84	52.5695	50.5907	53.9448	25.8369	28.6825	20.026	52.416	37.601	55.4325
NM_001166108.2	814.434	706.955	713.663	653.3	671.984	629.797	682.095	576.518	692.326	597.543	592.216	639.104
NM_001166114.2	22.9418	19.3441	15.792	16.1752	19.0151	20.1879	62.0087	51.6284	42.9128	17.472	32.9009	61.954
NM_001166160.2	27.1679	29.1158	27.552	21.1177	23.8997	20.5189	31.0043	31.5507	31.4694	34.944	51.7014	39.1288
NM_001166269.2	36.8276	36.0956	30.576	32.2007	36.4602	29.1236	31.0043	34.419	25.7477	38.4384	23.5006	22.8251
NM_001166271.3	38.6388	45.4685	44.3519	41.187	39.4258	39.052	175.691	111.862	114.434	97.8432	141.004	97.8221
NM_001166293.2	62.1844	55.6391	60.8159	55.565	53.2074	46.3329	46.5065	68.8379	34.3302	69.888	47.0012	42.3896
NM_001166412.2	135.236	96.5208	106.512	103.042	91.9354	111.53	72.3435	57.3649	65.7996	83.8656	65.8017	81.5184
NM_001166693.3	44.6762	35.0985	39.3119	31.1523	32.0989	40.3758	15.5022	48.7602	34.3302	34.944	47.0012	52.1718
NM_001167.4	50.1097	55.2402	47.7119	55.8645	58.7898	47.9877	41.3391	43.0237	34.3302	62.8992	70.5019	42.3896
NM_001167608.3	16.3008	15.9539	9.40799	17.8227	16.2239	17.8713	5.16739	34.419	11.4434	31.4496	18.8005	26.0859
NM_001167675.2	67.618	64.0149	61.4879	70.3923	65.5934	65.197	82.6782	43.0237	100.13	41.9328	70.5019	39.1288
NM_001167740.2	24.1493	16.7516	20.496	18.5716	19.364	20.8498	5.16739	11.473	14.3043	10.4832	4.70012	19.5644
NM_001167856.3	172.064	147.374	154.56	123.86	117.231	112.523	124.017	114.73	91.5473	101.338	89.3024	120.647
NM_001168.3	89.956	83.5583	96.4319	70.6918	66.989	84.7231	108.515	108.993	97.269	76.8768	75.202	55.4325
NM_001168241.2	13.8858	14.5579	12.096	10.0346	6.62912	5.95709	103.348	60.2332	60.0779	45.4272	23.5006	52.1718
NM_001168243.4	9.05598	12.7631	14.112	9.28579	12.7349	10.2594	31.0043	11.473	17.1651	3.4944	9.40025	16.3037
NM_001168368.2	18.7157	12.9625	11.424	17.0739	20.4107	14.8927	20.6696	20.0777	11.4434	6.9888	18.8005	13.0429
NM_001168478.2	20.5269	22.3354	21.84	38.7906	40.2981	37.7282	10.3348	28.6825	14.3043	38.4384	28.2007	13.0429
NM_001168618.2	12.0746	15.9539	15.12	17.5232	16.9217	15.2237	0	11.473	2.86085	10.4832	14.1004	3.26074
NM_001170535.3	26.5642	28.1187	24.528	24.1131	30.8778	33.7568	77.5108	34.419	45.7736	45.4272	28.2007	48.911
NM_001170543.2	22.3381	18.9452	17.136	14.2282	16.5728	16.8784	36.1717	25.8142	20.026	10.4832	0	22.8251
NM_001170629.2	188.968	210.192	212.688	195.601	214.4	192.282	227.365	243.801	208.842	248.102	314.908	286.945
NM_001170795.4	44.6762	63.0177	69.8879	64.2517	67.5124	78.1041	56.8413	14.3412	42.9128	34.944	47.0012	48.911
NM_001171136.2	41.0538	35.0985	52.7519	18.4218	20.2363	23.4974	103.348	111.862	100.13	59.4048	70.5019	55.4325
NM_001171155.2	38.0351	31.11	38.304	31.7514	31.75	29.1236	87.8456	68.8379	102.991	62.8992	61.1016	71.7362
NM_001171251.3	15.0933	11.3671	9.74399	10.6337	12.9093	13.8999	36.1717	20.0777	8.58256	31.4496	28.2007	26.0859
NM_001171613.2	181.12	187.258	172.704	247.571	251.034	251.522	217.03	232.328	240.312	265.574	249.107	244.555
NM_001172173.2	20.5269	20.74	21.84	10.7835	6.62912	7.94279	25.8369	28.6825	22.8868	31.4496	4.70012	13.0429
NM_001172303.3	177.497	159.14	138.432	118.469	108.334	102.925	108.515	71.7062	88.6864	76.8768	126.903	61.954
NM_001172638.2	7.24478	11.5665	10.752	27.7076	23.2019	24.4903	5.16739	11.473	8.58256	10.4832	23.5006	16.3037
NM_001172773.2	9.05598	15.9539	16.128	22.6154	26.1676	27.4688	25.8369	20.0777	11.4434	17.472	18.8005	13.0429
NM_001172774.2	83.9187	86.9485	83.6639	109.482	105.891	99.9467	77.5108	45.892	82.9647	104.832	112.803	81.5184
NM_001173464.2	123.161	138.799	132.384	124.16	136.769	132.049	72.3435	91.7839	117.295	143.27	126.903	130.429
NM_001173524.2	356.806	340.415	320.88	416.662	408.912	369.671	351.382	304.034	280.363	349.44	291.408	273.902
NM_001174072.3	14.4896	17.3498	16.464	20.5186	20.7596	22.1736	5.16739	5.73649	5.7217	0	18.8005	16.3037
NM_001174096.2	115.313	120.452	115.92	97.8003	94.9011	102.594	77.5108	134.808	77.243	52.416	65.8017	84.7791
NM_001174100.2	16.9045	22.136	14.784	9.28579	11.1648	10.5904	31.0043	48.7602	37.1911	41.9328	37.601	52.1718
NM_001174150.2	28.3754	23.9308	22.512	15.5762	11.3393	12.5761	10.3348	17.2095	11.4434	13.9776	14.1004	0
NM_001174156.2	29.5829	40.0841	48.3839	60.6572	58.4409	46.9948	36.1717	25.8142	45.7736	41.9328	51.7014	32.6074
NM_001177.6	70.6366	66.6074	68.8799	66.0489	56.3475	68.1756	46.5065	65.9697	31.4694	48.9216	47.0012	32.6074
NM_001177306.2	557.245	650.12	663.599	866.274	825.849	817.445	315.211	507.68	340.441	506.688	418.311	472.807
NM_001177382.2	19.9232	17.5492	15.456	13.4794	11.3393	13.5689	15.5022	17.2095	28.6085	24.4608	9.40025	35.8681
NM_001177479.2	14.4896	19.7429	17.136	15.2766	15.5261	12.907	20.6696	8.60474	25.7477	13.9776	32.9009	16.3037
NM_001177701.3	16.9045	18.5464	22.848	19.1707	19.364	14.8927	10.3348	8.60474	20.026	17.472	9.40025	13.0429
NM_001178139.2	82.7113	101.307	97.1039	67.9959	74.8393	76.1184	82.6782	51.6284	71.5213	48.9216	47.0012	52.1718
NM_001182.5	214.929	200.021	217.728	213.573	218.412	203.865	160.189	149.149	200.26	160.742	178.605	189.123
NM_001183.6	152.14	178.883	170.688	144.828	139.735	155.546	170.524	152.017	163.069	164.237	211.506	140.212
NM_001184.4	89.3523	87.5468	76.9439	90.6113	85.3063	83.3993	82.6782	114.73	102.991	139.776	230.306	136.951
NM_001184742.2	80.2963	81.3647	77.9519	78.9292	71.0014	63.2113	62.0087	80.3109	80.1039	69.888	84.6022	61.954
NM_001184785.2	102.031	86.9485	126.672	116.971	113.393	127.746	108.515	91.7839	128.738	97.8432	89.3024	91.3006
NM_001184819.2	64.5993	68.801	79.9679	63.8024	69.2569	59.9019	103.348	111.862	105.852	97.8432	126.903	68.4754
NM_001184880.2	21.1306	17.7487	16.128	11.2328	14.4794	14.5618	25.8369	14.3412	28.6085	0	18.8005	19.5644
NM_001184900.3	7.84851	12.5637	11.424	14.6775	17.2706	13.238	15.5022	25.8142	14.3043	10.4832	14.1004	9.78221
NM_001184940.2	17.5082	19.9423	26.544	15.2766	16.5728	15.8856	15.5022	17.2095	22.8868	13.9776	23.5006	26.0859
NM_001184970.3	57.9583	64.8125	60.8159	46.7285	51.8118	50.9662	82.6782	43.0237	68.6604	59.4048	56.4015	88.0399
NM_001184989.2	55.5433	75.1826	66.8639	75.784	71.5247	69.1684	41.3391	40.1555	22.8868	6.9888	23.5006	42.3896
NM_001185072.3	24.1493	28.3181	22.848	19.9195	26.1676	20.8498	0	14.3412	11.4434	20.9664	23.5006	3.26074
NM_001185181.3	30.7903	24.7285	22.848	36.0948	30.8778	32.764	46.5065	22.946	22.8868	24.4608	18.8005	9.78221
NM_001186.4	105.049	84.1566	85.0079	77.4315	74.3159	78.766	144.687	88.9157	82.9647	76.8768	89.3024	48.911
NM_001190.4	16.3008	19.1446	18.48	21.7168	23.7253	20.1879	31.0043	28.6825	17.1651	24.4608	9.40025	16.3037
NM_001190274.2	227.003	207.4	199.584	210.877	216.493	182.684	144.687	152.017	205.981	171.226	131.603	149.994
NM_001190467.2	10.8672	21.3383	13.44	11.6821	14.3049	20.1879	25.8369	25.8142	31.4694	20.9664	47.0012	32.6074
NM_001190737.2	38.0351	35.8962	30.576	35.7952	33.669	32.764	41.3391	22.946	31.4694	38.4384	42.3011	32.6074
NM_001190850.2	32.6015	36.295	29.568	21.1177	18.6662	26.145	51.6739	34.419	57.217	17.472	18.8005	29.3466
NM_001190946.3	15.0933	16.1533	14.112	11.083	10.2926	12.5761	118.85	22.946	45.7736	31.4496	56.4015	35.8681
NM_001191057.4	32.6015	30.5118	32.928	35.6454	33.8434	37.3973	15.5022	22.946	40.0519	45.4272	47.0012	45.6503
NM_001191061.2	22.3381	17.7487	15.456	11.8319	12.5604	13.238	56.8413	31.5507	22.8868	17.472	37.601	35.8681
NM_001193315.2	22.3381	22.9337	21.504	26.0601	35.0646	30.1164	10.3348	17.2095	20.026	48.9216	18.8005	55.4325
NM_001193360.2	28.3754	37.8904	30.912	29.3551	26.6909	31.4402	10.3348	25.8142	25.7477	17.472	37.601	6.52147
NM_001193369.2	147.311	123.443	116.592	71.5904	69.7802	82.4064	201.528	229.46	177.373	97.8432	192.705	101.083
NM_001193424.2	54.9396	41.8789	45.3599	47.4773	43.6126	46.9948	41.3391	28.6825	45.7736	48.9216	32.9009	32.6074
NM_001193489.2	69.4292	63.8154	70.8959	67.0973	59.8365	66.8518	46.5065	34.419	60.0779	69.888	61.1016	65.2147
NM_001193511.2	15.697	13.5608	10.08	11.3826	8.72253	9.92848	46.5065	43.0237	8.58256	27.9552	18.8005	29.3466
NM_001193552.2	22.3381	30.7112	32.928	75.6342	85.4808	91.3421	10.3348	22.946	20.026	76.8768	89.3024	68.4754
NM_001194998.2	28.3754	29.3152	31.248	26.6592	29.831	28.7926	56.8413	54.4967	48.6345	52.416	56.4015	26.0859
NM_001195248.2	24.1493	19.1446	26.208	27.7076	30.1799	23.1665	10.3348	25.8142	17.1651	17.472	18.8005	48.911
NM_001195305.3	9.65971	15.3556	14.784	14.6775	16.5728	11.5832	0	11.473	11.4434	20.9664	0	3.26074
NM_001195427.2	184.742	160.336	156.912	101.545	117.754	102.594	325.546	220.855	306.111	153.754	159.804	156.515
NM_001195518.2	66.4105	74.7837	78.9599	90.4616	87.0508	96.3063	46.5065	37.2872	45.7736	104.832	56.4015	94.5613
NM_001195553.2	41.0538	33.7025	37.296	36.5441	40.9959	39.7139	36.1717	28.6825	40.0519	24.4608	47.0012	29.3466
NM_001195626.3	28.3754	36.8933	25.2	29.9542	33.1456	28.1307	56.8413	51.6284	34.3302	76.8768	65.8017	74.9969
NM_001197026.2	26.5642	15.1562	14.448	24.7122	20.7596	21.8427	20.6696	17.2095	42.9128	20.9664	18.8005	35.8681
NM_001197104.2	191.383	183.071	166.656	144.229	138.165	134.035	299.709	435.974	274.642	307.507	380.71	371.724
NM_001197293.3	787.87	676.842	728.111	649.107	723.272	694.994	800.945	722.798	760.987	510.183	695.618	678.233
NM_001197294.2	613.392	469.243	495.935	526.444	521.607	512.972	630.422	407.291	417.684	447.283	446.512	414.113
NM_001198533.2	35.0164	33.9019	37.296	32.7998	33.669	28.1307	41.3391	22.946	11.4434	17.472	18.8005	26.0859
NM_001198800.3	63.9956	54.0437	45.6959	57.6618	60.1854	64.5351	46.5065	63.1014	65.7996	62.8992	47.0012	39.1288
NM_001198934.2	8.45225	11.1677	10.752	8.98625	9.59478	12.2451	25.8369	40.1555	60.0779	55.9104	94.0025	32.6074
NM_001198950.3	13.2821	16.5521	17.808	13.3296	16.2239	12.5761	36.1717	17.2095	11.4434	31.4496	47.0012	22.8251
NM_001198956.2	33.2053	30.7112	31.248	30.4035	30.0055	37.0663	31.0043	34.419	25.7477	27.9552	4.70012	22.8251
NM_001199.4	16.3008	13.1619	14.112	13.9287	17.2706	20.1879	41.3391	28.6825	25.7477	55.9104	23.5006	26.0859
NM_001199135.3	30.1866	25.7256	26.544	16.1752	19.0151	17.2094	20.6696	20.0777	5.7217	10.4832	18.8005	19.5644
NM_001199140.2	31.3941	33.3037	36.288	13.7789	14.4794	11.5832	25.8369	34.419	28.6085	13.9776	23.5006	16.3037
NM_001199161.2	42.2612	40.4829	39.6479	40.1386	35.7624	35.4116	46.5065	94.6522	77.243	94.3488	65.8017	65.2147
NM_001199165.4	30.7903	42.4771	45.6959	50.7723	52.8585	47.6567	20.6696	68.8379	51.4953	34.944	18.8005	42.3896
NM_001199196.2	41.6575	38.4887	42.6719	30.703	36.8091	34.7497	36.1717	80.3109	54.3562	34.944	18.8005	58.6932
NM_001199198.3	54.9396	61.0235	58.7999	71.89	71.0014	73.8017	36.1717	51.6284	37.1911	34.944	37.601	61.954
NM_001199251.3	51.3172	55.0408	50.7359	42.8344	44.8338	42.3615	31.0043	40.1555	31.4694	13.9776	23.5006	48.911
NM_001199260.2	25.9605	32.3066	27.888	20.9679	24.2486	29.7855	25.8369	22.946	17.1651	10.4832	28.2007	35.8681
NM_001199261.3	66.4105	77.9745	66.5279	93.7565	87.3997	94.3206	20.6696	45.892	28.6085	20.9664	32.9009	45.6503
NM_001199298.2	24.1493	23.1331	19.488	20.5186	20.0618	21.5117	10.3348	31.5507	11.4434	13.9776	18.8005	19.5644
NM_001199383.2	131.614	159.539	164.304	138.838	136.071	132.38	93.013	140.544	131.599	115.315	84.6022	172.819
NM_001199397.3	26.5642	33.7025	31.248	35.945	39.7747	32.433	31.0043	25.8142	14.3043	20.9664	32.9009	26.0859
NM_001199417.2	19.9232	25.5262	23.856	22.0163	23.0275	29.4545	41.3391	71.7062	45.7736	59.4048	65.8017	136.951
NM_001199753.2	17.5082	27.1216	24.528	19.1707	23.5508	27.7998	46.5065	40.1555	40.0519	24.4608	56.4015	42.3896
NM_001199867.2	15.697	13.7602	11.088	8.98625	10.1181	15.2237	51.6739	51.6284	45.7736	10.4832	28.2007	39.1288
NM_001201338.2	257.794	203.611	225.792	122.363	130.315	153.892	139.52	157.754	114.434	48.9216	79.9021	107.604
NM_001201380.3	7.24478	12.3642	9.74399	14.6775	18.4918	15.2237	20.6696	5.73649	11.4434	34.944	28.2007	29.3466
NM_001201543.2	26.5642	24.9279	20.832	38.4911	35.5879	29.4545	20.6696	5.73649	28.6085	31.4496	14.1004	19.5644
NM_001202438.2	71.8441	82.1624	76.9439	59.9083	53.7308	54.2757	72.3435	74.5744	88.6864	101.338	70.5019	71.7362
NM_001202439.3	15.0933	14.159	10.752	15.4264	15.0027	14.5618	36.1717	20.0777	20.026	13.9776	28.2007	6.52147
NM_001203.3	39.8463	39.2864	35.952	34.5971	33.669	31.4402	41.3391	31.5507	25.7477	27.9552	42.3011	39.1288
NM_001204.7	134.028	119.255	121.968	49.4244	44.8338	43.0234	237.7	154.885	163.069	73.3824	70.5019	48.911
NM_001204077.2	95.9934	107.489	91.0559	133.296	118.975	125.43	82.6782	86.0474	94.4081	157.248	75.202	91.3006
NM_001205.3	13.8858	17.7487	14.448	13.7789	14.4794	18.5332	0	17.2095	17.1651	6.9888	4.70012	3.26074
NM_001205019.2	12.6784	18.3469	15.12	17.9725	18.3173	16.8784	10.3348	17.2095	5.7217	38.4384	18.8005	26.0859
NM_001206427.2	113.502	133.614	120.96	170.739	160.843	141.977	31.0043	80.3109	34.3302	55.9104	56.4015	45.6503
NM_001206641.3	25.3567	25.3267	18.48	28.6062	32.0989	31.4402	20.6696	14.3412	14.3043	17.472	14.1004	16.3037
NM_001206998.2	22.3381	24.3296	25.536	13.6291	10.8159	16.5475	124.017	65.9697	71.5213	45.4272	61.1016	52.1718
NM_001206999.2	118.935	116.862	106.176	96.0031	109.729	108.882	118.85	177.831	143.043	129.293	126.903	146.733
NM_001207067.2	688.254	642.94	615.551	895.18	921.797	805.531	656.258	533.494	595.057	985.421	827.222	629.322
NM_001211.6	294.017	270.418	285.6	231.246	234.81	229.679	196.361	223.723	246.033	157.248	211.506	208.687
NM_001212.4	242.7	231.331	266.112	244.126	242.661	240.931	206.696	269.615	217.425	178.214	244.406	169.558
NM_001214909.2	140.066	136.405	144.816	32.2007	31.2267	33.7568	366.885	324.112	340.441	73.3824	37.601	52.1718
NM_001218.5	10.2634	24.7285	17.136	18.4218	20.0618	25.1522	20.6696	8.60474	8.58256	17.472	14.1004	19.5644
NM_001219.5	463.062	414.003	466.031	494.693	473.633	473.589	325.546	341.321	306.111	311.002	300.808	326.074
NM_001226.4	41.0538	36.6939	29.904	52.27	52.8585	53.2829	10.3348	8.60474	25.7477	20.9664	18.8005	9.78221
NM_001227.5	9.05598	8.17635	13.776	13.9287	12.2115	13.5689	25.8369	2.86825	8.58256	10.4832	0	16.3037
NM_001229.5	10.8672	9.37289	12.096	11.9817	12.0371	9.92848	0	8.60474	5.7217	27.9552	23.5006	13.0429
NM_001235.5	533.095	581.319	597.743	596.986	699.547	641.049	749.272	688.379	781.013	971.443	925.925	919.527
NM_001237.5	229.418	269.421	256.704	195.451	229.228	219.089	139.52	152.017	168.79	143.27	155.104	156.515
NM_001238.4	20.5269	25.1273	23.52	35.6454	33.4945	31.4402	5.16739	17.2095	11.4434	13.9776	23.5006	13.0429
NM_001239.4	53.7321	44.0725	43.3439	44.1824	41.8681	43.0234	20.6696	28.6825	28.6085	41.9328	47.0012	48.911
NM_001240.4	54.3359	63.616	58.4639	58.2608	50.9396	56.5924	51.6739	68.8379	68.6604	31.4496	47.0012	61.954
NM_001242318.3	31.9978	30.7112	28.224	17.2236	16.9217	20.8498	20.6696	22.946	28.6085	34.944	51.7014	26.0859
NM_001242481.2	21.7343	20.1417	20.832	15.4264	14.8283	14.8927	10.3348	31.5507	22.8868	13.9776	9.40025	16.3037
NM_001242532.5	19.3194	31.5089	29.904	36.6938	37.8558	25.8141	36.1717	17.2095	22.8868	27.9552	23.5006	13.0429
NM_001242809.2	10.8672	11.9654	10.416	10.1844	12.2115	11.9142	77.5108	40.1555	37.1911	20.9664	23.5006	29.3466
NM_001242818.2	17.5082	12.9625	12.432	10.7835	8.89698	9.92848	31.0043	20.0777	14.3043	13.9776	28.2007	13.0429
NM_001242835.2	40.45	46.4656	38.64	30.703	33.1456	29.4545	93.013	106.125	94.4081	34.944	65.8017	88.0399
NM_001242850.2	30.7903	40.6823	44.0159	44.7815	37.158	37.3973	10.3348	25.8142	28.6085	38.4384	28.2007	35.8681
NM_001242868.2	49.506	61.0235	54.0959	47.6271	49.3695	54.9376	51.6739	54.4967	68.6604	20.9664	51.7014	45.6503
NM_001242896.3	19.9232	17.9481	13.776	15.8757	18.3173	14.5618	15.5022	25.8142	28.6085	55.9104	28.2007	32.6074
NM_001242898.2	15.0933	16.7516	11.088	19.62	20.0618	21.5117	51.6739	63.1014	42.9128	45.4272	32.9009	29.3466
NM_001243177.4	575.356	511.72	575.903	451.709	505.732	481.862	806.113	800.241	812.482	957.466	925.925	609.758
NM_001243332.2	41.0538	41.0812	46.7039	48.6755	54.0797	54.2757	67.1761	48.7602	40.0519	52.416	56.4015	48.911
NM_001243351.2	67.0142	72.5901	62.4959	82.6735	81.294	92.6659	36.1717	43.0237	37.1911	45.4272	28.2007	65.2147
NM_001243439.2	74.8628	66.2085	81.6479	54.8161	56.522	52.9519	103.348	48.7602	65.7996	55.9104	32.9009	91.3006
NM_001243925.2	13.8858	9.17347	9.74399	9.13602	9.24588	11.2523	25.8369	8.60474	2.86085	13.9776	18.8005	19.5644
NM_001244008.2	152.14	162.929	153.216	114.874	137.118	135.689	351.382	266.747	291.807	223.642	206.805	224.991
NM_001244710.2	115.917	111.677	118.608	90.9109	95.7734	90.6802	103.348	123.335	94.4081	52.416	103.403	68.4754
NM_001244926.2	63.9956	66.4079	66.1919	85.3693	87.0508	79.4279	46.5065	31.5507	37.1911	94.3488	65.8017	29.3466
NM_001244949.2	35.0164	36.8933	36.624	55.8645	52.8585	49.9734	46.5065	31.5507	31.4694	41.9328	61.1016	45.6503
NM_001247.5	24.1493	28.7169	29.904	27.4081	26.342	26.8069	31.0043	51.6284	28.6085	48.9216	61.1016	65.2147
NM_001247997.2	62.7881	59.2287	62.4959	63.9521	61.2321	63.5423	72.3435	83.1792	91.5473	97.8432	84.6022	81.5184
NM_001251845.2	19.3194	13.1619	16.8	15.4264	15.5261	20.1879	25.8369	20.0777	5.7217	10.4832	47.0012	22.8251
NM_001252078.2	111.69	109.284	107.52	103.042	99.6113	88.6945	124.017	74.5744	108.712	111.821	112.803	130.429
NM_001253.4	231.229	222.556	214.032	200.992	210.911	202.872	273.872	229.46	266.059	146.765	192.705	169.558
NM_001253697.2	481.778	368.933	373.968	373.678	378.383	336.245	232.533	289.693	246.033	244.608	357.209	238.034
NM_001253852.3	18.112	21.9366	23.184	26.5094	23.2019	17.2094	25.8369	25.8142	11.4434	34.944	18.8005	39.1288
NM_001253875.2	50.7135	71.5929	72.2399	78.3301	76.2349	90.0183	10.3348	25.8142	28.6085	38.4384	42.3011	39.1288
NM_001254.4	137.651	143.585	141.456	118.618	111.823	118.149	124.017	120.466	143.043	94.3488	98.7026	84.7791
NM_001255.3	205.269	214.579	201.6	157.11	182.126	190.958	263.537	283.956	220.286	174.72	258.507	241.294
NM_001256.6	179.912	174.495	181.44	135.393	137.118	122.451	165.356	197.909	168.79	97.8432	122.203	166.298
NM_001256007.3	48.2986	50.0552	41.6639	54.0673	51.8118	40.0449	36.1717	28.6825	31.4694	31.4496	28.2007	29.3466
NM_001256012.3	1692.86	1683.53	1694.78	1990.9	2202.79	1907.92	1627.73	1594.75	1504.81	1991.81	1969.35	1803.19
NM_001256071.3	105.049	100.908	92.7359	120.715	130.489	111.53	248.035	252.406	191.677	227.136	206.805	299.988
NM_001256141.2	10.2634	11.5665	8.73599	14.5278	18.8407	12.5761	20.6696	5.73649	5.7217	6.9888	18.8005	6.52147
NM_001256155.3	38.6388	36.8933	38.64	29.5048	37.8558	30.1164	62.0087	57.3649	54.3562	59.4048	94.0025	78.2577
NM_001256378.2	216.74	228.34	227.472	239.034	241.963	247.881	165.356	117.598	168.79	178.214	188.005	241.294
NM_001256409.2	64.5993	73.1883	61.8239	59.459	57.0453	53.2829	46.5065	37.2872	45.7736	38.4384	47.0012	52.1718
NM_001256447.2	109.275	116.264	128.352	102.893	93.3311	105.904	108.515	154.885	137.321	97.8432	98.7026	97.8221
NM_001256470.2	91.1635	106.093	99.4559	91.51	98.739	88.0326	149.854	134.808	128.738	108.326	103.403	123.908
NM_001256545.2	135.84	150.166	153.888	124.01	131.71	119.142	175.691	200.777	148.764	118.81	126.903	192.383
NM_001256660.2	25.3567	26.1244	31.584	29.9542	27.9121	31.1092	93.013	63.1014	82.9647	80.3712	122.203	71.7362
NM_001256686.2	152.14	154.952	154.224	130.45	136.42	168.453	72.3435	131.939	114.434	52.416	42.3011	97.8221
NM_001256706.2	16.9045	23.1331	19.152	25.7606	23.2019	27.4688	10.3348	37.2872	22.8868	24.4608	37.601	22.8251
NM_001256798.2	15.697	15.7544	13.104	10.484	9.24588	7.61184	20.6696	37.2872	20.026	20.9664	18.8005	16.3037
NM_001256864.2	16.3008	9.77174	15.792	17.673	13.4327	12.907	10.3348	8.60474	2.86085	13.9776	14.1004	13.0429
NM_001256875.2	54.3359	52.8472	57.7919	41.187	42.9148	46.3329	25.8369	106.125	57.217	41.9328	18.8005	29.3466
NM_001257180.2	13.2821	15.3556	12.768	20.3688	20.7596	16.8784	10.3348	11.473	17.1651	10.4832	9.40025	13.0429
NM_001258038.2	68.2217	66.0091	61.1519	31.9012	39.9492	43.3544	56.8413	83.1792	80.1039	48.9216	65.8017	68.4754
NM_001258217.2	38.6388	33.5031	32.592	35.4957	32.6223	29.1236	36.1717	14.3412	20.026	38.4384	51.7014	19.5644
NM_001258249.2	34.4127	34.3008	26.208	29.3551	32.0989	28.4617	20.6696	65.9697	31.4694	87.36	98.7026	39.1288
NM_001258308.2	59.7695	46.2662	44.3519	32.7998	34.7157	31.1092	134.352	83.1792	100.13	55.9104	61.1016	48.911
NM_001258315.2	370.691	359.959	317.184	280.67	317.326	281.969	196.361	272.483	228.868	209.664	282.007	185.862
NM_001258374.3	44.6762	52.8472	59.1359	43.4335	43.9615	57.2543	82.6782	48.7602	74.3821	55.9104	42.3011	78.2577
NM_001258392.3	41.0538	35.0985	41.9999	29.6546	34.7157	39.052	67.1761	40.1555	31.4694	38.4384	32.9009	35.8681
NM_001258419.2	7.24478	11.5665	9.07199	10.1844	6.45467	7.94279	25.8369	14.3412	8.58256	20.9664	9.40025	19.5644
NM_001258429.2	15.0933	12.3642	16.128	14.9771	15.875	17.5403	31.0043	11.473	25.7477	20.9664	42.3011	19.5644
NM_001260.3	30.7903	25.3267	31.584	30.8528	27.7376	33.4259	25.8369	31.5507	22.8868	17.472	4.70012	32.6074
NM_001261.4	45.2799	44.6708	40.3199	33.2491	28.9588	33.7568	51.6739	40.1555	48.6345	13.9776	18.8005	55.4325
NM_001261413.2	209.495	226.744	235.872	206.234	201.142	196.253	134.352	174.963	205.981	136.282	112.803	166.298
NM_001261434.2	27.7717	28.1187	23.856	28.0071	27.7376	31.4402	10.3348	22.946	22.8868	41.9328	47.0012	29.3466
NM_001261826.3	123.765	116.463	120.624	118.319	125.953	121.789	201.528	240.933	223.146	174.72	235.006	218.469
NM_001261833.2	19.3194	28.5175	29.568	38.1916	42.0426	36.0735	15.5022	17.2095	25.7477	24.4608	23.5006	32.6074
NM_001261843.2	19.3194	15.555	18.48	23.8136	21.283	23.1665	10.3348	5.73649	14.3043	34.944	14.1004	19.5644
NM_001265577.2	27.7717	31.11	23.184	14.6775	16.2239	18.8641	56.8413	60.2332	65.7996	48.9216	37.601	29.3466
NM_001265589.2	429.857	418.39	422.015	423.851	396.701	466.97	335.88	364.267	326.137	314.496	286.708	342.377
NM_001267046.2	44.6762	39.6852	48.0479	18.272	19.5385	24.8212	25.8369	25.8142	34.3302	24.4608	23.5006	19.5644
NM_001267594.2	25.3567	32.1071	32.928	39.2399	32.9712	40.0449	31.0043	20.0777	14.3043	52.416	42.3011	16.3037
NM_001268.4	41.0538	32.1071	33.936	37.1432	32.6223	37.3973	56.8413	34.419	48.6345	59.4048	28.2007	39.1288
NM_001270.4	373.71	360.557	330.624	319.761	325.699	287.264	232.533	249.538	260.338	244.608	225.606	267.38
NM_001270366.2	30.7903	37.2921	33.936	16.325	18.3173	22.5046	129.185	88.9157	123.017	76.8768	32.9009	39.1288
NM_001270377.2	20.5269	19.3441	14.112	17.673	17.4451	16.5475	10.3348	8.60474	34.3302	17.472	14.1004	16.3037
NM_001270454.2	33.2053	39.087	33.6	29.5048	31.9245	34.0878	36.1717	43.0237	28.6085	17.472	47.0012	39.1288
NM_001270520.2	156.97	181.276	153.552	175.681	168.868	138.668	191.193	154.885	143.043	237.619	249.107	202.166
NM_001270531.2	154.555	136.405	141.792	111.13	96.8201	105.573	51.6739	51.6284	68.6604	55.9104	56.4015	68.4754
NM_001270616.2	36.2239	36.8933	28.56	7.03923	9.59478	8.93564	36.1717	25.8142	2.86085	17.472	4.70012	3.26074
NM_001270764.2	20.5269	20.9394	23.856	8.68671	9.42033	11.9142	10.3348	28.6825	40.0519	6.9888	18.8005	16.3037
NM_001270875.3	33.2053	42.4771	44.0159	31.7514	31.0522	34.4187	0	28.6825	8.58256	13.9776	9.40025	9.78221
NM_001270941.2	54.9396	51.2518	47.0399	56.6134	50.7651	54.2757	51.6739	34.419	22.8868	45.4272	23.5006	48.911
NM_001270960.2	37.4314	31.7083	36.288	30.1039	29.4821	32.433	72.3435	40.1555	54.3562	59.4048	56.4015	55.4325
NM_001270974.2	14.4896	18.1475	12.096	26.5094	18.8407	25.8141	25.8369	22.946	25.7477	31.4496	4.70012	22.8251
NM_001270975.2	120.746	131.22	151.536	122.363	114.091	110.537	160.189	111.862	91.5473	66.3936	89.3024	65.2147
NM_001271.4	62.7881	66.0091	58.7999	40.4381	42.3915	44.3472	149.854	88.9157	77.243	66.3936	98.7026	78.2577
NM_001271186.2	26.5642	27.1216	22.512	24.862	20.7596	23.8284	15.5022	17.2095	20.026	24.4608	23.5006	22.8251
NM_001271641.2	119.539	112.874	121.296	108.584	110.253	120.797	170.524	126.203	171.651	143.27	164.504	166.298
NM_001271696.3	109.275	113.073	101.472	109.932	107.636	101.932	82.6782	120.466	100.13	101.338	108.103	68.4754
NM_001271803.2	30.7903	24.7285	27.552	24.1131	26.6909	30.7783	25.8369	28.6825	62.9387	17.472	23.5006	48.911
NM_001271838.2	29.5829	25.7256	32.592	29.8044	25.9931	28.7926	41.3391	17.2095	14.3043	13.9776	9.40025	19.5644
NM_001271852.3	22.9418	25.5262	25.2	22.9149	25.1209	33.0949	10.3348	11.473	8.58256	20.9664	9.40025	3.26074
NM_001271874.2	33.2053	33.3037	36.624	35.945	34.8901	34.7497	62.0087	40.1555	45.7736	55.9104	61.1016	42.3896
NM_001271875.2	24.1493	21.9366	29.568	24.2629	25.9931	24.1593	67.1761	65.9697	48.6345	59.4048	61.1016	29.3466
NM_001271938.2	61.5807	75.9802	62.8319	67.0973	72.5714	77.1112	361.717	301.166	286.085	272.563	258.507	238.034
NM_001271958.2	66.4105	65.6102	63.1679	48.2262	55.1264	44.6782	134.352	126.203	151.625	125.798	155.104	91.3006
NM_001271977.2	54.9396	55.2402	44.0159	37.892	44.136	52.29	160.189	91.7839	71.5213	83.8656	94.0025	120.647
NM_001272004.3	22.3381	27.5204	30.24	34.8966	41.6937	46.002	20.6696	60.2332	28.6085	55.9104	51.7014	39.1288
NM_001272013.2	26.5642	25.7256	22.848	33.6984	35.9368	34.7497	51.6739	43.0237	71.5213	80.3712	108.103	78.2577
NM_001272063.2	191.987	163.128	182.448	163.55	189.802	179.375	242.867	261.01	251.755	199.181	202.105	224.991
NM_001272071.2	172.064	203.013	178.416	197.847	180.905	222.398	46.5065	65.9697	94.4081	48.9216	51.7014	91.3006
NM_001273.5	760.702	733.678	799.679	659.291	838.758	703.268	599.417	651.092	606.501	615.015	606.316	736.926
NM_001276252.2	12.6784	16.7516	19.152	19.1707	18.4918	17.8713	82.6782	45.892	48.6345	69.888	42.3011	45.6503
NM_001276270.2	39.8463	33.3037	36.288	33.2491	31.2267	39.052	25.8369	31.5507	40.0519	10.4832	18.8005	32.6074
NM_001276277.3	124.972	106.293	109.2	107.086	104.67	111.53	108.515	91.7839	74.3821	122.304	164.504	130.429
NM_001276380.2	102.031	89.7405	99.1199	95.1044	83.9107	86.7088	103.348	120.466	105.852	87.36	56.4015	78.2577
NM_001277.3	90.5598	68.2027	70.2239	58.5604	62.4533	56.2614	36.1717	86.0474	57.217	38.4384	75.202	58.6932
NM_001277062.2	57.3545	57.8327	61.1519	54.0673	56.8709	60.2328	15.5022	25.8142	20.026	6.9888	4.70012	13.0429
NM_001277074.2	14.4896	12.9625	15.792	8.08762	6.62912	9.26659	10.3348	8.60474	11.4434	13.9776	0	13.0429
NM_001277403.2	28.9791	22.136	16.128	24.2629	22.3297	30.4474	25.8369	22.946	11.4434	31.4496	18.8005	16.3037
NM_001277406.2	649.616	352.58	491.231	364.692	466.306	579.162	31.0043	37.2872	37.1911	41.9328	32.9009	35.8681
NM_001278.5	28.3754	28.3181	30.576	36.0948	34.8901	39.383	56.8413	37.2872	11.4434	34.944	14.1004	22.8251
NM_001278116.2	402.689	404.63	398.159	447.665	484.973	471.934	387.554	372.872	340.441	370.406	357.209	560.847
NM_001278356.2	35.6202	23.9308	32.928	25.7606	27.0398	18.2022	51.6739	28.6825	20.026	27.9552	14.1004	19.5644
NM_001278509.3	12.6784	13.7602	15.12	27.1085	25.9931	25.1522	10.3348	11.473	8.58256	20.9664	14.1004	6.52147
NM_001278512.2	9.05598	11.9654	17.472	8.83648	9.76923	11.5832	41.3391	17.2095	14.3043	17.472	14.1004	29.3466
NM_001278556.2	408.123	431.751	396.479	503.23	476.076	479.546	284.206	358.531	380.493	258.586	361.91	283.684
NM_001278559.2	15.0933	12.7631	9.40799	7.03923	7.32692	10.9213	46.5065	63.1014	74.3821	45.4272	51.7014	35.8681
NM_001278624.2	14.4896	13.9596	17.472	29.5048	23.2019	29.1236	20.6696	11.473	14.3043	31.4496	28.2007	26.0859
NM_001278628.2	86.3337	84.356	82.9919	103.641	99.9602	93.6587	51.6739	48.7602	60.0779	76.8768	56.4015	71.7362
NM_001278639.2	371.295	332.239	343.392	362.445	327.618	326.647	134.352	152.017	185.955	101.338	122.203	172.819
NM_001278689.2	18.7157	14.9567	14.784	17.3734	17.2706	24.4903	0	11.473	17.1651	20.9664	9.40025	26.0859
NM_001278716.2	11.4709	15.7544	14.448	13.6291	11.6882	10.5904	0	20.0777	8.58256	6.9888	9.40025	19.5644
NM_001281.3	105.653	115.466	121.296	99.7473	94.5522	127.416	98.1804	83.1792	91.5473	73.3824	61.1016	81.5184
NM_001281293.2	85.1262	80.567	88.3679	74.7356	74.8393	70.8232	25.8369	54.4967	71.5213	52.416	122.203	74.9969
NM_001281453.2	48.9023	32.7054	37.296	22.3158	23.0275	23.4974	108.515	40.1555	68.6604	48.9216	56.4015	58.6932
NM_001281740.3	31.3941	34.6996	33.264	24.1131	24.9464	20.8498	62.0087	40.1555	65.7996	45.4272	32.9009	39.1288
NM_001281775.3	79.6926	100.509	94.0799	100.047	105.891	94.6515	62.0087	126.203	123.017	118.81	117.503	149.994
NM_001282112.2	21.7343	12.1648	8.73599	11.5324	12.2115	14.2308	41.3391	37.2872	42.9128	17.472	32.9009	16.3037
NM_001282116.2	103.842	113.472	96.7679	62.754	62.9767	62.8804	217.03	169.227	177.373	136.282	112.803	88.0399
NM_001282129.2	18.7157	18.7458	16.464	19.0209	15.875	20.5189	31.0043	22.946	37.1911	17.472	28.2007	48.911
NM_001282195.2	18.112	16.1533	14.112	15.7259	17.2706	11.5832	5.16739	17.2095	8.58256	3.4944	9.40025	13.0429
NM_001282359.2	27.1679	36.8933	31.92	46.1294	44.136	51.6281	25.8369	22.946	31.4694	69.888	61.1016	71.7362
NM_001282531.3	269.868	281.386	273.84	280.071	261.85	290.243	232.533	255.274	208.842	255.091	300.808	365.202
NM_001282547.2	28.9791	24.5291	22.176	19.62	17.2706	19.857	51.6739	77.4427	68.6604	59.4048	56.4015	45.6503
NM_001282597.3	21.1306	21.1389	16.464	20.5186	19.5385	18.2022	5.16739	11.473	17.1651	17.472	28.2007	13.0429
NM_001282659.2	274.698	250.476	285.936	248.62	235.683	213.131	160.189	172.095	160.208	164.237	126.903	192.383
NM_001282680.3	151.537	132.218	127.344	91.9593	95.9478	82.7374	118.85	129.071	137.321	66.3936	112.803	61.954
NM_001282684.2	16.9045	17.9481	18.816	13.9287	16.9217	21.1808	41.3391	17.2095	34.3302	24.4608	23.5006	39.1288
NM_001282805.2	200.439	205.206	207.984	200.543	221.727	218.758	206.696	229.46	248.894	209.664	235.006	185.862
NM_001282857.2	71.8441	77.5756	68.8799	59.7585	60.7088	48.9805	98.1804	71.7062	68.6604	55.9104	47.0012	68.4754
NM_001282860.2	79.6926	87.1479	81.6479	71.7402	74.6648	64.8661	139.52	123.335	137.321	108.326	159.804	198.905
NM_001282874.2	443.139	405.029	435.119	457.849	503.639	450.753	320.378	390.082	423.406	356.429	361.91	329.334
NM_001283.5	63.9956	56.6362	62.4959	50.323	55.1264	61.2257	46.5065	40.1555	42.9128	31.4496	32.9009	35.8681
NM_001283009.2	7.24478	9.17347	13.44	11.9817	11.3393	10.5904	46.5065	37.2872	51.4953	45.4272	42.3011	19.5644
NM_001283041.3	24.1493	27.7198	26.88	26.5094	25.9931	26.476	36.1717	17.2095	22.8868	31.4496	28.2007	32.6074
NM_001284.4	57.9583	52.6477	56.7839	70.2425	72.7459	82.4064	31.0043	25.8142	20.026	34.944	18.8005	26.0859
NM_001284236.3	152.14	145.778	145.488	107.535	111.299	104.58	165.356	174.963	203.12	188.698	136.304	159.776
NM_001284240.2	33.809	33.9019	33.6	30.4035	26.5165	26.145	46.5065	34.419	40.0519	34.944	28.2007	52.1718
NM_001284254.2	13.8858	13.9596	9.74399	7.63831	12.386	11.2523	25.8369	40.1555	34.3302	27.9552	0	42.3896
NM_001284259.2	145.499	158.741	134.064	135.543	149.33	117.156	191.193	180.7	223.146	153.754	131.603	153.255
NM_001284401.2	25.9605	26.1244	25.2	35.7952	36.1113	35.4116	15.5022	25.8142	28.6085	24.4608	28.2007	22.8251
NM_001286.5	69.4292	46.665	46.7039	20.9679	25.4698	21.8427	108.515	91.7839	60.0779	24.4608	42.3011	39.1288
NM_001286045.2	47.0911	47.4627	43.3439	30.1039	26.5165	26.8069	36.1717	28.6825	34.3302	0	14.1004	13.0429
NM_001286069.2	35.6202	35.4973	34.608	32.65	34.7157	26.8069	36.1717	31.5507	51.4953	31.4496	14.1004	32.6074
NM_001286077.2	39.2426	37.691	44.6879	29.3551	31.0522	32.433	46.5065	54.4967	45.7736	31.4496	28.2007	32.6074
NM_001286086.2	13.2821	7.97693	13.44	7.48854	9.94368	9.59753	0	2.86825	14.3043	0	0	3.26074
NM_001286134.2	85.1262	67.6045	68.2079	50.6225	53.5563	52.621	124.017	94.6522	108.712	97.8432	117.503	101.083
NM_001286176.2	82.7113	56.6362	50.3999	54.0673	53.033	55.5995	62.0087	65.9697	71.5213	59.4048	79.9021	71.7362
NM_001286398.3	9.65971	14.9567	13.104	10.9333	8.19918	10.9213	46.5065	37.2872	14.3043	6.9888	18.8005	22.8251
NM_001286445.3	96.5971	128.827	124.656	103.641	96.9945	89.3564	108.515	149.149	114.434	122.304	122.203	84.7791
NM_001286577.2	40.45	44.6708	51.0719	49.8737	54.9519	50.6353	67.1761	100.389	120.156	83.8656	112.803	101.083
NM_001286581.2	60.3732	41.6795	39.9839	27.2583	30.5288	30.4474	113.683	94.6522	97.269	80.3712	42.3011	94.5613
NM_001286611.2	65.203	73.5872	63.8399	85.2196	92.1099	77.1112	36.1717	43.0237	71.5213	62.8992	37.601	48.911
NM_001286635.2	26.5642	27.9193	27.888	32.3505	33.4945	35.4116	46.5065	28.6825	20.026	38.4384	51.7014	71.7362
NM_001286657.2	37.4314	35.2979	30.24	54.8161	45.8805	43.0234	10.3348	8.60474	22.8868	31.4496	9.40025	16.3037
NM_001287.6	31.3941	28.1187	25.536	30.2537	28.4354	29.7855	25.8369	43.0237	42.9128	38.4384	51.7014	32.6074
NM_001287135.2	46.4874	40.6823	44.6879	39.2399	43.2637	44.0163	41.3391	40.1555	34.3302	27.9552	42.3011	42.3896
NM_001287491.2	44.6762	42.6766	31.92	26.809	23.2019	27.4688	227.365	157.754	200.26	83.8656	89.3024	97.8221
NM_001287492.4	21.7343	25.1273	27.216	52.5695	49.8929	50.6353	31.0043	43.0237	48.6345	73.3824	37.601	68.4754
NM_001288565.2	46.4874	42.0783	59.1359	48.975	46.2294	50.3043	41.3391	45.892	17.1651	31.4496	37.601	45.6503
NM_001288655.2	50.1097	49.0581	49.3919	48.5257	48.3228	60.2328	36.1717	54.4967	45.7736	55.9104	32.9009	61.954
NM_001288732.2	22.3381	14.9567	19.824	19.3204	13.7816	14.2308	31.0043	11.473	37.1911	27.9552	9.40025	26.0859
NM_001288962.2	13.2821	15.555	14.448	17.673	15.5261	16.2165	25.8369	14.3412	8.58256	20.9664	0	6.52147
NM_001288973.2	51.9209	48.4598	43.3439	35.1961	37.158	44.3472	98.1804	31.5507	45.7736	24.4608	61.1016	55.4325
NM_001288980.2	22.9418	18.9452	19.488	25.7606	21.1085	26.8069	0	5.73649	14.3043	31.4496	23.5006	32.6074
NM_001288985.2	35.6202	40.6823	50.0639	63.5028	54.4286	53.2829	46.5065	40.1555	31.4694	59.4048	65.8017	45.6503
NM_001289104.2	214.325	188.455	203.952	164.598	183.522	170.77	186.026	223.723	194.538	185.203	216.206	192.383
NM_001289125.3	16.9045	16.5521	19.488	18.8711	16.5728	19.1951	10.3348	11.473	8.58256	34.944	14.1004	32.6074
NM_001289187.2	12.6784	15.1562	14.784	34.7468	34.5412	28.1307	5.16739	14.3412	17.1651	17.472	42.3011	16.3037
NM_001289971.2	16.3008	22.136	23.52	38.7906	33.4945	31.4402	41.3391	34.419	20.026	62.8992	65.8017	81.5184
NM_001290.5	39.2426	33.7025	31.248	25.1615	24.5975	32.433	15.5022	22.946	25.7477	13.9776	9.40025	35.8681
NM_001290047.2	22.3381	25.5262	22.848	24.5624	24.5975	30.1164	72.3435	63.1014	51.4953	55.9104	32.9009	61.954
NM_001290117.2	50.1097	47.6622	47.0399	47.3276	36.6346	39.052	20.6696	14.3412	11.4434	10.4832	23.5006	9.78221
NM_001290223.2	166.63	173.299	179.088	206.983	209.166	207.505	170.524	180.7	140.182	199.181	183.305	218.469
NM_001290264.2	19.3194	17.9481	18.48	16.0255	13.6071	17.8713	72.3435	54.4967	60.0779	41.9328	61.1016	74.9969
NM_001290321.3	111.087	103.301	93.4079	91.51	103.449	86.3778	139.52	131.939	94.4081	199.181	145.704	136.951
NM_001291303.3	139.462	143.984	150.192	177.329	191.372	146.611	124.017	103.257	125.877	227.136	202.105	218.469
NM_001291415.2	51.3172	49.6564	47.0399	39.0902	38.728	43.6853	41.3391	57.3649	45.7736	66.3936	51.7014	55.4325
NM_001291694.2	19.3194	21.3383	24.864	14.378	10.8159	14.2308	31.0043	45.892	25.7477	24.4608	32.9009	39.1288
NM_001291867.2	34.4127	29.1158	37.296	29.3551	29.1332	31.4402	36.1717	48.7602	48.6345	48.9216	51.7014	39.1288
NM_001291941.3	18.112	18.9452	12.768	29.2053	30.1799	23.4974	25.8369	11.473	20.026	38.4384	37.601	26.0859
NM_001291978.2	74.259	61.2229	68.8799	57.9613	61.2321	61.8876	36.1717	37.2872	45.7736	38.4384	51.7014	39.1288
NM_001291999.2	51.3172	45.4685	47.3759	44.3322	38.9025	30.1164	20.6696	17.2095	14.3043	24.4608	9.40025	32.6074
NM_001292034.3	77.2777	77.1768	67.1999	39.839	39.6003	57.5852	51.6739	63.1014	48.6345	34.944	42.3011	52.1718
NM_001293.3	158.781	153.755	168.336	152.467	125.43	161.834	108.515	114.73	105.852	66.3936	56.4015	101.083
NM_001293298.2	19.3194	19.9423	23.184	22.3158	18.3173	16.8784	31.0043	14.3412	17.1651	24.4608	28.2007	16.3037
NM_001294.4	145.499	161.134	130.704	120.416	127.349	148.927	180.859	177.831	177.373	153.754	98.7026	146.733
NM_001294338.2	19.3194	19.9423	17.472	21.1177	21.4574	22.5046	20.6696	22.946	17.1651	10.4832	9.40025	26.0859
NM_001297551.2	24.1493	33.5031	30.912	44.3322	46.2294	50.3043	0	25.8142	20.026	27.9552	14.1004	26.0859
NM_001297568.2	18.112	18.3469	21.168	17.0739	13.0838	14.8927	10.3348	14.3412	25.7477	20.9664	9.40025	16.3037
NM_001297595.2	25.3567	37.2921	38.64	33.0993	35.7624	38.3901	62.0087	54.4967	57.217	59.4048	47.0012	74.9969
NM_001297599.2	61.5807	63.4166	60.1439	40.4381	35.4135	36.7354	67.1761	57.3649	62.9387	45.4272	56.4015	39.1288
NM_001297654.2	287.98	306.513	284.256	264.495	272.666	288.257	635.589	674.038	572.17	601.037	423.011	531.5
NM_001297671.3	30.1866	41.2806	36.96	20.9679	20.2363	16.8784	46.5065	63.1014	37.1911	38.4384	18.8005	39.1288
NM_001297719.2	18.7157	10.5694	13.44	8.98625	6.97802	5.95709	51.6739	22.946	14.3043	24.4608	14.1004	6.52147
NM_001297732.2	16.9045	16.5521	16.128	19.62	14.1305	15.2237	20.6696	14.3412	14.3043	10.4832	14.1004	22.8251
NM_001297776.2	27.1679	32.3066	38.9759	73.2379	68.908	63.5423	56.8413	37.2872	20.026	76.8768	56.4015	91.3006
NM_001300.6	50.7135	40.8818	39.6479	21.2675	22.5041	30.4474	77.5108	54.4967	60.0779	34.944	42.3011	39.1288
NM_001300759.2	21.7343	11.5665	10.752	14.0785	11.5137	13.238	10.3348	8.60474	17.1651	13.9776	37.601	22.8251
NM_001300791.2	54.9396	44.6708	47.0399	42.5349	41.6937	39.052	41.3391	28.6825	22.8868	13.9776	23.5006	29.3466
NM_001300816.3	28.9791	15.9539	16.128	15.2766	15.5261	16.8784	5.16739	22.946	8.58256	13.9776	9.40025	3.26074
NM_001300826.2	22.9418	15.3556	17.136	21.4172	21.9808	20.8498	31.0043	20.0777	20.026	31.4496	37.601	19.5644
NM_001300829.2	87.5411	71.9918	89.0399	102.893	92.1099	107.89	72.3435	65.9697	42.9128	66.3936	51.7014	78.2577
NM_001300860.2	213.117	213.183	224.784	202.79	220.854	199.232	103.348	154.885	140.182	111.821	103.403	130.429
NM_001300862.2	10.8672	10.9683	9.07199	9.13602	9.07143	12.5761	20.6696	14.3412	28.6085	20.9664	23.5006	39.1288
NM_001300905.2	106.861	100.11	99.7919	66.1987	74.3159	71.1541	206.696	203.646	203.12	153.754	145.704	146.733
NM_001301043.2	202.25	191.646	189.168	196.35	202.363	205.52	113.683	120.466	123.017	97.8432	103.403	130.429
NM_001301073.2	59.1657	63.8154	65.5199	61.1065	54.7775	49.9734	36.1717	40.1555	51.4953	48.9216	70.5019	61.954
NM_001301833.4	45.8836	42.4771	44.0159	46.5787	44.6593	48.9805	25.8369	25.8142	25.7477	34.944	56.4015	68.4754
NM_001302084.2	9.65971	10.37	13.776	15.1268	14.3049	14.2308	10.3348	25.8142	11.4434	24.4608	4.70012	29.3466
NM_001302769.2	25.3567	19.9423	26.208	20.8181	20.5852	15.5546	25.8369	45.892	40.0519	41.9328	47.0012	39.1288
NM_001303.4	13.2821	13.3614	11.424	15.7259	11.6882	18.2022	5.16739	8.60474	8.58256	3.4944	0	13.0429
NM_001303007.2	61.5807	66.4079	60.8159	48.376	56.3475	66.1899	108.515	91.7839	77.243	76.8768	47.0012	65.2147
NM_001303037.2	49.506	44.6708	37.632	45.3805	43.2637	40.7068	20.6696	14.3412	37.1911	24.4608	32.9009	45.6503
NM_001303143.2	35.6202	41.2806	40.6559	50.1732	45.5316	41.0377	5.16739	14.3412	48.6345	55.9104	9.40025	29.3466
NM_001303256.3	61.5807	59.827	71.2319	45.8299	38.9025	49.9734	103.348	68.8379	62.9387	73.3824	37.601	91.3006
NM_001303264.2	71.8441	69.1999	67.5359	35.4957	44.136	43.6853	149.854	91.7839	97.269	59.4048	61.1016	74.9969
NM_001303426.2	23.5455	26.7227	29.568	34.5971	30.8778	28.1307	25.8369	8.60474	20.026	20.9664	18.8005	29.3466
NM_001303457.2	89.956	89.1422	107.52	114.575	108.857	117.156	82.6782	123.335	85.8256	146.765	141.004	133.69
NM_001303512.2	22.3381	30.5118	33.936	30.8528	35.0646	29.1236	103.348	48.7602	74.3821	52.416	70.5019	58.6932
NM_001304.5	487.212	566.761	545.999	812.057	797.239	736.363	273.872	238.065	254.616	370.406	390.11	296.727
NM_001304274.2	21.7343	17.1504	15.456	25.6108	30.3544	22.8355	25.8369	22.946	14.3043	52.416	37.601	26.0859
NM_001304504.2	42.865	44.8702	40.3199	44.3322	49.7184	61.8876	25.8369	43.0237	45.7736	27.9552	14.1004	35.8681
NM_001304533.3	25.3567	28.7169	25.872	28.4564	24.4231	28.7926	25.8369	28.6825	20.026	27.9552	23.5006	22.8251
NM_001304808.3	41.6575	43.0754	41.6639	35.4957	35.4135	32.764	87.8456	88.9157	117.295	76.8768	89.3024	78.2577
NM_001305203.2	10.2634	12.3642	9.40799	35.945	34.8901	31.1092	15.5022	8.60474	11.4434	34.944	28.2007	48.911
NM_001306089.2	13.2821	12.1648	11.424	9.58533	7.85028	11.5832	46.5065	63.1014	37.1911	34.944	70.5019	58.6932
NM_001306144.3	25.9605	32.9048	32.928	35.3459	35.239	29.7855	10.3348	20.0777	25.7477	20.9664	18.8005	22.8251
NM_001306158.2	13.2821	15.3556	18.816	19.4702	19.7129	24.1593	5.16739	5.73649	5.7217	6.9888	4.70012	19.5644
NM_001306215.2	78.4851	54.0437	53.7599	41.3367	29.831	40.0449	180.859	180.7	125.877	108.326	89.3024	146.733
NM_001308027.2	22.3381	15.7544	15.792	15.2766	14.3049	13.5689	25.8369	28.6825	8.58256	6.9888	23.5006	19.5644
NM_001308068.2	10.8672	9.97116	10.08	7.03923	9.76923	8.93564	25.8369	22.946	11.4434	10.4832	18.8005	29.3466
NM_001308120.2	20.5269	21.5377	24.192	26.809	22.853	23.4974	15.5022	40.1555	51.4953	34.944	37.601	48.911
NM_001308142.2	51.3172	52.8472	53.4239	34.5971	37.6813	37.0663	36.1717	68.8379	48.6345	10.4832	56.4015	35.8681
NM_001308147.2	16.3008	18.7458	16.128	19.3204	17.2706	15.2237	46.5065	40.1555	17.1651	55.9104	47.0012	65.2147
NM_001308195.2	27.7717	24.3296	26.544	24.862	21.8063	23.4974	20.6696	45.892	40.0519	13.9776	23.5006	61.954
NM_001308319.2	100.219	107.29	106.512	76.0836	71.0014	75.1255	155.022	186.436	197.399	192.192	216.206	192.383
NM_001312.4	61.5807	46.4656	55.7759	38.7906	39.4258	26.476	118.85	57.3649	74.3821	24.4608	51.7014	42.3896
NM_001312653.2	492.041	364.944	416.639	229.898	287.495	328.964	335.88	252.406	374.772	108.326	277.307	198.905
NM_001312673.2	35.0164	43.4743	39.3119	45.5303	44.8338	40.7068	46.5065	63.1014	37.1911	52.416	47.0012	42.3896
NM_001313998.2	23.5455	31.7083	26.208	39.3897	34.0179	35.0806	10.3348	11.473	22.8868	38.4384	14.1004	16.3037
NM_001314025.2	21.7343	13.3614	15.456	14.0785	18.1429	13.238	5.16739	11.473	5.7217	17.472	9.40025	22.8251
NM_001316.4	1077.66	1181.18	1021.1	1372.2	1390.37	1381.71	899.126	1110.01	1192.98	1320.88	1504.04	1408.64
NM_001316979.2	8.45225	11.5665	10.08	9.28579	10.9904	6.94994	20.6696	17.2095	31.4694	24.4608	18.8005	55.4325
NM_001317162.2	68.8254	55.6391	52.4159	36.2445	40.647	53.2829	77.5108	134.808	120.156	94.3488	131.603	140.212
NM_001317782.2	676.783	566.761	583.967	462.792	470.842	526.541	878.456	625.278	700.909	569.587	531.114	635.843
NM_001317785.2	13.2821	15.1562	20.832	19.9195	18.1429	20.5189	20.6696	20.0777	14.3043	3.4944	9.40025	9.78221
NM_001317950.2	9.05598	9.77174	11.088	8.68671	8.89698	8.27374	46.5065	25.8142	42.9128	41.9328	42.3011	58.6932
NM_001318042.2	37.4314	32.3066	32.256	36.3943	40.647	45.3401	103.348	63.1014	82.9647	90.8544	84.6022	55.4325
NM_001318252.2	20.5269	19.1446	25.536	21.8665	26.342	27.1379	20.6696	14.3412	20.026	17.472	28.2007	29.3466
NM_001318510.2	187.761	130.622	139.44	64.1019	61.2321	53.6138	191.193	114.73	128.738	87.36	51.7014	55.4325
NM_001318734.2	25.9605	21.1389	22.512	13.0301	12.5604	12.2451	72.3435	31.5507	45.7736	27.9552	14.1004	48.911
NM_001318852.2	49.506	47.6622	35.28	42.8344	49.544	48.6496	103.348	100.389	105.852	122.304	126.903	84.7791
NM_001318891.2	15.697	15.7544	17.136	27.4081	28.261	25.4831	20.6696	8.60474	11.4434	41.9328	23.5006	19.5644
NM_001318895.3	38.0351	16.3527	20.832	27.1085	26.6909	26.476	25.8369	34.419	22.8868	55.9104	23.5006	35.8681
NM_001318939.2	10.8672	10.5694	10.08	13.3296	14.8283	14.5618	15.5022	11.473	2.86085	3.4944	4.70012	19.5644
NM_001319.7	22.9418	23.3325	17.472	10.9333	15.875	18.5332	129.185	120.466	97.269	52.416	75.202	104.344
NM_001319206.4	33.809	25.1273	20.496	17.673	16.3984	16.5475	46.5065	25.8142	20.026	38.4384	18.8005	32.6074
NM_001319236.2	684.632	553.001	604.463	498.287	495.963	497.748	573.58	387.213	617.944	328.474	455.912	277.163
NM_001319674.2	16.3008	20.5406	23.184	11.8319	11.1648	12.5761	20.6696	8.60474	5.7217	13.9776	28.2007	9.78221
NM_001319944.2	26.5642	32.1071	33.6	30.8528	28.7843	32.433	36.1717	40.1555	28.6085	34.944	47.0012	26.0859
NM_001319999.2	234.852	217.371	228.144	147.974	164.158	145.287	186.026	215.119	257.477	115.315	126.903	140.212
NM_001320.7	214.929	236.715	215.04	238.285	238.125	242.586	165.356	220.855	205.981	220.147	188.005	192.383
NM_001320047.2	40.45	42.6766	41.9999	36.6938	44.4849	40.0449	82.6782	88.9157	65.7996	94.3488	61.1016	78.2577
NM_001320214.2	153.952	162.53	183.792	364.093	388.676	318.373	139.52	180.7	183.095	272.563	291.408	280.423
NM_001320643.3	27.1679	25.5262	29.232	14.2282	16.0495	14.5618	31.0043	57.3649	42.9128	17.472	28.2007	29.3466
NM_001320646.2	232.437	187.059	211.68	148.423	176.37	181.691	155.022	166.358	148.764	104.832	164.504	104.344
NM_001320669.3	11.4709	15.555	8.73599	45.9796	40.8214	37.0663	15.5022	14.3412	11.4434	48.9216	18.8005	42.3896
NM_001320714.2	57.9583	53.4454	57.4559	65.3001	57.0453	54.2757	87.8456	97.5204	51.4953	132.787	131.603	123.908
NM_001320835.1	25.9605	21.5377	29.904	21.1177	19.0151	19.857	15.5022	28.6825	20.026	20.9664	18.8005	29.3466
NM_001320848.2	24.753	17.1504	18.48	21.8665	24.772	23.8284	15.5022	20.0777	17.1651	38.4384	51.7014	29.3466
NM_001320925.4	25.9605	21.9366	28.224	16.7743	17.6195	18.5332	25.8369	22.946	28.6085	34.944	18.8005	13.0429
NM_001320973.2	28.3754	38.4887	33.936	35.6454	26.1676	32.1021	25.8369	40.1555	31.4694	52.416	37.601	29.3466
NM_001321.3	356.806	372.323	369.6	398.091	367.218	385.556	372.052	392.95	328.998	380.89	413.611	358.681
NM_001321075.3	9.65971	9.97116	10.08	5.84106	5.40797	9.92848	31.0043	28.6825	28.6085	27.9552	18.8005	26.0859
NM_001321092.3	99.6158	121.249	106.848	99.5976	98.2157	104.249	149.854	83.1792	105.852	55.9104	84.6022	81.5184
NM_001321103.2	146.103	131.021	137.424	94.8049	77.6305	87.3707	232.533	154.885	154.486	125.798	178.605	149.994
NM_001321154.2	17.5082	19.7429	18.48	25.7606	21.8063	20.5189	10.3348	14.3412	25.7477	27.9552	18.8005	26.0859
NM_001321209.2	45.2799	41.6795	43.6799	47.4773	45.5316	52.29	10.3348	8.60474	20.026	20.9664	0	13.0429
NM_001321324.2	18.7157	16.7516	18.816	20.2191	23.3764	24.1593	67.1761	43.0237	42.9128	48.9216	47.0012	45.6503
NM_001321571.2	163.008	198.626	177.408	217.617	219.284	241.262	134.352	134.808	168.79	150.259	169.204	179.34
NM_001321759.2	13.2821	13.3614	13.776	11.083	14.1305	24.1593	5.16739	8.60474	17.1651	17.472	9.40025	6.52147
NM_001321967.2	111.087	105.295	111.216	112.328	113.916	111.53	155.022	117.598	114.434	108.326	150.404	74.9969
NM_001322101.2	17.5082	25.3267	25.536	18.272	19.1896	19.857	20.6696	28.6825	17.1651	17.472	14.1004	29.3466
NM_001322131.2	16.9045	21.9366	16.464	53.0189	39.6003	65.528	5.16739	28.6825	25.7477	83.8656	37.601	35.8681
NM_001322374.2	37.4314	40.8818	44.0159	60.6572	46.0549	56.5924	31.0043	57.3649	40.0519	52.416	65.8017	68.4754
NM_001322917.1	8.45225	10.1706	11.76	21.7168	20.0618	17.5403	0	5.73649	11.4434	13.9776	9.40025	6.52147
NM_001322934.2	13.2821	12.3642	12.432	12.2812	10.8159	10.5904	25.8369	25.8142	31.4694	20.9664	23.5006	16.3037
NM_001323043.2	24.753	26.7227	26.208	25.7606	23.0275	18.8641	20.6696	37.2872	22.8868	31.4496	23.5006	32.6074
NM_001323329.2	35.6202	37.4916	36.288	35.4957	33.3201	35.7425	36.1717	28.6825	14.3043	20.9664	9.40025	13.0429
NM_001323342.2	280.735	265.432	251.328	220.163	221.552	198.57	227.365	223.723	240.312	195.686	310.208	189.123
NM_001323682.2	10.2634	12.5637	11.088	11.2328	11.1648	15.8856	25.8369	34.419	20.026	34.944	37.601	26.0859
NM_001324.3	45.2799	67.0062	64.8479	78.0306	72.397	85.7159	31.0043	80.3109	82.9647	31.4496	89.3024	45.6503
NM_001324242.2	15.697	13.3614	13.104	9.58533	7.32692	9.59753	15.5022	14.3412	28.6085	10.4832	4.70012	6.52147
NM_001324445.2	6.64105	11.5665	10.752	11.2328	9.59478	12.2451	20.6696	22.946	11.4434	17.472	32.9009	48.911
NM_001325.3	46.4874	39.087	41.6639	40.1386	46.7528	48.3186	36.1717	77.4427	20.026	52.416	28.2007	42.3896
NM_001326.3	146.103	129.426	138.432	120.416	126.128	108.882	165.356	149.149	171.651	136.282	126.903	114.126
NM_001326342.2	95.9934	103.7	110.544	115.473	121.069	103.256	62.0087	77.4427	97.269	111.821	56.4015	136.951
NM_001329214.4	19.9232	21.5377	23.184	29.0555	26.1676	25.8141	20.6696	20.0777	28.6085	34.944	4.70012	26.0859
NM_001329630.2	23.5455	17.7487	16.464	13.0301	15.5261	10.2594	15.5022	37.2872	48.6345	3.4944	23.5006	29.3466
NM_001329686.2	11.4709	11.9654	13.104	18.8711	22.853	17.2094	5.16739	8.60474	5.7217	17.472	4.70012	9.78221
NM_001329752.2	36.8276	26.3239	35.952	28.1569	20.9341	20.8498	15.5022	25.8142	20.026	20.9664	9.40025	9.78221
NM_001329943.3	94.7859	94.5266	94.7519	86.8671	105.019	103.256	72.3435	111.862	74.3821	55.9104	122.203	101.083
NM_001329984.2	103.842	105.694	135.408	90.9109	99.9602	112.192	144.687	120.466	128.738	125.798	126.903	127.169
NM_001330059.2	41.0538	53.6448	41.6639	29.8044	38.9025	42.0306	31.0043	37.2872	31.4694	34.944	28.2007	32.6074
NM_001330063.2	103.842	102.703	104.16	103.492	101.007	118.149	160.189	166.358	134.46	111.821	94.0025	120.647
NM_001330071.2	59.7695	45.4685	57.4559	47.3276	47.4506	59.5709	41.3391	54.4967	54.3562	41.9328	65.8017	58.6932
NM_001330074.2	118.935	104.498	115.92	132.996	141.828	143.963	103.348	120.466	120.156	118.81	141.004	117.386
NM_001330078.2	15.0933	17.7487	15.456	21.4172	24.9464	25.4831	5.16739	8.60474	22.8868	10.4832	18.8005	9.78221
NM_001330103.2	25.9605	26.7227	32.256	52.5695	47.7995	41.3687	5.16739	37.2872	14.3043	34.944	37.601	32.6074
NM_001330112.2	21.1306	25.7256	17.472	33.5487	32.6223	29.1236	36.1717	20.0777	28.6085	48.9216	37.601	42.3896
NM_001330145.2	33.809	29.1158	34.608	26.0601	25.4698	22.5046	41.3391	25.8142	14.3043	20.9664	9.40025	26.0859
NM_001330177.2	31.9978	42.0783	41.3279	67.8462	71.1758	52.621	51.6739	48.7602	60.0779	83.8656	65.8017	81.5184
NM_001330195.2	18.112	13.9596	10.08	8.08762	6.80357	4.96424	10.3348	14.3412	11.4434	10.4832	9.40025	0
NM_001330218.2	9.65971	11.1677	16.128	28.4564	21.1085	27.4688	15.5022	8.60474	2.86085	6.9888	9.40025	48.911
NM_001330239.4	240.285	251.872	230.16	229.449	252.779	244.241	191.193	189.304	165.929	195.686	192.705	176.08
NM_001330288.2	159.989	165.721	172.704	142.881	147.236	163.489	134.352	189.304	120.156	125.798	155.104	130.429
NM_001330301.2	70.0329	75.1826	65.1839	62.4544	69.0824	83.7302	67.1761	54.4967	57.217	24.4608	89.3024	58.6932
NM_001330311.2	15.697	12.3642	9.40799	6.58991	6.28022	14.8927	46.5065	34.419	40.0519	20.9664	28.2007	19.5644
NM_001330360.2	151.537	156.148	151.536	143.93	162.065	155.215	180.859	172.095	154.486	136.282	225.606	195.644
NM_001330442.2	67.618	79.171	73.2479	80.1274	78.1539	81.0826	77.5108	48.7602	54.3562	55.9104	51.7014	84.7791
NM_001330564.2	160.593	151.562	151.872	129.702	145.492	145.618	87.8456	117.598	128.738	104.832	117.503	97.8221
NM_001330574.2	74.259	59.2287	58.1279	49.5741	50.0673	41.6996	20.6696	65.9697	54.3562	41.9328	56.4015	45.6503
NM_001330588.2	189.572	185.464	194.88	200.992	224.518	218.758	196.361	223.723	180.234	192.192	249.107	231.512
NM_001330640.2	71.2404	79.3704	87.3599	73.6872	78.3283	75.7874	77.5108	123.335	80.1039	146.765	155.104	123.908
NM_001330668.2	50.7135	36.4944	50.7359	50.7723	56.522	61.2257	77.5108	11.473	22.8868	52.416	61.1016	35.8681
NM_001330672.2	237.267	213.383	241.248	174.333	185.79	169.115	232.533	160.622	165.929	164.237	141.004	182.601
NM_001330691.3	75.4665	72.3906	71.2319	105.888	108.508	100.278	46.5065	51.6284	65.7996	129.293	126.903	91.3006
NM_001330700.2	729.912	729.091	720.719	856.988	867.368	773.429	356.55	335.585	369.05	510.183	531.114	410.853
NM_001330701.2	112.898	116.463	109.872	140.036	143.922	131.056	67.1761	48.7602	71.5213	111.821	150.404	110.865
NM_001330707.2	29.5829	27.321	27.552	44.3322	36.8091	35.4116	15.5022	14.3412	8.58256	34.944	28.2007	39.1288
NM_001330723.2	84.5225	74.9831	78.2879	76.5329	74.1415	86.0469	51.6739	54.4967	54.3562	48.9216	79.9021	45.6503
NM_001330736.2	48.9023	40.8818	39.9839	55.4152	53.5563	52.621	51.6739	31.5507	51.4953	111.821	75.202	104.344
NM_001330988.2	51.9209	35.6968	34.608	15.4264	12.5604	17.8713	62.0087	48.7602	65.7996	31.4496	42.3011	6.52147
NM_001331036.3	30.1866	27.5204	27.552	41.6363	38.728	37.3973	10.3348	14.3412	20.026	38.4384	4.70012	58.6932
NM_001332.4	110.483	83.3589	93.7439	60.8069	71.5247	83.3993	144.687	108.993	117.295	108.326	89.3024	110.865
NM_001333.4	41.6575	31.11	39.3119	40.8874	43.6126	33.0949	25.8369	14.3412	68.6604	69.888	32.9009	48.911
NM_001334.3	11.4709	12.7631	12.768	18.8711	19.0151	19.526	0	2.86825	2.86085	3.4944	4.70012	13.0429
NM_001336.4	13.2821	10.5694	10.08	10.9333	13.0838	10.2594	5.16739	0	8.58256	10.4832	0	13.0429
NM_001338.5	62.7881	56.4368	64.8479	51.0718	47.625	55.5995	51.6739	40.1555	45.7736	52.416	79.9021	32.6074
NM_001343.4	8.45225	16.951	14.784	19.3204	25.8187	27.4688	15.5022	28.6825	28.6085	20.9664	42.3011	26.0859
NM_001344.4	83.315	90.7376	86.6879	73.837	73.2692	104.911	72.3435	100.389	77.243	59.4048	51.7014	88.0399
NM_001346231.2	53.7321	54.0437	54.7679	56.3138	45.1827	48.3186	67.1761	71.7062	54.3562	101.338	75.202	68.4754
NM_001346249.2	95.3896	93.9283	80.9759	105.738	106.589	103.256	36.1717	94.6522	114.434	178.214	155.104	140.212
NM_001346311.2	28.9791	44.0725	31.584	42.6847	36.1113	46.002	36.1717	40.1555	31.4694	66.3936	84.6022	45.6503
NM_001346516.2	45.2799	48.8587	48.7199	41.187	34.1923	44.3472	67.1761	63.1014	65.7996	62.8992	65.8017	65.2147
NM_001346754.2	13.8858	17.1504	9.40799	30.703	30.3544	27.1379	5.16739	17.2095	22.8868	10.4832	18.8005	13.0429
NM_001347217.2	14.4896	18.3469	15.12	19.7697	20.2363	23.8284	46.5065	51.6284	31.4694	62.8992	37.601	45.6503
NM_001347702.2	14.4896	9.57231	11.424	11.083	13.0838	13.5689	15.5022	22.946	11.4434	13.9776	9.40025	19.5644
NM_001347721.2	81.5038	78.7722	75.2639	66.3485	62.4533	73.8017	87.8456	77.4427	51.4953	66.3936	61.1016	81.5184
NM_001348.3	65.8068	62.4195	58.7999	31.3021	39.0769	46.6639	77.5108	86.0474	68.6604	52.416	51.7014	35.8681
NM_001348022.3	14.4896	21.5377	18.144	44.7815	39.4258	40.0449	15.5022	14.3412	11.4434	55.9104	28.2007	29.3466
NM_001348323.3	353.183	395.257	397.487	433.437	443.802	405.744	418.559	481.866	406.241	496.205	460.612	469.546
NM_001348716.2	165.423	107.888	118.272	24.1131	24.772	25.8141	609.752	347.058	354.746	108.326	56.4015	84.7791
NM_001348719.2	12.0746	11.3671	12.768	19.0209	19.8874	22.1736	10.3348	14.3412	11.4434	3.4944	14.1004	16.3037
NM_001348768.2	12.0746	13.5608	11.76	10.0346	10.9904	12.5761	36.1717	17.2095	8.58256	6.9888	37.601	22.8251
NM_001348800.3	22.3381	22.136	19.152	5.54152	6.62912	9.92848	72.3435	65.9697	51.4953	27.9552	23.5006	16.3037
NM_001348957.2	26.5642	40.4829	32.592	44.0326	40.647	46.6639	15.5022	22.946	25.7477	13.9776	32.9009	19.5644
NM_001349.4	246.323	249.678	235.872	275.578	262.374	240.931	155.022	209.382	171.651	206.17	178.605	176.08
NM_001349206.2	36.8276	44.4714	36.288	22.0163	21.4574	25.1522	62.0087	22.946	45.7736	20.9664	37.601	9.78221
NM_001349232.2	34.4127	34.6996	47.7119	42.6847	43.7871	42.0306	36.1717	25.8142	34.3302	69.888	51.7014	45.6503
NM_001349278.2	45.8836	55.8385	50.3999	53.3184	59.4876	55.5995	51.6739	54.4967	57.217	76.8768	51.7014	88.0399
NM_001349338.3	36.2239	46.2662	47.7119	28.0071	29.1332	42.6925	20.6696	43.0237	37.1911	27.9552	42.3011	35.8681
NM_001349723.3	12.0746	16.951	20.496	13.7789	16.0495	21.1808	25.8369	17.2095	11.4434	20.9664	23.5006	26.0859
NM_001349798.2	9.05598	11.5665	12.768	17.2236	18.8407	18.2022	36.1717	40.1555	17.1651	38.4384	28.2007	35.8681
NM_001349884.2	17.5082	23.1331	18.144	23.514	22.1552	23.4974	20.6696	17.2095	11.4434	20.9664	23.5006	19.5644
NM_001350134.2	47.0911	36.4944	39.3119	35.4957	24.4231	26.8069	36.1717	25.8142	20.026	17.472	23.5006	26.0859
NM_001350197.2	42.865	39.8846	38.9759	35.6454	30.5288	35.4116	5.16739	20.0777	22.8868	38.4384	32.9009	16.3037
NM_001350599.2	59.1657	64.2143	55.1039	51.2216	47.7995	42.0306	77.5108	57.3649	48.6345	55.9104	70.5019	32.6074
NM_001350605.2	179.308	166.518	184.128	132.547	133.455	143.963	279.039	195.041	154.486	101.338	112.803	133.69
NM_001350770.2	11.4709	14.5579	11.76	8.83648	8.19918	6.94994	5.16739	11.473	17.1651	17.472	18.8005	19.5644
NM_001350814.2	41.0538	39.6852	47.0399	33.2491	32.9712	32.764	87.8456	80.3109	77.243	45.4272	75.202	71.7362
NM_001351015.2	16.3008	20.74	17.136	40.7377	32.4478	27.7998	20.6696	0	14.3043	38.4384	51.7014	29.3466
NM_001351132.2	7.24478	18.1475	18.816	17.673	15.5261	15.5546	5.16739	28.6825	22.8868	17.472	18.8005	35.8681
NM_001351169.2	115.313	107.489	103.152	103.791	101.181	103.918	113.683	134.808	117.295	115.315	89.3024	140.212
NM_001351264.2	35.0164	36.0956	34.608	40.2883	35.7624	32.433	20.6696	22.946	5.7217	24.4608	28.2007	26.0859
NM_001351365.2	108.672	48.6593	86.3519	58.7101	88.6209	154.553	449.563	453.183	497.788	545.127	761.42	560.847
NM_001351411.2	42.2612	76.1797	62.4959	66.7978	69.2569	64.5351	31.0043	60.2332	57.217	38.4384	47.0012	48.911
NM_001351601.3	18.7157	19.5435	12.432	14.9771	9.59478	10.9213	20.6696	20.0777	25.7477	27.9552	14.1004	22.8251
NM_001351695.2	88.7486	81.9629	77.9519	79.079	76.2349	64.8661	82.6782	106.125	85.8256	73.3824	98.7026	104.344
NM_001351774.2	8.45225	12.9625	12.096	27.2583	24.0742	29.4545	5.16739	25.8142	11.4434	17.472	14.1004	13.0429
NM_001352027.3	23.5455	23.3325	21.84	19.3204	25.4698	24.4903	25.8369	45.892	22.8868	34.944	23.5006	22.8251
NM_001352389.2	26.5642	34.3008	27.888	42.3851	42.217	39.052	15.5022	22.946	54.3562	52.416	47.0012	35.8681
NM_001352514.2	20.5269	25.1273	23.184	29.6546	27.9121	37.3973	41.3391	37.2872	34.3302	34.944	56.4015	48.911
NM_001352688.2	21.1306	15.555	18.48	19.3204	24.772	11.2523	25.8369	17.2095	45.7736	34.944	84.6022	32.6074
NM_001352754.2	38.6388	37.0927	32.928	44.7815	46.7528	47.9877	98.1804	43.0237	74.3821	76.8768	37.601	45.6503
NM_001353214.3	42.865	49.6564	50.0639	60.0581	52.3352	58.909	31.0043	40.1555	25.7477	55.9104	42.3011	58.6932
NM_001353345.2	34.4127	27.1216	23.52	17.3734	20.7596	20.8498	124.017	80.3109	100.13	59.4048	51.7014	68.4754
NM_001353694.2	27.7717	33.3037	33.936	22.3158	22.5041	23.4974	51.6739	86.0474	62.9387	41.9328	42.3011	65.2147
NM_001353788.2	50.1097	33.9019	41.3279	20.8181	25.9931	30.4474	62.0087	40.1555	42.9128	27.9552	28.2007	45.6503
NM_001353812.2	24.753	19.3441	26.88	24.5624	23.8997	19.526	20.6696	20.0777	20.026	3.4944	14.1004	13.0429
NM_001353921.2	23.5455	23.9308	29.232	32.3505	29.1332	29.4545	20.6696	34.419	37.1911	17.472	37.601	68.4754
NM_001354046.2	54.3359	57.6333	55.4399	59.6088	65.419	55.2686	77.5108	63.1014	62.9387	52.416	56.4015	84.7791
NM_001354587.1	15.0933	12.3642	7.05599	19.62	19.1896	19.1951	51.6739	63.1014	77.243	143.27	94.0025	71.7362
NM_001354689.3	76.6739	83.5583	82.3199	74.4361	69.4313	89.0254	134.352	120.466	151.625	129.293	126.903	104.344
NM_001354761.2	348.353	331.242	332.976	358.701	378.558	356.433	335.88	295.429	294.668	241.114	310.208	326.074
NM_001354909.2	147.311	146.975	151.2	136.741	130.315	135.027	160.189	126.203	114.434	73.3824	112.803	123.908
NM_001354930.2	59.7695	61.8212	52.4159	47.028	42.0426	40.7068	36.1717	51.6284	62.9387	31.4496	51.7014	42.3896
NM_001355197.2	14.4896	9.57231	9.07199	16.9241	15.5261	24.8212	10.3348	8.60474	11.4434	45.4272	18.8005	22.8251
NM_001355204.2	26.5642	17.5492	20.496	26.6592	27.9121	19.526	31.0043	11.473	28.6085	13.9776	9.40025	13.0429
NM_001355237.2	26.5642	28.9164	28.56	44.1824	35.7624	42.0306	31.0043	37.2872	40.0519	48.9216	47.0012	26.0859
NM_001355283.3	494.456	415.797	511.727	458.598	443.628	472.927	744.104	765.822	740.961	628.992	639.217	743.448
NM_001355404.2	59.1657	57.8327	55.1039	92.2588	90.8887	104.249	36.1717	71.7062	65.7996	80.3712	70.5019	74.9969
NM_001355407.2	32.6015	39.2864	43.3439	26.9587	28.9588	30.4474	51.6739	22.946	40.0519	17.472	14.1004	9.78221
NM_001356.5	861.525	763.791	822.191	609.417	608.658	561.621	785.443	717.062	823.925	520.666	587.516	511.936
NM_001357.5	930.955	917.147	942.479	792.887	991.751	801.56	1379.69	1239.08	1278.8	974.938	1264.33	981.481
NM_001358.3	708.781	624.195	608.831	405.729	437.696	457.372	723.435	742.876	769.569	576.576	634.517	554.325
NM_001358291.2	48.2986	51.2518	46.7039	108.434	103.798	95.6444	36.1717	28.6825	25.7477	80.3712	112.803	48.911
NM_001358451.3	6.64105	10.37	11.424	12.5807	8.02473	10.2594	15.5022	11.473	25.7477	3.4944	14.1004	6.52147
NM_001358921.2	16.3008	19.5435	18.48	18.8711	20.4107	20.1879	5.16739	11.473	11.4434	20.9664	9.40025	13.0429
NM_001359.2	158.178	188.256	184.8	240.831	214.051	217.103	118.85	123.335	168.79	164.237	136.304	136.951
NM_001359084.1	21.7343	20.5406	22.176	14.9771	17.0962	17.5403	41.3391	34.419	25.7477	13.9776	32.9009	19.5644
NM_001360.3	259.605	253.866	227.136	101.994	106.764	117.818	361.717	375.74	308.972	104.832	155.104	179.34
NM_001360016.2	103.238	101.108	105.504	81.026	89.1442	94.9825	82.6782	83.1792	102.991	76.8768	51.7014	120.647
NM_001360452.2	121.954	119.654	114.576	116.971	121.941	127.085	82.6782	65.9697	88.6864	41.9328	56.4015	58.6932
NM_001361041.2	16.3008	15.3556	14.448	18.7213	20.2363	17.5403	0	17.2095	17.1651	13.9776	0	9.78221
NM_001361665.2	8.45225	8.77462	13.44	10.3342	8.37363	13.238	5.16739	0	5.7217	17.472	0	6.52147
NM_001363.5	117.728	107.489	104.832	98.5492	93.1566	87.7016	93.013	60.2332	34.3302	69.888	122.203	84.7791
NM_001363059.2	16.9045	15.1562	11.424	17.5232	19.1896	14.5618	5.16739	20.0777	2.86085	3.4944	14.1004	22.8251
NM_001363118.2	19.9232	14.159	14.784	12.1314	13.956	14.5618	25.8369	31.5507	51.4953	24.4608	42.3011	29.3466
NM_001363540.2	24.1493	25.3267	29.232	18.272	21.283	24.1593	31.0043	25.8142	28.6085	27.9552	28.2007	32.6074
NM_001363541.2	281.943	297.141	280.224	194.402	221.378	233.319	423.726	398.686	429.128	401.856	578.115	345.638
NM_001363644.2	6.64105	11.766	15.456	14.6775	13.6071	14.5618	15.5022	8.60474	11.4434	13.9776	23.5006	16.3037
NM_001363705.2	73.0516	73.5872	70.2239	53.3184	66.989	56.5924	93.013	86.0474	60.0779	132.787	79.9021	97.8221
NM_001363758.2	37.4314	29.5146	37.296	28.4564	31.2267	43.3544	31.0043	20.0777	17.1651	38.4384	42.3011	22.8251
NM_001363818.2	38.6388	31.5089	26.544	39.2399	36.4602	47.3258	25.8369	31.5507	11.4434	20.9664	18.8005	32.6074
NM_001363845.2	13.2821	17.1504	13.44	17.673	13.7816	18.8641	20.6696	14.3412	17.1651	17.472	9.40025	16.3037
NM_001363941.2	41.0538	51.4512	52.4159	60.0581	49.544	47.3258	51.6739	45.892	34.3302	41.9328	32.9009	29.3466
NM_001364013.2	30.7903	16.5521	25.536	22.7652	29.6566	38.7211	25.8369	28.6825	28.6085	45.4272	37.601	48.911
NM_001364564.1	55.5433	69.1999	71.5679	107.535	117.929	131.387	77.5108	126.203	125.877	132.787	197.405	195.644
NM_001364614.2	27.1679	27.9193	39.3119	46.4289	38.2047	47.6567	25.8369	60.2332	22.8868	48.9216	61.1016	52.1718
NM_001364716.4	61.5807	48.8587	54.0959	51.3714	55.9986	66.8518	186.026	206.514	145.903	129.293	108.103	159.776
NM_001364730.1	45.2799	47.6622	39.6479	48.376	56.8709	50.3043	15.5022	25.8142	54.3562	41.9328	65.8017	58.6932
NM_001364857.2	7.84851	10.5694	11.76	9.43556	10.6415	14.2308	67.1761	68.8379	68.6604	45.4272	84.6022	52.1718
NM_001364905.1	152.744	142.189	133.056	178.677	176.195	151.906	108.515	180.7	188.816	230.63	211.506	179.34
NM_001364929.1	260.208	277.996	258.384	273.182	283.482	258.141	346.215	321.244	311.833	324.979	437.112	371.724
NM_001365088.1	12.0746	13.3614	15.792	13.0301	11.8626	14.5618	31.0043	31.5507	20.026	13.9776	18.8005	32.6074
NM_001365225.1	32.6015	32.9048	35.616	33.0993	32.6223	30.1164	41.3391	40.1555	31.4694	20.9664	28.2007	39.1288
NM_001365324.3	18.7157	24.1302	16.464	17.673	18.1429	18.2022	0	28.6825	11.4434	20.9664	18.8005	22.8251
NM_001365479.2	18.7157	27.321	27.216	29.8044	31.75	29.7855	56.8413	8.60474	20.026	45.4272	32.9009	26.0859
NM_001365480.1	193.798	221.759	204.96	236.937	230.275	231.003	170.524	143.412	208.842	255.091	178.605	195.644
NM_001365536.1	35.6202	32.9048	29.568	39.3897	44.6593	45.0091	62.0087	20.0777	25.7477	48.9216	32.9009	42.3896
NM_001365588.1	72.4478	90.937	79.9679	59.1595	67.5124	81.4136	51.6739	48.7602	51.4953	27.9552	9.40025	19.5644
NM_001365613.2	57.9583	65.012	61.1519	50.9221	55.9986	66.5208	77.5108	97.5204	37.1911	59.4048	89.3024	68.4754
NM_001365621.2	67.618	61.4224	59.4719	50.6225	56.3475	53.6138	113.683	100.389	91.5473	104.832	98.7026	88.0399
NM_001365631.1	170.856	160.536	149.856	134.943	147.76	140.654	129.185	94.6522	140.182	171.226	211.506	156.515
NM_001365635.2	95.3896	125.238	119.952	154.563	154.738	135.027	82.6782	103.257	91.5473	150.259	164.504	146.733
NM_001365715.1	126.18	133.614	131.04	97.5008	94.9011	92.6659	113.683	114.73	97.269	115.315	117.503	120.647
NM_001365792.1	15.697	21.7371	25.2	20.2191	20.5852	19.1951	41.3391	17.2095	25.7477	6.9888	9.40025	29.3466
NM_001365896.1	734.742	746.441	756.335	678.162	631.162	766.148	496.069	602.332	466.319	265.574	361.91	466.285
NM_001365919.1	32.6015	28.9164	27.888	31.4519	29.6566	22.8355	87.8456	91.7839	62.9387	45.4272	75.202	58.6932
NM_001365951.3	578.375	555.194	562.127	542.769	550.74	534.814	599.417	522.021	606.501	538.138	526.414	603.236
NM_001365999.1	21.1306	29.3152	24.528	25.461	28.7843	19.526	93.013	60.2332	94.4081	66.3936	126.903	97.8221
NM_001366006.2	701.536	832.193	748.943	937.266	938.195	909.118	434.061	513.416	426.267	663.936	578.115	697.797
NM_001366057.1	53.1284	40.6823	33.264	40.2883	38.0302	35.0806	72.3435	43.0237	54.3562	41.9328	65.8017	52.1718
NM_001366145.2	19.9232	16.5521	19.152	13.9287	17.4451	19.526	41.3391	57.3649	22.8868	24.4608	14.1004	29.3466
NM_001366178.1	9.65971	20.1417	15.792	11.8319	14.4794	14.8927	62.0087	65.9697	54.3562	62.8992	98.7026	84.7791
NM_001366207.1	62.7881	66.6074	57.1199	57.0627	55.8242	54.6067	62.0087	54.4967	37.1911	52.416	42.3011	65.2147
NM_001366230.1	29.5829	42.0783	36.96	47.3276	48.6717	50.9662	5.16739	31.5507	8.58256	24.4608	28.2007	29.3466
NM_001366244.2	58.562	45.4685	51.7439	31.7514	37.158	32.1021	51.6739	63.1014	40.0519	24.4608	47.0012	22.8251
NM_001366245.2	33.2053	32.1071	39.3119	44.1824	41.1703	40.7068	36.1717	28.6825	48.6345	17.472	32.9009	35.8681
NM_001366282.2	315.148	303.123	301.392	310.475	309.475	279.321	211.863	301.166	274.642	279.552	277.307	322.813
NM_001366293.2	204.061	203.412	189.84	232.744	238.474	239.607	160.189	94.6522	91.5473	69.888	126.903	159.776
NM_001366299.1	359.22	322.268	313.152	268.839	279.644	312.085	521.906	427.369	486.345	443.789	408.911	420.635
NM_001366306.2	30.1866	26.7227	19.152	17.5232	19.8874	11.2523	0	22.946	25.7477	31.4496	9.40025	29.3466
NM_001366318.2	59.1657	51.0523	48.0479	41.786	46.9272	42.3615	139.52	126.203	94.4081	87.36	70.5019	84.7791
NM_001366335.1	102.634	91.7347	89.7119	86.7173	106.415	98.292	134.352	100.389	91.5473	83.8656	112.803	153.255
NM_001366418.1	76.0702	73.1883	71.9039	66.3485	74.8393	86.7088	72.3435	108.993	88.6864	76.8768	65.8017	120.647
NM_001366432.2	147.914	137.004	130.368	136.89	127.872	127.085	118.85	83.1792	105.852	97.8432	98.7026	94.5613
NM_001366446.1	16.3008	18.5464	21.168	21.567	23.3764	19.1951	10.3348	14.3412	14.3043	31.4496	28.2007	9.78221
NM_001366458.2	21.1306	18.3469	25.872	13.0301	15.7006	14.2308	20.6696	11.473	11.4434	13.9776	18.8005	13.0429
NM_001366481.3	202.25	164.125	187.488	171.937	167.298	180.698	211.863	203.646	154.486	143.27	211.506	211.948
NM_001366508.1	30.7903	47.6622	38.304	36.8436	44.136	41.0377	72.3435	80.3109	68.6604	94.3488	94.0025	123.908
NM_001366521.1	117.728	134.411	143.808	184.518	168.519	162.165	51.6739	103.257	51.4953	146.765	108.103	120.647
NM_001366661.1	42.865	42.0783	37.296	28.9058	33.1456	34.7497	67.1761	74.5744	74.3821	66.3936	51.7014	78.2577
NM_001366673.1	136.443	146.377	128.352	162.951	159.971	140.654	51.6739	83.1792	68.6604	104.832	42.3011	61.954
NM_001366683.2	15.0933	27.7198	31.248	20.9679	27.3887	20.8498	15.5022	22.946	28.6085	31.4496	23.5006	29.3466
NM_001366686.3	34.4127	28.9164	26.208	25.1615	24.5975	32.433	67.1761	48.7602	60.0779	45.4272	28.2007	35.8681
NM_001366722.1	11.4709	10.7689	8.73599	6.58991	8.54808	4.96424	25.8369	14.3412	11.4434	3.4944	4.70012	9.78221
NM_001366735.2	126.784	103.301	115.92	113.976	112.695	102.263	67.1761	80.3109	68.6604	101.338	112.803	94.5613
NM_001366845.3	98.4083	106.492	104.496	111.13	119.673	116.494	98.1804	120.466	137.321	132.787	150.404	156.515
NM_001366854.1	10.2634	11.1677	12.432	14.378	12.9093	15.5546	25.8369	37.2872	22.8868	6.9888	28.2007	29.3466
NM_001367479.1	15.0933	11.1677	11.76	19.0209	19.7129	16.8784	15.5022	8.60474	22.8868	20.9664	28.2007	19.5644
NM_001367534.1	15.697	25.1273	23.184	15.1268	15.3516	18.2022	31.0043	28.6825	22.8868	31.4496	23.5006	19.5644
NM_001367549.1	115.917	112.076	115.92	124.16	119.848	114.839	155.022	123.335	111.573	192.192	145.704	127.169
NM_001367561.1	278.32	282.583	270.144	343.574	381	339.554	268.704	223.723	228.868	307.507	357.209	257.598
NM_001367710.1	54.9396	39.2864	36.288	25.9103	30.1799	40.7068	160.189	94.6522	77.243	94.3488	94.0025	81.5184
NM_001367721.1	118.331	129.226	122.976	143.331	139.735	147.273	72.3435	97.5204	102.991	104.832	70.5019	88.0399
NM_001367773.1	65.203	55.0408	59.8079	62.9037	65.2445	61.5566	72.3435	63.1014	51.4953	76.8768	61.1016	78.2577
NM_001367774.2	11.4709	12.1648	15.12	15.4264	14.3049	17.8713	5.16739	28.6825	5.7217	10.4832	23.5006	9.78221
NM_001367799.1	41.6575	46.8645	42.3359	31.9012	35.5879	39.052	51.6739	74.5744	88.6864	59.4048	98.7026	61.954
NM_001367805.3	146.707	186.062	162.624	116.971	131.012	137.344	82.6782	117.598	91.5473	122.304	47.0012	110.865
NM_001367806.1	7.84851	11.5665	15.792	13.0301	16.5728	20.5189	15.5022	20.0777	5.7217	17.472	9.40025	16.3037
NM_001367823.1	42.865	25.925	31.248	23.2145	21.6319	25.4831	51.6739	25.8142	34.3302	24.4608	28.2007	39.1288
NM_001367834.3	15.0933	13.3614	15.12	8.38716	6.97802	7.61184	36.1717	40.1555	62.9387	10.4832	32.9009	29.3466
NM_001367871.1	15.697	12.5637	11.088	7.189	9.76923	7.94279	62.0087	48.7602	42.9128	31.4496	18.8005	48.911
NM_001367909.1	13.2821	19.7429	12.432	23.6638	25.2953	29.7855	5.16739	11.473	8.58256	13.9776	9.40025	22.8251
NM_001367916.1	166.63	176.689	168.672	218.665	199.223	200.224	134.352	129.071	143.043	122.304	108.103	133.69
NM_001367949.2	389.407	347.395	353.136	386.109	412.401	388.535	496.069	524.889	380.493	632.487	672.118	502.153
NM_001368238.1	39.8463	31.3094	47.7119	33.5487	38.2047	37.0663	72.3435	94.6522	97.269	38.4384	42.3011	45.6503
NM_001368809.2	36.8276	37.2921	35.616	27.5578	29.6566	34.0878	56.8413	48.7602	60.0779	48.9216	75.202	52.1718
NM_001368882.1	6.64105	12.7631	10.416	8.68671	13.956	8.93564	20.6696	11.473	25.7477	34.944	23.5006	35.8681
NM_001369387.1	6.64105	12.3642	12.432	10.0346	11.8626	14.8927	5.16739	5.73649	8.58256	6.9888	4.70012	13.0429
NM_001369441.2	45.2799	49.0581	50.7359	52.8691	49.8929	50.3043	36.1717	91.7839	65.7996	59.4048	112.803	58.6932
NM_001369450.1	27.1679	21.3383	23.856	14.378	14.1305	20.1879	41.3391	40.1555	22.8868	34.944	47.0012	39.1288
NM_001369598.1	38.0351	37.2921	37.968	27.5578	23.0275	29.7855	41.3391	34.419	42.9128	27.9552	14.1004	42.3896
NM_001369623.2	45.8836	45.4685	46.0319	43.5833	47.7995	41.3687	82.6782	103.257	82.9647	101.338	75.202	120.647
NM_001369783.1	48.9023	32.7054	32.592	52.4198	51.8118	51.2972	5.16739	22.946	28.6085	38.4384	32.9009	52.1718
NM_001369789.1	33.2053	26.1244	18.816	32.65	27.9121	33.4259	98.1804	77.4427	40.0519	59.4048	65.8017	55.4325
NM_001369817.2	17.5082	17.3498	13.104	29.5048	22.5041	32.1021	15.5022	28.6825	22.8868	24.4608	47.0012	35.8681
NM_001370062.2	68.2217	76.5785	64.8479	49.4244	60.1854	69.1684	93.013	83.1792	94.4081	55.9104	94.0025	84.7791
NM_001370100.5	63.3918	63.4166	63.1679	54.5166	53.7308	59.9019	31.0043	45.892	42.9128	38.4384	32.9009	42.3896
NM_001370150.2	21.1306	14.7573	13.776	17.8227	17.794	18.8641	20.6696	34.419	20.026	27.9552	18.8005	19.5644
NM_001370181.1	55.5433	63.616	59.8079	62.9037	65.7679	58.909	15.5022	45.892	20.026	17.472	28.2007	39.1288
NM_001370259.2	20.5269	25.5262	27.552	22.3158	24.0742	21.8427	41.3391	37.2872	40.0519	41.9328	28.2007	71.7362
NM_001370285.1	9.05598	14.7573	10.08	22.1661	16.9217	19.526	10.3348	8.60474	5.7217	13.9776	4.70012	16.3037
NM_001370298.3	7.84851	17.1504	16.8	26.3597	25.8187	30.7783	15.5022	20.0777	20.026	41.9328	9.40025	55.4325
NM_001370300.1	8.45225	13.1619	9.74399	8.38716	7.67582	8.27374	0	2.86825	5.7217	6.9888	4.70012	3.26074
NM_001370302.1	14.4896	10.9683	16.8	9.28579	8.37363	8.27374	20.6696	22.946	14.3043	13.9776	14.1004	16.3037
NM_001370348.2	155.763	155.949	149.184	150.969	144.968	161.834	82.6782	120.466	123.017	178.214	136.304	195.644
NM_001370472.1	67.618	55.6391	50.7359	43.4335	52.5096	48.6496	82.6782	86.0474	71.5213	69.888	61.1016	84.7791
NM_001370476.2	22.3381	17.9481	11.76	20.0693	15.1772	19.857	0	17.2095	2.86085	17.472	9.40025	16.3037
NM_001370595.2	17.5082	24.7285	20.832	26.6592	24.9464	21.8427	10.3348	0	11.4434	17.472	14.1004	13.0429
NM_001370597.1	9.65971	8.17635	13.104	13.6291	8.02473	9.26659	87.8456	45.892	54.3562	62.8992	23.5006	71.7362
NM_001370658.1	13.8858	15.3556	9.74399	14.8273	15.5261	15.2237	25.8369	14.3412	8.58256	13.9776	4.70012	16.3037
NM_001371072.1	253.567	223.753	222.768	217.767	226.437	230.672	253.202	283.956	217.425	269.069	272.607	273.902
NM_001371189.2	57.3545	43.2748	51.4079	53.3184	52.6841	67.8446	77.5108	80.3109	102.991	101.338	89.3024	84.7791
NM_001371333.1	133.425	129.825	122.976	109.333	109.555	112.854	108.515	123.335	100.13	73.3824	65.8017	110.865
NM_001371340.3	114.105	81.9629	95.7599	60.5074	67.1635	71.4851	87.8456	68.8379	71.5213	48.9216	94.0025	35.8681
NM_001371445.1	80.9001	87.7462	77.2799	66.7978	70.1291	67.8446	41.3391	45.892	42.9128	45.4272	18.8005	26.0859
NM_001371533.1	49.506	44.4714	40.9919	46.7285	48.6717	63.5423	31.0043	20.0777	25.7477	17.472	14.1004	19.5644
NM_001371589.1	37.4314	51.0523	47.7119	35.6454	37.8558	46.002	201.528	106.125	131.599	146.765	117.503	156.515
NM_001371596.2	21.1306	18.9452	23.184	31.1523	27.9121	25.4831	25.8369	22.946	25.7477	27.9552	14.1004	22.8251
NM_001371623.1	74.8628	72.1912	59.8079	52.8691	66.4657	71.1541	165.356	106.125	111.573	118.81	112.803	94.5613
NM_001371910.2	59.1657	44.0725	43.6799	30.1039	27.3887	24.8212	56.8413	31.5507	22.8868	41.9328	37.601	29.3466
NM_001371928.1	24.753	29.5146	22.848	22.6154	16.7473	22.1736	87.8456	80.3109	94.4081	83.8656	79.9021	88.0399
NM_001372043.1	25.3567	25.925	25.2	24.7122	27.5632	28.4617	20.6696	28.6825	11.4434	20.9664	23.5006	35.8681
NM_001372052.1	237.267	256.658	243.6	259.403	259.408	251.191	232.533	255.274	234.59	136.282	183.305	228.251
NM_001372078.1	45.2799	59.827	64.8479	47.6271	52.8585	53.9448	93.013	160.622	97.269	181.709	145.704	182.601
NM_001372080.1	13.2821	9.57231	12.432	16.1752	16.2239	15.5546	36.1717	37.2872	31.4694	45.4272	37.601	26.0859
NM_001372327.1	44.0724	38.4887	31.248	36.6938	38.2047	50.6353	31.0043	31.5507	45.7736	31.4496	47.0012	39.1288
NM_001372574.1	156.367	134.81	132.384	91.3602	108.159	102.594	108.515	163.49	117.295	69.888	84.6022	97.8221
NM_001374258.1	34.4127	33.3037	32.256	27.4081	26.8654	30.7783	31.0043	22.946	20.026	31.4496	42.3011	32.6074
NM_001374353.1	39.2426	41.2806	44.3519	28.6062	32.7967	34.0878	144.687	160.622	108.712	104.832	117.503	97.8221
NM_001374736.1	341.712	360.956	350.448	416.962	398.096	368.678	635.589	725.667	592.196	765.274	686.218	567.368
NM_001374828.1	85.1262	78.1739	76.6079	60.0581	71.6992	66.5208	217.03	189.304	183.095	80.3712	164.504	127.169
NM_001375405.1	33.2053	30.9106	26.208	43.134	41.1703	39.052	20.6696	20.0777	22.8868	55.9104	47.0012	45.6503
NM_001375462.1	65.203	76.9774	73.2479	80.5767	81.6429	79.4279	113.683	129.071	82.9647	104.832	89.3024	117.386
NM_001375505.1	1276.89	1017.66	1031.18	1208.2	1129.04	1095.11	1214.34	957.995	935.499	1058.8	1278.43	1160.82
NM_001375524.1	222.777	229.935	230.832	204.737	245.975	222.067	434.061	384.345	351.885	349.44	361.91	309.77
NM_001375567.1	99.6158	108.686	111.552	130.9	147.236	142.97	217.03	200.777	197.399	269.069	296.108	241.294
NM_001375584.1	80.2963	97.7174	88.0319	68.595	72.397	68.8375	103.348	91.7839	85.8256	76.8768	89.3024	120.647
NM_001375635.1	21.7343	14.159	14.448	13.9287	14.3049	20.5189	15.5022	14.3412	20.026	10.4832	9.40025	9.78221
NM_001375670.1	108.068	131.819	125.664	115.773	111.823	109.875	129.185	123.335	120.156	94.3488	75.202	130.429
NM_001375765.1	13.2821	15.7544	15.792	10.1844	9.76923	9.92848	31.0043	31.5507	57.217	38.4384	18.8005	29.3466
NM_001375808.2	39.2426	47.2633	49.3919	68.7448	71.0014	61.2257	25.8369	40.1555	48.6345	48.9216	84.6022	74.9969
NM_001375883.1	10.8672	15.7544	20.16	13.6291	12.7349	15.2237	51.6739	34.419	45.7736	31.4496	28.2007	16.3037
NM_001375905.1	18.112	8.5752	12.096	10.0346	7.50137	6.94994	10.3348	8.60474	11.4434	10.4832	4.70012	6.52147
NM_001375912.1	60.3732	96.3214	78.6239	89.8625	94.9011	115.501	263.537	306.902	268.92	237.619	404.211	397.81
NM_001376.5	1047.47	978.37	1002.62	945.203	1036.59	836.309	1431.37	1259.16	1084.26	1191.59	1217.33	1001.05
NM_001376000.2	134.028	125.038	106.176	178.077	168.694	164.813	93.013	94.6522	68.6604	209.664	61.1016	130.429
NM_001376013.1	152.744	150.365	139.104	175.831	165.03	163.158	144.687	123.335	108.712	136.282	159.804	88.0399
NM_001376049.1	24.753	25.5262	22.512	49.4244	44.6593	48.3186	10.3348	14.3412	11.4434	45.4272	14.1004	16.3037
NM_001376113.1	79.6926	62.22	68.5439	47.028	51.114	50.6353	103.348	63.1014	74.3821	27.9552	42.3011	32.6074
NM_001376223.1	12.6784	13.1619	17.808	20.6684	23.3764	26.8069	25.8369	25.8142	22.8868	41.9328	56.4015	48.911
NM_001376312.2	15.0933	18.7458	14.784	23.6638	20.2363	18.8641	5.16739	8.60474	11.4434	24.4608	14.1004	19.5644
NM_001376342.1	91.7672	76.9774	86.3519	58.5604	56.522	58.2471	170.524	206.514	151.625	55.9104	103.403	153.255
NM_001376376.1	234.248	203.013	214.368	182.421	176.544	167.791	155.022	217.987	185.955	192.192	230.306	169.558
NM_001376558.2	26.5642	20.74	29.232	21.567	23.7253	20.8498	36.1717	25.8142	25.7477	20.9664	32.9009	42.3896
NM_001376587.1	60.3732	68.2027	59.1359	68.2955	83.3874	68.8375	46.5065	68.8379	65.7996	31.4496	61.1016	55.4325
NM_001376852.1	35.0164	38.4887	43.0079	54.6663	54.9519	57.5852	41.3391	22.946	45.7736	59.4048	51.7014	26.0859
NM_001376937.1	208.891	206.004	206.976	110.231	124.732	133.373	211.863	137.676	145.903	76.8768	70.5019	104.344
NM_001377.3	210.702	194.238	200.592	268.539	329.188	277.005	232.533	306.902	231.729	506.688	390.11	306.509
NM_001377137.1	158.178	143.984	130.704	125.358	122.464	129.07	186.026	189.304	128.738	157.248	155.104	179.34
NM_001377229.1	9.05598	17.1504	11.424	36.5441	42.7404	35.0806	31.0043	25.8142	22.8868	27.9552	47.0012	52.1718
NM_001377299.1	137.047	150.365	147.504	154.264	157.18	162.827	108.515	189.304	185.955	143.27	169.204	192.383
NM_001377334.1	20.5269	23.7314	19.152	17.8227	19.5385	15.8856	67.1761	48.7602	45.7736	45.4272	14.1004	29.3466
NM_001377405.1	16.9045	13.7602	15.456	14.0785	13.4327	10.2594	51.6739	37.2872	34.3302	31.4496	51.7014	52.1718
NM_001377448.1	16.3008	13.1619	12.768	7.63831	7.32692	11.5832	62.0087	86.0474	74.3821	52.416	65.8017	35.8681
NM_001377458.1	77.8814	69.9976	78.2879	94.2058	99.9602	83.0683	46.5065	28.6825	68.6604	73.3824	61.1016	61.954
NM_001377500.1	12.0746	12.3642	9.74399	5.39175	6.45467	7.61184	41.3391	48.7602	57.217	34.944	14.1004	22.8251
NM_001377540.1	18.112	18.9452	22.848	22.1661	21.8063	31.4402	25.8369	20.0777	14.3043	20.9664	14.1004	29.3466
NM_001377935.1	25.9605	26.5233	20.832	22.0163	23.8997	22.5046	77.5108	114.73	100.13	55.9104	32.9009	42.3896
NM_001377960.1	48.9023	49.457	65.1839	120.865	121.592	112.854	62.0087	88.9157	123.017	230.63	178.605	149.994
NM_001378.3	527.662	463.659	493.247	569.728	585.107	551.031	620.087	501.943	583.614	527.655	540.514	528.239
NM_001378024.1	36.2239	43.0754	39.6479	33.8482	40.1236	37.7282	149.854	88.9157	71.5213	94.3488	112.803	94.5613
NM_001378026.1	51.3172	47.6622	47.7119	40.2883	37.158	32.764	56.8413	51.6284	42.9128	80.3712	98.7026	68.4754
NM_001378067.1	37.4314	46.8645	49.7279	62.754	64.3723	69.8303	67.1761	123.335	85.8256	150.259	108.103	146.733
NM_001378074.1	48.9023	52.0495	43.0079	43.8828	42.5659	54.6067	93.013	131.939	91.5473	104.832	94.0025	107.604
NM_001378107.1	30.1866	30.7112	28.896	25.0117	29.1332	44.0163	31.0043	37.2872	40.0519	55.9104	89.3024	52.1718
NM_001378120.1	16.9045	15.555	15.12	13.0301	12.5604	17.2094	31.0043	40.1555	20.026	27.9552	42.3011	26.0859
NM_001378122.1	12.6784	20.3412	16.128	30.8528	27.3887	30.1164	20.6696	22.946	28.6085	38.4384	37.601	42.3896
NM_001378204.1	20.5269	26.5233	27.216	29.3551	25.6442	20.5189	25.8369	25.8142	25.7477	55.9104	28.2007	45.6503
NM_001378213.1	24.753	27.5204	20.16	18.272	16.3984	15.5546	87.8456	103.257	117.295	52.416	65.8017	68.4754
NM_001378328.1	85.1262	85.1537	75.9359	76.3831	83.2129	90.6802	480.567	304.034	374.772	300.518	286.708	267.38
NM_001378414.1	10.2634	11.3671	10.752	5.99083	6.10577	7.61184	10.3348	28.6825	28.6085	24.4608	14.1004	16.3037
NM_001378418.1	63.9956	77.7751	65.1839	64.2517	70.6525	80.7517	191.193	169.227	157.347	97.8432	131.603	166.298
NM_001378454.1	125.576	134.411	128.352	150.969	169.915	162.827	201.528	235.196	194.538	377.395	296.108	319.552
NM_001378457.1	115.917	117.859	110.208	132.248	154.214	129.07	175.691	163.49	143.043	171.226	202.105	231.512
NM_001378615.1	25.9605	36.8933	36.96	34.2975	30.0055	29.4545	51.6739	51.6284	48.6345	41.9328	23.5006	42.3896
NM_001378687.1	183.534	159.937	160.272	197.248	196.955	189.634	108.515	108.993	85.8256	125.798	126.903	120.647
NM_001378743.1	12.6784	14.3585	16.128	22.6154	20.0618	19.1951	15.5022	5.73649	17.1651	41.9328	4.70012	6.52147
NM_001378778.1	234.248	238.111	250.32	253.712	292.728	258.802	325.546	355.663	248.894	195.686	366.61	332.595
NM_001378964.1	44.0724	67.405	69.2159	72.7886	70.3036	65.197	82.6782	77.4427	88.6864	55.9104	84.6022	114.126
NM_001378974.1	97.2008	79.3704	92.3999	94.5054	85.6552	85.385	72.3435	51.6284	62.9387	83.8656	61.1016	65.2147
NM_001379029.1	91.1635	88.9428	92.3999	100.496	90.5398	101.271	41.3391	65.9697	65.7996	34.944	70.5019	55.4325
NM_001379081.2	28.3754	37.691	41.3279	48.2262	55.1264	50.3043	31.0043	34.419	42.9128	83.8656	79.9021	104.344
NM_001379110.1	33.2053	44.272	43.3439	46.4289	44.8338	39.7139	25.8369	40.1555	20.026	31.4496	32.9009	16.3037
NM_001379286.1	91.7672	109.683	109.2	78.3301	93.8544	106.897	366.885	312.639	280.363	188.698	267.907	286.945
NM_001379291.1	111.087	112.475	116.928	84.1712	92.9822	113.516	165.356	235.196	188.816	150.259	103.403	163.037
NM_001379313.1	54.9396	60.2258	65.8559	68.4452	66.989	67.8446	41.3391	71.7062	60.0779	38.4384	51.7014	58.6932
NM_001379403.1	96.5971	102.105	102.816	82.8232	73.4437	83.7302	67.1761	114.73	91.5473	122.304	75.202	94.5613
NM_001379451.1	31.9978	31.5089	26.208	28.0071	32.9712	38.3901	62.0087	83.1792	68.6604	55.9104	61.1016	61.954
NM_001379659.1	21.1306	22.9337	25.872	21.7168	22.3297	23.4974	67.1761	103.257	60.0779	83.8656	79.9021	97.8221
NM_001381853.1	45.2799	48.8587	40.3199	64.701	59.4876	47.9877	31.0043	48.7602	42.9128	90.8544	79.9021	45.6503
NM_001381865.2	49.506	42.2777	45.3599	28.756	34.1923	34.7497	103.348	74.5744	82.9647	45.4272	84.6022	84.7791
NM_001382.4	42.2612	41.48	46.3679	30.8528	36.9835	40.7068	46.5065	45.892	65.7996	55.9104	65.8017	61.954
NM_001382226.1	106.257	96.122	108.528	78.4799	86.5275	86.0469	113.683	91.7839	74.3821	83.8656	56.4015	104.344
NM_001382241.1	106.257	111.677	103.152	72.1895	69.6058	82.4064	232.533	229.46	174.512	195.686	159.804	146.733
NM_001382266.1	20.5269	22.7342	24.192	21.567	19.8874	26.145	36.1717	40.1555	51.4953	59.4048	47.0012	45.6503
NM_001382293.1	61.5807	57.035	52.7519	73.6872	73.6181	51.9591	25.8369	37.2872	51.4953	3.4944	32.9009	26.0859
NM_001382294.1	37.4314	38.6881	49.7279	43.134	46.9272	36.4044	41.3391	17.2095	11.4434	6.9888	9.40025	16.3037
NM_001382309.1	15.0933	11.3671	10.416	8.68671	7.67582	8.60469	72.3435	60.2332	65.7996	41.9328	98.7026	48.911
NM_001382344.1	236.059	102.304	171.696	74.2863	108.857	106.897	149.854	177.831	163.069	97.8432	98.7026	107.604
NM_001382347.1	67.618	75.382	72.5759	118.768	117.58	112.854	98.1804	88.9157	57.217	125.798	89.3024	127.169
NM_001382391.1	16.3008	21.7371	20.496	20.0693	15.875	13.5689	62.0087	45.892	25.7477	52.416	28.2007	39.1288
NM_001382430.1	33.2053	31.11	29.904	30.2537	34.8901	46.9948	149.854	88.9157	123.017	90.8544	108.103	127.169
NM_001382507.1	16.3008	18.5464	12.768	27.2583	27.9121	22.1736	51.6739	34.419	22.8868	83.8656	37.601	42.3896
NM_001382508.1	88.1449	92.333	92.7359	102.293	99.9602	119.804	36.1717	88.9157	68.6604	108.326	75.202	130.429
NM_001382548.1	176.29	177.886	169.68	128.503	136.595	134.035	165.356	157.754	188.816	139.776	155.104	143.472
NM_001382567.1	16.3008	16.3527	15.12	18.5716	17.2706	20.5189	46.5065	25.8142	28.6085	38.4384	42.3011	26.0859
NM_001382683.1	15.0933	14.9567	11.424	14.2282	11.8626	14.5618	20.6696	11.473	2.86085	3.4944	4.70012	13.0429
NM_001382779.1	13.8858	15.7544	10.08	10.484	13.6071	9.92848	67.1761	63.1014	68.6604	38.4384	51.7014	39.1288
NM_001384125.1	98.4083	114.07	104.832	142.282	147.411	138.668	180.859	174.963	128.738	276.058	258.507	277.163
NM_001384369.1	24.1493	24.9279	20.832	20.0693	27.9121	28.7926	51.6739	65.9697	51.4953	45.4272	23.5006	65.2147
NM_001384528.1	57.3545	59.0293	60.1439	38.0418	43.6126	47.9877	217.03	160.622	145.903	101.338	94.0025	107.604
NM_001384574.2	43.4687	40.0841	27.888	24.862	27.3887	34.0878	144.687	111.862	123.017	48.9216	117.503	110.865
NM_001384609.1	10.8672	15.3556	14.448	17.8227	16.9217	23.1665	36.1717	25.8142	28.6085	31.4496	32.9009	16.3037
NM_001384647.1	230.626	225.149	221.76	193.204	195.559	224.053	170.524	131.939	160.208	83.8656	98.7026	133.69
NM_001384732.1	60.3732	72.7895	62.1599	104.54	112.87	107.559	108.515	97.5204	82.9647	143.27	169.204	140.212
NM_001384980.1	17.5082	14.3585	14.112	7.78808	8.19918	19.857	258.369	496.207	308.972	125.798	413.611	443.46
NM_001385012.1	230.626	228.34	218.736	241.281	252.43	214.455	284.206	252.406	286.085	262.08	343.109	329.334
NM_001385016.1	33.2053	35.0985	33.936	32.0509	33.3201	31.7711	20.6696	20.0777	28.6085	38.4384	65.8017	35.8681
NM_001385026.1	44.0724	54.4425	48.0479	32.3505	40.1236	40.0449	72.3435	45.892	60.0779	55.9104	47.0012	101.083
NM_001385079.1	16.3008	17.7487	13.44	16.4748	13.7816	19.857	10.3348	11.473	22.8868	45.4272	28.2007	71.7362
NM_001385109.1	39.8463	43.6737	52.4159	31.0026	41.3448	37.0663	103.348	80.3109	85.8256	41.9328	70.5019	65.2147
NM_001385174.1	13.8858	11.1677	11.76	17.3734	16.3984	13.5689	62.0087	34.419	37.1911	52.416	32.9009	58.6932
NM_001385305.1	62.7881	86.5497	91.7279	122.812	117.231	134.696	87.8456	97.5204	102.991	104.832	94.0025	146.733
NM_001385408.1	16.9045	12.9625	15.456	13.7789	18.3173	23.1665	46.5065	65.9697	62.9387	101.338	79.9021	101.083
NM_001385469.3	21.1306	13.7602	19.152	17.9725	23.2019	27.1379	77.5108	28.6825	62.9387	62.8992	94.0025	88.0399
NM_001385482.1	20.5269	20.74	18.48	17.5232	16.5728	20.1879	36.1717	11.473	11.4434	17.472	9.40025	26.0859
NM_001385682.1	740.175	717.724	711.311	749.303	810.846	830.352	651.091	610.937	652.274	691.891	770.82	665.19
NM_001385745.1	15.697	20.74	27.552	25.461	21.9808	31.4402	20.6696	48.7602	31.4694	45.4272	18.8005	58.6932
NM_001385875.1	9.65971	11.766	11.76	10.484	12.2115	11.9142	15.5022	25.8142	37.1911	10.4832	23.5006	9.78221
NM_001385981.1	27.7717	42.6766	33.6	29.0555	31.4011	31.4402	93.013	37.2872	42.9128	48.9216	65.8017	61.954
NM_001385994.1	14.4896	14.9567	7.39199	7.33877	6.45467	5.95709	31.0043	57.3649	54.3562	55.9104	23.5006	65.2147
NM_001386135.1	85.1262	97.518	72.2399	72.6388	78.5028	87.0397	103.348	143.412	125.877	101.338	89.3024	97.8221
NM_001386140.1	33.2053	42.2777	40.9919	36.9934	42.3915	40.3758	10.3348	37.2872	25.7477	27.9552	18.8005	13.0429
NM_001386188.2	87.5411	103.301	97.1039	75.6342	84.4341	75.1255	155.022	129.071	111.573	111.821	65.8017	91.3006
NM_001386298.1	54.3359	49.2575	41.6639	27.7076	26.8654	31.1092	191.193	180.7	188.816	122.304	145.704	101.083
NM_001386393.1	46.4874	49.457	51.4079	49.8737	50.7651	53.2829	51.6739	60.2332	28.6085	27.9552	28.2007	55.4325
NM_001386795.1	57.3545	65.6102	70.8959	59.9083	49.1951	46.3329	93.013	91.7839	51.4953	41.9328	47.0012	39.1288
NM_001386863.1	158.781	142.588	148.176	128.354	141.479	139.33	201.528	217.987	145.903	118.81	131.603	153.255
NM_001386888.1	356.202	340.216	355.824	288.608	337.562	321.021	506.404	470.393	454.875	370.406	474.713	466.285
NM_001386889.1	12.0746	13.3614	13.776	9.7351	10.1181	7.28089	10.3348	8.60474	14.3043	3.4944	9.40025	13.0429
NM_001386928.1	48.2986	44.272	50.3999	72.7886	70.8269	55.2686	15.5022	17.2095	20.026	38.4384	23.5006	35.8681
NM_001386936.1	99.6158	86.3503	89.7119	78.4799	86.7019	77.7731	124.017	123.335	94.4081	136.282	159.804	153.255
NM_001387011.1	35.0164	37.691	39.6479	29.8044	35.9368	35.4116	67.1761	83.1792	45.7736	34.944	51.7014	68.4754
NM_001387048.1	25.9605	34.5002	42.3359	41.187	38.0302	47.9877	15.5022	5.73649	48.6345	27.9552	61.1016	42.3896
NM_001387283.1	333.26	304.32	355.152	241.58	279.295	321.021	439.228	344.19	380.493	331.968	408.911	361.942
NM_001387287.1	9.65971	14.9567	17.136	17.673	13.6071	13.8999	10.3348	2.86825	8.58256	17.472	18.8005	6.52147
NM_001387360.1	18.7157	20.9394	17.808	19.1707	15.875	12.5761	41.3391	51.6284	34.3302	38.4384	32.9009	13.0429
NM_001387430.1	13.8858	11.9654	8.06399	6.1406	7.32692	6.28804	82.6782	43.0237	54.3562	38.4384	18.8005	29.3466
NM_001387552.1	147.914	129.625	147.84	138.388	135.025	130.394	67.1761	120.466	123.017	87.36	136.304	136.951
NM_001387579.1	121.954	103.102	90.3839	73.2379	72.5714	78.435	108.515	123.335	97.269	139.776	112.803	104.344
NM_001387691.1	82.1075	83.3589	73.2479	50.7723	58.6154	67.8446	217.03	140.544	151.625	90.8544	108.103	133.69
NM_001387844.1	570.527	595.877	561.119	419.059	497.707	463.66	583.915	530.626	446.293	331.968	366.61	505.414
NM_001387850.1	54.9396	42.2777	32.928	29.0555	29.6566	32.764	31.0043	22.946	31.4694	38.4384	28.2007	22.8251
NM_001387994.1	304.281	274.008	279.888	239.184	264.816	269.062	475.4	478.997	534.979	412.339	427.711	368.463
NM_001388.5	36.2239	27.321	27.216	36.6938	31.75	35.0806	25.8369	37.2872	28.6085	24.4608	14.1004	35.8681
NM_001388303.1	79.6926	86.3503	82.9919	78.1804	80.5962	72.8089	232.533	223.723	165.929	206.17	169.204	215.209
NM_001388306.1	195.005	182.073	169.344	88.8141	93.68	109.213	397.889	358.531	317.555	192.192	155.104	257.598
NM_001388419.1	15.0933	19.1446	17.808	17.2236	17.6195	21.5117	77.5108	77.4427	68.6604	59.4048	28.2007	45.6503
NM_001388490.1	79.6926	84.356	77.9519	42.0856	47.7995	49.6424	129.185	212.25	183.095	104.832	150.404	68.4754
NM_001388492.1	133.425	156.348	152.88	156.66	168.345	155.877	325.546	315.507	277.503	286.541	310.208	335.856
NM_001389683.1	56.1471	44.6708	44.6879	56.164	48.8462	54.6067	139.52	86.0474	165.929	125.798	108.103	97.8221
NM_001391906.1	198.628	207.4	198.576	198.297	222.599	206.512	191.193	163.49	214.564	181.709	206.805	205.426
NM_001391956.1	35.0164	39.4858	33.6	38.0418	35.4135	41.6996	87.8456	80.3109	91.5473	66.3936	61.1016	88.0399
NM_001391963.1	559.056	554.995	560.111	547.562	522.828	583.795	527.074	599.464	577.892	457.766	446.512	417.374
NM_001392073.1	12.0746	13.1619	15.456	24.7122	15.875	16.5475	10.3348	31.5507	40.0519	34.944	14.1004	19.5644
NM_001393381.1	13.8858	14.5579	14.112	13.0301	9.07143	6.61899	31.0043	31.5507	5.7217	6.9888	14.1004	32.6074
NM_001393769.1	14.4896	12.3642	11.424	6.44014	7.50137	9.26659	5.16739	40.1555	22.8868	17.472	28.2007	16.3037
NM_001393918.1	16.9045	11.9654	13.44	11.083	8.89698	10.5904	62.0087	34.419	48.6345	31.4496	9.40025	22.8251
NM_001393986.1	178.705	136.405	132.048	78.1804	94.0289	70.4922	155.022	146.281	200.26	104.832	117.503	127.169
NM_001393997.1	129.802	133.015	131.04	87.6159	106.24	107.559	294.541	246.669	203.12	164.237	178.605	172.819
NM_001394.7	22.3381	35.4973	32.256	39.0902	41.6937	41.6996	46.5065	60.2332	82.9647	76.8768	89.3024	52.1718
NM_001394014.1	89.3523	80.3676	77.2799	71.1411	72.2225	74.4636	87.8456	97.5204	105.852	83.8656	131.603	107.604
NM_001394031.1	7.84851	10.1706	11.088	14.5278	15.3516	17.2094	31.0043	22.946	31.4694	38.4384	51.7014	55.4325
NM_001394062.1	432.876	503.145	451.247	502.631	522.654	485.172	992.139	1095.67	952.664	1065.79	1264.33	1255.38
NM_001394067.2	172.064	146.177	151.536	91.8095	105.543	109.544	299.709	278.22	254.616	171.226	192.705	136.951
NM_001394073.1	12.0746	11.3671	10.416	13.4794	12.7349	9.59753	0	2.86825	11.4434	10.4832	4.70012	16.3037
NM_001394098.1	58.562	43.0754	48.7199	33.8482	31.4011	38.0592	82.6782	22.946	34.3302	13.9776	23.5006	32.6074
NM_001394154.1	38.6388	28.9164	38.304	41.6363	43.0893	39.052	82.6782	86.0474	40.0519	73.3824	61.1016	61.954
NM_001394372.1	12.6784	10.9683	10.08	8.98625	8.54808	9.92848	36.1717	45.892	42.9128	31.4496	32.9009	32.6074
NM_001394390.1	15.697	18.7458	17.808	17.3734	13.6071	16.5475	51.6739	17.2095	17.1651	27.9552	23.5006	29.3466
NM_001394395.1	10.8672	14.3585	12.432	18.1223	16.3984	13.5689	31.0043	54.4967	17.1651	41.9328	65.8017	42.3896
NM_001394674.1	86.3337	83.5583	77.2799	84.6205	83.2129	85.385	67.1761	83.1792	60.0779	48.9216	28.2007	68.4754
NM_001394779.1	12.0746	13.1619	11.424	15.2766	13.956	12.2451	20.6696	20.0777	11.4434	24.4608	23.5006	22.8251
NM_001394796.1	68.2217	68.0033	72.2399	80.2771	62.6278	82.0755	51.6739	48.7602	57.217	69.888	42.3011	68.4754
NM_001394837.1	319.978	304.12	331.296	337.583	350.82	333.597	273.872	255.274	277.503	300.518	192.705	257.598
NM_001394901.1	112.898	81.9629	95.4239	59.3092	66.4657	73.4708	87.8456	71.7062	74.3821	48.9216	94.0025	35.8681
NM_001394928.1	65.8068	71.9918	86.3519	99.8971	106.938	106.566	5.16739	20.0777	37.1911	59.4048	23.5006	42.3896
NM_001394955.1	38.6388	30.3123	36.288	37.1432	36.6346	29.4545	15.5022	25.8142	25.7477	10.4832	32.9009	16.3037
NM_001397.3	81.5038	90.3387	94.7519	74.8854	81.6429	80.0898	87.8456	111.862	105.852	52.416	117.503	91.3006
NM_001398.3	53.7321	58.0322	51.0719	48.0764	47.625	46.6639	36.1717	37.2872	51.4953	31.4496	56.4015	45.6503
NM_001402.6	14767.9	11680	13086.5	11394	10999.6	10357.4	19093.5	16022	17045	12943.3	13226.2	13724.4
NM_001404.5	1247.91	1065.12	1033.2	768.923	720.481	779.386	1648.4	1422.65	1507.67	1439.69	1372.44	1304.29
NM_001407.3	39.8463	44.8702	38.64	42.5349	42.9148	50.9662	242.867	126.203	203.12	150.259	192.705	159.776
NM_001408.3	195.005	186.66	191.52	151.718	160.495	175.403	713.1	725.667	572.17	520.666	564.015	414.113
NM_001412.4	127.991	123.244	123.312	136.591	137.467	126.423	175.691	160.622	171.651	251.597	253.807	130.429
NM_001414.4	73.6553	70.9947	78.9599	89.1136	73.0948	90.3492	36.1717	40.1555	34.3302	41.9328	47.0012	55.4325
NM_001415.4	414.764	375.913	410.591	518.357	543.239	512.972	310.043	318.375	294.668	300.518	324.309	296.727
NM_001416.4	213.117	179.082	211.344	188.262	150.202	174.41	480.567	539.23	537.84	548.621	451.212	420.635
NM_001417.7	408.726	344.803	393.455	276.177	286.971	305.466	377.219	381.477	323.276	192.192	230.306	365.202
NM_001418.4	789.681	779.147	732.143	875.71	852.714	860.469	909.461	800.241	838.23	1188.1	1207.93	1301.03
NM_001419.3	190.779	190.649	218.064	155.462	159.099	171.763	103.348	117.598	137.321	108.326	75.202	97.8221
NM_001420.4	40.45	30.1129	31.248	26.9587	23.3764	43.0234	15.5022	43.0237	51.4953	31.4496	9.40025	32.6074
NM_001423.3	164.215	164.524	162.96	89.2634	82.864	97.961	263.537	266.747	251.755	80.3712	112.803	149.994
NM_001424.6	10.8672	12.7631	8.73599	12.5807	8.02473	7.61184	20.6696	17.2095	5.7217	27.9552	0	6.52147
NM_001425.3	15.697	17.7487	15.456	12.8803	13.6071	11.9142	25.8369	28.6825	48.6345	24.4608	23.5006	32.6074
NM_001426.4	42.2612	30.9106	27.216	13.3296	14.4794	17.8713	41.3391	45.892	48.6345	10.4832	18.8005	16.3037
NM_001427.4	110.483	98.7145	85.6799	43.7331	39.6003	35.7425	351.382	301.166	317.555	153.754	122.203	88.0399
NM_001428.5	2143.25	2032.12	2206.51	1945.07	2064.8	2008.53	2594.03	2601.5	2817.94	2103.63	2171.46	2246.65
NM_001429.4	249.945	233.923	221.76	202.49	193.466	195.26	351.382	306.902	254.616	297.024	258.507	322.813
NM_001431.4	176.29	147.573	147.168	165.497	179.161	184.008	144.687	200.777	102.991	181.709	211.506	211.948
NM_001436.4	175.686	164.724	176.736	158.008	180.033	160.51	248.035	177.831	226.007	195.686	169.204	169.558
NM_001440.4	57.9583	54.4425	63.5039	54.3668	53.033	58.909	180.859	131.939	197.399	178.214	126.903	149.994
NM_001444.3	199.232	147.972	164.64	224.806	202.712	181.36	149.854	140.544	185.955	164.237	122.203	143.472
NM_001446.5	812.019	885.24	901.823	1035.07	923.192	1000.13	387.554	542.099	512.092	447.283	394.81	528.239
NM_001448.3	2128.15	1841.67	1900.08	1851.77	1789.51	1670.3	1596.72	1459.94	1493.36	1289.43	1306.63	1284.73
NM_001455.4	19.3194	14.5579	18.816	11.2328	17.794	15.5546	56.8413	48.7602	42.9128	27.9552	79.9021	35.8681
NM_001457.4	83.315	78.1739	81.9839	103.641	122.813	115.501	98.1804	120.466	105.852	181.709	206.805	238.034
NM_001458.5	281.339	210.99	245.28	175.831	219.459	212.47	826.782	524.889	494.927	429.811	371.31	404.331
NM_001466.4	52.5247	51.0523	40.9919	41.0372	54.4286	40.0449	20.6696	54.4967	54.3562	59.4048	103.403	97.8221
NM_001469.5	967.178	950.651	973.055	977.853	964.712	974.977	1069.65	923.576	972.69	943.488	841.322	854.313
NM_001470.4	13.8858	19.9423	14.784	18.1223	14.3049	24.1593	118.85	123.335	102.991	87.36	98.7026	107.604
NM_001482.3	64.5993	55.2402	70.8959	55.7147	48.8462	54.6067	41.3391	34.419	22.8868	34.944	70.5019	35.8681
NM_001483.3	74.259	85.9514	79.6319	88.5145	78.5028	85.385	20.6696	31.5507	34.3302	20.9664	23.5006	39.1288
NM_001485.4	44.6762	74.1854	69.8879	39.9888	47.4506	47.9877	72.3435	54.4967	82.9647	45.4272	56.4015	35.8681
NM_001487.4	30.1866	27.5204	35.28	30.703	33.3201	28.4617	20.6696	11.473	17.1651	31.4496	28.2007	16.3037
NM_001493.3	316.356	261.843	285.264	222.559	215.97	251.522	273.872	212.25	211.703	195.686	197.405	306.509
NM_001494.4	1103.62	1110.39	1075.53	1346.74	1260.75	1178.18	1204	1305.05	1167.23	1313.89	1156.23	1124.95
NM_001497.4	10.8672	11.3671	8.39999	9.58533	9.94368	13.5689	5.16739	8.60474	8.58256	3.4944	9.40025	6.52147
NM_001498.4	13.8858	18.3469	18.48	29.8044	22.3297	25.1522	15.5022	14.3412	8.58256	24.4608	18.8005	29.3466
NM_001500.4	9.65971	10.1706	15.792	14.8273	15.875	14.5618	5.16739	5.73649	11.4434	13.9776	4.70012	9.78221
NM_001510.4	6.64105	12.7631	8.06399	10.484	10.2926	12.2451	0	17.2095	14.3043	10.4832	4.70012	0
NM_001512.4	77.8814	69.5987	68.8799	87.3164	80.2473	95.6444	46.5065	43.0237	77.243	48.9216	61.1016	61.954
NM_001514.6	53.7321	51.0523	59.1359	60.0581	53.5563	63.5423	98.1804	111.862	91.5473	76.8768	61.1016	52.1718
NM_001516.5	39.8463	50.4541	53.4239	83.8716	82.1662	83.7302	36.1717	48.7602	42.9128	69.888	70.5019	32.6074
NM_001519.4	11.4709	14.7573	16.8	11.5324	10.6415	8.60469	10.3348	14.3412	20.026	13.9776	4.70012	6.52147
NM_001520.4	196.817	194.637	205.296	170.289	206.898	165.475	310.043	278.22	300.389	213.158	216.206	238.034
NM_001527.4	994.95	938.685	947.183	1085.09	1054.38	943.868	780.276	863.342	832.508	863.117	1001.13	740.187
NM_001530.4	498.079	563.371	505.679	545.915	563.999	545.736	299.709	361.399	303.25	297.024	319.608	303.248
NM_001533.3	949.67	967.003	910.223	772.368	788.691	880.657	630.422	777.295	700.909	569.587	507.613	697.797
NM_001536.6	297.64	329.447	326.592	264.196	283.133	293.883	279.039	272.483	363.328	171.226	188.005	264.12
NM_001537.4	123.765	108.087	128.352	138.238	121.418	118.149	82.6782	83.1792	102.991	108.326	94.0025	58.6932
NM_001539.4	665.313	547.417	572.207	499.635	456.886	490.136	527.074	599.464	543.562	359.923	399.511	420.635
NM_001540.5	74.259	78.1739	82.9919	72.6388	71.3503	77.1112	124.017	140.544	183.095	136.282	141.004	149.994
NM_001543.5	41.6575	42.4771	39.6479	31.6016	30.5288	30.4474	227.365	206.514	183.095	104.832	173.905	166.298
NM_001545.3	22.9418	22.3354	23.856	27.8574	29.831	25.1522	31.0043	28.6825	22.8868	13.9776	18.8005	19.5644
NM_001546.4	89.3523	65.6102	73.9199	9.88487	14.4794	17.2094	113.683	114.73	123.017	20.9664	4.70012	22.8251
NM_001550.4	62.7881	51.4512	55.4399	46.4289	45.3571	47.6567	72.3435	43.0237	48.6345	48.9216	51.7014	68.4754
NM_001551.3	47.0911	36.4944	43.6799	37.7422	32.4478	31.7711	20.6696	31.5507	40.0519	31.4496	18.8005	22.8251
NM_001553.3	9.65971	14.159	14.112	19.9195	15.7006	17.2094	10.3348	11.473	14.3043	3.4944	9.40025	9.78221
NM_001554.5	1222.56	1008.08	1020.43	440.775	466.132	474.582	1085.15	892.025	901.168	335.462	427.711	430.417
NM_001556.3	24.753	24.9279	20.496	19.4702	20.7596	25.8141	41.3391	28.6825	31.4694	34.944	32.9009	35.8681
NM_001560.3	47.6948	46.8645	58.1279	61.7056	61.4066	71.816	15.5022	22.946	20.026	17.472	28.2007	42.3896
NM_001567.4	58.562	67.2056	62.4959	54.8161	51.6374	58.5781	273.872	215.119	183.095	209.664	136.304	166.298
NM_001568.3	272.887	276.401	248.64	240.532	219.11	236.96	573.58	559.308	583.614	436.8	479.413	388.028
NM_001569.4	16.9045	15.1562	13.44	9.7351	13.2582	17.5403	67.1761	100.389	74.3821	73.3824	65.8017	29.3466
NM_001571.6	22.9418	23.1331	23.52	20.5186	20.2363	16.8784	56.8413	54.4967	40.0519	45.4272	18.8005	65.2147
[truncated: 6,434 more rows]
